# Supplementary material for: Characterization of porcine simple sequence repeat variation on a population scale with genome resequencing data
Source: PubMed Central journal article supplement (PMC5443785; doi:10.1038/s41598-017-02600-8), 2017-05-24
Supplement: 41598_2017_2600_MOESM1_ESM.pdf [file 41598_2017_2600_MOESM1_ESM.pdf]

# **Characterization of porcine simple sequence repeat variation on a population scale with genome resequencing data**

Congcong Liu<sup>1</sup>, Yan Liu<sup>1</sup>, Xinyi Zhang<sup>1</sup>, Xuewen Xu<sup>1,2,\*</sup>, Shuhong Zhao<sup>1,2</sup>

<sup>1</sup>Key Lab of Agricultural Animal Genetics, Breeding, and Reproduction of the Ministry of Education & Key Lab of Swine Genetics and Breeding of the Ministry of Agriculture, College of Animal Science and Technology, Huazhong Agricultural University, Wuhan, 430070 Hubei, PR China

<sup>2</sup>The Cooperative Innovation Center for Sustainable Pig Production, Wuhan 430070, China

\*Corresponding author

Contact information

Xuewen Xu

College of Animal Science and Technology,

Huazhong Agricultural University,

Wuhan, 430070 Hubei, China

Tel.: +86 27 87388470

Fax: +86 27 87280408

Email: [xuewen\\_xu@mail.hzau.edu.cn](mailto:xuewen_xu@mail.hzau.edu.cn)

**Supplementary Table S1. Distribution of each kind of SSRs in pig genome.**

| Chromosome | SSR Type        | SSR Count | Count/Mbp | Density(bp/Mbp) |
|------------|-----------------|-----------|-----------|-----------------|
| 1          | Dinucleotide    | 46900     | 148.737   | 2997.076        |
| 1          | Trinucleotide   | 24229     | 76.839    | 1397.803        |
| 1          | Tetranucleotide | 59311     | 188.097   | 3771.753        |
| 1          | Pentanucleotide | 33042     | 104.788   | 2147.679        |
| 1          | Hexanucleotide  | 24604     | 78.028    | 1816.823        |
| 2          | Dinucleotide    | 24529     | 150.883   | 3033.646        |
| 2          | Trinucleotide   | 13209     | 81.251    | 1473.586        |
| 2          | Tetranucleotide | 32234     | 198.278   | 3981.715        |
| 2          | Pentanucleotide | 17750     | 109.184   | 2232.395        |
| 2          | Hexanucleotide  | 14319     | 88.079    | 2053.246        |
| 3          | Dinucleotide    | 22044     | 152.251   | 3095.955        |
| 3          | Trinucleotide   | 12165     | 84.02     | 1533.719        |
| 3          | Tetranucleotide | 29068     | 200.763   | 4109.849        |
| 3          | Pentanucleotide | 15995     | 110.472   | 2291.319        |
| 3          | Hexanucleotide  | 13973     | 96.507    | 2270.33         |
| 4          | Dinucleotide    | 21996     | 153.319   | 3114.725        |
| 4          | Trinucleotide   | 11723     | 81.713    | 1476.803        |
| 4          | Tetranucleotide | 28391     | 197.894   | 3995.345        |
| 4          | Pentanucleotide | 15629     | 108.939   | 2261.645        |
| 4          | Hexanucleotide  | 12503     | 87.15     | 2030.092        |
| 5          | Dinucleotide    | 16763     | 150.332   | 3005.988        |
| 5          | Trinucleotide   | 9472      | 84.946    | 1542.53         |
| 5          | Tetranucleotide | 21750     | 195.056   | 3908.16         |
| 5          | Pentanucleotide | 12238     | 109.752   | 2252.247        |
| 5          | Hexanucleotide  | 9637      | 86.426    | 2007.274        |
| 6          | Dinucleotide    | 23181     | 146.933   | 2981.474        |
| 6          | Trinucleotide   | 13657     | 86.565    | 1593.776        |
| 6          | Tetranucleotide | 31856     | 201.92    | 4130.349        |
| 6          | Pentanucleotide | 17490     | 110.861   | 2284.522        |
| 6          | Hexanucleotide  | 15072     | 95.534    | 2230.607        |
| 7          | Dinucleotide    | 20227     | 150.091   | 3051.575        |
| 7          | Trinucleotide   | 11504     | 85.364    | 1560.344        |
| 7          | Tetranucleotide | 26943     | 199.927   | 4047.757        |
| 7          | Pentanucleotide | 15119     | 112.188   | 2326.458        |
| 7          | Hexanucleotide  | 12704     | 94.268    | 2203.028        |
| 8          | Dinucleotide    | 23586     | 158.837   | 3233.538        |
| 8          | Trinucleotide   | 11493     | 77.398    | 1414.933        |
| 8          | Tetranucleotide | 28623     | 192.758   | 3883.46         |
| 8          | Pentanucleotide | 15801     | 106.41    | 2203.098        |
| 8          | Hexanucleotide  | 12250     | 82.496    | 1927.756        |
| 9          | Dinucleotide    | 23709     | 154.285   | 3109.822        |
| 9          | Trinucleotide   | 12367     | 80.478    | 1466.042        |
| 9          | Tetranucleotide | 29440     | 191.579   | 3794.522        |
| 9          | Pentanucleotide | 16485     | 107.275   | 2189.501        |
| 9          | Hexanucleotide  | 12236     | 79.625    | 1875.569        |
| 10         | Dinucleotide    | 12618     | 159.515   | 3281.798        |
| 10         | Trinucleotide   | 6558      | 82.905    | 1509.854        |
| 10         | Tetranucleotide | 15955     | 201.701   | 4151.961        |
| 10         | Pentanucleotide | 8909      | 112.626   | 2330.904        |
| 10         | Hexanucleotide  | 8056      | 101.843   | 2406.97         |
| 11         | Dinucleotide    | 13576     | 154.817   | 3111.965        |
| 11         | Trinucleotide   | 6827      | 77.853    | 1420.837        |
| 11         | Tetranucleotide | 16851     | 192.164   | 3893.714        |

|     |                 |        |         |          |
|-----|-----------------|--------|---------|----------|
| 11  | Pentanucleotide | 9272   | 105.735 | 2164.736 |
| 11  | Hexanucleotide  | 7488   | 85.391  | 1981.148 |
| 12  | Dinucleotide    | 9015   | 141.771 | 2811.622 |
| 12  | Trinucleotide   | 5990   | 94.199  | 1714.836 |
| 12  | Tetranucleotide | 13282  | 208.874 | 4145.336 |
| 12  | Pentanucleotide | 7586   | 119.298 | 2448.144 |
| 12  | Hexanucleotide  | 7058   | 110.995 | 2583.672 |
| 13  | Dinucleotide    | 33032  | 151.083 | 3031.648 |
| 13  | Trinucleotide   | 16782  | 76.758  | 1385.495 |
| 13  | Tetranucleotide | 42751  | 195.536 | 3930.711 |
| 13  | Pentanucleotide | 23367  | 106.877 | 2207.023 |
| 13  | Hexanucleotide  | 17311  | 79.178  | 1837.952 |
| 14  | Dinucleotide    | 23893  | 155.299 | 3171.893 |
| 14  | Trinucleotide   | 13315  | 86.544  | 1593.122 |
| 14  | Tetranucleotide | 31416  | 204.196 | 4136.288 |
| 14  | Pentanucleotide | 17150  | 111.471 | 2287.459 |
| 14  | Hexanucleotide  | 14146  | 91.946  | 2139.394 |
| 15  | Dinucleotide    | 24274  | 153.943 | 3129.198 |
| 15  | Trinucleotide   | 11872  | 75.291  | 1363.038 |
| 15  | Tetranucleotide | 30296  | 192.134 | 3906.01  |
| 15  | Pentanucleotide | 16773  | 106.373 | 2196.255 |
| 15  | Hexanucleotide  | 12422  | 78.779  | 1821.455 |
| 16  | Dinucleotide    | 13865  | 159.553 | 3248.197 |
| 16  | Trinucleotide   | 6755   | 77.734  | 1420.592 |
| 16  | Tetranucleotide | 16625  | 191.314 | 3846.443 |
| 16  | Pentanucleotide | 9178   | 105.617 | 2158.61  |
| 16  | Hexanucleotide  | 6774   | 77.953  | 1815.74  |
| 17  | Dinucleotide    | 10542  | 151.245 | 3141.464 |
| 17  | Trinucleotide   | 5778   | 82.896  | 1537.713 |
| 17  | Tetranucleotide | 14511  | 208.188 | 4371.723 |
| 17  | Pentanucleotide | 7895   | 113.269 | 2360.406 |
| 17  | Hexanucleotide  | 6642   | 95.292  | 2233.45  |
| 18  | Dinucleotide    | 9373   | 153.103 | 3033.401 |
| 18  | Trinucleotide   | 5035   | 82.244  | 1561.106 |
| 18  | Tetranucleotide | 11533  | 188.386 | 3662.377 |
| 18  | Pentanucleotide | 6529   | 106.648 | 2176.214 |
| 18  | Hexanucleotide  | 5600   | 91.473  | 2135.231 |
| X   | Dinucleotide    | 22613  | 156.721 | 3250.66  |
| X   | Trinucleotide   | 11096  | 76.902  | 1439.14  |
| X   | Tetranucleotide | 26716  | 185.157 | 3725.703 |
| X   | Pentanucleotide | 14991  | 103.896 | 2135.691 |
| X   | Hexanucleotide  | 12369  | 85.724  | 1999.193 |
| Y   | Dinucleotide    | 207    | 126.396 | 2383.808 |
| Y   | Trinucleotide   | 144    | 87.927  | 1599.789 |
| Y   | Tetranucleotide | 315    | 192.341 | 4142.965 |
| Y   | Pentanucleotide | 181    | 110.52  | 2308.703 |
| Y   | Hexanucleotide  | 144    | 87.927  | 2430.824 |
| All | Dinucleotide    | 395943 | 152.483 | 3089.982 |
| All | Trinucleotide   | 209971 | 80.863  | 1477.24  |
| All | Tetranucleotide | 507867 | 195.586 | 3947.496 |
| All | Pentanucleotide | 281380 | 108.363 | 2230.945 |
| All | Hexanucleotide  | 225308 | 86.769  | 2024.533 |

**Supplementary Table S2. Distribution of SSRs in different genomic regions.**

| unit | length | feature    | count   | count/Mb | length   | length/Mb |
|------|--------|------------|---------|----------|----------|-----------|
| 2    |        | 3' utr     | 1971    | 146.447  | 37085    | 2755.445  |
| 2    |        | 5' utr     | 354     | 122.389  | 6409     | 2215.788  |
| 2    |        | cds        | 845     | 26.083   | 11397    | 351.794   |
| 2    |        | exon       | 238     | 122.989  | 5740     | 2966.203  |
| 2    |        | intron     | 115445  | 153.526  | 2273707  | 3023.714  |
| 2    |        | promoter   | 8901    | 159.578  | 176721   | 3168.263  |
| 2    |        | intergenic | 295353  | 154.093  | 6046489  | 3154.604  |
| 3    |        | 3' utr     | 1011    | 75.118   | 17745    | 1318.468  |
| 3    |        | 5' utr     | 1485    | 513.41   | 30788    | 10644.356 |
| 3    |        | cds        | 6832    | 210.885  | 131087   | 4046.291  |
| 3    |        | exon       | 312     | 161.229  | 6371     | 3292.278  |
| 3    |        | intron     | 65568   | 87.196   | 1185662  | 1576.766  |
| 3    |        | promoter   | 6452    | 115.672  | 121658   | 2181.09   |
| 3    |        | intergenic | 145963  | 76.153   | 2667311  | 1391.602  |
| 4    |        | 3' utr     | 2153    | 159.97   | 37031    | 2751.433  |
| 4    |        | 5' utr     | 719     | 248.58   | 12413    | 4291.555  |
| 4    |        | cds        | 1470    | 45.375   | 23956    | 739.455   |
| 4    |        | exon       | 212     | 109.553  | 3963     | 2047.92   |
| 4    |        | intron     | 159129  | 211.619  | 3121794  | 4151.552  |
| 4    |        | promoter   | 12208   | 218.866  | 240685   | 4315.012  |
| 4    |        | intergenic | 368982  | 192.507  | 7533565  | 3930.448  |
| 5    |        | 3' utr     | 1616    | 120.07   | 30652    | 2277.468  |
| 5    |        | 5' utr     | 740     | 255.841  | 15136    | 5232.979  |
| 5    |        | cds        | 1333    | 41.146   | 23705    | 731.707   |
| 5    |        | exon       | 183     | 94.567   | 3408     | 1761.118  |
| 5    |        | intron     | 89952   | 119.624  | 1835760  | 2441.306  |
| 5    |        | promoter   | 8091    | 145.056  | 164774   | 2954.076  |
| 5    |        | intergenic | 200977  | 104.855  | 4158150  | 2169.41   |
| 6    |        | 3' utr     | 1046    | 77.719   | 23363    | 1735.889  |
| 6    |        | 5' utr     | 392     | 135.526  | 9180     | 3173.807  |
| 6    |        | cds        | 2045    | 63.123   | 49450    | 1526.384  |
| 6    |        | exon       | 145     | 74.93    | 3670     | 1896.509  |
| 6    |        | intron     | 76767   | 102.089  | 1775897  | 2361.696  |
| 6    |        | promoter   | 6082    | 109.038  | 142212   | 2549.584  |
| 6    |        | intergenic | 157203  | 82.017   | 3677799  | 1918.799  |
| all  |        | 3' utr     | 7797    | 579.323  | 145876   | 10838.702 |
| all  |        | 5' utr     | 3690    | 1275.746 | 73926    | 25558.485 |
| all  |        | cds        | 12525   | 386.612  | 239595   | 7395.632  |
| all  |        | exon       | 1090    | 563.268  | 23152    | 11964.029 |
| all  |        | intron     | 506861  | 674.055  | 10192820 | 13555.034 |
| all  |        | promoter   | 41734   | 748.209  | 846050   | 15168.025 |
| all  |        | intergenic | 1168478 | 609.624  | 24083314 | 12564.864 |



### Supplementary Table S3. Information of 102 individuals.

| Run        | Bases  | Study     | BioSample    | Breed         |
|------------|--------|-----------|--------------|---------------|
| SRR1004277 | 13. 4G | SRP030626 | SAMN02364505 | Berkshire     |
| SRR1004278 | 11. 5G | SRP030626 | SAMN02364506 | Berkshire     |
| SRR1004279 | 11. 4G | SRP030626 | SAMN02364507 | Berkshire     |
| ERR173171  | 23. 5G | ERP001813 | SAMEA1557419 | Duroc         |
| ERR173172  | 12. 3G | ERP001813 | SAMEA1557423 | Duroc         |
| ERR173173  | 15. 4G | ERP001813 | SAMEA1557434 | Duroc         |
| ERR173174  | 23. 4G | ERP001813 | SAMEA1557391 | Hampshire     |
| ERR173175  | 20. 6G | ERP001813 | SAMEA1557400 | Hampshire     |
| ERR173179  | 21. 4G | ERP001813 | SAMEA1557388 | Jiangquhai    |
| SRR652374  | 11. 6G | SRP018123 | SAMN01894455 | Jinhua        |
| SRR652375  | 12. 4G | SRP018123 | SAMN01894456 | Jinhua        |
| SRR652376  | 10. 6G | SRP018123 | SAMN01894457 | Jinhua        |
| ERR173180  | 19G    | ERP001813 | SAMEA1557405 | Landrace      |
| ERR173181  | 28. 1G | ERP001813 | SAMEA1557416 | Landrace      |
| ERR173182  | 18. 4G | ERP001813 | SAMEA1557426 | Landrace      |
| ERR173183  | 15. 1G | ERP001813 | SAMEA1557436 | Landrace      |
| ERR173184  | 15. 5G | ERP001813 | SAMEA1557390 | Landrace      |
| ERR173185  | 11. 2G | ERP001813 | SAMEA1557412 | LargeWhite    |
| ERR173186  | 20. 8G | ERP001813 | SAMEA1557415 | LargeWhite    |
| ERR173187  | 20. 8G | ERP001813 | SAMEA1557431 | LargeWhite    |
| ERR173188  | 20. 8G | ERP001813 | SAMEA1557413 | LargeWhite    |
| ERR173189  | 19. 2G | ERP001813 | SAMEA1557402 | LargeWhite    |
| ERR173191  | 19. 5G | ERP001813 | SAMEA1557435 | LargeWhite    |
| ERR173192  | 20. 9G | ERP001813 | SAMEA1557422 | LargeWhite    |
| ERR173193  | 20. 3G | ERP001813 | SAMEA1557406 | LargeWhite    |
| ERR173194  | 17. 3G | ERP001813 | SAMEA1557404 | LargeWhite    |
| ERR173195  | 18G    | ERP001813 | SAMEA1557383 | LargeWhite    |
| ERR173196  | 19. 2G | ERP001813 | SAMEA1557425 | LargeWhite    |
| ERR173197  | 17. 5G | ERP001813 | SAMEA1557427 | LargeWhite    |
| ERR173198  | 17. 6G | ERP001813 | SAMEA1557399 | LargeWhite    |
| SRR1178916 | 40. 9G | SRP039012 | SAMN02665306 | mangalica     |
| SRR1178923 | 63. 2G | SRP039012 | SAMN02665304 | mangalica     |
| SRR1178925 | 41. 8G | SRP039012 | SAMN02665305 | mangalica     |
| ERR173199  | 18. 9G | ERP001813 | SAMEA1557420 | Meishan       |
| ERR173200  | 18. 8G | ERP001813 | SAMEA1557428 | Meishan       |
| ERR173201  | 17. 9G | ERP001813 | SAMEA1557395 | Meishan       |
| ERR173202  | 20. 8G | ERP001813 | SAMEA1557410 | Meishan       |
| SRR652357  | 15. 7G | SRP018123 | SAMN01894447 | Neijiang      |
| SRR652363  | 11. 4G | SRP018123 | SAMN01894452 | Neijiang      |
| SRR652348  | 11. 8G | SRP018123 | SAMN01894438 | Penzhou       |
| SRR652350  | 14. 1G | SRP018123 | SAMN01894440 | Penzhou       |
| ERR173204  | 21. 4G | ERP001813 | SAMEA1557430 | Pietrain      |
| ERR173205  | 21. 7G | ERP001813 | SAMEA1557432 | Pietrain      |
| ERR173206  | 17. 2G | ERP001813 | SAMEA1557392 | Pietrain      |
| ERR173207  | 11. 3G | ERP001813 | SAMEA1557408 | Pietrain      |
| ERR173208  | 22. 7G | ERP001813 | SAMEA1557397 | Pietrain      |
| ERR173209  | 20. 2G | ERP001813 | SAMEA1557409 | SusCebifrons  |
| ERR173211  | 25. 9G | ERP001813 | SAMEA1557384 | SusVerrucosus |
| SRR652258  | 12. 2G | SRP018123 | SAMN01894346 | Tibetan       |
| SRR652264  | 11. 8G | SRP018123 | SAMN01894369 | Tibetan       |
| SRR652343  | 11. 5G | SRP018123 | SAMN01894412 | TibetanABa    |
| SRR652344  | 18. 6G | SRP018123 | SAMN01894434 | TibetanABa    |
| SRR652345  | 14. 5G | SRP018123 | SAMN01894435 | TibetanABa    |
| SRR652346  | 18. 5G | SRP018123 | SAMN01894436 | TibetanABa    |
| SRR652347  | 15. 1G | SRP018123 | SAMN01894437 | TibetanABa    |
| SRR652262  | 16G    | SRP018123 | SAMN01894367 | TibetanDiqing |
| SRR652265  | 17. 6G | SRP018123 | SAMN01894370 | TibetanDiqing |
| SRR652327  | 15. 6G | SRP018123 | SAMN01894407 | TibetanGannan |
| SRR652339  | 12G    | SRP018123 | SAMN01894408 | TibetanGannan |
| SRR652340  | 12. 9G | SRP018123 | SAMN01894409 | TibetanGannan |
| SRR652341  | 12. 5G | SRP018123 | SAMN01894410 | TibetanGannan |
| SRR652342  | 11. 7G | SRP018123 | SAMN01894411 | TibetanGannan |

|            |        |           |              |                               |
|------------|--------|-----------|--------------|-------------------------------|
| SRR652257  | 12G    | SRP018123 | SAMNO1894345 | TibetanGanzi                  |
| SRR652259  | 10. 6G | SRP018123 | SAMNO1894349 | TibetanGanzi                  |
| SRR652260  | 14. 3G | SRP018123 | SAMNO1894360 | TibetanGanzi                  |
| SRR652261  | 14. 2G | SRP018123 | SAMNO1894361 | TibetanGanzi                  |
| SRR652267  | 9. 8G  | SRP018123 | SAMNO1894387 | TibetanNyingchi               |
| SRR652268  | 19G    | SRP018123 | SAMNO1894388 | TibetanNyingchi               |
| SRR652269  | 13. 4G | SRP018123 | SAMNO1894389 | TibetanNyingchi               |
| SRR652270  | 12. 2G | SRP018123 | SAMNO1894390 | TibetanNyingchi               |
| SRR652302  | 17. 9G | SRP018123 | SAMNO1894391 | TibetanNyingchi               |
| SRR652303  | 14. 7G | SRP018123 | SAMNO1894392 | TibetanShigatse               |
| SRR652304  | 11. 5G | SRP018123 | SAMNO1894393 | TibetanShigatse               |
| SRR652305  | 15G    | SRP018123 | SAMNO1894394 | TibetanShigatse               |
| SRR652306  | 12. 4G | SRP018123 | SAMNO1894395 | TibetanShigatse               |
| SRR652307  | 14. 9G | SRP018123 | SAMNO1894406 | TibetanShigatse               |
| SRR1172563 | 22. 5G | SRP038221 | SAMNO2646543 | Tongcheng                     |
| SRR1172577 | 24. 4G | SRP038221 | SAMNO2646545 | Tongcheng                     |
| SRR1216635 | 17. 5G | SRP038221 | SAMNO2646544 | Tongcheng                     |
| SRR1216636 | 16. 6G | SRP038221 | SAMNO2646546 | Tongcheng                     |
| ERR173217  | 19. 2G | ERP001813 | SAMEA1557401 | WildBoarFrance                |
| ERR173212  | 22. 5G | ERP001813 | SAMEA1557411 | WildBoarJapan                 |
| ERR173215  | 10. 9G | ERP001813 | SAMEA1557394 | WildBoarNetherlandsMeinweg    |
| ERR173216  | 16. 3G | ERP001813 | SAMEA1557387 | WildBoarNetherlandsMeinweg    |
| ERR173213  | 18. 8G | ERP001813 | SAMEA1557424 | WildBoarNetherlandsVeluwe     |
| ERR173214  | 23. 5G | ERP001813 | SAMEA1557433 | WildBoarNetherlandsVeluwe     |
| ERR173221  | 9. 8G  | ERP001813 | SAMEA1557437 | WildBoarNorthChina            |
| ERR173222  | 20. 2G | ERP001813 | SAMEA1557421 | WildBoarNorthChina            |
| ERR173219  | 10. 3G | ERP001813 | SAMEA1557386 | WildboarSouthChina            |
| ERR173220  | 20. 8G | ERP001813 | SAMEA1557396 | WildBoarSouthChina            |
| SRR652377  | 12G    | SRP018123 | SAMNO1894458 | WildBoarSouthChina            |
| SRR652378  | 16. 3G | SRP018123 | SAMNO1894459 | WildBoarSouthChina            |
| SRR652379  | 16. 3G | SRP018123 | SAMNO1894460 | WildBoarSouthChina            |
| ERR173218  | 29. 4G | ERP001813 | SAMEA1557403 | WildBoarSwitzerlandMalcantone |
| SRR652351  | 15. 9G | SRP018123 | SAMNO1894441 | Wujin                         |
| SRR652352  | 14. 2G | SRP018123 | SAMNO1894442 | Wujin                         |
| SRR652353  | 12G    | SRP018123 | SAMNO1894443 | Wujin                         |
| ERR173223  | 18. 4G | ERP001813 | SAMEA1557398 | Xiang                         |
| ERR173224  | 18. 1G | ERP001813 | SAMEA1557385 | Xiang                         |
| SRR652354  | 12. 1G | SRP018123 | SAMNO1894444 | Yanan                         |
| SRR652355  | 11. 1G | SRP018123 | SAMNO1894445 | Yanan                         |
| SRR652356  | 13. 1G | SRP018123 | SAMNO1894446 | Yanan                         |

**Supplementary Table S4. Information of polymorphic SSRs.**

| motif        | chromosome | start    | end      | ref repeat | transcript id       | gene name | feature    | conservation | dbSNP         | alleles |
|--------------|------------|----------|----------|------------|---------------------|-----------|------------|--------------|---------------|---------|
| AC.GT        | 1          | 1084452  | 1084463  | 6          | ENSSSCT00000004431  | WDR27     | intron     | -0.432       | .             | 3       |
| AC.GT        | 1          | 1084452  | 1084463  | 6          | ENSSSCT00000004434  | ERMARD    | intron     | -0.432       | .             | 3       |
| AC.GT        | 1          | 1969878  | 1969899  | 11         | .                   | .         | intergenic | .            | rs788463500   | 4       |
| AAAAG.CTTTT  | 1          | 2874375  | 2874390  | 3.2        | .                   | .         | intergenic | 0.134        | 302872 rs7888 | 2       |
| AAAAC.GTTTT  | 1          | 3226034  | 3226057  | 4.8        | .                   | .         | intergenic | -0.132       | .             | 4       |
| AG.CT        | 1          | 4062541  | 4062553  | 6.5        | .                   | .         | intergenic | -0.332       | rs791046496   | 2       |
| AC.GT        | 1          | 4336676  | 4336697  | 11         | .                   | .         | intergenic | -0.303       | rs792187070   | 2       |
| ACAG.CTGT    | 1          | 4883530  | 4883563  | 8.5        | .                   | .         | intergenic | -0.032       | rs790720923   | 2       |
| AC.GT        | 1          | 5054068  | 5054086  | 9.5        | .                   | .         | intergenic | -0.235       | rs792589336   | 2       |
| AAAT.ATTT    | 1          | 6199497  | 6199513  | 4.25       | .                   | .         | intergenic | .            | rs790148838   | 2       |
| AAC.GTT      | 1          | 6344042  | 6344055  | 4.66667    | .                   | .         | intergenic | .            | rs706466330   | 2       |
| AAAT.ATTT    | 1          | 6600847  | 6600862  | 4          | .                   | .         | intergenic | -0.749       | rs788323413   | 2       |
| AAAC.GTTT    | 1          | 6603990  | 6604006  | 4.25       | .                   | .         | intergenic | -0.032       | 389601 rs7893 | 2       |
| AG.CT        | 1          | 6775793  | 6775814  | 11         | .                   | .         | intergenic | -0.211       | 355022 rs7902 | 4       |
| AT.AT        | 1          | 6887154  | 6887167  | 7          | .                   | .         | intergenic | 0.147        | 750062 rs7863 | 3       |
| AAAAC.GTTTT  | 1          | 6975470  | 6975501  | 6.4        | .                   | .         | intergenic | 0.207        | rs788965134   | 2       |
| AC.GT        | 1          | 7131330  | 7131362  | 16.5       | .                   | .         | intergenic | -0.023       | rs702403861   | 3       |
| AAAC.GTTT    | 1          | 7302256  | 7302284  | 7.25       | ENSSSCT00000004459  | PARK2     | intron     | 0.165        | 343149 rs7871 | 2       |
| AAAC.GTTT    | 1          | 7317717  | 7317738  | 5.5        | ENSSSCT00000004459  | PARK2     | intron     | -0.268       | 380533 rs7878 | 2       |
| AC.GT        | 1          | 7494020  | 7494032  | 6.5        | ENSSSCT00000004459  | PARK2     | intron     | .            | rs787554650   | 3       |
| AAT.ATT      | 1          | 7500466  | 7500483  | 6          | ENSSSCT00000004459  | PARK2     | intron     | 0.017        | rs789938892   | 2       |
| AAAT.ATTT    | 1          | 7537649  | 7537666  | 4.5        | ENSSSCT00000004459  | PARK2     | intron     | -0.607       | rs790609900   | 2       |
| AAAC.GTTT    | 1          | 7711651  | 7711665  | 3.75       | ENSSSCT00000004459  | PARK2     | intron     | .            | 703991 rs7932 | 2       |
| AG.CT        | 1          | 7841421  | 7841430  | 5          | .                   | .         | intergenic | -0.132       | rs697031563   | 2       |
| AAAAAT.ATTTT | 1          | 7966978  | 7966992  | 3          | .                   | .         | intergenic | .            | rs791064598   | 2       |
| AC.GT        | 1          | 7968585  | 7968610  | 13         | .                   | .         | intergenic | 0.018        | 342666 rs7885 | 2       |
| AAAAC.GTTTT  | 1          | 8390257  | 8390276  | 4          | ENSSSCT00000004461  | AGPAT4    | intron     | -0.069       | rs786341973   | 2       |
| ACAT.ATGT    | 1          | 8410522  | 8410536  | 3.75       | ENSSSCT00000004461  | AGPAT4    | intron     | -0.036       | rs793406062   | 2       |
| AGC.GCT      | 1          | 8517259  | 8517276  | 6          | ENSSSCT00000004465  | .         | intron     | -0.465       | rs793698502   | 2       |
| AC.GT        | 1          | 8829617  | 8829630  | 7          | ENSSSCT00000004467  | SLC22A3   | intron     | -0.075       | rs790865956   | 2       |
| AC.GT        | 1          | 9540541  | 9540555  | 7.5        | .                   | .         | intergenic | .            | rs792066398   | 2       |
| AAGG.CCTT    | 1          | 9555317  | 9555342  | 6.5        | .                   | .         | intergenic | -0.011       | rs793646991   | 2       |
| AT.AT        | 1          | 9656766  | 9656775  | 5          | .                   | .         | intergenic | -0.004       | rs697943185   | 2       |
| AAAAC.GTTTT  | 1          | 9842832  | 9842857  | 5.2        | ENSSSCT00000004480  | FNDC1     | intron     | -0.125       | rs789382973   | 2       |
| AATG.CATT    | 1          | 9931936  | 9931959  | 6          | .                   | .         | intergenic | -0.174       | rs789660373   | 2       |
| AAAGG.CCTTT  | 1          | 9995403  | 9995419  | 3.4        | .                   | .         | intergenic | -0.107       | rs790741907   | 2       |
| AAAAC.GTTTT  | 1          | 10140516 | 10140533 | 3.6        | ENSSSCT00000004483  | RSPH3     | intron     | .            | rs787080539   | 2       |
| AAAC.GTTT    | 1          | 10201654 | 10201677 | 6          | .                   | .         | intergenic | 0.198        | 381079 rs7896 | 2       |
| AAAC.GTTT    | 1          | 10652559 | 10652572 | 3.5        | .                   | .         | intergenic | .            | rs786371742   | 2       |
| AAAC.GTTT    | 1          | 10762186 | 10762204 | 4.75       | ENSSSCT00000027733  | .         | intron     | .            | .             | 2       |
| AAG.CTT      | 1          | 11460374 | 11460392 | 6.33333    | .                   | .         | intergenic | -0.223       | rs791901651   | 2       |
| AC.GT        | 1          | 11553654 | 11553668 | 7.5        | .                   | .         | intergenic | -0.039       | .             | 2       |
| AG.CT        | 1          | 11671921 | 11671931 | 5.5        | .                   | .         | intergenic | .            | .             | 2       |
| AAAC.GTTT    | 1          | 11713500 | 11713515 | 4          | ENSSSCT00000004492  | .         | intron     | 0.215        | rs789509937   | 2       |
| AAC.GTT      | 1          | 11742438 | 11742451 | 4.66667    | ENSSSCT00000004492  | .         | intron     | .            | rs790544711   | 2       |
| AC.GT        | 1          | 11922585 | 11922604 | 10         | .                   | .         | intergenic | .            | .             | 4       |
| AC.GT        | 1          | 12403704 | 12403725 | 11         | .                   | .         | intergenic | 0.31         | rs789806900   | 2       |
| AAG.CTT      | 1          | 12611170 | 12611183 | 4.66667    | .                   | .         | intergenic | -0.028       | rs791506100   | 2       |
| AAAT.ATTT    | 1          | 12627427 | 12627439 | 3.25       | .                   | .         | intergenic | 0.048        | rs791486872   | 2       |
| AC.GT        | 1          | 12666645 | 12666680 | 18         | .                   | .         | intergenic | 0.164        | 101909 rs7934 | 2       |
| AG.CT        | 1          | 12960924 | 12960936 | 6.5        | .                   | .         | intergenic | 0.124        | rs703979254   | 5       |
| ATC.GAT      | 1          | 13437854 | 13437869 | 5.33333    | .                   | .         | intergenic | 0.185        | rs790889517   | 2       |
| AAGC.GCTT    | 1          | 13495642 | 13495664 | 5.75       | .                   | .         | intergenic | .            | 366385 rs7894 | 2       |
| AAAAC.GTTTT  | 1          | 13599074 | 13599091 | 3          | ENSSSCT00000031943  | TFB1M     | intron     | .            | 390558 rs7917 | 2       |
| AC.GT        | 1          | 13613107 | 13613119 | 6.5        | ENSSSCT00000031943  | TFB1M     | intron     | -0.067       | 403028 rs7885 | 2       |
| AAAAC.GTTTT  | 1          | 13697925 | 13697948 | 4.8        | ENSSSCT00000004494  | TIAM2     | intron     | -0.2         | rs787491324   | 2       |
| AAAAC.GTTTT  | 1          | 13697925 | 13697948 | 4.8        | ENSSSCT000000027128 | TIAM2     | intron     | -0.2         | rs787491324   | 2       |
| AC.GT        | 1          | 13700410 | 13700420 | 5.5        | ENSSSCT00000004494  | TIAM2     | intron     | -0.1         | .             | 3       |
| AC.GT        | 1          | 13700410 | 13700420 | 5.5        | ENSSSCT000000027128 | TIAM2     | intron     | -0.1         | .             | 3       |
| AAAT.ATTT    | 1          | 13791250 | 13791270 | 5.25       | .                   | .         | intergenic | .            | .             | 2       |
| AAAT.ATTT    | 1          | 14407955 | 14407973 | 4.75       | ENSSSCT00000004500  | .         | intron     | 0.247        | rs788683343   | 2       |
| AC.GT        | 1          | 14600614 | 14600627 | 7          | ENSSSCT00000004501  | .         | intron     | 0            | rs793563016   | 2       |
| AAC.GTT      | 1          | 14623134 | 14623147 | 4.66667    | .                   | .         | intergenic | -0.119       | 327592 rs7892 | 5       |
| AAAG.CTTT    | 1          | 14896538 | 14896549 | 3          | .                   | .         | intergenic | -0.021       | .             | 2       |
| AAAC.GTTT    | 1          | 14928503 | 14928516 | 3.5        | .                   | .         | intergenic | 0.028        | rs792568041   | 2       |
| AC.GT        | 1          | 15405845 | 15405859 | 7.5        | .                   | .         | intergenic | .            | 302227 rs7870 | 2       |
| AAAAC.GTTTT  | 1          | 15519417 | 15519443 | 4.5        | .                   | .         | intergenic | -0.061       | rs692048080   | 2       |
| AT.AT        | 1          | 15564918 | 15564941 | 12         | .                   | .         | intergenic | 0.537        | 165066 rs7899 | 2       |
| AAAAC.GTTTT  | 1          | 15580047 | 15580070 | 4.8        | .                   | .         | intergenic | 0.181        | rs791463609   | 2       |
| AC.GT        | 1          | 15730042 | 15730053 | 6          | .                   | .         | intergenic | .            | .             | 2       |
| AT.AT        | 1          | 15811346 | 15811364 | 9.5        | .                   | .         | intergenic | 0.12         | rs793636148   | 2       |
| AT.AT        | 1          | 16037898 | 16037909 | 6          | .                   | .         | intergenic | -0.133       | 233206 rs7886 | 2       |
| AAAC.GTTT    | 1          | 16043276 | 16043290 | 3.75       | .                   | .         | intergenic | 0.074        | 345834 rs7894 | 2       |
| AAT.ATT      | 1          | 16106484 | 16106503 | 6.66667    | ENSSSCT00000004510  | .         | intron     | 0.052        | rs690406510   | 2       |
| AG.CT        | 1          | 16168442 | 16168455 | 7          | ENSSSCT00000004510  | .         | intron     | -0.009       | 394057 rs7025 | 6       |
| AG.CT        | 1          | 16168442 | 16168455 | 7          | ENSSSCT00000030512  | .         | intron     | -0.009       | 394057 rs7025 | 6       |
| AC.GT        | 1          | 16243125 | 16243136 | 6          | .                   | .         | intergenic | 0.38         | rs699214597   | 3       |
| AAAAC.GTTTT  | 1          | 16407160 | 16407182 | 4.6        | ENSSSCT00000004511  | .         | intron     | -0.279       | 765270 rs7924 | 2       |
| AG.CT        | 1          | 16522300 | 16522309 | 5          | .                   | .         | intergenic | .            | rs793887413   | 2       |
| AT.AT        | 1          | 16954338 | 16954351 | 7          | .                   | .         | intergenic | .            | 129803 rs7864 | 2       |
| AAAAG.CTTTT  | 1          | 17064141 | 17064166 | 4.33333    | .                   | .         | intergenic | -0.014       | 308143 rs7918 | 2       |
| AC.GT        | 1          | 17125793 | 17125812 | 10         | ENSSSCT00000004518  | CCDC170   | intron     | 0.201        | .             | 2       |
| AC.GT        | 1          | 17125793 | 17125812 | 10         | ENSSSCT00000030322  | CCDC170   | intron     | 0.201        | .             | 2       |

|              |   |          |          |         |                    |          |            |        |        |             |   |
|--------------|---|----------|----------|---------|--------------------|----------|------------|--------|--------|-------------|---|
| AAATG.CATTT  | 1 | 17190714 | 17190734 | 4.2     | ENSSSCT00000004519 | C6orf211 | 3'utr      | 0.311  | 174168 | rs7910      | 2 |
| AT.AT        | 1 | 17229949 | 17229964 | 8       | ENSSSCT00000004520 | RMND1    | intron     | 0.058  |        | rs707573049 | 2 |
| AAATG.CATTT  | 1 | 17234709 | 17234727 | 3.8     | ENSSSCT00000004520 | RMND1    | intron     | -0.251 | 171975 | rs7913      | 2 |
| AC.GT        | 1 | 17247561 | 17247570 | 5       | ENSSSCT00000004520 | RMND1    | intron     | -0.021 |        | rs789218113 | 2 |
| AAAC.GTTT    | 1 | 17252969 | 17252987 | 4.75    | ENSSSCT00000004520 | RMND1    | intron     | .      |        | rs790570326 | 2 |
| AAC.GTT      | 1 | 17347418 | 17347431 | 4.66667 | .                  | .        | intergenic | 0.251  |        | rs693832947 | 4 |
| AT.AT        | 1 | 17495488 | 17495500 | 6.5     | .                  | .        | intergenic | -0.187 | 197810 | rs7882      | 2 |
| AC.GT        | 1 | 17796962 | 17796983 | 11      | .                  | .        | intergenic | .      |        | rs790238141 | 2 |
| AAAAAC.GTTTT | 1 | 17915438 | 17915457 | 3.33333 | .                  | .        | intergenic | 0.231  |        | rs792853253 | 2 |
| AC.GT        | 1 | 17916678 | 17916689 | 6       | .                  | .        | intergenic | .      |        | rs790410673 | 2 |
| AAAAT.ATTTT  | 1 | 18035005 | 18035027 | 4.6     | ENSSSCT00000004526 | PPP1R14C | intron     | -0.083 |        | rs790941110 | 2 |
| AAAC.GTTT    | 1 | 18085891 | 18085906 | 4       | .                  | .        | intergenic | -0.096 |        | rs793875210 | 2 |
| AAAT.ATTT    | 1 | 18193220 | 18193234 | 3.75    | .                  | .        | intergenic | .      |        | rs790840692 | 2 |
| AC.GT        | 1 | 18491402 | 18491426 | 12.5    | ENSSSCT00000004536 | LRP11    | intron     | .      | 183637 | rs7053      | 2 |
| AC.GT        | 1 | 18513426 | 18513440 | 7.5     | ENSSSCT00000004536 | LRP11    | intron     | 0.166  |        | rs786633528 | 2 |
| AAAAC.GTTTT  | 1 | 18580440 | 18580468 | 5.8     | ENSSSCT00000004540 | NUP43    | intron     | 0.13   |        | rs792767079 | 2 |
| AAAC.GTTT    | 1 | 18677125 | 18677140 | 4       | ENSSSCT00000023948 | .        | intron     | 4.141  |        | rs787759203 | 2 |
| AAAC.GTTT    | 1 | 18677125 | 18677140 | 4       | ENSSSCT00000024741 | PPIL4    | intron     | 4.141  |        | rs787759203 | 2 |
| AAAAC.GTTTT  | 1 | 19290976 | 19290999 | 4.8     | .                  | .        | intergenic | -0.059 |        | rs787645188 | 2 |
| AAAC.GTTT    | 1 | 19333443 | 19333460 | 4.5     | ENSSSCT00000024450 | .        | intron     | -0.315 |        | .           | 2 |
| AAAT.ATTT    | 1 | 19528921 | 19528945 | 6.25    | .                  | .        | intergenic | 0.109  |        | rs788127697 | 2 |
| AAAC.GTTT    | 1 | 19833214 | 19833239 | 6.5     | .                  | .        | intergenic | .      | 123306 | rs7937      | 2 |
| AAAG.CTTT    | 1 | 20078640 | 20078662 | 5.75    | .                  | .        | intergenic | 0.149  |        | rs788232476 | 2 |
| AT.AT        | 1 | 20307776 | 20307807 | 16      | .                  | .        | intergenic | 0.083  |        | rs787681869 | 2 |
| AAAAT.ATTTT  | 1 | 20409587 | 20409601 | 3       | .                  | .        | intergenic | .      |        | rs788275668 | 2 |
| AAT.ATT      | 1 | 20511284 | 20511298 | 5       | .                  | .        | intergenic | 0.027  |        | .           | 3 |
| AT.AT        | 1 | 20619863 | 20619873 | 5.5     | ENSSSCT00000004548 | .        | intron     | .      |        | rs792095552 | 2 |
| AT.AT        | 1 | 20828987 | 20829001 | 7.5     | .                  | .        | intergenic | .      |        | rs786808095 | 3 |
| AAAT.ATTT    | 1 | 20921656 | 20921684 | 7.25    | .                  | .        | intergenic | -0.034 |        | rs788394548 | 2 |
| AG.CT        | 1 | 21268672 | 21268694 | 11.5    | .                  | .        | intergenic | -0.001 |        | rs792573785 | 2 |
| AAAC.GTTT    | 1 | 21500670 | 21500688 | 4.75    | ENSSSCT00000004554 | GRM1     | intron     | -0.067 |        | rs790826708 | 2 |
| AC.GT        | 1 | 21532888 | 21532920 | 16.5    | ENSSSCT00000004554 | GRM1     | intron     | 0.332  | 390770 | rs7874      | 4 |
| AAAC.GTTT    | 1 | 21542962 | 21542978 | 4.25    | ENSSSCT00000004554 | GRM1     | intron     | .      |        | rs792676375 | 2 |
| AAC.GTT      | 1 | 21700070 | 21700084 | 5       | ENSSSCT00000004554 | GRM1     | intron     | 0.084  |        | rs793139146 | 2 |
| AAAT.ATTT    | 1 | 21742006 | 21742026 | 5.25    | ENSSSCT00000004554 | GRM1     | intron     | 0.206  |        | rs787679935 | 2 |
| AT.AT        | 1 | 21778438 | 21778448 | 5.5     | ENSSSCT00000004554 | GRM1     | intron     | 0.068  |        | .           | 3 |
| AT.AT        | 1 | 21913731 | 21913741 | 5.5     | ENSSSCT00000004555 | SHPRH    | intron     | 0.068  |        | .           | 2 |
| AAC.GTT      | 1 | 21951985 | 21952007 | 7.66667 | .                  | .        | intergenic | .      |        | .           | 2 |
| AAT.ATT      | 1 | 22044955 | 22044969 | 5       | .                  | .        | intergenic | 0.141  |        | rs791863290 | 2 |
| AG.CT        | 1 | 22056323 | 22056338 | 8       | ENSSSCT00000004557 | EPM2A    | intron     | 0.127  |        | rs787195960 | 2 |
| AC.GT        | 1 | 22192928 | 22192940 | 6.5     | .                  | .        | intergenic | 0.006  |        | rs788252448 | 4 |
| AAAC.GTTT    | 1 | 22218097 | 22218121 | 6.25    | .                  | .        | intergenic | .      | 128732 | rs7927      | 2 |
| AAC.GTT      | 1 | 22359082 | 22359100 | 6.33333 | .                  | .        | intergenic | 0.22   |        | rs792767503 | 2 |
| AC.GT        | 1 | 22974449 | 22974468 | 10      | .                  | .        | intergenic | 0.025  | 201761 | rs7892      | 2 |
| AAC.GTT      | 1 | 22985964 | 22985980 | 5.66667 | .                  | .        | intergenic | 0.065  |        | rs789724657 | 2 |
| AT.AT        | 1 | 23021299 | 23021309 | 5.5     | ENSSSCT00000004558 | .        | intron     | 0.086  |        | rs791010547 | 2 |
| AC.GT        | 1 | 23277319 | 23277345 | 13.5    | .                  | .        | intergenic | 0.007  |        | rs787716774 | 2 |
| AC.GT        | 1 | 23456794 | 23456806 | 6.5     | .                  | .        | intergenic | .      |        | rs791239132 | 2 |
| AAAG.CTTT    | 1 | 23476616 | 23476641 | 6.5     | .                  | .        | intergenic | 0.14   | 146967 | rs7874      | 2 |
| AG.CT        | 1 | 24048324 | 24048333 | 5       | .                  | .        | intergenic | .      |        | rs706863033 | 4 |
| AAAAC.GTTTT  | 1 | 24066376 | 24066394 | 3.8     | .                  | .        | intergenic | .      |        | .           | 2 |
| AT.AT        | 1 | 24086598 | 24086612 | 7.5     | .                  | .        | intergenic | 0.202  | 326209 | rs7902      | 2 |
| AAAC.GTTT    | 1 | 24454377 | 24454397 | 5.25    | .                  | .        | intergenic | -0.157 |        | rs788971360 | 2 |
| AT.AT        | 1 | 24457904 | 24457924 | 10.5    | .                  | .        | intergenic | -0.039 |        | rs790840906 | 2 |
| AAAC.GTTT    | 1 | 25210781 | 25210795 | 3.75    | .                  | .        | intergenic | 0.084  |        | rs788312525 | 2 |
| AAT.ATT      | 1 | 25572131 | 25572151 | 7       | .                  | .        | intergenic | -0.01  |        | rs788738300 | 2 |
| AAAT.ATTT    | 1 | 25814878 | 25814895 | 4.5     | ENSSSCT00000004576 | NMBR     | intron     | -0.043 |        | .           | 2 |
| AC.GT        | 1 | 26089473 | 26089501 | 14.5    | .                  | .        | intergenic | .      |        | rs793098374 | 2 |
| AC.GT        | 1 | 26292786 | 26292796 | 5.5     | .                  | .        | intergenic | 0.172  |        | .           | 2 |
| AC.GT        | 1 | 26440793 | 26440805 | 6.5     | .                  | .        | intergenic | -0.099 | 338694 | rs7912      | 2 |
| AAAG.CTTT    | 1 | 26610706 | 26610724 | 4.75    | .                  | .        | intergenic | -0.02  |        | rs789844007 | 2 |
| AT.AT        | 1 | 26832123 | 26832132 | 5       | .                  | .        | intergenic | 0.115  |        | .           | 2 |
| AT.AT        | 1 | 26958549 | 26958582 | 17      | .                  | .        | intergenic | 0.067  | 143435 | rs7882      | 2 |
| AAC.GTT      | 1 | 27308104 | 27308123 | 6.66667 | .                  | .        | intergenic | 0.022  |        | .           | 3 |
| AG.CT        | 1 | 27348221 | 27348231 | 5.5     | .                  | .        | intergenic | 0.09   | 177742 | rs7875      | 3 |
| AT.AT        | 1 | 27376830 | 27376847 | 9       | .                  | .        | intergenic | -0.256 |        | rs786224763 | 2 |
| AAAC.GTTT    | 1 | 27580717 | 27580745 | 7.25    | .                  | .        | intergenic | -0.137 |        | rs788389829 | 3 |
| AC.GT        | 1 | 27604864 | 27604877 | 7       | .                  | .        | intergenic | 1.286  | 266483 | rs7868      | 2 |
| AG.CT        | 1 | 27705511 | 27705521 | 5.5     | .                  | .        | intergenic | -0.118 |        | .           | 2 |
| AT.AT        | 1 | 27835615 | 27835624 | 5       | .                  | .        | intergenic | 0.056  |        | rs787806904 | 2 |
| AG.CT        | 1 | 27871328 | 27871337 | 5       | .                  | .        | intergenic | 0.207  |        | rs789872320 | 2 |
| AAG.CTT      | 1 | 27881079 | 27881096 | 6       | .                  | .        | intergenic | 0.174  | 388913 | rs7901      | 2 |
| ATC.GAT      | 1 | 28304800 | 28304821 | 7.33333 | .                  | .        | intergenic | -0.022 |        | rs693039343 | 2 |
| AAG.CTT      | 1 | 28727401 | 28727418 | 6       | ENSSSCT00000004583 | ECT2L    | intron     | -0.067 | 346615 | rs7900      | 2 |
| AAG.CTT      | 1 | 28727401 | 28727418 | 6       | ENSSSCT00000023305 | ECT2L    | intron     | -0.067 | 346615 | rs7900      | 2 |
| AAAC.GTTT    | 1 | 28767210 | 28767228 | 4.75    | ENSSSCT00000004583 | ECT2L    | promoter   | 0.057  |        | rs787937088 | 2 |
| AT.AT        | 1 | 28773510 | 28773536 | 13.5    | .                  | .        | intergenic | 0.003  | 384548 | rs7876      | 4 |
| AAAC.GTTT    | 1 | 28894274 | 28894292 | 4.75    | ENSSSCT00000004585 | NHSL1    | intron     | 0.196  | 740607 | rs7890      | 4 |
| AGC.GCT      | 1 | 28948150 | 28948167 | 6       | ENSSSCT00000004585 | NHSL1    | intron     | -0.389 | 387813 | rs7880      | 2 |
| AC.GT        | 1 | 29013044 | 29013054 | 5.5     | ENSSSCT00000004585 | NHSL1    | intron     | 0.189  |        | rs791549308 | 2 |
| AAAT.ATTT    | 1 | 29034708 | 29034731 | 6       | ENSSSCT00000004585 | NHSL1    | intron     | 0.028  | 798660 | rs7879      | 2 |
| AAAG.CTTT    | 1 | 29084804 | 29084831 | 7       | ENSSSCT00000004585 | NHSL1    | intron     | .      | 235900 | rs7876      | 2 |
| AT.AT        | 1 | 29087476 | 29087513 | 19      | ENSSSCT00000004585 | NHSL1    | intron     | 0.154  |        | rs787786393 | 2 |
| AAC.GTT      | 1 | 29097477 | 29097490 | 4.66667 | ENSSSCT00000004585 | NHSL1    | intron     | 0.172  |        | rs792277197 | 2 |

|              |   |          |          |         |                    |         |            |        |               |   |
|--------------|---|----------|----------|---------|--------------------|---------|------------|--------|---------------|---|
| AGAT.ATCT    | 1 | 29519836 | 29519854 | 4.75    | .                  | .       | intergenic | .      | .             | 2 |
| AAT.ATT      | 1 | 29698715 | 29698731 | 5.66667 | .                  | .       | intergenic | -0.136 | .             | 3 |
| AG.CT        | 1 | 29745805 | 29745818 | 7       | .                  | .       | intergenic | -0.162 | rs791800352   | 2 |
| AT.AT        | 1 | 29812304 | 29812316 | 6.5     | .                  | .       | intergenic | -0.048 | rs786479551   | 2 |
| AG.CT        | 1 | 30174340 | 30174354 | 7.5     | .                  | .       | intergenic | -0.036 | .             | 3 |
| AG.CT        | 1 | 30200631 | 30200649 | 9.5     | .                  | .       | intergenic | -0.103 | rs792468410   | 3 |
| AT.AT        | 1 | 30447306 | 30447320 | 7.5     | .                  | .       | intergenic | .      | 303564 rs7927 | 2 |
| AAT.ATT      | 1 | 30811903 | 30811919 | 5.66667 | ENSSSCT00000025418 | .       | intron     | 0.346  | rs789892211   | 2 |
| AAT.ATT      | 1 | 30811903 | 30811919 | 5.66667 | ENSSSCT00000034480 | MAP3K5  | intron     | 0.346  | rs789892211   | 2 |
| AAC.GTT      | 1 | 30900483 | 30900497 | 5       | ENSSSCT00000025418 | .       | intron     | .      | 378393 rs7932 | 2 |
| AAAT.ATTT    | 1 | 31006824 | 31006839 | 4       | ENSSSCT00000025418 | .       | intron     | 0.311  | rs789938523   | 2 |
| AAC.GTT      | 1 | 31039621 | 31039637 | 5.66667 | .                  | .       | intergenic | 0.264  | rs791577097   | 2 |
| AG.CT        | 1 | 31105306 | 31105316 | 5.5     | .                  | .       | intergenic | -0.162 | 385323 rs7882 | 2 |
| AAAC.GTTT    | 1 | 31191487 | 31191507 | 5.25    | .                  | .       | intergenic | 0.033  | rs786286157   | 2 |
| AC.GT        | 1 | 31295451 | 31295462 | 6       | .                  | .       | intergenic | .      | rs695309575   | 2 |
| AC.GT        | 1 | 31461209 | 31461221 | 6.5     | .                  | .       | intergenic | 0.318  | rs792518567   | 3 |
| AC.GT        | 1 | 31466850 | 31466862 | 6.5     | .                  | .       | intergenic | 0.004  | rs691964012   | 2 |
| AAAAT.ATTTT  | 1 | 31617834 | 31617851 | 3.6     | .                  | .       | intergenic | 0.172  | rs791663684   | 3 |
| AC.GT        | 1 | 31631155 | 31631167 | 6.5     | .                  | .       | intergenic | 0.096  | .             | 3 |
| AAAG.CTTT    | 1 | 31803525 | 31803551 | 6.75    | .                  | .       | intergenic | 0.468  | 794696 rs7910 | 3 |
| AAAG.CTTT    | 1 | 31826720 | 31826734 | 3.75    | .                  | .       | intergenic | 0.184  | rs792727813   | 2 |
| AC.GT        | 1 | 31939315 | 31939329 | 7.5     | .                  | .       | intergenic | 0.184  | rs793539951   | 2 |
| AG.CT        | 1 | 31964740 | 31964755 | 8       | .                  | .       | intergenic | 0.095  | 169178 rs7872 | 2 |
| AT.AT        | 1 | 32037086 | 32037097 | 6       | .                  | .       | intergenic | 0.065  | rs791285537   | 3 |
| AAAT.ATTT    | 1 | 32360390 | 32360412 | 5.75    | .                  | .       | intergenic | 0.16   | .             | 2 |
| AAAT.ATTT    | 1 | 32402539 | 32402555 | 4.25    | .                  | .       | intergenic | 0.307  | rs792721706   | 2 |
| AC.GT        | 1 | 32483080 | 32483096 | 8.5     | ENSSSCT00000004608 | HBS1L   | intron     | 0.1    | .             | 3 |
| AAAC.GTTT    | 1 | 32554196 | 32554222 | 6.75    | ENSSSCT00000029261 | .       | intron     | -0.018 | rs788908377   | 2 |
| AT.AT        | 1 | 32870857 | 32870866 | 5       | .                  | .       | intergenic | 0.022  | rs789465370   | 2 |
| AC.GT        | 1 | 32938888 | 32938907 | 10      | .                  | .       | intergenic | 0.109  | rs793587743   | 2 |
| AG.CT        | 1 | 32972569 | 32972579 | 5.5     | .                  | .       | intergenic | .      | rs789858920   | 2 |
| AC.GT        | 1 | 33044810 | 33044822 | 6.5     | .                  | .       | intergenic | .      | rs789977224   | 2 |
| AAC.GTT      | 1 | 33103392 | 33103420 | 9.66667 | .                  | .       | intergenic | 0.129  | rs696764037   | 2 |
| AC.GT        | 1 | 33238752 | 33238762 | 5.5     | .                  | .       | intergenic | .      | 355231 rs7924 | 3 |
| AG.CT        | 1 | 33355327 | 33355337 | 5.5     | ENSSSCT00000004611 | SLC2A12 | intron     | 0.165  | 300187 rs7894 | 3 |
| AT.AT        | 1 | 33448520 | 33448531 | 6       | .                  | .       | intergenic | 0.082  | 366407 rs6963 | 3 |
| AAAAC.GTTTT  | 1 | 33663032 | 33663074 | 8.6     | .                  | .       | intergenic | 0.122  | rs692570749   | 2 |
| AAAAC.GTTTT  | 1 | 33690056 | 33690076 | 4.2     | .                  | .       | intergenic | 0.193  | 180519 rs7879 | 2 |
| AT.AT        | 1 | 33975908 | 33975918 | 5.5     | .                  | .       | intergenic | 0.025  | rs787694904   | 2 |
| AC.GT        | 1 | 34001299 | 34001311 | 6.5     | .                  | .       | intergenic | -0.218 | rs702970519   | 2 |
| AAC.GTT      | 1 | 34169566 | 34169580 | 5       | .                  | .       | intergenic | 0.747  | rs792874633   | 2 |
| AAC.GTT      | 1 | 34244945 | 34244968 | 8       | .                  | .       | intergenic | .      | rs791734867   | 2 |
| AAAG.CTTT    | 1 | 34361506 | 34361523 | 4.5     | .                  | .       | intergenic | 0.028  | .             | 2 |
| AAAAC.GTTTT  | 1 | 34703924 | 34703943 | 3.33333 | ENSSSCT00000004629 | STX7    | promoter   | .      | rs786759960   | 2 |
| AAAAC.GTTTT  | 1 | 34917240 | 34917259 | 4       | .                  | .       | intergenic | 0.136  | rs791576210   | 2 |
| AG.CT        | 1 | 35014407 | 35014428 | 11      | .                  | .       | intergenic | 0.098  | .             | 2 |
| AC.GT        | 1 | 35037599 | 35037612 | 7       | .                  | .       | intergenic | -0.124 | rs790592337   | 2 |
| AG.CT        | 1 | 35604637 | 35604648 | 6       | .                  | .       | intergenic | .      | rs788086882   | 2 |
| AAAAT.ATTTT  | 1 | 35707441 | 35707460 | 4       | .                  | .       | intergenic | -0.028 | rs790491269   | 2 |
| AC.GT        | 1 | 35781903 | 35781938 | 18      | .                  | .       | intergenic | 0.204  | .             | 3 |
| AC.GT        | 1 | 36220332 | 36220344 | 6.5     | .                  | .       | intergenic | 0.205  | 780242 rs7893 | 2 |
| AC.GT        | 1 | 36257153 | 36257185 | 16.5    | .                  | .       | intergenic | 0.04   | rs791413266   | 2 |
| AG.CT        | 1 | 36387088 | 36387100 | 6.5     | .                  | .       | intergenic | .      | 396972 rs7933 | 4 |
| AAAC.GTTT    | 1 | 36418105 | 36418122 | 4.5     | .                  | .       | intergenic | 0.432  | rs792313104   | 2 |
| ACCC.GGGT    | 1 | 36499250 | 36499264 | 3.75    | .                  | .       | intergenic | -0.137 | rs792523257   | 2 |
| ACATAT.ATATG | 1 | 36577899 | 36577927 | 4.83333 | .                  | .       | intergenic | 0.06   | rs789959299   | 2 |
| AAT.ATT      | 1 | 36779877 | 36779900 | 8       | .                  | .       | intergenic | .      | rs790741775   | 2 |
| AG.CT        | 1 | 36914123 | 36914133 | 5.5     | .                  | .       | intergenic | -0.196 | .             | 2 |
| AG.CT        | 1 | 36951166 | 36951175 | 5       | .                  | .       | intergenic | -0.134 | .             | 2 |
| AG.CT        | 1 | 36972239 | 36972248 | 5       | .                  | .       | intergenic | 0.419  | 388982 rs7881 | 2 |
| AAAC.GTTT    | 1 | 36998013 | 36998048 | 9       | .                  | .       | intergenic | .      | rs790793036   | 3 |
| AT.AT        | 1 | 37114618 | 37114644 | 13.5    | ENSSSCT00000004646 | .       | intron     | -0.136 | .             | 4 |
| AAAAT.ATTTT  | 1 | 37126147 | 37126168 | 3.66667 | ENSSSCT00000004646 | .       | intron     | 0.187  | 716399 rs7911 | 2 |
| AC.GT        | 1 | 37469021 | 37469044 | 12      | ENSSSCT00000004648 | .       | intron     | 0.054  | rs789237962   | 2 |
| AC.GT        | 1 | 37501715 | 37501725 | 5.5     | ENSSSCT00000004648 | .       | intron     | 0.093  | rs789994649   | 2 |
| AC.GT        | 1 | 37979270 | 37979294 | 12.5    | .                  | .       | intergenic | .      | rs790658527   | 2 |
| ACCT.AGGT    | 1 | 38408590 | 38408616 | 6.75    | ENSSSCT00000004650 | PTPRK   | intron     | 0.519  | rs793397346   | 2 |
| AAAAG.CTTT   | 1 | 38665448 | 38665488 | 8.2     | ENSSSCT00000004650 | PTPRK   | intron     | 0.057  | rs698167926   | 2 |
| AT.AT        | 1 | 38668295 | 38668306 | 6       | ENSSSCT00000004650 | PTPRK   | intron     | .      | rs789406737   | 2 |
| AAAC.GTTT    | 1 | 38694394 | 38694430 | 9.25    | ENSSSCT00000004650 | PTPRK   | intron     | 0.038  | rs793156035   | 2 |
| AT.AT        | 1 | 38731088 | 38731102 | 7.5     | ENSSSCT00000004650 | PTPRK   | intron     | -0.038 | rs789238536   | 2 |
| AAAAT.ATTTT  | 1 | 38790209 | 38790238 | 6       | ENSSSCT00000004650 | PTPRK   | intron     | 4.065  | rs792994735   | 2 |
| AAAC.GTTT    | 1 | 38790423 | 38790444 | 5.5     | ENSSSCT00000004650 | PTPRK   | intron     | 3.643  | .             | 2 |
| AC.GT        | 1 | 39040859 | 39040885 | 13.5    | .                  | .       | intergenic | 0.018  | rs787402741   | 2 |
| AAAT.ATTT    | 1 | 39292573 | 39292588 | 4       | .                  | .       | intergenic | .      | 103547 rs7880 | 2 |
| AG.CT        | 1 | 39425336 | 39425353 | 9       | ENSSSCT00000004657 | .       | intron     | 0.027  | 394044 rs7869 | 2 |
| AT.AT        | 1 | 39625199 | 39625213 | 7.5     | .                  | .       | intergenic | 0.16   | rs786232848   | 4 |
| AATT.AATT    | 1 | 39838847 | 39838872 | 6.5     | .                  | .       | intergenic | -0.046 | rs793138401   | 2 |
| AC.GT        | 1 | 39847813 | 39847843 | 15.5    | .                  | .       | intergenic | 0.16   | rs790933277   | 3 |
| AAAT.ATTT    | 1 | 39872694 | 39872717 | 6       | .                  | .       | intergenic | 0.095  | rs792178259   | 2 |
| AAT.ATT      | 1 | 39873337 | 39873368 | 10.6667 | .                  | .       | intergenic | 0.127  | rs789883712   | 2 |
| AT.AT        | 1 | 40017272 | 40017297 | 13      | .                  | .       | intergenic | 0.172  | 127596 rs7938 | 2 |
| AAC.GTT      | 1 | 40201536 | 40201555 | 6.66667 | .                  | .       | intergenic | 0.128  | rs786287949   | 2 |
| AAAAC.GTTTT  | 1 | 40218686 | 40218710 | 5       | .                  | .       | intergenic | .      | rs792066293   | 2 |

|             |   |          |          |         |                    |         |            |        |               |   |
|-------------|---|----------|----------|---------|--------------------|---------|------------|--------|---------------|---|
| AAAAC.GTTTT | 1 | 40581538 | 40581566 | 5.8     | .                  | .       | intergenic | -0.154 | rs791198671   | 2 |
| AC.GT       | 1 | 40607227 | 40607241 | 7.5     | .                  | .       | intergenic | -0.028 | rs792296636   | 3 |
| AC.GT       | 1 | 40934783 | 40934801 | 9.5     | ENSSSCT00000027938 | NCOA7   | intron     | -0.106 | rs791588396   | 2 |
| ACTCT.AGAGT | 1 | 41026982 | 41026996 | 3       | .                  | .       | intergenic | 0.193  | rs789251351   | 3 |
| AAAC.GTTT   | 1 | 41479169 | 41479192 | 6       | .                  | .       | intergenic | -0.083 | rs789018301   | 2 |
| AC.GT       | 1 | 42040798 | 42040807 | 5       | .                  | .       | intergenic | 0.247  | rs793294116   | 2 |
| AC.GT       | 1 | 42327669 | 42327679 | 5.5     | .                  | .       | intergenic | -0.124 | rs792718851   | 2 |
| AAC.GTT     | 1 | 42448247 | 42448260 | 4.66667 | .                  | .       | intergenic | 0.71   | rs791578037   | 2 |
| AAAAC.ATTTT | 1 | 42714130 | 42714146 | 3.4     | .                  | .       | intergenic | 0.105  | rs792758029   | 2 |
| AAAC.GTTT   | 1 | 42874049 | 42874063 | 3.75    | .                  | .       | intergenic | -0.005 | rs789692543   | 2 |
| ACGC.GCGT   | 1 | 42938175 | 42938193 | 4.75    | .                  | .       | intergenic | -0.18  | rs792144167   | 2 |
| AT.AT       | 1 | 42958453 | 42958462 | 5       | .                  | .       | intergenic | -0.179 | rs790256328   | 2 |
| AAT.ATT     | 1 | 43186991 | 43187014 | 8       | .                  | .       | intergenic | -0.08  | .             | 2 |
| AG.CT       | 1 | 43275152 | 43275161 | 5       | .                  | .       | intergenic | 0.275  | rs793015065   | 2 |
| AAAC.GTTT   | 1 | 43297277 | 43297303 | 6.75    | .                  | .       | intergenic | 0.192  | rs791827495   | 2 |
| AC.GT       | 1 | 43466116 | 43466134 | 9.5     | .                  | .       | intergenic | 0.531  | 183380 rs7876 | 2 |
| AAT.ATT     | 1 | 43502935 | 43502948 | 4.66667 | ENSSSCT00000029492 | TRDN    | intron     | -0.221 | .             | 2 |
| AC.GT       | 1 | 43566732 | 43566744 | 6.5     | .                  | .       | intergenic | -0.131 | rs790494770   | 2 |
| AC.GT       | 1 | 43616051 | 43616071 | 10.5    | .                  | .       | intergenic | -0.144 | rs787543403   | 2 |
| AAAT.ATTT   | 1 | 43697562 | 43697579 | 4.5     | .                  | .       | intergenic | .      | rs791628028   | 2 |
| AAAAG.CTTTT | 1 | 43932329 | 43932353 | 5       | ENSSSCT00000004677 | CLVS2   | intron     | -0.009 | 167133 rs7894 | 2 |
| AC.GT       | 1 | 43937111 | 43937124 | 7       | ENSSSCT00000004677 | CLVS2   | intron     | 0.044  | .             | 3 |
| AAC.GTT     | 1 | 43974992 | 43975005 | 4.66667 | ENSSSCT00000004677 | CLVS2   | intron     | 0.139  | rs791614704   | 2 |
| AAT.ATT     | 1 | 44089536 | 44089552 | 5.66667 | ENSSSCT00000033012 | SMPDL3A | intron     | -0.154 | rs788892991   | 2 |
| AAT.ATT     | 1 | 44089536 | 44089552 | 5.66667 | ENSSSCT00000034434 | SMPDL3A | intron     | -0.154 | rs788892991   | 2 |
| AAT.ATT     | 1 | 44089536 | 44089552 | 5.66667 | ENSSSCT00000004678 | SMPDL3A | intron     | -0.154 | rs788892991   | 2 |
| AAAC.GTTT   | 1 | 44159818 | 44159848 | 7.75    | .                  | .       | intergenic | .      | rs789277234   | 2 |
| AAAC.GTTT   | 1 | 44171450 | 44171472 | 5.75    | .                  | .       | intergenic | 0.08   | rs786973217   | 2 |
| AG.CT       | 1 | 44736625 | 44736654 | 15      | .                  | .       | intergenic | -0.029 | 322824 rs7867 | 2 |
| AC.GT       | 1 | 45030265 | 45030278 | 7       | .                  | .       | intergenic | -0.049 | rs793291164   | 2 |
| AAAT.ATTT   | 1 | 45163763 | 45163786 | 6       | .                  | .       | intergenic | -0.062 | 71294 rs7906  | 2 |
| AAAC.GTTT   | 1 | 45175722 | 45175740 | 4.75    | .                  | .       | intergenic | 0.125  | rs788602046   | 2 |
| AT.AT       | 1 | 45222384 | 45222406 | 11.5    | .                  | .       | intergenic | 0.009  | rs788705357   | 2 |
| AAC.GTT     | 1 | 45252182 | 45252196 | 5       | .                  | .       | intergenic | 0.138  | rs786255226   | 2 |
| AAAC.GTTT   | 1 | 45333005 | 45333018 | 3.5     | .                  | .       | intergenic | 0.03   | rs787514789   | 2 |
| AATT.AATT   | 1 | 45433128 | 45433149 | 5.5     | .                  | .       | intergenic | -0.015 | rs789200495   | 2 |
| AG.CT       | 1 | 45499676 | 45499688 | 6.5     | .                  | .       | intergenic | 1.35   | .             | 2 |
| AAAT.ATTT   | 1 | 45739199 | 45739213 | 3.75    | ENSSSCT00000004689 | TBC1D32 | intron     | .      | rs788758978   | 2 |
| AAAC.GTTT   | 1 | 45784509 | 45784555 | 11.75   | ENSSSCT00000004689 | TBC1D32 | intron     | 0.099  | rs788627854   | 2 |
| AT.AT       | 1 | 45792245 | 45792260 | 8       | ENSSSCT00000004689 | TBC1D32 | intron     | .      | rs788964391   | 2 |
| AAAT.ATTT   | 1 | 45807102 | 45807128 | 6.75    | ENSSSCT00000004689 | TBC1D32 | intron     | .      | rs792553793   | 2 |
| AG.CT       | 1 | 45981913 | 45981925 | 6.5     | .                  | .       | intergenic | 0.369  | .             | 4 |
| AAC.GTT     | 1 | 45990524 | 45990539 | 5.33333 | .                  | .       | intergenic | 0.068  | 230982 rs7875 | 2 |
| AT.AT       | 1 | 46224422 | 46224432 | 5.5     | .                  | .       | intergenic | 0.03   | rs791374551   | 2 |
| AAC.GTT     | 1 | 46480135 | 46480157 | 7.66667 | .                  | .       | intergenic | .      | rs792875546   | 2 |
| AC.GT       | 1 | 47167554 | 47167565 | 6       | .                  | .       | intergenic | 0.055  | .             | 3 |
| AAAT.ATTT   | 1 | 47340700 | 47340716 | 4.25    | .                  | .       | intergenic | -0.033 | 331314 rs7915 | 2 |
| AAAC.GTTT   | 1 | 47406087 | 47406113 | 6.75    | .                  | .       | intergenic | -0.127 | 367789 rs7884 | 4 |
| AAC.GTT     | 1 | 47496552 | 47496570 | 6.33333 | .                  | .       | intergenic | 0.08   | 350954 rs7938 | 2 |
| AAAAC.GTTTT | 1 | 47984615 | 47984632 | 3.6     | ENSSSCT00000004691 | MAN1A1  | intron     | 0.031  | .             | 2 |
| AG.CT       | 1 | 48202205 | 48202235 | 15.5    | ENSSSCT00000004692 | FAM184A | intron     | 0.123  | 125083 rs7919 | 2 |
| AT.AT       | 1 | 48281554 | 48281564 | 5.5     | .                  | .       | intergenic | .      | rs793280148   | 2 |
| AAAC.GTTT   | 1 | 48333168 | 48333186 | 4.75    | ENSSSCT00000004693 | MCM9    | intron     | 0.134  | 259831 rs7932 | 3 |
| AAAC.GTTT   | 1 | 48592701 | 48592720 | 5       | .                  | .       | intergenic | 0.285  | rs787781254   | 2 |
| AAG.CTT     | 1 | 48819457 | 48819473 | 5.66667 | .                  | .       | intergenic | 0.182  | 171355 rs7934 | 2 |
| AATG.CATT   | 1 | 48984816 | 48984847 | 8       | ENSSSCT00000004697 | SLC35F1 | intron     | -0.049 | rs793239753   | 2 |
| AAAAC.GTTTT | 1 | 49028360 | 49028377 | 3.6     | ENSSSCT00000004697 | SLC35F1 | intron     | -0.14  | rs793206570   | 2 |
| AAAAC.GTTTT | 1 | 49257643 | 49257666 | 4.8     | .                  | .       | intergenic | 0.267  | rs789687289   | 2 |
| AC.GT       | 1 | 49312173 | 49312188 | 8       | .                  | .       | intergenic | 0.763  | 300714 rs7929 | 2 |
| AT.AT       | 1 | 49540762 | 49540776 | 7.5     | .                  | .       | intergenic | .      | rs792540454   | 4 |
| AATAC.GTATT | 1 | 49565727 | 49565755 | 5.8     | ENSSSCT00000004699 | .       | intron     | 0.192  | rs786871772   | 2 |
| AT.AT       | 1 | 49591149 | 49591158 | 5       | ENSSSCT00000004701 | GOPC    | intron     | 0.027  | rs791762296   | 2 |
| AAAG.CTTT   | 1 | 49594084 | 49594097 | 3.5     | ENSSSCT00000004701 | GOPC    | intron     | .      | rs788965010   | 2 |
| AAAAC.GTTTT | 1 | 49723035 | 49723052 | 3.6     | .                  | .       | intergenic | .      | 731484 rs7863 | 2 |
| AAC.GTT     | 1 | 49781713 | 49781736 | 8       | ENSSSCT00000029401 | ROS1    | intron     | 1.769  | rs793825776   | 2 |
| AT.AT       | 1 | 49814565 | 49814591 | 13.5    | ENSSSCT00000029401 | ROS1    | intron     | 0.236  | 299273 rs7930 | 2 |
| AG.CT       | 1 | 49816006 | 49816016 | 5.5     | ENSSSCT00000029401 | ROS1    | intron     | -0.052 | rs791713439   | 3 |
| AG.CT       | 1 | 49821229 | 49821241 | 6.5     | ENSSSCT00000029401 | ROS1    | intron     | 0.072  | 792624 rs7867 | 2 |
| AAT.ATT     | 1 | 49881944 | 49881973 | 10      | ENSSSCT00000004703 | VGLL2   | intron     | 0.237  | 270292 rs7912 | 2 |
| AAAC.GTTT   | 1 | 50031303 | 50031325 | 5.75    | .                  | .       | intergenic | 0.393  | rs792271105   | 2 |
| AT.AT       | 1 | 50090476 | 50090496 | 10.5    | .                  | .       | intergenic | 0.009  | rs789890725   | 2 |
| AT.AT       | 1 | 50112443 | 50112457 | 7.5     | .                  | .       | intergenic | .      | rs792997640   | 2 |
| AAC.GTT     | 1 | 50965905 | 50965928 | 8       | .                  | .       | intergenic | 0.115  | 118470 rs7937 | 3 |
| AT.AT       | 1 | 51030264 | 51030275 | 6       | .                  | .       | intergenic | -0.286 | .             | 2 |
| AAC.GTT     | 1 | 51415020 | 51415035 | 5.33333 | .                  | .       | intergenic | -0.112 | rs787793039   | 2 |
| AAAT.ATTT   | 1 | 51490970 | 51490987 | 4.5     | .                  | .       | intergenic | .      | rs790714614   | 2 |
| AAAC.GTTT   | 1 | 51535089 | 51535103 | 3.75    | .                  | .       | intergenic | -0.25  | rs787218245   | 2 |
| AT.AT       | 1 | 51568236 | 51568249 | 7       | .                  | .       | intergenic | 0.066  | 326012 rs7891 | 2 |
| AC.GT       | 1 | 51820026 | 51820040 | 7.5     | .                  | .       | intergenic | .      | rs787905262   | 2 |
| AT.AT       | 1 | 51998574 | 51998585 | 6       | .                  | .       | intergenic | .      | rs789870168   | 3 |
| AAAAT.ATTTT | 1 | 52085844 | 52085865 | 4.4     | .                  | .       | intergenic | -0.016 | 278586 rs7906 | 2 |
| AAAC.GTTT   | 1 | 52148276 | 52148290 | 3.75    | .                  | .       | intergenic | -0.063 | rs788204617   | 2 |
| AC.GT       | 1 | 52149954 | 52149972 | 9.5     | .                  | .       | intergenic | -0.078 | .             | 4 |
| AAAC.GTTT   | 1 | 52418691 | 52418717 | 6.75    | .                  | .       | intergenic | 0.499  | rs788152693   | 2 |

|             |   |          |          |         |                    |          |            |        |                   |   |
|-------------|---|----------|----------|---------|--------------------|----------|------------|--------|-------------------|---|
| AG.CT       | 1 | 52433160 | 52433172 | 6.5     | .                  | .        | intergenic | 0.241  | rs792664890       | 4 |
| AAAC.GTTT   | 1 | 52521132 | 52521150 | 4.75    | .                  | .        | intergenic | 0.037  | rs786645131       | 2 |
| AT.AT       | 1 | 52602233 | 52602244 | 6       | .                  | .        | intergenic | -0.011 | .                 | 3 |
| AC.GT       | 1 | 52609675 | 52609687 | 6.5     | .                  | .        | intergenic | 0.272  | rs787436227       | 4 |
| AG.CT       | 1 | 52809987 | 52810009 | 11.5    | .                  | .        | intergenic | .      | rs792994759       | 2 |
| AAAT.ATTT   | 1 | 52961824 | 52961844 | 5.25    | .                  | .        | intergenic | .      | .                 | 2 |
| AAAT.ATTT   | 1 | 52981958 | 52982001 | 11      | .                  | .        | intergenic | -0.151 | rs786384731       | 2 |
| AAT.ATT     | 1 | 53063505 | 53063531 | 9       | .                  | .        | intergenic | .      | rs792150368       | 2 |
| AAAT.ATTT   | 1 | 53152663 | 53152679 | 4.25    | .                  | .        | intergenic | .      | rs791317766       | 2 |
| AG.CT       | 1 | 53411464 | 53411473 | 5       | .                  | .        | intergenic | .      | .                 | 3 |
| AAGG.CCTT   | 1 | 53665506 | 53665521 | 4       | .                  | .        | intergenic | -0.053 | rs693352739       | 2 |
| AAC.GTT     | 1 | 54007386 | 54007401 | 5.33333 | .                  | .        | intergenic | .      | rs791944749       | 2 |
| AT.AT       | 1 | 54125420 | 54125431 | 6       | .                  | .        | intergenic | -0.046 | rs80604 rs7871    | 2 |
| AT.AT       | 1 | 54756818 | 54756829 | 6       | .                  | .        | intergenic | 0.213  | rs790436411       | 2 |
| AAAAC.GTTTT | 1 | 54766526 | 54766545 | 4       | .                  | .        | intergenic | .      | rs792297 rs7901   | 2 |
| AC.GT       | 1 | 54829662 | 54829675 | 7       | .                  | .        | intergenic | .      | .                 | 3 |
| AAAC.GTTT   | 1 | 54853395 | 54853407 | 3.25    | .                  | .        | intergenic | .      | rs787786107       | 3 |
| AAAT.ATTT   | 1 | 55042066 | 55042088 | 5.75    | .                  | .        | intergenic | .      | rs786786479       | 2 |
| AG.CT       | 1 | 55068231 | 55068243 | 6.5     | .                  | .        | intergenic | 0.284  | .                 | 3 |
| AT.AT       | 1 | 55088385 | 55088394 | 5       | .                  | .        | intergenic | -0.109 | rs788165428       | 2 |
| AT.AT       | 1 | 55292363 | 55292372 | 5       | .                  | .        | intergenic | 0.05   | rs789434919       | 2 |
| AT.AT       | 1 | 55388423 | 55388435 | 6.5     | ENSSSCT00000004719 | BAI3     | intron     | 0.021  | rs788590703       | 2 |
| AAAC.GTTT   | 1 | 55419931 | 55419949 | 4.75    | ENSSSCT00000004719 | BAI3     | intron     | .      | rs789873526       | 2 |
| AT.AT       | 1 | 55557246 | 55557257 | 6       | ENSSSCT00000004719 | BAI3     | intron     | .      | rs793585 rs7936   | 2 |
| AAAAC.GTTTT | 1 | 55674261 | 55674289 | 5.8     | ENSSSCT00000004719 | BAI3     | intron     | -0.037 | rs788855722       | 2 |
| AAC.GTT     | 1 | 55842785 | 55842797 | 4.33333 | .                  | .        | intergenic | .      | rs793884080       | 2 |
| AT.AT       | 1 | 55949280 | 55949296 | 8.5     | .                  | .        | intergenic | 0.08   | rs787560591       | 2 |
| AAAC.GTTT   | 1 | 55978380 | 55978406 | 6.75    | .                  | .        | intergenic | 0.11   | rs790761851       | 2 |
| AAAAC.GTTTT | 1 | 56065330 | 56065352 | 3.83333 | ENSSSCT00000004721 | LMBRD1   | intron     | 0.066  | rs790238799       | 2 |
| AG.CT       | 1 | 56322836 | 56322859 | 12      | ENSSSCT00000004722 | COL19A1  | intron     | 0.017  | rs790666988       | 2 |
| AAAAC.GTTTT | 1 | 56766781 | 56766802 | 4.4     | ENSSSCT00000004723 | COL9A1   | intron     | 0.301  | rs786217443       | 2 |
| AT.AT       | 1 | 56835837 | 56835846 | 5       | .                  | .        | intergenic | 0.153  | .                 | 3 |
| AATAG.CTATT | 1 | 57020516 | 57020535 | 3.33333 | .                  | .        | intergenic | 0.086  | rs786972921       | 2 |
| AT.AT       | 1 | 57284988 | 57284997 | 5       | ENSSSCT00000024170 | B3GAT2   | intron     | .      | .                 | 2 |
| AAAC.GTTT   | 1 | 57345496 | 57345518 | 5.75    | ENSSSCT00000024170 | B3GAT2   | intron     | .      | rs791689238       | 2 |
| ACAT.ATGT   | 1 | 57388624 | 57388644 | 5.25    | .                  | .        | intergenic | .      | rs789294864       | 2 |
| AAAAT.ATTTT | 1 | 57394415 | 57394430 | 3.2     | .                  | .        | intergenic | .      | rs789500911       | 2 |
| AC.GT       | 1 | 57576736 | 57576746 | 5.5     | .                  | .        | intergenic | 0.214  | rs793791655       | 2 |
| AAT.ATT     | 1 | 57619904 | 57619922 | 6.33333 | .                  | .        | intergenic | .      | rs789518475       | 2 |
| ATC.GAT     | 1 | 57823485 | 57823505 | 7       | .                  | .        | intergenic | -0.005 | rs787917129       | 2 |
| AG.CT       | 1 | 57857687 | 57857705 | 9.5     | .                  | .        | intergenic | -0.077 | rs787917129       | 2 |
| AAAC.GTTT   | 1 | 57899650 | 57899673 | 6       | .                  | .        | intergenic | .      | rs786533512       | 2 |
| AT.AT       | 1 | 57901826 | 57901844 | 9.5     | .                  | .        | intergenic | -0.019 | .                 | 2 |
| AAAAG.CTTTT | 1 | 57939720 | 57939741 | 4.4     | .                  | .        | intergenic | 0.641  | rs704974494       | 2 |
| AG.CT       | 1 | 58141913 | 58141928 | 8       | .                  | .        | intergenic | 0.261  | rs787229297       | 4 |
| AG.CT       | 1 | 58320254 | 58320265 | 6       | .                  | .        | intergenic | 0.032  | rs797603 rs7862   | 2 |
| AC.GT       | 1 | 58404370 | 58404380 | 5.5     | ENSSSCT00000004730 | RIMS1    | intron     | 0.053  | rs792964788       | 3 |
| AG.CT       | 1 | 58566974 | 58566993 | 10      | ENSSSCT00000004730 | RIMS1    | intron     | -0.3   | rs790102141       | 2 |
| AAAC.GTTT   | 1 | 58636080 | 58636096 | 4.25    | .                  | .        | intergenic | 0.023  | rs787043340       | 2 |
| AAAG.CTTT   | 1 | 58671786 | 58671805 | 5       | .                  | .        | intergenic | 0.157  | rs7828174 rs7938  | 2 |
| ACC.GGT     | 1 | 58866687 | 58866703 | 5.66667 | .                  | .        | intergenic | 0.023  | rs791299335       | 2 |
| AAAAC.GTTTT | 1 | 59037392 | 59037421 | 6       | .                  | .        | intergenic | .      | rs788144130       | 2 |
| AAT.ATT     | 1 | 59051657 | 59051668 | 4       | .                  | .        | intergenic | 0.088  | rs791788582       | 2 |
| AAAG.CTTT   | 1 | 59092158 | 59092176 | 4.75    | .                  | .        | intergenic | .      | rs792035886       | 2 |
| AAAAC.GTTTT | 1 | 59328526 | 59328541 | 3.2     | .                  | .        | intergenic | .      | rs788688388       | 2 |
| AT.AT       | 1 | 59366349 | 59366359 | 5.5     | ENSSSCT00000004740 | DDX43    | intron     | -0.184 | rs789954417       | 2 |
| AT.AT       | 1 | 59366349 | 59366359 | 5.5     | ENSSSCT00000023321 | CYB5R4   | intron     | -0.184 | rs789954417       | 2 |
| AAC.GTT     | 1 | 59551967 | 59551979 | 4.33333 | .                  | .        | intergenic | .      | .                 | 2 |
| AC.GT       | 1 | 59739540 | 59739552 | 6.5     | ENSSSCT00000004742 | KIAA1009 | intron     | 0.109  | rs786526874       | 2 |
| AC.GT       | 1 | 60039276 | 60039302 | 13.5    | .                  | .        | intergenic | 0.201  | rs787927710       | 2 |
| AT.AT       | 1 | 60214391 | 60214403 | 6.5     | ENSSSCT00000004744 | TBX18    | intron     | 0.38   | .                 | 4 |
| AAT.ATT     | 1 | 60558740 | 60558758 | 6.33333 | .                  | .        | intergenic | 0.097  | .                 | 2 |
| ATCC.GGAT   | 1 | 60751412 | 60751439 | 7       | .                  | .        | intergenic | -0.076 | rs798232 rs7877   | 2 |
| AAAAT.ATTTT | 1 | 60889906 | 60889930 | 5       | .                  | .        | intergenic | 0.178  | rs792451913       | 2 |
| AAT.ATT     | 1 | 60905397 | 60905414 | 6       | ENSSSCT00000004747 | SNX14    | intron     | 1.934  | rs792845 rs7929   | 2 |
| AAAT.ATTT   | 1 | 61006591 | 61006617 | 6.75    | ENSSSCT00000004748 | SYNCRIP  | intron     | 4.12   | rs793812 rs7932   | 2 |
| AAAC.GTTT   | 1 | 61539589 | 61539611 | 5.75    | .                  | .        | intergenic | 0.1    | rs789077953       | 2 |
| AC.GT       | 1 | 61556464 | 61556478 | 7.5     | .                  | .        | intergenic | 0.124  | rs791191714       | 2 |
| AG.CT       | 1 | 62012587 | 62012603 | 8.5     | .                  | .        | intergenic | 0.563  | rs792872172       | 3 |
| AT.AT       | 1 | 62024381 | 62024395 | 7.5     | .                  | .        | intergenic | .      | .                 | 3 |
| AAAG.CTTT   | 1 | 62062816 | 62062831 | 4       | .                  | .        | intergenic | 0.035  | .                 | 2 |
| AAAT.ATTT   | 1 | 62379993 | 62380006 | 3.5     | ENSSSCT00000029112 | ZNF292   | intron     | 0.293  | rs786818103       | 2 |
| AAAT.ATTT   | 1 | 62407926 | 62407947 | 5.5     | .                  | .        | intergenic | -0.049 | rs786672980       | 2 |
| AAAC.GTTT   | 1 | 62436537 | 62436556 | 5       | .                  | .        | intergenic | 0.166  | rs79146663 rs7917 | 2 |
| AATT.AATT   | 1 | 62440067 | 62440089 | 5.75    | .                  | .        | intergenic | 0.159  | rs793147507       | 2 |
| AAAC.GTTT   | 1 | 62790015 | 62790030 | 4       | ENSSSCT00000004762 | AKIRIN2  | 3'utr      | .      | rs793312 rs7928   | 2 |
| AT.AT       | 1 | 62817841 | 62817866 | 13      | .                  | .        | intergenic | 0.2    | .                 | 2 |
| AAAAT.ATTTT | 1 | 62900592 | 62900606 | 3       | .                  | .        | intergenic | 0.027  | rs792325963       | 2 |
| AG.CT       | 1 | 63071982 | 63071992 | 5.5     | .                  | .        | intergenic | 0.009  | .                 | 3 |
| AAAAC.GTTTT | 1 | 63307658 | 63307681 | 4.8     | .                  | .        | intergenic | 0.216  | rs789573594       | 2 |
| AC.GT       | 1 | 63374393 | 63374402 | 5       | .                  | .        | intergenic | -0.222 | rs788338558       | 2 |
| AAG.CTT     | 1 | 63383771 | 63383782 | 4       | .                  | .        | intergenic | 0.398  | rs7959288 rs7888  | 4 |
| AC.GT       | 1 | 63447148 | 63447162 | 7.5     | .                  | .        | intergenic | 0.32   | rs793252978       | 2 |
| AAAAC.GTTTT | 1 | 63473963 | 63473986 | 4.8     | .                  | .        | intergenic | 0.182  | rs788417584       | 2 |

|              |   |          |          |         |                    |         |            |        |               |   |
|--------------|---|----------|----------|---------|--------------------|---------|------------|--------|---------------|---|
| AAAAC.GTTTT  | 1 | 63673626 | 63673642 | 3.4     | ENSSSCT00000029164 | .       | intron     | .      | rs789276901   | 2 |
| AC.GT        | 1 | 64362444 | 64362456 | 6.5     | .                  | .       | intergenic | 0.275  | rs789515298   | 2 |
| AT.AT        | 1 | 64741617 | 64741628 | 6       | ENSSSCT00000027915 | .       | intron     | .      | rs793485844   | 3 |
| AT.AT        | 1 | 64741617 | 64741628 | 6       | ENSSSCT00000004785 | .       | intron     | .      | rs793485844   | 3 |
| AAC.GTT      | 1 | 64979479 | 64979491 | 4.33333 | ENSSSCT00000004788 | BACH2   | intron     | 0.305  | rs786290649   | 2 |
| AAAAC.GTTTT  | 1 | 65192289 | 65192304 | 3.2     | .                  | .       | intergenic | -0.089 | rs791835771   | 2 |
| AAAAC.GTTTT  | 1 | 65224399 | 65224422 | 4.8     | .                  | .       | intergenic | -0.044 | rs792420111   | 2 |
| AATG.CATT    | 1 | 65311927 | 65311947 | 5.25    | .                  | .       | intergenic | 0.031  | rs793870556   | 2 |
| AAAG.CTTT    | 1 | 65367475 | 65367518 | 11      | .                  | .       | intergenic | 0.314  | rs790552560   | 2 |
| AG.CT        | 1 | 65763250 | 65763259 | 5       | .                  | .       | intergenic | .      | rs793044469   | 2 |
| AC.GT        | 1 | 66048304 | 66048320 | 8.5     | .                  | .       | intergenic | 0.164  | 011117 rs7915 | 4 |
| AT.AT        | 1 | 66123484 | 66123494 | 5.5     | .                  | .       | intergenic | 0.151  | rs790986049   | 2 |
| AC.GT        | 1 | 66224158 | 66224190 | 16.5    | .                  | .       | intergenic | 0.034  | rs793249009   | 4 |
| AT.AT        | 1 | 66265022 | 66265035 | 7       | .                  | .       | intergenic | 0.025  | rs793733624   | 2 |
| AT.AT        | 1 | 66445628 | 66445644 | 8.5     | .                  | .       | intergenic | 0.119  | rs788273912   | 2 |
| AC.GT        | 1 | 66457452 | 66457466 | 7.5     | .                  | .       | intergenic | 0.537  | 398088 rs7930 | 2 |
| AC.GT        | 1 | 66744550 | 66744591 | 21      | .                  | .       | intergenic | -0.15  | 305125 rs7884 | 2 |
| AAAT.ATTT    | 1 | 67058682 | 67058696 | 3.75    | .                  | .       | intergenic | .      | rs790428743   | 3 |
| AT.AT        | 1 | 67244439 | 67244450 | 6       | .                  | .       | intergenic | -0.061 | .             | 2 |
| AAAAG.CTTTT  | 1 | 67359354 | 67359369 | 3.2     | .                  | .       | intergenic | -0.025 | rs791119865   | 2 |
| AAG.CTT      | 1 | 67549563 | 67549576 | 4.66667 | .                  | .       | intergenic | .      | rs789044493   | 2 |
| AT.AT        | 1 | 68132123 | 68132147 | 12.5    | .                  | .       | intergenic | -0.081 | rs712254206   | 2 |
| AAT.ATT      | 1 | 68874901 | 68874912 | 4       | .                  | .       | intergenic | 0.032  | rs786663249   | 2 |
| AAAC.GTTT    | 1 | 68886557 | 68886575 | 4.75    | .                  | .       | intergenic | .      | 142729 rs7871 | 3 |
| AT.AT        | 1 | 69105307 | 69105325 | 9.5     | .                  | .       | intergenic | -0.021 | rs790754580   | 2 |
| AC.GT        | 1 | 69598605 | 69598618 | 7       | .                  | .       | intergenic | -0.018 | rs692181455   | 3 |
| ATC.GAT      | 1 | 69610242 | 69610264 | 7.66667 | .                  | .       | intergenic | -0.151 | .             | 3 |
| AG.CT        | 1 | 69642707 | 69642732 | 13      | .                  | .       | intergenic | 0.006  | rs791158789   | 4 |
| AG.CT        | 1 | 69807950 | 69807961 | 6       | .                  | .       | intergenic | .      | .             | 4 |
| AC.GT        | 1 | 70032511 | 70032524 | 7       | .                  | .       | intergenic | -0.03  | rs787530510   | 2 |
| AG.CT        | 1 | 70144263 | 70144297 | 17.5    | .                  | .       | intergenic | 0.039  | rs789190993   | 2 |
| AT.AT        | 1 | 70192148 | 70192160 | 6.5     | .                  | .       | intergenic | .      | rs793278755   | 2 |
| AC.GT        | 1 | 70374929 | 70374948 | 10      | .                  | .       | intergenic | -0.024 | 344603 rs7872 | 3 |
| AC.GT        | 1 | 70908997 | 70909008 | 6       | .                  | .       | intergenic | 0.101  | rs791088007   | 4 |
| AT.AT        | 1 | 71100499 | 71100512 | 7       | .                  | .       | intergenic | 0.095  | rs791520505   | 2 |
| AAT.ATT      | 1 | 71129560 | 71129577 | 6       | .                  | .       | intergenic | 0.256  | rs791957658   | 2 |
| AG.CT        | 1 | 71138631 | 71138645 | 7.5     | .                  | .       | intergenic | .      | rs786552360   | 2 |
| ACAT.ATGT    | 1 | 71193879 | 71193899 | 5.25    | .                  | .       | intergenic | .      | 364225 rs7936 | 2 |
| AT.AT        | 1 | 71430084 | 71430093 | 5       | .                  | .       | intergenic | 0.121  | rs789459557   | 2 |
| AT.AT        | 1 | 71452036 | 71452046 | 5.5     | .                  | .       | intergenic | -0.084 | rs789796795   | 2 |
| AT.AT        | 1 | 71629379 | 71629389 | 5.5     | .                  | .       | intergenic | 0.142  | .             | 4 |
| AAG.CTT      | 1 | 71851218 | 71851249 | 10.6667 | .                  | .       | intergenic | 0.109  | rs789240231   | 2 |
| ACAG.CTGT    | 1 | 71947359 | 71947377 | 4.75    | .                  | .       | intergenic | 0.398  | rs790216507   | 2 |
| AC.GT        | 1 | 71994527 | 71994541 | 7.5     | .                  | .       | intergenic | 0.083  | .             | 3 |
| AAAC.GTTT    | 1 | 72272987 | 72273000 | 3.5     | .                  | .       | intergenic | 0.148  | 342770 rs7884 | 2 |
| AC.GT        | 1 | 72380406 | 72380416 | 5.5     | .                  | .       | intergenic | 0.551  | rs788473725   | 2 |
| AT.AT        | 1 | 72408881 | 72408894 | 7       | ENSSSCT00000029077 | NDUFAF4 | intron     | 0.083  | rs787641866   | 2 |
| AT.AT        | 1 | 72408881 | 72408894 | 7       | ENSSSCT00000004798 | NDUFAF4 | intron     | 0.083  | rs787641866   | 2 |
| AT.AT        | 1 | 72883454 | 72883471 | 9       | ENSSSCT00000004802 | .       | intron     | .      | .             | 3 |
| AAAAC.GTTTT  | 1 | 72917693 | 72917715 | 3.83333 | .                  | .       | intergenic | .      | rs790450543   | 2 |
| AAAC.GTTT    | 1 | 73691003 | 73691038 | 9       | .                  | .       | intergenic | 0.054  | rs793281321   | 2 |
| AAT.ATT      | 1 | 73849452 | 73849471 | 6.66667 | .                  | .       | intergenic | 0.086  | .             | 2 |
| AAAAAT.ATTTT | 1 | 73874251 | 73874272 | 3.66667 | .                  | .       | intergenic | -0.179 | 106965 rs7883 | 2 |
| AAAT.ATTT    | 1 | 73895895 | 73895909 | 3.75    | .                  | .       | intergenic | 0.032  | .             | 2 |
| AG.CT        | 1 | 73952002 | 73952013 | 6       | .                  | .       | intergenic | 0.137  | rs787510403   | 2 |
| AAAT.ATTT    | 1 | 74214254 | 74214267 | 3.5     | .                  | .       | intergenic | -0.001 | rs790450786   | 2 |
| AG.CT        | 1 | 74215940 | 74215956 | 8.5     | .                  | .       | intergenic | 0.314  | rs789160924   | 3 |
| AC.GT        | 1 | 74274815 | 74274825 | 5.5     | .                  | .       | intergenic | 0.21   | rs789534369   | 2 |
| AT.AT        | 1 | 74330827 | 74330836 | 5       | .                  | .       | intergenic | 0.114  | .             | 3 |
| AAAAC.GTTTT  | 1 | 74453887 | 74453901 | 3       | ENSSSCT00000004804 | FBXL4   | intron     | 0.149  | .             | 2 |
| AGG.CCT      | 1 | 74926707 | 74926721 | 5       | .                  | .       | intergenic | 0.07   | .             | 2 |
| AG.CT        | 1 | 74942943 | 74942957 | 7.5     | ENSSSCT00000004805 | .       | intron     | 0.08   | rs791406515   | 2 |
| AC.GT        | 1 | 75177547 | 75177565 | 9.5     | .                  | .       | intergenic | .      | rs789045638   | 6 |
| AG.CT        | 1 | 75460762 | 75460779 | 9       | .                  | .       | intergenic | 0.176  | rs702096286   | 3 |
| AAC.GTT      | 1 | 75634314 | 75634333 | 6.66667 | .                  | .       | intergenic | .      | 797363 rs7903 | 2 |
| AT.AT        | 1 | 76097926 | 76097938 | 6.5     | .                  | .       | intergenic | 0.151  | rs790737973   | 3 |
| AG.CT        | 1 | 76106519 | 76106530 | 6       | .                  | .       | intergenic | -0.022 | rs788078783   | 2 |
| AAAC.GTTT    | 1 | 76555888 | 76555909 | 5.5     | .                  | .       | intergenic | .      | rs790972507   | 2 |
| AAAC.GTTT    | 1 | 76749396 | 76749415 | 5       | .                  | .       | intergenic | .      | rs789418874   | 2 |
| AC.GT        | 1 | 76947261 | 76947281 | 10.5    | .                  | .       | intergenic | 0.368  | 333003 rs7898 | 3 |
| AAAT.ATTT    | 1 | 76973342 | 76973362 | 5.25    | .                  | .       | intergenic | -0.019 | .             | 2 |
| AACT.AGTT    | 1 | 77101986 | 77101999 | 3.5     | .                  | .       | intergenic | .      | rs789726133   | 2 |
| AAAC.GTTT    | 1 | 77186796 | 77186822 | 6.75    | ENSSSCT00000032833 | GRIK2   | intron     | -0.086 | 208126 rs7865 | 2 |
| AAAC.GTTT    | 1 | 77186796 | 77186822 | 6.75    | ENSSSCT00000004819 | GRIK2   | intron     | -0.086 | 208126 rs7865 | 2 |
| AAAG.CTTT    | 1 | 77200534 | 77200561 | 7       | ENSSSCT00000032833 | GRIK2   | intron     | 1.065  | 271576 rs7891 | 2 |
| AAAG.CTTT    | 1 | 77200534 | 77200561 | 7       | ENSSSCT00000004819 | GRIK2   | intron     | 1.065  | 271576 rs7891 | 2 |
| AT.AT        | 1 | 77206723 | 77206749 | 13.5    | ENSSSCT00000032833 | GRIK2   | intron     | 0.075  | .             | 2 |
| AT.AT        | 1 | 77206723 | 77206749 | 13.5    | ENSSSCT00000004819 | GRIK2   | intron     | 0.075  | .             | 2 |
| AAAAC.GTTTT  | 1 | 77223155 | 77223178 | 4.8     | ENSSSCT00000032833 | GRIK2   | intron     | .      | rs786385099   | 2 |
| AAAAC.GTTTT  | 1 | 77223155 | 77223178 | 4.8     | ENSSSCT00000004819 | GRIK2   | intron     | .      | rs786385099   | 2 |
| AAAT.ATTT    | 1 | 77345200 | 77345220 | 5.25    | ENSSSCT00000032833 | GRIK2   | intron     | 0.422  | rs790811796   | 2 |
| AAAT.ATTT    | 1 | 77345200 | 77345220 | 5.25    | ENSSSCT00000004819 | GRIK2   | intron     | 0.422  | rs790811796   | 2 |
| AAT.ATT      | 1 | 77517036 | 77517062 | 9       | ENSSSCT00000035045 | GRIK2   | intron     | -0.036 | rs787870500   | 2 |
| AAT.ATT      | 1 | 77517036 | 77517062 | 9       | ENSSSCT00000004819 | GRIK2   | intron     | -0.036 | rs787870500   | 2 |



|             |   |          |          |         |                     |          |            |        |                 |   |
|-------------|---|----------|----------|---------|---------------------|----------|------------|--------|-----------------|---|
| AC.GT       | 1 | 77967026 | 77967036 | 5.5     | .                   | .        | intergenic | .      | rs787761492     | 2 |
| AT.AT       | 1 | 78067448 | 78067458 | 5.5     | .                   | .        | intergenic | 0.169  | rs790838868     | 4 |
| AG.CT       | 1 | 78073332 | 78073345 | 7       | .                   | .        | intergenic | 0.019  | rs789803196     | 2 |
| AG.CT       | 1 | 78363036 | 78363061 | 13      | .                   | .        | intergenic | -0.084 | rs790316557     | 2 |
| AG.CT       | 1 | 78376790 | 78376818 | 14.5    | .                   | .        | intergenic | 0.461  | rs786837778     | 2 |
| AG.CT       | 1 | 78434834 | 78434848 | 7.5     | .                   | .        | intergenic | 0.511  | .               | 4 |
| AAAAT.ATTTT | 1 | 78444928 | 78444942 | 3       | .                   | .        | intergenic | 0.229  | .               | 2 |
| AAAAC.GTTTT | 1 | 78559613 | 78559638 | 4.33333 | .                   | .        | intergenic | 0.287  | rs15042 rs7870  | 2 |
| AC.GT       | 1 | 78621379 | 78621389 | 5.5     | .                   | .        | intergenic | 0.4    | .               | 2 |
| AT.AT       | 1 | 78871183 | 78871197 | 7.5     | .                   | .        | intergenic | -0.019 | rs789040157     | 2 |
| AT.AT       | 1 | 78956582 | 78956608 | 13.5    | .                   | .        | intergenic | .      | rs793506424     | 2 |
| AG.CT       | 1 | 79026382 | 79026400 | 9.5     | .                   | .        | intergenic | .      | .               | 4 |
| AG.CT       | 1 | 79096147 | 79096157 | 5.5     | .                   | .        | intergenic | .      | .               | 4 |
| AC.GT       | 1 | 79452380 | 79452390 | 5.5     | .                   | .        | intergenic | 0.098  | .               | 2 |
| AAAAT.ATTTT | 1 | 79556831 | 79556856 | 4.33333 | .                   | .        | intergenic | 0.232  | rs788252706     | 2 |
| AC.GT       | 1 | 79568793 | 79568804 | 6       | .                   | .        | intergenic | .      | rs791259860     | 3 |
| AG.CT       | 1 | 79622915 | 79622926 | 6       | .                   | .        | intergenic | .      | .               | 4 |
| AAAT.ATTT   | 1 | 79919873 | 79919895 | 5.75    | .                   | .        | intergenic | 0.003  | rs788944966     | 2 |
| AAAAT.ATTTT | 1 | 79975403 | 79975430 | 4.66667 | .                   | .        | intergenic | 1.101  | rs792619341     | 2 |
| AAAAG.CTTTT | 1 | 80213002 | 80213035 | 6.8     | .                   | .        | intergenic | 0.19   | rs300033 rs7900 | 2 |
| AC.GT       | 1 | 80294279 | 80294300 | 11      | ENSSSCT00000004823  | HACE1    | intron     | 0.373  | rs793069219     | 2 |
| AAAC.GTTT   | 1 | 80409159 | 80409172 | 3.5     | .                   | .        | intergenic | 0.266  | rs304889 rs7866 | 2 |
| AAAC.GTTT   | 1 | 80425859 | 80425888 | 7.5     | .                   | .        | intergenic | 0.247  | rs786527673     | 2 |
| AAAT.ATTT   | 1 | 80665016 | 80665036 | 5.25    | ENSSSCT00000004826  | BVES     | intron     | 0.266  | rs789174196     | 2 |
| AAAT.ATTT   | 1 | 80665016 | 80665036 | 5.25    | ENSSSCT00000004825  | BVES     | intron     | 0.266  | rs789174196     | 2 |
| AAC.GTT     | 1 | 80745434 | 80745448 | 5       | .                   | .        | intergenic | .      | .               | 3 |
| AT.AT       | 1 | 80893253 | 80893263 | 5.5     | ENSSSCT00000004829  | PREP     | promoter   | 0.109  | .               | 2 |
| AAAG.CTTT   | 1 | 81155518 | 81155539 | 5.5     | .                   | .        | intergenic | 0.073  | .               | 2 |
| AAAAT.ATTTT | 1 | 81286437 | 81286473 | 6.16667 | .                   | .        | intergenic | .      | rs787782609     | 2 |
| AC.GT       | 1 | 81386354 | 81386364 | 5.5     | .                   | .        | intergenic | 0.271  | rs791121836     | 2 |
| AAAC.GTTT   | 1 | 81388698 | 81388720 | 5.75    | .                   | .        | intergenic | -0.28  | rs789920509     | 2 |
| AATG.CATT   | 1 | 81883838 | 81883857 | 5       | .                   | .        | intergenic | 0.049  | rs787241279     | 2 |
| AAG.CTT     | 1 | 82131564 | 82131581 | 6       | ENSSSCT00000004835  | .        | intron     | 0.376  | rs786761030     | 2 |
| AG.CT       | 1 | 82169733 | 82169744 | 6       | .                   | .        | intergenic | .      | rs792644708     | 2 |
| AT.AT       | 1 | 82306148 | 82306162 | 7.5     | .                   | .        | intergenic | .      | rs130261 rs7866 | 2 |
| AC.GT       | 1 | 82428557 | 82428571 | 7.5     | .                   | .        | intergenic | -0.148 | rs791114306     | 2 |
| AAAT.ATTT   | 1 | 82652788 | 82652806 | 4.75    | .                   | .        | intergenic | 0.211  | .               | 2 |
| AAC.GTT     | 1 | 82665154 | 82665173 | 6.66667 | .                   | .        | intergenic | 0.081  | .               | 2 |
| AC.GT       | 1 | 82719863 | 82719876 | 7       | .                   | .        | intergenic | .      | rs791464634     | 2 |
| AC.GT       | 1 | 82845362 | 82845373 | 6       | .                   | .        | intergenic | 0.784  | rs792805843     | 2 |
| AT.AT       | 1 | 83007068 | 83007078 | 5.5     | .                   | .        | intergenic | .      | rs788674184     | 2 |
| AT.AT       | 1 | 83210423 | 83210433 | 5.5     | .                   | .        | intergenic | 0.02   | rs388642 rs7887 | 2 |
| AAAC.GTTT   | 1 | 83523580 | 83523601 | 5.5     | .                   | .        | intergenic | 0.248  | rs368876 rs7886 | 2 |
| AG.CT       | 1 | 83618869 | 83618893 | 12.5    | .                   | .        | intergenic | 0.198  | rs788534522     | 3 |
| AAAAC.GTTTT | 1 | 83721148 | 83721169 | 3.66667 | ENSSSCT00000004848  | .        | intron     | .      | rs790787126     | 2 |
| AT.AT       | 1 | 83852158 | 83852168 | 5.5     | .                   | .        | intergenic | .      | rs790709432     | 2 |
| AAAAC.GTTTT | 1 | 83989803 | 83989840 | 7.6     | ENSSSCT00000004849  | FOXO3A   | intron     | 0.107  | .               | 2 |
| AAAAT.ATTTT | 1 | 84027916 | 84027937 | 4.4     | ENSSSCT00000004849  | FOXO3A   | intron     | .      | rs789098840     | 2 |
| AATG.CATT   | 1 | 84175909 | 84175936 | 7       | .                   | .        | intergenic | -0.023 | rs793573133     | 2 |
| AC.GT       | 1 | 84176691 | 84176703 | 6.5     | .                   | .        | intergenic | .      | .               | 4 |
| AAAG.CTTT   | 1 | 84405669 | 84405699 | 7.75    | .                   | .        | intergenic | 0.292  | .               | 2 |
| AT.AT       | 1 | 84512121 | 84512130 | 5       | ENSSSCT00000004854  | CEP57L1  | intron     | .      | .               | 2 |
| AT.AT       | 1 | 84512121 | 84512130 | 5       | ENSSSCT000000029999 | CEP57L1  | intron     | .      | .               | 2 |
| AAAC.GTTT   | 1 | 84655744 | 84655758 | 3.75    | ENSSSCT00000004878  | .        | intron     | .      | rs793515583     | 2 |
| AC.GT       | 1 | 84671844 | 84671856 | 6.5     | ENSSSCT00000004878  | .        | intron     | -0.052 | rs790155291     | 2 |
| AG.CT       | 1 | 84802871 | 84802881 | 5.5     | .                   | .        | intergenic | 0.196  | .               | 3 |
| AAAC.GTTT   | 1 | 84877908 | 84877934 | 6.75    | ENSSSCT00000004874  | ZBTB24   | promoter   | .      | rs789530094     | 2 |
| AGG.CCT     | 1 | 85162623 | 85162635 | 4.33333 | .                   | .        | intergenic | 0.359  | rs792037026     | 2 |
| AAAAC.GTTTT | 1 | 85186920 | 85186936 | 3.4     | .                   | .        | intergenic | 0.146  | rs789988478     | 2 |
| AAAC.GTTT   | 1 | 85199328 | 85199371 | 11      | .                   | .        | intergenic | 0.312  | rs789903018     | 2 |
| AT.AT       | 1 | 86000503 | 86000512 | 5       | .                   | .        | intergenic | .      | rs788967357     | 2 |
| AAC.GTT     | 1 | 86046218 | 86046229 | 4       | ENSSSCT00000004862  | SLC22A16 | intron     | 0.2    | rs787798329     | 2 |
| AAC.GTT     | 1 | 86076678 | 86076700 | 7.66667 | .                   | .        | intergenic | -0.002 | rs301817 rs7890 | 2 |
| AAC.GTT     | 1 | 86320573 | 86320596 | 8       | ENSSSCT00000004857  | RPF2     | intron     | -0.167 | rs793814625     | 2 |
| AC.GT       | 1 | 86353179 | 86353193 | 7.5     | ENSSSCT00000004856  | GTF3C6   | 3'utr      | 0.075  | rs788608643     | 2 |
| AAAAC.GTTTT | 1 | 86921610 | 86921633 | 4.8     | ENSSSCT000000025331 | .        | intron     | 0.324  | rs790923989     | 2 |
| AAG.CTT     | 1 | 87126065 | 87126082 | 6       | .                   | .        | intergenic | 0.245  | rs169834 rs7868 | 2 |
| AC.GT       | 1 | 87140027 | 87140039 | 6.5     | .                   | .        | intergenic | 1.152  | rs694281725     | 2 |
| AAAGC.GCTTT | 1 | 87249168 | 87249191 | 4       | ENSSSCT00000004886  | FYN      | intron     | 1.697  | rs789466128     | 2 |
| AAAGC.GCTTT | 1 | 87249168 | 87249191 | 4       | ENSSSCT00000004884  | FYN      | intron     | 1.697  | rs789466128     | 2 |
| AAAGC.GCTTT | 1 | 87249168 | 87249191 | 4       | ENSSSCT00000004885  | FYN      | intron     | 1.697  | rs789466128     | 2 |
| AGAT.ATCT   | 1 | 87377759 | 87377786 | 7       | ENSSSCT00000004886  | FYN      | intron     | .      | rs791976396     | 2 |
| AGAT.ATCT   | 1 | 87377759 | 87377786 | 7       | ENSSSCT00000004884  | FYN      | intron     | .      | rs791976396     | 2 |
| AGAT.ATCT   | 1 | 87377759 | 87377786 | 7       | ENSSSCT00000004885  | FYN      | intron     | .      | rs791976396     | 2 |
| AAAG.CTTT   | 1 | 87519823 | 87519835 | 3.25    | .                   | .        | intergenic | -0.045 | .               | 4 |
| AG.CT       | 1 | 87648187 | 87648198 | 6       | .                   | .        | intergenic | .      | rs694852576     | 3 |
| AAAAC.GTTTT | 1 | 87735253 | 87735275 | 4.6     | .                   | .        | intergenic | .      | .               | 2 |
| AAC.GTT     | 1 | 87735353 | 87735367 | 5       | .                   | .        | intergenic | .      | rs16768 rs7909  | 2 |
| AT.AT       | 1 | 87759643 | 87759665 | 11.5    | ENSSSCT00000004890  | .        | intron     | .      | rs787062072     | 2 |
| AC.GT       | 1 | 88470564 | 88470587 | 12      | .                   | .        | intergenic | 0.55   | rs793871696     | 2 |
| AT.AT       | 1 | 88605136 | 88605147 | 6       | .                   | .        | intergenic | -0.021 | rs790173143     | 2 |
| AAT.ATT     | 1 | 88903340 | 88903355 | 5.33333 | .                   | .        | intergenic | 0.063  | rs789223752     | 2 |
| AAAG.CTTT   | 1 | 89168891 | 89168922 | 8       | .                   | .        | intergenic | -0.009 | .               | 2 |
| AG.CT       | 1 | 89171593 | 89171613 | 10.5    | .                   | .        | intergenic | 0.197  | rs788834601     | 2 |

|             |   |           |           |         |                     |          |            |        |               |   |
|-------------|---|-----------|-----------|---------|---------------------|----------|------------|--------|---------------|---|
| AAAC.GTTT   | 1 | 89413203  | 89413220  | 4.5     | .                   | .        | intergenic | 0.698  | rs791435727   | 2 |
| AAAT.ATTT   | 1 | 89745706  | 89745723  | 4.5     | .                   | .        | intergenic | .      | rs793270621   | 2 |
| AAAG.CTTT   | 1 | 89930963  | 89930976  | 3.5     | ENSSSCT00000004897  | HDAC2    | intron     | .      | 390355 rs7863 | 2 |
| AT.AT       | 1 | 90128062  | 90128081  | 10      | .                   | .        | intergenic | 0.105  | .             | 4 |
| AC.GT       | 1 | 90292671  | 90292681  | 5.5     | .                   | .        | intergenic | 0.343  | rs790990254   | 4 |
| AAAC.GTTT   | 1 | 90480271  | 90480298  | 7       | .                   | .        | intergenic | .      | rs793244422   | 2 |
| AAAG.CTTT   | 1 | 90648749  | 90648763  | 3.75    | .                   | .        | intergenic | 0.039  | rs791190943   | 2 |
| AAAT.ATTT   | 1 | 90737138  | 90737156  | 4.75    | .                   | .        | intergenic | -0.271 | rs787229695   | 2 |
| AT.AT       | 1 | 90752481  | 90752492  | 6       | .                   | .        | intergenic | -0.073 | rs788909394   | 2 |
| AAAC.GTTT   | 1 | 90903351  | 90903364  | 3.5     | .                   | .        | intergenic | -0.127 | .             | 3 |
| AAAAT.ATTTT | 1 | 90942753  | 90942771  | 3.8     | .                   | .        | intergenic | 0.088  | rs789057237   | 2 |
| AT.AT       | 1 | 90960110  | 90960123  | 7       | .                   | .        | intergenic | -0.253 | rs789817240   | 2 |
| AAAAC.GTTTT | 1 | 91101568  | 91101593  | 5.2     | .                   | .        | intergenic | 0.579  | 220656 rs7867 | 2 |
| AT.AT       | 1 | 91118153  | 91118164  | 6       | .                   | .        | intergenic | 0.002  | rs792534764   | 2 |
| AAT.ATT     | 1 | 91190574  | 91190595  | 7.33333 | .                   | .        | intergenic | -0.035 | rs700471871   | 2 |
| AAAT.ATTT   | 1 | 91452983  | 91452996  | 3.5     | .                   | .        | intergenic | 0.16   | rs790173712   | 2 |
| AC.GT       | 1 | 91703290  | 91703308  | 9.5     | .                   | .        | intergenic | -0.015 | .             | 4 |
| AAGG.CCTT   | 1 | 91851864  | 91851878  | 3.75    | .                   | .        | intergenic | 0.115  | rs790550013   | 3 |
| AAAT.ATTT   | 1 | 91860756  | 91860778  | 5.75    | ENSSSCT00000004900  | NT5DC1   | promoter   | 0.084  | 773771 rs7867 | 2 |
| AAAT.ATTT   | 1 | 91860756  | 91860778  | 5.75    | ENSSSCT000000035653 | NT5DC1   | promoter   | 0.084  | 773771 rs7867 | 2 |
| AG.CT       | 1 | 91992465  | 91992475  | 5.5     | ENSSSCT000000035653 | NT5DC1   | intron     | 0.187  | rs792074774   | 2 |
| AG.CT       | 1 | 91992465  | 91992475  | 5.5     | ENSSSCT00000004900  | NT5DC1   | intron     | 0.187  | rs792074774   | 2 |
| AAAT.ATTT   | 1 | 92228771  | 92228801  | 7.75    | .                   | .        | intergenic | 0.355  | rs708434469   | 2 |
| AAAG.CTTT   | 1 | 92267185  | 92267218  | 8.5     | ENSSSCT00000004906  | DSE      | intron     | .      | rs790557641   | 2 |
| AAAAC.GTTTT | 1 | 92519700  | 92519727  | 5.6     | .                   | .        | intergenic | .      | rs792614937   | 2 |
| AG.CT       | 1 | 92842886  | 92842897  | 6       | ENSSSCT00000004918  | SNAP91   | intron     | -0.047 | rs789250221   | 2 |
| AT.AT       | 1 | 93040784  | 93040795  | 6       | .                   | .        | intergenic | 0.513  | 204508 rs7907 | 2 |
| AG.CT       | 1 | 93044288  | 93044305  | 9       | .                   | .        | intergenic | .      | .             | 2 |
| AAC.GTT     | 1 | 93176165  | 93176179  | 5       | ENSSSCT00000004920  | ME1      | intron     | .      | rs792484034   | 3 |
| AAAAC.GTTTT | 1 | 93224461  | 93224499  | 7.8     | ENSSSCT00000004920  | ME1      | intron     | 0.058  | rs787861998   | 2 |
| AAAC.GTTT   | 1 | 93287068  | 93287086  | 4.75    | ENSSSCT000000035912 | DOPEY1   | intron     | 0.238  | rs789532639   | 2 |
| AAAC.GTTT   | 1 | 93287068  | 93287086  | 4.75    | ENSSSCT00000004923  | DOPEY1   | intron     | 0.238  | rs789532639   | 2 |
| AAAC.GTTT   | 1 | 93287068  | 93287086  | 4.75    | ENSSSCT000000022952 | DOPEY1   | intron     | 0.238  | rs789532639   | 2 |
| AT.AT       | 1 | 93460078  | 93460101  | 12      | ENSSSCT000000032416 | .        | intron     | 0.39   | .             | 2 |
| AAAC.GTTT   | 1 | 93508292  | 93508314  | 5.75    | ENSSSCT000000025129 | UBE3D    | intron     | 0.083  | rs787501743   | 2 |
| AC.GT       | 1 | 94094725  | 94094738  | 7       | .                   | .        | intergenic | 0.09   | rs793085506   | 2 |
| AT.AT       | 1 | 94126276  | 94126286  | 5.5     | .                   | .        | intergenic | .      | .             | 2 |
| AAAC.GTTT   | 1 | 94369344  | 94369363  | 5       | .                   | .        | intergenic | 0.177  | 318074 rs7923 | 2 |
| AG.CT       | 1 | 94455768  | 94455780  | 6.5     | .                   | .        | intergenic | 0.381  | rs792648033   | 2 |
| AAAT.ATTT   | 1 | 94539328  | 94539357  | 7.5     | ENSSSCT00000004926  | IBTK     | intron     | -0.095 | rs793297516   | 2 |
| AAAT.ATTT   | 1 | 94539328  | 94539357  | 7.5     | ENSSSCT000000021698 | SNORD112 | promoter   | -0.095 | rs793297516   | 2 |
| AAAC.GTTT   | 1 | 94614765  | 94614787  | 5.75    | .                   | .        | intergenic | .      | rs786298667   | 2 |
| AAAT.ATTT   | 1 | 94694546  | 94694573  | 7       | .                   | .        | intergenic | .      | rs788118469   | 2 |
| AATG.CATT   | 1 | 94709038  | 94709055  | 4.5     | .                   | .        | intergenic | 0.104  | .             | 2 |
| AC.GT       | 1 | 94952399  | 94952429  | 15.5    | .                   | .        | intergenic | 0.252  | rs788197600   | 4 |
| AC.GT       | 1 | 95164223  | 95164237  | 7.5     | .                   | .        | intergenic | 0.222  | .             | 2 |
| AAAT.ATTT   | 1 | 95379225  | 95379244  | 5       | .                   | .        | intergenic | 0.136  | rs793238310   | 2 |
| AG.CT       | 1 | 95562729  | 95562748  | 10      | .                   | .        | intergenic | .      | rs791537104   | 2 |
| AT.AT       | 1 | 95583481  | 95583493  | 6.5     | .                   | .        | intergenic | -0.317 | rs791821044   | 2 |
| AC.GT       | 1 | 95631515  | 95631530  | 8       | .                   | .        | intergenic | -0.083 | rs790223518   | 2 |
| AT.AT       | 1 | 95790417  | 95790446  | 15      | .                   | .        | intergenic | .      | rs789568397   | 2 |
| AAC.GTT     | 1 | 95892966  | 95892981  | 5.33333 | .                   | .        | intergenic | -0.002 | rs790286441   | 2 |
| AT.AT       | 1 | 96056338  | 96056349  | 6       | .                   | .        | intergenic | .      | rs788789194   | 2 |
| AAAC.GTTT   | 1 | 96317126  | 96317154  | 7.25    | .                   | .        | intergenic | 0.022  | 348889 rs7907 | 2 |
| AAG.CTT     | 1 | 96332481  | 96332494  | 4.66667 | .                   | .        | intergenic | 0.142  | rs788172496   | 2 |
| AAT.ATT     | 1 | 96494262  | 96494293  | 10.6667 | ENSSSCT000000024946 | BCKDHB   | intron     | 0.007  | rs790914807   | 2 |
| AC.GT       | 1 | 97129394  | 97129412  | 9.5     | .                   | .        | intergenic | .      | rs793306491   | 3 |
| AAAC.GTTT   | 1 | 97184041  | 97184060  | 5       | .                   | .        | intergenic | -0.201 | rs787623495   | 2 |
| AG.CT       | 1 | 97192209  | 97192225  | 8.5     | .                   | .        | intergenic | -0.053 | 186374 rs7886 | 2 |
| AAAC.GTTT   | 1 | 97336648  | 97336675  | 7       | ENSSSCT00000004936  | LCA5     | intron     | 0.14   | rs787117732   | 2 |
| AAAAC.GTTTT | 1 | 97546417  | 97546444  | 5.6     | .                   | .        | intergenic | .      | rs789252979   | 2 |
| AT.AT       | 1 | 97829824  | 97829865  | 21      | .                   | .        | intergenic | -0.094 | rs790211222   | 2 |
| AT.AT       | 1 | 97865297  | 97865308  | 6       | .                   | .        | intergenic | 0.187  | rs792790144   | 2 |
| AAAAC.GTTTT | 1 | 97868685  | 97868709  | 5       | .                   | .        | intergenic | 0.099  | rs790692992   | 2 |
| AAAC.GTTT   | 1 | 98545862  | 98545880  | 4.75    | .                   | .        | intergenic | .      | 371501 rs7914 | 2 |
| AC.GT       | 1 | 98630326  | 98630345  | 10      | .                   | .        | intergenic | 0.079  | rs792249373   | 3 |
| AATG.CATT   | 1 | 98631106  | 98631136  | 7.75    | .                   | .        | intergenic | 0.06   | 711505 rs7899 | 2 |
| AG.CT       | 1 | 98789885  | 98789895  | 5.5     | .                   | .        | intergenic | .      | .             | 4 |
| AAC.GTT     | 1 | 98822636  | 98822657  | 7.33333 | .                   | .        | intergenic | .      | 777318 rs7935 | 2 |
| AC.GT       | 1 | 98980696  | 98980706  | 5.5     | .                   | .        | intergenic | .      | .             | 3 |
| CACCC.GGGTG | 1 | 99156830  | 99156854  | 4.16667 | .                   | .        | intergenic | 0.002  | rs792715940   | 2 |
| AAAC.GTTT   | 1 | 99422196  | 99422222  | 6.75    | .                   | .        | intergenic | .      | rs788734692   | 2 |
| AGG.CCT     | 1 | 99440523  | 99440537  | 5       | .                   | .        | intergenic | .      | rs788903210   | 2 |
| AAT.ATT     | 1 | 99509313  | 99509327  | 5       | .                   | .        | intergenic | 0.178  | rs793795513   | 3 |
| AAAC.GTTT   | 1 | 99888903  | 99888929  | 6.75    | .                   | .        | intergenic | .      | rs793687577   | 2 |
| AG.CT       | 1 | 99977410  | 99977430  | 10.5    | .                   | .        | intergenic | .      | rs787679454   | 2 |
| AG.CT       | 1 | 100041632 | 100041646 | 7.5     | .                   | .        | intergenic | .      | rs789698475   | 2 |
| AAAC.GTTT   | 1 | 100253088 | 100253106 | 4.75    | .                   | .        | intergenic | 0.251  | 305251 rs7931 | 2 |
| AGAT.ATCT   | 1 | 100277892 | 100277903 | 3       | .                   | .        | intergenic | 0.165  | 172777 rs7894 | 2 |
| AAC.GTT     | 1 | 100311826 | 100311839 | 4.66667 | .                   | .        | intergenic | .      | rs791186672   | 2 |
| AG.CT       | 1 | 100362367 | 100362376 | 5       | .                   | .        | intergenic | .      | rs789249129   | 2 |
| AT.AT       | 1 | 100413357 | 100413371 | 7.5     | .                   | .        | intergenic | .      | .             | 2 |
| AC.GT       | 1 | 100520500 | 100520512 | 6.5     | .                   | .        | intergenic | 0.006  | rs786946960   | 3 |
| AC.GT       | 1 | 100524315 | 100524333 | 9.5     | .                   | .        | intergenic | 0.036  | rs706172646   | 2 |

|               |   |           |           |         |                    |         |            |        |               |   |
|---------------|---|-----------|-----------|---------|--------------------|---------|------------|--------|---------------|---|
| AAAC.GTTT     | 1 | 101291815 | 101291826 | 3       | .                  | .       | intergenic | 0.437  | 781628 rs7909 | 2 |
| AAGG.CCTT     | 1 | 101345322 | 101345335 | 3.5     | .                  | .       | intergenic | .      | rs786302860   | 2 |
| AAAC.GTTT     | 1 | 101501462 | 101501489 | 7       | .                  | .       | intergenic | -0.025 | rs792963588   | 2 |
| AG.CT         | 1 | 101625294 | 101625306 | 6.5     | ENSSSCT00000004949 | FILIP1  | intron     | -0.049 | rs790580784   | 2 |
| AAAAC.GTTTT   | 1 | 102002980 | 102003004 | 5       | .                  | .       | intergenic | .      | rs790302266   | 2 |
| ACAT.ATGT     | 1 | 102165762 | 102165775 | 3.5     | .                  | .       | intergenic | .      | rs792867680   | 2 |
| AT.AT         | 1 | 102449738 | 102449750 | 6.5     | .                  | .       | intergenic | .      | rs793814351   | 4 |
| AAAC.GTTT     | 1 | 102627186 | 102627230 | 11.25   | .                  | .       | intergenic | 0.163  | 383320 rs7906 | 2 |
| AAACC.GTTTT   | 1 | 102657847 | 102657863 | 3.4     | .                  | .       | intergenic | .      | .             | 2 |
| AC.GT         | 1 | 103175127 | 103175137 | 5.5     | ENSSSCT00000035901 | CD109   | intron     | -0.302 | .             | 2 |
| AC.GT         | 1 | 103175127 | 103175137 | 5.5     | ENSSSCT00000004956 | CD109   | intron     | -0.302 | .             | 2 |
| AC.GT         | 1 | 103175127 | 103175137 | 5.5     | ENSSSCT00000035127 | CD109   | intron     | -0.302 | .             | 2 |
| AT.AT         | 1 | 103363625 | 103363634 | 5       | ENSSSCT00000004957 | SLC17A5 | intron     | .      | .             | 2 |
| AC.GT         | 1 | 103667558 | 103667568 | 5.5     | .                  | .       | intergenic | .      | rs790666734   | 3 |
| AC.GT         | 1 | 103685722 | 103685732 | 5.5     | .                  | .       | intergenic | .      | rs792886333   | 3 |
| AC.GT         | 1 | 104155184 | 104155193 | 5       | .                  | .       | intergenic | -0.3   | .             | 2 |
| AAAC.GTT      | 1 | 104675818 | 104675831 | 4.66667 | .                  | .       | intergenic | .      | 317624 rs7894 | 2 |
| AAAAT.ATTTT   | 1 | 104937520 | 104937538 | 3.8     | .                  | .       | intergenic | 0.921  | rs793464536   | 2 |
| AC.GT         | 1 | 104950580 | 104950590 | 5.5     | .                  | .       | intergenic | 0.617  | rs787710023   | 2 |
| AC.GT         | 1 | 105269509 | 105269529 | 10.5    | .                  | .       | intergenic | 0.047  | rs787636788   | 2 |
| AATG.CATT     | 1 | 105438596 | 105438644 | 12.25   | ENSSSCT00000004963 | SLC14A1 | intron     | 0.017  | 389852 rs7937 | 2 |
| AAAC.GTTT     | 1 | 105900826 | 105900850 | 6.25    | .                  | .       | intergenic | .      | rs792765820   | 2 |
| AT.AT         | 1 | 105921955 | 105921964 | 5       | ENSSSCT00000004969 | HAUS1   | intron     | -0.095 | rs793579115   | 2 |
| AAAT.ATTT     | 1 | 105929361 | 105929376 | 4       | ENSSSCT00000004969 | HAUS1   | intron     | 0.11   | rs789664012   | 2 |
| AAG.CTT       | 1 | 106097505 | 106097517 | 4.33333 | .                  | .       | intergenic | .      | .             | 2 |
| AC.GT         | 1 | 106147009 | 106147022 | 7       | .                  | .       | intergenic | -0.039 | .             | 3 |
| AC.GT         | 1 | 106761598 | 106761610 | 6.5     | .                  | .       | intergenic | .      | rs788419756   | 4 |
| AAG.CTT       | 1 | 106978525 | 106978538 | 4.66667 | ENSSSCT00000004977 | SMAD2   | intron     | .      | rs792020409   | 2 |
| AT.AT         | 1 | 107009267 | 107009278 | 6       | .                  | .       | intergenic | .      | rs788189960   | 2 |
| AAAC.GTTT     | 1 | 107048037 | 107048056 | 5       | .                  | .       | intergenic | 0.621  | rs793249720   | 2 |
| AG.CT         | 1 | 107131892 | 107131908 | 8.5     | .                  | .       | intergenic | -0.085 | rs791501235   | 2 |
| AG.CT         | 1 | 107182157 | 107182168 | 6       | .                  | .       | intergenic | -0.275 | rs791610942   | 2 |
| AAG.CTT       | 1 | 107284891 | 107284907 | 5.66667 | .                  | .       | intergenic | -0.087 | rs792121340   | 2 |
| AAT.ATT       | 1 | 107386051 | 107386063 | 4.33333 | .                  | .       | intergenic | .      | rs789005855   | 2 |
| AC.GT         | 1 | 107450784 | 107450795 | 6       | .                  | .       | intergenic | 0.104  | .             | 2 |
| AAAAAC.GTTTTT | 1 | 107475981 | 107476010 | 5       | .                  | .       | intergenic | 0.339  | rs787397115   | 2 |
| AATG.CATT     | 1 | 107562149 | 107562166 | 4.5     | .                  | .       | intergenic | 0.002  | rs789634613   | 2 |
| AAGG.CCTT     | 1 | 107606974 | 107607023 | 12.5    | .                  | .       | intergenic | .      | rs787606811   | 2 |
| AG.CT         | 1 | 107626845 | 107626865 | 10.5    | .                  | .       | intergenic | 0.284  | rs790048786   | 2 |
| AG.CT         | 1 | 107677091 | 107677109 | 9.5     | ENSSSCT00000004978 | CTIF    | intron     | 0.144  | rs788888514   | 2 |
| AAAAC.GTTTT   | 1 | 107783811 | 107783831 | 4.2     | ENSSSCT00000004978 | CTIF    | intron     | -0.18  | rs786720488   | 2 |
| AT.AT         | 1 | 107926894 | 107926905 | 6       | ENSSSCT00000004978 | CTIF    | intron     | .      | rs790581810   | 2 |
| AATG.CATT     | 1 | 108006850 | 108006873 | 6       | ENSSSCT00000004978 | CTIF    | intron     | -0.008 | rs793349418   | 2 |
| ATC.GAT       | 1 | 108040423 | 108040434 | 4       | .                  | .       | intergenic | .      | .             | 2 |
| ACC.GGT       | 1 | 108062550 | 108062565 | 5.33333 | .                  | .       | intergenic | -0.281 | rs786897073   | 2 |
| AAAC.GTTT     | 1 | 108210151 | 108210166 | 4       | .                  | .       | intergenic | .      | rs787631705   | 2 |
| AAAC.GTTT     | 1 | 108327711 | 108327732 | 5.5     | ENSSSCT00000004980 | .       | intron     | 0.234  | rs788830916   | 2 |
| AAT.ATT       | 1 | 108363617 | 108363635 | 6.33333 | .                  | .       | intergenic | .      | 172519 rs7929 | 2 |
| ATC.GAT       | 1 | 108380999 | 108381019 | 7       | .                  | .       | intergenic | 0.447  | rs786987620   | 3 |
| AT.AT         | 1 | 108763075 | 108763093 | 9.5     | .                  | .       | intergenic | -0.139 | 378689 rs7912 | 2 |
| AAAAT.ATTTT   | 1 | 109260733 | 109260750 | 3.6     | ENSSSCT00000004983 | MYO5B   | intron     | -0.171 | rs792007039   | 2 |
| AGGG.CCCT     | 1 | 109672566 | 109672580 | 3.75    | ENSSSCT00000004990 | SKA1    | intron     | 0.307  | rs789045417   | 2 |
| AAAC.GTTT     | 1 | 109674731 | 109674747 | 4.25    | ENSSSCT00000004990 | SKA1    | intron     | -0.049 | rs791288558   | 2 |
| AT.AT         | 1 | 109742803 | 109742812 | 5       | .                  | .       | intergenic | .      | rs792216251   | 2 |
| AAAC.GTTT     | 1 | 109815609 | 109815627 | 4.75    | .                  | .       | intergenic | .      | rs787939488   | 2 |
| AT.AT         | 1 | 109931016 | 109931030 | 7.5     | .                  | .       | intergenic | .      | rs793540813   | 2 |
| AAAAC.GTTTT   | 1 | 110428109 | 110428131 | 4.6     | .                  | .       | intergenic | .      | 339554 rs7911 | 2 |
| AC.GT         | 1 | 110554404 | 110554420 | 8.5     | ENSSSCT00000004997 | SMAD4   | intron     | .      | rs789540428   | 2 |
| AAAC.GTTT     | 1 | 110567061 | 110567082 | 5.5     | .                  | .       | intergenic | 1.245  | rs787805463   | 2 |
| AC.GT         | 1 | 110601493 | 110601505 | 6.5     | .                  | .       | intergenic | -0.126 | 381936 rs7873 | 3 |
| AAAAG.CTTTT   | 1 | 110739714 | 110739733 | 4       | .                  | .       | intergenic | .      | rs792222964   | 2 |
| AAAC.GTTT     | 1 | 110979348 | 110979366 | 4.75    | .                  | .       | intergenic | 0.109  | rs789912785   | 2 |
| AAAT.ATTT     | 1 | 110989580 | 110989596 | 4.25    | .                  | .       | intergenic | 0.256  | rs792405517   | 2 |
| AT.AT         | 1 | 111321430 | 111321439 | 5       | .                  | .       | intergenic | 0.047  | .             | 4 |
| AC.GT         | 1 | 111333173 | 111333198 | 13      | .                  | .       | intergenic | 0.088  | rs786858880   | 2 |
| AAC.GTT       | 1 | 112151793 | 112151812 | 6.66667 | .                  | .       | intergenic | -0.077 | rs791681359   | 2 |
| AAAC.GTTT     | 1 | 112314873 | 112314904 | 8       | .                  | .       | intergenic | -0.268 | 240740 rs7900 | 2 |
| AC.GT         | 1 | 112485332 | 112485348 | 8.5     | .                  | .       | intergenic | -0.05  | .             | 2 |
| AAAAC.GTTTT   | 1 | 112596416 | 112596438 | 4.6     | .                  | .       | intergenic | -0.096 | 381147 rs7938 | 2 |
| AT.AT         | 1 | 112649623 | 112649640 | 9       | .                  | .       | intergenic | -0.048 | rs789862355   | 2 |
| AC.GT         | 1 | 112876668 | 112876681 | 7       | .                  | .       | intergenic | .      | rs789398152   | 4 |
| AC.GT         | 1 | 113027818 | 113027835 | 9       | .                  | .       | intergenic | 0.145  | rs793145327   | 2 |
| AAT.ATT       | 1 | 113139576 | 113139606 | 10.3333 | .                  | .       | intergenic | .      | 308373 rs7924 | 2 |
| AAAC.GTTT     | 1 | 113307237 | 113307261 | 6.25    | .                  | .       | intergenic | 0.106  | 363540 rs7890 | 2 |
| AAC.GTT       | 1 | 113575862 | 113575884 | 7.66667 | .                  | .       | intergenic | -0.045 | rs790551132   | 2 |
| AAAAAC.GTTTTT | 1 | 113879872 | 113879899 | 4.66667 | .                  | .       | intergenic | 0.268  | rs792590366   | 2 |
| AC.GT         | 1 | 113903797 | 113903807 | 5.5     | .                  | .       | intergenic | -0.14  | .             | 2 |
| AAAC.GTTT     | 1 | 114102739 | 114102752 | 3.5     | .                  | .       | intergenic | -0.025 | 349616 rs7887 | 2 |
| AT.AT         | 1 | 114111969 | 114111978 | 5       | ENSSSCT00000005003 | POLI    | intron     | .      | rs787834152   | 2 |
| AG.CT         | 1 | 114329334 | 114329344 | 5.5     | .                  | .       | intergenic | 0.312  | rs791405627   | 2 |
| AAAAC.GTTTT   | 1 | 114560756 | 114560784 | 5.8     | .                  | .       | intergenic | 0.123  | 182675 rs7873 | 2 |
| AAGG.CCTT     | 1 | 114737550 | 114737562 | 3.25    | ENSSSCT00000005007 | RAB27B  | intron     | 0.031  | rs793709834   | 2 |
| AT.AT         | 1 | 115122403 | 115122413 | 5.5     | ENSSSCT00000036505 | TCF4    | intron     | 0.086  | .             | 2 |
| AT.AT         | 1 | 115122403 | 115122413 | 5.5     | ENSSSCT00000036325 | TCF4    | intron     | 0.086  | .             | 2 |

|                |   |           |           |         |                     |            |            |        |               |   |
|----------------|---|-----------|-----------|---------|---------------------|------------|------------|--------|---------------|---|
| AT.AT          | 1 | 115122403 | 115122413 | 5.5     | ENSSSCT00000005009  | TCF4       | intron     | 0.086  | .             | 2 |
| AAT.ATT        | 1 | 115178667 | 115178679 | 4.33333 | ENSSSCT000000036505 | TCF4       | intron     | 0.117  | .             | 2 |
| AAT.ATT        | 1 | 115178667 | 115178679 | 4.33333 | ENSSSCT000000036325 | TCF4       | intron     | 0.117  | .             | 2 |
| AG.CT          | 1 | 115383141 | 115383152 | 6       | .                   | .          | intergenic | -0.006 | rs789809284   | 2 |
| AAAC.GTTT      | 1 | 115932111 | 115932135 | 6.25    | .                   | .          | intergenic | .      | rs793832595   | 2 |
| AG.CT          | 1 | 117491782 | 117491791 | 5       | ENSSSCT00000005017  | NARS       | promoter   | 0.941  | 746752 rs7863 | 2 |
| AAAC.GTTT      | 1 | 117840938 | 117840966 | 7.25    | ENSSSCT00000005020  | ANKDD1A    | intron     | 0.043  | rs790324971   | 3 |
| AT.AT          | 1 | 118140098 | 118140114 | 8.5     | .                   | .          | intergenic | .      | rs786926125   | 2 |
| ACC.GGT        | 1 | 118302572 | 118302584 | 4.33333 | ENSSSCT00000005027  | ZNF609     | intron     | 0.38   | rs789740323   | 3 |
| AAC.GTT        | 1 | 118358881 | 118358894 | 4.66667 | ENSSSCT00000005027  | ZNF609     | intron     | 0.677  | rs786367323   | 2 |
| AAAG.CTTT      | 1 | 118547522 | 118547544 | 5.75    | .                   | .          | intergenic | .      | 362916 rs7923 | 2 |
| AAG.CTT        | 1 | 118713651 | 118713665 | 5       | ENSSSCT00000005035  | .          | intron     | 0.135  | rs789783703   | 2 |
| AC.GT          | 1 | 118926227 | 118926242 | 8       | ENSSSCT00000005037  | .          | intron     | .      | rs793876140   | 2 |
| AC.GT          | 1 | 119054849 | 119054875 | 13.5    | .                   | .          | intergenic | .      | 365577 rs7931 | 2 |
| AAGG.CCTT      | 1 | 119174347 | 119174364 | 4.5     | .                   | .          | intergenic | -0.09  | rs792695785   | 2 |
| AGG.CCT        | 1 | 120045958 | 120045971 | 4.66667 | .                   | .          | intergenic | -0.138 | rs792798500   | 2 |
| AAG.CTT        | 1 | 120098873 | 120098884 | 4       | .                   | .          | intergenic | .      | rs792332831   | 2 |
| AT.AT          | 1 | 120157050 | 120157060 | 5.5     | .                   | .          | intergenic | .      | rs790021466   | 2 |
| AAAC.GTTT      | 1 | 120284076 | 120284094 | 4.75    | .                   | .          | intergenic | .      | 380168 rs7867 | 2 |
| ACAT.ATGT      | 1 | 120302025 | 120302043 | 4.75    | .                   | .          | intergenic | 0.038  | rs788842614   | 3 |
| AG.CT          | 1 | 120414585 | 120414594 | 5       | .                   | .          | intergenic | -0.005 | rs786398777   | 3 |
| AGGG.CCCT      | 1 | 120461889 | 120461906 | 4.5     | ENSSSCT000000031480 | .          | intron     | -0.092 | .             | 2 |
| AT.AT          | 1 | 120641380 | 120641390 | 5.5     | .                   | .          | intergenic | -0.018 | rs791821700   | 2 |
| AT.AT          | 1 | 120654633 | 120654643 | 5.5     | .                   | .          | intergenic | -0.143 | rs793540228   | 5 |
| AT.AT          | 1 | 121512667 | 121512676 | 5       | ENSSSCT000000028902 | .          | intron     | -0.045 | rs790829188   | 3 |
| AC.GT          | 1 | 121528720 | 121528734 | 7.5     | ENSSSCT000000028902 | .          | 3'utr      | 0.197  | rs788729051   | 2 |
| AAAC.GTTT      | 1 | 121633098 | 121633125 | 7       | .                   | .          | intergenic | -0.006 | rs786810350   | 2 |
| AT.AT          | 1 | 121738649 | 121738660 | 6       | .                   | .          | intergenic | 0.099  | 311292 rs7886 | 2 |
| AC.GT          | 1 | 121807241 | 121807255 | 7.5     | .                   | .          | intergenic | -0.121 | .             | 3 |
| AC.GT          | 1 | 122303330 | 122303345 | 8       | .                   | .          | intergenic | -0.058 | rs786858064   | 8 |
| AAT.ATT        | 1 | 122369258 | 122369277 | 6.66667 | .                   | .          | intergenic | 0.28   | rs792523759   | 2 |
| AGG.CCT        | 1 | 122529827 | 122529847 | 7       | .                   | .          | intergenic | -0.253 | rs789947701   | 2 |
| AT.AT          | 1 | 122664146 | 122664156 | 5.5     | .                   | .          | intergenic | -0.002 | rs790856163   | 3 |
| AG.CT          | 1 | 123304883 | 123304897 | 7.5     | ENSSSCT00000005056  | NARG2      | intron     | .      | rs786862388   | 2 |
| AG.CT          | 1 | 123304883 | 123304897 | 7.5     | ENSSSCT000000025364 | NARG2      | intron     | .      | rs786862388   | 2 |
| \AAAAAC.GTTTTT | 1 | 123313980 | 123314001 | 3.66667 | ENSSSCT00000005056  | NARG2      | intron     | 0.202  | rs793477378   | 2 |
| \AAAAAC.GTTTTT | 1 | 123313980 | 123314001 | 3.66667 | ENSSSCT000000025364 | NARG2      | intron     | 0.202  | rs793477378   | 2 |
| AC.GT          | 1 | 123391935 | 123391952 | 9       | ENSSSCT000000034155 | ANXA2      | intron     | 0.005  | 233630 rs7887 | 2 |
| AC.GT          | 1 | 123391935 | 123391952 | 9       | ENSSSCT00000005057  | ANXA2      | intron     | 0.005  | 233630 rs7887 | 2 |
| AAAT.ATTT      | 1 | 123434676 | 123434696 | 5.25    | .                   | .          | intergenic | -0.097 | rs791372657   | 2 |
| AG.CT          | 1 | 123563826 | 123563837 | 6       | .                   | .          | intergenic | -0.012 | rs786910972   | 2 |
| AAT.ATT        | 1 | 124116134 | 124116151 | 6       | .                   | .          | intergenic | 0.125  | .             | 2 |
| AAC.GTT        | 1 | 124172764 | 124172777 | 4.66667 | .                   | .          | intergenic | -0.046 | rs790093526   | 2 |
| AT.AT          | 1 | 124532099 | 124532127 | 14.5    | .                   | .          | intergenic | .      | rs788644968   | 3 |
| AG.CT          | 1 | 124578472 | 124578482 | 5.5     | ENSSSCT00000005065  | FAM81A     | intron     | -0.064 | rs793475618   | 3 |
| AG.CT          | 1 | 124614557 | 124614568 | 6       | ENSSSCT00000005065  | FAM81A     | intron     | 0.102  | .             | 2 |
| AAAC.GTTT      | 1 | 124660569 | 124660583 | 3.75    | .                   | .          | intergenic | -0.13  | 339523 rs7879 | 2 |
| AAAAT.ATTTT    | 1 | 124664976 | 124664991 | 3.2     | .                   | .          | intergenic | .      | .             | 2 |
| AAAT.ATTT      | 1 | 124698307 | 124698334 | 7       | ENSSSCT00000005066  | MYO1E      | intron     | -0.101 | rs792867664   | 2 |
| AAAC.GTTT      | 1 | 124712766 | 124712788 | 5.75    | ENSSSCT00000005066  | MYO1E      | intron     | 0.418  | rs793746688   | 2 |
| AAAT.ATTT      | 1 | 124763674 | 124763691 | 4.5     | ENSSSCT00000005066  | MYO1E      | intron     | -0.199 | rs786287793   | 2 |
| AAAAC.GTTT     | 1 | 124963871 | 124963894 | 4.8     | ENSSSCT00000005070  | RNF111     | intron     | 0.04   | 269572 rs7862 | 2 |
| AAAC.GTTT      | 1 | 125470996 | 125471013 | 4.5     | .                   | .          | intergenic | 0.074  | .             | 2 |
| AC.GT          | 1 | 125614624 | 125614635 | 6       | ENSSSCT00000005077  | .          | intron     | -0.31  | rs793132949   | 2 |
| ACAG.CTGT      | 1 | 125721839 | 125721859 | 5.25    | .                   | .          | intergenic | -0.05  | rs792165466   | 2 |
| AAAC.GTTT      | 1 | 125964933 | 125964961 | 7.25    | .                   | .          | intergenic | 0.165  | rs790415115   | 2 |
| ACAT.ATGT      | 1 | 126019389 | 126019411 | 5.75    | .                   | .          | intergenic | -0.015 | 381133 rs7917 | 2 |
| AAC.GTT        | 1 | 126097524 | 126097544 | 7       | ENSSSCT000000027950 | ALDH1A2    | intron     | -0.015 | rs790208815   | 2 |
| AT.AT          | 1 | 126160436 | 126160448 | 6.5     | ENSSSCT000000024465 | .          | intron     | 0.67   | rs792298211   | 3 |
| AC.GT          | 1 | 126295054 | 126295082 | 14.5    | .                   | .          | intergenic | 0.393  | rs792205332   | 2 |
| AT.AT          | 1 | 126403488 | 126403498 | 5.5     | .                   | .          | intergenic | .      | rs787419712   | 2 |
| AAC.GTT        | 1 | 126496513 | 126496524 | 4       | ENSSSCT00000005079  | MYZAP      | intron     | 0.137  | rs793097661   | 2 |
| AAAG.CTTT      | 1 | 126553233 | 126553255 | 5.75    | .                   | .          | intergenic | -0.307 | rs792380013   | 3 |
| AAC.GTT        | 1 | 126713586 | 126713608 | 7.66667 | .                   | .          | intergenic | -0.123 | rs786943153   | 2 |
| AAACC.GGTTT    | 1 | 126860915 | 126860946 | 6.4     | ENSSSCT00000005081  | -242-58J12 | intron     | 0.211  | rs790049578   | 2 |
| AAAC.GTTT      | 1 | 126929973 | 126929999 | 6.75    | ENSSSCT00000005081  | -242-58J12 | intron     | .      | rs790042938   | 2 |
| AAAC.GTTT      | 1 | 126929973 | 126929999 | 6.75    | ENSSSCT000000034080 | -242-58J12 | intron     | .      | rs790042938   | 2 |
| AAAC.GTTT      | 1 | 126929973 | 126929999 | 6.75    | ENSSSCT000000035899 | -242-58J12 | intron     | .      | rs790042938   | 2 |
| AAAAT.ATTTT    | 1 | 127061154 | 127061176 | 4.6     | ENSSSCT00000005081  | -242-58J12 | intron     | 0.133  | rs789517459   | 2 |
| \AAAAAC.GTTTTT | 1 | 127531468 | 127531487 | 3.33333 | .                   | .          | intergenic | 0.135  | rs786691686   | 2 |
| AAAC.GTTT      | 1 | 127687551 | 127687567 | 4.25    | ENSSSCT000000028724 | ZNF280D    | intron     | 0.309  | rs787186319   | 2 |
| AAAT.ATTT      | 1 | 128141091 | 128141114 | 6       | .                   | .          | intergenic | .      | rs791534032   | 2 |
| AT.AT          | 1 | 128246359 | 128246369 | 5.5     | ENSSSCT000000029885 | .          | intron     | 0.194  | 154525 rs7879 | 4 |
| AAAG.CTTT      | 1 | 128577153 | 128577169 | 4.25    | .                   | .          | intergenic | -0.144 | .             | 2 |
| AC.GT          | 1 | 128583741 | 128583753 | 6.5     | .                   | .          | intergenic | -0.163 | rs790998674   | 3 |
| AAAT.ATTT      | 1 | 128784833 | 128784855 | 5.75    | ENSSSCT00000005088  | PYGO1      | intron     | 0.09   | rs790598978   | 2 |
| AAC.GTT        | 1 | 129119486 | 129119502 | 5.66667 | ENSSSCT00000005093  | RAB27A     | intron     | .      | rs788469444   | 2 |
| AG.CT          | 1 | 129218734 | 129218746 | 6.5     | .                   | .          | intergenic | 0.209  | 294120 rs7895 | 3 |
| AAAT.ATTT      | 1 | 129278268 | 129278291 | 6       | .                   | .          | intergenic | .      | rs791571327   | 2 |
| AG.CT          | 1 | 129359895 | 129359904 | 5       | .                   | .          | intergenic | 0.579  | rs788337842   | 3 |
| AAGG.CCTT      | 1 | 129616778 | 129616790 | 3.25    | .                   | .          | intergenic | .      | .             | 2 |
| AC.GT          | 1 | 129781445 | 129781455 | 5.5     | .                   | .          | intergenic | 0.181  | rs792314728   | 4 |
| AAAC.GTTT      | 1 | 129792957 | 129792969 | 3.25    | ENSSSCT00000005095  | UNC13C     | intron     | -0.032 | .             | 2 |
| AAC.GTT        | 1 | 129847071 | 129847087 | 5.66667 | ENSSSCT00000005095  | UNC13C     | intron     | .      | .             | 2 |

|             |   |           |           |         |                    |          |            |        |        |             |   |
|-------------|---|-----------|-----------|---------|--------------------|----------|------------|--------|--------|-------------|---|
| AC.GT       | 1 | 129847543 | 129847565 | 11.5    | ENSSSCT00000005095 | UNC13C   | intron     | .      | 352912 | rs7934      | 2 |
| AAAC.GTTT   | 1 | 130088643 | 130088659 | 4.25    | ENSSSCT00000005095 | UNC13C   | intron     | .      |        | rs793329662 | 2 |
| AAAC.GTTT   | 1 | 130088643 | 130088659 | 4.25    | ENSSSCT00000032068 | .        | promoter   | .      |        | rs793329662 | 2 |
| AAAC.GTTT   | 1 | 130278811 | 130278830 | 5       | ENSSSCT00000005095 | UNC13C   | intron     | 0.091  |        | rs792422066 | 3 |
| AAAAG.CTTTT | 1 | 130287302 | 130287316 | 3       | ENSSSCT00000005095 | UNC13C   | intron     | .      |        |             | 2 |
| AAAC.GTTT   | 1 | 130580645 | 130580675 | 7.75    | .                  | .        | intergenic | .      |        | rs789914029 | 2 |
| AC.GT       | 1 | 130684716 | 130684733 | 9       | .                  | .        | intergenic | -0.071 |        | rs793632274 | 2 |
| AAAC.GTTT   | 1 | 130812912 | 130812931 | 5       | ENSSSCT00000005096 | .        | intron     | -0.002 |        | rs791713190 | 2 |
| AAC.GTT     | 1 | 132018054 | 132018072 | 6.33333 | ENSSSCT00000005097 | ONECUT1  | intron     | -0.075 |        | rs786478979 | 2 |
| AAGG.CCTT   | 1 | 132157932 | 132157952 | 5.25    | ENSSSCT00000005098 | FAM214A  | intron     | 0.228  |        |             | 2 |
| ACAT.ATGT   | 1 | 132446344 | 132446370 | 6.75    | ENSSSCT00000005103 | MYO5A    | intron     | 0.009  |        | rs789746199 | 2 |
| AT.AT       | 1 | 132595155 | 132595165 | 5.5     | ENSSSCT00000005104 | MYO5C    | intron     | -0.156 |        | rs792269429 | 3 |
| AAC.GTT     | 1 | 132835053 | 132835077 | 8.33333 | ENSSSCT00000005107 | MAPK6    | intron     | 0.314  | 38225  | rs7902      | 4 |
| AAAAC.GTTTT | 1 | 133098178 | 133098206 | 5.8     | ENSSSCT00000005113 | SCG3     | intron     | 0.184  | 125829 | rs7886      | 4 |
| AAAAC.GTTTT | 1 | 133243899 | 133243921 | 4.6     | ENSSSCT00000005111 | TMOD2    | intron     | 0.282  |        | rs790653184 | 2 |
| AT.AT       | 1 | 133520794 | 133520803 | 5       | ENSSSCT00000005116 | GLDN     | intron     | .      |        |             | 3 |
| AAAC.GTTT   | 1 | 134270026 | 134270039 | 3.5     | .                  | .        | intergenic | .      |        | rs791174336 | 2 |
| AT.AT       | 1 | 134346735 | 134346747 | 6.5     | .                  | .        | intergenic | .      |        | rs793220282 | 2 |
| AACC.GTTT   | 1 | 134366223 | 134366234 | 3       | .                  | .        | intergenic | 0.286  |        |             | 2 |
| AAAAC.GTTTT | 1 | 134424181 | 134424201 | 4.2     | .                  | .        | intergenic | 0.071  |        |             | 2 |
| AC.GT       | 1 | 134501137 | 134501150 | 7       | .                  | .        | intergenic | .      |        | rs793452660 | 2 |
| AC.GT       | 1 | 134627686 | 134627695 | 5       | ENSSSCT00000005121 | TRPM7    | intron     | 0.211  |        |             | 2 |
| AAAC.GTTT   | 1 | 135676894 | 135676914 | 5.25    | .                  | .        | intergenic | 0.124  |        | rs787335075 | 2 |
| ATC.GAT     | 1 | 135912391 | 135912410 | 6.66667 | .                  | .        | intergenic | .      | 364520 | rs7874      | 2 |
| AAAC.GTTT   | 1 | 135920264 | 135920294 | 7.75    | .                  | .        | intergenic | 0.204  |        | rs788332169 | 5 |
| AAC.GTT     | 1 | 136059356 | 136059377 | 7.33333 | .                  | .        | intergenic | .      |        |             | 2 |
| AAC.GTT     | 1 | 136181735 | 136181753 | 6.33333 | ENSSSCT00000005136 | GALK2    | intron     | -0.022 |        | rs792696986 | 2 |
| AC.GT       | 1 | 136226815 | 136226840 | 13      | ENSSSCT00000005136 | GALK2    | intron     | 0.094  |        |             | 2 |
| AC.GT       | 1 | 136281060 | 136281074 | 7.5     | ENSSSCT00000005136 | GALK2    | intron     | 1.519  |        | rs791602164 | 8 |
| AC.GT       | 1 | 136589391 | 136589400 | 5       | ENSSSCT00000005140 | SHC4     | intron     | .      |        |             | 3 |
| AAAT.ATTT   | 1 | 136754175 | 136754202 | 7       | ENSSSCT00000029380 | CEP152   | intron     | 0.087  | 331853 | rs7889      | 2 |
| AAAT.ATTT   | 1 | 136754175 | 136754202 | 7       | ENSSSCT00000005142 | CEP152   | intron     | 0.087  | 331853 | rs7889      | 2 |
| AC.GT       | 1 | 137280383 | 137280397 | 7.5     | ENSSSCT00000005143 | FBN1     | intron     | -0.077 |        | rs791275074 | 3 |
| AAAT.ATTT   | 1 | 137616509 | 137616528 | 5       | .                  | .        | intergenic | 0.176  |        | rs786371088 | 2 |
| AAT.ATT     | 1 | 137658629 | 137658642 | 4.66667 | ENSSSCT00000005147 | MYEF2    | intron     | 0.242  |        | rs791703459 | 2 |
| AAAAC.GTTT  | 1 | 137874450 | 137874464 | 3.75    | .                  | .        | intergenic | .      |        | rs786582093 | 2 |
| AC.GT       | 1 | 137904531 | 137904542 | 6       | .                  | .        | intergenic | .      |        |             | 2 |
| AG.CT       | 1 | 137934728 | 137934743 | 8       | .                  | .        | intergenic | 0.217  | 200224 | rs7936      | 2 |
| AATG.CATT   | 1 | 137975676 | 137975706 | 7.75    | .                  | .        | intergenic | 0.122  |        | rs786525994 | 2 |
| AAAAC.GTTTT | 1 | 138261322 | 138261348 | 5.4     | .                  | .        | intergenic | 0.896  |        | rs791359567 | 2 |
| ATC.GAT     | 1 | 138290999 | 138291016 | 6       | .                  | .        | intergenic | 0.227  |        | rs790469347 | 2 |
| AGG.CCT     | 1 | 138362227 | 138362242 | 5.33333 | .                  | .        | intergenic | 0.923  |        | rs791604818 | 2 |
| AAAC.GTTT   | 1 | 138444536 | 138444550 | 3.75    | .                  | .        | intergenic | 0.009  |        | rs788707269 | 2 |
| AAC.GTT     | 1 | 138454916 | 138454930 | 5       | .                  | .        | intergenic | 0.094  |        | rs791243477 | 2 |
| AT.AT       | 1 | 139008614 | 139008643 | 15      | .                  | .        | intergenic | 0.122  |        | rs704391296 | 2 |
| AC.GT       | 1 | 139252838 | 139252847 | 5       | .                  | .        | intergenic | 0.32   |        |             | 3 |
| AAAAT.ATTTT | 1 | 139328335 | 139328362 | 5.6     | .                  | .        | intergenic | 0.36   | 333318 | rs7869      | 2 |
| AG.CT       | 1 | 139362732 | 139362748 | 8.5     | .                  | .        | intergenic | 0.275  |        | rs789147906 | 2 |
| AT.AT       | 1 | 139363422 | 139363440 | 9.5     | .                  | .        | intergenic | 0.017  |        |             | 2 |
| AG.CT       | 1 | 139393253 | 139393266 | 7       | .                  | .        | intergenic | 0.092  |        |             | 3 |
| AAAG.CTTT   | 1 | 139496192 | 139496207 | 4       | .                  | .        | intergenic | .      | 260431 | rs7906      | 2 |
| AAAC.GTTT   | 1 | 139672521 | 139672544 | 6       | .                  | .        | intergenic | .      |        | rs787578220 | 2 |
| AC.GT       | 1 | 139765876 | 139765885 | 5       | .                  | .        | intergenic | -0.049 |        |             | 2 |
| AC.GT       | 1 | 139946796 | 139946809 | 7       | .                  | .        | intergenic | .      | 123716 | rs7889      | 2 |
| AG.CT       | 1 | 140195013 | 140195022 | 5       | .                  | .        | intergenic | .      |        |             | 3 |
| AAC.GTT     | 1 | 140250250 | 140250267 | 6       | .                  | .        | intergenic | .      |        | rs790189511 | 2 |
| AAAT.ATTT   | 1 | 140351942 | 140351962 | 5.25    | .                  | .        | intergenic | .      |        | rs788051368 | 2 |
| AAAAC.GTTTT | 1 | 140515798 | 140515826 | 5.8     | .                  | .        | intergenic | .      |        | rs703663377 | 2 |
| AAAC.GTTT   | 1 | 140529589 | 140529604 | 4       | .                  | .        | intergenic | .      | 393023 | rs7889      | 2 |
| AT.AT       | 1 | 140898877 | 140898906 | 15      | ENSSSCT00000005157 | SPATA5L1 | intron     | .      |        | rs789898881 | 4 |
| AAGC.GCTT   | 1 | 141068932 | 141068954 | 5.75    | .                  | .        | intergenic | .      |        | rs788614685 | 2 |
| AAAT.ATTT   | 1 | 141114594 | 141114612 | 4.75    | .                  | .        | intergenic | 0.057  |        | rs792509535 | 2 |
| AAAC.GTTT   | 1 | 141205239 | 141205253 | 3.75    | ENSSSCT00000005162 | DUOXA2   | 3'utr      | -0.244 | 174743 | rs7932      | 2 |
| AC.GT       | 1 | 141585216 | 141585226 | 5.5     | .                  | .        | intergenic | .      |        | rs788651008 | 2 |
| AAAC.GTTT   | 1 | 141603737 | 141603751 | 3.75    | ENSSSCT00000028050 | .        | intron     | -0.083 |        | rs792090377 | 2 |
| AAAG.CTTT   | 1 | 141728541 | 141728560 | 5       | ENSSSCT00000025826 | CASC4    | intron     | .      |        | rs792611395 | 2 |
| AAAG.CTTT   | 1 | 141728541 | 141728560 | 5       | ENSSSCT00000005181 | EIF3J    | intron     | .      |        | rs792611395 | 2 |
| AAAG.CTTT   | 1 | 141767356 | 141767374 | 4.75    | ENSSSCT00000025826 | CASC4    | intron     | 0.332  |        | rs793077787 | 2 |
| AAAG.CTTT   | 1 | 141767356 | 141767374 | 4.75    | ENSSSCT00000005180 | CTDSPL2  | intron     | 0.332  |        | rs793077787 | 2 |
| AAGGG.CCCTT | 1 | 141818305 | 141818329 | 5       | ENSSSCT00000025826 | CASC4    | intron     | 0.066  | 95256  | rs7883      | 2 |
| AAG.CTT     | 1 | 141893949 | 141893962 | 4.66667 | ENSSSCT00000025826 | CASC4    | intron     | .      |        | rs790172176 | 2 |
| AAAC.GTTT   | 1 | 141996154 | 141996167 | 3.5     | .                  | .        | intergenic | 0.182  |        | rs787182697 | 2 |
| AAAT.ATTT   | 1 | 142242687 | 142242713 | 6.75    | .                  | .        | intergenic | 0.791  | 779283 | rs7889      | 2 |
| AC.GT       | 1 | 142311289 | 142311303 | 7.5     | .                  | .        | intergenic | .      |        | rs789409078 | 2 |
| AC.GT       | 1 | 142528849 | 142528859 | 5.5     | ENSSSCT00000005185 | WDR76    | intron     | .      |        | rs790891936 | 2 |
| AGC.GCT     | 1 | 142665492 | 142665508 | 5.66667 | ENSSSCT00000005193 | STRC     | cds        | 0.427  |        | rs786894502 | 2 |
| AAC.GTT     | 1 | 142945665 | 142945691 | 9       | ENSSSCT00000005201 | ZSCAN29  | intron     | 0.44   | 339312 | rs7892      | 2 |
| AAAT.ATTT   | 1 | 142963277 | 142963299 | 5.75    | ENSSSCT00000005202 | ADAL     | intron     | .      |        | rs787330722 | 2 |
| AAAAC.GTTTT | 1 | 143054985 | 143055008 | 4.8     | ENSSSCT00000005205 | TGM5     | intron     | 0.194  |        | rs786450617 | 3 |
| AAC.GTT     | 1 | 143123580 | 143123598 | 6.33333 | ENSSSCT00000005206 | EPB42    | intron     | -0.285 |        | rs789279781 | 2 |
| AAAG.CTTT   | 1 | 143270561 | 143270582 | 5.5     | ENSSSCT00000032277 | UBR1     | intron     | 0.4    |        | rs791433863 | 2 |
| AAAG.CTTT   | 1 | 143270561 | 143270582 | 5.5     | ENSSSCT00000005209 | UBR1     | intron     | 0.4    |        | rs791433863 | 2 |
| AAAC.GTTT   | 1 | 143371157 | 143371183 | 6.75    | ENSSSCT00000005210 | TTBK2    | intron     | 0.302  |        | rs793617146 | 2 |
| AAAT.ATTT   | 1 | 143635070 | 143635088 | 4.75    | .                  | .        | intergenic | .      |        | rs791408965 | 2 |

|              |   |           |           |         |                    |          |            |        |               |   |
|--------------|---|-----------|-----------|---------|--------------------|----------|------------|--------|---------------|---|
| AAC.GTT      | 1 | 143643702 | 143643730 | 9.66667 | .                  | .        | intergenic | .      | rs793631431   | 2 |
| \AAAAC.GTTTT | 1 | 143647975 | 143648002 | 4.66667 | .                  | .        | intergenic | 0.197  | rs788085651   | 2 |
| AC.GT        | 1 | 143821806 | 143821820 | 7.5     | ENSSSCT00000005218 | ZNF106   | intron     | 0.253  | 370280 rs7933 | 4 |
| AAAT.ATTT    | 1 | 143942296 | 143942310 | 3.75    | ENSSSCT00000005225 | GANC     | intron     | -0.067 | rs787790810   | 2 |
| AAAC.GTTT    | 1 | 144152998 | 144153025 | 7       | ENSSSCT00000005228 | PLA2G4F  | intron     | -0.184 | 35472 rs7894  | 2 |
| AAC.GTT      | 1 | 144249755 | 144249772 | 6       | .                  | .        | intergenic | .      | rs787067792   | 2 |
| AAAC.GTTT    | 1 | 144510463 | 144510487 | 6.25    | ENSSSCT00000005234 | .        | intron     | 0.329  | 333439 rs7903 | 2 |
| AAAC.GTTT    | 1 | 144510463 | 144510487 | 6.25    | ENSSSCT00000005241 | .        | intron     | 0.329  | 333439 rs7903 | 2 |
| AAAAT.ATTTT  | 1 | 144627944 | 144627959 | 3.2     | ENSSSCT00000022785 | EHD4     | intron     | .      | rs786843519   | 2 |
| AGGG.CCCT    | 1 | 145026193 | 145026207 | 3.75    | .                  | .        | intergenic | 0.122  | rs788609414   | 2 |
| AAAG.CTTT    | 1 | 146176423 | 146176445 | 5.75    | .                  | .        | intergenic | .      | 102095 rs7933 | 2 |
| .GATCC.GGATC | 1 | 146181902 | 146181923 | 3.66667 | .                  | .        | intergenic | -0.084 | 127303 rs7937 | 2 |
| AT.AT        | 1 | 146665914 | 146665926 | 6.5     | ENSSSCT00000005286 | GPR176   | intron     | 0.361  | 308044 rs7109 | 4 |
| AAT.ATT      | 1 | 146773948 | 146773964 | 5.66667 | .                  | .        | intergenic | 0.136  | rs793051324   | 2 |
| AAACT.AGTTT  | 1 | 146979366 | 146979382 | 3.4     | .                  | .        | intergenic | .      | rs787257115   | 2 |
| AAAC.GTTT    | 1 | 147033637 | 147033656 | 5       | .                  | .        | intergenic | 0.128  | rs790405531   | 2 |
| AAAAC.GTTTT  | 1 | 147142239 | 147142263 | 5       | .                  | .        | intergenic | -0.164 | rs788624398   | 2 |
| AAAAC.GTTTT  | 1 | 147199769 | 147199789 | 4.2     | .                  | .        | intergenic | 0.044  | rs789568756   | 2 |
| AT.AT        | 1 | 147331572 | 147331582 | 5.5     | .                  | .        | intergenic | 0.216  | rs793015433   | 2 |
| AAAC.GTTT    | 1 | 147366943 | 147366965 | 5.75    | .                  | .        | intergenic | 0.272  | rs793063140   | 2 |
| AAAAC.GTTTT  | 1 | 147371381 | 147371399 | 3.8     | .                  | .        | intergenic | 0.322  | rs790611037   | 2 |
| AAT.ATT      | 1 | 147375806 | 147375819 | 4.66667 | .                  | .        | intergenic | .      | .             | 3 |
| AAG.CTT      | 1 | 147387886 | 147387903 | 6       | .                  | .        | intergenic | 0.104  | rs788860185   | 2 |
| AATG.CATT    | 1 | 147950123 | 147950150 | 7       | .                  | .        | intergenic | 0.009  | rs788041245   | 2 |
| AATG.CATT    | 1 | 148493013 | 148493035 | 5.75    | ENSSSCT00000005292 | SPRED1   | intron     | 0.139  | rs790577236   | 2 |
| AT.AT        | 1 | 148499712 | 148499721 | 5       | .                  | .        | intergenic | 0.173  | .             | 2 |
| AG.CT        | 1 | 148518103 | 148518119 | 8.5     | .                  | .        | intergenic | .      | .             | 2 |
| \AAAAG.CTTTT | 1 | 148597037 | 148597071 | 5.83333 | .                  | .        | intergenic | 0.276  | rs786372638   | 2 |
| AAC.GTT      | 1 | 148753162 | 148753178 | 5.66667 | .                  | .        | intergenic | .      | rs791863593   | 2 |
| AT.AT        | 1 | 148819045 | 148819055 | 5.5     | ENSSSCT00000005293 | TMCO5A   | intron     | 0.135  | rs789973232   | 2 |
| AG.CT        | 1 | 148888633 | 148888647 | 7.5     | .                  | .        | intergenic | 2.815  | .             | 3 |
| AT.AT        | 1 | 148931206 | 148931233 | 14      | .                  | .        | intergenic | 0.234  | rs788910442   | 2 |
| AC.GT        | 1 | 148957124 | 148957140 | 8.5     | .                  | .        | intergenic | 3.645  | 323640 rs7884 | 2 |
| AT.AT        | 1 | 149047892 | 149047905 | 7       | .                  | .        | intergenic | 0.482  | rs788309855   | 2 |
| AT.AT        | 1 | 149076683 | 149076695 | 6.5     | .                  | .        | intergenic | 0.169  | rs786335864   | 2 |
| AG.CT        | 1 | 149597650 | 149597659 | 5       | .                  | .        | intergenic | .      | .             | 2 |
| AT.AT        | 1 | 149637454 | 149637467 | 7       | .                  | .        | intergenic | 0.2    | rs792735777   | 3 |
| AAAAC.GTTTT  | 1 | 149796299 | 149796321 | 4.6     | .                  | .        | intergenic | 0.375  | .             | 2 |
| AC.GT        | 1 | 149853167 | 149853176 | 5       | .                  | .        | intergenic | 1.314  | .             | 3 |
| AC.GT        | 1 | 150238861 | 150238873 | 6.5     | .                  | .        | intergenic | 1.888  | rs793145154   | 2 |
| AAAT.ATTT    | 1 | 150251839 | 150251854 | 4       | .                  | .        | intergenic | 0.621  | rs791163837   | 2 |
| AAAAC.GTTTT  | 1 | 150254564 | 150254587 | 4.8     | .                  | .        | intergenic | 0.412  | rs787388315   | 2 |
| AAAAC.GTTTT  | 1 | 150293785 | 150293813 | 5.8     | .                  | .        | intergenic | 0.435  | rs787846915   | 2 |
| AAAC.GTTT    | 1 | 150308264 | 150308278 | 3.75    | .                  | .        | intergenic | 0.074  | rs790636657   | 2 |
| AAAT.ATTT    | 1 | 150620332 | 150620349 | 4.5     | .                  | .        | intergenic | 0.131  | rs786997038   | 2 |
| AAT.ATT      | 1 | 151009854 | 151009867 | 4.66667 | .                  | .        | intergenic | .      | .             | 2 |
| AT.AT        | 1 | 151019445 | 151019478 | 17      | .                  | .        | intergenic | .      | .             | 3 |
| AAC.GTT      | 1 | 151143794 | 151143810 | 5.66667 | .                  | .        | intergenic | 0.155  | rs790501882   | 2 |
| AG.CT        | 1 | 151325689 | 151325700 | 6       | .                  | .        | intergenic | .      | rs791304498   | 2 |
| AC.GT        | 1 | 151536059 | 151536076 | 9       | .                  | .        | intergenic | 0.19   | .             | 4 |
| AAAAC.GTTTT  | 1 | 151791751 | 151791775 | 5       | ENSSSCT00000029836 | DPH6     | intron     | 0.067  | 134360 rs7862 | 2 |
| AC.GT        | 1 | 151859918 | 151859928 | 5.5     | .                  | .        | intergenic | .      | rs790169309   | 2 |
| AC.GT        | 1 | 151861239 | 151861248 | 5       | .                  | .        | intergenic | .      | .             | 4 |
| AAC.GTT      | 1 | 151885423 | 151885442 | 6.66667 | .                  | .        | intergenic | 0.485  | .             | 3 |
| AG.CT        | 1 | 151935641 | 151935660 | 10      | .                  | .        | intergenic | 0.176  | rs786736069   | 2 |
| \AAAAT.ATTTT | 1 | 152097439 | 152097461 | 3.83333 | .                  | .        | intergenic | -0.106 | rs786658485   | 2 |
| \AAAAC.GTTTT | 1 | 152342234 | 152342272 | 6.5     | ENSSSCT00000005301 | .        | intron     | 0.146  | rs791149149   | 2 |
| AC.GT        | 1 | 152599168 | 152599177 | 5       | .                  | .        | intergenic | .      | rs789623042   | 2 |
| AAAT.ATTT    | 1 | 152635065 | 152635082 | 4.5     | ENSSSCT00000005305 | \RHGAP11 | cds        | .      | rs788980568   | 2 |
| AAAT.ATTT    | 1 | 152635065 | 152635082 | 4.5     | ENSSSCT00000005305 | \RHGAP11 | intron     | .      | rs788980568   | 2 |
| AT.AT        | 1 | 152873848 | 152873857 | 5       | .                  | .        | intergenic | 0.359  | rs789410452   | 4 |
| AC.GT        | 1 | 153145273 | 153145296 | 12      | .                  | .        | intergenic | 0.442  | rs791222687   | 4 |
| AC.GT        | 1 | 153158181 | 153158196 | 8       | .                  | .        | intergenic | 0.126  | rs790240910   | 2 |
| AAAC.GTTT    | 1 | 153247867 | 153247885 | 4.75    | .                  | .        | intergenic | 0.134  | rs788230104   | 2 |
| AC.GT        | 1 | 153321263 | 153321282 | 10      | ENSSSCT00000030424 | FAM169B  | intron     | 0.068  | .             | 4 |
| AAAAG.CTTTT  | 1 | 153386424 | 153386438 | 3       | .                  | .        | intergenic | .      | rs789797939   | 2 |
| AAAC.GTTT    | 1 | 153486451 | 153486463 | 3.25    | ENSSSCT00000005310 | PGPEP1L  | intron     | .      | rs793678263   | 2 |
| AC.GT        | 1 | 153625926 | 153625939 | 7       | ENSSSCT00000005311 | IGF1R    | intron     | 0.067  | 221873 rs7882 | 2 |
| AAAC.GTTT    | 1 | 153733206 | 153733225 | 5       | ENSSSCT00000005311 | IGF1R    | intron     | -0.036 | rs786556133   | 2 |
| AC.GT        | 1 | 153969007 | 153969021 | 7.5     | .                  | .        | intergenic | 0.007  | rs786789619   | 2 |
| AAAC.GTTT    | 1 | 154048315 | 154048335 | 5.25    | .                  | .        | intergenic | -0.069 | 18950 rs7902  | 2 |
| AG.CT        | 1 | 154078047 | 154078058 | 6       | ENSSSCT00000005313 | TTC23    | intron     | -0.056 | 357375 rs7935 | 2 |
| AAAC.GTTT    | 1 | 154151676 | 154151699 | 6       | ENSSSCT00000005313 | TTC23    | intron     | .      | rs788508336   | 2 |
| AC.GT        | 1 | 154310111 | 154310124 | 7       | ENSSSCT00000005314 | LRRRC28  | intron     | .      | rs791650790   | 2 |
| AT.AT        | 1 | 154725207 | 154725218 | 6       | .                  | .        | intergenic | .      | rs790361806   | 2 |
| AAC.GTT      | 1 | 154815235 | 154815249 | 5       | .                  | .        | intergenic | 0.078  | rs793613062   | 2 |
| AAAAG.CTTTT  | 1 | 154902756 | 154902782 | 5.4     | .                  | .        | intergenic | -0.172 | rs789912694   | 2 |
| AAAC.GTTT    | 1 | 155027752 | 155027770 | 4.75    | .                  | .        | intergenic | -0.249 | 392711 rs7870 | 2 |
| AT.AT        | 1 | 155872821 | 155872832 | 6       | .                  | .        | intergenic | -0.012 | 142507 rs7938 | 3 |
| AAAC.GTTT    | 1 | 155879448 | 155879469 | 5.5     | .                  | .        | intergenic | .      | rs793371509   | 2 |
| AAAC.GTTT    | 1 | 155924299 | 155924311 | 3.25    | .                  | .        | intergenic | -0.007 | rs788910619   | 2 |
| AAAAC.GTTTT  | 1 | 155974660 | 155974683 | 4.8     | ENSSSCT00000005327 | CHSY1    | intron     | -0.001 | rs790703459   | 2 |
| AT.AT        | 1 | 156046282 | 156046292 | 5.5     | .                  | .        | intergenic | .      | 310590 rs7872 | 3 |
| AG.CT        | 1 | 156445683 | 156445697 | 7.5     | .                  | .        | intergenic | .      | .             | 2 |

|               |   |           |           |         |                     |        |            |        |              |   |
|---------------|---|-----------|-----------|---------|---------------------|--------|------------|--------|--------------|---|
| AAAC.GTTT     | 1 | 156538581 | 156538594 | 3.5     | .                   | .      | intergenic | .      | rs786470848  | 3 |
| AT.AT         | 1 | 156577123 | 156577149 | 13.5    | .                   | .      | intergenic | .      | rs791157969  | 2 |
| AAC.GTT       | 1 | 156723902 | 156723918 | 5.66667 | .                   | .      | intergenic | -0.198 | rs789733672  | 2 |
| AG.CT         | 1 | 157336713 | 157336730 | 9       | .                   | .      | intergenic | 0.062  | rs790244316  | 2 |
| AG.CT         | 1 | 157562807 | 157562817 | 5.5     | .                   | .      | intergenic | 0.088  | rs788438470  | 2 |
| AG.CT         | 1 | 157602843 | 157602856 | 7       | .                   | .      | intergenic | .      | .            | 2 |
| AGATAT.ATATC  | 1 | 157603016 | 157603036 | 3.5     | .                   | .      | intergenic | .      | rs7897346068 | 2 |
| AAAT.ATTT     | 1 | 158189442 | 158189466 | 6.25    | .                   | .      | intergenic | .      | rs789332202  | 2 |
| AC.GT         | 1 | 158252861 | 158252875 | 7.5     | .                   | .      | intergenic | .      | .            | 4 |
| AAAC.GTTT     | 1 | 158355549 | 158355573 | 6.25    | .                   | .      | intergenic | .      | rs793429476  | 2 |
| AT.AT         | 1 | 158430195 | 158430205 | 5.5     | .                   | .      | intergenic | .      | rs788057471  | 2 |
| AC.GT         | 1 | 158532975 | 158532987 | 6.5     | .                   | .      | intergenic | .      | rs788731524  | 2 |
| AAAC.GTTT     | 1 | 158802221 | 158802254 | 8.5     | .                   | .      | intergenic | .      | rs790699565  | 2 |
| AC.GT         | 1 | 158826152 | 158826166 | 7.5     | .                   | .      | intergenic | .      | .            | 7 |
| AAAC.GTTT     | 1 | 158953479 | 158953505 | 6.75    | .                   | .      | intergenic | .      | rs790236687  | 2 |
| AAAAC.GTTTT   | 1 | 159078067 | 159078086 | 4       | .                   | .      | intergenic | .      | rs790362289  | 2 |
| AAAC.GTTT     | 1 | 159347439 | 159347462 | 6       | ENSSSCT00000005342  | OTUD7A | intron     | .      | rs792550873  | 2 |
| AAAG.CTTT     | 1 | 159461779 | 159461801 | 5.75    | ENSSSCT000000032440 | KLF13  | intron     | .      | rs790639506  | 2 |
| AC.GT         | 1 | 160199442 | 160199452 | 5.5     | ENSSSCT00000005353  | APBA2  | intron     | 0.251  | rs790568248  | 3 |
| AC.GT         | 1 | 160199442 | 160199452 | 5.5     | ENSSSCT00000022624  | .      | promoter   | 0.251  | rs790568248  | 3 |
| AC.GT         | 1 | 160726571 | 160726587 | 8.5     | .                   | .      | intergenic | -0.137 | rs786723885  | 2 |
| AT.AT         | 1 | 161566603 | 161566618 | 8       | ENSSSCT00000005362  | NFATC1 | intron     | .      | rs788854904  | 2 |
| AAAC.GTTT     | 1 | 161601430 | 161601450 | 5.25    | ENSSSCT00000005362  | NFATC1 | intron     | .      | rs790337423  | 2 |
| AAAC.GTTT     | 1 | 161601430 | 161601450 | 5.25    | ENSSSCT00000005360  | ATP9B  | intron     | .      | rs790337423  | 2 |
| AAAC.GTTT     | 1 | 161601430 | 161601450 | 5.25    | ENSSSCT00000005363  | ATP9B  | intron     | .      | rs790337423  | 2 |
| AAAC.GTTT     | 1 | 161672512 | 161672524 | 3.25    | ENSSSCT00000005360  | ATP9B  | intron     | .      | rs791089037  | 2 |
| AAAC.GTTT     | 1 | 161672512 | 161672524 | 3.25    | ENSSSCT00000005363  | ATP9B  | intron     | .      | rs791089037  | 2 |
| AG.CT         | 1 | 161737307 | 161737317 | 5.5     | ENSSSCT00000005360  | ATP9B  | intron     | .      | rs788364538  | 2 |
| AG.CT         | 1 | 161737307 | 161737317 | 5.5     | ENSSSCT00000005363  | ATP9B  | intron     | .      | rs788364538  | 2 |
| AG.CT         | 1 | 162682422 | 162682440 | 9.5     | .                   | .      | intergenic | .      | rs7889340763 | 2 |
| AG.CT         | 1 | 162690223 | 162690243 | 10.5    | .                   | .      | intergenic | -0.281 | .            | 3 |
| AAAC.GTTT     | 1 | 162937743 | 162937765 | 5.75    | .                   | .      | intergenic | -0.227 | rs788277955  | 2 |
| AAT.ATT       | 1 | 163035112 | 163035134 | 7.66667 | .                   | .      | intergenic | -0.242 | rs791111207  | 2 |
| AAC.GTT       | 1 | 163066837 | 163066855 | 6.33333 | .                   | .      | intergenic | .      | rs7863367397 | 2 |
| AAAT.ATTT     | 1 | 163287225 | 163287246 | 5.5     | ENSSSCT000000025136 | .      | intron     | 0.012  | rs789276387  | 2 |
| AAAAAT.ATTTTT | 1 | 163389289 | 163389308 | 3.33333 | .                   | .      | intergenic | .      | rs7886383864 | 2 |
| AC.GT         | 1 | 163439034 | 163439047 | 7       | .                   | .      | intergenic | -0.045 | rs7917326020 | 2 |
| AC.GT         | 1 | 163571655 | 163571667 | 6.5     | .                   | .      | intergenic | .      | .            | 3 |
| AAAGC.GCTTT   | 1 | 163944029 | 163944055 | 4.5     | ENSSSCT00000005365  | ZNF516 | intron     | -0.519 | rs690563562  | 2 |
| AAAC.GTTT     | 1 | 163965180 | 163965208 | 7.25    | .                   | .      | intergenic | -0.081 | rs7905732906 | 2 |
| AT.AT         | 1 | 164092182 | 164092191 | 5       | .                   | .      | intergenic | .      | .            | 3 |
| AC.GT         | 1 | 164196505 | 164196516 | 6       | .                   | .      | intergenic | 0.062  | rs792770799  | 2 |
| AAAC.GTTT     | 1 | 164254714 | 164254744 | 7.75    | .                   | .      | intergenic | 0.926  | rs692494150  | 2 |
| AAAT.ATTT     | 1 | 164338445 | 164338464 | 5       | .                   | .      | intergenic | .      | rs793443539  | 2 |
| AAAC.GTTT     | 1 | 164348524 | 164348550 | 6.75    | .                   | .      | intergenic | 0.421  | .            | 2 |
| AT.AT         | 1 | 164459041 | 164459050 | 5       | .                   | .      | intergenic | -0.123 | rs787864527  | 2 |
| AAAC.GTTT     | 1 | 164461132 | 164461146 | 3.75    | .                   | .      | intergenic | .      | rs7913242823 | 2 |
| ATC.GAT       | 1 | 164798142 | 164798178 | 12.3333 | .                   | .      | intergenic | -0.351 | rs790802063  | 2 |
| AGGG.CCCT     | 1 | 165233636 | 165233653 | 4.5     | .                   | .      | intergenic | -0.203 | .            | 2 |
| AAAC.GTTT     | 1 | 165511379 | 165511401 | 5.75    | .                   | .      | intergenic | -0.211 | rs792904995  | 2 |
| AAAAC.GTTTT   | 1 | 165581724 | 165581751 | 5.6     | ENSSSCT00000005375  | CNDP1  | intron     | -0.064 | rs790475319  | 2 |
| AGG.CCT       | 1 | 166065938 | 166065950 | 4.33333 | ENSSSCT00000005379  | FBXO15 | intron     | -0.347 | .            | 2 |
| AG.CT         | 1 | 166159160 | 166159188 | 14.5    | .                   | .      | intergenic | -0.289 | rs7912368285 | 2 |
| AAG.CTT       | 1 | 166244280 | 166244310 | 10.3333 | .                   | .      | intergenic | -0.063 | rs789603253  | 2 |
| AC.GT         | 1 | 166285160 | 166285176 | 8.5     | .                   | .      | intergenic | -0.128 | .            | 3 |
| AAAC.GTTT     | 1 | 166481782 | 166481797 | 4       | .                   | .      | intergenic | .      | rs7874797450 | 2 |
| AAAAT.ATTTT   | 1 | 166869375 | 166869398 | 4.8     | .                   | .      | intergenic | .      | rs791842718  | 2 |
| AATG.CATT     | 1 | 167122718 | 167122741 | 6       | .                   | .      | intergenic | -0.176 | rs793483334  | 2 |
| AT.AT         | 1 | 167279724 | 167279734 | 5.5     | .                   | .      | intergenic | -0.186 | .            | 2 |
| AAAAT.ATTTT   | 1 | 167405203 | 167405229 | 5.4     | .                   | .      | intergenic | .      | rs7916338381 | 2 |
| AT.AT         | 1 | 167882325 | 167882345 | 10.5    | .                   | .      | intergenic | .      | .            | 2 |
| AC.GT         | 1 | 168133223 | 168133242 | 10      | .                   | .      | intergenic | -0.043 | .            | 4 |
| AAAAT.ATTTT   | 1 | 168171992 | 168172011 | 4       | .                   | .      | intergenic | 0.07   | rs7936347078 | 2 |
| AT.AT         | 1 | 168198082 | 168198094 | 6.5     | .                   | .      | intergenic | 0.056  | rs7894523928 | 3 |
| AAT.ATT       | 1 | 168232363 | 168232380 | 6       | .                   | .      | intergenic | .      | rs789925926  | 2 |
| AG.CT         | 1 | 168601575 | 168601584 | 5       | .                   | .      | intergenic | -0.263 | .            | 3 |
| AC.GT         | 1 | 168776246 | 168776259 | 7       | .                   | .      | intergenic | 0.045  | rs7035381612 | 2 |
| AC.GT         | 1 | 169146782 | 169146793 | 6       | .                   | .      | intergenic | 0.371  | rs789118399  | 2 |
| AC.GT         | 1 | 169876852 | 169876866 | 7.5     | .                   | .      | intergenic | -0.131 | rs790362646  | 2 |
| AT.AT         | 1 | 170038296 | 170038308 | 6.5     | .                   | .      | intergenic | -0.314 | rs793800538  | 2 |
| AG.CT         | 1 | 170171635 | 170171651 | 8.5     | .                   | .      | intergenic | -0.039 | .            | 4 |
| AAAC.GTTT     | 1 | 170321890 | 170321916 | 6.75    | .                   | .      | intergenic | 0.02   | rs791733318  | 2 |
| AAAAAT.ATTTTT | 1 | 170341859 | 170341883 | 4.16667 | .                   | .      | intergenic | -0.04  | rs7895742635 | 2 |
| AAT.ATT       | 1 | 170448568 | 170448597 | 10      | .                   | .      | intergenic | .      | rs786603503  | 2 |
| AG.CT         | 1 | 170454081 | 170454093 | 6.5     | .                   | .      | intergenic | 0.294  | rs787415394  | 2 |
| AC.GT         | 1 | 170464352 | 170464367 | 8       | .                   | .      | intergenic | -0.048 | rs788828961  | 2 |
| AC.GT         | 1 | 170518582 | 170518591 | 5       | .                   | .      | intergenic | .      | rs789951961  | 2 |
| AGAT.ATCT     | 1 | 170528236 | 170528250 | 3.75    | .                   | .      | intergenic | -0.311 | rs788810646  | 2 |
| AC.GT         | 1 | 170565703 | 170565723 | 10.5    | .                   | .      | intergenic | 0.188  | rs790139300  | 2 |
| AAC.GTT       | 1 | 170768783 | 170768798 | 5.33333 | ENSSSCT00000005390  | TMX3   | intron     | 0.91   | rs791581063  | 2 |
| AAG.CTT       | 1 | 170847703 | 170847719 | 5.66667 | .                   | .      | intergenic | 0.04   | rs787435088  | 3 |
| AT.AT         | 1 | 170854504 | 170854515 | 6       | .                   | .      | intergenic | -0.161 | rs7900315644 | 2 |
| AT.AT         | 1 | 170858462 | 170858474 | 6.5     | .                   | .      | intergenic | .      | rs7889398456 | 2 |
| AGG.CCT       | 1 | 170865338 | 170865353 | 5.33333 | .                   | .      | intergenic | .      | rs793685331  | 2 |



|             |   |           |           |         |                    |          |            |        |                 |   |
|-------------|---|-----------|-----------|---------|--------------------|----------|------------|--------|-----------------|---|
| AT.AT       | 1 | 171350655 | 171350666 | 6       | .                  | .        | intergenic | .      | .               | 4 |
| AC.GT       | 1 | 171353292 | 171353305 | 7       | .                  | .        | intergenic | -0.042 | .               | 4 |
| AAAAT.ATTTT | 1 | 171694381 | 171694401 | 4.2     | .                  | .        | intergenic | .      | rs793207176     | 2 |
| AAAAT.ATTTT | 1 | 171789096 | 171789119 | 4.8     | .                  | .        | intergenic | -0.038 | rs29074 rs7935  | 2 |
| AAAT.ATTT   | 1 | 171790761 | 171790789 | 7.25    | .                  | .        | intergenic | .      | rs37287 rs7899  | 2 |
| AAAC.GTTT   | 1 | 171840646 | 171840657 | 3       | .                  | .        | intergenic | .      | rs786880792     | 2 |
| AG.CT       | 1 | 171896511 | 171896523 | 6.5     | .                  | .        | intergenic | -0.045 | rs73178 rs7865  | 2 |
| AAAAC.GTTTT | 1 | 172001952 | 172001969 | 3.6     | .                  | .        | intergenic | .      | .               | 2 |
| AC.GT       | 1 | 172507364 | 172507386 | 11.5    | .                  | .        | intergenic | -0.117 | rs788505708     | 2 |
| AC.GT       | 1 | 172968941 | 172968970 | 15      | ENSSSCT0000005391  | CDH19    | intron     | .      | .               | 2 |
| AAC.GTT     | 1 | 173066013 | 173066026 | 4.66667 | .                  | .        | intergenic | -0.136 | rs787918431     | 2 |
| AT.AT       | 1 | 173101498 | 173101509 | 6       | .                  | .        | intergenic | 0.309  | rs787999112     | 3 |
| AAAAC.GTTTT | 1 | 173147904 | 173147923 | 4       | .                  | .        | intergenic | -0.079 | .               | 2 |
| AT.AT       | 1 | 173147987 | 173147997 | 5.5     | .                  | .        | intergenic | -0.014 | rs791475690     | 2 |
| AAAG.CTTT   | 1 | 173159897 | 173159934 | 9.5     | .                  | .        | intergenic | .      | rs788185469     | 3 |
| AT.AT       | 1 | 173221795 | 173221820 | 13      | .                  | .        | intergenic | 0.116  | rs116357 rs7902 | 2 |
| AAAC.GTTT   | 1 | 173232072 | 173232083 | 3       | .                  | .        | intergenic | .      | rs313978 rs7907 | 2 |
| AC.GT       | 1 | 173307841 | 173307851 | 5.5     | .                  | .        | intergenic | -0.001 | rs707616 rs7919 | 2 |
| AAT.ATT     | 1 | 173448163 | 173448174 | 4       | .                  | .        | intergenic | -0.093 | rs789704377     | 2 |
| AAAT.ATTT   | 1 | 173574612 | 173574624 | 3.25    | .                  | .        | intergenic | 0.298  | rs789574028     | 2 |
| AAAAC.GTTTT | 1 | 173924154 | 173924170 | 3.4     | .                  | .        | intergenic | -0.079 | .               | 2 |
| AAAT.ATTT   | 1 | 173929750 | 173929769 | 5       | .                  | .        | intergenic | .      | rs791642673     | 2 |
| AT.AT       | 1 | 174292009 | 174292022 | 7       | .                  | .        | intergenic | .      | rs347431 rs7936 | 2 |
| AAAC.GTTT   | 1 | 174348080 | 174348103 | 6       | .                  | .        | intergenic | -0.133 | rs746845 rs7897 | 2 |
| AT.AT       | 1 | 174354756 | 174354766 | 5.5     | .                  | .        | intergenic | -0.054 | rs787073884     | 2 |
| AAAAC.GTTTT | 1 | 174590982 | 174591009 | 5.6     | .                  | .        | intergenic | .      | rs790203361     | 2 |
| AC.GT       | 1 | 174899125 | 174899154 | 15      | .                  | .        | intergenic | 0.093  | rs793217450     | 2 |
| AT.AT       | 1 | 174971280 | 174971291 | 6       | .                  | .        | intergenic | .      | rs304696 rs7928 | 2 |
| AC.GT       | 1 | 174974799 | 174974809 | 5.5     | .                  | .        | intergenic | -0.121 | .               | 2 |
| AT.AT       | 1 | 175084494 | 175084506 | 6.5     | .                  | .        | intergenic | 0.054  | rs375316 rs7869 | 2 |
| AG.CT       | 1 | 175498517 | 175498526 | 5       | .                  | .        | intergenic | -0.116 | rs791138280     | 2 |
| AAAAC.GTTTT | 1 | 176062518 | 176062542 | 5       | .                  | .        | intergenic | 0.114  | rs790528443     | 2 |
| AAAC.GTTT   | 1 | 176071265 | 176071288 | 6       | .                  | .        | intergenic | 0.086  | rs791904300     | 2 |
| AC.GT       | 1 | 176254328 | 176254341 | 7       | .                  | .        | intergenic | 0.173  | rs791711792     | 2 |
| AC.GT       | 1 | 176450792 | 176450819 | 14      | .                  | .        | intergenic | .      | rs786301829     | 3 |
| AAAC.GTTT   | 1 | 176522062 | 176522076 | 3.75    | .                  | .        | intergenic | 0.238  | rs791968880     | 2 |
| AAAC.GTTT   | 1 | 176608228 | 176608246 | 4.75    | ENSSSCT00000028414 | NFRSF11  | intron     | 0.236  | rs786887881     | 2 |
| AAAC.GTTT   | 1 | 176608228 | 176608246 | 4.75    | ENSSSCT0000005404  | NFRSF11  | intron     | 0.236  | rs786887881     | 2 |
| AC.GT       | 1 | 176652757 | 176652767 | 5.5     | .                  | .        | intergenic | -0.005 | rs793039609     | 3 |
| AT.AT       | 1 | 176693494 | 176693505 | 6       | ENSSSCT0000005405  | KIAA1468 | intron     | 0.19   | rs787342210     | 2 |
| AAAC.GTTT   | 1 | 176727809 | 176727827 | 4.75    | ENSSSCT0000005405  | KIAA1468 | intron     | 0.199  | rs788429704     | 2 |
| AC.GT       | 1 | 176764225 | 176764243 | 9.5     | ENSSSCT0000005405  | KIAA1468 | intron     | .      | rs790591 rs7871 | 3 |
| AAAAG.CTTTT | 1 | 177231963 | 177231988 | 5.2     | .                  | .        | intergenic | 0.237  | rs786808743     | 3 |
| AAAAT.ATTTT | 1 | 177287503 | 177287532 | 6       | .                  | .        | intergenic | .      | rs310110 rs7913 | 2 |
| AAAAC.GTTTT | 1 | 177740137 | 177740160 | 4.8     | .                  | .        | intergenic | -0.05  | rs787373162     | 2 |
| AAT.ATT     | 1 | 178101164 | 178101185 | 7.33333 | .                  | .        | intergenic | 0.732  | .               | 4 |
| AAT.ATT     | 1 | 178202438 | 178202451 | 4.66667 | .                  | .        | intergenic | 0.04   | rs366211 rs7902 | 2 |
| AG.CT       | 1 | 178292479 | 178292491 | 6.5     | .                  | .        | intergenic | .      | rs788486597     | 2 |
| AAAC.GTTT   | 1 | 178309217 | 178309234 | 4.5     | .                  | .        | intergenic | 0.042  | rs305324 rs7916 | 2 |
| AC.GT       | 1 | 178491253 | 178491271 | 9.5     | .                  | .        | intergenic | 0.108  | .               | 3 |
| AC.GT       | 1 | 178567203 | 178567216 | 7       | .                  | .        | intergenic | 0.016  | rs793326887     | 2 |
| AAAC.GTTT   | 1 | 178571671 | 178571698 | 7       | .                  | .        | intergenic | -0.008 | rs712428425     | 3 |
| AG.CT       | 1 | 178725070 | 178725089 | 10      | .                  | .        | intergenic | .      | rs298765 rs7913 | 2 |
| AT.AT       | 1 | 178736924 | 178736936 | 6.5     | .                  | .        | intergenic | 0.213  | rs786672848     | 2 |
| AC.GT       | 1 | 178996543 | 178996558 | 8       | ENSSSCT0000005413  | CCBE1    | intron     | 0.165  | rs757324 rs7929 | 2 |
| AC.GT       | 1 | 179084651 | 179084670 | 10      | ENSSSCT0000005413  | CCBE1    | intron     | -0.031 | rs137573 rs7937 | 3 |
| ACAG.CTGT   | 1 | 179187730 | 179187748 | 4.75    | ENSSSCT0000005415  | LMAN1    | intron     | 0.055  | .               | 2 |
| AAAC.GTTT   | 1 | 179332717 | 179332739 | 5.75    | ENSSSCT0000005418  | .        | intron     | -0.114 | rs308942 rs7880 | 2 |
| AAAC.GTTT   | 1 | 179466820 | 179466851 | 8       | .                  | .        | intergenic | -0.054 | rs790535280     | 2 |
| AAC.GTT     | 1 | 179583516 | 179583532 | 5.66667 | .                  | .        | intergenic | 0      | rs195441 rs7863 | 2 |
| AG.CT       | 1 | 179612428 | 179612440 | 6.5     | .                  | .        | intergenic | .      | rs787466048     | 2 |
| AAAC.GTTT   | 1 | 179798167 | 179798185 | 4.75    | ENSSSCT0000005427  | ALPK2    | intron     | -0.051 | rs791566553     | 2 |
| AAAG.CTTT   | 1 | 180110591 | 180110619 | 7.25    | .                  | .        | intergenic | -0.183 | rs793239157     | 2 |
| AAAC.GTTT   | 1 | 180358208 | 180358234 | 6.75    | .                  | .        | intergenic | -0.008 | rs333479 rs7907 | 2 |
| AATG.CATT   | 1 | 180496477 | 180496494 | 4.5     | .                  | .        | intergenic | 0.082  | .               | 2 |
| AC.GT       | 1 | 180529638 | 180529663 | 13      | .                  | .        | intergenic | -0.008 | .               | 3 |
| AAAC.GTTT   | 1 | 180544811 | 180544836 | 6.5     | .                  | .        | intergenic | .      | rs791262304     | 2 |
| AAAC.GTTT   | 1 | 180590683 | 180590697 | 3.75    | .                  | .        | intergenic | .      | rs792732569     | 2 |
| AAC.GTT     | 1 | 180700035 | 180700054 | 6.66667 | ENSSSCT0000005437  | CLPX     | intron     | 1.762  | rs786495487     | 2 |
| AC.GT       | 1 | 180895939 | 180895952 | 7       | ENSSSCT0000005439  | PARP16   | promoter   | 0.089  | rs791393309     | 3 |
| AAT.ATT     | 1 | 180917186 | 180917211 | 8.66667 | .                  | .        | intergenic | -0.064 | rs791685764     | 2 |
| AAAAG.CTTTT | 1 | 180947395 | 180947417 | 4.6     | ENSSSCT0000005442  | IGDCC3   | intron     | -0.198 | rs727224 rs7938 | 2 |
| AAAT.ATTT   | 1 | 180968770 | 180968787 | 4.5     | .                  | .        | intergenic | .      | rs789478509     | 2 |
| AG.CT       | 1 | 180997071 | 180997086 | 8       | ENSSSCT0000005441  | IGDCC4   | intron     | 0.06   | rs690634157     | 2 |
| AG.CT       | 1 | 180997071 | 180997086 | 8       | ENSSSCT00000025179 | IGDCC4   | intron     | 0.06   | rs690634157     | 2 |
| AG.CT       | 1 | 181104316 | 181104325 | 5       | ENSSSCT00000025793 | PTPLAD1  | intron     | 0.361  | rs793449393     | 2 |
| AG.CT       | 1 | 181104316 | 181104325 | 5       | ENSSSCT0000005446  | PTPLAD1  | intron     | 0.361  | rs793449393     | 2 |
| AAC.GTT     | 1 | 181190076 | 181190098 | 7.66667 | .                  | .        | intergenic | .      | rs176732 rs7913 | 3 |
| AAC.GTT     | 1 | 182000106 | 182000127 | 7.33333 | .                  | .        | intergenic | .      | rs788331612     | 2 |
| AAAT.ATTT   | 1 | 183341070 | 183341088 | 4.75    | ENSSSCT00000024115 | MAP2K5   | intron     | 1.841  | rs793132451     | 2 |
| AAAT.ATTT   | 1 | 183341070 | 183341088 | 4.75    | ENSSSCT00000036194 | MAP2K5   | intron     | 1.841  | rs793132451     | 2 |
| AAAT.ATTT   | 1 | 183350924 | 183350945 | 5.5     | ENSSSCT00000024115 | MAP2K5   | intron     | .      | rs791304572     | 2 |
| AAAT.ATTT   | 1 | 183350924 | 183350945 | 5.5     | ENSSSCT00000036194 | MAP2K5   | intron     | .      | rs791304572     | 2 |
| AAAAC.GTTTT | 1 | 183385859 | 183385884 | 4.33333 | ENSSSCT00000024115 | MAP2K5   | intron     | 0.146  | rs790131245     | 2 |



|             |   |           |           |         |                    |         |            |        |                    |   |
|-------------|---|-----------|-----------|---------|--------------------|---------|------------|--------|--------------------|---|
| AAAAC.GTTTT | 1 | 183385859 | 183385884 | 4.33333 | ENSSSCT00000036194 | MAP2K5  | intron     | 0.146  | rs790131245        | 2 |
| AAC.GTT     | 1 | 183408755 | 183408771 | 5.66667 | ENSSSCT00000024115 | MAP2K5  | intron     | 0.149  | rs788845914        | 2 |
| AAC.GTT     | 1 | 183408755 | 183408771 | 5.66667 | ENSSSCT00000036194 | MAP2K5  | intron     | 0.149  | rs788845914        | 2 |
| AAAC.GTTT   | 1 | 183413325 | 183413338 | 3.5     | ENSSSCT00000036194 | MAP2K5  | intron     | 0.296  | rs793250612        | 2 |
| AC.GT       | 1 | 183441453 | 183441467 | 7.5     | ENSSSCT00000036194 | MAP2K5  | intron     | 0.019  | rs791711193        | 2 |
| AC.GT       | 1 | 183441453 | 183441467 | 7.5     | ENSSSCT00000025567 | .       | intron     | 0.019  | rs791711193        | 2 |
| AG.CT       | 1 | 183536295 | 183536305 | 5.5     | ENSSSCT00000005468 | SKOR1   | intron     | -0.129 | .                  | 3 |
| AAAT.ATTT   | 1 | 183570728 | 183570749 | 5.5     | .                  | .       | intergenic | .      | .                  | 2 |
| AAAC.GTTT   | 1 | 183620423 | 183620443 | 5.25    | .                  | .       | intergenic | .      | rs699586630        | 2 |
| AC.GT       | 1 | 183668820 | 183668840 | 10.5    | .                  | .       | intergenic | 0.147  | rs789935561        | 2 |
| AAAAC.GTTTT | 1 | 183700977 | 183700995 | 3.8     | .                  | .       | intergenic | -0.013 | rs788031561        | 2 |
| AAAAT.ATTTT | 1 | 183800756 | 183800784 | 5.8     | ENSSSCT00000005470 | .       | intron     | .      | rs787486974        | 2 |
| AC.GT       | 1 | 183879619 | 183879637 | 9.5     | ENSSSCT00000005469 | CLN6    | 3'utr      | 0.962  | rs793746344        | 2 |
| AC.GT       | 1 | 183879619 | 183879637 | 9.5     | ENSSSCT00000005470 | .       | intron     | 0.962  | rs793746344        | 2 |
| AT.AT       | 1 | 184634317 | 184634330 | 7       | .                  | .       | intergenic | 0.211  | .                  | 3 |
| AAG.CTT     | 1 | 184660837 | 184660861 | 8.33333 | .                  | .       | intergenic | .      | rs789485578        | 2 |
| AAAT.ATTT   | 1 | 184865624 | 184865645 | 5.5     | ENSSSCT00000005478 | .       | intron     | -0.34  | rs792883147        | 2 |
| AAAC.GTTT   | 1 | 184922219 | 184922237 | 4.75    | .                  | .       | intergenic | 0.069  | rs793127888        | 2 |
| AAC.GTT     | 1 | 184991326 | 184991339 | 4.66667 | ENSSSCT00000022924 | GLCE    | intron     | 0.458  | rs791768499        | 2 |
| AAAAC.GTTTT | 1 | 185126532 | 185126555 | 4.8     | .                  | .       | intergenic | -0.204 | rs791784911        | 2 |
| ACAG.CTGT   | 1 | 186422281 | 186422299 | 4.75    | .                  | .       | intergenic | -0.201 | rs786567202        | 2 |
| AC.GT       | 1 | 186455618 | 186455636 | 9.5     | .                  | .       | intergenic | -0.077 | .                  | 3 |
| AT.AT       | 1 | 186623585 | 186623596 | 6       | .                  | .       | intergenic | -0.13  | .                  | 4 |
| AAAT.ATTT   | 1 | 186714496 | 186714516 | 5.25    | .                  | .       | intergenic | 0.099  | rs793443737        | 2 |
| AG.CT       | 1 | 187470242 | 187470258 | 8.5     | .                  | .       | intergenic | 0.002  | rs789499584        | 2 |
| AAAAC.GTTTT | 1 | 187496419 | 187496435 | 3.4     | ENSSSCT00000023869 | .       | intron     | 0.268  | rs792005652        | 2 |
| AAAC.GTTT   | 1 | 187706319 | 187706341 | 5.75    | .                  | .       | intergenic | 0.159  | rs793027883        | 2 |
| AAAAC.GTTTT | 1 | 187855960 | 187855987 | 5.6     | ENSSSCT00000005492 | THSD4   | intron     | 0.081  | rs790257501        | 3 |
| AAAAC.GTTTT | 1 | 187855960 | 187855987 | 5.6     | ENSSSCT00000005493 | THSD4   | intron     | 0.081  | rs790257501        | 3 |
| AT.AT       | 1 | 187885190 | 187885199 | 5       | ENSSSCT00000005492 | THSD4   | intron     | .      | .                  | 2 |
| AT.AT       | 1 | 187885190 | 187885199 | 5       | ENSSSCT00000005493 | THSD4   | intron     | .      | .                  | 2 |
| AT.AT       | 1 | 187947406 | 187947437 | 16      | ENSSSCT00000005492 | THSD4   | intron     | 0.167  | rs788500093        | 2 |
| AT.AT       | 1 | 187947406 | 187947437 | 16      | ENSSSCT00000005493 | THSD4   | intron     | 0.167  | rs788500093        | 2 |
| AT.AT       | 1 | 187947406 | 187947437 | 16      | ENSSSCT00000026271 | .       | intron     | 0.167  | rs788500093        | 2 |
| AAAC.GTTT   | 1 | 187977182 | 187977206 | 6.25    | ENSSSCT00000026271 | .       | 3'utr      | 1.155  | rs789958075        | 2 |
| AAAC.GTTT   | 1 | 187977182 | 187977206 | 6.25    | ENSSSCT00000005492 | THSD4   | intron     | 1.155  | rs789958075        | 2 |
| AAAC.GTTT   | 1 | 187977182 | 187977206 | 6.25    | ENSSSCT00000005493 | THSD4   | intron     | 1.155  | rs789958075        | 2 |
| AAAAC.GTTTT | 1 | 188350937 | 188350959 | 4.6     | ENSSSCT00000005496 | .       | intron     | -0.054 | rs793123 rs7882    | 2 |
| AAAT.ATTT   | 1 | 188392734 | 188392759 | 6.5     | .                  | .       | intergenic | .      | rs792353224        | 2 |
| AT.AT       | 1 | 189035388 | 189035399 | 6       | .                  | .       | intergenic | 0.113  | rs792426573        | 2 |
| AC.GT       | 1 | 189379993 | 189380013 | 10.5    | .                  | .       | intergenic | 0.14   | rs7936330 rs7863   | 3 |
| AAC.GTT     | 1 | 189441866 | 189441879 | 4.66667 | .                  | .       | intergenic | .      | rs788988144        | 3 |
| AAC.GTT     | 1 | 189506550 | 189506563 | 4.66667 | .                  | .       | intergenic | .      | rs7933736 rs7917   | 2 |
| AAT.ATT     | 1 | 189560761 | 189560776 | 5.33333 | .                  | .       | intergenic | 0.08   | .                  | 2 |
| AC.GT       | 1 | 189655007 | 189655027 | 10.5    | .                  | .       | intergenic | .      | .                  | 3 |
| AT.AT       | 1 | 190254244 | 190254253 | 5       | .                  | .       | intergenic | -0.001 | rs707784002        | 3 |
| AGGG.CCCT   | 1 | 191191723 | 191191739 | 4.25    | .                  | .       | intergenic | -0.193 | .                  | 2 |
| AAC.GTT     | 1 | 191413840 | 191413853 | 4.66667 | .                  | .       | intergenic | 0.061  | rs79354526 rs7873  | 2 |
| AC.GT       | 1 | 191582012 | 191582037 | 13      | .                  | .       | intergenic | -0.042 | rs792561874        | 2 |
| AAAC.GTTT   | 1 | 191740920 | 191740942 | 5.75    | .                  | .       | intergenic | 0.033  | rs793338035        | 2 |
| AC.GT       | 1 | 191891408 | 191891421 | 7       | .                  | .       | intergenic | 0.233  | rs7907097 rs7918   | 2 |
| AAAC.GTTT   | 1 | 191893060 | 191893078 | 4.75    | .                  | .       | intergenic | .      | rs789762398        | 2 |
| AAAC.GTTT   | 1 | 191905397 | 191905416 | 5       | .                  | .       | intergenic | .      | rs790644929        | 2 |
| AT.AT       | 1 | 192161413 | 192161423 | 5.5     | .                  | .       | intergenic | -0.037 | .                  | 4 |
| AT.AT       | 1 | 192218334 | 192218354 | 10.5    | .                  | .       | intergenic | .      | rs789457805        | 2 |
| AC.GT       | 1 | 192242646 | 192242657 | 6       | .                  | .       | intergenic | .      | .                  | 2 |
| AT.AT       | 1 | 192454012 | 192454021 | 5       | .                  | .       | intergenic | -0.285 | .                  | 3 |
| AC.GT       | 1 | 192669665 | 192669678 | 7       | .                  | .       | intergenic | .      | rs79381653 rs7928  | 4 |
| AC.GT       | 1 | 192677290 | 192677301 | 6       | .                  | .       | intergenic | .      | rs79313315 rs7918  | 2 |
| AAAG.CTTT   | 1 | 192705621 | 192705633 | 3.25    | .                  | .       | intergenic | .      | rs789996090        | 2 |
| AGAT.ATCT   | 1 | 192721736 | 192721753 | 4.5     | .                  | .       | intergenic | .      | .                  | 4 |
| AT.AT       | 1 | 192906274 | 192906285 | 6       | .                  | .       | intergenic | 0.128  | rs792005388        | 2 |
| AAAC.GTTT   | 1 | 192915158 | 192915178 | 5.25    | .                  | .       | intergenic | .      | rs788792217        | 2 |
| AAAG.CTTT   | 1 | 192947872 | 192947886 | 3.75    | .                  | .       | intergenic | .      | rs793717397        | 3 |
| AT.AT       | 1 | 192952095 | 192952109 | 7.5     | .                  | .       | intergenic | .      | rs7924459 rs7923   | 2 |
| AAAC.GTTT   | 1 | 193508312 | 193508339 | 7       | .                  | .       | intergenic | -0.254 | rs792092763        | 2 |
| AAAAC.GTTTT | 1 | 193532521 | 193532535 | 3       | .                  | .       | intergenic | .      | rs789763699        | 2 |
| AT.AT       | 1 | 193583870 | 193583880 | 5.5     | .                  | .       | intergenic | .      | rs787019036        | 2 |
| AT.AT       | 1 | 194192567 | 194192576 | 5       | .                  | .       | intergenic | .      | .                  | 3 |
| AG.CT       | 1 | 194488613 | 194488627 | 7.5     | .                  | .       | intergenic | .      | rs787784979        | 2 |
| AT.AT       | 1 | 194719892 | 194719903 | 6       | .                  | .       | intergenic | .      | rs786319888        | 2 |
| AC.GT       | 1 | 194968899 | 194968929 | 15.5    | ENSSSCT00000005510 | KLHL28  | intron     | 0.201  | rs793105783 rs7883 | 3 |
| AAC.GTT     | 1 | 195138697 | 195138716 | 6.66667 | ENSSSCT00000025268 | FAM179B | intron     | .      | rs786512632        | 2 |
| AT.AT       | 1 | 195540292 | 195540311 | 10      | .                  | .       | intergenic | 0.253  | rs791625421        | 2 |
| AT.AT       | 1 | 195640969 | 195640980 | 6       | .                  | .       | intergenic | 0.279  | rs788880404        | 3 |
| AC.GT       | 1 | 195700583 | 195700592 | 5       | .                  | .       | intergenic | 0.45   | .                  | 3 |
| AT.AT       | 1 | 195816954 | 195816963 | 5       | .                  | .       | intergenic | 0.337  | rs791610709        | 2 |
| AAAC.GTTT   | 1 | 196021226 | 196021243 | 4.5     | .                  | .       | intergenic | 0.241  | rs788683265        | 2 |
| AAAC.GTTT   | 1 | 196038262 | 196038276 | 3.75    | .                  | .       | intergenic | .      | rs789677907        | 3 |
| AAC.GTT     | 1 | 196677276 | 196677292 | 5.66667 | .                  | .       | intergenic | 0.003  | rs792974690        | 3 |
| AT.AT       | 1 | 196996720 | 196996736 | 8.5     | ENSSSCT00000005517 | .       | intron     | 0.057  | .                  | 4 |
| AATG.CATT   | 1 | 197863377 | 197863402 | 6.5     | .                  | .       | intergenic | .      | rs79354171 rs7921  | 2 |
| AC.GT       | 1 | 197931492 | 197931503 | 6       | .                  | .       | intergenic | -0.053 | rs790533878        | 3 |
| AC.GT       | 1 | 197944929 | 197944941 | 6.5     | .                  | .       | intergenic | -0.064 | rs791920090        | 2 |

|             |   |           |           |         |                    |           |            |        |               |   |
|-------------|---|-----------|-----------|---------|--------------------|-----------|------------|--------|---------------|---|
| AAAC.GTTT   | 1 | 197954676 | 197954695 | 5       | .                  | .         | intergenic | .      | 18262 rs7931  | 2 |
| AAAC.GTTT   | 1 | 198008393 | 198008423 | 7.75    | .                  | .         | intergenic | .      | rs791781768   | 2 |
| AT.AT       | 1 | 198254633 | 198254644 | 6       | .                  | .         | intergenic | -0.018 | 361785 rs7889 | 2 |
| AAAC.GTTT   | 1 | 198805835 | 198805869 | 8.75    | .                  | .         | intergenic | .      | 392011 rs7911 | 2 |
| AAT.ATT     | 1 | 199762214 | 199762225 | 4       | .                  | .         | intergenic | .      | .             | 4 |
| AAAC.GTTT   | 1 | 199875331 | 199875346 | 4       | ENSSSCT00000005523 | DNAAF2    | intron     | 0.534  | rs789743133   | 2 |
| AAC.GTT     | 1 | 200330787 | 200330809 | 7.66667 | ENSSSCT00000005531 | SOS2      | intron     | .      | 323261 rs7909 | 2 |
| AC.GT       | 1 | 200602609 | 200602619 | 5.5     | ENSSSCT00000005536 | .         | intron     | 0.187  | .             | 3 |
| AAC.GTT     | 1 | 200939159 | 200939178 | 6.66667 | ENSSSCT00000005539 | ABHD12B   | intron     | 0.191  | rs789750270   | 2 |
| AAC.GTT     | 1 | 200939159 | 200939178 | 6.66667 | ENSSSCT00000023698 | ABHD12B   | intron     | 0.191  | rs789750270   | 2 |
| AAAC.GTTT   | 1 | 201078448 | 201078470 | 5.75    | ENSSSCT00000005541 | TRIM9     | intron     | 0.219  | rs788550861   | 2 |
| AAAC.GTTT   | 1 | 201078448 | 201078470 | 5.75    | ENSSSCT00000022907 | TRIM9     | intron     | 0.219  | rs788550861   | 2 |
| AAT.ATT     | 1 | 201225055 | 201225068 | 4.66667 | ENSSSCT00000028405 | TMX1      | intron     | 0.121  | rs790530994   | 2 |
| AC.GT       | 1 | 201247526 | 201247538 | 6.5     | .                  | .         | intergenic | .      | .             | 3 |
| AG.CT       | 1 | 201352926 | 201352936 | 5.5     | .                  | .         | intergenic | 0.023  | .             | 3 |
| AGC.GCT     | 1 | 201470442 | 201470453 | 4       | .                  | .         | intergenic | 0.088  | .             | 2 |
| AC.GT       | 1 | 201606825 | 201606848 | 12      | .                  | .         | intergenic | 0.153  | rs793833170   | 2 |
| AAAAT.ATTTT | 1 | 201811107 | 201811130 | 4.8     | .                  | .         | intergenic | .      | rs791088850   | 2 |
| AG.CT       | 1 | 202057531 | 202057543 | 6.5     | .                  | .         | intergenic | 1.153  | .             | 5 |
| AC.GT       | 1 | 202215971 | 202215987 | 8.5     | .                  | .         | intergenic | 0.169  | rs788024309   | 3 |
| AAC.GTT     | 1 | 202318531 | 202318551 | 7       | .                  | .         | intergenic | 0.08   | 352276 rs7895 | 2 |
| AT.AT       | 1 | 202462682 | 202462692 | 5.5     | ENSSSCT00000027583 | .         | intron     | .      | rs791431380   | 2 |
| AT.AT       | 1 | 202462682 | 202462692 | 5.5     | ENSSSCT00000005553 | ERO1L     | intron     | .      | rs791431380   | 2 |
| AAAT.ATTT   | 1 | 202481560 | 202481583 | 6       | ENSSSCT00000027583 | .         | intron     | 0.339  | rs789361988   | 2 |
| AAAT.ATTT   | 1 | 202481560 | 202481583 | 6       | ENSSSCT00000005553 | ERO1L     | intron     | 0.339  | rs789361988   | 2 |
| AAC.GTT     | 1 | 202726988 | 202727001 | 4.66667 | .                  | .         | intergenic | 0.122  | rs791353349   | 2 |
| AAG.CTT     | 1 | 202875596 | 202875621 | 8.66667 | .                  | .         | intergenic | -0.3   | rs789440178   | 4 |
| AAAAC.GTTTT | 1 | 202883727 | 202883749 | 4.6     | .                  | .         | intergenic | 0.419  | rs789929565   | 2 |
| AC.GT       | 1 | 202891414 | 202891436 | 11.5    | .                  | .         | intergenic | 0.111  | 101869 rs7917 | 4 |
| AG.CT       | 1 | 203043706 | 203043722 | 8.5     | .                  | .         | intergenic | 0.116  | 142342 rs7879 | 3 |
| AG.CT       | 1 | 203100535 | 203100550 | 8       | .                  | .         | intergenic | .      | rs691587047   | 2 |
| AC.GT       | 1 | 203706580 | 203706595 | 8       | .                  | .         | intergenic | 0.305  | 375065 rs7874 | 2 |
| AT.AT       | 1 | 204166497 | 204166514 | 9       | .                  | .         | intergenic | 0.159  | 309110 rs7931 | 2 |
| AG.CT       | 1 | 204447640 | 204447649 | 5       | ENSSSCT00000024259 | SAMD4A    | intron     | 0.161  | rs790935450   | 2 |
| ATC.GAT     | 1 | 204511141 | 204511156 | 5.33333 | ENSSSCT00000024259 | SAMD4A    | intron     | 0.076  | rs787804043   | 2 |
| AAAC.GTTT   | 1 | 204616524 | 204616539 | 4       | ENSSSCT00000024259 | SAMD4A    | intron     | -0.1   | 326414 rs7922 | 2 |
| AAAAC.GTTTT | 1 | 204771869 | 204771889 | 4.2     | .                  | .         | intergenic | 0.912  | 306037 rs7937 | 2 |
| AT.AT       | 1 | 204903892 | 204903901 | 5       | .                  | .         | intergenic | 0.713  | .             | 2 |
| AT.AT       | 1 | 204907741 | 204907754 | 7       | ENSSSCT00000005571 | MAPK11P1L | promoter   | .      | 149046 rs7876 | 2 |
| AAAC.GTTT   | 1 | 204978256 | 204978278 | 5.75    | .                  | .         | intergenic | 0.409  | rs787778147   | 2 |
| AAC.GTT     | 1 | 205407371 | 205407390 | 6.66667 | .                  | .         | intergenic | 0.101  | rs788870542   | 2 |
| AAC.GTT     | 1 | 205414840 | 205414855 | 5.33333 | .                  | .         | intergenic | 0.108  | 352414 rs7898 | 2 |
| AAAC.GTTT   | 1 | 205491318 | 205491334 | 4.25    | ENSSSCT00000005577 | KTN1      | intron     | 1.083  | rs786498266   | 2 |
| AGC.GCT     | 1 | 205517979 | 205518000 | 7.33333 | ENSSSCT00000005577 | KTN1      | intron     | 0.472  | 315934 rs7937 | 2 |
| AG.CT       | 1 | 205645061 | 205645070 | 5       | .                  | .         | intergenic | .      | rs789073244   | 2 |
| AAAAC.GTTTT | 1 | 205713396 | 205713410 | 3       | .                  | .         | intergenic | .      | rs792757370   | 2 |
| AAAC.GTTT   | 1 | 205764701 | 205764717 | 4.25    | .                  | .         | intergenic | 0.317  | 187259 rs7921 | 3 |
| AAAAC.GTTTT | 1 | 205929633 | 205929653 | 4.2     | .                  | .         | intergenic | 0.203  | rs786536401   | 2 |
| AAAAC.GTTTT | 1 | 205930807 | 205930828 | 4.4     | .                  | .         | intergenic | -0.021 | rs787544441   | 2 |
| AC.GT       | 1 | 206135419 | 206135434 | 8       | ENSSSCT00000029724 | PELI2     | intron     | -0.064 | .             | 4 |
| AAC.GTT     | 1 | 206244502 | 206244513 | 4       | .                  | .         | intergenic | .      | rs792205585   | 2 |
| AG.CT       | 1 | 206368580 | 206368593 | 7       | .                  | .         | intergenic | .      | rs788263694   | 2 |
| AAGG.CCTT   | 1 | 206459729 | 206459753 | 6.25    | ENSSSCT00000005579 | TMEM260   | intron     | 0.305  | 117692 rs7895 | 2 |
| AAG.CTT     | 1 | 206519216 | 206519230 | 5       | .                  | .         | intergenic | 0.078  | rs790785391   | 2 |
| AAAT.ATTT   | 1 | 206544031 | 206544053 | 5.75    | .                  | .         | intergenic | 0.17   | 703454 rs7894 | 2 |
| AAC.GTT     | 1 | 206593487 | 206593504 | 6       | .                  | .         | intergenic | 0.047  | .             | 2 |
| AAG.CTT     | 1 | 206655708 | 206655721 | 4.66667 | .                  | .         | intergenic | 1.128  | 361931 rs7879 | 2 |
| AT.AT       | 1 | 206771264 | 206771276 | 6.5     | .                  | .         | intergenic | 0.121  | rs790093025   | 3 |
| AT.AT       | 1 | 206862083 | 206862093 | 5.5     | .                  | .         | intergenic | .      | rs789719415   | 2 |
| AATG.CATT   | 1 | 207149186 | 207149218 | 8.25    | .                  | .         | intergenic | -0.038 | 704162 rs7906 | 2 |
| AAT.ATT     | 1 | 207218733 | 207218748 | 5.33333 | .                  | .         | intergenic | 0.084  | rs792124243   | 2 |
| AAG.CTT     | 1 | 208077876 | 208077890 | 5       | .                  | .         | intergenic | .      | rs792132198   | 2 |
| AAAT.ATTT   | 1 | 208180167 | 208180190 | 6       | .                  | .         | intergenic | 0.11   | rs694024205   | 2 |
| AT.AT       | 1 | 208632597 | 208632610 | 7       | .                  | .         | intergenic | 0.512  | rs788199673   | 2 |
| AAT.ATT     | 1 | 208710310 | 208710321 | 4       | .                  | .         | intergenic | 0.132  | rs787409374   | 2 |
| AAAG.CTTT   | 1 | 208719834 | 208719848 | 3.75    | .                  | .         | intergenic | .      | 155505 rs7874 | 2 |
| AAC.GTT     | 1 | 208749320 | 208749333 | 4.66667 | .                  | .         | intergenic | 0.068  | 308579 rs7914 | 2 |
| AAAC.GTTT   | 1 | 208778179 | 208778201 | 5.75    | .                  | .         | intergenic | 0.123  | 115876 rs7872 | 2 |
| AAAT.ATTT   | 1 | 209535158 | 209535192 | 8.75    | .                  | .         | intergenic | -0.024 | rs790848758   | 2 |
| AG.CT       | 1 | 209926313 | 209926325 | 6.5     | ENSSSCT00000022854 | RTN1      | intron     | .      | 113079 rs7865 | 2 |
| AC.GT       | 1 | 210116887 | 210116899 | 6.5     | ENSSSCT00000005600 | LRRC9     | intron     | 0.16   | rs791548185   | 2 |
| AG.CT       | 1 | 210124832 | 210124841 | 5       | ENSSSCT00000005600 | LRRC9     | intron     | 0.241  | .             | 2 |
| AAAC.GTTT   | 1 | 210237958 | 210237977 | 5       | .                  | .         | intergenic | 0.165  | rs787661908   | 2 |
| AATT.AATT   | 1 | 210484658 | 210484674 | 4.25    | .                  | .         | intergenic | 0.193  | rs793356513   | 2 |
| AAG.CTT     | 1 | 210550666 | 210550684 | 6.33333 | .                  | .         | intergenic | .      | rs787730643   | 2 |
| AAAT.ATTT   | 1 | 210592544 | 210592577 | 8.5     | .                  | .         | intergenic | .      | .             | 2 |
| AG.CT       | 1 | 210708214 | 210708226 | 6.5     | .                  | .         | intergenic | 0.161  | .             | 3 |
| AAT.ATT     | 1 | 211165013 | 211165026 | 4.66667 | .                  | .         | intergenic | .      | rs790808553   | 2 |
| AG.CT       | 1 | 211365904 | 211365933 | 15      | .                  | .         | intergenic | 0.1    | rs792968484   | 2 |
| AG.CT       | 1 | 211499520 | 211499530 | 5.5     | .                  | .         | intergenic | -0.233 | .             | 2 |
| AT.AT       | 1 | 211782165 | 211782176 | 6       | ENSSSCT00000005616 | PKC       | intron     | 0.268  | rs713454280   | 2 |
| AC.GT       | 1 | 212767376 | 212767394 | 9.5     | .                  | .         | intergenic | 0.033  | rs791448163   | 2 |
| AAAAC.GTTTT | 1 | 212782017 | 212782037 | 3.5     | .                  | .         | intergenic | .      | 314404 rs7937 | 2 |
| ACCT.AGGT   | 1 | 213029287 | 213029308 | 5.5     | ENSSSCT00000005628 | NTRK3     | intron     | 0.035  | rs792426465   | 2 |

|               |   |           |           |         |                    |         |            |        |               |   |
|---------------|---|-----------|-----------|---------|--------------------|---------|------------|--------|---------------|---|
| ATC.GAT       | 1 | 213044664 | 213044680 | 5.66667 | ENSSSCT00000005628 | NTRK3   | intron     | 0.018  | rs790639664   | 2 |
| AG.CT         | 1 | 213076717 | 213076729 | 6.5     | ENSSSCT00000005628 | NTRK3   | intron     | 0.233  | .             | 4 |
| ATC.GAT       | 1 | 213120147 | 213120159 | 4.33333 | ENSSSCT00000005628 | NTRK3   | intron     | 0.084  | .             | 4 |
| AAC.GTT       | 1 | 213742957 | 213742972 | 5.33333 | .                  | .       | intergenic | .      | .             | 2 |
| AAC.GTT       | 1 | 213743642 | 213743658 | 5.66667 | .                  | .       | intergenic | .      | .             | 2 |
| AAC.GTT       | 1 | 214050188 | 214050200 | 4.33333 | .                  | .       | intergenic | -0.103 | 333184 rs7876 | 2 |
| AAAT.ATTT     | 1 | 214201215 | 214201239 | 6.25    | .                  | .       | intergenic | 0.125  | 281426 rs7888 | 2 |
| AT.AT         | 1 | 214275929 | 214275938 | 5       | .                  | .       | intergenic | -0.168 | .             | 2 |
| AC.GT         | 1 | 214297370 | 214297382 | 6.5     | .                  | .       | intergenic | -0.06  | rs793853763   | 2 |
| AAAC.GTTT     | 1 | 214360158 | 214360193 | 9       | .                  | .       | intergenic | -0.055 | rs788724601   | 2 |
| AAT.ATT       | 1 | 214422808 | 214422819 | 4       | .                  | .       | intergenic | -0.109 | rs791192165   | 2 |
| \GATAT.ATATC  | 1 | 214636492 | 214636520 | 4.83333 | .                  | .       | intergenic | -0.042 | rs791979364   | 2 |
| AC.GT         | 1 | 214800703 | 214800715 | 6.5     | .                  | .       | intergenic | -0.006 | rs790386629   | 2 |
| AT.AT         | 1 | 214895023 | 214895037 | 7.5     | .                  | .       | intergenic | 0.096  | rs793784045   | 2 |
| AG.CT         | 1 | 214941374 | 214941384 | 5.5     | .                  | .       | intergenic | 0.29   | .             | 2 |
| AC.GT         | 1 | 215049402 | 215049416 | 7.5     | .                  | .       | intergenic | 0.163  | rs787940574   | 2 |
| AAGG.CCTT     | 1 | 215322847 | 215322874 | 7       | .                  | .       | intergenic | -0.029 | 374749 rs7913 | 2 |
| AATC.GATT     | 1 | 215413963 | 215413995 | 8.25    | .                  | .       | intergenic | 0.58   | rs787057807   | 2 |
| AAAC.GTTT     | 1 | 215501516 | 215501531 | 4       | .                  | .       | intergenic | -0.168 | rs787393159   | 2 |
| AC.GT         | 1 | 215749522 | 215749535 | 7       | ENSSSCT00000005632 | ER2     | intron     | 0.085  | rs792130290   | 4 |
| AAAAC.GTTTT   | 1 | 216098066 | 216098082 | 3.4     | .                  | .       | intergenic | -0.604 | rs787045859   | 2 |
| AAAC.GTTT     | 1 | 216108849 | 216108861 | 3.25    | .                  | .       | intergenic | 0.15   | rs792767040   | 2 |
| AAAC.GTTT     | 1 | 216130083 | 216130109 | 6.75    | .                  | .       | intergenic | 0.344  | 385682 rs7865 | 2 |
| AGG.CCT       | 1 | 216952038 | 216952049 | 4       | .                  | .       | intergenic | 0.014  | .             | 2 |
| AT.AT         | 1 | 217479920 | 217479930 | 5.5     | .                  | .       | intergenic | 0.379  | rs787755021   | 2 |
| AG.CT         | 1 | 217502675 | 217502685 | 5.5     | .                  | .       | intergenic | -0.062 | rs793082133   | 2 |
| AG.CT         | 1 | 217533612 | 217533624 | 6.5     | .                  | .       | intergenic | 0.559  | .             | 4 |
| AC.GT         | 1 | 218472319 | 218472331 | 6.5     | ENSSSCT00000035816 | TEK     | intron     | -0.058 | 316373 rs7888 | 3 |
| AC.GT         | 1 | 218472319 | 218472331 | 6.5     | ENSSSCT00000036581 | TEK     | intron     | -0.058 | 316373 rs7888 | 3 |
| AC.GT         | 1 | 218472319 | 218472331 | 6.5     | ENSSSCT00000005647 | TEK     | intron     | -0.058 | 316373 rs7888 | 3 |
| AC.GT         | 1 | 218472319 | 218472331 | 6.5     | ENSSSCT00000033502 | TEK     | intron     | -0.058 | 316373 rs7888 | 3 |
| AAAAT.ATTTT   | 1 | 218578907 | 218578939 | 6.6     | ENSSSCT00000005649 | IFT74   | intron     | 0.223  | rs787837741   | 2 |
| AAAAT.ATTTT   | 1 | 218578907 | 218578939 | 6.6     | ENSSSCT00000005650 | LRR19   | intron     | 0.223  | rs787837741   | 2 |
| AAAATT.AATTTT | 1 | 218980835 | 218980858 | 4       | .                  | .       | intergenic | .      | 362069 rs7880 | 2 |
| AAG.CTT       | 1 | 219029074 | 219029099 | 8.66667 | .                  | .       | intergenic | 0.09   | rs786951786   | 2 |
| AC.GT         | 1 | 219817655 | 219817666 | 6       | .                  | .       | intergenic | 0.097  | rs792790458   | 2 |
| AAAC.GTTT     | 1 | 219886165 | 219886187 | 5.75    | .                  | .       | intergenic | 0.194  | rs791638553   | 2 |
| AT.AT         | 1 | 219932429 | 219932449 | 10.5    | .                  | .       | intergenic | 0.067  | rs792687691   | 2 |
| AC.GT         | 1 | 220253323 | 220253333 | 5.5     | .                  | .       | intergenic | .      | .             | 2 |
| AT.AT         | 1 | 220293658 | 220293682 | 12.5    | .                  | .       | intergenic | .      | 371747 rs7902 | 2 |
| AT.AT         | 1 | 220385436 | 220385459 | 12      | .                  | .       | intergenic | -0.056 | 164616 rs7886 | 2 |
| AAAC.GTTT     | 1 | 220746731 | 220746750 | 5       | .                  | .       | intergenic | .      | rs788047428   | 2 |
| AAAC.GTTT     | 1 | 220970674 | 220970692 | 4.75    | .                  | .       | intergenic | -0.047 | rs790268891   | 2 |
| AG.CT         | 1 | 221033521 | 221033537 | 8.5     | .                  | .       | intergenic | .      | 293362 rs7884 | 2 |
| AAC.GTT       | 1 | 221245641 | 221245652 | 4       | .                  | .       | intergenic | 0.049  | rs792424746   | 4 |
| ACAT.ATGT     | 1 | 221489944 | 221489966 | 5.75    | .                  | .       | intergenic | .      | rs786743081   | 3 |
| AT.AT         | 1 | 221495167 | 221495179 | 6.5     | .                  | .       | intergenic | 0.16   | 369913 rs7865 | 3 |
| AAAT.ATTT     | 1 | 221516759 | 221516775 | 4.25    | .                  | .       | intergenic | 0.327  | rs787912607   | 2 |
| AG.CT         | 1 | 221646071 | 221646084 | 7       | .                  | .       | intergenic | .      | 187236 rs7923 | 2 |
| AT.AT         | 1 | 221923773 | 221923783 | 5.5     | .                  | .       | intergenic | 0.319  | rs790574856   | 2 |
| AAAT.ATTT     | 1 | 222260416 | 222260434 | 4.75    | .                  | .       | intergenic | 0.044  | rs790914660   | 2 |
| AC.GT         | 1 | 222477096 | 222477108 | 6.5     | .                  | .       | intergenic | -0.13  | .             | 2 |
| AC.GT         | 1 | 223010462 | 223010472 | 5.5     | .                  | .       | intergenic | 0.556  | .             | 2 |
| AT.AT         | 1 | 223694787 | 223694799 | 6.5     | .                  | .       | intergenic | .      | 763147 rs7887 | 2 |
| AG.CT         | 1 | 223695304 | 223695316 | 6.5     | .                  | .       | intergenic | .      | rs793684259   | 2 |
| AT.AT         | 1 | 223952510 | 223952519 | 5       | .                  | .       | intergenic | .      | .             | 2 |
| AATC.GATT     | 1 | 224087266 | 224087286 | 5.25    | ENSSSCT00000005663 | .       | intron     | .      | 163242 rs7882 | 2 |
| AAAC.GTTT     | 1 | 224138972 | 224139002 | 7.75    | .                  | .       | intergenic | 0.06   | .             | 2 |
| AG.CT         | 1 | 224227937 | 224227948 | 6       | .                  | .       | intergenic | 0.003  | .             | 4 |
| AG.CT         | 1 | 224371169 | 224371183 | 7.5     | .                  | .       | intergenic | 0.019  | 310519 rs7925 | 2 |
| AAT.ATT       | 1 | 224389797 | 224389811 | 5       | .                  | .       | intergenic | 0.287  | rs791752331   | 2 |
| AC.GT         | 1 | 225582074 | 225582083 | 5       | .                  | .       | intergenic | .      | .             | 4 |
| AAC.GTT       | 1 | 225677718 | 225677743 | 8.66667 | .                  | .       | intergenic | 0.361  | rs791536108   | 2 |
| AAATT.AATTT   | 1 | 225712461 | 225712475 | 3       | ENSSSCT00000028872 | .       | intron     | .      | 117541 rs7911 | 2 |
| AG.CT         | 1 | 225848812 | 225848826 | 7.5     | .                  | .       | intergenic | 0.26   | 187877 rs7934 | 3 |
| AAAC.GTTT     | 1 | 226229551 | 226229565 | 3.75    | ENSSSCT00000005694 | MLLT3   | intron     | 0.066  | rs790641846   | 3 |
| AC.GT         | 1 | 226666639 | 226666667 | 14.5    | ENSSSCT00000005695 | SLC24A2 | intron     | 0.307  | 152378 rs7916 | 2 |
| AC.GT         | 1 | 226712261 | 226712272 | 6       | ENSSSCT00000005695 | SLC24A2 | intron     | -0.038 | rs793039930   | 2 |
| AC.GT         | 1 | 227091879 | 227091889 | 5.5     | .                  | .       | intergenic | .      | .             | 3 |
| \AAAAC.GTTTT  | 1 | 227233477 | 227233499 | 3.83333 | ENSSSCT00000005700 | DENND4C | intron     | .      | rs792318383   | 2 |
| AC.GT         | 1 | 227425344 | 227425367 | 12      | .                  | .       | intergenic | .      | 372215 rs7937 | 2 |
| \AAAAG.CTTTT  | 1 | 227433448 | 227433473 | 4.33333 | .                  | .       | intergenic | 0.032  | rs787814633   | 2 |
| AAAC.GTTT     | 1 | 227581108 | 227581124 | 4.25    | .                  | .       | intergenic | 0.032  | rs793671225   | 2 |
| AG.CT         | 1 | 228027148 | 228027159 | 6       | .                  | .       | intergenic | .      | rs789047047   | 5 |
| AC.GT         | 1 | 228066062 | 228066076 | 7.5     | .                  | .       | intergenic | 0.065  | 333212 rs7031 | 4 |
| ACCC.GGGT     | 1 | 228162439 | 228162455 | 4.25    | .                  | .       | intergenic | -0.162 | .             | 2 |
| AAAAC.GTTTT   | 1 | 228337478 | 228337507 | 6       | .                  | .       | intergenic | 0.65   | 325188 rs7926 | 2 |
| AATG.CATT     | 1 | 229009264 | 229009300 | 9.25    | .                  | .       | intergenic | -0.016 | 345278 rs7895 | 2 |
| AAAT.ATTT     | 1 | 229045143 | 229045162 | 5       | .                  | .       | intergenic | -0.114 | rs787579796   | 2 |
| AC.GT         | 1 | 229849194 | 229849224 | 15.5    | ENSSSCT00000031467 | .       | intron     | 4.063  | rs788979451   | 2 |
| AAAC.GTTT     | 1 | 230414008 | 230414026 | 4.75    | .                  | .       | intergenic | 0.001  | rs793752163   | 2 |
| AAAC.GTTT     | 1 | 230431837 | 230431857 | 5.25    | .                  | .       | intergenic | 0.005  | rs788327913   | 2 |
| AG.CT         | 1 | 230476385 | 230476395 | 5.5     | .                  | .       | intergenic | 0.505  | .             | 2 |
| AT.AT         | 1 | 230583643 | 230583653 | 5.5     | ENSSSCT00000005713 | .       | intron     | 0.025  | .             | 2 |

|             |   |           |           |         |                    |          |            |        |               |   |
|-------------|---|-----------|-----------|---------|--------------------|----------|------------|--------|---------------|---|
| ACAC.GTGT   | 1 | 230649318 | 230649356 | 9.75    | ENSSSCT00000005713 | .        | intron     | .      | rs793171914   | 3 |
| AAAC.GTTT   | 1 | 230706869 | 230706899 | 7.75    | .                  | .        | intergenic | .      | rs787040612   | 2 |
| AAAT.ATTT   | 1 | 231360462 | 231360478 | 4.25    | .                  | .        | intergenic | 0.21   | 305140 rs7930 | 2 |
| AC.GT       | 1 | 231521164 | 231521176 | 6.5     | .                  | .        | intergenic | 0.104  | .             | 3 |
| AG.CT       | 1 | 231839662 | 231839673 | 6       | .                  | .        | intergenic | 0.075  | .             | 2 |
| AAAC.GTTT   | 1 | 231871825 | 231871844 | 5       | .                  | .        | intergenic | .      | rs793528775   | 2 |
| AAC.GTT     | 1 | 231879602 | 231879621 | 6.66667 | .                  | .        | intergenic | 0.015  | rs786596121   | 2 |
| AAAT.ATTT   | 1 | 232449039 | 232449061 | 5.75    | .                  | .        | intergenic | 0.238  | rs791927119   | 2 |
| AAAAT.GTTTT | 1 | 232526550 | 232526576 | 5.4     | .                  | .        | intergenic | -0.183 | 352848 rs7911 | 2 |
| AC.GT       | 1 | 232551618 | 232551627 | 5       | .                  | .        | intergenic | -0.326 | .             | 2 |
| AAAAT.ATTTT | 1 | 232625268 | 232625287 | 4       | .                  | .        | intergenic | 0.206  | rs789525219   | 2 |
| AAAC.GTTT   | 1 | 232787936 | 232787957 | 5.5     | .                  | .        | intergenic | 0.443  | rs791601012   | 2 |
| AG.CT       | 1 | 232912746 | 232912773 | 14      | .                  | .        | intergenic | -0.211 | .             | 4 |
| AAAC.GTTT   | 1 | 233156056 | 233156078 | 5.75    | ENSSSCT00000005723 | MPDZ     | intron     | -0.109 | 373183 rs7925 | 2 |
| AAAAT.ATTTT | 1 | 233306639 | 233306654 | 3.2     | .                  | .        | intergenic | -0.219 | rs792299827   | 2 |
| AC.GT       | 1 | 233961246 | 233961281 | 18      | .                  | .        | intergenic | 0.446  | rs787775959   | 2 |
| AT.AT       | 1 | 234056948 | 234056960 | 6.5     | .                  | .        | intergenic | .      | rs792552518   | 2 |
| AT.AT       | 1 | 234090450 | 234090471 | 11      | .                  | .        | intergenic | 0.443  | .             | 2 |
| ACAG.CTGT   | 1 | 234175813 | 234175824 | 3       | .                  | .        | intergenic | .      | rs789346276   | 2 |
| AAAC.GTTT   | 1 | 234470007 | 234470033 | 6.75    | .                  | .        | intergenic | 0.016  | 262712 rs7881 | 2 |
| AT.AT       | 1 | 234497374 | 234497386 | 6.5     | .                  | .        | intergenic | -0.068 | .             | 3 |
| AT.AT       | 1 | 235084062 | 235084081 | 10      | .                  | .        | intergenic | .      | 163564 rs7925 | 2 |
| AC.GT       | 1 | 235113287 | 235113299 | 6.5     | .                  | .        | intergenic | .      | .             | 3 |
| AT.AT       | 1 | 235792274 | 235792305 | 16      | .                  | .        | intergenic | .      | rs791961786   | 2 |
| AAAAG.CTTTT | 1 | 235891542 | 235891567 | 5.2     | .                  | .        | intergenic | .      | .             | 2 |
| AG.CT       | 1 | 236044165 | 236044182 | 9       | .                  | .        | intergenic | 0.025  | rs792186575   | 2 |
| AAAC.GTTT   | 1 | 237038149 | 237038167 | 4.75    | .                  | .        | intergenic | -0.052 | rs791027208   | 2 |
| AG.CT       | 1 | 237144009 | 237144023 | 7.5     | .                  | .        | intergenic | 0.019  | rs787498964   | 2 |
| AT.AT       | 1 | 237250677 | 237250688 | 6       | .                  | .        | intergenic | .      | rs788071634   | 2 |
| AAAC.GTTT   | 1 | 237863323 | 237863340 | 4.5     | .                  | .        | intergenic | 0.836  | rs792541702   | 2 |
| AAAAC.GTTTT | 1 | 238252553 | 238252575 | 4.6     | .                  | .        | intergenic | .      | .             | 2 |
| AC.GT       | 1 | 238351466 | 238351478 | 6.5     | .                  | .        | intergenic | 0.031  | .             | 2 |
| AT.AT       | 1 | 239200162 | 239200186 | 12.5    | .                  | .        | intergenic | -0.211 | 394070 rs7889 | 2 |
| AT.AT       | 1 | 239774830 | 239774859 | 15      | .                  | .        | intergenic | .      | .             | 2 |
| AC.GT       | 1 | 239986002 | 239986022 | 10.5    | .                  | .        | intergenic | 0.113  | .             | 2 |
| AAG.CTT     | 1 | 240474816 | 240474833 | 6       | .                  | .        | intergenic | 0.071  | 141105 rs7928 | 2 |
| AAAC.GTTT   | 1 | 240601522 | 240601547 | 6.5     | .                  | .        | intergenic | .      | rs792429494   | 2 |
| AC.GT       | 1 | 240802447 | 240802458 | 6       | ENSSSCT00000005730 | .        | intron     | 0.253  | .             | 6 |
| AT.AT       | 1 | 240861131 | 240861142 | 6       | ENSSSCT00000005730 | .        | intron     | 2.917  | rs786938690   | 3 |
| AC.GT       | 1 | 240880337 | 240880351 | 7.5     | ENSSSCT00000005730 | .        | intron     | 0.378  | rs792139077   | 2 |
| AAAC.GTTT   | 1 | 241247951 | 241247973 | 5.75    | .                  | .        | intergenic | 0.13   | rs791760118   | 2 |
| AAAT.ATTT   | 1 | 241704933 | 241704954 | 5.5     | .                  | .        | intergenic | 0.044  | rs792519218   | 2 |
| AT.AT       | 1 | 241967279 | 241967299 | 10.5    | ENSSSCT00000005738 | MLANA    | intron     | .      | 26367 rs7888  | 2 |
| AC.GT       | 1 | 242411760 | 242411772 | 6.5     | ENSSSCT00000005744 | PDL1     | intron     | 0.11   | .             | 3 |
| AAAC.GTTT   | 1 | 242566826 | 242566848 | 5.75    | .                  | .        | intergenic | .      | 360500 rs7865 | 2 |
| AAC.GTT     | 1 | 242771010 | 242771023 | 4.66667 | ENSSSCT00000005748 | JAK2     | intron     | 0.061  | rs790680260   | 2 |
| ACT.AGT     | 1 | 242779629 | 242779644 | 5.33333 | ENSSSCT00000005748 | JAK2     | intron     | .      | .             | 2 |
| AT.AT       | 1 | 242846964 | 242846980 | 8.5     | .                  | .        | intergenic | 0.384  | .             | 2 |
| AT.AT       | 1 | 242872912 | 242872921 | 5       | .                  | .        | intergenic | .      | .             | 3 |
| AAAC.GTTT   | 1 | 243100746 | 243100765 | 5       | ENSSSCT00000005752 | CDC37L1  | intron     | 0.19   | rs790369434   | 2 |
| AC.GT       | 1 | 243408097 | 243408111 | 7.5     | .                  | .        | intergenic | -0.045 | rs788067360   | 4 |
| AAG.CTT     | 1 | 243431999 | 243432024 | 8.66667 | .                  | .        | intergenic | 0.296  | 263228 rs7866 | 3 |
| AAAAC.GTTTT | 1 | 243692888 | 243692915 | 4.66667 | .                  | .        | intergenic | .      | .             | 2 |
| AG.CT       | 1 | 243696491 | 243696509 | 9.5     | .                  | .        | intergenic | .      | rs788325201   | 3 |
| AC.GT       | 1 | 243966142 | 243966151 | 5       | ENSSSCT00000005757 | GLIS3    | intron     | 0.561  | rs788442659   | 2 |
| AC.GT       | 1 | 243966142 | 243966151 | 5       | ENSSSCT00000005758 | GLIS3    | intron     | 0.561  | rs788442659   | 2 |
| AC.GT       | 1 | 244075335 | 244075349 | 7.5     | .                  | .        | intergenic | .      | rs791346242   | 2 |
| AT.AT       | 1 | 244096162 | 244096171 | 5       | .                  | .        | intergenic | 0.238  | .             | 3 |
| AC.GT       | 1 | 244435177 | 244435219 | 21.5    | .                  | .        | intergenic | 0.15   | rs787391441   | 2 |
| AAAC.GTTT   | 1 | 244523078 | 244523093 | 4       | .                  | .        | intergenic | .      | rs788551564   | 2 |
| AGGGG.CCCCT | 1 | 244599002 | 244599016 | 3       | .                  | .        | intergenic | 0.056  | rs790844808   | 2 |
| ACAT.ATGT   | 1 | 245532578 | 245532595 | 4.5     | ENSSSCT00000005766 | SMARCA2  | intron     | 0.026  | rs793639137   | 2 |
| AT.AT       | 1 | 245701774 | 245701785 | 6       | .                  | .        | intergenic | 0.24   | rs788909449   | 2 |
| AT.AT       | 1 | 245711846 | 245711855 | 5       | .                  | .        | intergenic | 0.017  | rs786301555   | 2 |
| AT.AT       | 1 | 245745321 | 245745331 | 5.5     | .                  | .        | intergenic | 0.097  | rs692217869   | 2 |
| AAT.ATT     | 1 | 246494633 | 246494644 | 4       | .                  | .        | intergenic | -0.073 | rs789546339   | 2 |
| AAC.GTT     | 1 | 246775741 | 246775758 | 6       | .                  | .        | intergenic | .      | rs789522032   | 2 |
| AC.GT       | 1 | 247134011 | 247134020 | 5       | .                  | .        | intergenic | -0.158 | rs699871035   | 2 |
| AAAAC.GTTTT | 1 | 247424232 | 247424254 | 4.6     | ENSSSCT00000005769 | .        | intron     | 0.007  | 385949 rs7901 | 2 |
| AT.AT       | 1 | 247457282 | 247457293 | 6       | ENSSSCT00000005769 | .        | intron     | -0.078 | 356829 rs7938 | 3 |
| AC.GT       | 1 | 247564684 | 247564694 | 5.5     | ENSSSCT00000005774 | DOCK8    | intron     | 0.102  | rs787608350   | 2 |
| AAAC.GTTT   | 1 | 247697358 | 247697372 | 3.75    | ENSSSCT00000005774 | DOCK8    | intron     | 0.206  | 113728 rs7908 | 2 |
| AAAAC.GTTTT | 1 | 247829305 | 247829323 | 3.8     | .                  | .        | intergenic | .      | 348152 rs7884 | 2 |
| AAAC.GTTT   | 1 | 247878018 | 247878036 | 4.75    | .                  | .        | intergenic | .      | rs790391453   | 2 |
| AC.GT       | 1 | 248031213 | 248031223 | 5.5     | ENSSSCT00000005777 | PGM5     | intron     | 0.138  | .             | 4 |
| AT.AT       | 1 | 248318662 | 248318671 | 5       | .                  | .        | intergenic | .      | rs786921956   | 2 |
| AAAT.ATTT   | 1 | 248328596 | 248328613 | 4.5     | .                  | .        | intergenic | -0.05  | rs789370282   | 2 |
| AT.AT       | 1 | 248619841 | 248619851 | 5.5     | .                  | .        | intergenic | 0.058  | rs695132593   | 2 |
| AC.GT       | 1 | 248718751 | 248718762 | 6       | ENSSSCT00000027067 | FXN      | intron     | .      | 166570 rs7882 | 2 |
| AC.GT       | 1 | 248718751 | 248718762 | 6       | ENSSSCT00000005781 | TJP2     | intron     | .      | 166570 rs7882 | 2 |
| AAAT.ATTT   | 1 | 248738522 | 248738536 | 3.75    | ENSSSCT00000027067 | FXN      | intron     | 1.356  | rs790489107   | 3 |
| AAAT.ATTT   | 1 | 248738522 | 248738536 | 3.75    | ENSSSCT00000005781 | TJP2     | intron     | 1.356  | rs790489107   | 3 |
| AAAAC.GTTTT | 1 | 248974175 | 248974201 | 4.5     | ENSSSCT00000005783 | FAM189A2 | intron     | .      | rs791108184   | 2 |
| AAAC.GTTT   | 1 | 249128415 | 249128433 | 4.75    | .                  | .        | intergenic | -0.333 | rs790909030   | 2 |

|               |   |           |           |         |                    |         |            |        |                 |   |
|---------------|---|-----------|-----------|---------|--------------------|---------|------------|--------|-----------------|---|
| AAT.ATT       | 1 | 249236709 | 249236722 | 4.66667 | .                  | .       | intergenic | 0.013  | rs791701819     | 2 |
| AC.GT         | 1 | 249418897 | 249418922 | 13      | .                  | .       | intergenic | 0.153  | .               | 4 |
| AAAC.GTTT     | 1 | 249525150 | 249525170 | 5.25    | .                  | .       | intergenic | 0.097  | rs787553139     | 2 |
| AATG.CATT     | 1 | 249528006 | 249528029 | 6       | .                  | .       | intergenic | 0.055  | rs37784 rs7913  | 2 |
| AG.CT         | 1 | 249653827 | 249653836 | 5       | .                  | .       | intergenic | .      | rs788910759     | 2 |
| AAAAC.GTTTT   | 1 | 249877356 | 249877372 | 3.4     | ENSSSCT00000022526 | .       | intron     | .      | .               | 2 |
| AT.AT         | 1 | 250439790 | 250439802 | 6.5     | ENSSSCT00000005792 | .       | intron     | .      | 154485 rs7892   | 2 |
| AC.GT         | 1 | 250548949 | 250548959 | 5.5     | ENSSSCT00000005792 | .       | intron     | 0.508  | rs696600665     | 2 |
| AT.AT         | 1 | 250652573 | 250652591 | 9.5     | .                  | .       | intergenic | 0.011  | .               | 2 |
| AC.GT         | 1 | 250796974 | 250796990 | 8.5     | .                  | .       | intergenic | -0.16  | .               | 5 |
| AAC.GTT       | 1 | 250907551 | 250907566 | 5.33333 | .                  | .       | intergenic | 0.044  | rs300332 rs7921 | 2 |
| AC.GT         | 1 | 250971063 | 250971073 | 5.5     | .                  | .       | intergenic | 0.282  | rs75181 rs7903  | 4 |
| AC.GT         | 1 | 250995438 | 250995456 | 9.5     | .                  | .       | intergenic | .      | rs790124857     | 2 |
| AT.AT         | 1 | 251244818 | 251244828 | 5.5     | .                  | .       | intergenic | .      | rs792453852     | 2 |
| AAT.ATT       | 1 | 251362325 | 251362342 | 6       | .                  | .       | intergenic | 0.196  | rs789509170     | 2 |
| AAGG.CCTT     | 1 | 251624335 | 251624356 | 5.5     | .                  | .       | intergenic | 0.095  | rs790048187     | 2 |
| AG.CT         | 1 | 251784811 | 251784820 | 5       | ENSSSCT00000026837 | C9orf85 | intron     | 0.185  | .               | 2 |
| AT.AT         | 1 | 251895491 | 251895510 | 10      | .                  | .       | intergenic | .      | rs789192313     | 2 |
| AC.GT         | 1 | 251922983 | 251922997 | 7.5     | .                  | .       | intergenic | .      | rs786877099     | 2 |
| AAAC.GTTT     | 1 | 251982959 | 251982978 | 5       | .                  | .       | intergenic | .      | rs37391 rs7906  | 2 |
| AC.GT         | 1 | 251999913 | 251999923 | 5.5     | .                  | .       | intergenic | .      | .               | 4 |
| AG.CT         | 1 | 252723742 | 252723752 | 5.5     | .                  | .       | intergenic | 0.073  | rs789462631     | 2 |
| AC.GT         | 1 | 252776100 | 252776109 | 5       | .                  | .       | intergenic | -0.093 | .               | 2 |
| AAAAC.GTTTT   | 1 | 252914639 | 252914664 | 5.2     | .                  | .       | intergenic | -0.009 | rs792673784     | 2 |
| AAAT.ATTT     | 1 | 253051200 | 253051212 | 3.25    | .                  | .       | intergenic | -0.003 | rs112016 rs7878 | 2 |
| AT.AT         | 1 | 253111632 | 253111643 | 6       | .                  | .       | intergenic | .      | rs702742460     | 4 |
| AAT.ATT       | 1 | 253113130 | 253113143 | 4.66667 | .                  | .       | intergenic | .      | rs71066 rs7873  | 3 |
| AC.GT         | 1 | 253593166 | 253593175 | 5       | .                  | .       | intergenic | -0.02  | .               | 2 |
| AG.CT         | 1 | 253600941 | 253600953 | 6.5     | .                  | .       | intergenic | -0.214 | .               | 3 |
| AT.AT         | 1 | 254031336 | 254031346 | 5.5     | .                  | .       | intergenic | 0.338  | .               | 4 |
| AC.GT         | 1 | 254159280 | 254159294 | 7.5     | .                  | .       | intergenic | -0.064 | .               | 3 |
| AAAC.GTTT     | 1 | 254566628 | 254566655 | 7       | .                  | .       | intergenic | -0.209 | rs792903289     | 2 |
| AATG.CATT     | 1 | 254620865 | 254620887 | 5.75    | ENSSSCT00000005803 | RORB    | intron     | 0.095  | rs790316738     | 2 |
| AAAAC.GTTTT   | 1 | 254671474 | 254671492 | 3.8     | ENSSSCT00000005803 | RORB    | intron     | 0.908  | rs788203651     | 2 |
| AAAAAC.GTTTTT | 1 | 254750669 | 254750697 | 4.83333 | ENSSSCT00000005804 | TRPM6   | intron     | 0.193  | rs711263056     | 2 |
| AG.CT         | 1 | 254789402 | 254789417 | 8       | ENSSSCT00000005804 | TRPM6   | intron     | -0.009 | rs787072607     | 2 |
| AAAAT.ATTTT   | 1 | 254790145 | 254790169 | 5       | ENSSSCT00000005804 | TRPM6   | intron     | -0.035 | rs792209822     | 2 |
| AATG.CATT     | 1 | 255071859 | 255071872 | 3.5     | ENSSSCT00000005808 | OSTF1   | intron     | 0.3    | .               | 2 |
| AAAC.GTTT     | 1 | 255330464 | 255330499 | 9       | .                  | .       | intergenic | 0.03   | rs786259474     | 2 |
| AG.CT         | 1 | 255483015 | 255483029 | 7.5     | .                  | .       | intergenic | .      | rs166360 rs7902 | 2 |
| AGATAT.ATATC  | 1 | 255539086 | 255539122 | 6.16667 | .                  | .       | intergenic | .      | rs396306 rs7868 | 2 |
| AAAC.GTTT     | 1 | 255552880 | 255552899 | 5       | .                  | .       | intergenic | .      | rs792175322     | 2 |
| AG.CT         | 1 | 255576468 | 255576489 | 11      | .                  | .       | intergenic | 0.056  | rs71338 rs7925  | 2 |
| ACAT.ATGT     | 1 | 255660920 | 255660944 | 6.25    | ENSSSCT00000024731 | PCSK5   | intron     | 0.345  | rs791410765     | 2 |
| AATC.GATT     | 1 | 255833271 | 255833294 | 6       | .                  | .       | intergenic | .      | rs789507914     | 2 |
| AT.AT         | 1 | 256209346 | 256209361 | 8       | .                  | .       | intergenic | .      | rs787640429     | 2 |
| AC.GT         | 1 | 256264906 | 256264917 | 6       | .                  | .       | intergenic | -0.347 | rs789636832     | 2 |
| AT.AT         | 1 | 256281712 | 256281747 | 18      | .                  | .       | intergenic | .      | .               | 2 |
| AT.AT         | 1 | 256290092 | 256290122 | 15.5    | .                  | .       | intergenic | .      | rs792886975     | 2 |
| AAAAC.GTTTT   | 1 | 256351327 | 256351348 | 4.4     | ENSSSCT00000005813 | PRUNE2  | intron     | 0.387  | rs309520 rs7880 | 2 |
| AAAC.GTTT     | 1 | 256705340 | 256705358 | 4.75    | .                  | .       | intergenic | -0.008 | rs354834 rs7917 | 2 |
| AAAAC.GTTTT   | 1 | 256766231 | 256766256 | 5.2     | .                  | .       | intergenic | 0.363  | rs128187 rs7868 | 4 |
| AAAC.GTTT     | 1 | 257000970 | 257000992 | 5.75    | ENSSSCT00000005817 | VPS13A  | intron     | 0.056  | rs792266996     | 2 |
| AAAAC.GTTTT   | 1 | 257037351 | 257037374 | 4.8     | ENSSSCT00000005817 | VPS13A  | intron     | .      | rs786388844     | 2 |
| AAAT.ATTT     | 1 | 257203942 | 257203960 | 4.75    | ENSSSCT00000005819 | GNA14   | intron     | -0.198 | rs307180 rs7936 | 2 |
| AC.GT         | 1 | 257256139 | 257256152 | 7       | ENSSSCT00000005819 | GNA14   | intron     | .      | rs300032 rs7919 | 4 |
| AC.GT         | 1 | 257295261 | 257295272 | 6       | ENSSSCT00000005819 | GNA14   | intron     | 0.191  | .               | 2 |
| AAGAG.CTCTT   | 1 | 257584258 | 257584277 | 4       | .                  | .       | intergenic | 0.498  | rs313519 rs7891 | 2 |
| AG.CT         | 1 | 257703587 | 257703599 | 6.5     | .                  | .       | intergenic | 0.046  | rs791754582     | 2 |
| TCCCC.GGGGA   | 1 | 257818486 | 257818509 | 4       | ENSSSCT00000005824 | PSAT1   | intron     | 2.169  | rs789398984     | 2 |
| AC.GT         | 1 | 257820102 | 257820124 | 11.5    | ENSSSCT00000005824 | PSAT1   | intron     | -0.172 | rs388211 rs7934 | 2 |
| AAAC.GTTT     | 1 | 257840482 | 257840510 | 7.25    | .                  | .       | intergenic | 0.126  | rs789096332     | 2 |
| AAAG.CTTT     | 1 | 257942074 | 257942095 | 5.5     | .                  | .       | intergenic | -0.042 | rs374865 rs7892 | 2 |
| AT.AT         | 1 | 258233761 | 258233782 | 11      | .                  | .       | intergenic | .      | rs789587549     | 2 |
| AAAT.ATTT     | 1 | 258309934 | 258309952 | 4.75    | .                  | .       | intergenic | .      | rs789410528     | 2 |
| AC.GT         | 1 | 258359134 | 258359150 | 8.5     | .                  | .       | intergenic | 0.146  | rs384886 rs7901 | 2 |
| AAAC.GTTT     | 1 | 258446892 | 258446907 | 4       | .                  | .       | intergenic | 0.034  | rs384397 rs7864 | 2 |
| AC.GT         | 1 | 258522622 | 258522646 | 12.5    | .                  | .       | intergenic | 1.472  | rs306470 rs7921 | 2 |
| AAGG.CCTT     | 1 | 258544900 | 258544920 | 5.25    | .                  | .       | intergenic | 0.062  | rs786857248     | 2 |
| AC.GT         | 1 | 259032204 | 259032214 | 5.5     | .                  | .       | intergenic | 1.851  | rs791440978     | 2 |
| AAAC.GTTT     | 1 | 259407745 | 259407759 | 3.75    | .                  | .       | intergenic | 0.117  | rs791402252     | 2 |
| AAAC.GTTT     | 1 | 259959067 | 259959094 | 7       | .                  | .       | intergenic | -0.061 | rs793461800     | 2 |
| AC.GT         | 1 | 260006911 | 260006931 | 10.5    | .                  | .       | intergenic | 0.117  | .               | 2 |
| AAT.ATT       | 1 | 260338753 | 260338770 | 6       | .                  | .       | intergenic | 0.353  | rs350525 rs7136 | 2 |
| AAAC.GTTT     | 1 | 260486784 | 260486804 | 5.25    | .                  | .       | intergenic | .      | rs786872240     | 2 |
| ACC.GGT       | 1 | 260584626 | 260584660 | 11.6667 | .                  | .       | intergenic | -0.015 | rs711012884     | 4 |
| AAAGG.CTTT    | 1 | 260721999 | 260722017 | 3.16667 | .                  | .       | intergenic | 0.047  | rs311333 rs7918 | 2 |
| AAC.CTT       | 1 | 260725490 | 260725509 | 6.66667 | .                  | .       | intergenic | 0.13   | rs791670677     | 2 |
| ACAT.ATGT     | 1 | 261736431 | 261736458 | 7       | .                  | .       | intergenic | 0.513  | rs787657392     | 2 |
| AAAC.GTTT     | 1 | 261820417 | 261820444 | 7       | ENSSSCT00000005828 | TLE1    | intron     | 0.312  | rs197019 rs7930 | 2 |
| AAAT.ATTT     | 1 | 262055649 | 262055670 | 5.5     | .                  | .       | intergenic | -0.002 | rs787692642     | 2 |
| ACCT.AGGT     | 1 | 262149642 | 262149664 | 5.75    | .                  | .       | intergenic | 0.223  | rs791979606     | 2 |
| AAAG.CTTT     | 1 | 262435099 | 262435113 | 3.75    | .                  | .       | intergenic | 0.15   | .               | 2 |
| AAAC.GTTT     | 1 | 262443239 | 262443261 | 5.75    | .                  | .       | intergenic | 0.203  | rs788174140     | 2 |

|               |   |           |           |         |                    |         |            |        |               |   |
|---------------|---|-----------|-----------|---------|--------------------|---------|------------|--------|---------------|---|
| AG.CT         | 1 | 262617368 | 262617381 | 7       | .                  | .       | intergenic | .      | 355894 rs7909 | 2 |
| AC.GT         | 1 | 262713548 | 262713559 | 6       | .                  | .       | intergenic | 0.239  | .             | 3 |
| AC.GT         | 1 | 263326543 | 263326552 | 5       | .                  | .       | intergenic | 0.163  | rs793751484   | 2 |
| AAC.GTT       | 1 | 263364936 | 263364953 | 6       | .                  | .       | intergenic | .      | rs793742188   | 2 |
| AAAAC.GTTTT   | 1 | 263846716 | 263846745 | 6       | ENSSSCT00000005843 | UNC13B  | intron     | 0.233  | rs787910726   | 2 |
| AT.AT         | 1 | 263963666 | 263963677 | 6       | ENSSSCT00000005845 | .       | intron     | .      | rs791555299   | 3 |
| AG.CT         | 1 | 264132460 | 264132470 | 5.5     | ENSSSCT00000005854 | TPM2    | intron     | 0.475  | rs793794750   | 2 |
| AAAG.CTTT     | 1 | 264205318 | 264205339 | 5.5     | .                  | .       | intergenic | .      | rs792390355   | 3 |
| AC.GT         | 1 | 264309440 | 264309450 | 5.5     | .                  | .       | intergenic | -0.066 | 111413 rs7881 | 4 |
| AAC.GTT       | 1 | 264328482 | 264328506 | 8.33333 | .                  | .       | intergenic | .      | rs786917869   | 2 |
| AAAT.ATTT     | 1 | 264700907 | 264700928 | 5.5     | ENSSSCT00000005877 | RECK    | intron     | 0.302  | rs787193157   | 2 |
| AAC.GTT       | 1 | 264737354 | 264737368 | 5       | .                  | .       | intergenic | .      | .             | 2 |
| AAC.GTT       | 1 | 264973757 | 264973782 | 8.66667 | .                  | .       | intergenic | -0.035 | rs787315253   | 3 |
| AC.GT         | 1 | 265001384 | 265001394 | 5.5     | .                  | .       | intergenic | .      | rs786232991   | 2 |
| AAAAC.GTTTT   | 1 | 265003129 | 265003144 | 3.2     | .                  | .       | intergenic | 0.155  | 300363 rs7909 | 2 |
| AAC.GTT       | 1 | 265192041 | 265192053 | 4.33333 | ENSSSCT00000005883 | MELK    | intron     | 0.152  | rs788533262   | 2 |
| AG.CT         | 1 | 265235969 | 265235981 | 6.5     | ENSSSCT00000005883 | MELK    | intron     | .      | rs790142761   | 2 |
| AAAAAC.GTTTTT | 1 | 265307146 | 265307166 | 3.5     | .                  | .       | intergenic | 0.221  | rs788128816   | 2 |
| AT.AT         | 1 | 265352792 | 265352813 | 11      | .                  | .       | intergenic | 0.168  | rs790715294   | 2 |
| AC.GT         | 1 | 265392411 | 265392435 | 12.5    | .                  | .       | intergenic | -0.324 | .             | 2 |
| AAG.CTT       | 1 | 265399580 | 265399592 | 4.33333 | .                  | .       | intergenic | 0.227  | rs787448143   | 2 |
| AAG.CTT       | 1 | 265405209 | 265405233 | 8.33333 | .                  | .       | intergenic | 0.644  | .             | 2 |
| AAAC.GTTT     | 1 | 265418912 | 265418931 | 5       | .                  | .       | intergenic | 0.956  | rs790025999   | 3 |
| AAAC.GTTT     | 1 | 265435029 | 265435043 | 3.75    | .                  | .       | intergenic | 0.075  | rs788067110   | 2 |
| AAAC.GTTT     | 1 | 265486462 | 265486479 | 4.5     | ENSSSCT00000005884 | PAX5    | intron     | .      | rs788991063   | 2 |
| AAAT.ATTT     | 1 | 265586830 | 265586851 | 5.5     | ENSSSCT00000005884 | PAX5    | intron     | 0.13   | rs787423838   | 2 |
| AATC.GATT     | 1 | 266026484 | 266026495 | 3       | .                  | .       | intergenic | .      | .             | 2 |
| AAAG.CTTT     | 1 | 266234926 | 266234938 | 3.25    | ENSSSCT00000005889 | .       | intron     | .      | rs793669994   | 2 |
| AAAAC.GTTTT   | 1 | 266383443 | 266383457 | 3       | ENSSSCT00000005892 | FRMPD1  | intron     | 0.053  | rs790531402   | 2 |
| AC.GT         | 1 | 266435026 | 266435042 | 8.5     | ENSSSCT00000005892 | FRMPD1  | intron     | 1.516  | rs792541181   | 2 |
| AAAC.GTTT     | 1 | 266677477 | 266677503 | 6.75    | .                  | .       | intergenic | -0.007 | rs787440082   | 3 |
| ACAG.CTGT     | 1 | 266876858 | 266876879 | 5.5     | .                  | .       | intergenic | 0.351  | rs792698595   | 2 |
| AG.CT         | 1 | 266962429 | 266962440 | 6       | .                  | .       | intergenic | -0.059 | rs793372049   | 2 |
| AC.GT         | 1 | 267235082 | 267235098 | 8.5     | .                  | .       | intergenic | -0.141 | rs786939698   | 2 |
| AAC.GTT       | 1 | 267261615 | 267261631 | 5.66667 | ENSSSCT00000027712 | CCDC180 | intron     | .      | rs791532007   | 4 |
| AATG.CATT     | 1 | 267310940 | 267310972 | 8.25    | ENSSSCT00000027712 | CCDC180 | intron     | -0.081 | 106422 rs7929 | 2 |
| AG.CT         | 1 | 267402394 | 267402404 | 5.5     | ENSSSCT00000005904 | TDRD7   | intron     | 0.021  | rs787468622   | 3 |
| AAAT.ATTT     | 1 | 267405219 | 267405250 | 8       | ENSSSCT00000005904 | TDRD7   | intron     | 0.137  | .             | 2 |
| AAAC.GTTT     | 1 | 267591764 | 267591789 | 6.5     | ENSSSCT00000005906 | NCBP1   | cds        | 3.377  | rs793548265   | 2 |
| AAAC.GTTT     | 1 | 267591764 | 267591789 | 6.5     | ENSSSCT00000027470 | TMOD1   | intron     | 3.377  | rs793548265   | 2 |
| AAAC.GTTT     | 1 | 267591764 | 267591789 | 6.5     | ENSSSCT00000005906 | NCBP1   | intron     | 3.377  | rs793548265   | 2 |
| AAAAC.GTTTT   | 1 | 267632306 | 267632328 | 4.6     | ENSSSCT00000005906 | NCBP1   | intron     | -0.113 | rs792019976   | 2 |
| AAAAC.GTTTT   | 1 | 267632306 | 267632328 | 4.6     | ENSSSCT00000027470 | TMOD1   | intron     | -0.113 | rs792019976   | 2 |
| AC.GT         | 1 | 267691007 | 267691023 | 8.5     | ENSSSCT00000005908 | XPA     | intron     | .      | rs788452866   | 2 |
| AAAAC.GTTTT   | 1 | 267918577 | 267918599 | 4.6     | .                  | .       | intergenic | .      | .             | 2 |
| AAAC.GTTT     | 1 | 268067250 | 268067264 | 3.75    | ENSSSCT00000005913 | NANS    | intron     | .      | 375527 rs7881 | 2 |
| AT.AT         | 1 | 268075050 | 268075062 | 6.5     | ENSSSCT00000005913 | NANS    | intron     | .      | rs792571617   | 2 |
| AC.GT         | 1 | 268077804 | 268077814 | 5.5     | ENSSSCT00000005913 | NANS    | intron     | 0.126  | 193746 rs7934 | 2 |
| AC.GT         | 1 | 268174386 | 268174396 | 5.5     | .                  | .       | intergenic | -0.243 | rs793646951   | 2 |
| AG.CT         | 1 | 268214730 | 268214740 | 5.5     | ENSSSCT00000005916 | TBC1D2  | intron     | -0.183 | rs788208773   | 2 |
| AT.AT         | 1 | 268223127 | 268223138 | 6       | .                  | .       | intergenic | 0.154  | 394296 rs7881 | 2 |
| AC.GT         | 1 | 268284288 | 268284307 | 10      | ENSSSCT00000025444 | .       | intron     | 0.021  | .             | 2 |
| AG.CT         | 1 | 268315441 | 268315450 | 5       | ENSSSCT00000025444 | .       | intron     | -0.199 | .             | 2 |
| AAC.GTT       | 1 | 268383105 | 268383118 | 4.66667 | ENSSSCT00000005917 | .       | intron     | 0.157  | rs788512954   | 2 |
| AAAAC.GTTTT   | 1 | 268388170 | 268388193 | 4.8     | ENSSSCT00000005917 | .       | intron     | 0.061  | .             | 4 |
| AT.AT         | 1 | 268444287 | 268444313 | 13.5    | ENSSSCT00000005917 | .       | intron     | 0.355  | rs790663100   | 2 |
| AAAC.GTTT     | 1 | 269309624 | 269309646 | 5.75    | .                  | .       | intergenic | -0.136 | 393562 rs7927 | 2 |
| AG.CT         | 1 | 269838617 | 269838630 | 7       | ENSSSCT00000005925 | NOR-1   | intron     | 2.63   | rs790788355   | 2 |
| AAAT.ATTT     | 1 | 270006928 | 270006938 | 5.5     | .                  | .       | intergenic | 0.131  | rs790203602   | 3 |
| AAAAG.CTTTT   | 1 | 270248909 | 270248930 | 4.4     | ENSSSCT00000005931 | INVS    | intron     | .      | rs788083919   | 2 |
| AT.AT         | 1 | 270542615 | 270542626 | 6       | ENSSSCT00000005933 | MSANTD3 | intron     | .      | rs788433485   | 3 |
| AAAC.GTTT     | 1 | 270574196 | 270574223 | 7       | ENSSSCT00000005934 | .       | promoter   | 0.31   | .             | 2 |
| AAAT.ATTT     | 1 | 270742806 | 270742827 | 5.5     | .                  | .       | intergenic | -0.228 | 299017 rs7927 | 2 |
| ACAT.ATGT     | 1 | 270831601 | 270831628 | 7       | .                  | .       | intergenic | 0.016  | rs787611906   | 2 |
| AAC.GTT       | 1 | 270983569 | 270983582 | 4.66667 | .                  | .       | intergenic | .      | rs789231471   | 2 |
| AG.CT         | 1 | 270991754 | 270991763 | 5       | .                  | .       | intergenic | 0.135  | .             | 3 |
| AAAAAT.ATTTTT | 1 | 271021687 | 271021712 | 4.33333 | .                  | .       | intergenic | .      | rs790976326   | 2 |
| AAAC.GTTT     | 1 | 271180161 | 271180183 | 5.75    | .                  | .       | intergenic | 0.061  | rs789856446   | 3 |
| AT.AT         | 1 | 271357851 | 271357869 | 9.5     | .                  | .       | intergenic | 0.823  | rs786495799   | 2 |
| AT.AT         | 1 | 271401980 | 271401992 | 6.5     | .                  | .       | intergenic | .      | rs788845460   | 3 |
| AC.GT         | 1 | 271439660 | 271439671 | 6       | .                  | .       | intergenic | 0.016  | .             | 2 |
| AC.GT         | 1 | 271498404 | 271498417 | 7       | ENSSSCT00000005936 | .       | intron     | -0.027 | 104455 rs7934 | 2 |
| AAAG.CTTT     | 1 | 271651716 | 271651730 | 3.75    | .                  | .       | intergenic | 0.007  | rs790009438   | 2 |
| AAAT.ATTT     | 1 | 271835521 | 271835542 | 5.5     | .                  | .       | intergenic | .      | 356295 rs7896 | 2 |
| AAAC.GTTT     | 1 | 271878992 | 271879012 | 5.25    | ENSSSCT00000005943 | GRIN3A  | intron     | 0.192  | rs792118443   | 2 |
| AT.AT         | 1 | 271953083 | 271953115 | 16.5    | ENSSSCT00000005943 | GRIN3A  | intron     | 0.157  | rs790922929   | 7 |
| AC.GT         | 1 | 272174674 | 272174689 | 8       | .                  | .       | intergenic | 0.078  | 303970 rs7884 | 2 |
| AAT.ATT       | 1 | 272233128 | 272233139 | 4       | .                  | .       | intergenic | 0.607  | .             | 2 |
| AAAAG.CTTTT   | 1 | 272292274 | 272292290 | 3.4     | .                  | .       | intergenic | 0.044  | rs789093622   | 2 |
| AT.AT         | 1 | 272746581 | 272746591 | 5.5     | .                  | .       | intergenic | .      | rs788850838   | 2 |
| AT.AT         | 1 | 272758026 | 272758043 | 9       | .                  | .       | intergenic | .      | .             | 2 |
| AAAAC.GTTTT   | 1 | 272996971 | 272996986 | 3.2     | .                  | .       | intergenic | -0.145 | rs790174932   | 2 |
| AAT.ATT       | 1 | 273024467 | 273024488 | 7.33333 | .                  | .       | intergenic | 0.169  | rs791537208   | 2 |
| AC.GT         | 1 | 273061239 | 273061248 | 5       | .                  | .       | intergenic | .      | .             | 4 |

|               |   |           |           |         |                    |          |            |        |                   |   |
|---------------|---|-----------|-----------|---------|--------------------|----------|------------|--------|-------------------|---|
| AAAAC.GTTTT   | 1 | 273085229 | 273085245 | 3.4     | .                  | .        | intergenic | .      | rs791563778       | 2 |
| AAC.GTT       | 1 | 273289902 | 273289913 | 4       | .                  | .        | intergenic | .      | rs793754918       | 2 |
| AT.AT         | 1 | 273616322 | 273616336 | 7.5     | .                  | .        | intergenic | 0.072  | rs787501189       | 2 |
| AAAC.GTTT     | 1 | 273625203 | 273625221 | 4.75    | .                  | .        | intergenic | -0.223 | rs793874584       | 2 |
| AT.AT         | 1 | 273673546 | 273673559 | 7       | .                  | .        | intergenic | -0.048 | rs786591841       | 4 |
| AT.AT         | 1 | 273680718 | 273680729 | 6       | .                  | .        | intergenic | 0.086  | rs788371582       | 2 |
| AC.GT         | 1 | 274669091 | 274669115 | 12.5    | .                  | .        | intergenic | 0.278  | rs786270839       | 2 |
| AAC.GTT       | 1 | 274702357 | 274702372 | 5.33333 | .                  | .        | intergenic | .      | rs696427781       | 3 |
| AAC.GTT       | 1 | 275762746 | 275762759 | 4.66667 | ENSSSCT00000005966 | .        | intron     | 0.048  | rs787056651       | 3 |
| AAT.ATT       | 1 | 275883692 | 275883717 | 8.66667 | .                  | .        | intergenic | 0.381  | rs787438476       | 2 |
| AAAAC.GTTTT   | 1 | 275918634 | 275918653 | 4       | .                  | .        | intergenic | 0.167  | rs786940753       | 2 |
| AAAT.ATTT     | 1 | 275934031 | 275934064 | 8.5     | .                  | .        | intergenic | 0.147  | rs793853871       | 2 |
| AT.AT         | 1 | 276122793 | 276122803 | 5.5     | .                  | .        | intergenic | 0.099  | rs3203 rs7869     | 2 |
| AAT.ATT       | 1 | 276228672 | 276228685 | 4.66667 | ENSSSCT00000034909 | SLC44A1  | intron     | 0.188  | rs786637055       | 2 |
| AAT.ATT       | 1 | 276228672 | 276228685 | 4.66667 | ENSSSCT00000033541 | SLC44A1  | intron     | 0.188  | rs786637055       | 2 |
| AAT.ATT       | 1 | 276228672 | 276228685 | 4.66667 | ENSSSCT00000033835 | SLC44A1  | intron     | 0.188  | rs786637055       | 2 |
| AAAT.ATTT     | 1 | 276343188 | 276343204 | 4.25    | ENSSSCT00000034909 | SLC44A1  | intron     | 0.071  | rs793358438       | 2 |
| AAAT.ATTT     | 1 | 276343188 | 276343204 | 4.25    | ENSSSCT00000005968 | SLC44A1  | intron     | 0.071  | rs793358438       | 2 |
| AAAT.ATTT     | 1 | 276343188 | 276343204 | 4.25    | ENSSSCT00000033541 | SLC44A1  | intron     | 0.071  | rs793358438       | 2 |
| AAAT.ATTT     | 1 | 276343188 | 276343204 | 4.25    | ENSSSCT00000033835 | SLC44A1  | intron     | 0.071  | rs793358438       | 2 |
| AGAT.ATCT     | 1 | 276921343 | 276921372 | 7.5     | .                  | .        | intergenic | 0.249  | rs71417 rs7888    | 4 |
| AAAC.GTTT     | 1 | 277209481 | 277209508 | 7       | .                  | .        | intergenic | 0.083  | rs792208659       | 4 |
| AT.AT         | 1 | 278345247 | 278345257 | 5.5     | .                  | .        | intergenic | 0.096  | rs787439489       | 3 |
| AT.AT         | 1 | 278652579 | 278652589 | 5.5     | .                  | .        | intergenic | 0.116  | rs790065614       | 2 |
| AAAC.GTTT     | 1 | 278696633 | 278696655 | 5.75    | .                  | .        | intergenic | 0.349  | rs704650 rs7933   | 2 |
| AAAC.GTTT     | 1 | 278721639 | 278721656 | 4.5     | .                  | .        | intergenic | -0.051 | rs79079 rs7881    | 2 |
| AC.GT         | 1 | 278736955 | 278736969 | 7.5     | .                  | .        | intergenic | 0.35   | rs786495878       | 2 |
| AAC.GTT       | 1 | 278919031 | 278919047 | 5.66667 | ENSSSCT00000005980 | RAD23B   | intron     | .      | rs791349395       | 2 |
| AATG.CATT     | 1 | 278981242 | 278981262 | 5.25    | .                  | .        | intergenic | 0.124  | rs791643113       | 2 |
| AT.AT         | 1 | 279115732 | 279115748 | 8.5     | .                  | .        | intergenic | .      | rs789305394       | 2 |
| AT.AT         | 1 | 279169476 | 279169486 | 5.5     | .                  | .        | intergenic | -0.083 | .                 | 2 |
| AAAT.ATTT     | 1 | 279308067 | 279308094 | 7       | .                  | .        | intergenic | .      | rs789897842       | 2 |
| AC.GT         | 1 | 279316784 | 279316797 | 7       | .                  | .        | intergenic | 0.119  | rs787084421       | 2 |
| AG.CT         | 1 | 279373943 | 279373956 | 7       | .                  | .        | intergenic | -0.01  | rs745498 rs7924   | 2 |
| AT.AT         | 1 | 279530627 | 279530639 | 6.5     | .                  | .        | intergenic | 0.075  | .                 | 2 |
| ACAT.ATGT     | 1 | 279999791 | 279999816 | 6.5     | .                  | .        | intergenic | 0.553  | rs786621692       | 2 |
| AAAT.ATTT     | 1 | 280010475 | 280010512 | 9.5     | .                  | .        | intergenic | 0.221  | rs790768977       | 2 |
| AAT.ATT       | 1 | 280096310 | 280096323 | 4.66667 | .                  | .        | intergenic | 0.097  | rs790737867       | 3 |
| AAAC.GTTT     | 1 | 280216619 | 280216642 | 6       | .                  | .        | intergenic | -0.002 | rs791761796       | 4 |
| AG.CT         | 1 | 280293377 | 280293394 | 9       | .                  | .        | intergenic | -0.056 | .                 | 2 |
| AAG.CTT       | 1 | 280319828 | 280319845 | 6       | .                  | .        | intergenic | 0.144  | rs793810552       | 2 |
| AC.GT         | 1 | 280323233 | 280323243 | 5.5     | .                  | .        | intergenic | -0.009 | .                 | 2 |
| AAT.ATT       | 1 | 280774865 | 280774878 | 4.66667 | ENSSSCT00000005990 | EPB41L4B | intron     | .      | rs789057314       | 2 |
| AT.AT         | 1 | 281393587 | 281393598 | 6       | .                  | .        | intergenic | .      | rs790322732       | 3 |
| AC.GT         | 1 | 281423614 | 281423628 | 7.5     | .                  | .        | intergenic | 0.333  | .                 | 2 |
| AG.CT         | 1 | 281829450 | 281829459 | 5       | .                  | .        | intergenic | 0.121  | rs792685861       | 2 |
| AAAG.CTTT     | 1 | 281879360 | 281879388 | 7.25    | .                  | .        | intergenic | 0.202  | rs753050 rs7899   | 3 |
| AAAT.ATTT     | 1 | 282041284 | 282041300 | 4.25    | ENSSSCT00000005998 | TXN      | intron     | .      | rs798121 rs7927   | 2 |
| AAAT.ATTT     | 1 | 282081817 | 282081846 | 7.5     | .                  | .        | intergenic | 0.072  | rs793717781       | 2 |
| AAAAG.CTTTT   | 1 | 282103096 | 282103116 | 4.2     | .                  | .        | intergenic | 0.027  | rs764056 rs7925   | 2 |
| AAAC.GTTT     | 1 | 282166986 | 282167000 | 3.75    | ENSSSCT00000006000 | SVEP1    | intron     | -0.012 | rs789545329       | 2 |
| ATC.GAT       | 1 | 282326357 | 282326371 | 5       | .                  | .        | intergenic | 0.231  | rs780614 rs7901   | 2 |
| AAAT.ATTT     | 1 | 282411724 | 282411746 | 5.75    | .                  | .        | intergenic | .      | rs710638899       | 2 |
| AAAAAT.ATTTTT | 1 | 282421330 | 282421347 | 3       | .                  | .        | intergenic | .      | rs706559 rs7883   | 2 |
| AATT.AATT     | 1 | 282488774 | 282488804 | 7.75    | ENSSSCT00000025482 | MUSK     | intron     | .      | rs790848194       | 2 |
| AATT.AATT     | 1 | 282488774 | 282488804 | 7.75    | ENSSSCT00000006001 | MUSK     | intron     | .      | rs790848194       | 2 |
| ACCT.AGGT     | 1 | 282567854 | 282567866 | 3.25    | .                  | .        | intergenic | 0.208  | .                 | 2 |
| AATG.CATT     | 1 | 282577821 | 282577862 | 10.5    | .                  | .        | intergenic | 0.057  | rs704598 rs7895   | 2 |
| AAAC.GTTT     | 1 | 282891846 | 282891860 | 3.75    | .                  | .        | intergenic | 0.013  | rs792713268       | 2 |
| AAT.ATT       | 1 | 282954869 | 282954887 | 6.33333 | .                  | .        | intergenic | 0.306  | rs787482397       | 2 |
| AG.CT         | 1 | 283090760 | 283090773 | 7       | ENSSSCT00000006004 | KIAA0368 | intron     | 1.526  | rs719986 rs7898   | 2 |
| AAC.GTT       | 1 | 283092347 | 283092360 | 4.66667 | ENSSSCT00000006004 | KIAA0368 | intron     | .      | rs793404741       | 2 |
| AAAG.CTTT     | 1 | 283178294 | 283178316 | 5.75    | ENSSSCT00000028358 | PTGR1    | promoter   | .      | rs7036130 rs7926  | 2 |
| AAG.CTT       | 1 | 283223732 | 283223750 | 6.33333 | ENSSSCT00000006005 | DNAJC25  | intron     | 0.202  | rs789806971       | 2 |
| AAT.ATT       | 1 | 283289688 | 283289702 | 5       | .                  | .        | intergenic | 0.295  | .                 | 2 |
| AAAC.GTTT     | 1 | 283363874 | 283363897 | 6       | .                  | .        | intergenic | .      | rs792781549       | 2 |
| AT.AT         | 1 | 283461861 | 283461871 | 5.5     | ENSSSCT00000024726 | UGCG     | intron     | 0.236  | rs786291314       | 2 |
| AAAC.GTTT     | 1 | 283464372 | 283464388 | 4.25    | ENSSSCT00000024726 | UGCG     | intron     | 0.325  | rs762195 rs7874   | 2 |
| AAAC.GTTT     | 1 | 283477321 | 283477334 | 3.5     | ENSSSCT00000024726 | UGCG     | 3'utr      | 1.93   | rs787158087       | 2 |
| AT.AT         | 1 | 283733410 | 283733431 | 11      | ENSSSCT00000006011 | SUSD1    | intron     | 0.248  | rs788429302       | 2 |
| AAAT.ATTT     | 1 | 283869449 | 283869471 | 5.75    | .                  | .        | intergenic | .      | rs7057160 rs7935  | 2 |
| AT.AT         | 1 | 283882974 | 283882987 | 7       | .                  | .        | intergenic | 0.35   | rs7030035 rs7919  | 2 |
| AAAC.GTTT     | 1 | 283899942 | 283899961 | 5       | .                  | .        | intergenic | .      | rs789052328       | 2 |
| AC.GT         | 1 | 284342716 | 284342742 | 13.5    | ENSSSCT00000006017 | SNX30    | intron     | 0.054  | rs789017796       | 3 |
| AAC.GTT       | 1 | 284360126 | 284360145 | 6.66667 | .                  | .        | intergenic | -0.018 | rs70312570 rs7888 | 2 |
| AAT.ATT       | 1 | 284404144 | 284404163 | 6.66667 | .                  | .        | intergenic | .      | rs792705242       | 2 |
| AT.AT         | 1 | 284474631 | 284474640 | 5       | .                  | .        | intergenic | 0.19   | .                 | 2 |
| AT.AT         | 1 | 284517141 | 284517153 | 6.5     | .                  | .        | intergenic | 0.167  | rs792495533       | 2 |
| AAAG.CTTT     | 1 | 284570995 | 284571009 | 3.75    | .                  | .        | intergenic | 0.174  | rs7088560 rs7898  | 2 |
| AAAT.ATTT     | 1 | 284891476 | 284891496 | 5.25    | ENSSSCT00000006026 | .        | intron     | -0.064 | rs792882540       | 2 |
| AAC.GTT       | 1 | 284963048 | 284963076 | 9.66667 | ENSSSCT00000006026 | .        | intron     | 0.088  | rs787802400       | 2 |
| AC.GT         | 1 | 285069130 | 285069139 | 5       | .                  | .        | intergenic | -0.655 | .                 | 3 |
| AAC.GTT       | 1 | 285487791 | 285487802 | 4       | .                  | .        | intergenic | 0.262  | rs791873223       | 2 |
| AAAC.GTTT     | 1 | 285558479 | 285558497 | 4.75    | .                  | .        | intergenic | 0.311  | rs779104 rs7902   | 2 |



|              |   |           |           |         |                    |        |            |        |             |        |   |
|--------------|---|-----------|-----------|---------|--------------------|--------|------------|--------|-------------|--------|---|
| AAAT.ATTT    | 1 | 285580537 | 285580559 | 5.75    | .                  | .      | intergenic | -0.284 | rs58862     | rs7912 | 2 |
| AC.GT        | 1 | 285670647 | 285670659 | 6.5     | ENSSSCT0000006030  | ZNF618 | intron     | -0.003 | rs791785667 |        | 2 |
| AT.AT        | 1 | 286276872 | 286276881 | 5       | .                  | .      | intergenic | 0.092  | rs791057608 |        | 2 |
| AAAC.GTTT    | 1 | 286288627 | 286288639 | 3.25    | .                  | .      | intergenic | .      | rs5712      | rs7928 | 2 |
| AAAC.GTTT    | 1 | 286326333 | 286326348 | 4       | .                  | .      | intergenic | 0.809  | rs1780      | rs7874 | 2 |
| AAAC.GTTT    | 1 | 286519198 | 286519221 | 6       | .                  | .      | intergenic | 0.159  | rs792932811 |        | 2 |
| AAC.GTT      | 1 | 286807205 | 286807229 | 8.33333 | ENSSSCT00000023943 | .      | intron     | .      | rs4868      | rs7866 | 2 |
| AAC.GTT      | 1 | 286807205 | 286807229 | 8.33333 | ENSSSCT0000006041  | .      | intron     | .      | rs4868      | rs7866 | 2 |
| AAC.GTT      | 1 | 286807205 | 286807229 | 8.33333 | ENSSSCT00000032138 | .      | intron     | .      | rs4868      | rs7866 | 2 |
| AAAC.GTTT    | 1 | 286923768 | 286923782 | 3.75    | .                  | .      | intergenic | .      | rs792050705 |        | 2 |
| AG.CT        | 1 | 287135699 | 287135712 | 7       | .                  | .      | intergenic | 0.303  | rs792386815 |        | 2 |
| AAC.GTT      | 1 | 287171776 | 287171795 | 6.66667 | .                  | .      | intergenic | 0.285  | rs792353633 |        | 2 |
| AG.CT        | 1 | 287189685 | 287189721 | 18.5    | .                  | .      | intergenic | 0.245  | rs303416    | rs7921 | 3 |
| AC.GT        | 1 | 287221589 | 287221601 | 6.5     | .                  | .      | intergenic | -0.177 | rs13579     | rs7900 | 2 |
| ACAT.ATGT    | 1 | 287461760 | 287461779 | 5       | .                  | .      | intergenic | -0.253 | rs788480697 |        | 2 |
| AT.AT        | 1 | 287509281 | 287509292 | 6       | .                  | .      | intergenic | -0.157 | rs694102459 |        | 4 |
| AAGG.CCTT    | 1 | 287698199 | 287698212 | 3.5     | .                  | .      | intergenic | 0.038  | .           |        | 2 |
| AG.CT        | 1 | 287711404 | 287711413 | 5       | .                  | .      | intergenic | -0.013 | .           |        | 3 |
| AC.GT        | 1 | 287730480 | 287730492 | 6.5     | .                  | .      | intergenic | .      | rs789526364 |        | 2 |
| AAAC.GTTT    | 1 | 287795870 | 287795890 | 5.25    | .                  | .      | intergenic | .      | rs788440889 |        | 2 |
| AC.GT        | 1 | 288029383 | 288029392 | 5       | ENSSSCT0000006045  | PAPPA  | intron     | -0.02  | .           |        | 2 |
| AT.AT        | 1 | 288148049 | 288148058 | 5       | .                  | .      | intergenic | .      | rs786610255 |        | 2 |
| AAAAG.CTTTT  | 1 | 288494238 | 288494262 | 5       | .                  | .      | intergenic | .      | rs312169    | rs7891 | 2 |
| AT.AT        | 1 | 288530434 | 288530457 | 12      | ENSSSCT0000006050  | .      | intron     | -0.167 | rs312343    | rs7883 | 2 |
| ACGC.GCGT    | 1 | 288688171 | 288688182 | 3       | ENSSSCT0000006050  | .      | intron     | .      | rs749062    | rs6976 | 2 |
| AAAC.GTTT    | 1 | 288688537 | 288688563 | 6.75    | ENSSSCT0000006050  | .      | intron     | .      | .           |        | 2 |
| AC.GT        | 1 | 288760297 | 288760307 | 5.5     | ENSSSCT0000006050  | .      | intron     | 0.001  | rs790746535 |        | 2 |
| ACAC.GTGT    | 1 | 288807693 | 288807734 | 10.5    | ENSSSCT0000006050  | .      | intron     | 0.099  | rs793220131 |        | 2 |
| AC.GT        | 1 | 288947099 | 288947112 | 7       | .                  | .      | intergenic | 0.153  | rs710188634 |        | 2 |
| AG.CT        | 1 | 289224476 | 289224488 | 6.5     | ENSSSCT00000023014 | .      | intron     | -0.273 | rs788950590 |        | 2 |
| AG.CT        | 1 | 289368182 | 289368191 | 5       | ENSSSCT00000023014 | .      | intron     | 0.066  | rs316996    | rs7868 | 2 |
| AAG.CTT      | 1 | 289500062 | 289500078 | 5.66667 | .                  | .      | intergenic | -0.235 | rs140133    | rs7905 | 2 |
| AC.GT        | 1 | 289555814 | 289555836 | 11.5    | .                  | .      | intergenic | -0.098 | rs788481234 |        | 2 |
| ATC.GAT      | 1 | 289556037 | 289556055 | 6.33333 | .                  | .      | intergenic | -0.121 | rs786703233 |        | 2 |
| AC.GT        | 1 | 289625280 | 289625293 | 7       | .                  | .      | intergenic | 0.271  | rs786812479 |        | 2 |
| AC.GT        | 1 | 289755390 | 289755409 | 10      | .                  | .      | intergenic | 0.599  | rs790469535 |        | 3 |
| AAAC.GTTT    | 1 | 289758880 | 289758898 | 4.75    | .                  | .      | intergenic | 0.044  | rs789446321 |        | 2 |
| AAC.GTT      | 1 | 289865782 | 289865796 | 5       | .                  | .      | intergenic | .      | rs788026427 |        | 2 |
| AT.AT        | 1 | 289903713 | 289903723 | 5.5     | .                  | .      | intergenic | -0.189 | rs355432    | rs7937 | 3 |
| AAC.GTT      | 1 | 289919959 | 289919977 | 6.33333 | .                  | .      | intergenic | 0.662  | rs102767    | rs7882 | 2 |
| AT.AT        | 1 | 290032652 | 290032663 | 6       | .                  | .      | intergenic | -0.212 | rs353670    | rs7888 | 5 |
| AC.GT        | 1 | 290277736 | 290277747 | 6       | .                  | .      | intergenic | -0.171 | rs791923935 |        | 6 |
| AAAC.GTTT    | 1 | 290497811 | 290497825 | 3.75    | .                  | .      | intergenic | 0.295  | rs787120072 |        | 2 |
| AC.GT        | 1 | 290530984 | 290531009 | 13      | .                  | .      | intergenic | .      | .           |        | 4 |
| AC.GT        | 1 | 290677590 | 290677605 | 8       | .                  | .      | intergenic | 0.274  | rs791323491 |        | 2 |
| AAAAC.GTTTT  | 1 | 290728920 | 290728953 | 6.8     | .                  | .      | intergenic | .      | rs790543834 |        | 2 |
| AG.CT        | 1 | 291071081 | 291071104 | 12      | .                  | .      | intergenic | .      | rs793229422 |        | 2 |
| AT.AT        | 1 | 291125695 | 291125705 | 5.5     | .                  | .      | intergenic | -0.051 | rs789983271 |        | 2 |
| AC.GT        | 1 | 291134333 | 291134344 | 6       | .                  | .      | intergenic | .      | .           |        | 2 |
| AG.CT        | 1 | 291197612 | 291197623 | 6       | .                  | .      | intergenic | -0.052 | rs787666624 |        | 2 |
| AAAC.GTTT    | 1 | 291251807 | 291251825 | 4.75    | .                  | .      | intergenic | -0.146 | rs377804    | rs7887 | 2 |
| AAAAAC.GTTTT | 1 | 291298850 | 291298877 | 4.66667 | .                  | .      | intergenic | .      | rs341807    | rs7892 | 3 |
| AC.GT        | 1 | 291669887 | 291669900 | 7       | .                  | .      | intergenic | -0.031 | .           |        | 3 |
| AAAAC.GTTTT  | 1 | 291677942 | 291677968 | 5.4     | .                  | .      | intergenic | 0.076  | rs320638    | rs7926 | 2 |
| AGG.CCT      | 1 | 291690642 | 291690658 | 5.66667 | .                  | .      | intergenic | 0.095  | rs370044    | rs7910 | 2 |
| AAAC.GTTT    | 1 | 291718521 | 291718561 | 10.25   | .                  | .      | intergenic | -0.093 | rs345386    | rs7933 | 2 |
| AT.AT        | 1 | 291898230 | 291898244 | 7.5     | .                  | .      | intergenic | .      | rs787185369 |        | 3 |
| AC.GT        | 1 | 291967518 | 291967530 | 6.5     | .                  | .      | intergenic | 0.022  | rs787632424 |        | 2 |
| AG.CT        | 1 | 291978400 | 291978412 | 6.5     | .                  | .      | intergenic | -0.061 | rs787155767 |        | 2 |
| AATG.CATT    | 1 | 291984413 | 291984440 | 7       | .                  | .      | intergenic | -0.091 | rs398359    | rs7908 | 2 |
| AG.CT        | 1 | 291993539 | 291993551 | 6.5     | .                  | .      | intergenic | 1.286  | rs790537206 |        | 3 |
| AGG.CCT      | 1 | 292010135 | 292010165 | 10.3333 | .                  | .      | intergenic | .      | rs790249687 |        | 2 |
| AATG.CATT    | 1 | 292190872 | 292190900 | 7.25    | .                  | .      | intergenic | -0.235 | rs791571219 |        | 2 |
| AGG.CCT      | 1 | 292677756 | 292677767 | 4       | ENSSSCT00000025473 | .      | intron     | -0.293 | rs788712895 |        | 2 |
| AT.AT        | 1 | 292761509 | 292761521 | 6.5     | ENSSSCT0000006055  | MEGF9  | intron     | 0.353  | rs155830    | rs7896 | 2 |
| AG.CT        | 1 | 292777473 | 292777487 | 7.5     | ENSSSCT0000006055  | MEGF9  | intron     | 0.081  | rs321603    | rs7920 | 2 |
| AATG.CATT    | 1 | 292838423 | 292838455 | 8.25    | .                  | .      | intergenic | 0.021  | rs697109109 |        | 2 |
| AG.CT        | 1 | 292846040 | 292846049 | 5       | .                  | .      | intergenic | -0.048 | .           |        | 2 |
| AG.CT        | 1 | 292864642 | 292864652 | 5.5     | .                  | .      | intergenic | .      | .           |        | 3 |
| AAAC.GTTT    | 1 | 292953275 | 292953295 | 5.25    | ENSSSCT0000006057  | .      | intron     | 0.152  | rs787821196 |        | 2 |
| AT.AT        | 1 | 293041864 | 293041875 | 6       | ENSSSCT00000023007 | .      | intron     | 0.095  | rs39028     | rs7894 | 2 |
| AT.AT        | 1 | 293041864 | 293041875 | 6       | ENSSSCT0000006061  | .      | intron     | 0.095  | rs39028     | rs7894 | 2 |
| AAAT.ATTT    | 1 | 293337997 | 293338011 | 3.75    | .                  | .      | intergenic | 0.085  | rs790124314 |        | 3 |
| AC.GT        | 1 | 293339779 | 293339792 | 7       | .                  | .      | intergenic | 0.289  | rs793780291 |        | 2 |
| AAAAC.GTTTT  | 1 | 293392809 | 293392828 | 4       | .                  | .      | intergenic | -0.02  | .           |        | 2 |
| AAT.ATT      | 1 | 293488217 | 293488233 | 5.66667 | ENSSSCT0000006064  | RAB14  | intron     | 1.56   | rs158347    | rs7920 | 2 |
| AC.GT        | 1 | 293759147 | 293759164 | 9       | .                  | .      | intergenic | -0.149 | rs792204132 |        | 2 |
| AAAAT.ATTTT  | 1 | 294783616 | 294783635 | 4       | .                  | .      | intergenic | .      | rs166385    | rs7877 | 2 |
| AT.AT        | 1 | 294802876 | 294802889 | 7       | .                  | .      | intergenic | .      | rs152872    | rs7929 | 2 |
| AG.CT        | 1 | 295356903 | 295356915 | 6.5     | .                  | .      | intergenic | .      | rs791801771 |        | 2 |
| AT.AT        | 1 | 295500128 | 295500144 | 8.5     | .                  | .      | intergenic | .      | .           |        | 2 |
| AT.AT        | 1 | 295601010 | 295601021 | 6       | .                  | .      | intergenic | .      | .           |        | 2 |
| CAGGC.GCCTG  | 1 | 296004340 | 296004359 | 3.33333 | .                  | .      | intergenic | .      | rs711021477 |        | 2 |
| AG.CT        | 1 | 296231881 | 296231893 | 6.5     | .                  | .      | intergenic | .      | rs787907250 |        | 2 |



|             |   |           |           |         |                    |          |            |        |               |   |
|-------------|---|-----------|-----------|---------|--------------------|----------|------------|--------|---------------|---|
| AG.CT       | 1 | 296306983 | 296306993 | 5.5     | .                  | .        | intergenic | .      | rs790386439   | 3 |
| AG.CT       | 1 | 296745361 | 296745371 | 5.5     | .                  | .        | intergenic | .      | .             | 3 |
| AAC.GTT     | 1 | 296765741 | 296765761 | 7       | .                  | .        | intergenic | .      | .             | 2 |
| AC.GT       | 1 | 296808879 | 296808906 | 14      | .                  | .        | intergenic | .      | 764711 rs7934 | 2 |
| AAAC.GTTT   | 1 | 296844296 | 296844313 | 4.5     | .                  | .        | intergenic | .      | rs786528438   | 4 |
| AAAC.GTTT   | 1 | 297147722 | 297147740 | 4.75    | .                  | .        | intergenic | .      | 114732 rs7923 | 2 |
| AG.CT       | 1 | 297181655 | 297181678 | 12      | .                  | .        | intergenic | .      | rs793402115   | 3 |
| AAAAC.GTTTT | 1 | 297224903 | 297224917 | 3       | ENSSSCT00000006127 | .        | promoter   | 0.21   | rs791630919   | 2 |
| AT.AT       | 1 | 297443813 | 297443824 | 6       | ENSSSCT00000023452 | .        | promoter   | 0.114  | .             | 3 |
| AAAG.CTTT   | 1 | 297473997 | 297474021 | 6.25    | ENSSSCT00000023452 | .        | intron     | 0.172  | rs787634728   | 2 |
| AG.CT       | 1 | 297579969 | 297579991 | 11.5    | ENSSSCT00000006135 | STRBP    | intron     | 0.318  | .             | 3 |
| AC.GT       | 1 | 297604061 | 297604071 | 5.5     | ENSSSCT00000006135 | STRBP    | intron     | 0.27   | .             | 2 |
| AAC.GTT     | 1 | 297724275 | 297724294 | 6.66667 | .                  | .        | intergenic | .      | rs792626000   | 2 |
| AAAC.GTTT   | 1 | 297734558 | 297734571 | 3.5     | .                  | .        | intergenic | .      | rs790101678   | 4 |
| AGG.CCT     | 1 | 298064435 | 298064451 | 5.66667 | .                  | .        | intergenic | -0.031 | .             | 2 |
| AAT.ATT     | 1 | 298417588 | 298417600 | 4.33333 | ENSSSCT00000006139 | DENND1A  | intron     | .      | rs789979951   | 2 |
| AAAC.GTTT   | 1 | 298643920 | 298643932 | 3.25    | .                  | .        | intergenic | 0.092  | rs792727121   | 2 |
| AAAC.GTTT   | 1 | 299018728 | 299018747 | 5       | .                  | .        | intergenic | .      | 190514 rs7927 | 2 |
| AC.GT       | 1 | 299069742 | 299069770 | 14.5    | .                  | .        | intergenic | 0.232  | .             | 2 |
| AAAC.GTTT   | 1 | 299082218 | 299082244 | 6.75    | ENSSSCT00000006145 | NR6A1    | intron     | .      | .             | 2 |
| AAAC.GTTT   | 1 | 299338165 | 299338179 | 3.75    | ENSSSCT00000029437 | NR6A1    | intron     | 0.486  | 589655 rs7904 | 2 |
| AAAAC.GTTTT | 1 | 299377781 | 299377801 | 4.2     | ENSSSCT00000033935 | NR6A1    | intron     | 0.459  | rs791455385   | 2 |
| AAAAC.GTTTT | 1 | 299377781 | 299377801 | 4.2     | ENSSSCT00000029437 | NR6A1    | intron     | 0.459  | rs791455385   | 2 |
| AC.GT       | 1 | 299448983 | 299448993 | 5.5     | .                  | .        | intergenic | 0.349  | rs793150925   | 2 |
| AAAT.ATTT   | 1 | 299664011 | 299664036 | 6.5     | .                  | .        | intergenic | -0.054 | rs788479754   | 2 |
| AC.GT       | 1 | 299734059 | 299734070 | 6       | .                  | .        | intergenic | 0.25   | rs793648857   | 2 |
| AAC.GTT     | 1 | 299755357 | 299755369 | 4.33333 | ENSSSCT00000006159 | HSPA5    | intron     | 4.587  | 111438 rs7876 | 2 |
| AC.GT       | 1 | 299824668 | 299824681 | 7       | ENSSSCT00000006160 | GAPVD1   | intron     | -0.069 | rs792877127   | 4 |
| AC.GT       | 1 | 299827524 | 299827545 | 11      | ENSSSCT00000006160 | GAPVD1   | intron     | 0.042  | rs705994651   | 4 |
| AC.GT       | 1 | 299889118 | 299889132 | 7.5     | ENSSSCT00000006160 | GAPVD1   | intron     | 0.368  | rs791340267   | 4 |
| AAAAC.GTTTT | 1 | 299892976 | 299892996 | 4.2     | ENSSSCT00000006160 | GAPVD1   | intron     | 0.145  | rs791521330   | 2 |
| AAAAC.GTTTT | 1 | 299944209 | 299944233 | 4.16667 | ENSSSCT00000006160 | GAPVD1   | intron     | 0.122  | rs791040032   | 2 |
| AAAAG.CTTTT | 1 | 300171334 | 300171354 | 3.5     | ENSSSCT00000027058 | .        | intron     | 0.121  | rs786869189   | 3 |
| AAAT.ATTT   | 1 | 300178057 | 300178074 | 4.5     | ENSSSCT00000027058 | .        | promoter   | 0.232  | rs786859504   | 2 |
| AT.AT       | 1 | 300341631 | 300341642 | 6       | ENSSSCT00000006162 | PBX3     | intron     | 0.252  | 787970 rs7925 | 2 |
| AC.GT       | 1 | 300363853 | 300363869 | 8.5     | ENSSSCT00000006162 | PBX3     | intron     | 2.358  | 191117 rs7877 | 2 |
| AC.GT       | 1 | 300388316 | 300388325 | 5       | ENSSSCT00000006162 | PBX3     | intron     | 0.216  | 382310 rs7876 | 2 |
| AAAAC.GTTTT | 1 | 300808794 | 300808812 | 3.8     | .                  | .        | intergenic | 0.162  | 376713 rs7867 | 3 |
| AAAC.GTTT   | 1 | 300827048 | 300827063 | 4       | .                  | .        | intergenic | 1.472  | 369055 rs7865 | 2 |
| AG.CT       | 1 | 300873670 | 300873686 | 8.5     | .                  | .        | intergenic | .      | rs791464182   | 2 |
| AAC.GTT     | 1 | 300901071 | 300901087 | 5.66667 | .                  | .        | intergenic | -0.5   | .             | 2 |
| AT.AT       | 1 | 301017333 | 301017344 | 6       | .                  | .        | intergenic | -0.441 | rs790576264   | 4 |
| ATCC.GGAT   | 1 | 301185432 | 301185452 | 5.25    | .                  | .        | intergenic | -0.228 | rs787745189   | 2 |
| AC.GT       | 1 | 301197891 | 301197909 | 9.5     | .                  | .        | intergenic | 0.439  | rs788722446   | 2 |
| AAAAT.ATTTT | 1 | 301291059 | 301291087 | 5.8     | .                  | .        | intergenic | 0.261  | rs789161390   | 2 |
| AAGG.CCTT   | 1 | 301294104 | 301294133 | 7.5     | .                  | .        | intergenic | -0.237 | .             | 2 |
| AAAT.ATTT   | 1 | 301380062 | 301380076 | 3.75    | .                  | .        | intergenic | .      | rs793314843   | 2 |
| AAACC.GGTTT | 1 | 301691448 | 301691474 | 5.4     | .                  | .        | intergenic | 0.062  | rs789195748   | 2 |
| AAC.GTT     | 1 | 301822455 | 301822471 | 5.66667 | ENSSSCT00000006168 | .        | intron     | 1.286  | rs791456528   | 2 |
| AC.GT       | 1 | 302064138 | 302064148 | 5.5     | ENSSSCT00000006177 | STXBP1   | intron     | 0.576  | rs788473073   | 2 |
| AG.CT       | 1 | 302391661 | 302391672 | 6       | .                  | .        | intergenic | -0.008 | .             | 2 |
| AAAC.GTTT   | 1 | 302724749 | 302724766 | 4.5     | .                  | .        | intergenic | .      | rs792959720   | 2 |
| AC.GT       | 1 | 302810153 | 302810163 | 5.5     | ENSSSCT00000006207 | .        | intron     | 0.281  | rs789003993   | 2 |
| AAAT.ATTT   | 1 | 303185103 | 303185122 | 5       | ENSSSCT00000006225 | C9orf114 | promoter   | .      | rs789065348   | 2 |
| AAAC.GTTT   | 1 | 303448136 | 303448153 | 4.5     | .                  | .        | intergenic | -0.344 | rs793282743   | 2 |
| ACAG.CTGT   | 1 | 303622789 | 303622806 | 4.5     | .                  | .        | intergenic | -0.333 | rs793193415   | 2 |
| AAAT.ATTT   | 1 | 304007127 | 304007145 | 4.75    | ENSSSCT00000006256 | FNBP1    | intron     | 0.148  | rs790913661   | 2 |
| AT.AT       | 1 | 304252498 | 304252510 | 6.5     | .                  | .        | intergenic | 0.093  | rs788245287   | 3 |
| AG.CT       | 1 | 304508171 | 304508187 | 8.5     | ENSSSCT00000006270 | ASS1     | intron     | 0.048  | .             | 3 |
| ATCC.GGAT   | 1 | 304569547 | 304569588 | 10.5    | .                  | .        | intergenic | .      | 184992 rs7938 | 3 |
| AC.GT       | 1 | 304577406 | 304577440 | 17.5    | ENSSSCT00000006271 | FUBP3    | intron     | 0.222  | rs789082484   | 4 |
| AGG.CCT     | 1 | 304622235 | 304622249 | 5       | ENSSSCT00000006271 | FUBP3    | intron     | -0.633 | rs791878078   | 2 |
| AAAT.ATTT   | 1 | 304990828 | 304990845 | 4.5     | ENSSSCT00000006279 | LAMC3    | intron     | .      | rs791500988   | 2 |
| AAAT.ATTT   | 1 | 304990828 | 304990845 | 4.5     | ENSSSCT00000006282 | LAMC3    | intron     | .      | rs791500988   | 2 |
| AAAT.ATTT   | 1 | 305442780 | 305442805 | 6.5     | ENSSSCT00000006286 | POMT1    | intron     | -0.29  | rs786331726   | 2 |
| AG.CT       | 1 | 306192405 | 306192423 | 9.5     | ENSSSCT00000006294 | SETX     | intron     | .      | rs786801295   | 2 |
| AAC.GTT     | 1 | 306224057 | 306224069 | 4.33333 | ENSSSCT00000006294 | SETX     | intron     | 1.09   | rs793595646   | 2 |
| AAAAC.GTTTT | 1 | 306299923 | 306299944 | 4.4     | .                  | .        | intergenic | -0.262 | 187055 rs7889 | 2 |
| AG.CT       | 1 | 306571573 | 306571600 | 14      | .                  | .        | intergenic | 1.652  | 340137 rs7906 | 2 |
| AC.GT       | 1 | 307007849 | 307007860 | 6       | ENSSSCT00000022734 | ADAMTS13 | intron     | 1.68   | rs787239809   | 2 |
| AAAAG.CTTTT | 1 | 307280607 | 307280625 | 3.16667 | ENSSSCT00000006315 | VAV2     | intron     | 0.019  | rs786570512   | 2 |
| AC.GT       | 1 | 308233598 | 308233607 | 5       | .                  | .        | intergenic | -0.307 | .             | 2 |
| AG.CT       | 1 | 309977506 | 309977520 | 7.5     | .                  | .        | intergenic | .      | rs786517412   | 2 |
| AAAAC.GTTTT | 1 | 310072676 | 310072697 | 4.4     | ENSSSCT00000006349 | RBFA     | intron     | .      | rs793227167   | 2 |
| AAC.GTT     | 1 | 310137370 | 310137387 | 6       | ENSSSCT00000006353 | TXNL4A   | intron     | .      | rs792914287   | 2 |
| AAAT.ATTT   | 1 | 310139339 | 310139356 | 4.5     | ENSSSCT00000006353 | TXNL4A   | intron     | .      | rs791733339   | 2 |
| AG.CT       | 1 | 310833055 | 310833067 | 6.5     | .                  | .        | intergenic | .      | rs789655674   | 2 |
| AGAT.ATCT   | 1 | 310847880 | 310847891 | 3       | .                  | .        | intergenic | .      | rs792442818   | 2 |
| AAAT.ATTT   | 1 | 310858723 | 310858749 | 6.75    | .                  | .        | intergenic | .      | rs790857695   | 2 |
| AAAC.GTTT   | 1 | 311076812 | 311076842 | 7.75    | ENSSSCT00000006357 | TARSL2   | 3'utr      | 0.484  | rs695509989   | 2 |
| AC.GT       | 1 | 311142963 | 311142977 | 7.5     | .                  | .        | intergenic | .      | rs788713628   | 3 |
| AAAC.GTTT   | 1 | 311336146 | 311336174 | 7.25    | ENSSSCT00000029763 | .        | promoter   | .      | 307273 rs7929 | 2 |
| AAAG.CTTT   | 1 | 311897732 | 311897744 | 3.25    | .                  | .        | intergenic | .      | rs789177870   | 2 |
| AAT.ATT     | 1 | 311929960 | 311929988 | 9.66667 | .                  | .        | intergenic | .      | rs792376082   | 2 |

|             |    |           |           |         |                    |         |            |        |               |   |
|-------------|----|-----------|-----------|---------|--------------------|---------|------------|--------|---------------|---|
| AC.GT       | 1  | 312205548 | 312205562 | 7.5     | ENSSSCT00000006371 | OR10AG1 | promoter   | .      | rs791844213   | 2 |
| AC.GT       | 1  | 312264615 | 312264635 | 10.5    | ENSSSCT00000006373 | .       | cds        | .      | 159435 rs7931 | 2 |
| AAAAT.ATTTT | 1  | 312300085 | 312300103 | 3.8     | .                  | .       | intergenic | .      | .             | 2 |
| AAAT.ATTT   | 1  | 312333791 | 312333808 | 4.5     | .                  | .       | intergenic | .      | rs699408104   | 2 |
| AC.GT       | 1  | 312357739 | 312357750 | 6       | ENSSSCT00000006377 | .       | promoter   | -0.074 | rs793230177   | 2 |
| AT.AT       | 1  | 312361685 | 312361696 | 6       | .                  | .       | intergenic | .      | 708862 rs7895 | 2 |
| AAT.ATT     | 1  | 312607522 | 312607535 | 4.66667 | .                  | .       | intergenic | .      | rs790484225   | 2 |
| AG.CT       | 1  | 312826748 | 312826758 | 5.5     | .                  | .       | intergenic | .      | .             | 4 |
| AT.AT       | 1  | 313147182 | 313147192 | 5.5     | ENSSSCT00000006399 | .       | promoter   | .      | rs790166632   | 2 |
| AC.GT       | 1  | 313505206 | 313505224 | 9.5     | .                  | .       | intergenic | .      | rs789508903   | 3 |
| AAC.GTT     | 1  | 314849237 | 314849248 | 4       | .                  | .       | intergenic | .      | 312056 rs7900 | 3 |
| AG.CT       | 1  | 315205481 | 315205500 | 10      | .                  | .       | intergenic | .      | 543382 rs7907 | 2 |
| AAAAC.GTTTT | 1  | 315209256 | 315209277 | 4.4     | .                  | .       | intergenic | .      | rs786282086   | 2 |
| AG.CT       | 1  | 315314217 | 315314240 | 12      | .                  | .       | intergenic | .      | .             | 3 |
| AAAT.ATTT   | 10 | 45277     | 45300     | 6       | .                  | .       | intergenic | .      | rs792373976   | 2 |
| AAAC.GTTT   | 10 | 51881     | 51903     | 5.75    | ENSSSCT00000011811 | NDUFAB1 | intron     | 0.098  | rs791455171   | 2 |
| AAAAC.GTTTT | 10 | 74596     | 74618     | 4.6     | ENSSSCT00000011812 | UBFD1   | 3'utr      | 4.025  | rs786218814   | 2 |
| AAAC.GTTT   | 10 | 183123    | 183135    | 3.25    | ENSSSCT00000011815 | COG7    | intron     | .      | rs786755422   | 2 |
| AAAG.CTTT   | 10 | 208539    | 208557    | 4.75    | ENSSSCT00000011815 | COG7    | intron     | .      | rs789022093   | 2 |
| AC.GT       | 10 | 518496    | 518526    | 15.5    | .                  | .       | intergenic | .      | 144473 rs7891 | 4 |
| AC.GT       | 10 | 579486    | 579496    | 5.5     | .                  | .       | intergenic | .      | rs786886041   | 4 |
| AC.GT       | 10 | 861830    | 861843    | 7       | .                  | .       | intergenic | .      | .             | 2 |
| AAAAC.GTTTT | 10 | 862125    | 862144    | 4       | .                  | .       | intergenic | .      | 217621 rs7911 | 3 |
| ACAT.ATGT   | 10 | 876903    | 876914    | 3       | .                  | .       | intergenic | 0.004  | .             | 3 |
| AAAT.ATTT   | 10 | 879528    | 879552    | 6.25    | .                  | .       | intergenic | .      | rs791031652   | 2 |
| AAC.GTT     | 10 | 926935    | 926950    | 5.33333 | .                  | .       | intergenic | -0.153 | rs791386715   | 2 |
| AAAC.GTTT   | 10 | 1096889   | 1096907   | 4.75    | .                  | .       | intergenic | .      | 310257 rs7928 | 2 |
| AT.AT       | 10 | 1675392   | 1675405   | 7       | .                  | .       | intergenic | 0.051  | rs788357198   | 4 |
| AAAT.ATTT   | 10 | 1701587   | 1701603   | 4.25    | .                  | .       | intergenic | -0.233 | rs789265533   | 2 |
| AT.AT       | 10 | 1721260   | 1721283   | 12      | .                  | .       | intergenic | -0.086 | .             | 4 |
| AT.AT       | 10 | 2091846   | 2091858   | 6.5     | .                  | .       | intergenic | .      | rs790664076   | 2 |
| AAAAG.CTTTT | 10 | 2158501   | 2158534   | 5.66667 | .                  | .       | intergenic | 0.169  | rs787548172   | 2 |
| AAAC.GTTT   | 10 | 2311719   | 2311730   | 3       | .                  | .       | intergenic | 0.116  | rs790076880   | 2 |
| AG.CT       | 10 | 2401047   | 2401059   | 6.5     | ENSSSCT00000011818 | .       | intron     | 0.259  | .             | 3 |
| AG.CT       | 10 | 2487658   | 2487670   | 6.5     | .                  | .       | intergenic | .      | rs787028695   | 2 |
| AAAC.GTTT   | 10 | 2690250   | 2690272   | 5.75    | .                  | .       | intergenic | -0.158 | rs789099648   | 4 |
| AAG.CTT     | 10 | 2783087   | 2783101   | 5       | .                  | .       | intergenic | .      | rs792532332   | 2 |
| AAC.GTT     | 10 | 2827044   | 2827057   | 4.66667 | .                  | .       | intergenic | -0.141 | rs790105288   | 2 |
| AC.GT       | 10 | 3276260   | 3276282   | 11.5    | .                  | .       | intergenic | -0.222 | rs788196815   | 3 |
| AAAT.ATTT   | 10 | 3551073   | 3551096   | 6       | .                  | .       | intergenic | -0.057 | 386692 rs6958 | 2 |
| AAAC.GTTT   | 10 | 3773778   | 3773795   | 4.5     | .                  | .       | intergenic | .      | rs790238737   | 2 |
| AAGG.CCTT   | 10 | 3830249   | 3830277   | 7.25    | .                  | .       | intergenic | 0.06   | .             | 2 |
| AAC.GTT     | 10 | 3950750   | 3950768   | 6.33333 | .                  | .       | intergenic | -0.328 | rs786477753   | 2 |
| AT.AT       | 10 | 4026232   | 4026241   | 5       | .                  | .       | intergenic | 0.166  | rs789575508   | 2 |
| AAAC.GTTT   | 10 | 4184355   | 4184369   | 3.75    | .                  | .       | intergenic | 0.086  | rs786741293   | 2 |
| AT.AT       | 10 | 4257892   | 4257906   | 7.5     | .                  | .       | intergenic | .      | rs793079454   | 3 |
| AAAC.GTTT   | 10 | 4362296   | 4362308   | 3.25    | .                  | .       | intergenic | .      | rs787121554   | 2 |
| AC.GT       | 10 | 4911952   | 4911966   | 7.5     | .                  | .       | intergenic | .      | rs790773764   | 4 |
| AG.CT       | 10 | 4929648   | 4929659   | 6       | .                  | .       | intergenic | 0.327  | rs789468717   | 3 |
| ACT.AGT     | 10 | 4933803   | 4933819   | 5.66667 | .                  | .       | intergenic | -0.167 | .             | 2 |
| AGG.CCT     | 10 | 4933852   | 4933871   | 6.66667 | .                  | .       | intergenic | -0.207 | .             | 2 |
| AC.GT       | 10 | 5108443   | 5108456   | 7       | ENSSSCT00000011825 | BRINP3  | intron     | -0.107 | 202663 rs7869 | 2 |
| ACAT.ATGT   | 10 | 5132219   | 5132237   | 4.75    | ENSSSCT00000011825 | BRINP3  | intron     | 0      | rs793420717   | 2 |
| AAAC.GTTT   | 10 | 5181949   | 5181970   | 5.5     | ENSSSCT00000011825 | BRINP3  | intron     | 0.335  | 306470 rs7931 | 2 |
| AC.GT       | 10 | 5204906   | 5204931   | 13      | .                  | .       | intergenic | -0.162 | rs787420647   | 2 |
| AC.GT       | 10 | 5410462   | 5410474   | 6.5     | .                  | .       | intergenic | -0.099 | 350471 rs7892 | 2 |
| AT.AT       | 10 | 5838717   | 5838726   | 5       | .                  | .       | intergenic | -0.207 | .             | 2 |
| AAAC.GTTT   | 10 | 5868245   | 5868260   | 4       | .                  | .       | intergenic | -0.081 | 329724 rs7920 | 2 |
| AAC.GTT     | 10 | 5874152   | 5874171   | 6.66667 | .                  | .       | intergenic | -0.139 | rs791540704   | 2 |
| ACAT.ATGT   | 10 | 6012990   | 6013009   | 5       | .                  | .       | intergenic | -0.136 | .             | 3 |
| AAC.GTT     | 10 | 6035977   | 6035993   | 5.66667 | .                  | .       | intergenic | -0.079 | 102995 rs7928 | 2 |
| AAG.CTT     | 10 | 6051977   | 6051989   | 4.33333 | .                  | .       | intergenic | 0.223  | 315745 rs7888 | 2 |
| AG.CT       | 10 | 6282297   | 6282331   | 17.5    | .                  | .       | intergenic | -0.107 | 340880 rs7874 | 2 |
| AC.GT       | 10 | 6388369   | 6388379   | 5.5     | .                  | .       | intergenic | -0.175 | rs787569450   | 2 |
| AAAAC.GTTTT | 10 | 7032655   | 7032673   | 3.8     | .                  | .       | intergenic | -0.088 | rs791859959   | 2 |
| AAC.GTT     | 10 | 7033545   | 7033561   | 5.66667 | .                  | .       | intergenic | -0.192 | .             | 3 |
| AC.GT       | 10 | 7118711   | 7118720   | 5       | .                  | .       | intergenic | .      | .             | 2 |
| AG.CT       | 10 | 7145045   | 7145059   | 7.5     | .                  | .       | intergenic | 0.036  | 350539 rs7913 | 2 |
| AGG.CCT     | 10 | 7178559   | 7178572   | 4.66667 | .                  | .       | intergenic | -0.125 | 367829 rs7095 | 2 |
| AAAC.GTTT   | 10 | 7263139   | 7263161   | 5.75    | .                  | .       | intergenic | -0.009 | rs792531132   | 2 |
| AT.AT       | 10 | 7278949   | 7278966   | 9       | .                  | .       | intergenic | .      | .             | 2 |
| AAC.GTT     | 10 | 7300614   | 7300628   | 5       | .                  | .       | intergenic | -0.185 | rs791188810   | 3 |
| AATC.GATT   | 10 | 7320196   | 7320207   | 3       | .                  | .       | intergenic | -0.163 | rs790170023   | 2 |
| AAAC.GTTT   | 10 | 7593401   | 7593416   | 4       | .                  | .       | intergenic | .      | rs790557827   | 2 |
| AC.GT       | 10 | 7878020   | 7878032   | 6.5     | .                  | .       | intergenic | 0.297  | rs792715015   | 2 |
| AG.CT       | 10 | 7888261   | 7888275   | 7.5     | .                  | .       | intergenic | 0.043  | rs790813199   | 2 |
| AAC.GTT     | 10 | 8012796   | 8012819   | 8       | .                  | .       | intergenic | .      | 203712 rs7909 | 4 |
| AATG.CATT   | 10 | 8199005   | 8199032   | 7       | .                  | .       | intergenic | -0.049 | 352233 rs7908 | 2 |
| AAAC.GTTT   | 10 | 8317091   | 8317109   | 4.75    | .                  | .       | intergenic | -0.238 | rs790050469   | 2 |
| AAAAC.GTTTT | 10 | 8407285   | 8407300   | 3.2     | .                  | .       | intergenic | .      | 197562 rs7890 | 2 |
| AC.GT       | 10 | 8465879   | 8465890   | 6       | .                  | .       | intergenic | .      | .             | 2 |
| AAAAT.ATTTT | 10 | 8577080   | 8577103   | 4.8     | .                  | .       | intergenic | -0.146 | rs791053155   | 2 |
| AAAAC.GTTTT | 10 | 8652363   | 8652387   | 5       | ENSSSCT00000011830 | ESRRG   | intron     | 0.125  | rs790156236   | 2 |
| AC.GT       | 10 | 8783517   | 8783528   | 6       | ENSSSCT00000011830 | ESRRG   | intron     | 0.063  | rs787869528   | 2 |

|             |    |          |          |         |                    |          |            |        |               |   |
|-------------|----|----------|----------|---------|--------------------|----------|------------|--------|---------------|---|
| AAT.ATT     | 10 | 8811335  | 8811349  | 5       | ENSSSCT00000011830 | ESRRG    | intron     | -0.026 | rs707590475   | 2 |
| AAAT.ATTT   | 10 | 8885213  | 8885232  | 5       | .                  | .        | intergenic | -0.18  | rs790819958   | 2 |
| AC.GT       | 10 | 8947357  | 8947369  | 6.5     | .                  | .        | intergenic | 0.991  | 371854 rs7911 | 2 |
| AGAT.ATCT   | 10 | 9090155  | 9090176  | 5.5     | .                  | .        | intergenic | -0.118 | 374061 rs7911 | 4 |
| AT.AT       | 10 | 9093616  | 9093637  | 11      | .                  | .        | intergenic | 0.249  | rs788783901   | 4 |
| AAGG.CCTT   | 10 | 9155413  | 9155426  | 3.5     | .                  | .        | intergenic | -0.33  | .             | 4 |
| AG.CT       | 10 | 9295064  | 9295076  | 6.5     | .                  | .        | intergenic | -0.342 | rs786767916   | 2 |
| AG.CT       | 10 | 9361545  | 9361554  | 5       | .                  | .        | intergenic | -0.101 | .             | 2 |
| AT.AT       | 10 | 9374394  | 9374406  | 6.5     | .                  | .        | intergenic | 0.083  | rs788304655   | 3 |
| AG.CT       | 10 | 9412632  | 9412642  | 5.5     | .                  | .        | intergenic | -0.2   | rs791458282   | 2 |
| AAT.ATT     | 10 | 9443807  | 9443823  | 5.66667 | .                  | .        | intergenic | 0.042  | 349376 rs7873 | 2 |
| ACC.GGT     | 10 | 9530761  | 9530785  | 8.33333 | .                  | .        | intergenic | 0.069  | 368934 rs7889 | 2 |
| AATG.CATT   | 10 | 9711455  | 9711481  | 6.75    | ENSSSCT00000025633 | GPATCH2  | intron     | 0.652  | rs789479694   | 2 |
| AT.AT       | 10 | 9725585  | 9725594  | 5       | ENSSSCT00000025633 | GPATCH2  | intron     | -0.036 | .             | 2 |
| AT.AT       | 10 | 9733545  | 9733555  | 5.5     | ENSSSCT00000025633 | GPATCH2  | intron     | 1.214  | rs793307899   | 2 |
| AC.GT       | 10 | 9772882  | 9772902  | 10.5    | ENSSSCT00000025633 | GPATCH2  | intron     | -0.225 | rs786323567   | 3 |
| AG.CT       | 10 | 9892614  | 9892627  | 7       | ENSSSCT00000026746 | SPATA17  | intron     | 0.146  | rs792441139   | 2 |
| AT.AT       | 10 | 9955964  | 9955988  | 12.5    | ENSSSCT00000026746 | SPATA17  | intron     | -0.136 | .             | 2 |
| AAAG.CTTT   | 10 | 10005953 | 10005969 | 4.25    | .                  | .        | intergenic | 1.408  | .             | 2 |
| AAAAC.GTTTT | 10 | 10027488 | 10027504 | 3.4     | .                  | .        | intergenic | .      | rs792739626   | 2 |
| AG.CT       | 10 | 10132674 | 10132684 | 5.5     | .                  | .        | intergenic | -0.063 | .             | 2 |
| AC.GT       | 10 | 10143409 | 10143425 | 8.5     | .                  | .        | intergenic | .      | rs793105625   | 5 |
| AAAAC.GTTTT | 10 | 10249604 | 10249625 | 4.4     | .                  | .        | intergenic | .      | rs793627903   | 3 |
| AC.GT       | 10 | 10419206 | 10419217 | 6       | ENSSSCT00000011833 | TGFB2    | intron     | -0.281 | rs789976916   | 3 |
| AAC.GTT     | 10 | 10578024 | 10578040 | 5.66667 | .                  | .        | intergenic | 0.688  | rs789938844   | 2 |
| AC.GT       | 10 | 10636105 | 10636115 | 5.5     | .                  | .        | intergenic | -0.202 | rs695037902   | 3 |
| AAAC.GTTT   | 10 | 10702368 | 10702382 | 3.75    | .                  | .        | intergenic | .      | rs793265678   | 2 |
| AAAC.GTTT   | 10 | 10982823 | 10982841 | 4.75    | .                  | .        | intergenic | -0.024 | rs793031380   | 2 |
| AAAC.GTTT   | 10 | 11121634 | 11121653 | 5       | .                  | .        | intergenic | .      | rs791078934   | 2 |
| AG.CT       | 10 | 11232724 | 11232734 | 5.5     | .                  | .        | intergenic | 0.103  | 373643 rs7925 | 3 |
| AAG.CTT     | 10 | 11448812 | 11448825 | 4.66667 | .                  | .        | intergenic | -0.053 | rs790299823   | 2 |
| AAC.GTT     | 10 | 11466193 | 11466204 | 4       | .                  | .        | intergenic | 0.009  | rs791721078   | 2 |
| AC.GT       | 10 | 11512468 | 11512480 | 6.5     | .                  | .        | intergenic | 0.248  | .             | 4 |
| AAC.GTT     | 10 | 11546640 | 11546658 | 6.33333 | .                  | .        | intergenic | -0.036 | rs791811106   | 2 |
| AAAAG.CTTTT | 10 | 11982895 | 11982916 | 4.4     | .                  | .        | intergenic | -0.13  | rs792026381   | 2 |
| AAAAC.GTTTT | 10 | 12000598 | 12000613 | 3.2     | .                  | .        | intergenic | 0.213  | .             | 2 |
| AAAT.ATTT   | 10 | 12115803 | 12115821 | 4.75    | .                  | .        | intergenic | .      | 320260 rs7864 | 2 |
| AAAAC.GTTTT | 10 | 12291980 | 12292002 | 4.6     | ENSSSCT00000011847 | 1-Mar    | intron     | .      | rs789563382   | 3 |
| AC.GT       | 10 | 12499149 | 12499180 | 16      | .                  | .        | intergenic | -0.23  | rs789824821   | 4 |
| AAAC.GTTT   | 10 | 12747432 | 12747446 | 3.75    | .                  | .        | intergenic | -0.165 | 345240 rs7892 | 2 |
| AAAAT.ATTTT | 10 | 12931770 | 12931792 | 4.6     | .                  | .        | intergenic | -0.159 | rs790836235   | 2 |
| AAAC.GTTT   | 10 | 13043059 | 13043073 | 3.75    | .                  | .        | intergenic | -0.109 | rs787538384   | 2 |
| AGC.GCT     | 10 | 13050995 | 13051008 | 4.66667 | .                  | .        | intergenic | .      | rs789025652   | 2 |
| AAAG.CTTT   | 10 | 13110005 | 13110020 | 4       | .                  | .        | intergenic | -0.009 | 342582 rs7928 | 2 |
| AC.GT       | 10 | 13157205 | 13157215 | 5.5     | .                  | .        | intergenic | -0.203 | .             | 2 |
| AC.GT       | 10 | 13214057 | 13214071 | 7.5     | .                  | .        | intergenic | 0.093  | 399172 rs7929 | 2 |
| AG.CT       | 10 | 13231867 | 13231878 | 6       | .                  | .        | intergenic | -0.081 | .             | 2 |
| AC.GT       | 10 | 13259906 | 13259917 | 6       | .                  | .        | intergenic | -0.032 | .             | 4 |
| AAAC.GTTT   | 10 | 13267265 | 13267292 | 7       | .                  | .        | intergenic | 0.874  | 715607 rs7894 | 2 |
| AAAC.GTTT   | 10 | 13324777 | 13324797 | 5.25    | .                  | .        | intergenic | -0.008 | rs787490101   | 2 |
| AC.GT       | 10 | 13365961 | 13365975 | 7.5     | .                  | .        | intergenic | .      | 331426 rs6945 | 2 |
| AAAAC.GTTTT | 10 | 13400645 | 13400669 | 5       | .                  | .        | intergenic | .      | 331210 rs7910 | 2 |
| AT.AT       | 10 | 13616368 | 13616379 | 6       | ENSSSCT00000011854 | AIDA     | intron     | 0.053  | rs793846089   | 2 |
| AGAT.ATCT   | 10 | 13655956 | 13655969 | 3.5     | .                  | .        | intergenic | 0.153  | .             | 2 |
| AAAT.ATTT   | 10 | 13660845 | 13660859 | 3.75    | .                  | .        | intergenic | 0.194  | rs786287104   | 2 |
| AAAAT.ATTTT | 10 | 14020510 | 14020538 | 5.8     | ENSSSCT00000011858 | .        | intron     | 0.374  | 799700 rs7874 | 2 |
| AATG.CATT   | 10 | 14751923 | 14751941 | 4.75    | .                  | .        | intergenic | -0.113 | rs786703479   | 2 |
| AAAC.GTTT   | 10 | 14963667 | 14963693 | 6.75    | ENSSSCT00000029068 | ZNF596   | intron     | 0.159  | rs793337367   | 2 |
| AAAC.GTTT   | 10 | 14980771 | 14980793 | 5.75    | .                  | .        | intergenic | .      | rs793834344   | 2 |
| AT.AT       | 10 | 14987802 | 14987813 | 6       | .                  | .        | intergenic | .      | 384828 rs7901 | 3 |
| AAAT.ATTT   | 10 | 15045968 | 15045990 | 5.75    | ENSSSCT00000025010 | DEGS1    | intron     | -0.069 | 381344 rs7885 | 2 |
| AC.GT       | 10 | 15142079 | 15142090 | 6       | ENSSSCT00000011871 | WDR26    | intron     | -0.265 | 340518 rs7873 | 2 |
| AAT.ATT     | 10 | 15164865 | 15164881 | 5.66667 | ENSSSCT00000011871 | WDR26    | intron     | 0.314  | rs789333623   | 2 |
| AAC.GTT     | 10 | 15169584 | 15169598 | 5       | ENSSSCT00000011871 | WDR26    | intron     | 0.049  | 194882 rs7926 | 3 |
| AAAAC.GTTTT | 10 | 15207380 | 15207404 | 5       | .                  | .        | intergenic | 0.036  | rs692419319   | 2 |
| AAAAT.ATTTT | 10 | 15314950 | 15314967 | 3.6     | ENSSSCT00000027767 | CNIH3    | intron     | 0.015  | rs712705666   | 2 |
| AAC.GTT     | 10 | 15319411 | 15319424 | 4.66667 | ENSSSCT00000027767 | CNIH3    | intron     | 0.142  | rs787654037   | 2 |
| AG.CT       | 10 | 15633769 | 15633783 | 7.5     | ENSSSCT00000024654 | .        | intron     | 0.275  | .             | 2 |
| AAC.GTT     | 10 | 15656879 | 15656895 | 5.66667 | ENSSSCT00000024654 | .        | intron     | .      | 316037 rs7909 | 2 |
| AT.AT       | 10 | 15707441 | 15707451 | 5.5     | ENSSSCT00000029429 | .        | intron     | 0.201  | rs789508405   | 2 |
| AAAT.ATTT   | 10 | 15899251 | 15899265 | 3.75    | ENSSSCT00000011880 | SDE2     | intron     | 0.014  | 330922 rs7905 | 2 |
| AAAT.ATTT   | 10 | 15964402 | 15964426 | 6.25    | .                  | .        | intergenic | .      | 343949 rs7886 | 3 |
| AAAC.GTTT   | 10 | 16207111 | 16207125 | 3.75    | .                  | .        | intergenic | 0.025  | .             | 2 |
| AAAC.GTTT   | 10 | 16403436 | 16403450 | 3.75    | .                  | .        | intergenic | .      | .             | 2 |
| AAT.ATT     | 10 | 16516611 | 16516630 | 6.66667 | .                  | .        | intergenic | .      | rs793058454   | 2 |
| AC.GT       | 10 | 16762421 | 16762461 | 20.5    | ENSSSCT00000028613 | ITPKB    | intron     | -0.225 | rs788617966   | 2 |
| AAAC.GTTT   | 10 | 16828804 | 16828826 | 5.75    | .                  | .        | intergenic | 0.463  | rs790876086   | 2 |
| AG.CT       | 10 | 16851009 | 16851022 | 7       | .                  | .        | intergenic | .      | .             | 4 |
| AAC.GTT     | 10 | 16991445 | 16991458 | 4.66667 | ENSSSCT00000011884 | CDC42BPA | intron     | 1.345  | rs696314909   | 2 |
| AC.GT       | 10 | 17766994 | 17767004 | 5.5     | ENSSSCT00000011891 | PLD5     | intron     | 0.043  | 385695 rs7055 | 3 |
| AAAC.GTTT   | 10 | 17846363 | 17846377 | 3.75    | .                  | .        | intergenic | 0.219  | rs790619580   | 2 |
| AC.GT       | 10 | 17970243 | 17970256 | 7       | ENSSSCT00000011894 | AKT3     | intron     | 0.007  | rs787597184   | 2 |
| AC.GT       | 10 | 18017369 | 18017379 | 5.5     | ENSSSCT00000011894 | AKT3     | intron     | 0.112  | .             | 2 |
| AAAG.CTTT   | 10 | 18343206 | 18343224 | 4.75    | ENSSSCT00000028157 | .        | intron     | .      | 350219 rs7866 | 2 |

|               |    |          |          |         |                    |         |            |        |               |   |
|---------------|----|----------|----------|---------|--------------------|---------|------------|--------|---------------|---|
| AC.GT         | 10 | 19030750 | 19030775 | 13      | .                  | .       | intergenic | 0.082  | .             | 3 |
| AAAAC.GTTTT   | 10 | 19060492 | 19060514 | 4.6     | .                  | .       | intergenic | .      | rs792851272   | 2 |
| AC.GT         | 10 | 19083231 | 19083262 | 16      | .                  | .       | intergenic | .      | .             | 3 |
| AC.GT         | 10 | 19113272 | 19113284 | 6.5     | .                  | .       | intergenic | -0.33  | rs787023993   | 2 |
| AAT.ATT       | 10 | 19285308 | 19285328 | 7       | .                  | .       | intergenic | 0.658  | .             | 2 |
| AAGAG.CTCTT   | 10 | 19290095 | 19290127 | 6.6     | .                  | .       | intergenic | 0.012  | 266415 rs7899 | 2 |
| AAC.GTT       | 10 | 19494059 | 19494079 | 7       | .                  | .       | intergenic | -0.072 | rs791604414   | 2 |
| AAAC.GTTT     | 10 | 19721761 | 19721795 | 8.75    | ENSSSCT00000011898 | DESI2   | intron     | 0.286  | rs789435300   | 2 |
| AAAT.ATTT     | 10 | 19839670 | 19839682 | 3.25    | .                  | .       | intergenic | -0.125 | .             | 2 |
| AAAT.ATTT     | 10 | 20147358 | 20147377 | 5       | .                  | .       | intergenic | 0.005  | rs691945452   | 2 |
| AAAAAT.ATTTTT | 10 | 20344443 | 20344461 | 3.16667 | .                  | .       | intergenic | -0.252 | rs787630331   | 2 |
| AC.GT         | 10 | 20382343 | 20382354 | 6       | .                  | .       | intergenic | 0.001  | rs792471802   | 3 |
| AAAC.GTTT     | 10 | 20415968 | 20415987 | 5       | ENSSSCT00000011902 | KIF26B  | intron     | 0.036  | rs787097923   | 2 |
| AAAC.GTTT     | 10 | 20415968 | 20415987 | 5       | ENSSSCT00000026658 | KIF26B  | intron     | 0.036  | rs787097923   | 2 |
| AAAG.CTTT     | 10 | 20633614 | 20633629 | 4       | ENSSSCT00000011902 | KIF26B  | intron     | 0.251  | rs790802809   | 2 |
| AAAG.CTTT     | 10 | 20633614 | 20633629 | 4       | ENSSSCT00000026658 | KIF26B  | intron     | 0.251  | rs790802809   | 2 |
| AAAG.CTTT     | 10 | 20633614 | 20633629 | 4       | ENSSSCT00000022970 | .       | promoter   | 0.251  | rs790802809   | 2 |
| AG.CT         | 10 | 20846287 | 20846308 | 11      | .                  | .       | intergenic | 0.475  | .             | 2 |
| AAC.GTT       | 10 | 21128379 | 21128391 | 4.33333 | .                  | .       | intergenic | .      | rs790180302   | 2 |
| AG.CT         | 10 | 21320237 | 21320248 | 6       | .                  | .       | intergenic | .      | rs791021197   | 2 |
| AG.CT         | 10 | 21478014 | 21478026 | 6.5     | ENSSSCT00000032587 | .       | intron     | .      | rs789416626   | 2 |
| AC.GT         | 10 | 21544872 | 21544884 | 6.5     | ENSSSCT00000032587 | .       | intron     | .      | .             | 2 |
| AG.CT         | 10 | 21660657 | 21660668 | 6       | ENSSSCT00000011908 | .       | intron     | .      | rs790051654   | 2 |
| AG.CT         | 10 | 21660657 | 21660668 | 6       | ENSSSCT00000025284 | .       | intron     | .      | rs790051654   | 2 |
| AAAC.GTTT     | 10 | 21805698 | 21805716 | 4.75    | .                  | .       | intergenic | .      | rs791237464   | 3 |
| AAC.GTT       | 10 | 21830700 | 21830719 | 6.66667 | .                  | .       | intergenic | 0.104  | rs791240903   | 2 |
| AG.CT         | 10 | 22046115 | 22046128 | 7       | ENSSSCT00000011910 | .       | intron     | 0.296  | .             | 4 |
| ACAG.CTGT     | 10 | 22056932 | 22056947 | 4       | .                  | .       | intergenic | -0.16  | .             | 2 |
| AT.AT         | 10 | 22076577 | 22076597 | 10.5    | .                  | .       | intergenic | 0.037  | .             | 2 |
| AC.GT         | 10 | 23483977 | 23483989 | 6.5     | .                  | .       | intergenic | .      | rs789506852   | 2 |
| AC.GT         | 10 | 23563738 | 23563748 | 5.5     | .                  | .       | intergenic | .      | .             | 2 |
| AAAAT.ATTTT   | 10 | 23575950 | 23575965 | 3.2     | .                  | .       | intergenic | 0.064  | rs787339688   | 2 |
| AT.AT         | 10 | 23680614 | 23680627 | 7       | .                  | .       | intergenic | 0.02   | 332796 rs7913 | 2 |
| AT.AT         | 10 | 23688141 | 23688151 | 5.5     | .                  | .       | intergenic | .      | rs791323503   | 2 |
| AAAAT.ATTTT   | 10 | 24103504 | 24103521 | 3.6     | .                  | .       | intergenic | -0.096 | rs790065989   | 2 |
| AC.GT         | 10 | 24481188 | 24481198 | 5.5     | ENSSSCT00000011919 | TP53BP2 | intron     | -0.466 | rs788311382   | 3 |
| AC.GT         | 10 | 24743814 | 24743825 | 6       | .                  | .       | intergenic | 0.286  | rs791515574   | 2 |
| AAAT.ATTT     | 10 | 24954372 | 24954388 | 4.25    | .                  | .       | intergenic | .      | rs791153079   | 2 |
| AAAT.ATTT     | 10 | 25205779 | 25205811 | 8.25    | .                  | .       | intergenic | -0.007 | rs787858034   | 2 |
| AAGG.CCTT     | 10 | 25413041 | 25413074 | 8.5     | .                  | .       | intergenic | 0.399  | rs790980759   | 2 |
| AAAG.CTTT     | 10 | 25473766 | 25473780 | 3.75    | .                  | .       | intergenic | 0.006  | 356464 rs7898 | 2 |
| AAATT.AATTT   | 10 | 25715672 | 25715708 | 7.4     | ENSSSCT00000011931 | NEK7    | intron     | .      | 150971 rs7892 | 2 |
| AC.GT         | 10 | 25813640 | 25813652 | 6.5     | .                  | .       | intergenic | .      | rs786834065   | 2 |
| AT.AT         | 10 | 25878822 | 25878834 | 6.5     | .                  | .       | intergenic | 0.022  | 355283 rs7883 | 3 |
| AAC.GTT       | 10 | 25888851 | 25888868 | 6       | .                  | .       | intergenic | .      | 187122 rs7876 | 2 |
| AC.GT         | 10 | 25969868 | 25969884 | 8.5     | .                  | .       | intergenic | 0.009  | rs793233399   | 2 |
| AAAAC.GTTTT   | 10 | 26423656 | 26423679 | 4.8     | .                  | .       | intergenic | -0.078 | rs791824894   | 2 |
| ACCT.AGGT     | 10 | 26454479 | 26454493 | 3.75    | .                  | .       | intergenic | -0.127 | .             | 2 |
| AGG.CCT       | 10 | 26572109 | 26572120 | 4       | .                  | .       | intergenic | -0.208 | rs790749820   | 2 |
| AC.GT         | 10 | 26684828 | 26684849 | 11      | .                  | .       | intergenic | -0.137 | 397436 rs7905 | 2 |
| AG.CT         | 10 | 26729457 | 26729470 | 7       | .                  | .       | intergenic | 0.05   | 348074 rs7906 | 2 |
| AAAAG.CTTTT   | 10 | 26732812 | 26732829 | 3.6     | .                  | .       | intergenic | -0.163 | rs792222761   | 2 |
| AAT.ATT       | 10 | 26757359 | 26757372 | 4.66667 | .                  | .       | intergenic | -0.002 | 189779 rs7884 | 2 |
| AT.AT         | 10 | 26827090 | 26827100 | 5.5     | .                  | .       | intergenic | 0.227  | rs787308746   | 2 |
| AC.GT         | 10 | 26957983 | 26957994 | 6       | .                  | .       | intergenic | .      | rs790813389   | 2 |
| AAAAAG.CTTTT  | 10 | 27078634 | 27078651 | 3       | .                  | .       | intergenic | .      | rs786428495   | 2 |
| AAAC.GTTT     | 10 | 27087987 | 27088001 | 3.75    | .                  | .       | intergenic | .      | rs787513680   | 2 |
| AAAAC.GTTTT   | 10 | 27104376 | 27104393 | 3.6     | .                  | .       | intergenic | 0.175  | .             | 2 |
| AAAT.ATTT     | 10 | 27320475 | 27320497 | 5.75    | ENSSSCT00000026077 | NR5A2   | intron     | -0.174 | rs788467062   | 2 |
| AAAC.GTTT     | 10 | 27546613 | 27546628 | 4       | .                  | .       | intergenic | 0.318  | rs792056328   | 2 |
| AAAAAC.GTTTT  | 10 | 27732636 | 27732658 | 3.83333 | .                  | .       | intergenic | 0.006  | rs789571944   | 2 |
| AAAC.GTTT     | 10 | 27747018 | 27747040 | 5.75    | ENSSSCT00000030669 | CAMSAP2 | 3'utr      | 1.108  | rs786717134   | 2 |
| AAAG.CTTT     | 10 | 27748502 | 27748520 | 4.75    | ENSSSCT00000030669 | CAMSAP2 | intron     | 3.734  | 104251 rs7899 | 2 |
| AAAC.GTTT     | 10 | 27750930 | 27750944 | 3.75    | ENSSSCT00000030669 | CAMSAP2 | intron     | -0.141 | rs792312322   | 2 |
| AC.GT         | 10 | 28451562 | 28451578 | 8.5     | .                  | .       | intergenic | -0.28  | .             | 2 |
| AAT.ATT       | 10 | 28606450 | 28606464 | 5       | ENSSSCT00000026899 | IPO9    | intron     | 0.116  | rs791878670   | 2 |
| AAAC.GTTT     | 10 | 28852543 | 28852561 | 4.75    | ENSSSCT00000011955 | UBE2T   | intron     | 1.786  | rs786396032   | 3 |
| AC.GT         | 10 | 29093010 | 29093038 | 14.5    | ENSSSCT00000011958 | SYT2    | intron     | -0.495 | rs791399731   | 2 |
| GGGC.CCCCC    | 10 | 29170931 | 29170951 | 3.5     | .                  | .       | intergenic | -0.284 | 374407 rs7922 | 2 |
| AAAAC.GTTTT   | 10 | 29196193 | 29196210 | 3.6     | .                  | .       | intergenic | .      | rs788005751   | 2 |
| AAAAG.CTTTT   | 10 | 29359330 | 29359348 | 3.8     | ENSSSCT00000011960 | .       | intron     | .      | rs793228739   | 2 |
| AAC.GTT       | 10 | 29574906 | 29574920 | 5       | ENSSSCT00000030381 | CDC14B  | intron     | .      | 352026 rs7874 | 2 |
| AAG.CTT       | 10 | 29816101 | 29816112 | 4       | .                  | .       | intergenic | .      | .             | 2 |
| AAAC.GTTT     | 10 | 29944023 | 29944041 | 4.75    | .                  | .       | intergenic | .      | 173428 rs7879 | 2 |
| AT.AT         | 10 | 30009603 | 30009615 | 6.5     | ENSSSCT00000011969 | HSD17B3 | intron     | 0.166  | rs791408508   | 3 |
| ATGAT.ATCAT   | 10 | 30130645 | 30130674 | 5       | ENSSSCT00000011969 | HSD17B3 | intron     | 0.111  | .             | 2 |
| AC.GT         | 10 | 30154518 | 30154542 | 12.5    | ENSSSCT00000011969 | HSD17B3 | intron     | -0.064 | 270812 rs7865 | 4 |
| AC.GT         | 10 | 30235194 | 30235205 | 6       | .                  | .       | intergenic | 0.717  | rs792392932   | 2 |
| AAC.GTT       | 10 | 30346780 | 30346793 | 4.66667 | .                  | .       | intergenic | 0.138  | rs790472787   | 2 |
| AAC.GTT       | 10 | 30392044 | 30392055 | 4       | ENSSSCT00000011974 | ERCC6L2 | intron     | .      | rs792141902   | 2 |
| AG.CT         | 10 | 30596947 | 30596962 | 8       | .                  | .       | intergenic | -0.102 | rs792138543   | 2 |
| AAAAC.GTTTT   | 10 | 30750516 | 30750530 | 3       | .                  | .       | intergenic | 0.043  | .             | 2 |
| AT.AT         | 10 | 30941517 | 30941535 | 9.5     | .                  | .       | intergenic | .      | rs790881526   | 3 |
| AT.AT         | 10 | 31046603 | 31046612 | 5       | .                  | .       | intergenic | .      | rs790445697   | 2 |

|             |    |          |          |         |                    |         |            |        |                    |   |
|-------------|----|----------|----------|---------|--------------------|---------|------------|--------|--------------------|---|
| AAC.GTT     | 10 | 31050640 | 31050653 | 4.66667 | .                  | .       | intergenic | .      | rs788473766        | 2 |
| AT.AT       | 10 | 31180813 | 31180823 | 5.5     | .                  | .       | intergenic | .      | rs793333513        | 2 |
| AG.CT       | 10 | 31224357 | 31224375 | 9.5     | .                  | .       | intergenic | .      | rs786876858        | 2 |
| AT.AT       | 10 | 31251517 | 31251532 | 8       | ENSSSCT00000031684 | .       | promoter   | 0.044  | 180529 rs7911      | 3 |
| AAT.ATT     | 10 | 31480790 | 31480811 | 7.33333 | .                  | .       | intergenic | -0.181 | rs793455068        | 2 |
| AG.CT       | 10 | 31692892 | 31692903 | 6       | .                  | .       | intergenic | 0.035  | rs791478951        | 4 |
| AC.GT       | 10 | 31802041 | 31802055 | 7.5     | ENSSSCT00000011979 | FBP1    | intron     | -0.022 | rs788895371        | 5 |
| AAAT.ATTT   | 10 | 31851266 | 31851284 | 4.75    | ENSSSCT00000011982 | FBP2    | intron     | .      | rs799286 rs7898    | 2 |
| AC.GT       | 10 | 31976701 | 31976720 | 10      | ENSSSCT00000026142 | DAPK1   | intron     | .      | rs790915979        | 2 |
| AAAC.GTTT   | 10 | 31996849 | 31996867 | 4.75    | ENSSSCT00000026142 | DAPK1   | intron     | .      | rs792578163        | 2 |
| AAAC.GTTT   | 10 | 31996849 | 31996867 | 4.75    | ENSSSCT00000011985 | .       | intron     | .      | rs792578163        | 2 |
| AAC.GTT     | 10 | 32156204 | 32156224 | 7       | .                  | .       | intergenic | 0.041  | rs791813333        | 2 |
| AC.GT       | 10 | 32163926 | 32163949 | 12      | .                  | .       | intergenic | .      | .                  | 4 |
| AT.AT       | 10 | 32335382 | 32335391 | 5       | .                  | .       | intergenic | 0.828  | .                  | 2 |
| AT.AT       | 10 | 32503085 | 32503094 | 5       | .                  | .       | intergenic | -0.1   | rs793617288        | 2 |
| AAAAT.ATTTT | 10 | 32604334 | 32604355 | 4.4     | .                  | .       | intergenic | 0.003  | rs789304099        | 2 |
| AAC.GTT     | 10 | 32765995 | 32766015 | 7       | .                  | .       | intergenic | -0.312 | rs790527237        | 3 |
| AG.CT       | 10 | 32830312 | 32830323 | 6       | .                  | .       | intergenic | 0.17   | .                  | 2 |
| ACAT.ATGT   | 10 | 32923147 | 32923162 | 4       | .                  | .       | intergenic | -0.461 | rs7932140 rs7898   | 3 |
| AC.GT       | 10 | 32927870 | 32927881 | 6       | .                  | .       | intergenic | -0.12  | rs790392673        | 2 |
| AC.GT       | 10 | 32942866 | 32942895 | 15      | .                  | .       | intergenic | 0.145  | rs792398287        | 2 |
| AAAC.GTTT   | 10 | 32958465 | 32958479 | 3.75    | .                  | .       | intergenic | 0.589  | rs786812595        | 2 |
| AAAG.CTTT   | 10 | 32966547 | 32966565 | 4.75    | .                  | .       | intergenic | .      | rs793845191        | 2 |
| AC.GT       | 10 | 33011054 | 33011068 | 7.5     | .                  | .       | intergenic | 0.724  | rs793569321        | 3 |
| AAAC.GTTT   | 10 | 33195079 | 33195093 | 3.75    | ENSSSCT00000011991 | GOLM1   | intron     | .      | rs781843 rs7867    | 2 |
| AAAC.GTTT   | 10 | 33199519 | 33199533 | 3.75    | ENSSSCT00000011991 | GOLM1   | intron     | .      | rs787216146        | 2 |
| AAAC.GTTT   | 10 | 33428441 | 33428457 | 4.25    | .                  | .       | intergenic | .      | rs787884701        | 2 |
| AC.GT       | 10 | 33442343 | 33442365 | 11.5    | .                  | .       | intergenic | .      | .                  | 3 |
| AT.AT       | 10 | 33471020 | 33471033 | 7       | .                  | .       | intergenic | .      | rs788560314        | 2 |
| AAAAT.ATTTT | 10 | 33621572 | 33621588 | 3.4     | ENSSSCT00000011993 | .       | intron     | 0.13   | rs7935555 rs7913   | 2 |
| AAAAG.CTTT  | 10 | 33736479 | 33736502 | 4.8     | .                  | .       | intergenic | -0.227 | rs792376736        | 2 |
| AAT.ATT     | 10 | 33781409 | 33781424 | 5.33333 | .                  | .       | intergenic | .      | rs786972405        | 2 |
| AAAC.GTTT   | 10 | 34055560 | 34055586 | 6.75    | .                  | .       | intergenic | -0.089 | rs788715586        | 2 |
| ACC.GGT     | 10 | 34066589 | 34066610 | 7.33333 | .                  | .       | intergenic | -0.281 | rs789839184        | 2 |
| AAAG.CTTT   | 10 | 34097263 | 34097277 | 3.75    | .                  | .       | intergenic | -0.17  | rs788584249        | 2 |
| AAAT.ATTT   | 10 | 34220671 | 34220692 | 5.5     | .                  | .       | intergenic | -0.064 | rs786530455        | 2 |
| AG.CT       | 10 | 34223293 | 34223303 | 5.5     | .                  | .       | intergenic | 0.1    | .                  | 2 |
| AAAT.ATTT   | 10 | 34264504 | 34264530 | 6.75    | ENSSSCT00000011996 | NTRK2   | intron     | -0.077 | rs796454 rs7866    | 2 |
| AAAT.ATTT   | 10 | 34264504 | 34264530 | 6.75    | ENSSSCT00000011995 | NTRK2   | intron     | -0.077 | rs796454 rs7866    | 2 |
| AAAAC.GTTTT | 10 | 34345284 | 34345307 | 4.8     | .                  | .       | intergenic | 0.746  | .                  | 2 |
| AAAAT.ATTTT | 10 | 34417999 | 34418023 | 5       | .                  | .       | intergenic | .      | rs786382970        | 2 |
| AC.GT       | 10 | 34532000 | 34532012 | 6.5     | .                  | .       | intergenic | -0.029 | rs7919025 rs6905   | 3 |
| AATG.CATT   | 10 | 34773258 | 34773280 | 5.75    | .                  | .       | intergenic | 0.211  | rs793576689        | 2 |
| AAG.CTT     | 10 | 34839027 | 34839042 | 5.33333 | .                  | .       | intergenic | 0.247  | rs788329598        | 2 |
| AAAAG.CTTT  | 10 | 34909221 | 34909243 | 4.6     | .                  | .       | intergenic | .      | rs79143411 rs7868  | 2 |
| AT.AT       | 10 | 35050049 | 35050063 | 7.5     | .                  | .       | intergenic | -0.035 | rs79156289 rs7899  | 2 |
| AAAAT.ATTTT | 10 | 35371334 | 35371353 | 4       | ENSSSCT00000027988 | UBQLN1  | intron     | -0.043 | rs786760116        | 2 |
| AAAAC.GTTTT | 10 | 35445376 | 35445410 | 5.83333 | .                  | .       | intergenic | 0.135  | rs787078489        | 2 |
| AG.CT       | 10 | 35468402 | 35468427 | 13      | .                  | .       | intergenic | 0.082  | rs79145595 rs7867  | 4 |
| AAAAC.GTTTT | 10 | 35469040 | 35469067 | 5.6     | .                  | .       | intergenic | 0.153  | rs791130341        | 2 |
| AC.GT       | 10 | 35490880 | 35490900 | 10.5    | .                  | .       | intergenic | .      | rs79163309 rs7929  | 2 |
| AT.AT       | 10 | 35546911 | 35546921 | 5.5     | .                  | .       | intergenic | .      | rs793622590        | 2 |
| AC.GT       | 10 | 35557876 | 35557888 | 6.5     | .                  | .       | intergenic | 0.157  | .                  | 2 |
| AAAC.GTTT   | 10 | 35732493 | 35732511 | 4.75    | ENSSSCT00000011999 | FRMD3   | intron     | -0.189 | rs790744873        | 2 |
| AT.AT       | 10 | 35775502 | 35775521 | 10      | ENSSSCT00000011999 | FRMD3   | intron     | -0.23  | .                  | 2 |
| AC.GT       | 10 | 35805499 | 35805510 | 6       | .                  | .       | intergenic | .      | rs786465848        | 4 |
| AC.GT       | 10 | 35808865 | 35808875 | 5.5     | .                  | .       | intergenic | .      | rs79297622 rs7918  | 2 |
| AC.GT       | 10 | 36040314 | 36040340 | 13.5    | .                  | .       | intergenic | 0.352  | rs79369498 rs7900  | 2 |
| AAAC.GTTT   | 10 | 36068403 | 36068417 | 3.75    | .                  | .       | intergenic | 0.017  | rs793694323775     | 3 |
| AT.AT       | 10 | 36113255 | 36113273 | 9.5     | ENSSSCT00000012001 | RASEF   | intron     | 0.038  | rs79377930 rs7921  | 2 |
| AAC.GTT     | 10 | 36498424 | 36498439 | 5.33333 | .                  | .       | intergenic | 0.232  | rs793701877        | 2 |
| AAAAC.GTTTT | 10 | 37107687 | 37107716 | 5       | ENSSSCT00000012026 | UBAP2   | intron     | -0.231 | .                  | 2 |
| AAAAC.GTTTT | 10 | 37107687 | 37107716 | 5       | ENSSSCT00000025202 | NORD121 | promoter   | -0.231 | .                  | 2 |
| AC.GT       | 10 | 37208291 | 37208304 | 7       | .                  | .       | intergenic | .      | rs786784548        | 2 |
| AC.GT       | 10 | 37356048 | 37356063 | 8       | .                  | .       | intergenic | 0.336  | .                  | 2 |
| AATC.GATT   | 10 | 37410805 | 37410828 | 6       | ENSSSCT00000012035 | .       | intron     | .      | rs787755876        | 2 |
| AAAT.ATTT   | 10 | 37477310 | 37477335 | 6.5     | ENSSSCT00000012036 | CHMP5   | intron     | 0.165  | rs792920474        | 2 |
| AT.AT       | 10 | 37480574 | 37480596 | 11.5    | ENSSSCT00000012036 | CHMP5   | intron     | -0.333 | rs789806657        | 2 |
| AAAC.GTTT   | 10 | 37655646 | 37655665 | 5       | ENSSSCT00000012041 | SMU1    | intron     | .      | rs787365275        | 2 |
| AAAC.GTTT   | 10 | 37666431 | 37666449 | 4.75    | ENSSSCT00000012041 | SMU1    | intron     | 0.316  | rs791787172 rs7875 | 2 |
| AAAC.GTTT   | 10 | 37788592 | 37788616 | 6.25    | ENSSSCT00000012043 | APTX    | intron     | 0.186  | rs791910246        | 2 |
| AG.CT       | 10 | 38113167 | 38113179 | 6.5     | ENSSSCT00000012045 | NDUFB6  | intron     | 0.008  | rs788084693        | 2 |
| AC.GT       | 10 | 38246547 | 38246557 | 5.5     | .                  | .       | intergenic | -0.045 | rs793690988480     | 3 |
| AAAG.CTTT   | 10 | 38248250 | 38248277 | 7       | .                  | .       | intergenic | .      | rs79340732 rs7920  | 2 |
| AT.AT       | 10 | 38362200 | 38362211 | 6       | .                  | .       | intergenic | 0.183  | rs793773173 rs7925 | 2 |
| AT.AT       | 10 | 38800439 | 38800449 | 5.5     | .                  | .       | intergenic | 0.103  | rs787349895        | 2 |
| AGGG.CCCT   | 10 | 38870894 | 38870912 | 4.75    | .                  | .       | intergenic | 0.138  | rs787116052        | 2 |
| AC.GT       | 10 | 39047295 | 39047318 | 12      | .                  | .       | intergenic | 0.151  | rs792957186        | 4 |
| AT.AT       | 10 | 39407315 | 39407329 | 7.5     | .                  | .       | intergenic | 0.12   | rs787020106        | 2 |
| AC.GT       | 10 | 39409019 | 39409038 | 10      | .                  | .       | intergenic | 0.203  | .                  | 4 |
| AC.GT       | 10 | 39431874 | 39431889 | 8       | .                  | .       | intergenic | .      | rs786463274        | 4 |
| AC.GT       | 10 | 39488831 | 39488860 | 15      | .                  | .       | intergenic | -0.245 | .                  | 2 |
| AT.AT       | 10 | 39513791 | 39513820 | 15      | .                  | .       | intergenic | 0.056  | rs79350459 rs7864  | 2 |
| AG.CT       | 10 | 39682266 | 39682280 | 7.5     | .                  | .       | intergenic | -0.188 | rs793433799        | 2 |

|              |    |          |          |         |                    |          |            |        |                 |   |
|--------------|----|----------|----------|---------|--------------------|----------|------------|--------|-----------------|---|
| AAG.CTT      | 10 | 39725120 | 39725135 | 5.33333 | .                  | .        | intergenic | .      | rs788722477     | 2 |
| AC.GT        | 10 | 39881437 | 39881447 | 5.5     | .                  | .        | intergenic | .      | rs793397347     | 2 |
| AT.AT        | 10 | 40117962 | 40117991 | 15      | .                  | .        | intergenic | .      | .               | 2 |
| AAAC.GTTT    | 10 | 40255975 | 40255997 | 5.75    | .                  | .        | intergenic | .      | rs10030 rs7899  | 2 |
| AAC.GTT      | 10 | 40282082 | 40282099 | 6       | .                  | .        | intergenic | .      | rs788220660     | 2 |
| AAAT.ATTT    | 10 | 40379626 | 40379640 | 3.75    | .                  | .        | intergenic | 0.157  | .               | 2 |
| AAAT.ATTT    | 10 | 40388506 | 40388527 | 5.5     | .                  | .        | intergenic | .      | rs792137424     | 2 |
| AAAC.GTTT    | 10 | 40394036 | 40394073 | 9.5     | .                  | .        | intergenic | .      | rs791673532     | 2 |
| AG.CT        | 10 | 40414050 | 40414070 | 10.5    | .                  | .        | intergenic | .      | rs788254004     | 2 |
| AGAT.ATCT    | 10 | 40587363 | 40587404 | 10.5    | .                  | .        | intergenic | 0.036  | rs788132469     | 4 |
| AC.GT        | 10 | 40628276 | 40628291 | 8       | .                  | .        | intergenic | 0.044  | rs758910 rs7919 | 3 |
| AT.AT        | 10 | 40806803 | 40806830 | 14      | .                  | .        | intergenic | -0.089 | rs788584603     | 4 |
| AAAG.CTTT    | 10 | 40840925 | 40840939 | 3.75    | .                  | .        | intergenic | .      | .               | 2 |
| AAAT.ATTT    | 10 | 40845190 | 40845207 | 4.5     | .                  | .        | intergenic | .      | .               | 2 |
| AT.AT        | 10 | 40878006 | 40878017 | 6       | .                  | .        | intergenic | -0.131 | rs282637 rs7888 | 3 |
| AAAT.ATTT    | 10 | 41051394 | 41051423 | 7.5     | .                  | .        | intergenic | 0.116  | rs788506665     | 2 |
| AC.GT        | 10 | 41103005 | 41103023 | 9.5     | .                  | .        | intergenic | .      | rs790867697     | 7 |
| AT.AT        | 10 | 41197409 | 41197420 | 6       | .                  | .        | intergenic | -0.042 | rs792852727     | 3 |
| AAT.ATT      | 10 | 41390706 | 41390729 | 8       | .                  | .        | intergenic | .      | .               | 2 |
| AAATT.AATTT  | 10 | 41433941 | 41433955 | 3       | .                  | .        | intergenic | .      | rs717375 rs7894 | 2 |
| AT.AT        | 10 | 41490324 | 41490333 | 5       | .                  | .        | intergenic | 0.174  | rs789519210     | 2 |
| AC.GT        | 10 | 41703941 | 41703954 | 7       | .                  | .        | intergenic | .      | rs789643408     | 5 |
| AT.AT        | 10 | 41785739 | 41785748 | 5       | .                  | .        | intergenic | 0.445  | rs702068 rs7917 | 2 |
| AT.AT        | 10 | 41814503 | 41814517 | 7.5     | .                  | .        | intergenic | 0.18   | rs792953018     | 2 |
| AG.CT        | 10 | 41971237 | 41971251 | 7.5     | .                  | .        | intergenic | .      | rs791942931     | 4 |
| AAAAC.GTTTT  | 10 | 41984045 | 41984065 | 4.2     | .                  | .        | intergenic | 0.168  | rs790168878     | 2 |
| AAAAG.CTTTT  | 10 | 42094548 | 42094573 | 5.2     | .                  | .        | intergenic | 0.113  | rs786694622     | 2 |
| AT.AT        | 10 | 42238136 | 42238147 | 6       | .                  | .        | intergenic | .      | rs787338091     | 2 |
| AAC.GTT      | 10 | 42307921 | 42307936 | 5.33333 | .                  | .        | intergenic | -0.161 | rs789324582     | 2 |
| AAAC.GTTT    | 10 | 42572964 | 42572978 | 3.75    | .                  | .        | intergenic | -0.076 | rs792021027     | 2 |
| AAAT.ATTT    | 10 | 42579574 | 42579594 | 5.25    | .                  | .        | intergenic | -0.05  | rs366930 rs7893 | 2 |
| AT.AT        | 10 | 42710756 | 42710778 | 11.5    | .                  | .        | intergenic | .      | rs704899 rs7926 | 2 |
| AAC.GTT      | 10 | 42715172 | 42715188 | 5.66667 | .                  | .        | intergenic | .      | rs708403384     | 2 |
| AG.CT        | 10 | 42803133 | 42803163 | 15.5    | .                  | .        | intergenic | 0.069  | rs394620 rs7891 | 2 |
| AT.AT        | 10 | 43057593 | 43057607 | 7.5     | .                  | .        | intergenic | 0.024  | .               | 4 |
| ATCC.GGAT    | 10 | 43092041 | 43092055 | 3.75    | .                  | .        | intergenic | 0.142  | .               | 2 |
| AATT.AATT    | 10 | 43410121 | 43410135 | 3.75    | .                  | .        | intergenic | -0.169 | rs792797493     | 2 |
| AT.AT        | 10 | 43527201 | 43527218 | 9       | .                  | .        | intergenic | .      | rs789051924     | 2 |
| AAAG.CTTT    | 10 | 43684762 | 43684777 | 4       | .                  | .        | intergenic | -0.085 | rs370954 rs7907 | 4 |
| AAAC.GTTT    | 10 | 43760330 | 43760343 | 3.5     | .                  | .        | intergenic | 0.242  | rs792541828     | 2 |
| AC.GT        | 10 | 43805459 | 43805471 | 6.5     | .                  | .        | intergenic | .      | rs378933 rs7921 | 2 |
| AAAAAT.ATTTT | 10 | 43806696 | 43806721 | 4.33333 | .                  | .        | intergenic | .      | rs790717523     | 2 |
| AT.AT        | 10 | 43913986 | 43913996 | 5.5     | .                  | .        | intergenic | .      | rs792944589     | 2 |
| AAAC.GTTT    | 10 | 43925829 | 43925847 | 4.75    | .                  | .        | intergenic | .      | rs160805 rs7916 | 2 |
| AAAG.CTTT    | 10 | 44024024 | 44024044 | 5.25    | .                  | .        | intergenic | 0.097  | rs793786850     | 2 |
| AAC.GTT      | 10 | 44053925 | 44053937 | 4.33333 | .                  | .        | intergenic | 0.106  | rs303606 rs7926 | 2 |
| AAAC.GTTT    | 10 | 44657796 | 44657814 | 4.75    | .                  | .        | intergenic | -0.271 | rs791141472     | 2 |
| AGG.CCT      | 10 | 44693898 | 44693916 | 6.33333 | .                  | .        | intergenic | -0.064 | .               | 2 |
| AG.CT        | 10 | 44755711 | 44755722 | 6       | .                  | .        | intergenic | 0.009  | .               | 3 |
| AT.AT        | 10 | 44826432 | 44826442 | 5.5     | .                  | .        | intergenic | -0.035 | rs733091 rs7865 | 2 |
| AAAAAG.CTTTT | 10 | 45029561 | 45029588 | 4.66667 | .                  | .        | intergenic | .      | rs792891109     | 2 |
| AAAC.GTTT    | 10 | 45118050 | 45118066 | 4.25    | ENSSSCT00000034425 | MAP3K8   | intron     | 0.492  | rs793489797     | 2 |
| AAAC.GTTT    | 10 | 45118050 | 45118066 | 4.25    | ENSSSCT00000033487 | MAP3K8   | intron     | 0.492  | rs793489797     | 2 |
| AAAC.GTTT    | 10 | 45118050 | 45118066 | 4.25    | ENSSSCT00000033089 | MAP3K8   | intron     | 0.492  | rs793489797     | 2 |
| AC.GT        | 10 | 45243640 | 45243652 | 6.5     | .                  | .        | intergenic | .      | rs268936 rs7911 | 2 |
| ACTC.GAGT    | 10 | 45385967 | 45385981 | 3.75    | ENSSSCT00000024823 | KIAA1462 | promoter   | -0.17  | rs790486082     | 2 |
| ACTC.GAGT    | 10 | 45385967 | 45385981 | 3.75    | ENSSSCT00000012062 | KIAA1462 | promoter   | -0.17  | rs790486082     | 2 |
| AC.GT        | 10 | 45394370 | 45394384 | 7.5     | ENSSSCT00000024823 | KIAA1462 | intron     | -0.066 | .               | 2 |
| AC.GT        | 10 | 45394370 | 45394384 | 7.5     | ENSSSCT00000012062 | KIAA1462 | intron     | -0.066 | .               | 2 |
| AAC.GTT      | 10 | 45424173 | 45424186 | 4.66667 | ENSSSCT00000024823 | KIAA1462 | intron     | -0.157 | rs790099975     | 2 |
| AAC.GTT      | 10 | 45424173 | 45424186 | 4.66667 | ENSSSCT00000012062 | KIAA1462 | intron     | -0.157 | rs790099975     | 2 |
| AGGG.CCCT    | 10 | 45571974 | 45571994 | 5.25    | .                  | .        | intergenic | .      | rs789875897     | 2 |
| AAAAG.CTTTT  | 10 | 45716852 | 45716868 | 3.4     | .                  | .        | intergenic | -0.082 | rs788109735     | 2 |
| AAC.GTT      | 10 | 45917218 | 45917244 | 9       | ENSSSCT00000012064 | SVIL     | intron     | -0.084 | rs791084106     | 2 |
| AAC.GTT      | 10 | 45917218 | 45917244 | 9       | ENSSSCT00000012066 | SVIL     | intron     | -0.084 | rs791084106     | 2 |
| AC.GT        | 10 | 45945136 | 45945146 | 5.5     | ENSSSCT00000012064 | SVIL     | intron     | -0.653 | rs789625042     | 3 |
| AC.GT        | 10 | 45945136 | 45945146 | 5.5     | ENSSSCT00000012066 | SVIL     | intron     | -0.653 | rs789625042     | 3 |
| AC.GT        | 10 | 45984606 | 45984634 | 14.5    | ENSSSCT00000012064 | SVIL     | intron     | -0.273 | rs789703627     | 2 |
| AC.GT        | 10 | 45984606 | 45984634 | 14.5    | ENSSSCT00000012066 | SVIL     | intron     | -0.273 | rs789703627     | 2 |
| AC.GT        | 10 | 46130066 | 46130084 | 9.5     | .                  | .        | intergenic | .      | .               | 2 |
| AAAT.ATTT    | 10 | 46170265 | 46170287 | 5.75    | .                  | .        | intergenic | 0.308  | rs790796770     | 2 |
| AT.AT        | 10 | 46301895 | 46301905 | 5.5     | .                  | .        | intergenic | .      | rs789540306     | 2 |
| AT.AT        | 10 | 46482587 | 46482601 | 7.5     | .                  | .        | intergenic | 0.239  | .               | 4 |
| AAC.GTT      | 10 | 46576031 | 46576047 | 5.66667 | ENSSSCT00000035562 | ZEB1     | intron     | 0.267  | rs792287309     | 2 |
| AAAC.GTTT    | 10 | 46616398 | 46616410 | 3.25    | ENSSSCT00000035562 | ZEB1     | intron     | 0.116  | rs793107734     | 2 |
| AC.GT        | 10 | 46947134 | 46947153 | 10      | .                  | .        | intergenic | .      | .               | 3 |
| AT.AT        | 10 | 46957538 | 46957548 | 5.5     | .                  | .        | intergenic | .      | rs380583 rs7908 | 2 |
| AT.AT        | 10 | 46973893 | 46973905 | 6.5     | .                  | .        | intergenic | 0.141  | .               | 2 |
| AAAG.CTTT    | 10 | 47281806 | 47281824 | 4.75    | ENSSSCT00000012069 | KIF5B    | intron     | 0.291  | rs155021 rs7863 | 2 |
| ACAG.CTGT    | 10 | 47282471 | 47282497 | 6.75    | ENSSSCT00000012069 | KIF5B    | intron     | .      | rs358657 rs7865 | 2 |
| AAAAT.ATTTT  | 10 | 47953291 | 47953306 | 3.2     | ENSSSCT00000012072 | CUBN     | intron     | 0.05   | rs787458564     | 2 |
| AG.CT        | 10 | 48014021 | 48014039 | 9.5     | .                  | .        | intergenic | -0.073 | rs376695 rs7902 | 2 |
| AC.GT        | 10 | 48252393 | 48252407 | 7.5     | .                  | .        | intergenic | 0.215  | rs360711 rs7873 | 4 |
| AAC.GTT      | 10 | 48386158 | 48386171 | 4.66667 | .                  | .        | intergenic | 0.77   | rs788364054     | 2 |

|              |    |          |          |         |                              |   |            |        |                 |   |
|--------------|----|----------|----------|---------|------------------------------|---|------------|--------|-----------------|---|
| AAAAG.CTTTT  | 10 | 48607761 | 48607786 | 4.33333 | ENSSSCT00000012078           | . | intron     | 0.015  | rs694656015     | 2 |
| AGAT.ATCT    | 10 | 48625461 | 48625483 | 5.75    | .                            | . | intergenic | 0.16   | rs23197 rs7929  | 2 |
| AG.CT        | 10 | 48730794 | 48730803 | 5       | .                            | . | intergenic | -0.129 | rs793568983     | 2 |
| AAC.GTT      | 10 | 48758514 | 48758534 | 7       | ENSSSCT00000012080           | . | intron     | -0.682 | rs33319 rs7922  | 2 |
| AC.GT        | 10 | 48893453 | 48893463 | 5.5     | ENSSSCT00000012082 H242-21O2 | . | intron     | -0.27  | .               | 3 |
| AAAC.GTTT    | 10 | 48901524 | 48901546 | 5.75    | ENSSSCT00000012082 H242-21O2 | . | intron     | -0.831 | rs799126 rs7903 | 2 |
| AACC.GGTT    | 10 | 48970206 | 48970219 | 3.5     | .                            | . | intergenic | -0.012 | rs391073 rs7876 | 2 |
| AAAC.GTTT    | 10 | 49086444 | 49086462 | 4.75    | .                            | . | intergenic | .      | rs790377612     | 2 |
| AC.GT        | 10 | 49231913 | 49231926 | 7       | .                            | . | intergenic | -0.092 | rs691181848     | 2 |
| AAAG.CTTT    | 10 | 49412392 | 49412407 | 4       | .                            | . | intergenic | -0.111 | rs786465961     | 2 |
| AAAT.ATTT    | 10 | 49461371 | 49461387 | 4.25    | .                            | . | intergenic | .      | rs789197907     | 2 |
| AT.AT        | 10 | 49654268 | 49654279 | 6       | ENSSSCT00000012085           | . | intron     | .      | rs114463 rs7862 | 3 |
| AC.GT        | 10 | 49665013 | 49665032 | 10      | ENSSSCT00000012085           | . | intron     | .      | rs791153623     | 2 |
| AAT.ATT      | 10 | 49734174 | 49734187 | 4.66667 | .                            | . | intergenic | .      | rs789756776     | 2 |
| AAAG.CTTT    | 10 | 49925942 | 49925954 | 3.25    | .                            | . | intergenic | 0.103  | rs372807 rs7931 | 2 |
| AAT.ATT      | 10 | 50013983 | 50014000 | 6       | .                            | . | intergenic | -0.192 | rs377612 rs7869 | 2 |
| AT.AT        | 10 | 50073533 | 50073544 | 6       | .                            | . | intergenic | 2.941  | rs788079614     | 2 |
| AAAAC.GTTTT  | 10 | 50169484 | 50169502 | 3.8     | ENSSSCT00000026176           | . | intron     | 0.331  | rs792572016     | 2 |
| AAAG.CTTT    | 10 | 50174660 | 50174674 | 3.75    | ENSSSCT00000026176           | . | intron     | -0.165 | rs787673008     | 2 |
| AC.GT        | 10 | 50218384 | 50218396 | 6.5     | .                            | . | intergenic | -0.033 | rs329005 rs7862 | 3 |
| AAAC.GTTT    | 10 | 50395728 | 50395749 | 5.5     | .                            | . | intergenic | -0.089 | rs163229 rs7862 | 2 |
| AGATAT.ATATC | 10 | 50471954 | 50471986 | 5.5     | .                            | . | intergenic | -0.157 | rs788052573     | 2 |
| ACATG.CATGT  | 10 | 50603290 | 50603314 | 5       | .                            | . | intergenic | .      | rs791614895     | 2 |
| AAAT.ATTT    | 10 | 50678361 | 50678378 | 4.5     | ENSSSCT00000012089 FAM188A   | . | intron     | 0.225  | rs790602660     | 2 |
| AT.AT        | 10 | 50738139 | 50738148 | 5       | ENSSSCT00000012089 FAM188A   | . | intron     | .      | rs790275020     | 2 |
| AAAT.ATTT    | 10 | 50802875 | 50802894 | 5       | .                            | . | intergenic | -0.015 | rs319793 rs7921 | 2 |
| AC.GT        | 10 | 50835571 | 50835590 | 10      | ENSSSCT00000012090 ITGA8     | . | intron     | -0.03  | .               | 3 |
| ATCC.GGAT    | 10 | 50986655 | 50986677 | 5.75    | ENSSSCT00000012090 ITGA8     | . | intron     | -0.044 | rs791287109     | 2 |
| AT.AT        | 10 | 51182090 | 51182100 | 5.5     | ENSSSCT00000012091 FAM171A1  | . | intron     | 0.433  | rs792364023     | 3 |
| AG.CT        | 10 | 51212597 | 51212611 | 7.5     | ENSSSCT00000012091 FAM171A1  | . | intron     | 0.016  | rs333993 rs7886 | 2 |
| AGGG.CCCT    | 10 | 51455957 | 51455975 | 4.75    | ENSSSCT00000024077 RPP38     | . | intron     | -0.121 | rs399592 rs7899 | 2 |
| AGG.CCT      | 10 | 51595725 | 51595741 | 5.66667 | ENSSSCT00000012093 DCLRE1C   | . | cds        | 0.731  | rs787346006     | 2 |
| AGG.CCT      | 10 | 51595725 | 51595741 | 5.66667 | ENSSSCT00000012093 DCLRE1C   | . | intron     | 0.731  | rs787346006     | 2 |
| AAAT.ATTT    | 10 | 51809083 | 51809098 | 4       | .                            | . | intergenic | .      | rs792459203     | 2 |
| AC.GT        | 10 | 51855840 | 51855850 | 5.5     | .                            | . | intergenic | 0.079  | .               | 2 |
| ACAG.CTGT    | 10 | 52068045 | 52068071 | 6.75    | .                            | . | intergenic | 0.143  | rs300737 rs7930 | 2 |
| AG.CT        | 10 | 52391721 | 52391734 | 7       | .                            | . | intergenic | 0.156  | rs204346 rs7883 | 2 |
| AC.GT        | 10 | 52396442 | 52396463 | 11      | .                            | . | intergenic | -0.141 | rs786860558     | 2 |
| AT.AT        | 10 | 52397734 | 52397745 | 6       | .                            | . | intergenic | 0.259  | rs789271449     | 2 |
| AG.CT        | 10 | 52467943 | 52467960 | 9       | .                            | . | intergenic | 0.211  | rs789224 rs7893 | 2 |
| AG.CT        | 10 | 52491127 | 52491144 | 9       | .                            | . | intergenic | 0.894  | rs787756435     | 2 |
| AT.AT        | 10 | 52547146 | 52547157 | 6       | .                            | . | intergenic | 0.356  | rs774432 rs7907 | 2 |
| AG.CT        | 10 | 52550689 | 52550707 | 9.5     | .                            | . | intergenic | -0.067 | rs248980 rs7885 | 2 |
| AC.GT        | 10 | 52797217 | 52797227 | 5.5     | ENSSSCT00000012100           | . | intron     | .      | .               | 3 |
| AC.GT        | 10 | 53122060 | 53122074 | 7.5     | ENSSSCT00000012114 MPP7      | . | intron     | -0.032 | rs789666518     | 2 |
| AAAT.ATTT    | 10 | 53357554 | 53357574 | 5.25    | ENSSSCT00000026458           | . | intron     | .      | rs387048 rs7887 | 2 |
| AAAAG.CTTTT  | 10 | 53696426 | 53696452 | 5.4     | .                            | . | intergenic | 0.181  | rs302542 rs7869 | 2 |
| AT.AT        | 10 | 53808752 | 53808761 | 5       | .                            | . | intergenic | .      | .               | 4 |
| AAAC.GTTT    | 10 | 54023464 | 54023482 | 4.75    | ENSSSCT00000012110 YME1L1    | . | promoter   | 0.181  | rs375231 rs7883 | 2 |
| AAC.GTT      | 10 | 54120513 | 54120532 | 6.66667 | ENSSSCT00000012112           | . | intron     | 0.134  | rs345183 rs7865 | 2 |
| AAAT.ATTT    | 10 | 54560177 | 54560195 | 4.75    | .                            | . | intergenic | 0.352  | rs714390 rs7902 | 2 |
| ATC.GAT      | 10 | 54565508 | 54565527 | 6.66667 | .                            | . | intergenic | 0.067  | rs790550532     | 2 |
| AAAT.ATTT    | 10 | 54574195 | 54574212 | 4.5     | .                            | . | intergenic | 0.138  | rs790365345     | 2 |
| AAAT.ATTT    | 10 | 54599132 | 54599146 | 3.75    | .                            | . | intergenic | 0.2    | rs264326 rs7938 | 2 |
| AAAG.CTTT    | 10 | 54725088 | 54725106 | 4.75    | .                            | . | intergenic | .      | rs793236715     | 2 |
| AT.AT        | 10 | 54812566 | 54812577 | 6       | ENSSSCT00000012103 MYO3A     | . | intron     | 0.075  | .               | 2 |
| AAAAC.GTTTT  | 10 | 54818557 | 54818575 | 3.16667 | ENSSSCT00000012103 MYO3A     | . | intron     | 1.311  | rs164480 rs7897 | 2 |
| AAAT.ATTT    | 10 | 54822690 | 54822712 | 5.75    | ENSSSCT00000012103 MYO3A     | . | intron     | 0.323  | rs788770853     | 2 |
| AC.GT        | 10 | 54926351 | 54926360 | 5       | .                            | . | intergenic | 0.208  | .               | 3 |
| AAAT.ATTT    | 10 | 54942573 | 54942584 | 3       | .                            | . | intergenic | 0.265  | rs786557547     | 2 |
| AAAAC.GTTTT  | 10 | 54971915 | 54971941 | 4.5     | .                            | . | intergenic | -0.172 | rs788357612     | 2 |
| AG.CT        | 10 | 55015962 | 55015972 | 5.5     | .                            | . | intergenic | 0.146  | .               | 4 |
| AAC.GTT      | 10 | 55030349 | 55030365 | 5.66667 | .                            | . | intergenic | 0.058  | rs307906 rs7891 | 2 |
| AAAC.GTTT    | 10 | 55104315 | 55104330 | 4       | .                            | . | intergenic | 0.004  | rs789420311     | 2 |
| AT.AT        | 10 | 55497997 | 55498017 | 10.5    | .                            | . | intergenic | .      | rs183017 rs7877 | 2 |
| AAG.CTT      | 10 | 55566380 | 55566394 | 5       | .                            | . | intergenic | .      | rs790324247     | 2 |
| AAAT.ATTT    | 10 | 55778706 | 55778720 | 3.75    | .                            | . | intergenic | 0.022  | rs789331382     | 2 |
| AT.AT        | 10 | 55872840 | 55872850 | 5.5     | ENSSSCT00000012116           | . | intron     | 0.28   | rs786577071     | 3 |
| ACAG.CTGT    | 10 | 56063685 | 56063707 | 5.75    | ENSSSCT00000012118 ARHGAP21  | . | intron     | 0.125  | rs167272 rs7917 | 2 |
| ACAG.CTGT    | 10 | 56063685 | 56063707 | 5.75    | ENSSSCT00000029464 ARHGAP21  | . | intron     | 0.125  | rs167272 rs7917 | 2 |
| ACAG.CTGT    | 10 | 56063685 | 56063707 | 5.75    | ENSSSCT00000028075 ARHGAP21  | . | intron     | 0.125  | rs167272 rs7917 | 2 |
| AC.GT        | 10 | 56257227 | 56257247 | 10.5    | ENSSSCT00000012119 KIAA1217  | . | intron     | .      | rs385117 rs7906 | 2 |
| AAAT.ATTT    | 10 | 56422321 | 56422337 | 4.25    | .                            | . | intergenic | -0.129 | rs787226325     | 2 |
| AATG.CATT    | 10 | 56518488 | 56518507 | 5       | .                            | . | intergenic | -0.094 | rs789791161     | 2 |
| AAAT.ATTT    | 10 | 57350240 | 57350254 | 3.75    | .                            | . | intergenic | .      | rs790037726     | 2 |
| AAC.GTT      | 10 | 57578893 | 57578906 | 4.66667 | .                            | . | intergenic | -0.085 | rs790361585     | 2 |
| AAC.GTT      | 10 | 57650685 | 57650702 | 6       | ENSSSCT00000012124 ARMC3     | . | intron     | -0.069 | rs790802988     | 2 |
| AAAC.GTTT    | 10 | 57687456 | 57687478 | 5.75    | ENSSSCT00000012124 ARMC3     | . | intron     | 0.223  | rs786264790     | 3 |
| AAT.ATT      | 10 | 57691147 | 57691161 | 5       | ENSSSCT00000012124 ARMC3     | . | intron     | .      | rs791591205     | 2 |
| AG.CT        | 10 | 57789047 | 57789064 | 9       | .                            | . | intergenic | .      | rs696633143     | 4 |
| AAC.GTT      | 10 | 58155533 | 58155549 | 5.66667 | ENSSSCT00000012127 SPAG6     | . | intron     | .      | rs788912012     | 2 |
| AG.CT        | 10 | 58199022 | 58199035 | 7       | ENSSSCT00000012127 SPAG6     | . | intron     | 0.119  | rs787436733     | 3 |
| AAC.GTT      | 10 | 58219431 | 58219450 | 6.66667 | ENSSSCT00000012127 SPAG6     | . | intron     | 0.1    | rs395354 rs7923 | 2 |
| AAAAG.CTTTT  | 10 | 58325441 | 58325461 | 4.2     | .                            | . | intergenic | 0.059  | rs790618 rs7923 | 2 |



|             |    |          |          |         |                    |        |            |        |                    |   |
|-------------|----|----------|----------|---------|--------------------|--------|------------|--------|--------------------|---|
| AAAAT.ATTTT | 10 | 58406797 | 58406819 | 4.6     | .                  | .      | intergenic | .      | rs789959223        | 2 |
| AAAT.ATTT   | 10 | 58508637 | 58508666 | 7.5     | .                  | .      | intergenic | -0.072 | .                  | 2 |
| AAAC.GTTT   | 10 | 58526593 | 58526612 | 5       | .                  | .      | intergenic | 0.357  | rs788295614        | 2 |
| AAAC.GTTT   | 10 | 58745639 | 58745656 | 4.5     | ENSSSCT00000012132 | MLLT10 | intron     | 0.409  | rs787896746        | 2 |
| AAAC.GTTT   | 10 | 58853788 | 58853803 | 4       | ENSSSCT00000012132 | MLLT10 | intron     | 0.103  | rs793812793        | 2 |
| AG.CT       | 10 | 59146851 | 59146871 | 10.5    | .                  | .      | intergenic | 0.216  | .                  | 2 |
| AAAAG.CTTTT | 10 | 59451101 | 59451115 | 3       | .                  | .      | intergenic | -0.075 | rs787115558        | 2 |
| AAAAC.GTTTT | 10 | 59529835 | 59529850 | 3.2     | .                  | .      | intergenic | 0.3    | rs793106034        | 2 |
| AG.CT       | 10 | 59756863 | 59756884 | 11      | .                  | .      | intergenic | -0.004 | rs790861400        | 3 |
| AAAG.CTTT   | 10 | 59791967 | 59791988 | 5.5     | .                  | .      | intergenic | 0.243  | rs788438908        | 2 |
| AC.GT       | 10 | 59807604 | 59807613 | 5       | .                  | .      | intergenic | -0.052 | .                  | 2 |
| AAC.GTT     | 10 | 59899710 | 59899725 | 5.33333 | .                  | .      | intergenic | 0.367  | rs793225345        | 2 |
| AAAAT.ATTTT | 10 | 60015353 | 60015368 | 3.2     | .                  | .      | intergenic | .      | .                  | 2 |
| AAG.CTT     | 10 | 60463494 | 60463510 | 5.66667 | .                  | .      | intergenic | -0.079 | rs785394 rs7920    | 2 |
| AAG.CTT     | 10 | 60540849 | 60540861 | 4.33333 | .                  | .      | intergenic | .      | rs786290967        | 2 |
| AAAC.GTTT   | 10 | 60665727 | 60665740 | 3.5     | .                  | .      | intergenic | .      | rs792175717        | 2 |
| AG.CT       | 10 | 60842415 | 60842426 | 6       | .                  | .      | intergenic | -0.098 | rs790956 rs7920    | 2 |
| AAC.GTT     | 10 | 61035875 | 61035891 | 5.66667 | .                  | .      | intergenic | .      | rs7930326 rs7867   | 2 |
| AAC.GTT     | 10 | 61047727 | 61047750 | 8       | .                  | .      | intergenic | 0.208  | rs791790437        | 2 |
| AAC.GTT     | 10 | 61151849 | 61151860 | 4       | .                  | .      | intergenic | 0.008  | rs789753 rs7868    | 2 |
| AAAC.GTTT   | 10 | 61388243 | 61388266 | 6       | .                  | .      | intergenic | .      | rs789507038        | 2 |
| AT.AT       | 10 | 61417063 | 61417072 | 5       | .                  | .      | intergenic | 0.299  | .                  | 3 |
| AAGG.CCTT   | 10 | 61528058 | 61528082 | 6.25    | .                  | .      | intergenic | 0.165  | rs792621719        | 3 |
| AGGGG.CCCCT | 10 | 61544575 | 61544594 | 4       | .                  | .      | intergenic | -0.063 | rs7926061 rs7881   | 2 |
| AT.AT       | 10 | 61759165 | 61759180 | 8       | ENSSSCT00000033235 | NRP1   | intron     | 0.469  | rs787042928        | 2 |
| AT.AT       | 10 | 61759165 | 61759180 | 8       | ENSSSCT00000035993 | NRP1   | intron     | 0.469  | rs787042928        | 2 |
| AT.AT       | 10 | 61759165 | 61759180 | 8       | ENSSSCT00000012149 | NRP1   | intron     | 0.469  | rs787042928        | 2 |
| AT.AT       | 10 | 61759165 | 61759180 | 8       | ENSSSCT00000034324 | NRP1   | intron     | 0.469  | rs787042928        | 2 |
| AT.AT       | 10 | 61759165 | 61759180 | 8       | ENSSSCT00000034108 | NRP1   | intron     | 0.469  | rs787042928        | 2 |
| AT.AT       | 10 | 61759165 | 61759180 | 8       | ENSSSCT00000035186 | NRP1   | intron     | 0.469  | rs787042928        | 2 |
| AAAC.GTTT   | 10 | 62129018 | 62129044 | 6.75    | .                  | .      | intergenic | 1.038  | rs79108966 rs7918  | 2 |
| AAAAC.GTTTT | 10 | 62169044 | 62169073 | 5       | .                  | .      | intergenic | 0.159  | .                  | 2 |
| AAAAC.GTTTT | 10 | 62191755 | 62191781 | 4.5     | .                  | .      | intergenic | 0.058  | rs697076905        | 2 |
| AAAC.GTTT   | 10 | 62840569 | 62840592 | 6       | ENSSSCT00000012150 | PARD3  | intron     | -0.062 | .                  | 2 |
| AG.CT       | 10 | 62869065 | 62869075 | 5.5     | ENSSSCT00000012150 | PARD3  | intron     | -0.316 | .                  | 3 |
| AC.GT       | 10 | 62973016 | 62973032 | 8.5     | ENSSSCT00000012150 | PARD3  | intron     | 0.552  | .                  | 2 |
| AAAC.GTTT   | 10 | 63094677 | 63094701 | 6.25    | .                  | .      | intergenic | -0.045 | rs793782864 rs7937 | 2 |
| AC.GT       | 10 | 63303295 | 63303305 | 5.5     | ENSSSCT00000012151 | CUL2   | 3'utr      | 0.192  | .                  | 2 |
| AGG.CCT     | 10 | 63349981 | 63349996 | 5.33333 | .                  | .      | intergenic | .      | rs787349103        | 2 |
| AAAC.GTTT   | 10 | 63628210 | 63628231 | 5.5     | ENSSSCT00000012155 | CCNY   | intron     | 0.042  | rs793215 rs7869    | 2 |
| AC.GT       | 10 | 63753703 | 63753735 | 16.5    | .                  | .      | intergenic | 0.201  | rs786733782        | 2 |
| AC.GT       | 10 | 64327260 | 64327274 | 7.5     | .                  | .      | intergenic | -0.09  | .                  | 3 |
| AAAC.GTTT   | 10 | 64461332 | 64461350 | 4.75    | .                  | .      | intergenic | -0.104 | rs787801440        | 2 |
| AAAT.ATTT   | 10 | 64510426 | 64510450 | 6.25    | .                  | .      | intergenic | 0.041  | rs793375663        | 2 |
| AG.CT       | 10 | 64728963 | 64728973 | 5.5     | .                  | .      | intergenic | .      | rs786250222        | 3 |
| AAAAG.CTTTT | 10 | 64754619 | 64754637 | 3.16667 | .                  | .      | intergenic | 0.341  | rs792599884        | 2 |
| AT.AT       | 10 | 64755201 | 64755212 | 6       | .                  | .      | intergenic | 0.27   | rs789314756        | 4 |
| AGG.CCT     | 10 | 64993474 | 64993489 | 5.33333 | .                  | .      | intergenic | 0.077  | rs79325583 rs7938  | 2 |
| AC.GT       | 10 | 65042410 | 65042423 | 7       | .                  | .      | intergenic | -0.185 | rs793736390 rs7892 | 3 |
| AC.GT       | 10 | 65149791 | 65149806 | 8       | .                  | .      | intergenic | .      | .                  | 3 |
| AC.GT       | 10 | 65264057 | 65264070 | 7       | .                  | .      | intergenic | .      | rs787257547        | 2 |
| AC.GT       | 10 | 65294551 | 65294572 | 11      | .                  | .      | intergenic | -0.582 | .                  | 2 |
| AC.GT       | 10 | 65300508 | 65300519 | 6       | .                  | .      | intergenic | .      | rs788604638        | 2 |
| AC.GT       | 10 | 65359386 | 65359397 | 6       | .                  | .      | intergenic | .      | .                  | 2 |
| AAC.GTT     | 10 | 65403253 | 65403271 | 6.33333 | .                  | .      | intergenic | -0.08  | rs7937714 rs7883   | 2 |
| AAAAC.GTTTT | 10 | 65668150 | 65668170 | 4.2     | ENSSSCT00000029333 | .      | intron     | 0.228  | rs787288743        | 2 |
| AAAC.GTTT   | 10 | 65900890 | 65900910 | 5.25    | .                  | .      | intergenic | .      | rs789292636        | 2 |
| AC.GT       | 10 | 66200998 | 66201008 | 5.5     | .                  | .      | intergenic | 0.039  | .                  | 2 |
| AC.GT       | 10 | 66335186 | 66335199 | 7       | .                  | .      | intergenic | -0.306 | rs797468 rs7930    | 2 |
| AAAAC.GTTTT | 10 | 66530778 | 66530803 | 5.2     | .                  | .      | intergenic | .      | rs791009543        | 2 |
| AAGG.CCTT   | 10 | 66676695 | 66676708 | 3.5     | .                  | .      | intergenic | 0.085  | rs7920656 rs7931   | 2 |
| AC.GT       | 10 | 66738092 | 66738105 | 7       | .                  | .      | intergenic | -0.012 | rs787018054        | 2 |
| AATG.CATT   | 10 | 66907552 | 66907571 | 5       | .                  | .      | intergenic | 0.076  | rs787622682        | 2 |
| AAAAT.ATTTT | 10 | 66985185 | 66985208 | 4       | .                  | .      | intergenic | .      | rs7923300 rs7870   | 2 |
| ACCT.AGGT   | 10 | 67260177 | 67260198 | 5.5     | .                  | .      | intergenic | -0.184 | rs790142788        | 2 |
| AAC.GTT     | 10 | 67803496 | 67803514 | 6.33333 | .                  | .      | intergenic | 0.959  | rs7924468 rs7918   | 2 |
| ACAT.ATGT   | 10 | 67929356 | 67929386 | 7.75    | .                  | .      | intergenic | .      | rs792488980        | 2 |
| AAAT.ATTT   | 10 | 68008222 | 68008236 | 3.75    | .                  | .      | intergenic | 0.451  | rs79304169 rs7932  | 2 |
| AAAC.GTTT   | 10 | 68193298 | 68193313 | 4       | .                  | .      | intergenic | 0.424  | rs787711089        | 2 |
| AAAG.CTTT   | 10 | 68206481 | 68206508 | 7       | .                  | .      | intergenic | .      | .                  | 2 |
| AAAG.CTTT   | 10 | 68302056 | 68302070 | 3.75    | .                  | .      | intergenic | 0.045  | rs787058390        | 3 |
| AC.GT       | 10 | 68330167 | 68330179 | 6.5     | .                  | .      | intergenic | 0.283  | .                  | 2 |
| AAAT.ATTT   | 10 | 68336632 | 68336647 | 4       | .                  | .      | intergenic | .      | rs790969819        | 2 |
| AAC.GTT     | 10 | 68416466 | 68416478 | 4.33333 | .                  | .      | intergenic | .      | .                  | 3 |
| AC.GT       | 10 | 68639189 | 68639216 | 14      | .                  | .      | intergenic | -0.045 | rs792102155 rs7923 | 6 |
| AT.AT       | 10 | 68782001 | 68782017 | 8.5     | .                  | .      | intergenic | 0.524  | .                  | 2 |
| AG.CT       | 10 | 68883534 | 68883546 | 6.5     | .                  | .      | intergenic | .      | .                  | 3 |
| AAAT.ATTT   | 10 | 68951816 | 68951830 | 3.75    | .                  | .      | intergenic | -0.036 | rs787374607        | 2 |
| AAAG.CTTT   | 10 | 68996931 | 68996953 | 5.75    | .                  | .      | intergenic | .      | rs79364384 rs7894  | 2 |
| AG.CT       | 10 | 69106337 | 69106353 | 8.5     | .                  | .      | intergenic | 0.31   | rs786736389        | 4 |
| AC.GT       | 10 | 69139759 | 69139771 | 6.5     | .                  | .      | intergenic | -0.077 | .                  | 4 |
| AC.GT       | 10 | 69229467 | 69229489 | 11.5    | .                  | .      | intergenic | 0.047  | .                  | 4 |
| AAAAC.GTTTT | 10 | 69232996 | 69233020 | 5       | .                  | .      | intergenic | 0.073  | rs7947801 rs7886   | 2 |
| AAAC.GTTT   | 10 | 69394781 | 69394798 | 4.5     | .                  | .      | intergenic | 0.296  | rs787423545        | 2 |



|               |    |          |          |         |                    |         |            |        |               |   |
|---------------|----|----------|----------|---------|--------------------|---------|------------|--------|---------------|---|
| AACT.AGTT     | 10 | 69430469 | 69430483 | 3.75    | .                  | .       | intergenic | -0.02  | 117687 rs7936 | 2 |
| AC.GT         | 10 | 69646208 | 69646219 | 6       | ENSSSCT00000012178 | TAF3    | intron     | -0.002 | rs791090906   | 2 |
| AAAC.GTTT     | 10 | 69759936 | 69759950 | 3.75    | .                  | .       | intergenic | -0.05  | rs789222515   | 2 |
| AAAAG.CTTTT   | 10 | 69779442 | 69779464 | 3.83333 | ENSSSCT00000012181 | .       | intron     | -0.004 | rs789232732   | 3 |
| AC.GT         | 10 | 69889437 | 69889447 | 5.5     | .                  | .       | intergenic | -0.155 | rs786962421   | 2 |
| AT.AT         | 10 | 69919784 | 69919794 | 5.5     | .                  | .       | intergenic | -0.064 | .             | 2 |
| AC.GT         | 10 | 70006509 | 70006520 | 6       | .                  | .       | intergenic | 0.82   | rs788105202   | 2 |
| AAAG.CTTT     | 10 | 70291679 | 70291694 | 4       | .                  | .       | intergenic | -0.136 | rs789849736   | 2 |
| AAG.CTT       | 10 | 70390471 | 70390488 | 6       | .                  | .       | intergenic | 0.431  | rs790943582   | 2 |
| AG.CT         | 10 | 70582338 | 70582348 | 5.5     | ENSSSCT00000012183 | PRKCQ   | intron     | .      | 765738 rs7865 | 4 |
| AAAC.GTTT     | 10 | 70824252 | 70824271 | 5       | .                  | .       | intergenic | -0.305 | 358095 rs7891 | 2 |
| AT.AT         | 10 | 70826704 | 70826718 | 7.5     | .                  | .       | intergenic | 0.128  | rs793280060   | 2 |
| AAAAC.GTTTT   | 10 | 70990863 | 70990887 | 5       | .                  | .       | intergenic | .      | rs787727998   | 2 |
| AC.GT         | 10 | 71470792 | 71470808 | 8.5     | .                  | .       | intergenic | 0.152  | rs790157304   | 3 |
| AAAC.GTTT     | 10 | 71700955 | 71700968 | 3.5     | .                  | .       | intergenic | .      | rs789310337   | 2 |
| AAAAC.GTTTT   | 10 | 72158058 | 72158076 | 3.8     | .                  | .       | intergenic | .      | .             | 2 |
| AAAAG.CTTTT   | 10 | 72206739 | 72206758 | 4       | .                  | .       | intergenic | 0.205  | 187674 rs7870 | 2 |
| AAAC.GTTT     | 10 | 72263403 | 72263422 | 5       | .                  | .       | intergenic | 0.292  | 315794 rs7937 | 2 |
| AAAT.ATTT     | 10 | 72272502 | 72272522 | 5.25    | .                  | .       | intergenic | -0.16  | rs786863476   | 2 |
| AAAC.GTTT     | 10 | 72446649 | 72446668 | 5       | .                  | .       | intergenic | 0.008  | .             | 3 |
| AC.GT         | 10 | 72935764 | 72935776 | 6.5     | .                  | .       | intergenic | .      | rs786588170   | 2 |
| AAAAAT.ATTTTT | 10 | 72972121 | 72972138 | 3       | .                  | .       | intergenic | -0.501 | rs793361411   | 2 |
| AC.GT         | 10 | 73123504 | 73123517 | 7       | .                  | .       | intergenic | -0.251 | rs793192092   | 2 |
| AC.GT         | 10 | 74091722 | 74091732 | 5.5     | .                  | .       | intergenic | -0.159 | 286392 rs7891 | 3 |
| AAAGC.GCTTT   | 10 | 74098179 | 74098202 | 4.8     | .                  | .       | intergenic | -0.114 | rs787337571   | 2 |
| AT.AT         | 10 | 74468600 | 74468610 | 5.5     | .                  | .       | intergenic | .      | rs789126447   | 2 |
| AG.CT         | 10 | 75274833 | 75274845 | 6.5     | ENSSSCT00000012222 | ADARB2  | intron     | -0.007 | 329966 rs7919 | 3 |
| AC.GT         | 10 | 75663532 | 75663542 | 5.5     | ENSSSCT00000012224 | LARP4B  | intron     | -0.197 | rs788506794   | 2 |
| AT.AT         | 10 | 75980130 | 75980145 | 8       | .                  | .       | intergenic | 0.152  | rs790993763   | 2 |
| AAG.CTT       | 10 | 76123979 | 76123990 | 4       | .                  | .       | intergenic | .      | rs786493516   | 2 |
| AAAAG.CTTTT   | 10 | 76234735 | 76234750 | 3.2     | ENSSSCT00000012228 | ZYMND11 | intron     | .      | rs788569249   | 2 |
| AAAT.ATTT     | 10 | 76304158 | 76304180 | 5.75    | ENSSSCT00000012228 | ZYMND11 | intron     | -0.233 | rs792192209   | 2 |
| AAAC.GTTT     | 10 | 76416463 | 76416485 | 5.75    | .                  | .       | intergenic | .      | rs793492560   | 2 |
| AT.AT         | 10 | 76603122 | 76603135 | 7       | .                  | .       | intergenic | .      | rs792796894   | 2 |
| AAG.CTT       | 10 | 76845150 | 76845168 | 6.33333 | .                  | .       | intergenic | .      | rs787378782   | 2 |
| AAAAC.GTTTT   | 10 | 76992808 | 76992830 | 3.83333 | .                  | .       | intergenic | -0.092 | 341328 rs7871 | 2 |
| AAAG.CTTT     | 10 | 77000415 | 77000433 | 4.75    | ENSSSCT00000012233 | CTSL    | intron     | 0.307  | 331463 rs7892 | 2 |
| AAAAC.GTTTT   | 10 | 77246982 | 77247005 | 4.8     | .                  | .       | intergenic | .      | 176478 rs7880 | 2 |
| AATG.CATT     | 10 | 77330262 | 77330278 | 4.25    | .                  | .       | intergenic | 0.186  | rs790105139   | 2 |
| AAAT.ATTT     | 10 | 77396937 | 77396954 | 4.5     | .                  | .       | intergenic | 0.073  | rs787882693   | 2 |
| AAAAT.ATTTT   | 10 | 77513083 | 77513099 | 3.4     | .                  | .       | intergenic | 0.243  | rs788604446   | 2 |
| AC.GT         | 10 | 77692029 | 77692045 | 8.5     | ENSSSCT00000023307 | OPTN    | intron     | -0.099 | 381484 rs7920 | 2 |
| AC.GT         | 10 | 78597958 | 78597971 | 7       | .                  | .       | intergenic | .      | rs787085042   | 3 |
| AGG.CCT       | 10 | 78604603 | 78604623 | 7       | ENSSSCT00000028985 | .       | exon       | .      | .             | 2 |
| AAC.GTT       | 11 | 48127    | 48142    | 5.33333 | ENSSSCT00000010149 | GULDH   | intron     | .      | rs791505587   | 2 |
| AC.GT         | 11 | 173765   | 173778   | 7       | ENSSSCT00000024896 | IL17D   | intron     | .      | .             | 2 |
| AC.GT         | 11 | 173765   | 173778   | 7       | ENSSSCT00000030327 | IL17D   | intron     | .      | .             | 2 |
| AAC.GTT       | 11 | 179545   | 179560   | 5.33333 | ENSSSCT00000024896 | IL17D   | intron     | .      | .             | 2 |
| AAC.GTT       | 11 | 179545   | 179560   | 5.33333 | ENSSSCT00000030327 | IL17D   | intron     | .      | .             | 2 |
| AAAAC.GTTTT   | 11 | 526787   | 526810   | 4.8     | .                  | .       | intergenic | 0.114  | 240979 rs7896 | 2 |
| AAGAG.CTCTT   | 11 | 629980   | 629997   | 3.6     | .                  | .       | intergenic | 0.315  | rs792550281   | 2 |
| AAAAT.ATTTT   | 11 | 713097   | 713117   | 4.2     | ENSSSCT00000010161 | FGF9    | intron     | 0.579  | rs792382611   | 2 |
| AAAT.ATTT     | 11 | 1161722  | 1161750  | 7.25    | .                  | .       | intergenic | 0.043  | rs792859607   | 2 |
| AAAC.GTTT     | 11 | 1220048  | 1220062  | 3.75    | .                  | .       | intergenic | -0.069 | rs791323010   | 2 |
| AAT.ATT       | 11 | 1287713  | 1287737  | 8.33333 | .                  | .       | intergenic | .      | 312886 rs7863 | 2 |
| AC.GT         | 11 | 2031634  | 2031647  | 7       | .                  | .       | intergenic | .      | rs787994511   | 4 |
| AC.GT         | 11 | 2074625  | 2074644  | 10      | ENSSSCT00000010177 | .       | intron     | .      | rs786953761   | 2 |
| AAC.GTT       | 11 | 2084873  | 2084889  | 5.66667 | ENSSSCT00000010177 | .       | intron     | .      | rs791918534   | 2 |
| AAACC.GGTTT   | 11 | 2454264  | 2454284  | 4.2     | .                  | .       | intergenic | -0.27  | rs787189329   | 2 |
| AAAAC.GTTTT   | 11 | 2728499  | 2728514  | 3.2     | .                  | .       | intergenic | -0.128 | rs790783683   | 2 |
| AC.GT         | 11 | 2839620  | 2839640  | 10.5    | ENSSSCT00000031012 | .       | intron     | -0.157 | rs788563464   | 4 |
| AAAC.GTTT     | 11 | 3082399  | 3082410  | 3       | .                  | .       | intergenic | -0.145 | 327783 rs7870 | 2 |
| AAAAT.ATTTT   | 11 | 3121848  | 3121865  | 3.6     | .                  | .       | intergenic | .      | rs786298174   | 2 |
| AT.AT         | 11 | 3606511  | 3606520  | 5       | .                  | .       | intergenic | .      | 328213 rs7866 | 2 |
| AC.GT         | 11 | 3717410  | 3717422  | 6.5     | .                  | .       | intergenic | 0.032  | 369621 rs7877 | 2 |
| AAAAC.GTTTT   | 11 | 3865911  | 3865940  | 6       | .                  | .       | intergenic | .      | rs786657393   | 2 |
| AAAC.GTTT     | 11 | 4073777  | 4073797  | 5.25    | .                  | .       | intergenic | -0.112 | rs690065995   | 2 |
| AAAG.CTTT     | 11 | 4240543  | 4240559  | 4.25    | .                  | .       | intergenic | -0.247 | rs786762049   | 2 |
| AAAC.GTTT     | 11 | 4542370  | 4542391  | 5.5     | .                  | .       | intergenic | .      | rs792330356   | 2 |
| AC.GT         | 11 | 5092717  | 5092727  | 5.5     | .                  | .       | intergenic | .      | rs788819692   | 2 |
| AC.GT         | 11 | 5335328  | 5335339  | 6       | ENSSSCT00000010212 | FLT1    | intron     | -0.119 | rs791393148   | 2 |
| AAAC.GTTT     | 11 | 5409527  | 5409545  | 4.75    | ENSSSCT00000010212 | FLT1    | intron     | 0.085  | rs791998111   | 2 |
| AGC.GCT       | 11 | 5497293  | 5497309  | 5.66667 | .                  | .       | intergenic | 0.212  | rs788173357   | 2 |
| AAAC.GTTT     | 11 | 5620441  | 5620459  | 4.75    | .                  | .       | intergenic | 0.039  | rs789381153   | 2 |
| AAAAC.GTTTT   | 11 | 5915402  | 5915422  | 4.2     | ENSSSCT00000024217 | .       | intron     | -0.078 | rs787130959   | 2 |
| AAAG.CTTT     | 11 | 5924888  | 5924900  | 3.25    | ENSSSCT00000024217 | .       | intron     | .      | 323595 rs7902 | 2 |
| AC.GT         | 11 | 6172173  | 6172187  | 7.5     | ENSSSCT00000029859 | MTUS2   | intron     | -0.186 | rs788825312   | 2 |
| AC.GT         | 11 | 6172173  | 6172187  | 7.5     | ENSSSCT00000010215 | MTUS2   | intron     | -0.186 | rs788825312   | 2 |
| AC.GT         | 11 | 6224898  | 6224910  | 6.5     | .                  | .       | intergenic | -0.027 | rs788871162   | 2 |
| AC.GT         | 11 | 6577039  | 6577052  | 7       | .                  | .       | intergenic | 0.423  | rs792182315   | 2 |
| AT.AT         | 11 | 6762968  | 6762984  | 8.5     | ENSSSCT00000010220 | KATNAL1 | intron     | 0.103  | rs790535074   | 2 |
| AC.GT         | 11 | 6813037  | 6813051  | 7.5     | .                  | .       | intergenic | 0.176  | .             | 3 |
| AC.GT         | 11 | 7113892  | 7113904  | 6.5     | .                  | .       | intergenic | .      | rs786795307   | 4 |
| AAAC.GTTT     | 11 | 7240921  | 7240947  | 6.75    | .                  | .       | intergenic | -0.2   | 140471 rs7928 | 3 |

|             |    |          |          |         |                    |         |            |        |        |               |   |
|-------------|----|----------|----------|---------|--------------------|---------|------------|--------|--------|---------------|---|
| AG.CT       | 11 | 7261798  | 7261810  | 6.5     | ENSSSCT00000010224 | ALOX5AP | intron     | -0.037 | 367292 | rs7912        | 3 |
| AAAT.ATTT   | 11 | 7265500  | 7265525  | 6.5     | ENSSSCT00000010224 | ALOX5AP | intron     | .      | .      | rs787577610   | 2 |
| AAT.ATT     | 11 | 7327657  | 7327668  | 4       | .                  | .       | intergenic | 0.152  | .      | .             | 2 |
| AAAAC.GTTTT | 11 | 7370972  | 7370994  | 3.83333 | .                  | .       | intergenic | -0.242 | .      | rs789092509   | 2 |
| AAAAC.GTTTT | 11 | 7761984  | 7762007  | 4.8     | .                  | .       | intergenic | 0.161  | .      | rs788713702   | 2 |
| AT.AT       | 11 | 7807629  | 7807641  | 6.5     | ENSSSCT00000010230 | B3GALTL | intron     | 0.371  | .      | rs793226828   | 2 |
| AT.AT       | 11 | 8386484  | 8386493  | 5       | .                  | .       | intergenic | .      | .      | rs790016370   | 2 |
| AC.GT       | 11 | 8495208  | 8495222  | 7.5     | ENSSSCT00000010234 | FRY     | intron     | 1.264  | .      | rs793092356   | 2 |
| AAAC.GTTT   | 11 | 8505761  | 8505780  | 5       | ENSSSCT00000010234 | FRY     | promoter   | 1.618  | .      | .             | 2 |
| AG.CT       | 11 | 8638241  | 8638257  | 8.5     | ENSSSCT00000032040 | .       | intron     | -0.042 | .      | 375220 rs7928 | 2 |
| AAAC.GTTT   | 11 | 8884963  | 8884986  | 6       | .                  | .       | intergenic | .      | .      | rs792037397   | 2 |
| AG.CT       | 11 | 9192876  | 9192886  | 5.5     | .                  | .       | intergenic | 0.059  | .      | 324280 rs7869 | 3 |
| AAG.CTT     | 11 | 9800493  | 9800514  | 7.33333 | .                  | .       | intergenic | 0.435  | .      | rs790766612   | 2 |
| AT.AT       | 11 | 9878160  | 9878170  | 5.5     | .                  | .       | intergenic | 0.073  | .      | rs788356695   | 3 |
| AAAG.CTTT   | 11 | 10123165 | 10123185 | 5.25    | ENSSSCT00000010246 | RFC3    | intron     | 0.003  | .      | 308077 rs7932 | 2 |
| AT.AT       | 11 | 10171645 | 10171662 | 9       | ENSSSCT00000010246 | RFC3    | intron     | .      | .      | .             | 2 |
| AC.GT       | 11 | 10303756 | 10303771 | 8       | .                  | .       | intergenic | -0.1   | .      | .             | 4 |
| AAAC.GTTT   | 11 | 10385783 | 10385801 | 4.75    | .                  | .       | intergenic | 0.1    | .      | 129296 rs7930 | 2 |
| ATC.GAT     | 11 | 10431280 | 10431295 | 5.33333 | .                  | .       | intergenic | 0.067  | .      | .             | 2 |
| AC.GT       | 11 | 10512727 | 10512737 | 5.5     | .                  | .       | intergenic | 0.035  | .      | rs789388232   | 2 |
| ACAT.ATGT   | 11 | 11028749 | 11028764 | 4       | .                  | .       | intergenic | 0.036  | .      | .             | 2 |
| AAC.GTT     | 11 | 11128046 | 11128059 | 4.66667 | .                  | .       | intergenic | -0.025 | .      | .             | 3 |
| AAC.GTT     | 11 | 11380132 | 11380145 | 4.66667 | .                  | .       | intergenic | 0.125  | .      | rs790500902   | 2 |
| AAAT.ATTT   | 11 | 11450710 | 11450728 | 4.75    | ENSSSCT00000010247 | .       | intron     | -0.104 | .      | rs786547237   | 2 |
| AAAAT.ATTTT | 11 | 11517590 | 11517608 | 3.8     | ENSSSCT00000010247 | .       | intron     | .      | .      | rs790064464   | 2 |
| AC.GT       | 11 | 11527631 | 11527643 | 6.5     | ENSSSCT00000010247 | .       | intron     | -0.155 | .      | rs787336372   | 2 |
| AAAT.ATTT   | 11 | 11558725 | 11558756 | 8       | ENSSSCT00000010247 | .       | intron     | -0.223 | .      | rs789870668   | 2 |
| AAAC.GTTT   | 11 | 11640659 | 11640673 | 3.75    | ENSSSCT00000010247 | .       | intron     | 0.448  | .      | rs787251379   | 2 |
| AAAAT.ATTTT | 11 | 12072180 | 12072197 | 3.6     | .                  | .       | intergenic | 0.101  | .      | rs789085784   | 2 |
| AC.GT       | 11 | 12333658 | 12333672 | 7.5     | .                  | .       | intergenic | -0.053 | .      | rs787914685   | 4 |
| AAAC.GTTT   | 11 | 12463676 | 12463694 | 4.75    | .                  | .       | intergenic | .      | .      | 194290 rs7888 | 3 |
| AAAC.GTTT   | 11 | 12530159 | 12530178 | 5       | .                  | .       | intergenic | 0.152  | .      | rs792622607   | 2 |
| AAAC.GTTT   | 11 | 12670543 | 12670565 | 5.75    | ENSSSCT00000010254 | SMAD9   | intron     | 0.057  | .      | 353914 rs7938 | 3 |
| AAG.CTT     | 11 | 12718804 | 12718817 | 4.66667 | .                  | .       | intergenic | 0.024  | .      | rs791623841   | 2 |
| AG.CT       | 11 | 12770068 | 12770080 | 6.5     | .                  | .       | intergenic | .      | .      | rs792815622   | 2 |
| AG.CT       | 11 | 12949265 | 12949278 | 7       | .                  | .       | intergenic | 0.214  | .      | rs791273572   | 2 |
| AAG.CTT     | 11 | 12977745 | 12977760 | 5.33333 | .                  | .       | intergenic | 0.132  | .      | .             | 2 |
| AC.GT       | 11 | 13272953 | 13272967 | 7.5     | .                  | .       | intergenic | -0.142 | .      | rs787500556   | 2 |
| AAAT.ATTT   | 11 | 13305521 | 13305540 | 5       | ENSSSCT00000010259 | TRPC4   | intron     | -0.129 | .      | rs789084227   | 4 |
| AC.GT       | 11 | 13429379 | 13429395 | 8.5     | ENSSSCT00000010259 | TRPC4   | intron     | 0.032  | .      | 115444 rs7916 | 3 |
| AC.GT       | 11 | 13473100 | 13473118 | 9.5     | ENSSSCT00000010259 | TRPC4   | intron     | .      | .      | rs696734017   | 2 |
| AT.AT       | 11 | 13618282 | 13618291 | 5       | .                  | .       | intergenic | -0.521 | .      | rs788121657   | 2 |
| AC.GT       | 11 | 13697316 | 13697325 | 5       | .                  | .       | intergenic | .      | .      | .             | 2 |
| AAAC.GTTT   | 11 | 13832392 | 13832406 | 3.75    | .                  | .       | intergenic | .      | .      | 794689 rs7926 | 2 |
| AAC.GTT     | 11 | 13856430 | 13856446 | 5.66667 | .                  | .       | intergenic | .      | .      | .             | 2 |
| AG.CT       | 11 | 13996940 | 13996972 | 16.5    | ENSSSCT00000010261 | FREM2   | promoter   | 0.004  | .      | rs708630237   | 2 |
| AAC.GTT     | 11 | 14108541 | 14108554 | 4.66667 | ENSSSCT00000010261 | FREM2   | intron     | 0.063  | .      | rs786551136   | 2 |
| AG.CT       | 11 | 14196016 | 14196030 | 7.5     | ENSSSCT00000010261 | FREM2   | intron     | -0.072 | .      | rs793509467   | 2 |
| AT.AT       | 11 | 14293417 | 14293444 | 14      | ENSSSCT00000010264 | .       | intron     | -0.082 | .      | rs789313544   | 2 |
| AT.AT       | 11 | 14293417 | 14293444 | 14      | ENSSSCT00000024776 | .       | intron     | -0.082 | .      | rs789313544   | 2 |
| AC.GT       | 11 | 14680800 | 14680812 | 6.5     | .                  | .       | intergenic | -0.092 | .      | 327918 rs7927 | 3 |
| AAACC.GTTT  | 11 | 14954957 | 14954971 | 3       | .                  | .       | intergenic | 0.135  | .      | 383008 rs7885 | 2 |
| AGG.CCT     | 11 | 14979844 | 14979859 | 5.33333 | .                  | .       | intergenic | 0.204  | .      | rs787098870   | 2 |
| AC.GT       | 11 | 15131694 | 15131705 | 6       | .                  | .       | intergenic | 0.076  | .      | .             | 2 |
| AAC.GTT     | 11 | 15358219 | 15358232 | 4.66667 | .                  | .       | intergenic | 0.146  | .      | rs792733912   | 2 |
| CACTC.GAGTG | 11 | 15492873 | 15492895 | 3.83333 | .                  | .       | intergenic | 0.092  | .      | rs788445609   | 2 |
| AC.GT       | 11 | 15544903 | 15544917 | 7.5     | ENSSSCT00000010267 | FOXO1   | 3'utr      | 1.03   | .      | 157116 rs7887 | 3 |
| AAAC.GTTT   | 11 | 15685085 | 15685107 | 5.75    | ENSSSCT00000010267 | FOXO1   | intron     | 0.18   | .      | 376749 rs7917 | 3 |
| AAAAC.GTTTT | 11 | 15892168 | 15892191 | 4.8     | ENSSSCT00000010271 | .       | intron     | -0.784 | .      | 320434 rs7901 | 2 |
| AT.AT       | 11 | 15901059 | 15901077 | 9.5     | .                  | .       | intergenic | -0.986 | .      | .             | 3 |
| AACC.GTTT   | 11 | 16093944 | 16093960 | 4.25    | .                  | .       | intergenic | .      | .      | rs789986051   | 2 |
| AC.GT       | 11 | 16133664 | 16133676 | 6.5     | ENSSSCT00000010277 | NEK5    | intron     | 0.048  | .      | 280659 rs7864 | 3 |
| AAAC.GTTT   | 11 | 16199636 | 16199650 | 3.75    | ENSSSCT00000010279 | ALG11   | intron     | 0.287  | .      | 746274 rs7875 | 2 |
| AAAAC.GTTTT | 11 | 16276011 | 16276034 | 4.8     | .                  | .       | intergenic | 0.111  | .      | rs696233964   | 2 |
| AT.AT       | 11 | 16338317 | 16338326 | 5       | .                  | .       | intergenic | .      | .      | rs788637544   | 3 |
| AG.CT       | 11 | 16384835 | 16384847 | 6.5     | .                  | .       | intergenic | -0.126 | .      | rs790796250   | 2 |
| AG.CT       | 11 | 16441365 | 16441374 | 5       | .                  | .       | intergenic | -0.058 | .      | .             | 2 |
| AAAC.GTTT   | 11 | 16450065 | 16450079 | 3.75    | .                  | .       | intergenic | 0.134  | .      | rs787115795   | 2 |
| AAAG.CTTT   | 11 | 16564139 | 16564168 | 7.5     | .                  | .       | intergenic | 0.271  | .      | .             | 2 |
| AC.GT       | 11 | 16684915 | 16684931 | 8.5     | .                  | .       | intergenic | 0.201  | .      | rs789649934   | 2 |
| AC.GT       | 11 | 16740223 | 16740233 | 5.5     | ENSSSCT00000010282 | INTS6   | intron     | 0.347  | .      | .             | 2 |
| AAAAG.CTTTT | 11 | 16758952 | 16758971 | 3.33333 | ENSSSCT00000010282 | INTS6   | intron     | 0.033  | .      | rs791808133   | 2 |
| AT.AT       | 11 | 16777069 | 16777078 | 5       | ENSSSCT00000010282 | INTS6   | intron     | 1.368  | .      | rs787718591   | 2 |
| AAAAC.GTTTT | 11 | 16896321 | 16896335 | 3       | .                  | .       | intergenic | .      | .      | rs793238884   | 2 |
| AAT.ATT     | 11 | 17124401 | 17124414 | 4.66667 | .                  | .       | intergenic | 0.297  | .      | rs791755326   | 2 |
| AC.GT       | 11 | 17232563 | 17232576 | 7       | .                  | .       | intergenic | 0.048  | .      | rs790302347   | 2 |
| AT.AT       | 11 | 18311367 | 18311380 | 7       | ENSSSCT00000010292 | EBPL    | intron     | 0.079  | .      | rs788887634   | 2 |
| AAC.GTT     | 11 | 18325102 | 18325118 | 5.66667 | ENSSSCT00000010292 | EBPL    | intron     | .      | .      | rs792964408   | 2 |
| AAAC.GTTT   | 11 | 18478741 | 18478755 | 3.75    | ENSSSCT00000023143 | RCBTB1  | intron     | -0.224 | .      | rs789709781   | 2 |
| AAAC.GTTT   | 11 | 18529356 | 18529378 | 5.75    | ENSSSCT00000010295 | PHF11   | intron     | 0.851  | .      | rs711546293   | 2 |
| AC.GT       | 11 | 18564081 | 18564097 | 8.5     | ENSSSCT00000010295 | PHF11   | intron     | 0.141  | .      | .             | 3 |
| AAC.GTT     | 11 | 18613504 | 18613522 | 6.33333 | .                  | .       | intergenic | -0.182 | .      | 719806 rs7904 | 2 |
| AAT.ATT     | 11 | 19000744 | 19000761 | 6       | ENSSSCT00000026092 | FND3A   | intron     | 0.187  | .      | rs791535583   | 2 |
| AG.CT       | 11 | 19089767 | 19089777 | 5.5     | ENSSSCT00000028831 | .       | intron     | .      | .      | rs790528832   | 3 |

|             |    |          |          |         |                    |         |            |        |               |   |
|-------------|----|----------|----------|---------|--------------------|---------|------------|--------|---------------|---|
| AAAC.GTTT   | 11 | 19114449 | 19114470 | 5.5     | ENSSSCT00000028831 | .       | intron     | .      | rs788346310   | 2 |
| AT.AT       | 11 | 19139264 | 19139274 | 5.5     | ENSSSCT00000028831 | .       | intron     | .      | 506124 rs7879 | 2 |
| AAAG.CTTT   | 11 | 19253226 | 19253239 | 3.5     | .                  | .       | intergenic | 0.721  | rs792397382   | 2 |
| AAAAC.GTTTT | 11 | 19853189 | 19853212 | 4.8     | ENSSSCT00000010302 | ITM2B   | intron     | 0.085  | 109866 rs7928 | 2 |
| AC.GT       | 11 | 20183804 | 20183814 | 5.5     | .                  | .       | intergenic | 0.057  | .             | 5 |
| AGC.GCT     | 11 | 20446227 | 20446238 | 4       | .                  | .       | intergenic | -0.072 | rs789013524   | 2 |
| AC.GT       | 11 | 20455025 | 20455053 | 14.5    | .                  | .       | intergenic | 0.035  | 399580 rs7913 | 3 |
| AC.GT       | 11 | 20640661 | 20640670 | 5       | .                  | .       | intergenic | -0.085 | .             | 3 |
| AT.AT       | 11 | 20749734 | 20749745 | 6       | .                  | .       | intergenic | .      | rs786823539   | 2 |
| AAAC.GTTT   | 11 | 21268858 | 21268877 | 5       | ENSSSCT00000010309 | LRCH1   | intron     | -0.03  | rs788881331   | 3 |
| AAAC.GTTT   | 11 | 21310697 | 21310715 | 4.75    | .                  | .       | intergenic | 0.415  | 757241 rs7870 | 2 |
| AAC.GTT     | 11 | 21468078 | 21468092 | 5       | .                  | .       | intergenic | .      | 389123 rs7930 | 2 |
| AAG.CTT     | 11 | 21469497 | 21469510 | 4.66667 | .                  | .       | intergenic | -0.089 | rs792867354   | 2 |
| AAAAT.ATTTT | 11 | 21484118 | 21484140 | 4.6     | .                  | .       | intergenic | 0.243  | 360002 rs7889 | 2 |
| AAAG.CTTT   | 11 | 21689334 | 21689348 | 3.75    | .                  | .       | intergenic | -0.003 | rs793141889   | 2 |
| AAAAG.CTTTT | 11 | 22082573 | 22082590 | 3.6     | .                  | .       | intergenic | 0.063  | rs791741317   | 2 |
| AAAC.GTTT   | 11 | 22337264 | 22337282 | 4.75    | .                  | .       | intergenic | .      | 376684 rs7881 | 2 |
| AC.GT       | 11 | 22337353 | 22337367 | 7.5     | .                  | .       | intergenic | .      | 343048 rs7934 | 5 |
| AAAT.ATTT   | 11 | 22461467 | 22461493 | 6.75    | .                  | .       | intergenic | .      | 203537 rs7868 | 2 |
| AAAAT.ATTTT | 11 | 22468046 | 22468078 | 6.6     | .                  | .       | intergenic | -0.082 | 329457 rs7873 | 2 |
| AGAT.ATCT   | 11 | 22509881 | 22509906 | 6.5     | .                  | .       | intergenic | 0.11   | rs789987469   | 2 |
| AAC.GTT     | 11 | 22660462 | 22660489 | 9.33333 | .                  | .       | intergenic | .      | rs788091861   | 2 |
| AAAC.GTTT   | 11 | 22768463 | 22768493 | 7.75    | .                  | .       | intergenic | 0.389  | .             | 2 |
| AT.AT       | 11 | 22806354 | 22806367 | 7       | .                  | .       | intergenic | .      | rs788749462   | 2 |
| AAAC.GTTT   | 11 | 23449346 | 23449364 | 4.75    | .                  | .       | intergenic | 0.075  | .             | 2 |
| AAAC.GTTT   | 11 | 23654817 | 23654839 | 5.75    | .                  | .       | intergenic | 0.129  | 112966 rs7923 | 2 |
| AAAT.ATTT   | 11 | 23755167 | 23755181 | 3.75    | .                  | .       | intergenic | 0.225  | rs789236549   | 2 |
| AATT.AATT   | 11 | 23785863 | 23785882 | 5       | .                  | .       | intergenic | .      | rs793537936   | 2 |
| AAAAT.ATTTT | 11 | 23903742 | 23903765 | 4.8     | .                  | .       | intergenic | -0.296 | rs788816977   | 2 |
| AC.GT       | 11 | 24147051 | 24147061 | 5.5     | .                  | .       | intergenic | 0.177  | rs792666490   | 2 |
| AG.CT       | 11 | 24473218 | 24473227 | 5       | ENSSSCT00000022928 | ENOX1   | intron     | .      | rs710177075   | 2 |
| AC.GT       | 11 | 24535137 | 24535147 | 5.5     | .                  | .       | intergenic | -0.142 | 344770 rs7908 | 3 |
| AG.CT       | 11 | 24541251 | 24541270 | 10      | .                  | .       | intergenic | -0.155 | rs793735416   | 2 |
| AAAT.ATTT   | 11 | 24554565 | 24554586 | 5.5     | .                  | .       | intergenic | 0.123  | rs792419758   | 3 |
| AAAAC.GTTTT | 11 | 24663852 | 24663870 | 3.8     | ENSSSCT00000010334 | DNAJC15 | intron     | 0.168  | rs788599592   | 2 |
| AAT.ATT     | 11 | 24830001 | 24830012 | 4       | .                  | .       | intergenic | .      | rs793261158   | 2 |
| AC.GT       | 11 | 24877976 | 24877986 | 5.5     | .                  | .       | intergenic | 0.009  | .             | 2 |
| AAT.ATT     | 11 | 25005858 | 25005870 | 4.33333 | .                  | .       | intergenic | 0.406  | rs793614763   | 2 |
| AAT.ATT     | 11 | 25247825 | 25247859 | 11.6667 | .                  | .       | intergenic | .      | rs790576500   | 2 |
| AAAT.ATTT   | 11 | 25274744 | 25274765 | 5.5     | .                  | .       | intergenic | 0.025  | 741642 rs7892 | 2 |
| AG.CT       | 11 | 25436112 | 25436124 | 6.5     | ENSSSCT00000010337 | AKAP11  | intron     | 0.229  | 382247 rs7885 | 2 |
| AG.CT       | 11 | 25914662 | 25914673 | 6       | ENSSSCT00000026550 | .       | intron     | 0.101  | rs787756192   | 2 |
| AC.GT       | 11 | 26101626 | 26101640 | 7.5     | ENSSSCT00000031457 | .       | intron     | 0.304  | rs791177682   | 2 |
| AC.GT       | 11 | 26185231 | 26185244 | 7       | .                  | .       | intergenic | 0.532  | rs793359705   | 2 |
| AAAC.GTTT   | 11 | 26225702 | 26225724 | 5.75    | .                  | .       | intergenic | .      | rs792635502   | 2 |
| AAC.GTT     | 11 | 26589647 | 26589660 | 4.66667 | ENSSSCT00000010343 | MTRF1   | intron     | 1.243  | 126583 rs7916 | 2 |
| AC.GT       | 11 | 26643171 | 26643215 | 22.5    | .                  | .       | intergenic | 0.977  | rs788493465   | 3 |
| AT.AT       | 11 | 26983119 | 26983134 | 8       | .                  | .       | intergenic | -0.035 | .             | 4 |
| AG.CT       | 11 | 27303606 | 27303616 | 5.5     | .                  | .       | intergenic | .      | rs790940477   | 3 |
| AAAC.GTTT   | 11 | 27397440 | 27397463 | 6       | .                  | .       | intergenic | 0.039  | rs693251157   | 2 |
| AC.GT       | 11 | 27747312 | 27747323 | 6       | .                  | .       | intergenic | 1.074  | 386571 rs7905 | 2 |
| AG.CT       | 11 | 27799677 | 27799716 | 20      | .                  | .       | intergenic | 0.007  | rs787464622   | 2 |
| AAAC.GTTT   | 11 | 27843783 | 27843803 | 5.25    | .                  | .       | intergenic | .      | rs791395234   | 2 |
| AGC.GCT     | 11 | 27855336 | 27855349 | 4.66667 | .                  | .       | intergenic | 0.117  | .             | 2 |
| AAAC.GTTT   | 11 | 28135635 | 28135651 | 4.25    | .                  | .       | intergenic | -0.005 | 346219 rs7935 | 4 |
| AT.AT       | 11 | 28341554 | 28341567 | 7       | .                  | .       | intergenic | .      | 339519 rs7874 | 2 |
| AAAAC.GTTTT | 11 | 28350372 | 28350390 | 3.16667 | .                  | .       | intergenic | -0.116 | rs789440481   | 2 |
| AC.GT       | 11 | 28467898 | 28467910 | 6.5     | .                  | .       | intergenic | 0.008  | rs788163006   | 3 |
| AC.GT       | 11 | 28518661 | 28518684 | 12      | .                  | .       | intergenic | .      | 334754 rs7917 | 2 |
| AAAC.GTTT   | 11 | 28546012 | 28546027 | 4       | .                  | .       | intergenic | 0.088  | rs793334926   | 2 |
| AT.AT       | 11 | 28565917 | 28565932 | 8       | .                  | .       | intergenic | -0.119 | 336808 rs7888 | 2 |
| AAAC.GTTT   | 11 | 28580062 | 28580076 | 3.75    | .                  | .       | intergenic | .      | rs786935309   | 2 |
| AAAG.CTTT   | 11 | 28792035 | 28792048 | 3.5     | .                  | .       | intergenic | -0.121 | rs709145132   | 2 |
| AAT.ATT     | 11 | 28809634 | 28809650 | 5.66667 | .                  | .       | intergenic | .      | 227700 rs7905 | 2 |
| AAAC.GTTT   | 11 | 28967218 | 28967251 | 8.5     | .                  | .       | intergenic | 0.059  | rs790728000   | 2 |
| AAAAC.GTTTT | 11 | 28988196 | 28988222 | 5.4     | .                  | .       | intergenic | -0.075 | rs791863553   | 3 |
| AAC.GTT     | 11 | 29091869 | 29091885 | 5.66667 | .                  | .       | intergenic | 1.44   | 251637 rs7872 | 2 |
| AT.AT       | 11 | 29104105 | 29104118 | 7       | .                  | .       | intergenic | .      | rs792251561   | 2 |
| AT.AT       | 11 | 29211050 | 29211067 | 9       | .                  | .       | intergenic | 0.017  | rs788655755   | 3 |
| AAAT.ATTT   | 11 | 29388288 | 29388310 | 5.75    | .                  | .       | intergenic | .      | 795049 rs7905 | 2 |
| AC.GT       | 11 | 29436202 | 29436213 | 6       | .                  | .       | intergenic | 0.169  | rs792688635   | 2 |
| AT.AT       | 11 | 29475683 | 29475693 | 5.5     | .                  | .       | intergenic | -0.245 | 390741 rs7905 | 2 |
| AT.AT       | 11 | 29572459 | 29572469 | 5.5     | .                  | .       | intergenic | 0.065  | rs793620402   | 2 |
| AAAC.GTTT   | 11 | 29575436 | 29575448 | 3.25    | .                  | .       | intergenic | -0.033 | rs792652355   | 2 |
| AAC.GTT     | 11 | 29614715 | 29614735 | 7       | .                  | .       | intergenic | 0.279  | rs790282037   | 2 |
| AC.GT       | 11 | 29635635 | 29635644 | 5       | .                  | .       | intergenic | -0.031 | rs792745543   | 3 |
| AC.GT       | 11 | 29668971 | 29668981 | 5.5     | .                  | .       | intergenic | -0.019 | rs788952389   | 2 |
| AT.AT       | 11 | 29712914 | 29712927 | 7       | .                  | .       | intergenic | 0.292  | .             | 5 |
| AAAT.ATTT   | 11 | 29816187 | 29816209 | 5.75    | .                  | .       | intergenic | .      | rs791466976   | 2 |
| AAAAC.GTTTT | 11 | 29964172 | 29964196 | 5       | .                  | .       | intergenic | .      | .             | 2 |
| AG.CT       | 11 | 30376827 | 30376844 | 9       | .                  | .       | intergenic | -0.179 | rs791092084   | 3 |
| AG.CT       | 11 | 30640523 | 30640537 | 7.5     | .                  | .       | intergenic | .      | rs792809471   | 2 |
| AAT.ATT     | 11 | 30679625 | 30679636 | 4       | .                  | .       | intergenic | .      | rs786472790   | 2 |
| AT.AT       | 11 | 30861001 | 30861013 | 6.5     | .                  | .       | intergenic | .      | 789015 rs7918 | 2 |

|              |    |          |          |         |                    |       |            |        |                 |   |
|--------------|----|----------|----------|---------|--------------------|-------|------------|--------|-----------------|---|
| AAAT.ATTT    | 11 | 30969266 | 30969285 | 5       | .                  | .     | intergenic | -0.047 | .               | 2 |
| AT.AT        | 11 | 31292577 | 31292595 | 9.5     | .                  | .     | intergenic | 0.051  | .               | 2 |
| AGGGG.CCCCT  | 11 | 31514450 | 31514466 | 3.4     | .                  | .     | intergenic | .      | .               | 2 |
| AC.GT        | 11 | 31691283 | 31691297 | 7.5     | .                  | .     | intergenic | -0.063 | .               | 2 |
| AAT.ATT      | 11 | 31955490 | 31955509 | 6.66667 | .                  | .     | intergenic | .      | 182780 rs7937   | 2 |
| AAAAG.CTTTT  | 11 | 32344667 | 32344688 | 4.4     | .                  | .     | intergenic | -0.111 | rs789114717     | 2 |
| AC.GT        | 11 | 32435281 | 32435301 | 10.5    | .                  | .     | intergenic | .      | 108267 rs7915   | 2 |
| AAG.CTT      | 11 | 32567683 | 32567697 | 5       | .                  | .     | intergenic | .      | rs792108250     | 3 |
| AC.GT        | 11 | 32722876 | 32722891 | 8       | .                  | .     | intergenic | 0.043  | rs788594733     | 2 |
| AAC.GTT      | 11 | 33185590 | 33185603 | 4.66667 | .                  | .     | intergenic | -0.029 | rs787864838     | 3 |
| AAAAC.GTTTT  | 11 | 33548942 | 33548970 | 5.8     | .                  | .     | intergenic | -0.05  | rs85462 rs7862  | 2 |
| AC.GT        | 11 | 34495438 | 34495462 | 12.5    | .                  | .     | intergenic | -0.275 | rs787504577     | 2 |
| AC.GT        | 11 | 34576472 | 34576486 | 7.5     | .                  | .     | intergenic | -0.179 | rs792083088     | 2 |
| AT.AT        | 11 | 34658097 | 34658112 | 8       | ENSSSCT00000010357 | .     | intron     | 0.003  | rs793469890     | 2 |
| AATG.CATT    | 11 | 34769824 | 34769848 | 6.25    | .                  | .     | intergenic | 0.077  | rs22008 rs7894  | 2 |
| AC.GT        | 11 | 34817022 | 34817031 | 5       | .                  | .     | intergenic | 0.49   | rs791821248     | 2 |
| AAT.ATT      | 11 | 34964720 | 34964733 | 4.66667 | .                  | .     | intergenic | 0.166  | rs257744 rs7915 | 2 |
| AAAG.CTTT    | 11 | 34972418 | 34972432 | 3.75    | .                  | .     | intergenic | -0.014 | rs791606493     | 2 |
| AAAC.GTTT    | 11 | 34978823 | 34978842 | 5       | .                  | .     | intergenic | .      | rs792404293     | 2 |
| AC.GT        | 11 | 35011621 | 35011634 | 7       | ENSSSCT00000010359 | .     | intron     | .      | rs301514 rs7867 | 4 |
| AC.GT        | 11 | 35510234 | 35510262 | 14.5    | .                  | .     | intergenic | 0.217  | rs543058 rs7921 | 4 |
| AAAC.GTTT    | 11 | 35518972 | 35518995 | 6       | .                  | .     | intergenic | 0.224  | rs786229412     | 3 |
| ATAT.ATAT    | 11 | 35809341 | 35809382 | 10.5    | .                  | .     | intergenic | 0.172  | rs790830185     | 2 |
| ACAT.ATGT    | 11 | 35900093 | 35900107 | 3.75    | .                  | .     | intergenic | -0.245 | .               | 2 |
| AT.AT        | 11 | 36016472 | 36016481 | 5       | .                  | .     | intergenic | .      | rs793502107     | 2 |
| AG.CT        | 11 | 36029218 | 36029232 | 7.5     | .                  | .     | intergenic | .      | rs691576979     | 2 |
| AT.AT        | 11 | 36179750 | 36179761 | 6       | .                  | .     | intergenic | .      | rs789547208     | 2 |
| AC.GT        | 11 | 36605840 | 36605872 | 16.5    | .                  | .     | intergenic | 0.088  | rs212166 rs7913 | 3 |
| AAAC.GTTT    | 11 | 37129483 | 37129506 | 6       | .                  | .     | intergenic | 1.031  | rs396007 rs7887 | 2 |
| AAATAT.ATATT | 11 | 37367079 | 37367104 | 4.33333 | .                  | .     | intergenic | .      | .               | 2 |
| AGAT.ATCT    | 11 | 37975459 | 37975479 | 5.25    | .                  | .     | intergenic | -0.1   | rs311169 rs7878 | 2 |
| AT.AT        | 11 | 38284630 | 38284652 | 11.5    | .                  | .     | intergenic | .      | rs787350232     | 2 |
| AAAAC.GTTTT  | 11 | 38495732 | 38495750 | 3.8     | .                  | .     | intergenic | .      | rs127205 rs7911 | 2 |
| AGAT.ATCT    | 11 | 38583636 | 38583672 | 9.25    | .                  | .     | intergenic | 0.568  | .               | 2 |
| AT.AT        | 11 | 38996381 | 38996396 | 8       | .                  | .     | intergenic | -0.306 | rs788231268     | 3 |
| AAG.CTT      | 11 | 39582532 | 39582548 | 5.66667 | .                  | .     | intergenic | 0.128  | rs791639838     | 2 |
| AAAT.ATTT    | 11 | 39741814 | 39741829 | 4       | .                  | .     | intergenic | .      | rs788040796     | 2 |
| AAAT.ATTT    | 11 | 39844699 | 39844733 | 8.75    | .                  | .     | intergenic | .      | rs698100049     | 2 |
| AT.AT        | 11 | 39909345 | 39909357 | 6.5     | .                  | .     | intergenic | .      | .               | 2 |
| AAAC.GTTT    | 11 | 40122611 | 40122625 | 3.75    | .                  | .     | intergenic | .      | .               | 4 |
| AG.CT        | 11 | 40599107 | 40599121 | 7.5     | .                  | .     | intergenic | -0.315 | rs792043943     | 2 |
| AAAAT.ATTTT  | 11 | 40749454 | 40749477 | 4.8     | .                  | .     | intergenic | .      | rs387226 rs7866 | 2 |
| AAAC.GTTT    | 11 | 40989959 | 40989980 | 5.5     | .                  | .     | intergenic | .      | rs356349 rs7913 | 2 |
| AAT.ATT      | 11 | 41048767 | 41048781 | 5       | .                  | .     | intergenic | 0.084  | .               | 2 |
| AG.CT        | 11 | 41139631 | 41139642 | 6       | .                  | .     | intergenic | -0.068 | .               | 2 |
| AT.AT        | 11 | 41184854 | 41184872 | 9.5     | .                  | .     | intergenic | .      | rs166002 rs7932 | 2 |
| AT.AT        | 11 | 41606341 | 41606351 | 5.5     | .                  | .     | intergenic | -0.065 | rs793638147     | 4 |
| AAAT.ATTT    | 11 | 41737912 | 41737926 | 3.75    | .                  | .     | intergenic | -0.105 | rs788686791     | 2 |
| AC.GT        | 11 | 41765641 | 41765653 | 6.5     | .                  | .     | intergenic | .      | .               | 3 |
| AAAAT.ATTTT  | 11 | 41891818 | 41891846 | 5.8     | .                  | .     | intergenic | -0.031 | rs791500176     | 2 |
| AT.AT        | 11 | 42068362 | 42068385 | 12      | .                  | .     | intergenic | 0.029  | rs792871787     | 2 |
| AATAC.GTATT  | 11 | 43094348 | 43094365 | 3.6     | .                  | .     | intergenic | 0.714  | rs789114243     | 2 |
| AT.AT        | 11 | 43252442 | 43252458 | 8.5     | .                  | .     | intergenic | .      | .               | 3 |
| AAC.GTT      | 11 | 43407566 | 43407582 | 5.66667 | .                  | .     | intergenic | 0.337  | .               | 2 |
| AAT.ATT      | 11 | 43420842 | 43420855 | 4.66667 | .                  | .     | intergenic | -0.071 | rs787352257     | 2 |
| ATC.GAT      | 11 | 43452068 | 43452087 | 6.66667 | .                  | .     | intergenic | 0.192  | .               | 2 |
| AGG.CCT      | 11 | 43490723 | 43490735 | 4.33333 | .                  | .     | intergenic | 0.411  | rs306342 rs7892 | 2 |
| AAAC.GTTT    | 11 | 43558387 | 43558419 | 8.25    | .                  | .     | intergenic | .      | rs354101 rs7895 | 2 |
| AAAG.CTTT    | 11 | 43585769 | 43585781 | 3.25    | .                  | .     | intergenic | -0.02  | rs740128 rs7862 | 2 |
| AT.AT        | 11 | 43886811 | 43886825 | 7.5     | .                  | .     | intergenic | .      | .               | 2 |
| AT.AT        | 11 | 43975755 | 43975776 | 11      | .                  | .     | intergenic | -0.165 | rs180922 rs7874 | 2 |
| AC.GT        | 11 | 44041750 | 44041769 | 10      | .                  | .     | intergenic | -0.043 | rs703129254     | 4 |
| AAAAAT.ATTTT | 11 | 44175417 | 44175439 | 3.83333 | .                  | .     | intergenic | .      | .               | 2 |
| AATAT.ATATT  | 11 | 44401061 | 44401077 | 3.4     | .                  | .     | intergenic | 0.096  | .               | 2 |
| AAAAAC.GTTTT | 11 | 45005977 | 45006005 | 4.83333 | .                  | .     | intergenic | -0.055 | rs791573445     | 2 |
| AC.GT        | 11 | 45042696 | 45042709 | 7       | .                  | .     | intergenic | -0.014 | rs345889 rs7885 | 2 |
| AAAT.ATTT    | 11 | 45054624 | 45054659 | 9       | .                  | .     | intergenic | .      | rs788414690     | 2 |
| AAAC.GTTT    | 11 | 45554345 | 45554367 | 5.75    | .                  | .     | intergenic | -0.426 | rs790907355     | 2 |
| AAC.GTT      | 11 | 45627809 | 45627828 | 6.66667 | .                  | .     | intergenic | .      | rs737671 rs7871 | 3 |
| AAAC.GTTT    | 11 | 45643444 | 45643460 | 4.25    | .                  | .     | intergenic | -0.004 | rs386492 rs7863 | 3 |
| AG.CT        | 11 | 46116611 | 46116621 | 5.5     | .                  | .     | intergenic | 0.104  | rs787909042     | 3 |
| AAAAC.GTTTT  | 11 | 46141477 | 46141508 | 6.4     | .                  | .     | intergenic | -0.059 | rs792684620     | 2 |
| AG.CT        | 11 | 46149492 | 46149508 | 8.5     | .                  | .     | intergenic | .      | rs334297 rs7932 | 4 |
| AT.AT        | 11 | 46221614 | 46221636 | 11.5    | .                  | .     | intergenic | -0.103 | rs252566 rs7920 | 2 |
| ATCC.GGAT    | 11 | 46268482 | 46268524 | 10.75   | ENSSSCT00000010366 | KLHL1 | intron     | -0.177 | .               | 2 |
| ACT.AGT      | 11 | 46287713 | 46287733 | 7       | ENSSSCT00000010366 | KLHL1 | intron     | 0.036  | rs793674111     | 2 |
| AATT.AATT    | 11 | 46293142 | 46293154 | 3.25    | ENSSSCT00000010366 | KLHL1 | intron     | 0.069  | rs160961 rs7887 | 2 |
| AAC.GTT      | 11 | 46463108 | 46463121 | 4.66667 | ENSSSCT00000010366 | KLHL1 | intron     | -0.144 | rs792991936     | 2 |
| AAAC.GTTT    | 11 | 46553538 | 46553562 | 6.25    | .                  | .     | intergenic | .      | rs791298226     | 2 |
| AAT.ATT      | 11 | 46672825 | 46672842 | 6       | .                  | .     | intergenic | -0.116 | rs792431749     | 2 |
| AG.CT        | 11 | 46734785 | 46734796 | 6       | .                  | .     | intergenic | .      | rs787390780     | 2 |
| AAAAT.ATTTT  | 11 | 46777723 | 46777742 | 4       | .                  | .     | intergenic | -0.108 | rs787883830     | 2 |
| AAAT.ATTT    | 11 | 47215934 | 47215956 | 5.75    | .                  | .     | intergenic | .      | rs206494 rs7886 | 2 |
| AAAAC.GTTTT  | 11 | 47548665 | 47548691 | 5.4     | .                  | .     | intergenic | .      | rs396341 rs7866 | 2 |

|             |    |          |          |         |                    |        |            |        |               |   |
|-------------|----|----------|----------|---------|--------------------|--------|------------|--------|---------------|---|
| AT.AT       | 11 | 47619016 | 47619034 | 9.5     | .                  | .      | intergenic | -0.094 | .             | 4 |
| AT.AT       | 11 | 47688815 | 47688839 | 12.5    | .                  | .      | intergenic | 0.465  | 358123 rs7916 | 3 |
| AG.CT       | 11 | 48334572 | 48334582 | 5.5     | ENSSSCT00000010367 | .      | intron     | 0.126  | .             | 2 |
| AAC.GTT     | 11 | 48357999 | 48358019 | 7       | ENSSSCT00000010367 | .      | intron     | 0.225  | 310035 rs7927 | 4 |
| AC.GT       | 11 | 48470428 | 48470440 | 6.5     | ENSSSCT00000010367 | .      | intron     | 0.158  | 319428 rs7882 | 3 |
| AAAC.GTTT   | 11 | 48641735 | 48641750 | 4       | .                  | .      | intergenic | 0.105  | 336576 rs7925 | 2 |
| ATC.GAT     | 11 | 48701428 | 48701443 | 5.33333 | .                  | .      | intergenic | 0.03   | 336282 rs7866 | 2 |
| AAAG.CTTT   | 11 | 48847621 | 48847649 | 7.25    | .                  | .      | intergenic | 0.184  | 396798 rs7913 | 2 |
| AAC.GTT     | 11 | 49058300 | 49058314 | 5       | .                  | .      | intergenic | .      | rs789915022   | 2 |
| AT.AT       | 11 | 49331813 | 49331842 | 15      | .                  | .      | intergenic | 0.12   | rs791672511   | 2 |
| AAAC.GTTT   | 11 | 49545561 | 49545575 | 3.75    | .                  | .      | intergenic | .      | rs791290065   | 3 |
| AC.GT       | 11 | 49605902 | 49605918 | 8.5     | ENSSSCT00000010370 | DIS3   | intron     | 0.245  | 366436 rs7872 | 2 |
| AC.GT       | 11 | 49707438 | 49707449 | 6       | ENSSSCT00000025113 | .      | intron     | 0.074  | rs792514803   | 2 |
| AACC.GGTT   | 11 | 49952386 | 49952420 | 8.75    | .                  | .      | intergenic | 0.35   | 340418 rs7866 | 2 |
| AAG.CTT     | 11 | 50012522 | 50012533 | 4       | .                  | .      | intergenic | .      | .             | 4 |
| AG.CT       | 11 | 50033239 | 50033251 | 6.5     | ENSSSCT00000010373 | KLF5   | promoter   | -0.447 | 383083 rs7917 | 2 |
| AG.CT       | 11 | 50310928 | 50310943 | 8       | .                  | .      | intergenic | 0.126  | rs792201362   | 2 |
| AC.GT       | 11 | 50414537 | 50414548 | 6       | .                  | .      | intergenic | .      | .             | 3 |
| AAC.GTT     | 11 | 50476785 | 50476804 | 6.66667 | .                  | .      | intergenic | 0.162  | rs789454701   | 2 |
| AT.AT       | 11 | 50597519 | 50597544 | 13      | .                  | .      | intergenic | -0.048 | .             | 2 |
| AAAC.GTTT   | 11 | 50597680 | 50597692 | 3.25    | .                  | .      | intergenic | 0.004  | .             | 2 |
| AC.GT       | 11 | 50708521 | 50708530 | 5       | .                  | .      | intergenic | -0.101 | rs786476259   | 2 |
| AAAC.GTTT   | 11 | 50999526 | 50999544 | 4.75    | .                  | .      | intergenic | 0.003  | rs789037479   | 2 |
| AAAT.ATTT   | 11 | 51214738 | 51214752 | 3.75    | .                  | .      | intergenic | 0.442  | rs790146137   | 2 |
| ATC.GAT     | 11 | 51247168 | 51247180 | 4.33333 | .                  | .      | intergenic | 0.135  | rs791451231   | 2 |
| AC.GT       | 11 | 51325981 | 51325991 | 5.5     | .                  | .      | intergenic | 1.054  | rs693516300   | 2 |
| AAC.GTT     | 11 | 51456482 | 51456496 | 5       | .                  | .      | intergenic | .      | .             | 2 |
| AAT.ATT     | 11 | 51700830 | 51700843 | 4.66667 | .                  | .      | intergenic | .      | rs788659090   | 2 |
| AT.AT       | 11 | 51717635 | 51717645 | 5.5     | .                  | .      | intergenic | 0.859  | 297748 rs7868 | 3 |
| AAAT.ATTT   | 11 | 51795711 | 51795738 | 7       | .                  | .      | intergenic | 0.262  | rs789639136   | 2 |
| AAC.GTT     | 11 | 51854588 | 51854599 | 4       | .                  | .      | intergenic | .      | .             | 2 |
| AAC.GTT     | 11 | 51893871 | 51893887 | 5.66667 | .                  | .      | intergenic | .      | rs791205663   | 3 |
| AAAC.GTTT   | 11 | 52026323 | 52026355 | 8.25    | .                  | .      | intergenic | 0.302  | rs792280597   | 2 |
| AC.GT       | 11 | 52111800 | 52111809 | 5       | .                  | .      | intergenic | 0.046  | rs790249605   | 2 |
| AT.AT       | 11 | 52161404 | 52161426 | 11.5    | ENSSSCT00000010376 | .      | 3'utr      | 1.223  | rs788854435   | 2 |
| AAC.GTT     | 11 | 52303351 | 52303366 | 5.33333 | .                  | .      | intergenic | 0.178  | rs787407054   | 3 |
| AAC.GTT     | 11 | 52443163 | 52443185 | 7.66667 | ENSSSCT00000010377 | UCHL3  | intron     | 0.994  | rs788554344   | 3 |
| AC.GT       | 11 | 52452549 | 52452558 | 5       | ENSSSCT00000010377 | UCHL3  | intron     | 0.161  | 381217 rs7930 | 2 |
| AAAT.ATTT   | 11 | 52522101 | 52522117 | 4.25    | .                  | .      | intergenic | 0.225  | rs792502294   | 2 |
| AGC.GCT     | 11 | 52803192 | 52803204 | 4.33333 | .                  | .      | intergenic | 0.058  | rs791454439   | 2 |
| AC.GT       | 11 | 52834914 | 52834928 | 7.5     | .                  | .      | intergenic | -0.046 | .             | 4 |
| AAAAT.ATTTT | 11 | 52886072 | 52886096 | 5       | .                  | .      | intergenic | 0.038  | .             | 2 |
| AAAT.ATTT   | 11 | 52931932 | 52931943 | 6       | .                  | .      | intergenic | -0.137 | rs786357461   | 3 |
| AAAAC.GTTT  | 11 | 53042330 | 53042345 | 3.2     | .                  | .      | intergenic | -0.036 | rs786937544   | 2 |
| AAGG.CCTT   | 11 | 53105710 | 53105740 | 7.75    | .                  | .      | intergenic | 0.127  | rs787443944   | 2 |
| AC.GT       | 11 | 53197847 | 53197856 | 5       | .                  | .      | intergenic | 0.008  | .             | 3 |
| AAAT.ATTT   | 11 | 53202335 | 53202357 | 5.75    | .                  | .      | intergenic | 0.165  | rs787320216   | 2 |
| AT.AT       | 11 | 53369470 | 53369482 | 6.5     | .                  | .      | intergenic | 0.092  | rs786717608   | 2 |
| AC.GT       | 11 | 53589105 | 53589124 | 10      | .                  | .      | intergenic | 0.188  | 290420 rs7869 | 2 |
| AAAT.ATTT   | 11 | 53611573 | 53611605 | 8.25    | .                  | .      | intergenic | .      | rs786477143   | 2 |
| AG.CT       | 11 | 53635741 | 53635769 | 14.5    | .                  | .      | intergenic | 0.098  | rs793689260   | 3 |
| AG.CT       | 11 | 53718369 | 53718383 | 7.5     | ENSSSCT00000010382 | .      | intron     | 0.066  | rs789601831   | 2 |
| AAAT.ATTT   | 11 | 53822698 | 53822725 | 7       | ENSSSCT00000010386 | MYCBP2 | intron     | 3.303  | rs788500524   | 2 |
| AACC.GGTT   | 11 | 53846986 | 53847007 | 5.5     | ENSSSCT00000010386 | MYCBP2 | intron     | 0.182  | .             | 2 |
| AAC.GTT     | 11 | 54142031 | 54142048 | 6       | .                  | .      | intergenic | 0.229  | rs791807607   | 2 |
| AAAC.GTTT   | 11 | 54157089 | 54157101 | 3.25    | .                  | .      | intergenic | .      | rs792531550   | 3 |
| AATG.CATT   | 11 | 54211064 | 54211083 | 5       | .                  | .      | intergenic | -0.024 | 309688 rs7889 | 2 |
| AT.AT       | 11 | 54259468 | 54259478 | 5.5     | .                  | .      | intergenic | -0.012 | rs791600090   | 2 |
| AAAC.GTTT   | 11 | 54260098 | 54260117 | 5       | .                  | .      | intergenic | 0.014  | 163856 rs7928 | 2 |
| AAAC.GTTT   | 11 | 54295849 | 54295863 | 3.75    | .                  | .      | intergenic | -0.105 | rs789180678   | 2 |
| AG.CT       | 11 | 54305366 | 54305376 | 5.5     | ENSSSCT00000010387 | SCEL   | promoter   | 0.189  | rs791294894   | 3 |
| AAAGG.CTTT  | 11 | 54312315 | 54312335 | 3.5     | ENSSSCT00000010387 | SCEL   | intron     | 0.044  | 306143 rs7933 | 2 |
| AAAT.ATTT   | 11 | 54585047 | 54585066 | 5       | .                  | .      | intergenic | .      | 359178 rs7923 | 2 |
| AG.CT       | 11 | 54598648 | 54598658 | 5.5     | .                  | .      | intergenic | 0.097  | rs791961709   | 4 |
| AC.GT       | 11 | 54675583 | 54675593 | 5.5     | .                  | .      | intergenic | .      | rs790811785   | 2 |
| AAAAT.ATTTT | 11 | 54707881 | 54707905 | 5       | ENSSSCT00000010390 | EDNRB  | intron     | 0.011  | rs793728456   | 2 |
| AATT.AATT   | 11 | 54714515 | 54714535 | 5.25    | ENSSSCT00000010390 | EDNRB  | intron     | 0.253  | rs787308011   | 2 |
| AAAT.ATTT   | 11 | 54876345 | 54876364 | 5       | .                  | .      | intergenic | 0.104  | rs787373665   | 2 |
| AC.GT       | 11 | 54996153 | 54996163 | 5.5     | .                  | .      | intergenic | 0.52   | 362625 rs7879 | 4 |
| AC.GT       | 11 | 54998951 | 54998963 | 6.5     | .                  | .      | intergenic | .      | .             | 3 |
| AAC.GTT     | 11 | 55094415 | 55094435 | 7       | .                  | .      | intergenic | 0.015  | rs711970894   | 4 |
| AAAC.GTTT   | 11 | 55222290 | 55222308 | 4.75    | .                  | .      | intergenic | 0.068  | rs793672930   | 2 |
| AAAG.CTTT   | 11 | 55245598 | 55245612 | 3.75    | .                  | .      | intergenic | 0.031  | .             | 2 |
| AAAC.GTTT   | 11 | 55248945 | 55248963 | 4.75    | .                  | .      | intergenic | 0.27   | rs789503557   | 2 |
| AAAG.CTTT   | 11 | 55506610 | 55506623 | 3.5     | .                  | .      | intergenic | 0.15   | rs790021609   | 2 |
| AT.AT       | 11 | 55964566 | 55964576 | 5.5     | .                  | .      | intergenic | .      | rs788370548   | 3 |
| AAAC.GTTT   | 11 | 56228851 | 56228869 | 4.75    | .                  | .      | intergenic | .      | rs793509576   | 2 |
| AAAAT.ATTTT | 11 | 56397614 | 56397634 | 4.2     | .                  | .      | intergenic | .      | 333393 rs7916 | 2 |
| AAAC.GTTT   | 11 | 56730133 | 56730147 | 3.75    | .                  | .      | intergenic | 0.324  | rs788545978   | 2 |
| AT.AT       | 11 | 57088580 | 57088604 | 12.5    | .                  | .      | intergenic | -0.382 | rs789107174   | 2 |
| AAAC.GTTT   | 11 | 57315026 | 57315048 | 5.75    | .                  | .      | intergenic | 0.105  | 245168 rs7930 | 2 |
| AC.GT       | 11 | 57949716 | 57949733 | 9       | .                  | .      | intergenic | .      | rs786316012   | 2 |
| AAT.ATT     | 11 | 57993939 | 57993954 | 5.33333 | .                  | .      | intergenic | 0.016  | rs787313452   | 2 |
| AAAC.GTTT   | 11 | 58121424 | 58121440 | 4.25    | .                  | .      | intergenic | .      | 307428 rs7898 | 2 |

|             |    |          |          |         |                    |        |            |        |               |   |
|-------------|----|----------|----------|---------|--------------------|--------|------------|--------|---------------|---|
| AT.AT       | 11 | 58121878 | 58121911 | 17      | .                  | .      | intergenic | 0.196  | 314409 rs7877 | 2 |
| AAAT.ATTT   | 11 | 58349296 | 58349322 | 6.75    | .                  | .      | intergenic | -0.113 | rs789532993   | 2 |
| AC.GT       | 11 | 58606794 | 58606806 | 6.5     | .                  | .      | intergenic | 0.08   | .             | 3 |
| AC.GT       | 11 | 58673662 | 58673693 | 16      | .                  | .      | intergenic | .      | 356959 rs7925 | 4 |
| ACAT.ATGT   | 11 | 58757785 | 58757800 | 4       | .                  | .      | intergenic | -0.151 | rs791184979   | 2 |
| AC.GT       | 11 | 58784694 | 58784707 | 7       | .                  | .      | intergenic | .      | rs691559367   | 4 |
| AC.GT       | 11 | 58908779 | 58908790 | 6       | .                  | .      | intergenic | -0.192 | rs786845773   | 4 |
| ACAT.ATGT   | 11 | 59027556 | 59027571 | 4       | .                  | .      | intergenic | .      | rs788360019   | 3 |
| AC.GT       | 11 | 59107172 | 59107190 | 9.5     | .                  | .      | intergenic | .      | 30628 rs7903  | 2 |
| ACAT.ATGT   | 11 | 59239166 | 59239178 | 3.25    | .                  | .      | intergenic | .      | rs788779542   | 2 |
| AC.GT       | 11 | 59742691 | 59742703 | 6.5     | .                  | .      | intergenic | .      | rs789374600   | 2 |
| AAT.ATT     | 11 | 59865388 | 59865418 | 10.3333 | .                  | .      | intergenic | 0.075  | 353318 rs7908 | 2 |
| AAAAC.GTTTT | 11 | 59880261 | 59880283 | 3.83333 | .                  | .      | intergenic | .      | .             | 2 |
| AAC.GTT     | 11 | 59881878 | 59881892 | 5       | .                  | .      | intergenic | .      | .             | 2 |
| AAC.GTT     | 11 | 59914265 | 59914279 | 5       | .                  | .      | intergenic | .      | rs788778989   | 3 |
| AGAT.ATCT   | 11 | 60002283 | 60002303 | 5.25    | .                  | .      | intergenic | 0.046  | 197159 rs7934 | 2 |
| AT.AT       | 11 | 60071584 | 60071604 | 10.5    | .                  | .      | intergenic | .      | rs789108428   | 2 |
| AGAT.ATATC  | 11 | 60273524 | 60273546 | 3.83333 | .                  | .      | intergenic | .      | 265274 rs7924 | 2 |
| AAT.ATT     | 11 | 60290366 | 60290383 | 6       | .                  | .      | intergenic | -0.093 | rs789915760   | 3 |
| AC.GT       | 11 | 60954777 | 60954790 | 7       | .                  | .      | intergenic | -0.043 | rs786947221   | 2 |
| AC.GT       | 11 | 61009553 | 61009572 | 10      | .                  | .      | intergenic | -0.405 | 394753 rs7896 | 2 |
| ACT.AGT     | 11 | 61317930 | 61317948 | 6.33333 | .                  | .      | intergenic | -0.045 | rs789375038   | 3 |
| AC.GT       | 11 | 61478654 | 61478669 | 8       | .                  | .      | intergenic | -0.013 | 269140 rs7935 | 3 |
| AAC.GTT     | 11 | 61863097 | 61863111 | 5       | .                  | .      | intergenic | -0.001 | rs793124347   | 2 |
| AC.GT       | 11 | 62040996 | 62041008 | 6.5     | .                  | .      | intergenic | -0.119 | .             | 4 |
| ATCAT.ATGAT | 11 | 62057913 | 62057933 | 3.5     | .                  | .      | intergenic | 0.202  | rs786219681   | 2 |
| AAT.ATT     | 11 | 62379063 | 62379078 | 5.33333 | .                  | .      | intergenic | 0.14   | 325893 rs7926 | 2 |
| AC.GT       | 11 | 62407235 | 62407256 | 11      | .                  | .      | intergenic | .      | rs791102912   | 2 |
| AAAT.ATTT   | 11 | 62413126 | 62413143 | 4.5     | .                  | .      | intergenic | .      | .             | 2 |
| AT.AT       | 11 | 62511453 | 62511470 | 9       | .                  | .      | intergenic | -0.064 | 313196 rs7896 | 3 |
| AT.AT       | 11 | 62624152 | 62624161 | 5       | .                  | .      | intergenic | -0.014 | .             | 2 |
| AG.CT       | 11 | 62732136 | 62732150 | 7.5     | .                  | .      | intergenic | 0.004  | .             | 4 |
| AAAC.GTTT   | 11 | 62931150 | 62931164 | 3.75    | .                  | .      | intergenic | .      | .             | 2 |
| AT.AT       | 11 | 63053264 | 63053273 | 5       | .                  | .      | intergenic | .      | .             | 3 |
| AAAC.GTTT   | 11 | 63397968 | 63397990 | 5.75    | .                  | .      | intergenic | -0.167 | rs793389302   | 2 |
| AC.GT       | 11 | 63491168 | 63491190 | 11.5    | .                  | .      | intergenic | -0.124 | 324493 rs7913 | 3 |
| AAAC.GTTT   | 11 | 63983089 | 63983111 | 5.75    | .                  | .      | intergenic | .      | rs788934121   | 2 |
| AAAAC.GTTTT | 11 | 63994264 | 63994287 | 4.8     | .                  | .      | intergenic | .      | 325198 rs7916 | 2 |
| AAAC.GTTT   | 11 | 64362345 | 64362379 | 8.75    | .                  | .      | intergenic | -0.227 | rs709452796   | 2 |
| AG.CT       | 11 | 64478616 | 64478638 | 11.5    | .                  | .      | intergenic | 0.262  | rs704841174   | 5 |
| AAAC.GTTT   | 11 | 64711838 | 64711853 | 4       | .                  | .      | intergenic | -0.169 | 303776 rs7875 | 2 |
| AAAAG.CTTTT | 11 | 64713743 | 64713761 | 3.8     | .                  | .      | intergenic | -0.206 | 742676 rs7866 | 2 |
| AG.CT       | 11 | 64726172 | 64726182 | 5.5     | .                  | .      | intergenic | .      | rs786941530   | 2 |
| AAAT.ATTT   | 11 | 64864352 | 64864373 | 5.5     | .                  | .      | intergenic | -0.277 | 332501 rs7930 | 2 |
| AAT.ATT     | 11 | 64878754 | 64878773 | 6.66667 | .                  | .      | intergenic | 0.06   | .             | 2 |
| AAAT.ATTT   | 11 | 65196714 | 65196744 | 7.75    | .                  | .      | intergenic | .      | .             | 2 |
| AG.CT       | 11 | 65203040 | 65203057 | 9       | .                  | .      | intergenic | 1.02   | rs788201781   | 2 |
| AGAT.ATCT   | 11 | 65233463 | 65233479 | 4.25    | .                  | .      | intergenic | 0.052  | rs791444215   | 2 |
| AAAAG.CTTTT | 11 | 65238356 | 65238374 | 3.8     | .                  | .      | intergenic | 0.101  | 385114 rs7926 | 2 |
| AAAAT.ATTTT | 11 | 65486311 | 65486331 | 4.2     | .                  | .      | intergenic | 0.138  | 312239 rs7932 | 2 |
| AC.GT       | 11 | 65519291 | 65519306 | 8       | .                  | .      | intergenic | 0.124  | rs791642038   | 2 |
| AAC.GTT     | 11 | 65558343 | 65558360 | 6       | .                  | .      | intergenic | .      | 113773 rs7929 | 2 |
| AT.AT       | 11 | 65787088 | 65787097 | 5       | .                  | .      | intergenic | .      | rs790976266   | 2 |
| AAAT.ATTT   | 11 | 66022913 | 66022928 | 4       | .                  | .      | intergenic | .      | rs787815930   | 2 |
| AAAT.ATTT   | 11 | 66129072 | 66129098 | 6.75    | .                  | .      | intergenic | -0.273 | 351977 rs7881 | 2 |
| AT.AT       | 11 | 66362320 | 66362330 | 5.5     | .                  | .      | intergenic | 0.256  | rs786529796   | 2 |
| AG.CT       | 11 | 66401370 | 66401382 | 6.5     | .                  | .      | intergenic | 0.086  | .             | 2 |
| AAC.GTT     | 11 | 66511995 | 66512007 | 4.33333 | .                  | .      | intergenic | -0.039 | rs793801072   | 3 |
| AAAC.GTTT   | 11 | 66575337 | 66575361 | 6.25    | .                  | .      | intergenic | 0.186  | rs793716412   | 2 |
| AT.AT       | 11 | 66632955 | 66632972 | 9       | .                  | .      | intergenic | -0.028 | rs791316118   | 3 |
| AC.GT       | 11 | 66784757 | 66784778 | 11      | .                  | .      | intergenic | 0.22   | .             | 2 |
| AGG.CCT     | 11 | 67193534 | 67193552 | 6.33333 | .                  | .      | intergenic | .      | .             | 2 |
| AC.GT       | 11 | 67488093 | 67488103 | 5.5     | .                  | .      | intergenic | -0.176 | 397547 rs7882 | 2 |
| AAAT.ATTT   | 11 | 67678307 | 67678321 | 3.75    | .                  | .      | intergenic | -0.152 | .             | 3 |
| AC.GT       | 11 | 67749266 | 67749278 | 6.5     | .                  | .      | intergenic | .      | .             | 2 |
| AAAC.GTTT   | 11 | 67851292 | 67851318 | 6.75    | .                  | .      | intergenic | -0.429 | rs791567489   | 2 |
| AAAAG.CTTTT | 11 | 67868619 | 67868637 | 3.16667 | .                  | .      | intergenic | -0.345 | .             | 2 |
| AC.GT       | 11 | 67892707 | 67892727 | 10.5    | .                  | .      | intergenic | .      | rs789948154   | 2 |
| AG.CT       | 11 | 67973037 | 67973048 | 6       | .                  | .      | intergenic | 0.012  | rs786492754   | 2 |
| AC.GT       | 11 | 67977820 | 67977848 | 14.5    | .                  | .      | intergenic | .      | .             | 2 |
| AATG.CATT   | 11 | 68355150 | 68355168 | 4.75    | .                  | .      | intergenic | -0.202 | 111436 rs7867 | 2 |
| AG.CT       | 11 | 68472410 | 68472424 | 7.5     | .                  | .      | intergenic | 0.278  | 394360 rs7884 | 2 |
| AT.AT       | 11 | 68582233 | 68582245 | 6.5     | .                  | .      | intergenic | -0.074 | .             | 3 |
| AAAAC.GTTTT | 11 | 68582815 | 68582837 | 4.6     | .                  | .      | intergenic | 0.186  | rs787296748   | 2 |
| AT.AT       | 11 | 68737766 | 68737776 | 5.5     | .                  | .      | intergenic | -0.008 | rs707645564   | 3 |
| AACAC.GTGTT | 11 | 68906543 | 68906571 | 5.8     | .                  | .      | intergenic | 0.448  | rs789001271   | 2 |
| AT.AT       | 11 | 68912984 | 68912994 | 5.5     | .                  | .      | intergenic | 0.126  | .             | 2 |
| AAAC.GTTT   | 11 | 69169147 | 69169160 | 3.5     | .                  | .      | intergenic | .      | rs786651440   | 2 |
| AAAC.GTTT   | 11 | 69434036 | 69434064 | 7.25    | .                  | .      | intergenic | 0.046  | rs790327218   | 2 |
| AG.CT       | 11 | 69477431 | 69477445 | 7.5     | .                  | .      | intergenic | 0.001  | 314870 rs7882 | 3 |
| AAAG.CTTT   | 11 | 69532691 | 69532707 | 4.25    | .                  | .      | intergenic | 0.281  | rs791247442   | 2 |
| AAAC.GTTT   | 11 | 69707678 | 69707701 | 6       | ENSSSCT00000010405 | DCT    | intron     | -0.255 | rs792256572   | 2 |
| AC.GT       | 11 | 69723506 | 69723516 | 5.5     | .                  | .      | intergenic | -0.002 | rs791912599   | 2 |
| AAAT.ATTT   | 11 | 69848910 | 69848936 | 6.75    | ENSSSCT00000010408 | GPR180 | intron     | 0.241  | rs787185847   | 3 |

|              |    |          |          |         |                    |        |            |        |                  |   |
|--------------|----|----------|----------|---------|--------------------|--------|------------|--------|------------------|---|
| AC.GT        | 11 | 69869604 | 69869616 | 6.5     | ENSSSCT00000010407 | TGDS   | intron     | -0.098 | rs792281924      | 2 |
| AG.CT        | 11 | 69941011 | 69941025 | 7.5     | .                  | .      | intergenic | 0.044  | 113412 rs7877    | 3 |
| AAAAT.ATTTT  | 11 | 70175986 | 70176005 | 4       | ENSSSCT00000032528 | .      | intron     | .      | rs789342337      | 2 |
| AAAAAG.CTTTT | 11 | 70314269 | 70314289 | 3.5     | .                  | .      | intergenic | 0.016  | .                | 2 |
| AG.CT        | 11 | 70521523 | 70521534 | 6       | .                  | .      | intergenic | .      | rs791325381      | 2 |
| AAAC.GTTT    | 11 | 70529195 | 70529217 | 5.75    | .                  | .      | intergenic | .      | rs751623 rs7881  | 2 |
| AT.AT        | 11 | 70541994 | 70542005 | 6       | .                  | .      | intergenic | .      | rs71644 rs7892   | 2 |
| AAC.GTT      | 11 | 71917759 | 71917780 | 7.33333 | .                  | .      | intergenic | 0.045  | rs769937 rs7881  | 2 |
| AC.GT        | 11 | 72017533 | 72017543 | 5.5     | ENSSSCT00000010418 | DZIP1  | intron     | -0.144 | rs788837795      | 2 |
| AAAAT.ATTTT  | 11 | 72139752 | 72139778 | 5.4     | ENSSSCT00000026790 | DNAJC3 | intron     | .      | rs787696529      | 3 |
| AC.GT        | 11 | 72314489 | 72314500 | 6       | ENSSSCT00000010419 | .      | intron     | -0.111 | .                | 2 |
| AAC.GTT      | 11 | 72320921 | 72320935 | 5       | ENSSSCT00000010419 | .      | intron     | 0.187  | rs786503617      | 2 |
| AAAC.GTTT    | 11 | 72322321 | 72322344 | 6       | ENSSSCT00000010419 | .      | intron     | 0.275  | rs761972 rs7927  | 2 |
| AG.CT        | 11 | 72768891 | 72768902 | 6       | .                  | .      | intergenic | 0.478  | rs786439971      | 2 |
| AAAT.ATTT    | 11 | 72774616 | 72774635 | 5       | .                  | .      | intergenic | -0.14  | .                | 2 |
| AAT.ATT      | 11 | 72814559 | 72814572 | 4.66667 | .                  | .      | intergenic | 0.352  | .                | 3 |
| AAT.ATT      | 11 | 72905260 | 72905271 | 4       | .                  | .      | intergenic | 0.323  | .                | 2 |
| AAC.GTT      | 11 | 72989873 | 72989893 | 7       | .                  | .      | intergenic | -0.123 | rs7526151 rs7883 | 2 |
| AT.AT        | 11 | 72994098 | 72994113 | 8       | .                  | .      | intergenic | 0.007  | .                | 2 |
| AGC.GCT      | 11 | 73193202 | 73193219 | 6       | .                  | .      | intergenic | 0.309  | rs792296959      | 2 |
| AAAC.GTTT    | 11 | 73527940 | 73527961 | 5.5     | ENSSSCT00000010422 | MBNL2  | intron     | 0.187  | rs7395830 rs7872 | 2 |
| AAAT.ATTT    | 11 | 73770058 | 73770075 | 4.5     | .                  | .      | intergenic | 0.301  | rs791595196      | 2 |
| AC.GT        | 11 | 73933915 | 73933927 | 6.5     | .                  | .      | intergenic | 0.224  | rs739533 rs7931  | 3 |
| AAACC.GGTTT  | 11 | 73989425 | 73989448 | 4.8     | .                  | .      | intergenic | 0.188  | .                | 2 |
| AC.GT        | 11 | 74021094 | 74021103 | 5       | .                  | .      | intergenic | 0.246  | .                | 3 |
| AG.CT        | 11 | 74212264 | 74212284 | 10.5    | .                  | .      | intergenic | .      | .                | 2 |
| AAAT.ATTT    | 11 | 74221469 | 74221486 | 4.5     | .                  | .      | intergenic | -0.107 | rs791219053      | 2 |
| AAAC.GTTT    | 11 | 74230730 | 74230743 | 3.5     | .                  | .      | intergenic | 0.172  | rs731748 rs7890  | 2 |
| AC.GT        | 11 | 75208489 | 75208505 | 8.5     | .                  | .      | intergenic | 0.109  | rs77462 rs7874   | 2 |
| AAC.GTT      | 11 | 75314389 | 75314401 | 4.33333 | .                  | .      | intergenic | 0.074  | rs793870879      | 2 |
| AAT.ATT      | 11 | 75377074 | 75377086 | 4.33333 | .                  | .      | intergenic | 0.092  | rs710583847      | 2 |
| AC.GT        | 11 | 75390494 | 75390505 | 6       | ENSSSCT00000010434 | UBAC2  | intron     | -0.037 | rs786385243      | 2 |
| AAAG.CTTT    | 11 | 75895940 | 75895961 | 5.5     | .                  | .      | intergenic | 0.051  | rs751452 rs7928  | 2 |
| AC.GT        | 11 | 75953709 | 75953720 | 6       | .                  | .      | intergenic | 0.062  | rs7398311 rs7913 | 2 |
| AAAT.ATTT    | 11 | 76143429 | 76143448 | 5       | .                  | .      | intergenic | .      | rs791827958      | 2 |
| AC.GT        | 11 | 76231063 | 76231072 | 5       | .                  | .      | intergenic | .      | .                | 4 |
| AC.GT        | 11 | 76308780 | 76308794 | 7.5     | .                  | .      | intergenic | -0.094 | .                | 2 |
| AC.GT        | 11 | 76381404 | 76381414 | 5.5     | ENSSSCT00000010440 | .      | intron     | 0.056  | rs729591 rs7899  | 3 |
| AAAAAT.ATTTT | 11 | 76816230 | 76816248 | 3.16667 | .                  | .      | intergenic | 0.233  | .                | 2 |
| AAAC.GTTT    | 11 | 76919733 | 76919751 | 4.75    | .                  | .      | intergenic | -0.17  | rs769905 rs7877  | 2 |
| AG.CT        | 11 | 77175607 | 77175616 | 5       | ENSSSCT00000024376 | .      | intron     | .      | rs792511496      | 2 |
| AC.GT        | 11 | 77242977 | 77242987 | 5.5     | .                  | .      | intergenic | 0.056  | .                | 4 |
| AAAC.GTTT    | 11 | 77251967 | 77251981 | 3.75    | .                  | .      | intergenic | 0.033  | rs793818437      | 2 |
| AATG.CATT    | 11 | 77445298 | 77445313 | 4       | ENSSSCT00000010444 | ITGBL1 | intron     | 0.105  | rs786896676      | 2 |
| AC.GT        | 11 | 77625537 | 77625547 | 5.5     | ENSSSCT00000010445 | FGF14  | intron     | 0.027  | .                | 2 |
| AC.GT        | 11 | 77632003 | 77632012 | 5       | ENSSSCT00000010445 | FGF14  | intron     | -0.006 | .                | 2 |
| AC.GT        | 11 | 77724250 | 77724261 | 6       | ENSSSCT00000010445 | FGF14  | intron     | 0.005  | .                | 3 |
| AAC.GTT      | 11 | 77758256 | 77758269 | 4.66667 | ENSSSCT00000010445 | FGF14  | intron     | .      | rs7327079 rs7926 | 2 |
| AATG.CATT    | 11 | 77761670 | 77761695 | 6.5     | ENSSSCT00000010445 | FGF14  | intron     | -0.128 | rs736497 rs7897  | 2 |
| AAAAC.GTTTT  | 11 | 77901503 | 77901519 | 3.4     | .                  | .      | intergenic | 0.069  | rs790677206      | 2 |
| AG.CT        | 11 | 78231661 | 78231671 | 5.5     | .                  | .      | intergenic | -0.07  | .                | 2 |
| AAG.CTT      | 11 | 78299348 | 78299362 | 5       | ENSSSCT00000010446 | .      | intron     | 0.021  | rs790753732      | 2 |
| AAAAAC.GTTTT | 11 | 78313038 | 78313059 | 3.66667 | ENSSSCT00000010446 | .      | intron     | -0.265 | rs793834621      | 2 |
| AAAAC.GTTTT  | 11 | 78331377 | 78331394 | 3.6     | ENSSSCT00000010447 | .      | intron     | -0.025 | rs788387988      | 2 |
| AAAC.GTTT    | 11 | 78420040 | 78420067 | 7       | ENSSSCT00000026999 | .      | intron     | 0.061  | rs786275002      | 2 |
| AAAC.GTTT    | 11 | 78420040 | 78420067 | 7       | ENSSSCT00000010450 | .      | intron     | 0.061  | rs786275002      | 2 |
| AT.AT        | 11 | 78484023 | 78484032 | 5       | ENSSSCT00000026999 | .      | intron     | .      | rs789775285      | 2 |
| AT.AT        | 11 | 78484023 | 78484032 | 5       | ENSSSCT00000010450 | .      | intron     | .      | rs789775285      | 2 |
| AAAAC.GTTTT  | 11 | 78519624 | 78519648 | 5       | .                  | .      | intergenic | -0.099 | rs788555922      | 2 |
| AAAC.CTTT    | 11 | 78524238 | 78524252 | 3.75    | .                  | .      | intergenic | -0.318 | rs7394180 rs7894 | 2 |
| ACAT.ATGT    | 11 | 78674647 | 78674661 | 3.75    | .                  | .      | intergenic | .      | rs790923508      | 2 |
| AAAG.CTTT    | 11 | 78689232 | 78689255 | 6       | .                  | .      | intergenic | .      | .                | 2 |
| ATC.GAT      | 11 | 79181897 | 79181910 | 4.66667 | .                  | .      | intergenic | -0.025 | rs7301607 rs7889 | 2 |
| AAAT.ATTT    | 11 | 79206302 | 79206318 | 4.25    | .                  | .      | intergenic | 0.056  | rs790383575      | 2 |
| AAAG.CTTT    | 11 | 79218586 | 79218598 | 3.25    | .                  | .      | intergenic | 0.055  | rs7305972 rs7889 | 3 |
| AAG.CTT      | 11 | 79701328 | 79701340 | 4.33333 | .                  | .      | intergenic | -0.183 | rs792633361      | 2 |
| AAAC.GTTT    | 11 | 79706393 | 79706430 | 9.5     | .                  | .      | intergenic | 0.151  | rs752879 rs7901  | 2 |
| AAT.ATT      | 11 | 79790607 | 79790622 | 5.33333 | .                  | .      | intergenic | .      | .                | 2 |
| AAAAAC.GTTTT | 11 | 79812053 | 79812072 | 3.33333 | .                  | .      | intergenic | .      | rs792631240      | 2 |
| AG.CT        | 11 | 79813009 | 79813018 | 5       | .                  | .      | intergenic | -0.098 | rs789993801      | 2 |
| AC.GT        | 11 | 79851296 | 79851322 | 13.5    | .                  | .      | intergenic | .      | rs788489213      | 4 |
| AAAC.GTTT    | 11 | 79916107 | 79916127 | 5.25    | .                  | .      | intergenic | -0.369 | rs787942919      | 2 |
| AAAG.CTTT    | 11 | 79938641 | 79938664 | 6       | .                  | .      | intergenic | -0.619 | rs786544994      | 2 |
| AAC.GTT      | 11 | 79952384 | 79952405 | 7.33333 | .                  | .      | intergenic | 0.275  | rs7389220 rs7873 | 3 |
| AG.CT        | 11 | 80232406 | 80232423 | 9       | .                  | .      | intergenic | -0.21  | rs791976986      | 4 |
| AAAC.GTTT    | 11 | 80542937 | 80542959 | 5.75    | .                  | .      | intergenic | -0.199 | rs792340603      | 2 |
| AAAG.CTTT    | 11 | 80605644 | 80605668 | 6.25    | .                  | .      | intergenic | 0.082  | rs734138 rs7917  | 2 |
| AT.AT        | 11 | 80620465 | 80620476 | 6       | .                  | .      | intergenic | 0.8    | rs786793877      | 4 |
| AT.AT        | 11 | 81012620 | 81012631 | 6       | .                  | .      | intergenic | .      | rs789475347      | 4 |
| AAC.GTT      | 11 | 81237191 | 81237206 | 5.33333 | .                  | .      | intergenic | 0.615  | .                | 2 |
| AT.AT        | 11 | 81333534 | 81333558 | 12.5    | .                  | .      | intergenic | -0.136 | rs7696997454     | 2 |
| AC.GT        | 11 | 81361726 | 81361737 | 6       | .                  | .      | intergenic | -0.01  | rs787971803      | 2 |
| AG.CT        | 11 | 81380623 | 81380637 | 7.5     | .                  | .      | intergenic | -0.035 | rs793520924      | 2 |
| AAC.GTT      | 11 | 81498183 | 81498195 | 4.33333 | .                  | .      | intergenic | -0.189 | .                | 2 |



|              |    |          |          |         |                    |          |            |        |               |   |
|--------------|----|----------|----------|---------|--------------------|----------|------------|--------|---------------|---|
| AAC.GTT      | 11 | 81554787 | 81554800 | 4.66667 | .                  | .        | intergenic | -0.404 | rs790140784   | 2 |
| AG.CT        | 11 | 81725018 | 81725030 | 6.5     | .                  | .        | intergenic | .      | rs792236205   | 2 |
| AC.GT        | 11 | 81977432 | 81977441 | 5       | .                  | .        | intergenic | -0.452 | rs789656395   | 2 |
| AAAC.GTTT    | 11 | 82306410 | 82306430 | 5.25    | .                  | .        | intergenic | -0.068 | rs789788399   | 4 |
| AAAT.ATTT    | 11 | 82429193 | 82429213 | 5.25    | .                  | .        | intergenic | .      | 100140 rs7873 | 2 |
| AC.GT        | 11 | 82879037 | 82879047 | 5.5     | .                  | .        | intergenic | -0.236 | rs792923445   | 2 |
| AT.AT        | 11 | 82998551 | 82998561 | 5.5     | .                  | .        | intergenic | .      | rs790896202   | 3 |
| AC.GT        | 11 | 83238529 | 83238551 | 11.5    | .                  | .        | intergenic | 0.119  | 315591 rs7880 | 2 |
| AG.CT        | 11 | 83478416 | 83478436 | 10.5    | ENSSSCT00000010461 | MYO16    | intron     | 0.405  | 383154 rs7877 | 2 |
| AC.GT        | 11 | 83536413 | 83536427 | 7.5     | ENSSSCT00000010461 | MYO16    | intron     | 0.093  | rs793463374   | 2 |
| AC.GT        | 11 | 84377604 | 84377614 | 5.5     | ENSSSCT00000010462 | COL4A1   | intron     | -0.273 | .             | 3 |
| AC.GT        | 11 | 84508348 | 84508359 | 6       | .                  | .        | intergenic | -0.161 | 286132 rs7879 | 2 |
| AAAT.ATTT    | 11 | 84714694 | 84714706 | 3.25    | .                  | .        | intergenic | .      | .             | 2 |
| AC.GT        | 11 | 84757422 | 84757432 | 5.5     | ENSSSCT00000029690 | .        | intron     | .      | rs791770753   | 3 |
| AGGC.GCCT    | 11 | 86485271 | 86485289 | 4.75    | .                  | .        | intergenic | -0.053 | rs788141475   | 2 |
| ACCCT.AGGGT  | 11 | 86616589 | 86616607 | 3.16667 | ENSSSCT00000010486 | GAS6     | promoter   | -0.024 | 128578 rs7913 | 2 |
| AC.GT        | 11 | 86734704 | 86734719 | 8       | ENSSSCT00000010488 | RASA3    | intron     | -0.351 | .             | 2 |
| AAAC.GTTT    | 11 | 87143341 | 87143355 | 3.75    | .                  | .        | intergenic | .      | 362958 rs7915 | 3 |
| AAAC.GTTT    | 12 | 379850   | 379866   | 4.25    | ENSSSCT00000018654 | TBCD     | intron     | .      | rs787646222   | 2 |
| AC.GT        | 12 | 777100   | 777111   | 6       | .                  | .        | intergenic | .      | .             | 2 |
| AC.GT        | 12 | 1234609  | 1234636  | 14      | ENSSSCT00000027597 | .        | intron     | -0.446 | 758095 rs7885 | 2 |
| AC.GT        | 12 | 1234609  | 1234636  | 14      | ENSSSCT00000023942 | .        | intron     | -0.446 | 758095 rs7885 | 2 |
| AAAT.ATTT    | 12 | 1490750  | 1490764  | 3.75    | ENSSSCT00000023391 | AATK     | intron     | -0.084 | 210732 rs7882 | 2 |
| AAAT.ATTT    | 12 | 1490750  | 1490764  | 3.75    | ENSSSCT00000018660 | AATK     | intron     | -0.084 | 210732 rs7882 | 2 |
| AT.AT        | 12 | 2494898  | 2494913  | 8       | ENSSSCT00000018683 | TBC1D16  | intron     | -0.026 | .             | 4 |
| AG.CT        | 12 | 2606583  | 2606592  | 5       | .                  | .        | intergenic | -0.073 | rs789782727   | 2 |
| AC.GT        | 12 | 3694988  | 3694999  | 6       | .                  | .        | intergenic | 0.088  | .             | 4 |
| AG.CT        | 12 | 3770214  | 3770224  | 5.5     | .                  | .        | intergenic | -0.252 | .             | 2 |
| AAAG.CTTT    | 12 | 4614506  | 4614525  | 5       | .                  | .        | intergenic | .      | rs788589848   | 2 |
| AC.GT        | 12 | 4627442  | 4627453  | 6       | ENSSSCT00000022358 | MFS11    | 3'utr      | 0.046  | .             | 3 |
| AAAAC.GTTTT  | 12 | 4768423  | 4768444  | 4.4     | .                  | .        | intergenic | .      | rs791456632   | 2 |
| AC.GT        | 12 | 4770636  | 4770645  | 5       | .                  | .        | intergenic | .      | rs791608894   | 2 |
| AAAG.CTTT    | 12 | 5070979  | 5070992  | 3.5     | ENSSSCT00000018709 | PRPSAP1  | intron     | .      | rs788340760   | 2 |
| AG.CT        | 12 | 5134357  | 5134367  | 5.5     | ENSSSCT00000018711 | RNF157   | intron     | -0.123 | .             | 4 |
| AAAT.ATTT    | 12 | 5409776  | 5409798  | 5.75    | .                  | .        | intergenic | .      | rs790076277   | 2 |
| AC.GT        | 12 | 5501731  | 5501745  | 7.5     | .                  | .        | intergenic | .      | 397295 rs7927 | 2 |
| AAAG.CTTT    | 12 | 5552484  | 5552506  | 5.75    | ENSSSCT00000018726 | UNK      | intron     | -0.09  | rs791163156   | 2 |
| AAAC.GTTT    | 12 | 5676979  | 5676994  | 4       | ENSSSCT00000018730 | SAP30BP  | intron     | 0.625  | rs790962948   | 2 |
| AAAC.GTTT    | 12 | 5676979  | 5676994  | 4       | ENSSSCT00000023832 | SAP30BP  | intron     | 0.625  | rs790962948   | 2 |
| AAAC.GTTT    | 12 | 5676979  | 5676994  | 4       | ENSSSCT00000025315 | RECQL5   | promoter   | 0.625  | rs790962948   | 2 |
| AC.GT        | 12 | 6241924  | 6241936  | 6.5     | ENSSSCT00000018742 | KCTD2    | intron     | -0.235 | rs788603062   | 2 |
| AAC.GTT      | 12 | 7032192  | 7032206  | 5       | .                  | .        | intergenic | .      | 163279 rs7899 | 2 |
| AG.CT        | 12 | 7787417  | 7787437  | 10.5    | ENSSSCT00000018773 | SDK2     | intron     | -0.265 | 341615 rs7903 | 2 |
| AAAT.ATTT    | 12 | 7984803  | 7984821  | 4.75    | .                  | .        | intergenic | .      | 330541 rs7921 | 2 |
| AAC.GTT      | 12 | 8385690  | 8385712  | 7.66667 | ENSSSCT00000018779 | SLC39A11 | intron     | .      | 722006 rs7938 | 2 |
| ACAG.CTGT    | 12 | 8393053  | 8393071  | 4.75    | ENSSSCT00000018779 | SLC39A11 | intron     | -0.224 | 245741 rs7887 | 2 |
| AATG.CATT    | 12 | 8393725  | 8393740  | 4       | ENSSSCT00000018779 | SLC39A11 | intron     | 0.196  | .             | 2 |
| AAAC.GTTT    | 12 | 8482615  | 8482634  | 5       | .                  | .        | intergenic | .      | 763786 rs7864 | 2 |
| AG.CT        | 12 | 8814490  | 8814516  | 13.5    | .                  | .        | intergenic | -0.092 | rs788320892   | 2 |
| AAG.CTT      | 12 | 8977494  | 8977513  | 6.66667 | .                  | .        | intergenic | -0.075 | rs786527230   | 2 |
| AAAAG.CTTTT  | 12 | 9087997  | 9088035  | 7.8     | .                  | .        | intergenic | -0.05  | 392071 rs7903 | 2 |
| AAAC.GTT     | 12 | 9229715  | 9229729  | 7.5     | .                  | .        | intergenic | 0.519  | rs789675738   | 4 |
| AAAAC.GTTTT  | 12 | 9436628  | 9436645  | 3.6     | .                  | .        | intergenic | -0.181 | 185345 rs7902 | 2 |
| AG.CT        | 12 | 9542873  | 9542882  | 5       | .                  | .        | intergenic | -0.143 | .             | 3 |
| AAAC.GTTT    | 12 | 9774590  | 9774605  | 4       | .                  | .        | intergenic | 0.11   | 215024 rs7922 | 2 |
| AAAAAC.GTTTT | 12 | 9827241  | 9827260  | 3.33333 | .                  | .        | intergenic | -0.022 | 700848 rs7928 | 2 |
| AC.GT        | 12 | 10204451 | 10204462 | 6       | .                  | .        | intergenic | -0.167 | rs791002237   | 2 |
| AC.GT        | 12 | 10244368 | 10244386 | 9.5     | .                  | .        | intergenic | 0.073  | .             | 2 |
| AGG.CCT      | 12 | 10369330 | 10369359 | 10      | .                  | .        | intergenic | -0.325 | .             | 2 |
| AC.GT        | 12 | 10391354 | 10391364 | 5.5     | .                  | .        | intergenic | -0.206 | .             | 3 |
| AAAT.ATTT    | 12 | 10443746 | 10443764 | 4.75    | .                  | .        | intergenic | 0.416  | 738438 rs7906 | 2 |
| AAAC.GTTT    | 12 | 10482611 | 10482638 | 7       | .                  | .        | intergenic | -0.08  | rs786331727   | 2 |
| AC.GT        | 12 | 10730599 | 10730609 | 5.5     | .                  | .        | intergenic | -0.106 | .             | 3 |
| AAC.GTT      | 12 | 10754794 | 10754817 | 8       | .                  | .        | intergenic | -0.067 | rs792444481   | 2 |
| AG.CT        | 12 | 10816149 | 10816161 | 6.5     | .                  | .        | intergenic | 0.055  | .             | 2 |
| AG.CT        | 12 | 10910990 | 10911004 | 7.5     | .                  | .        | intergenic | 0.208  | .             | 4 |
| AAAC.GTTT    | 12 | 10936176 | 10936194 | 4.75    | .                  | .        | intergenic | 0.304  | rs787097161   | 2 |
| AAAG.CTTT    | 12 | 10957759 | 10957771 | 3.25    | .                  | .        | intergenic | -0.146 | 377431 rs7895 | 2 |
| AG.CT        | 12 | 10969663 | 10969674 | 6       | .                  | .        | intergenic | 0.05   | .             | 3 |
| AAAT.ATTT    | 12 | 11116567 | 11116584 | 4.5     | .                  | .        | intergenic | -0.136 | rs789572496   | 2 |
| AC.GT        | 12 | 11149616 | 11149632 | 8.5     | ENSSSCT00000035633 | MKK6     | intron     | 0.242  | rs787496064   | 2 |
| AC.GT        | 12 | 11193889 | 11193901 | 6.5     | ENSSSCT00000034463 | MKK6     | intron     | .      | rs789825134   | 2 |
| AC.GT        | 12 | 11193889 | 11193901 | 6.5     | ENSSSCT00000018783 | MKK6     | intron     | .      | rs789825134   | 2 |
| AAAT.ATTT    | 12 | 11204602 | 11204617 | 4       | ENSSSCT00000034463 | MKK6     | intron     | 0.206  | rs791367607   | 2 |
| AAAT.ATTT    | 12 | 11204602 | 11204617 | 4       | ENSSSCT00000018783 | MKK6     | intron     | 0.206  | rs791367607   | 2 |
| AC.GT        | 12 | 11246306 | 11246320 | 7.5     | ENSSSCT00000018783 | MKK6     | intron     | 0.233  | 383186 rs7893 | 2 |
| AAC.GTT      | 12 | 11268388 | 11268405 | 6       | .                  | .        | intergenic | 0.141  | 365557 rs7925 | 2 |
| AAGG.CCTT    | 12 | 11372101 | 11372122 | 5.5     | .                  | .        | intergenic | 0.1    | 321510 rs7865 | 2 |
| AAAC.GTTT    | 12 | 11654947 | 11654963 | 4.25    | .                  | .        | intergenic | 0.099  | rs792430399   | 2 |
| AG.CT        | 12 | 11904317 | 11904333 | 8.5     | .                  | .        | intergenic | -0.156 | 129982 rs7917 | 2 |
| AAAAC.GTTTT  | 12 | 11935854 | 11935868 | 3       | .                  | .        | intergenic | .      | rs792207455   | 2 |
| AT.AT        | 12 | 12019960 | 12019969 | 5       | .                  | .        | intergenic | .      | rs791888597   | 2 |
| AAAC.GTTT    | 12 | 12109421 | 12109439 | 4.75    | ENSSSCT00000018787 | FAM20A   | promoter   | -0.046 | rs788746754   | 2 |
| AAAC.GTTT    | 12 | 12187916 | 12187932 | 4.25    | ENSSSCT00000018789 | WIPI1    | intron     | 0.125  | rs792690484   | 2 |



|             |    |          |          |         |                    |          |            |        |               |   |
|-------------|----|----------|----------|---------|--------------------|----------|------------|--------|---------------|---|
| AAAC.GTTT   | 12 | 12415914 | 12415928 | 3.75    | ENSSSCT00000018792 | GNA13    | intron     | .      | .             | 2 |
| AAAT.ATTT   | 12 | 12838802 | 12838834 | 8.25    | ENSSSCT00000018795 | .        | intron     | 0.2    | .             | 2 |
| AT.AT       | 12 | 12873323 | 12873334 | 6       | ENSSSCT00000018795 | .        | intron     | .      | 306061 rs7879 | 4 |
| AT.AT       | 12 | 12989539 | 12989548 | 5       | .                  | .        | intergenic | .      | rs787370227   | 2 |
| AAAC.GTTT   | 12 | 12990761 | 12990787 | 6.75    | .                  | .        | intergenic | .      | 322623 rs7938 | 2 |
| AC.GT       | 12 | 13042016 | 13042045 | 15      | ENSSSCT00000027357 | .        | intron     | 0.344  | .             | 2 |
| AT.AT       | 12 | 13048999 | 13049009 | 5.5     | ENSSSCT00000027357 | .        | intron     | -0.513 | 346841 rs7863 | 2 |
| AC.GT       | 12 | 13137379 | 13137391 | 6.5     | .                  | .        | intergenic | .      | .             | 2 |
| AC.GT       | 12 | 13437776 | 13437787 | 6       | .                  | .        | intergenic | -0.02  | rs789466189   | 2 |
| AAC.GTT     | 12 | 13526697 | 13526737 | 13.6667 | ENSSSCT00000018798 | PRKCA    | intron     | -0.089 | rs792679305   | 2 |
| AT.AT       | 12 | 13896725 | 13896736 | 6       | ENSSSCT00000018802 | HELZ     | intron     | .      | 358151 rs7904 | 2 |
| AAATG.CATTT | 12 | 14012826 | 14012844 | 3.8     | ENSSSCT00000018802 | HELZ     | intron     | .      | rs786988064   | 2 |
| AAAAC.GTTTT | 12 | 14112774 | 14112795 | 3.66667 | ENSSSCT00000018804 | PITPNC1  | intron     | 0.071  | .             | 2 |
| AT.AT       | 12 | 14165378 | 14165387 | 5       | ENSSSCT00000018804 | PITPNC1  | intron     | 0.276  | .             | 4 |
| AAAT.ATTT   | 12 | 14184560 | 14184578 | 4.75    | ENSSSCT00000018804 | PITPNC1  | intron     | 0.036  | rs789941461   | 2 |
| AAAG.CTTT   | 12 | 14228023 | 14228046 | 6       | ENSSSCT00000018804 | PITPNC1  | intron     | .      | 795966 rs7896 | 3 |
| AAAC.GTTT   | 12 | 14262647 | 14262671 | 6.25    | ENSSSCT00000018804 | PITPNC1  | intron     | -0.113 | rs786336558   | 2 |
| AAAC.GTTT   | 12 | 14356137 | 14356153 | 4.25    | ENSSSCT00000018804 | PITPNC1  | intron     | .      | rs790438582   | 3 |
| AAAC.GTTT   | 12 | 14464199 | 14464211 | 3.25    | .                  | .        | intergenic | .      | 352708 rs7896 | 2 |
| AAAAC.GTTTT | 12 | 14511937 | 14511961 | 5       | .                  | .        | intergenic | 0.16   | 325604 rs7922 | 3 |
| AT.AT       | 12 | 14593979 | 14593992 | 7       | .                  | .        | intergenic | .      | rs793837668   | 2 |
| AC.GT       | 12 | 14837796 | 14837806 | 5.5     | ENSSSCT00000018810 | TEX2     | intron     | 0.039  | .             | 2 |
| AAAAC.GTTTT | 12 | 15353089 | 15353111 | 4.6     | ENSSSCT00000018827 | KCNH6    | intron     | -0.19  | rs793853612   | 2 |
| AAAAC.GTTTT | 12 | 15353089 | 15353111 | 4.6     | ENSSSCT00000029983 | KCNH6    | intron     | -0.19  | rs793853612   | 2 |
| AAAAC.GTTTT | 12 | 15467426 | 15467453 | 4.66667 | ENSSSCT00000018832 | TANC2    | intron     | 2.397  | rs790996112   | 2 |
| AGGAG.CTCCT | 12 | 15475025 | 15475045 | 3.5     | ENSSSCT00000018832 | TANC2    | intron     | .      | .             | 3 |
| AAAAG.CTTTT | 12 | 15492197 | 15492221 | 4.16667 | ENSSSCT00000018832 | TANC2    | intron     | 0.257  | 336077 rs7879 | 2 |
| AG.CT       | 12 | 15583684 | 15583698 | 7.5     | ENSSSCT00000018832 | TANC2    | intron     | 0.096  | .             | 2 |
| AAAG.CTTT   | 12 | 15714029 | 15714055 | 6.75    | .                  | .        | intergenic | .      | rs787008094   | 2 |
| AAAT.ATTT   | 12 | 15890017 | 15890045 | 7.25    | .                  | .        | intergenic | 0.066  | rs789286792   | 2 |
| AAAAC.GTTTT | 12 | 16066096 | 16066124 | 5.8     | ENSSSCT00000018837 | TLK2     | intron     | -0.464 | rs787564705   | 2 |
| AAAC.GTTT   | 12 | 16160606 | 16160621 | 4       | ENSSSCT00000018840 | EFCAB3   | intron     | 0.881  | rs786826650   | 2 |
| AC.GT       | 12 | 16221175 | 16221187 | 6.5     | .                  | .        | intergenic | .      | rs789299486   | 3 |
| AG.CT       | 12 | 16370338 | 16370348 | 5.5     | .                  | .        | intergenic | .      | rs787371421   | 2 |
| AC.GT       | 12 | 16435610 | 16435621 | 6       | .                  | .        | intergenic | .      | rs792081110   | 3 |
| AAAAC.GTTTT | 12 | 16472177 | 16472205 | 5.8     | .                  | .        | intergenic | .      | rs789052850   | 2 |
| AAAG.CTTT   | 12 | 16703915 | 16703938 | 6       | ENSSSCT00000027689 | EFCAB13  | promoter   | 0.528  | rs790237671   | 2 |
| AAAG.CTTT   | 12 | 16703915 | 16703938 | 6       | ENSSSCT00000018841 | EFCAB13  | promoter   | 0.528  | rs790237671   | 2 |
| AAC.GTT     | 12 | 16714611 | 16714631 | 7       | .                  | .        | intergenic | 0.049  | rs786740483   | 2 |
| AAAC.GTTT   | 12 | 16780068 | 16780086 | 4.75    | .                  | .        | intergenic | 0.154  | 785182 rs7892 | 2 |
| AAAG.CTTT   | 12 | 16791109 | 16791123 | 3.75    | .                  | .        | intergenic | 0.652  | rs791701690   | 2 |
| AAC.GTT     | 12 | 16852963 | 16852976 | 4.66667 | ENSSSCT00000018844 | CDC27    | intron     | 0.281  | rs789868521   | 2 |
| AAC.GTT     | 12 | 17098964 | 17098981 | 6       | ENSSSCT00000018846 | KANSL1   | intron     | 0.076  | rs792698204   | 2 |
| AC.GT       | 12 | 17275518 | 17275529 | 6       | .                  | .        | intergenic | .      | 345493 rs7862 | 2 |
| AT.AT       | 12 | 17487094 | 17487105 | 6       | .                  | .        | intergenic | .      | 766269 rs7937 | 2 |
| AAAAC.GTTTT | 12 | 17520958 | 17520980 | 4.6     | .                  | .        | intergenic | .      | .             | 2 |
| AAAC.GTTT   | 12 | 18182019 | 18182031 | 3.25    | ENSSSCT00000018861 | PLEKHM1  | intron     | 0.143  | rs788009974   | 2 |
| AC.GT       | 12 | 18477473 | 18477487 | 7.5     | .                  | .        | intergenic | 0.218  | rs791298802   | 2 |
| AG.CT       | 12 | 18735329 | 18735339 | 5.5     | ENSSSCT00000018882 | EFTUD2   | intron     | 1.442  | rs790573875   | 2 |
| AAC.GTT     | 12 | 18991927 | 18991949 | 7.66667 | .                  | .        | intergenic | .      | rs787891582   | 2 |
| AC.GT       | 12 | 19492272 | 19492284 | 6.5     | .                  | .        | intergenic | -0.11  | rs788628203   | 3 |
| AAAT.ATTT   | 12 | 19536391 | 19536407 | 4.25    | ENSSSCT00000018911 | MPP3     | intron     | -0.565 | rs793050085   | 2 |
| CACTC.AGATG | 12 | 19581046 | 19581066 | 3.5     | ENSSSCT00000024088 | DUSP3    | 3'utr      | 0.004  | rs792613631   | 2 |
| AAAC.GTTT   | 12 | 19995727 | 19995749 | 5.75    | .                  | .        | intergenic | .      | rs792697774   | 2 |
| AAAT.ATTT   | 12 | 20074109 | 20074126 | 4.5     | ENSSSCT00000025436 | PIGBRCA1 | intron     | 0.282  | rs788880834   | 2 |
| AAAG.CTTT   | 12 | 20163618 | 20163662 | 11.25   | .                  | .        | intergenic | .      | rs790885245   | 2 |
| AG.CT       | 12 | 20283177 | 20283186 | 5       | ENSSSCT00000018927 | WNK4     | intron     | 1.741  | .             | 2 |
| AG.CT       | 12 | 20516644 | 20516653 | 5       | ENSSSCT00000018941 | .        | intron     | -0.011 | rs787196663   | 2 |
| AC.GT       | 12 | 21303649 | 21303663 | 7.5     | .                  | .        | intergenic | -0.731 | .             | 2 |
| AAAC.GTTT   | 12 | 21721872 | 21721893 | 5.5     | .                  | .        | intergenic | .      | rs696776831   | 2 |
| AC.GT       | 12 | 21964569 | 21964579 | 5.5     | .                  | .        | intergenic | .      | rs788827895   | 2 |
| AG.CT       | 12 | 21977051 | 21977068 | 9       | .                  | .        | intergenic | 0.149  | rs786324393   | 2 |
| AAAT.ATTT   | 12 | 22041665 | 22041696 | 8       | .                  | .        | intergenic | -0.092 | rs791118502   | 2 |
| AC.GT       | 12 | 22137031 | 22137041 | 5.5     | .                  | .        | intergenic | 0.223  | rs786777208   | 2 |
| AC.GT       | 12 | 22231850 | 22231868 | 9.5     | .                  | .        | intergenic | 0      | rs791826496   | 4 |
| AT.AT       | 12 | 22305306 | 22305318 | 6.5     | .                  | .        | intergenic | -0.021 | rs788671773   | 2 |
| AC.GT       | 12 | 22402562 | 22402579 | 9       | .                  | .        | intergenic | 0.335  | 390455 rs7877 | 2 |
| AAAG.CTTT   | 12 | 22536644 | 22536676 | 8.25    | .                  | .        | intergenic | 0.114  | rs787144341   | 2 |
| AAAG.CTTT   | 12 | 22699744 | 22699763 | 5       | .                  | .        | intergenic | 0.084  | rs791737909   | 2 |
| AG.CT       | 12 | 22825786 | 22825798 | 6.5     | ENSSSCT00000019043 | .        | intron     | 0.809  | .             | 4 |
| AAAAT.ATTTT | 12 | 22828490 | 22828509 | 4       | ENSSSCT00000019043 | .        | intron     | 0.768  | rs788203953   | 2 |
| AC.GT       | 12 | 22865212 | 22865226 | 7.5     | .                  | .        | intergenic | 0.34   | rs788052736   | 4 |
| AAAT.ATTT   | 12 | 22914198 | 22914215 | 4.5     | ENSSSCT00000019046 | ZPBP2    | intron     | .      | .             | 2 |
| AAAT.ATTT   | 12 | 22914198 | 22914215 | 4.5     | ENSSSCT00000025164 | ZPBP2    | intron     | .      | .             | 2 |
| AT.AT       | 12 | 22950810 | 22950828 | 9.5     | ENSSSCT00000019047 | IKZF3    | intron     | .      | .             | 2 |
| AC.GT       | 12 | 23133618 | 23133637 | 10      | .                  | .        | intergenic | 0.175  | rs789224789   | 4 |
| AAC.GTT     | 12 | 23194643 | 23194658 | 5.33333 | .                  | .        | intergenic | 0.2    | rs790545834   | 2 |
| AAC.GTT     | 12 | 23258603 | 23258616 | 4.66667 | ENSSSCT00000019057 | CDK12    | intron     | 2.584  | rs790879186   | 2 |
| AAAT.ATTT   | 12 | 23385555 | 23385576 | 5.5     | ENSSSCT00000019059 | FBXL20   | intron     | 0.025  | rs791007275   | 2 |
| AC.GT       | 12 | 24267147 | 24267170 | 12      | .                  | .        | intergenic | 0.151  | 254262 rs7889 | 2 |
| AC.GT       | 12 | 24640470 | 24640486 | 8.5     | .                  | .        | intergenic | 0.198  | rs790325760   | 2 |
| AAAT.ATTT   | 12 | 24656615 | 24656637 | 5.75    | .                  | .        | intergenic | 0.386  | rs793742545   | 2 |
| AG.CT       | 12 | 24709947 | 24709956 | 5       | .                  | .        | intergenic | 0.341  | rs789729137   | 2 |
| AAC.GTT     | 12 | 24932985 | 24933000 | 5.33333 | .                  | .        | intergenic | -0.141 | rs789750965   | 2 |

|              |    |          |          |         |                    |            |            |        |             |        |   |
|--------------|----|----------|----------|---------|--------------------|------------|------------|--------|-------------|--------|---|
| AC.GT        | 12 | 25144760 | 25144781 | 11      | .                  | .          | intergenic | .      | 389849      | rs7884 | 2 |
| AC.GT        | 12 | 25186685 | 25186698 | 7       | ENSSSCT00000022825 | .          | intron     | .      | .           | .      | 4 |
| AC.GT        | 12 | 25796529 | 25796539 | 5.5     | .                  | .          | intergenic | 0.511  | 748609      | rs7929 | 2 |
| AAAAC.GTTTT  | 12 | 25831965 | 25831986 | 4.4     | ENSSSCT00000030769 | .          | intron     | 0.233  | rs786842842 |        | 2 |
| AAAT.ATTT    | 12 | 25967341 | 25967358 | 4.5     | .                  | .          | intergenic | 0.296  | rs790825254 |        | 2 |
| AT.AT        | 12 | 25984950 | 25984965 | 8       | ENSSSCT00000019107 | KAT7       | intron     | 0.333  | rs789977908 |        | 2 |
| AGG.CCT      | 12 | 26067776 | 26067790 | 5       | .                  | .          | intergenic | 0.012  | rs791341717 |        | 2 |
| AC.GT        | 12 | 27185680 | 27185693 | 7       | .                  | .          | intergenic | .      | 357943      | rs7895 | 2 |
| AAAAT.ATTTT  | 12 | 27194261 | 27194281 | 4.2     | .                  | .          | intergenic | -0.154 | rs788710853 |        | 2 |
| AC.GT        | 12 | 27527051 | 27527060 | 5       | ENSSSCT00000019153 | MBTD1      | intron     | 0.08   | 336363      | rs7884 | 2 |
| AG.CT        | 12 | 27860823 | 27860848 | 13      | .                  | .          | intergenic | .      | rs790064443 |        | 3 |
| AT.AT        | 12 | 28230612 | 28230626 | 7.5     | .                  | .          | intergenic | .      | 559157      | rs7871 | 2 |
| AAATG.CATTT  | 12 | 28258058 | 28258101 | 8.8     | .                  | .          | intergenic | .      | 519409      | rs7924 | 2 |
| AAC.GTT      | 12 | 28460147 | 28460160 | 4.66667 | .                  | .          | intergenic | -0.082 | 153982      | rs7910 | 2 |
| AC.GT        | 12 | 28466762 | 28466775 | 7       | .                  | .          | intergenic | 0.839  | rs790559473 |        | 2 |
| AG.CT        | 12 | 28493260 | 28493302 | 21.5    | .                  | .          | intergenic | -0.163 | .           |        | 2 |
| AAAAAC.GTTTT | 12 | 28506123 | 28506144 | 3.66667 | .                  | .          | intergenic | 0.005  | rs788485916 |        | 2 |
| AT.AT        | 12 | 28537583 | 28537592 | 5       | .                  | .          | intergenic | 0.041  | .           |        | 2 |
| AG.CT        | 12 | 28631466 | 28631479 | 7       | .                  | .          | intergenic | -0.117 | rs789654058 |        | 4 |
| AT.AT        | 12 | 28638193 | 28638203 | 5.5     | .                  | .          | intergenic | 0.007  | rs793270913 |        | 2 |
| AG.CT        | 12 | 28693427 | 28693436 | 5       | .                  | .          | intergenic | .      | .           |        | 4 |
| AAAC.GTTT    | 12 | 29249064 | 29249093 | 7.5     | .                  | .          | intergenic | 0.018  | 397706      | rs7871 | 3 |
| AAAC.GTTT    | 12 | 29250638 | 29250655 | 4.5     | .                  | .          | intergenic | 0.146  | rs787725711 |        | 2 |
| AAG.CTT      | 12 | 29608147 | 29608163 | 5.66667 | .                  | .          | intergenic | .      | rs701620606 |        | 2 |
| AG.CT        | 12 | 29684077 | 29684089 | 6.5     | .                  | .          | intergenic | .      | rs789207399 |        | 2 |
| AAC.GTT      | 12 | 30203681 | 30203695 | 5       | .                  | .          | intergenic | .      | .           |        | 2 |
| AC.GT        | 12 | 30765123 | 30765142 | 10      | .                  | .          | intergenic | -0.171 | .           |        | 4 |
| AAC.GTT      | 12 | 30872794 | 30872816 | 7.66667 | .                  | .          | intergenic | -0.321 | 329748      | rs7923 | 2 |
| AT.AT        | 12 | 31140567 | 31140576 | 5       | .                  | .          | intergenic | .      | rs789612612 |        | 3 |
| AATG.CATT    | 12 | 31228906 | 31228927 | 5.5     | .                  | .          | intergenic | -0.038 | rs791181123 |        | 2 |
| AC.GT        | 12 | 31591223 | 31591240 | 9       | .                  | .          | intergenic | -0.035 | .           |        | 3 |
| AT.AT        | 12 | 31696961 | 31696978 | 9       | ENSSSCT00000019162 | TOM1L1     | intron     | 0.908  | rs792154637 |        | 2 |
| AT.AT        | 12 | 31696961 | 31696978 | 9       | ENSSSCT00000031451 | TOM1L1     | intron     | 0.908  | rs792154637 |        | 2 |
| AT.AT        | 12 | 31704792 | 31704812 | 10.5    | ENSSSCT00000019162 | TOM1L1     | intron     | 0.069  | .           |        | 4 |
| AT.AT        | 12 | 31704792 | 31704812 | 10.5    | ENSSSCT00000031451 | TOM1L1     | intron     | 0.069  | .           |        | 4 |
| AAG.CTT      | 12 | 31713654 | 31713667 | 4.66667 | ENSSSCT00000019162 | TOM1L1     | intron     | .      | rs789690233 |        | 2 |
| AAG.CTT      | 12 | 31713654 | 31713667 | 4.66667 | ENSSSCT00000031451 | TOM1L1     | intron     | .      | rs789690233 |        | 2 |
| AAAC.GTTT    | 12 | 32180681 | 32180697 | 4.25    | .                  | .          | intergenic | 0.489  | rs788878701 |        | 2 |
| AAAC.GTTT    | 12 | 32322834 | 32322853 | 5       | .                  | .          | intergenic | -0.158 | rs791492486 |        | 2 |
| AC.GT        | 12 | 32514008 | 32514033 | 13      | .                  | .          | intergenic | 0.069  | rs792459905 |        | 2 |
| AAAAC.GTTTT  | 12 | 32598156 | 32598180 | 5       | .                  | .          | intergenic | .      | rs701326797 |        | 2 |
| AAG.CTT      | 12 | 32618212 | 32618232 | 7       | .                  | .          | intergenic | 0.053  | rs712737905 |        | 2 |
| AAAAAT.ATTTT | 12 | 32693149 | 32693166 | 3       | .                  | .          | intergenic | .      | rs786246456 |        | 2 |
| AATG.CATT    | 12 | 33227193 | 33227210 | 4.5     | .                  | .          | intergenic | 0.07   | rs706132842 |        | 2 |
| AAT.ATT      | 12 | 33295024 | 33295039 | 5.33333 | .                  | .          | intergenic | 0.065  | rs791707497 |        | 4 |
| AAG.CTT      | 12 | 33499875 | 33499887 | 4.33333 | ENSSSCT00000019171 | ANKFN1     | intron     | .      | rs786550046 |        | 2 |
| AC.GT        | 12 | 33945689 | 33945703 | 7.5     | ENSSSCT00000034924 | C17orf67   | intron     | -0.227 | 349169      | rs7936 | 3 |
| AC.GT        | 12 | 34001817 | 34001827 | 5.5     | ENSSSCT00000019179 | SCPEP1     | intron     | 0.783  | 113477      | rs7871 | 3 |
| AAAT.ATTT    | 12 | 34112515 | 34112535 | 5.25    | ENSSSCT00000019177 | DGKE       | intron     | -0.153 | rs790167855 |        | 2 |
| AGG.CCT      | 12 | 34703358 | 34703372 | 5       | .                  | .          | intergenic | 0.251  | rs790467068 |        | 2 |
| AAAC.GTTT    | 12 | 35029108 | 35029122 | 3.75    | .                  | .          | intergenic | 0.47   | rs787488879 |        | 2 |
| AC.GT        | 12 | 35386959 | 35386972 | 7       | ENSSSCT00000027876 | DYNLL2     | intron     | 0.214  | .           |        | 2 |
| AAGC.GCTT    | 12 | 35840318 | 35840330 | 3.25    | .                  | .          | intergenic | .      | rs791503096 |        | 2 |
| AT.AT        | 12 | 35881938 | 35881949 | 6       | ENSSSCT00000019208 | TEX14      | intron     | 0.273  | rs790322415 |        | 2 |
| AT.AT        | 12 | 35881938 | 35881949 | 6       | ENSSSCT00000019209 | TEX14      | intron     | 0.273  | rs790322415 |        | 2 |
| AAAC.GTTT    | 12 | 36028941 | 36028959 | 4.75    | ENSSSCT00000035676 | 4-Sep      | promoter   | 0.403  | rs793729884 |        | 2 |
| AAAC.GTTT    | 12 | 36028941 | 36028959 | 4.75    | ENSSSCT00000035025 | 4-Sep      | promoter   | 0.403  | rs793729884 |        | 2 |
| AAAC.GTTT    | 12 | 36545469 | 36545495 | 6.75    | ENSSSCT00000033129 | TRIM37     | intron     | 0.319  | rs786418078 |        | 2 |
| AAAC.GTTT    | 12 | 36545469 | 36545495 | 6.75    | ENSSSCT00000024586 | TRIM37     | intron     | 0.319  | rs786418078 |        | 2 |
| AAAC.GTTT    | 12 | 36684039 | 36684059 | 5.25    | .                  | .          | intergenic | .      | rs793141766 |        | 2 |
| AAAT.ATTT    | 12 | 36687870 | 36687884 | 3.75    | .                  | .          | intergenic | 0.328  | .           |        | 4 |
| AAAC.GTTT    | 12 | 36725812 | 36725827 | 4       | .                  | .          | intergenic | 0.147  | 361001      | rs7883 | 2 |
| AAAAC.GTTTT  | 12 | 36742404 | 36742432 | 5.8     | .                  | .          | intergenic | -0.038 | rs789014010 |        | 2 |
| AAGC.GCTT    | 12 | 36934513 | 36934533 | 5.25    | ENSSSCT00000027408 | GDPD1      | intron     | .      | 304215      | rs7921 | 2 |
| AAAT.ATTT    | 12 | 36938172 | 36938190 | 4.75    | ENSSSCT00000027408 | GDPD1      | intron     | .      | rs792667601 |        | 2 |
| AAC.GTT      | 12 | 37055851 | 37055864 | 4.66667 | ENSSSCT00000026532 | PRR11      | intron     | 0.161  | 511715      | rs7894 | 2 |
| AAATT.AATTT  | 12 | 37164709 | 37164732 | 4.8     | .                  | .          | intergenic | .      | rs792732175 |        | 2 |
| AAAAG.CTTTT  | 12 | 37316378 | 37316405 | 5.6     | ENSSSCT00000019232 | ssc-mir-21 | intron     | 0.279  | rs786524572 |        | 2 |
| AT.AT        | 12 | 37331185 | 37331206 | 11      | ENSSSCT00000019232 | ssc-mir-21 | intron     | .      | 763270      | rs7908 | 2 |
| AAAAG.CTTTT  | 12 | 37361871 | 37361893 | 4.6     | ENSSSCT00000019233 | TUBD1      | intron     | .      | rs790157563 |        | 2 |
| AAC.GTT      | 12 | 37592850 | 37592864 | 5       | .                  | .          | intergenic | .      | 764395      | rs7912 | 2 |
| AT.AT        | 12 | 37707120 | 37707129 | 5       | ENSSSCT00000019236 | MED13      | intron     | .      | 7070560     | rs7907 | 2 |
| AT.AT        | 12 | 37707120 | 37707129 | 5       | ENSSSCT00000024721 | MED13      | intron     | .      | 7070560     | rs7907 | 2 |
| AT.AT        | 12 | 37742198 | 37742207 | 5       | ENSSSCT00000019238 | .          | intron     | 2.268  | rs791722157 |        | 2 |
| AAAC.GTTT    | 12 | 37996370 | 37996390 | 5.25    | .                  | .          | intergenic | .      | 364869      | rs7930 | 2 |
| AG.CT        | 12 | 38451809 | 38451823 | 7.5     | .                  | .          | intergenic | .      | rs793578196 |        | 2 |
| AAT.ATT      | 12 | 38487306 | 38487336 | 10.3333 | .                  | .          | intergenic | 0.263  | 383077      | rs7862 | 2 |
| AAAAC.GTTTT  | 12 | 38538113 | 38538144 | 6.4     | .                  | .          | intergenic | 0.226  | rs787509228 |        | 2 |
| AAC.GTT      | 12 | 38539045 | 38539058 | 4.66667 | .                  | .          | intergenic | 0.105  | .           |        | 2 |
| AG.CT        | 12 | 38559044 | 38559053 | 5       | .                  | .          | intergenic | 1.567  | rs791757850 |        | 2 |
| AC.GT        | 12 | 38575375 | 38575393 | 9.5     | .                  | .          | intergenic | -0.092 | rs792209293 |        | 3 |
| AAC.GTT      | 12 | 38582480 | 38582501 | 7.33333 | .                  | .          | intergenic | 1.471  | rs793134338 |        | 2 |
| AAAT.ATTT    | 12 | 38653005 | 38653032 | 7       | ENSSSCT00000019240 | BCAS3      | intron     | -0.065 | rs789984582 |        | 4 |
| AT.AT        | 12 | 38677341 | 38677350 | 5       | ENSSSCT00000019240 | BCAS3      | intron     | 0.146  | rs792459785 |        | 2 |

|             |    |          |          |         |                    |           |            |        |        |                |   |
|-------------|----|----------|----------|---------|--------------------|-----------|------------|--------|--------|----------------|---|
| AAAC.GTTT   | 12 | 38741107 | 38741133 | 6.75    | ENSSSCT00000019240 | BCAS3     | intron     | -0.102 | 327388 | rs7909         | 2 |
| ACAT.ATGT   | 12 | 38752023 | 38752053 | 7.75    | ENSSSCT00000019240 | BCAS3     | intron     | 0.161  | 117082 | rs7870         | 3 |
| AAAC.GTTT   | 12 | 38785982 | 38786003 | 5.5     | ENSSSCT00000019240 | BCAS3     | intron     | .      |        | rs788279875    | 2 |
| AT.AT       | 12 | 38859892 | 38859907 | 8       | ENSSSCT00000019240 | BCAS3     | intron     | 0.184  |        | rs790975632    | 2 |
| AAAG.CTTT   | 12 | 39051837 | 39051857 | 5.25    | .                  | .         | intergenic | .      |        | rs789610886    | 2 |
| AGG.CCT     | 12 | 39453175 | 39453205 | 10.3333 | .                  | .         | intergenic | .      |        |                | 2 |
| AAAT.ATTT   | 12 | 39590462 | 39590476 | 3.75    | ENSSSCT00000032517 | ZNHIT3    | promoter   | -0.017 |        |                | 2 |
| AAAAC.GTTTT | 12 | 39744686 | 39744700 | 3       | ENSSSCT00000019255 | MRM1      | intron     | 0.224  | 709855 | rs7899         | 2 |
| AC.GT       | 12 | 39799779 | 39799789 | 5.5     | .                  | .         | intergenic | 1.539  |        | rs793104148    | 4 |
| AATG.CATT   | 12 | 39836954 | 39836974 | 5.25    | .                  | .         | intergenic | 0.464  |        | rs790317292    | 4 |
| AC.GT       | 12 | 39843919 | 39843944 | 13      | .                  | .         | intergenic | 1.644  |        | rs791084697    | 2 |
| AGGC.GCCT   | 12 | 39923448 | 39923464 | 4.25    | .                  | .         | intergenic | -0.023 |        | rs791517462    | 2 |
| AAAG.CTTT   | 12 | 39940428 | 39940441 | 3.5     | .                  | .         | intergenic | .      |        | rs788954969    | 2 |
| AAAC.GTTT   | 12 | 40149335 | 40149358 | 6       | ENSSSCT00000019257 | AATF      | intron     | 1.132  |        | rs786900806    | 2 |
| AAT.ATT     | 12 | 40176921 | 40176941 | 7       | ENSSSCT00000019257 | AATF      | intron     | 0.174  |        |                | 2 |
| AAAC.GTTT   | 12 | 40236718 | 40236732 | 3.75    | ENSSSCT00000019259 | ACACA     | intron     | 1.698  | 302047 | rs7914         | 2 |
| AC.GT       | 12 | 40239266 | 40239277 | 6       | ENSSSCT00000019259 | ACACA     | intron     | 0.272  |        | rs790869966    | 2 |
| AG.CT       | 12 | 40287688 | 40287698 | 5.5     | ENSSSCT00000019259 | ACACA     | intron     | 0.642  |        | rs790746766    | 2 |
| AAAAC.GTTTT | 12 | 40381313 | 40381329 | 4.25    | .                  | .         | intergenic | .      |        | 746257 rs7896  | 2 |
| AC.GT       | 12 | 40390180 | 40390192 | 6.5     | .                  | .         | intergenic | 0.159  |        | rs704531194    | 2 |
| AG.CT       | 12 | 40610670 | 40610679 | 5       | ENSSSCT00000029194 | DUSP14    | intron     | .      |        |                | 3 |
| AAAT.ATTT   | 12 | 40624183 | 40624204 | 5.5     | ENSSSCT00000028499 | SYNRG     | intron     | .      |        |                | 3 |
| AC.GT       | 12 | 40882274 | 40882288 | 7.5     | .                  | .         | intergenic | 0.207  | 328102 | rs7910         | 2 |
| AGG.CCT     | 12 | 41052856 | 41052868 | 4.33333 | ENSSSCT00000019265 | .         | promoter   | -0.202 |        | rs792544423    | 2 |
| AG.CT       | 12 | 41124840 | 41124852 | 6.5     | .                  | .         | intergenic | .      |        | rs791703721    | 2 |
| AAAAC.GTTTT | 12 | 41203480 | 41203502 | 3.83333 | .                  | .         | intergenic | .      |        | rs791339384    | 2 |
| AAAG.CTTT   | 12 | 41249894 | 41249909 | 4       | ENSSSCT00000019272 | C17orf66  | intron     | 0.114  |        | rs788461490    | 3 |
| AAAAC.GTTTT | 12 | 41288610 | 41288628 | 3.8     | .                  | .         | intergenic | .      |        | rs792372491    | 2 |
| AAAC.GTTT   | 12 | 41389243 | 41389274 | 8       | ENSSSCT00000019278 | .         | intron     | 0.265  |        | rs792957057    | 2 |
| AAC.GTT     | 12 | 41393894 | 41393908 | 5       | ENSSSCT00000019278 | .         | intron     | 0.383  | 336759 | rs7926         | 2 |
| AAAC.GTTT   | 12 | 41398945 | 41398957 | 3.25    | ENSSSCT00000019278 | .         | intron     | 0.393  |        | rs787885580    | 2 |
| AAAAC.GTTTT | 12 | 41611702 | 41611719 | 3.6     | .                  | .         | intergenic | 0.347  |        | rs786542148    | 2 |
| AC.GT       | 12 | 41783363 | 41783377 | 7.5     | ENSSSCT00000027932 | .         | intron     | .      |        |                | 2 |
| AAAT.ATTT   | 12 | 41867355 | 41867377 | 5.75    | .                  | .         | intergenic | 0.541  | 371467 | rs7889         | 2 |
| ATC.GAT     | 12 | 42198817 | 42198828 | 4       | .                  | .         | intergenic | -0.127 |        |                | 2 |
| AC.GT       | 12 | 42217457 | 42217477 | 10.5    | .                  | .         | intergenic | 0.409  |        | rs698586585    | 2 |
| AAAC.GTTT   | 12 | 42421066 | 42421083 | 4.5     | .                  | .         | intergenic | -0.249 |        | rs786992900    | 2 |
| AG.CT       | 12 | 42671223 | 42671232 | 5       | .                  | .         | intergenic | -0.132 | 275417 | rs7920         | 2 |
| AAAC.GTTT   | 12 | 42890016 | 42890042 | 6.75    | .                  | .         | intergenic | 0.169  |        | rs791350412    | 2 |
| AT.AT       | 12 | 43011533 | 43011544 | 6       | .                  | .         | intergenic | .      |        | rs792905070    | 2 |
| AC.GT       | 12 | 43078544 | 43078567 | 12      | .                  | .         | intergenic | -0.158 | 215089 | rs7876         | 2 |
| AAAC.GTTT   | 12 | 43094947 | 43094963 | 4.25    | .                  | .         | intergenic | 0.41   |        | rs788078807    | 2 |
| AG.CT       | 12 | 43402482 | 43402500 | 9.5     | .                  | .         | intergenic | 0.112  |        | rs791162974    | 2 |
| AC.GT       | 12 | 43464270 | 43464309 | 20      | .                  | .         | intergenic | 0.174  |        | rs793463094    | 4 |
| AAAC.GTTT   | 12 | 43983327 | 43983339 | 3.25    | ENSSSCT00000019295 | MYO1D     | intron     | -0.082 |        | rs789967368    | 2 |
| AT.AT       | 12 | 44127207 | 44127217 | 5.5     | ENSSSCT00000019295 | MYO1D     | intron     | 0.183  |        | rs698222345    | 5 |
| AC.GT       | 12 | 44138270 | 44138298 | 14.5    | .                  | .         | intergenic | .      |        |                | 4 |
| AG.CT       | 12 | 44327467 | 44327477 | 5.5     | .                  | .         | intergenic | .      |        | rs791026089    | 2 |
| AG.CT       | 12 | 44486173 | 44486185 | 6.5     | ENSSSCT00000019302 | RHOT1     | intron     | 0.384  |        | rs793276948    | 2 |
| AT.AT       | 12 | 44883637 | 44883652 | 8       | ENSSSCT00000019314 | COPRS     | intron     | 0.142  |        | rs788017689    | 2 |
| AATC.GATT   | 12 | 44976045 | 44976065 | 5.25    | .                  | .         | intergenic | 0.204  | 307136 | rs7927         | 2 |
| AAAC.GTTT   | 12 | 44989176 | 44989193 | 4.5     | .                  | .         | intergenic | -0.132 |        | rs792093192    | 2 |
| AGG.CCT     | 12 | 45011709 | 45011746 | 12.6667 | .                  | .         | intergenic | .      |        | rs696607077    | 2 |
| AC.GT       | 12 | 45052019 | 45052029 | 5.5     | .                  | .         | intergenic | 0.101  |        | rs786393542    | 2 |
| AAAAC.GTTTT | 12 | 45062633 | 45062649 | 3.4     | .                  | .         | intergenic | 0.002  |        | rs792811989    | 2 |
| AAAC.GTTT   | 12 | 45110917 | 45110933 | 4.25    | .                  | .         | intergenic | .      |        | 111335 rs7904  | 4 |
| AAAC.GTTT   | 12 | 45121283 | 45121314 | 8       | .                  | .         | intergenic | 0.007  |        | rs787259524    | 2 |
| AGGGC.GCCCT | 12 | 45150048 | 45150063 | 3.2     | .                  | .         | intergenic | -0.121 | 321165 | rs7895         | 2 |
| AACC.GGTT   | 12 | 45294222 | 45294241 | 5       | ENSSSCT00000019316 | RAB11FIP4 | intron     | -0.269 |        | rs793293142    | 2 |
| AATG.CATT   | 12 | 45377650 | 45377672 | 5.75    | ENSSSCT00000023079 | NF1       | intron     | 0.08   |        | rs787406297    | 3 |
| AATG.CATT   | 12 | 45377650 | 45377672 | 5.75    | ENSSSCT00000019317 | NF1       | intron     | 0.08   |        | rs787406297    | 3 |
| AT.AT       | 12 | 45473082 | 45473093 | 6       | ENSSSCT00000023079 | NF1       | intron     | 0.162  |        |                | 3 |
| AT.AT       | 12 | 45473082 | 45473093 | 6       | ENSSSCT00000019317 | NF1       | intron     | 0.162  |        |                | 3 |
| AAAC.GTTT   | 12 | 45480355 | 45480391 | 9.25    | ENSSSCT00000023079 | NF1       | intron     | .      |        | rs791397445    | 2 |
| AAAC.GTTT   | 12 | 45480355 | 45480391 | 9.25    | ENSSSCT00000019317 | NF1       | intron     | .      |        | rs791397445    | 2 |
| AAAT.ATTT   | 12 | 45546826 | 45546839 | 3.5     | .                  | .         | intergenic | .      |        | 388342 rs7925  | 2 |
| AAAT.ATTT   | 12 | 45607586 | 45607601 | 4       | .                  | .         | intergenic | .      |        | rs786458511    | 2 |
| AAAAC.GTTTT | 12 | 46172195 | 46172214 | 3.33333 | .                  | .         | intergenic | 0.667  | 335853 | rs7881         | 2 |
| AAAG.CTTT   | 12 | 46247574 | 46247599 | 6.5     | .                  | .         | intergenic | 0.227  |        | rs788360378    | 2 |
| AC.GT       | 12 | 46287149 | 46287171 | 11.5    | ENSSSCT00000030105 | NLK       | intron     | 0.309  |        | rs79798 rs7926 | 4 |
| AT.AT       | 12 | 46294405 | 46294415 | 5.5     | ENSSSCT00000030105 | NLK       | intron     | 0.33   |        |                | 2 |
| AC.GT       | 12 | 46401794 | 46401803 | 5       | ENSSSCT00000030105 | NLK       | intron     | .      |        | rs790209380    | 2 |
| AAAT.ATTT   | 12 | 46831894 | 46831906 | 3.25    | ENSSSCT00000019329 | SPAG5     | intron     | .      |        | 73846 rs7876   | 2 |
| AAAAC.GTTTT | 12 | 47121489 | 47121522 | 5.66667 | ENSSSCT00000019351 | PHF12     | intron     | 0.177  |        | rs793198860    | 2 |
| AAT.ATT     | 12 | 47200394 | 47200410 | 5.66667 | .                  | .         | intergenic | 0.466  |        | rs792511012    | 2 |
| AAAT.ATTT   | 12 | 47458769 | 47458787 | 4.75    | ENSSSCT00000019357 | NUFIP2    | promoter   | 1.779  | 367108 | rs7925         | 2 |
| AAC.GTT     | 12 | 47489387 | 47489400 | 4.66667 | .                  | .         | intergenic | 0.467  |        |                | 2 |
| AAAAC.GTTTT | 12 | 47507605 | 47507635 | 6.2     | .                  | .         | intergenic | .      |        | 332058 rs7904  | 2 |
| AAAC.GTTT   | 12 | 47620086 | 47620101 | 4       | ENSSSCT00000019362 | .         | intron     | .      |        | rs788409646    | 2 |
| AAAC.GTTT   | 12 | 47842712 | 47842734 | 5.75    | ENSSSCT00000033840 | SSH2      | intron     | 1.882  |        | rs793172005    | 2 |
| AAAC.GTTT   | 12 | 47842712 | 47842734 | 5.75    | ENSSSCT00000019363 | SSH2      | intron     | 1.882  |        | rs793172005    | 2 |
| AAAC.GTTT   | 12 | 47842712 | 47842734 | 5.75    | ENSSSCT00000034147 | SSH2      | intron     | 1.882  |        | rs793172005    | 2 |
| AC.GT       | 12 | 48030886 | 48030899 | 7       | .                  | .         | intergenic | 0.29   |        | rs789635737    | 2 |
| AG.CT       | 12 | 48303667 | 48303677 | 5.5     | ENSSSCT00000019366 | EFCAB5    | intron     | 0.416  | 329311 | rs7927         | 2 |

|             |    |          |          |         |                    |          |            |        |              |   |
|-------------|----|----------|----------|---------|--------------------|----------|------------|--------|--------------|---|
| ACC.GGT     | 12 | 48435141 | 48435152 | 4       | ENSSSCT00000019366 | EFCAB5   | intron     | 0.237  | rs790684128  | 2 |
| AAT.ATT     | 12 | 48675911 | 48675939 | 9.66667 | ENSSSCT00000036665 | GOSR1    | intron     | 0.32   | rs7905485348 | 2 |
| AAT.ATT     | 12 | 48675911 | 48675939 | 9.66667 | ENSSSCT00000030283 | GOSR1    | intron     | 0.32   | rs7905485348 | 2 |
| AC.GT       | 12 | 48866081 | 48866121 | 20.5    | .                  | .        | intergenic | 0.123  | rs7891137784 | 2 |
| AAAC.GTTT   | 12 | 49295671 | 49295690 | 5       | .                  | .        | intergenic | .      | rs793286927  | 2 |
| AAAT.ATTT   | 12 | 49431364 | 49431377 | 3.5     | ENSSSCT00000019386 | VPS53    | intron     | -0.122 | rs792616556  | 2 |
| AAAC.GTTT   | 12 | 49964320 | 49964337 | 4.5     | .                  | .        | intergenic | 0.089  | rs790891720  | 2 |
| AC.GT       | 12 | 49988786 | 49988803 | 9       | .                  | .        | intergenic | 0.251  | rs7905362981 | 2 |
| AAAAC.GTTTT | 12 | 50055570 | 50055591 | 4.4     | ENSSSCT00000019401 | SMG6     | intron     | 0.198  | rs791273615  | 2 |
| AAAC.GTTT   | 12 | 50151382 | 50151396 | 3.75    | ENSSSCT00000019401 | SMG6     | intron     | 0.25   | .            | 2 |
| AT.AT       | 12 | 50181340 | 50181352 | 6.5     | ENSSSCT00000019401 | SMG6     | intron     | 0.228  | rs789830421  | 2 |
| AAAG.CTTT   | 12 | 50312479 | 50312503 | 6.25    | ENSSSCT00000019407 | .        | intron     | 0.234  | rs789489416  | 2 |
| AC.GT       | 12 | 50380701 | 50380716 | 8       | .                  | .        | intergenic | .      | rs786288043  | 4 |
| AG.CT       | 12 | 50500538 | 50500548 | 5.5     | ENSSSCT00000019411 | PAFAH1B1 | intron     | 1.283  | .            | 2 |
| AAC.GTT     | 12 | 50544675 | 50544691 | 5.66667 | ENSSSCT00000019409 | .        | intron     | .      | rs787401046  | 2 |
| AAC.GTT     | 12 | 50544675 | 50544691 | 5.66667 | ENSSSCT00000025005 | .        | intron     | .      | rs787401046  | 2 |
| AAAT.ATTT   | 12 | 50622498 | 50622521 | 6       | .                  | .        | intergenic | -0.085 | rs793320283  | 2 |
| AC.GT       | 12 | 50833317 | 50833333 | 8.5     | ENSSSCT00000019412 | RAP1GAP2 | intron     | 1.372  | rs7901334682 | 2 |
| AAG.CTT     | 12 | 50904772 | 50904783 | 4       | .                  | .        | intergenic | .      | rs788884371  | 2 |
| AC.GT       | 12 | 51061205 | 51061225 | 10.5    | .                  | .        | intergenic | .      | rs712730120  | 3 |
| AG.CT       | 12 | 51261121 | 51261136 | 8       | .                  | .        | intergenic | -0.088 | rs7896375180 | 2 |
| AGAT.ATCT   | 12 | 51284642 | 51284682 | 10.25   | ENSSSCT00000019432 | OR1K1    | promoter   | 0.161  | rs710759770  | 2 |
| AC.GT       | 12 | 51345393 | 51345404 | 6       | .                  | .        | intergenic | 0.021  | rs791672849  | 2 |
| AT.AT       | 12 | 51489369 | 51489379 | 5.5     | ENSSSCT00000019437 | ASPA     | intron     | 1.886  | rs7898239033 | 2 |
| AC.GT       | 12 | 51495388 | 51495397 | 5       | .                  | .        | intergenic | 0.612  | rs790218254  | 2 |
| AC.GT       | 12 | 51807567 | 51807580 | 7       | ENSSSCT00000035080 | ITGAE    | intron     | -0.085 | rs7896393147 | 2 |
| AC.GT       | 12 | 51807567 | 51807580 | 7       | ENSSSCT00000034272 | ITGAE    | intron     | -0.085 | rs7896393147 | 2 |
| AG.CT       | 12 | 51974585 | 51974599 | 7.5     | .                  | .        | intergenic | -0.067 | .            | 2 |
| AATT.AATT   | 12 | 52025159 | 52025178 | 5       | .                  | .        | intergenic | .      | .            | 2 |
| AC.GT       | 12 | 52255639 | 52255650 | 6       | ENSSSCT00000019455 | UBE2G1   | intron     | .      | rs7883346679 | 2 |
| AAAT.ATTT   | 12 | 52298112 | 52298126 | 3.75    | .                  | .        | intergenic | -0.033 | rs7897369347 | 2 |
| AC.GT       | 12 | 52432100 | 52432113 | 7       | ENSSSCT00000019457 | SPNS3    | intron     | -0.251 | .            | 2 |
| AAAC.GTTT   | 12 | 52533567 | 52533587 | 5.25    | ENSSSCT00000019461 | TEKT1    | intron     | .      | rs788102791  | 2 |
| AAG.CTT     | 12 | 52917085 | 52917099 | 5       | .                  | .        | intergenic | -0.083 | rs788256184  | 2 |
| AAG.CTT     | 12 | 53316721 | 53316738 | 6       | .                  | .        | intergenic | .      | rs791135501  | 2 |
| AAAG.CTTT   | 12 | 53432543 | 53432557 | 3.75    | .                  | .        | intergenic | .      | rs791605492  | 2 |
| AAC.GTT     | 12 | 53540751 | 53540767 | 5.66667 | .                  | .        | intergenic | 0.338  | rs789979757  | 2 |
| AAG.CTT     | 12 | 53747620 | 53747632 | 4.33333 | .                  | .        | intergenic | .      | rs789051959  | 2 |
| AAT.ATT     | 12 | 53946738 | 53946755 | 6       | .                  | .        | intergenic | .      | rs788622937  | 2 |
| AC.GT       | 12 | 54066487 | 54066501 | 7.5     | .                  | .        | intergenic | -0.029 | rs7884169178 | 2 |
| AAAAT.ATTTT | 12 | 54642280 | 54642296 | 3.4     | .                  | .        | intergenic | 0.006  | rs790632275  | 3 |
| AAAAT.ATTTT | 12 | 55927165 | 55927180 | 3.2     | ENSSSCT00000027166 | CTC1     | promoter   | 0.211  | rs789506559  | 2 |
| AAAAC.GTTT  | 12 | 56530287 | 56530305 | 3.8     | .                  | .        | intergenic | 0.383  | rs791171316  | 2 |
| AAC.GTT     | 12 | 56541639 | 56541651 | 4.33333 | .                  | .        | intergenic | -0.105 | rs792689631  | 2 |
| AAAAC.GTTTT | 12 | 56693943 | 56693962 | 4       | ENSSSCT00000019577 | PIK3R6   | intron     | 0.115  | rs7893141153 | 2 |
| AG.CT       | 12 | 57044577 | 57044596 | 10      | .                  | .        | intergenic | -0.049 | rs7913309108 | 2 |
| AC.GT       | 12 | 57247691 | 57247708 | 9       | .                  | .        | intergenic | 0.536  | rs7882155983 | 2 |
| AGGG.CCCT   | 12 | 57251861 | 57251874 | 3.5     | .                  | .        | intergenic | 0.124  | rs789857361  | 2 |
| AT.AT       | 12 | 57358858 | 57358876 | 9.5     | ENSSSCT00000019584 | USP43    | intron     | -0.123 | rs7872393808 | 3 |
| AATG.CATT   | 12 | 57572655 | 57572683 | 7.25    | .                  | .        | intergenic | -0.233 | rs78740873   | 2 |
| AAAT.ATTT   | 12 | 57636117 | 57636130 | 3.5     | .                  | .        | intergenic | -0.237 | rs791938622  | 3 |
| AAAAC.GTTT  | 12 | 57936488 | 57936507 | 4       | .                  | .        | intergenic | -0.081 | .            | 2 |
| AAC.GTT     | 12 | 58025266 | 58025284 | 6.33333 | .                  | .        | intergenic | .      | rs792865829  | 2 |
| AC.GT       | 12 | 58622338 | 58622350 | 6.5     | ENSSSCT00000031516 | .        | intron     | -0.165 | rs790830628  | 2 |
| AT.AT       | 12 | 58651517 | 58651527 | 5.5     | ENSSSCT00000031516 | .        | intron     | 0.234  | .            | 2 |
| AC.GT       | 12 | 58922908 | 58922922 | 7.5     | .                  | .        | intergenic | -0.307 | rs789141193  | 4 |
| AAATT.AATTT | 12 | 59135178 | 59135192 | 3       | .                  | .        | intergenic | 0.161  | rs792503636  | 2 |
| AAAC.GTTT   | 12 | 59141572 | 59141590 | 4.75    | .                  | .        | intergenic | .      | rs7904235694 | 2 |
| AAC.GTT     | 12 | 59154545 | 59154567 | 7.66667 | .                  | .        | intergenic | 1.098  | rs7874315865 | 3 |
| AAC.GTT     | 12 | 59243575 | 59243592 | 6       | ENSSSCT00000019610 | .        | intron     | 0.216  | rs7884302789 | 2 |
| AAC.GTT     | 12 | 59363735 | 59363746 | 4       | ENSSSCT00000019611 | MAP2K4   | intron     | 0.265  | rs793334950  | 2 |
| AAAC.GTTT   | 12 | 59598949 | 59598979 | 7.75    | .                  | .        | intergenic | 0.081  | rs7908381924 | 2 |
| AC.GT       | 12 | 59648689 | 59648699 | 5.5     | .                  | .        | intergenic | .      | rs7890317766 | 2 |
| AG.CT       | 12 | 60441140 | 60441153 | 7       | .                  | .        | intergenic | 0.027  | rs792830425  | 2 |
| AC.GT       | 12 | 60473048 | 60473068 | 10.5    | .                  | .        | intergenic | -0.159 | rs791730749  | 2 |
| AT.AT       | 12 | 60535724 | 60535734 | 5.5     | .                  | .        | intergenic | 0.093  | rs789907191  | 2 |
| AAACC.GGTTT | 12 | 60804993 | 60805014 | 4.4     | .                  | .        | intergenic | -0.095 | rs787746681  | 2 |
| AC.GT       | 12 | 60824865 | 60824888 | 12      | .                  | .        | intergenic | -0.025 | rs7903307293 | 2 |
| AAC.GTT     | 12 | 61567027 | 61567051 | 8.33333 | .                  | .        | intergenic | 0.046  | .            | 2 |
| ACC.GGT     | 12 | 61617124 | 61617140 | 5.66667 | .                  | .        | intergenic | -0.244 | rs788355862  | 2 |
| AAGG.CCTT   | 12 | 61764919 | 61764937 | 4.75    | .                  | .        | intergenic | -0.058 | rs7897326002 | 2 |
| AAAG.CTTT   | 12 | 61993853 | 61993867 | 3.75    | .                  | .        | intergenic | .      | rs792563320  | 2 |
| AAAAG.CTTTT | 12 | 62134942 | 62134963 | 4.4     | .                  | .        | intergenic | .      | rs788670008  | 2 |
| AC.GT       | 12 | 62457880 | 62457897 | 9       | ENSSSCT00000019634 | NCOR1    | intron     | -0.082 | .            | 2 |
| AC.GT       | 12 | 62532845 | 62532873 | 14.5    | ENSSSCT00000019634 | NCOR1    | intron     | -0.114 | .            | 2 |
| AC.GT       | 12 | 62725893 | 62725911 | 9.5     | ENSSSCT00000019641 | SLC47A1  | intron     | .      | .            | 2 |
| AAC.GTT     | 12 | 62925204 | 62925218 | 5       | .                  | .        | intergenic | .      | rs788281346  | 2 |
| AC.GT       | 12 | 63083567 | 63083583 | 8.5     | .                  | .        | intergenic | .      | rs7885794969 | 2 |
| AAAC.GTTT   | 12 | 63428133 | 63428150 | 4.5     | .                  | .        | intergenic | 0.004  | rs790542815  | 2 |
| AAC.GTT     | 13 | 39146    | 39170    | 8.33333 | .                  | .        | intergenic | .      | rs790008254  | 4 |
| AAAG.CTTT   | 13 | 105570   | 105584   | 3.75    | .                  | .        | intergenic | .      | rs790254515  | 3 |
| AC.GT       | 13 | 500072   | 500086   | 7.5     | ENSSSCT00000029249 | .        | intron     | .      | rs792810317  | 2 |
| CACTC.GAGTG | 13 | 518521   | 518549   | 4.83333 | .                  | .        | intergenic | 0.215  | rs7900343350 | 2 |
| AC.GT       | 13 | 599873   | 599890   | 9       | ENSSSCT00000033415 | CPNE4    | intron     | 0.295  | .            | 4 |

|              |    |          |          |         |                    |         |            |        |               |   |
|--------------|----|----------|----------|---------|--------------------|---------|------------|--------|---------------|---|
| AC.GT        | 13 | 599873   | 599890   | 9       | ENSSSCT00000012241 | CPNE4   | intron     | 0.295  | .             | 4 |
| AAAT.ATTT    | 13 | 820512   | 820530   | 4.75    | .                  | .       | intergenic | .      | rs793535439   | 2 |
| AAAAC.GTTTT  | 13 | 1129743  | 1129773  | 5.16667 | ENSSSCT00000012246 | ATP2C1  | intron     | 0.032  | 344126 rs7864 | 2 |
| AT.AT        | 13 | 1203798  | 1203810  | 6.5     | ENSSSCT00000012246 | ATP2C1  | intron     | .      | 193548 rs7921 | 2 |
| AG.CT        | 13 | 1258937  | 1258947  | 5.5     | .                  | .       | intergenic | 0.618  | .             | 2 |
| AG.CT        | 13 | 1314683  | 1314702  | 10      | .                  | .       | intergenic | -0.155 | rs789654903   | 3 |
| AG.CT        | 13 | 1379723  | 1379732  | 5       | .                  | .       | intergenic | 0.289  | rs791633651   | 3 |
| AAAC.GTTT    | 13 | 1551721  | 1551734  | 3.5     | .                  | .       | intergenic | -0.047 | rs791994657   | 2 |
| AT.AT        | 13 | 1844201  | 1844231  | 15.5    | ENSSSCT00000012249 | COL6A5  | intron     | 0.103  | 394311 rs7913 | 2 |
| AAAT.ATTT    | 13 | 1859405  | 1859420  | 4       | ENSSSCT00000012249 | COL6A5  | intron     | 0.852  | rs789354620   | 2 |
| AC.GT        | 13 | 1873879  | 1873891  | 6.5     | ENSSSCT00000012249 | COL6A5  | intron     | 0.087  | .             | 3 |
| AG.CT        | 13 | 1885079  | 1885093  | 7.5     | .                  | .       | intergenic | .      | rs790708406   | 3 |
| AAAT.ATTT    | 13 | 2040367  | 2040386  | 5       | .                  | .       | intergenic | .      | rs788789861   | 2 |
| AAAAT.ATTTT  | 13 | 2461221  | 2461252  | 6.4     | ENSSSCT00000032548 | SH3BP5  | intron     | -0.108 | rs787533892   | 2 |
| AAAC.GTTT    | 13 | 2559642  | 2559655  | 3.5     | .                  | .       | intergenic | .      | rs792967134   | 3 |
| AAAT.ATTT    | 13 | 3120540  | 3120554  | 3.75    | ENSSSCT00000012259 | ANKRD28 | intron     | 0.194  | rs790320256   | 2 |
| AAAC.GTTT    | 13 | 3139849  | 3139895  | 11.75   | ENSSSCT00000012259 | ANKRD28 | intron     | 0.048  | 340974 rs7902 | 2 |
| AAAC.GTTT    | 13 | 3147930  | 3147947  | 4.5     | ENSSSCT00000012259 | ANKRD28 | intron     | 0.181  | rs793117341   | 2 |
| AAAAG.CTTTT  | 13 | 3168080  | 3168098  | 3.8     | ENSSSCT00000012259 | ANKRD28 | intron     | .      | 359180 rs7902 | 2 |
| AAAAC.GTTTT  | 13 | 3263899  | 3263921  | 4.6     | .                  | .       | intergenic | .      | rs788376436   | 2 |
| AT.AT        | 13 | 3266147  | 3266157  | 5.5     | .                  | .       | intergenic | .      | .             | 4 |
| AATT.AATT    | 13 | 3309997  | 3310011  | 3.75    | .                  | .       | intergenic | .      | rs789013397   | 2 |
| AAAT.ATTT    | 13 | 3360831  | 3360846  | 4       | .                  | .       | intergenic | 0.154  | 394961 rs7935 | 2 |
| AC.GT        | 13 | 3681161  | 3681171  | 5.5     | .                  | .       | intergenic | 0.41   | rs791505356   | 2 |
| AAAAC.GTTTT  | 13 | 3884788  | 3884808  | 4.2     | .                  | .       | intergenic | 0.057  | rs790731392   | 2 |
| AAAC.GTTT    | 13 | 4222431  | 4222453  | 5.75    | .                  | .       | intergenic | 0.136  | 218848 rs7909 | 2 |
| AAAAAT.ATTTT | 13 | 4350184  | 4350204  | 3.5     | .                  | .       | intergenic | -0.059 | rs793254451   | 2 |
| AAAC.GTTT    | 13 | 4614734  | 4614748  | 3.75    | ENSSSCT00000012264 | TBC1D5  | intron     | 0.408  | rs790715038   | 2 |
| AAAC.GTTT    | 13 | 4614734  | 4614748  | 3.75    | ENSSSCT00000012265 | TBC1D5  | intron     | 0.408  | rs790715038   | 2 |
| AAAAC.GTTTT  | 13 | 4709792  | 4709812  | 4.2     | ENSSSCT00000012264 | TBC1D5  | intron     | 0.145  | rs793804749   | 2 |
| AAAAC.GTTTT  | 13 | 4709792  | 4709812  | 4.2     | ENSSSCT00000012265 | TBC1D5  | intron     | 0.145  | rs793804749   | 2 |
| AAAC.GTTT    | 13 | 4767890  | 4767911  | 5.5     | ENSSSCT00000012264 | TBC1D5  | intron     | 0.102  | rs787642185   | 4 |
| AAAC.GTTT    | 13 | 4767890  | 4767911  | 5.5     | ENSSSCT00000012265 | TBC1D5  | intron     | 0.102  | rs787642185   | 4 |
| AAAAT.ATTTT  | 13 | 5102173  | 5102188  | 3.2     | .                  | .       | intergenic | 0.3    | 375718 rs7863 | 2 |
| AAAG.CTTT    | 13 | 5507943  | 5507959  | 4.25    | .                  | .       | intergenic | 0.425  | 376534 rs7874 | 2 |
| AC.GT        | 13 | 5785976  | 5786008  | 16.5    | .                  | .       | intergenic | 0.113  | 301165 rs7922 | 3 |
| AT.AT        | 13 | 5808278  | 5808288  | 5.5     | .                  | .       | intergenic | 0.471  | rs792279375   | 4 |
| AAT.ATT      | 13 | 5909329  | 5909344  | 5.33333 | .                  | .       | intergenic | .      | .             | 2 |
| AAAT.ATTT    | 13 | 6047996  | 6048010  | 3.75    | ENSSSCT00000012267 | SATB1   | intron     | -0.241 | rs792776629   | 2 |
| AC.GT        | 13 | 6148248  | 6148263  | 8       | .                  | .       | intergenic | 0.207  | .             | 2 |
| AT.AT        | 13 | 6544587  | 6544615  | 14.5    | .                  | .       | intergenic | -0.09  | 272536 rs7894 | 2 |
| AAAT.ATTT    | 13 | 6603564  | 6603581  | 4.5     | .                  | .       | intergenic | 0.416  | rs793343215   | 2 |
| AC.GT        | 13 | 6691988  | 6692000  | 6.5     | .                  | .       | intergenic | -0.229 | rs793242763   | 2 |
| AG.CT        | 13 | 6783130  | 6783139  | 5       | .                  | .       | intergenic | 0.51   | rs786348939   | 2 |
| AC.GT        | 13 | 6894184  | 6894198  | 7.5     | .                  | .       | intergenic | -0.033 | 331236 rs7936 | 7 |
| AT.AT        | 13 | 7122707  | 7122716  | 5       | .                  | .       | intergenic | -0.108 | rs792159334   | 2 |
| AT.AT        | 13 | 7159836  | 7159854  | 9.5     | .                  | .       | intergenic | .      | 311652 rs7909 | 2 |
| AAAC.GTTT    | 13 | 7370956  | 7370970  | 3.75    | .                  | .       | intergenic | -0.087 | 425800 rs7894 | 2 |
| AG.CT        | 13 | 7373920  | 7373929  | 5       | .                  | .       | intergenic | 0.074  | .             | 3 |
| AAAC.GTTT    | 13 | 7446351  | 7446363  | 3.25    | ENSSSCT00000012270 | KCNH8   | intron     | 0.059  | rs786779855   | 2 |
| AT.AT        | 13 | 7469347  | 7469373  | 13.5    | ENSSSCT00000012270 | KCNH8   | intron     | 0.148  | .             | 2 |
| AAAT.ATTT    | 13 | 7737381  | 7737398  | 4.5     | ENSSSCT00000012271 | EFHB    | intron     | .      | rs787868331   | 2 |
| AAT.ATT      | 13 | 7754691  | 7754703  | 4.33333 | ENSSSCT00000012271 | EFHB    | intron     | 0.181  | rs709925234   | 2 |
| AC.GT        | 13 | 7758740  | 7758751  | 6       | ENSSSCT00000012271 | EFHB    | intron     | 0.594  | rs787086315   | 2 |
| ATC.GAT      | 13 | 8010418  | 8010432  | 5       | ENSSSCT00000024917 | KAT2B   | intron     | .      | rs793575345   | 2 |
| AG.CT        | 13 | 8033940  | 8033950  | 5.5     | ENSSSCT00000024917 | KAT2B   | intron     | -0.255 | rs789588750   | 3 |
| AC.GT        | 13 | 8140578  | 8140587  | 5       | .                  | .       | intergenic | .      | rs787232243   | 2 |
| AC.GT        | 13 | 8328347  | 8328357  | 5.5     | .                  | .       | intergenic | 0.044  | .             | 4 |
| AC.GT        | 13 | 8933057  | 8933066  | 5       | .                  | .       | intergenic | .      | rs791392229   | 3 |
| AAAC.GTTT    | 13 | 8933920  | 8933938  | 4.75    | .                  | .       | intergenic | .      | 312116 rs7887 | 2 |
| AG.CT        | 13 | 8935884  | 8935899  | 8       | .                  | .       | intergenic | -0.13  | 147951 rs7871 | 2 |
| ACAG.CTGT    | 13 | 8961621  | 8961637  | 4.25    | .                  | .       | intergenic | -0.202 | rs788098360   | 3 |
| AC.GT        | 13 | 9081598  | 9081608  | 5.5     | .                  | .       | intergenic | .      | .             | 7 |
| AAAT.ATTT    | 13 | 9210172  | 9210196  | 6.25    | .                  | .       | intergenic | 0.134  | rs793625084   | 2 |
| AT.AT        | 13 | 9443173  | 9443183  | 5.5     | .                  | .       | intergenic | .      | 344007 rs7878 | 2 |
| AG.CT        | 13 | 9475381  | 9475395  | 7.5     | .                  | .       | intergenic | 0.367  | rs788928957   | 2 |
| AC.GT        | 13 | 9724766  | 9724776  | 5.5     | ENSSSCT00000012274 | ZNF385D | intron     | 0.205  | .             | 4 |
| AAAAC.GTTTT  | 13 | 9857103  | 9857123  | 4.2     | .                  | .       | intergenic | -0.111 | .             | 2 |
| AT.AT        | 13 | 9874269  | 9874289  | 10.5    | .                  | .       | intergenic | .      | rs790582602   | 2 |
| AAC.GTT      | 13 | 9890559  | 9890577  | 6.33333 | .                  | .       | intergenic | -0.04  | 341657 rs7937 | 3 |
| AG.CT        | 13 | 10027194 | 10027204 | 5.5     | .                  | .       | intergenic | -0.186 | rs788795698   | 2 |
| AG.CT        | 13 | 10037041 | 10037057 | 8.5     | .                  | .       | intergenic | .      | rs787336068   | 2 |
| AC.GT        | 13 | 10098806 | 10098833 | 14      | .                  | .       | intergenic | 0.038  | .             | 2 |
| AT.AT        | 13 | 10292816 | 10292826 | 5.5     | .                  | .       | intergenic | .      | rs790301135   | 2 |
| AAC.GTT      | 13 | 10308360 | 10308379 | 6.66667 | .                  | .       | intergenic | .      | 370213 rs7932 | 2 |
| AAAAC.GTTTT  | 13 | 10337845 | 10337861 | 3.4     | .                  | .       | intergenic | 0.042  | rs789246528   | 2 |
| AC.GT        | 13 | 10452923 | 10452935 | 6.5     | .                  | .       | intergenic | -0.087 | rs792119252   | 4 |
| AAAC.GTTT    | 13 | 10582141 | 10582159 | 4.75    | .                  | .       | intergenic | 0.07   | 181239 rs7881 | 2 |
| AAC.GTT      | 13 | 10714072 | 10714088 | 5.66667 | .                  | .       | intergenic | 0.345  | rs792440453   | 2 |
| AC.GT        | 13 | 10811241 | 10811253 | 6.5     | .                  | .       | intergenic | 0.081  | rs789177049   | 2 |
| AAAC.GTTT    | 13 | 11049814 | 11049832 | 4.75    | .                  | .       | intergenic | -0.025 | .             | 2 |
| AATG.CATT    | 13 | 11164218 | 11164246 | 7.25    | .                  | .       | intergenic | .      | .             | 2 |
| AAAT.ATTT    | 13 | 11225614 | 11225631 | 4.5     | .                  | .       | intergenic | 0.135  | rs792929112   | 2 |
| AAT.ATT      | 13 | 11247484 | 11247495 | 4       | .                  | .       | intergenic | -0.063 | .             | 2 |

|              |    |          |          |         |                    |         |            |        |                 |   |
|--------------|----|----------|----------|---------|--------------------|---------|------------|--------|-----------------|---|
| AG.CT        | 13 | 11267607 | 11267618 | 6       | .                  | .       | intergenic | 0.336  | .               | 4 |
| AAAT.ATTT    | 13 | 11293284 | 11293302 | 4.75    | .                  | .       | intergenic | 0.414  | rs786645934     | 2 |
| AG.CT        | 13 | 11338888 | 11338900 | 6.5     | .                  | .       | intergenic | -0.003 | rs787007697     | 2 |
| AAAAG.CTTTT  | 13 | 11432752 | 11432768 | 3.4     | .                  | .       | intergenic | 0.259  | rs786903113     | 2 |
| AAAC.GTTT    | 13 | 11475723 | 11475737 | 3.75    | .                  | .       | intergenic | 0.099  | rs765599 rs7923 | 2 |
| AAAC.GTTT    | 13 | 11566215 | 11566239 | 6.25    | .                  | .       | intergenic | 0.356  | .               | 2 |
| AG.CT        | 13 | 11649728 | 11649738 | 5.5     | .                  | .       | intergenic | 0.161  | .               | 2 |
| ATC.GAT      | 13 | 11653998 | 11654017 | 6.66667 | .                  | .       | intergenic | -0.003 | rs791592517     | 2 |
| AC.GT        | 13 | 11707485 | 11707494 | 5       | ENSSSCT00000012275 | UBE2E2  | intron     | .      | .               | 2 |
| AC.GT        | 13 | 11707485 | 11707494 | 5       | ENSSSCT00000035075 | UBE2E2  | intron     | .      | .               | 2 |
| AG.CT        | 13 | 11863531 | 11863541 | 5.5     | .                  | .       | intergenic | .      | rs791006428     | 2 |
| AC.GT        | 13 | 12188318 | 12188334 | 8.5     | .                  | .       | intergenic | -0.079 | .               | 4 |
| AC.GT        | 13 | 12338607 | 12338619 | 6.5     | .                  | .       | intergenic | .      | rs792620503     | 3 |
| AAAGG.CCTTT  | 13 | 12436621 | 12436641 | 3.5     | ENSSSCT00000012277 | THRB    | intron     | 0.591  | rs320136 rs7873 | 2 |
| AC.GT        | 13 | 12493057 | 12493077 | 10.5    | ENSSSCT00000012277 | THRB    | intron     | 0.769  | rs148160 rs7921 | 2 |
| AC.GT        | 13 | 12540012 | 12540030 | 9.5     | .                  | .       | intergenic | 0.137  | rs793545909     | 2 |
| AT.AT        | 13 | 12659955 | 12659967 | 6.5     | .                  | .       | intergenic | 0.127  | rs168273 rs7888 | 2 |
| AC.GT        | 13 | 12800126 | 12800143 | 9       | .                  | .       | intergenic | -0.123 | rs113926 rs7863 | 4 |
| AT.AT        | 13 | 12954072 | 12954099 | 14      | .                  | .       | intergenic | 0.165  | .               | 4 |
| AAAC.GTTT    | 13 | 13000721 | 13000739 | 4.75    | .                  | .       | intergenic | .      | .               | 2 |
| AG.CT        | 13 | 13042411 | 13042426 | 8       | .                  | .       | intergenic | 0.075  | rs791126904     | 4 |
| AAT.ATT      | 13 | 13185781 | 13185792 | 4       | .                  | .       | intergenic | 0.068  | rs788261872     | 2 |
| AGATAT.ATATC | 13 | 13243319 | 13243350 | 5.33333 | .                  | .       | intergenic | .      | rs789131309     | 2 |
| AAAAT.ATTTT  | 13 | 13327848 | 13327872 | 5       | .                  | .       | intergenic | -0.089 | rs789529248     | 2 |
| AAAAT.ATTTT  | 13 | 13346123 | 13346138 | 3.2     | .                  | .       | intergenic | -0.267 | rs789228912     | 2 |
| AC.GT        | 13 | 13360656 | 13360672 | 8.5     | .                  | .       | intergenic | -0.037 | rs786937662     | 2 |
| AAT.ATT      | 13 | 13378917 | 13378934 | 6       | .                  | .       | intergenic | -0.067 | rs791836680     | 2 |
| AG.CT        | 13 | 13474705 | 13474730 | 13      | .                  | .       | intergenic | 0.009  | rs33439 rs7903  | 2 |
| AG.CT        | 13 | 13827964 | 13827979 | 8       | .                  | .       | intergenic | -0.047 | rs787657263     | 2 |
| AAAG.CTTT    | 13 | 13922930 | 13922949 | 5       | .                  | .       | intergenic | .      | rs792412171     | 2 |
| AT.AT        | 13 | 14172457 | 14172470 | 7       | ENSSSCT00000012279 | TOP2B   | intron     | 0.183  | rs315503 rs7893 | 2 |
| AAAAC.GTTTT  | 13 | 14279431 | 14279453 | 3.83333 | ENSSSCT00000012280 | NGLY1   | intron     | 0.266  | rs787035754     | 2 |
| AAT.ATT      | 13 | 14639389 | 14639401 | 4.33333 | .                  | .       | intergenic | -0.075 | rs791581923     | 2 |
| AG.CT        | 13 | 14762658 | 14762667 | 5       | .                  | .       | intergenic | -0.095 | .               | 2 |
| AAAC.GTTT    | 13 | 14819146 | 14819160 | 3.75    | .                  | .       | intergenic | .      | rs789595618     | 2 |
| AAAT.ATTT    | 13 | 14861327 | 14861347 | 5.25    | .                  | .       | intergenic | 0.186  | rs303616 rs7895 | 2 |
| AAC.GTT      | 13 | 14923909 | 14923936 | 9.33333 | .                  | .       | intergenic | .      | rs792869017     | 2 |
| AAAAAT.ATTTT | 13 | 15050479 | 15050502 | 4       | .                  | .       | intergenic | 0.188  | rs793199945     | 2 |
| AAC.GTT      | 13 | 15120208 | 15120223 | 5.33333 | .                  | .       | intergenic | -0.075 | .               | 3 |
| AAAC.GTTT    | 13 | 15166107 | 15166125 | 4.75    | .                  | .       | intergenic | 0.182  | rs789200198     | 2 |
| AT.AT        | 13 | 15166250 | 15166260 | 5.5     | .                  | .       | intergenic | 0.107  | rs787484679     | 5 |
| AAAT.ATTT    | 13 | 15264875 | 15264899 | 6.25    | .                  | .       | intergenic | 0.214  | rs788616890     | 2 |
| AATT.AATT    | 13 | 15439573 | 15439594 | 5.5     | ENSSSCT00000012284 | NEK10   | intron     | 0.528  | rs792253824     | 2 |
| AATT.AATT    | 13 | 15439573 | 15439594 | 5.5     | ENSSSCT00000012283 | NEK10   | intron     | 0.528  | rs792253824     | 2 |
| AAAC.GTTT    | 13 | 15470473 | 15470487 | 3.75    | ENSSSCT00000012284 | NEK10   | intron     | 0.117  | rs787813529     | 2 |
| AAAC.GTTT    | 13 | 15470473 | 15470487 | 3.75    | ENSSSCT00000012283 | NEK10   | intron     | 0.117  | rs787813529     | 2 |
| AAAG.CTTT    | 13 | 15499308 | 15499325 | 4.5     | ENSSSCT00000012285 | SLC4A7  | intron     | 2.153  | rs788542756     | 2 |
| AAAG.CTTT    | 13 | 16007952 | 16007968 | 4.25    | .                  | .       | intergenic | -0.151 | rs787614402     | 2 |
| AT.AT        | 13 | 16226120 | 16226135 | 8       | .                  | .       | intergenic | 0.008  | rs787375335     | 2 |
| AAAAC.GTTTT  | 13 | 16326862 | 16326878 | 3.4     | .                  | .       | intergenic | .      | rs309853 rs6900 | 2 |
| ACAG.CTGT    | 13 | 16550752 | 16550764 | 3.25    | .                  | .       | intergenic | -0.422 | rs793381989     | 2 |
| AAC.GTT      | 13 | 16613380 | 16613394 | 5       | .                  | .       | intergenic | .      | .               | 3 |
| AC.GT        | 13 | 17000409 | 17000421 | 6.5     | .                  | .       | intergenic | -0.021 | rs324500 rs7877 | 2 |
| AT.AT        | 13 | 17249037 | 17249046 | 5       | .                  | .       | intergenic | .      | rs788275271     | 2 |
| AC.GT        | 13 | 17405196 | 17405207 | 6       | .                  | .       | intergenic | -0.278 | .               | 3 |
| AC.GT        | 13 | 17428581 | 17428595 | 7.5     | .                  | .       | intergenic | -0.264 | .               | 2 |
| AC.GT        | 13 | 17444931 | 17444942 | 6       | .                  | .       | intergenic | 0.092  | .               | 2 |
| AC.GT        | 13 | 17563590 | 17563600 | 5.5     | .                  | .       | intergenic | -0.031 | rs790212611     | 2 |
| AAAC.GTTT    | 13 | 17701480 | 17701494 | 3.75    | .                  | .       | intergenic | 0.024  | rs790221028     | 2 |
| AC.GT        | 13 | 17770440 | 17770451 | 6       | .                  | .       | intergenic | 0.934  | .               | 3 |
| AAT.ATT      | 13 | 18466822 | 18466846 | 8.33333 | .                  | .       | intergenic | 0.047  | .               | 2 |
| AC.GT        | 13 | 18594917 | 18594936 | 10      | .                  | .       | intergenic | -0.202 | rs789050651     | 2 |
| AG.CT        | 13 | 18694510 | 18694541 | 16      | .                  | .       | intergenic | -0.173 | rs789137709     | 2 |
| AC.GT        | 13 | 18730094 | 18730112 | 9.5     | .                  | .       | intergenic | 0.134  | rs790393039     | 2 |
| AAC.GTT      | 13 | 18870291 | 18870308 | 6       | .                  | .       | intergenic | 0.115  | rs388608 rs7915 | 2 |
| AT.AT        | 13 | 19169060 | 19169070 | 5.5     | .                  | .       | intergenic | 0.194  | rs789410952     | 2 |
| AT.AT        | 13 | 19415332 | 19415341 | 5       | .                  | .       | intergenic | 0.107  | rs786790125     | 4 |
| AAAAT.ATTTT  | 13 | 19453310 | 19453328 | 3.8     | .                  | .       | intergenic | -0.024 | rs792708129     | 2 |
| AG.CT        | 13 | 19503297 | 19503309 | 6.5     | .                  | .       | intergenic | .      | rs789822881     | 4 |
| AGG.CCT      | 13 | 19637750 | 19637766 | 5.66667 | .                  | .       | intergenic | 0.206  | rs788980750     | 2 |
| AC.GT        | 13 | 19682684 | 19682696 | 6.5     | ENSSSCT00000012296 | STT3B   | intron     | 0.116  | rs735707 rs7938 | 2 |
| AAAAC.GTTTT  | 13 | 19830763 | 19830792 | 6       | ENSSSCT00000012297 | OSBPL10 | intron     | -0.063 | rs789579719     | 3 |
| AC.GT        | 13 | 19906288 | 19906299 | 6       | ENSSSCT00000012297 | OSBPL10 | intron     | .      | .               | 2 |
| AAAAC.GTTTT  | 13 | 19913016 | 19913036 | 3.5     | ENSSSCT00000012297 | OSBPL10 | intron     | .      | rs700450684     | 2 |
| AC.GT        | 13 | 20001883 | 20001893 | 5.5     | ENSSSCT00000012297 | OSBPL10 | intron     | -0.091 | rs792618394     | 2 |
| AAT.ATT      | 13 | 20086769 | 20086787 | 6.33333 | ENSSSCT00000012297 | OSBPL10 | intron     | 0.343  | rs792979632     | 2 |
| AAC.GTT      | 13 | 20091838 | 20091855 | 6       | ENSSSCT00000012297 | OSBPL10 | intron     | -0.004 | rs707838022     | 2 |
| AT.AT        | 13 | 20103954 | 20103964 | 5.5     | ENSSSCT00000012297 | OSBPL10 | intron     | -0.315 | rs792862113     | 2 |
| AAC.GTT      | 13 | 20124742 | 20124754 | 4.33333 | ENSSSCT00000012297 | OSBPL10 | intron     | -0.053 | .               | 2 |
| AT.AT        | 13 | 20257325 | 20257337 | 6.5     | .                  | .       | intergenic | .      | rs223348 rs7878 | 2 |
| AAAC.GTTT    | 13 | 20419022 | 20419038 | 4.25    | .                  | .       | intergenic | 0.095  | rs362779 rs7886 | 2 |
| AC.GT        | 13 | 20490591 | 20490601 | 5.5     | ENSSSCT00000026794 | CMTM8   | intron     | 0.02   | rs690275310     | 2 |
| AC.GT        | 13 | 20490591 | 20490601 | 5.5     | ENSSSCT00000030407 | CMTM8   | intron     | 0.02   | rs690275310     | 2 |
| AAAC.GTTT    | 13 | 20586775 | 20586789 | 3.75    | .                  | .       | intergenic | .      | rs790077680     | 2 |

|             |    |          |          |         |                    |          |            |        |                 |   |
|-------------|----|----------|----------|---------|--------------------|----------|------------|--------|-----------------|---|
| AT.AT       | 13 | 21034786 | 21034800 | 7.5     | ENSSSCT00000012303 | CLASP2   | intron     | .      | rs791571602     | 2 |
| AT.AT       | 13 | 21034786 | 21034800 | 7.5     | ENSSSCT00000025077 | CLASP2   | intron     | .      | rs791571602     | 2 |
| AAAAC.GTTTT | 13 | 21096735 | 21096763 | 4.83333 | ENSSSCT00000012303 | CLASP2   | promoter   | -0.318 | rs701351268     | 2 |
| AAAAC.GTTTT | 13 | 21096735 | 21096763 | 4.83333 | ENSSSCT00000025077 | CLASP2   | promoter   | -0.318 | rs701351268     | 2 |
| AC.GT       | 13 | 21403631 | 21403651 | 10.5    | .                  | .        | intergenic | 0.073  | rs789289119     | 2 |
| AT.AT       | 13 | 22057288 | 22057302 | 7.5     | .                  | .        | intergenic | 0.191  | .               | 2 |
| AC.GT       | 13 | 22129813 | 22129825 | 6.5     | .                  | .        | intergenic | 0.71   | .               | 4 |
| AT.AT       | 13 | 22158238 | 22158255 | 9       | .                  | .        | intergenic | -0.146 | .               | 3 |
| AC.GT       | 13 | 22642202 | 22642221 | 10      | .                  | .        | intergenic | .      | rs72120 rs7893  | 2 |
| AAAC.GTTT   | 13 | 22791856 | 22791873 | 4.5     | ENSSSCT00000012305 | ARPP21   | intron     | 0.004  | rs788596871     | 2 |
| AAAC.GTTT   | 13 | 22811373 | 22811386 | 3.5     | ENSSSCT00000012305 | ARPP21   | intron     | -0.267 | rs392823 rs7932 | 2 |
| AGAT.ATCT   | 13 | 23166871 | 23166907 | 9.25    | .                  | .        | intergenic | .      | rs263530 rs7866 | 2 |
| AC.GT       | 13 | 23288776 | 23288788 | 6.5     | .                  | .        | intergenic | .      | rs105065 rs7881 | 2 |
| AG.CT       | 13 | 23499149 | 23499173 | 12.5    | .                  | .        | intergenic | 0.004  | .               | 4 |
| AC.GT       | 13 | 23528267 | 23528277 | 5.5     | .                  | .        | intergenic | .      | .               | 2 |
| AAAC.GTTT   | 13 | 23533664 | 23533684 | 5.25    | .                  | .        | intergenic | 0.257  | rs789821148     | 2 |
| AAAAC.GTTTT | 13 | 23556659 | 23556695 | 7.4     | .                  | .        | intergenic | .      | rs790044559     | 2 |
| AT.AT       | 13 | 23636741 | 23636750 | 5       | ENSSSCT00000027443 | MLH1     | intron     | .      | .               | 4 |
| AG.CT       | 13 | 23798289 | 23798301 | 6.5     | .                  | .        | intergenic | 0.397  | .               | 3 |
| AAAC.GTTT   | 13 | 23825414 | 23825428 | 3.75    | .                  | .        | intergenic | .      | rs792261865     | 2 |
| AAAT.ATTT   | 13 | 24000568 | 24000586 | 4.75    | .                  | .        | intergenic | 0.226  | rs789058024     | 2 |
| AC.GT       | 13 | 24666870 | 24666892 | 11.5    | ENSSSCT00000030803 | .        | intron     | 0.207  | .               | 4 |
| AAAT.ATTT   | 13 | 24719539 | 24719557 | 4.75    | ENSSSCT00000030803 | .        | intron     | 2.45   | rs787443306     | 2 |
| AAAAT.ATTTT | 13 | 25473356 | 25473379 | 4.8     | ENSSSCT00000012326 | EXOG     | intron     | 0.188  | rs766845 rs7906 | 2 |
| AC.GT       | 13 | 25597883 | 25597900 | 9       | ENSSSCT00000012327 | SCN5A    | intron     | -0.039 | .               | 2 |
| AATG.CATT   | 13 | 25614771 | 25614800 | 7.5     | .                  | .        | intergenic | 0.095  | rs792519025     | 2 |
| AC.GT       | 13 | 25741247 | 25741256 | 5       | ENSSSCT00000012328 | SCN10A   | intron     | -0.042 | rs360217 rs7111 | 4 |
| AG.CT       | 13 | 25797457 | 25797479 | 11.5    | .                  | .        | intergenic | 0.078  | rs315796 rs7892 | 2 |
| AC.GT       | 13 | 25983994 | 25984004 | 5.5     | .                  | .        | intergenic | .      | rs788203292     | 2 |
| AAC.GTT     | 13 | 26044919 | 26044930 | 4       | ENSSSCT00000028766 | GORASP1  | 3'utr      | 1.079  | rs791676965     | 2 |
| AC.GT       | 13 | 26073005 | 26073017 | 6.5     | ENSSSCT00000022750 | TTC21A   | intron     | -0.127 | rs788352832     | 2 |
| AC.GT       | 13 | 26073005 | 26073017 | 6.5     | ENSSSCT00000012331 | TTC21A   | intron     | -0.127 | rs788352832     | 2 |
| AAAC.GTTT   | 13 | 26302383 | 26302398 | 4       | ENSSSCT00000029630 | SLC25A38 | intron     | -0.045 | rs791835222     | 2 |
| AC.GT       | 13 | 26449628 | 26449638 | 5.5     | ENSSSCT00000012335 | MOBP     | promoter   | 0.013  | rs793000087     | 2 |
| AAAT.ATTT   | 13 | 26583128 | 26583145 | 4.5     | .                  | .        | intergenic | 0.086  | rs787080389     | 2 |
| AC.GT       | 13 | 26657314 | 26657332 | 9.5     | ENSSSCT00000012336 | .        | intron     | -0.077 | rs789092451     | 2 |
| AT.AT       | 13 | 26689813 | 26689823 | 5.5     | ENSSSCT00000012336 | .        | intron     | 0.193  | rs789364549     | 3 |
| AAT.ATT     | 13 | 27030611 | 27030631 | 7       | .                  | .        | intergenic | .      | rs791501570     | 2 |
| AAAG.CTTT   | 13 | 27391519 | 27391536 | 4.5     | .                  | .        | intergenic | 0.512  | rs790338659     | 2 |
| AT.AT       | 13 | 27547545 | 27547558 | 7       | .                  | .        | intergenic | -0.12  | rs227807 rs7869 | 2 |
| AT.AT       | 13 | 27553434 | 27553444 | 5.5     | .                  | .        | intergenic | -0.094 | .               | 3 |
| AAAAC.GTTTT | 13 | 27589977 | 27590000 | 4       | .                  | .        | intergenic | 0.045  | rs371176 rs7866 | 2 |
| ATCC.GGAT   | 13 | 27599815 | 27599841 | 6.75    | .                  | .        | intergenic | .      | rs259229 rs7915 | 2 |
| AT.AT       | 13 | 27634646 | 27634657 | 6       | ENSSSCT00000012342 | CTNNB1   | intron     | -0.017 | rs787241206     | 2 |
| AAGG.CCTT   | 13 | 27687245 | 27687280 | 9       | .                  | .        | intergenic | .      | rs795207 rs7864 | 2 |
| AT.AT       | 13 | 27783683 | 27783693 | 5.5     | .                  | .        | intergenic | .      | .               | 3 |
| AAAAC.GTTTT | 13 | 27845862 | 27845879 | 3.6     | .                  | .        | intergenic | .      | rs710615137     | 2 |
| AAAAT.ATTTT | 13 | 27907846 | 27907863 | 3.6     | .                  | .        | intergenic | .      | .               | 2 |
| AC.GT       | 13 | 27916849 | 27916858 | 5       | .                  | .        | intergenic | 0.065  | .               | 3 |
| AAAG.CTTT   | 13 | 28166147 | 28166165 | 4.75    | .                  | .        | intergenic | 0.03   | rs790362967     | 2 |
| AT.AT       | 13 | 28175575 | 28175590 | 8       | .                  | .        | intergenic | -0.019 | rs789808395     | 3 |
| AAAC.GTTT   | 13 | 28203800 | 28203819 | 5       | ENSSSCT00000029576 | .        | intron     | .      | rs181202 rs7906 | 3 |
| AAAC.GTTT   | 13 | 28487920 | 28487940 | 5.25    | .                  | .        | intergenic | .      | rs322589 rs7903 | 2 |
| ATCC.GGAT   | 13 | 28493356 | 28493392 | 9.25    | .                  | .        | intergenic | 0.477  | rs792471742     | 2 |
| AC.GT       | 13 | 28500128 | 28500140 | 6.5     | .                  | .        | intergenic | -0.203 | rs333455 rs7908 | 2 |
| AAC.GTT     | 13 | 28564660 | 28564680 | 7       | ENSSSCT00000012347 | TRAK1    | intron     | -0.093 | rs793476475     | 4 |
| AC.GT       | 13 | 28603760 | 28603770 | 5.5     | ENSSSCT00000012347 | TRAK1    | 3'utr      | 0.473  | rs786550572     | 2 |
| AAAAG.CTTTT | 13 | 28865856 | 28865881 | 5.2     | .                  | .        | intergenic | .      | rs791011066     | 2 |
| AAC.GTT     | 13 | 28949406 | 28949434 | 9.66667 | ENSSSCT00000012360 | HIGD1A   | intron     | 0.171  | rs787505788     | 2 |
| AC.GT       | 13 | 29109597 | 29109607 | 5.5     | .                  | .        | intergenic | 0.193  | rs790846018     | 2 |
| AG.CT       | 13 | 29708209 | 29708224 | 8       | ENSSSCT00000012366 | ANO10    | intron     | 0.182  | rs314575 rs7894 | 2 |
| AAAT.ATTT   | 13 | 29753039 | 29753053 | 3.75    | ENSSSCT00000012366 | ANO10    | intron     | 0.228  | rs192068 rs7862 | 2 |
| AAAC.GTTT   | 13 | 29930167 | 29930184 | 4.5     | .                  | .        | intergenic | -0.062 | rs792970677     | 2 |
| AT.AT       | 13 | 29955403 | 29955419 | 8.5     | .                  | .        | intergenic | -0.004 | rs786291030     | 2 |
| AG.CT       | 13 | 30055044 | 30055053 | 5       | .                  | .        | intergenic | -0.068 | rs791213493     | 2 |
| AT.AT       | 13 | 30085698 | 30085707 | 5       | .                  | .        | intergenic | 0.183  | .               | 4 |
| AAAC.GTTT   | 13 | 30224034 | 30224059 | 6.5     | .                  | .        | intergenic | -0.044 | rs232060 rs7870 | 2 |
| AAC.GTT     | 13 | 30629480 | 30629493 | 4.66667 | .                  | .        | intergenic | .      | rs254839 rs7911 | 2 |
| AC.GT       | 13 | 30723803 | 30723814 | 6       | ENSSSCT00000012375 | ZNF197   | promoter   | 0.189  | rs790066577     | 3 |
| AAC.GTT     | 13 | 30811178 | 30811191 | 4.66667 | ENSSSCT00000012379 | KIAA1143 | promoter   | 0.162  | rs790562658     | 3 |
| AT.AT       | 13 | 30866688 | 30866714 | 13.5    | ENSSSCT00000012380 | KIF15    | intron     | 0.022  | rs787287836     | 2 |
| AAAAC.GTTTT | 13 | 30955083 | 30955121 | 7.8     | .                  | .        | intergenic | .      | rs790020294     | 3 |
| ACC.GGT     | 13 | 31302836 | 31302849 | 4.66667 | ENSSSCT00000024122 | .        | intron     | -0.124 | rs338420 rs7904 | 3 |
| AAAG.CTTT   | 13 | 31329055 | 31329073 | 4.75    | .                  | .        | intergenic | 0.132  | rs790795922     | 2 |
| AAAG.CTTT   | 13 | 31435242 | 31435260 | 4.75    | .                  | .        | intergenic | -0.236 | rs791510199     | 2 |
| AT.AT       | 13 | 31562695 | 31562706 | 6       | ENSSSCT00000012384 | .        | intron     | 0.021  | rs788364185     | 2 |
| ATCAT.ATGAT | 13 | 31581192 | 31581214 | 3.83333 | ENSSSCT00000012384 | .        | intron     | 0.057  | rs789956898     | 3 |
| AG.CT       | 13 | 32197752 | 32197765 | 7       | ENSSSCT00000035018 | FYCO1    | intron     | -0.486 | rs244643 rs7886 | 2 |
| AG.CT       | 13 | 32298166 | 32298193 | 14      | .                  | .        | intergenic | -0.068 | rs792986480     | 2 |
| AC.GT       | 13 | 32542826 | 32542837 | 6       | .                  | .        | intergenic | -0.23  | rs792264969     | 2 |
| AG.CT       | 13 | 32717675 | 32717701 | 13.5    | .                  | .        | intergenic | -0.153 | rs793629680     | 4 |
| AAAAC.GTTTT | 13 | 33094126 | 33094149 | 4.8     | ENSSSCT00000025127 | .        | intron     | -0.052 | rs788524594     | 2 |
| AAAAC.GTTTT | 13 | 33094126 | 33094149 | 4.8     | ENSSSCT00000012405 | .        | intron     | -0.052 | rs788524594     | 2 |
| AAAC.GTTT   | 13 | 33310562 | 33310580 | 4.75    | .                  | .        | intergenic | 0.127  | rs790291429     | 2 |



|             |    |          |          |         |                    |          |            |        |               |   |
|-------------|----|----------|----------|---------|--------------------|----------|------------|--------|---------------|---|
| AC.GT       | 13 | 33312926 | 33312937 | 6       | .                  | .        | intergenic | 0.142  | rs793592069   | 2 |
| AAAC.GTTT   | 13 | 33437611 | 33437631 | 5.25    | .                  | .        | intergenic | .      | rs791748963   | 2 |
| AAC.GTT     | 13 | 33533443 | 33533456 | 4.66667 | .                  | .        | intergenic | .      | 145069 rs7932 | 2 |
| AATG.CATT   | 13 | 33555282 | 33555316 | 8.75    | .                  | .        | intergenic | .      | 303525 rs7913 | 2 |
| AAAT.ATTT   | 13 | 33729264 | 33729287 | 6       | ENSSSCT00000023426 | .        | intron     | .      | 105113 rs7888 | 2 |
| AAAT.ATTT   | 13 | 33729264 | 33729287 | 6       | ENSSSCT00000012417 | .        | intron     | .      | 105113 rs7888 | 2 |
| AC.GT       | 13 | 33798903 | 33798913 | 5.5     | ENSSSCT00000012417 | .        | intron     | 2.621  | rs696260336   | 4 |
| AATC.GATT   | 13 | 34006501 | 34006523 | 5.75    | .                  | .        | intergenic | -0.046 | 10919 rs7876  | 2 |
| AC.GT       | 13 | 34028286 | 34028296 | 5.5     | .                  | .        | intergenic | 0.248  | rs793491676   | 2 |
| AC.GT       | 13 | 34495018 | 34495030 | 6.5     | ENSSSCT00000012430 | PFKFB4   | intron     | 0.877  | rs792183956   | 3 |
| AAAC.GTTT   | 13 | 35531933 | 35531964 | 8       | .                  | .        | intergenic | .      | rs790231630   | 2 |
| AG.CT       | 13 | 35814319 | 35814341 | 11.5    | .                  | .        | intergenic | -0.247 | .             | 4 |
| AG.CT       | 13 | 35968380 | 35968396 | 8.5     | ENSSSCT00000029394 | IFRD2    | intron     | -0.026 | .             | 3 |
| AC.GT       | 13 | 36217366 | 36217381 | 8       | .                  | .        | intergenic | 0.436  | rs790515932   | 4 |
| AAAAC.GTTTT | 13 | 36477339 | 36477362 | 4.8     | .                  | .        | intergenic | 0.173  | rs789667610   | 2 |
| AAAC.GTTT   | 13 | 36486841 | 36486856 | 4       | .                  | .        | intergenic | .      | rs786308065   | 2 |
| AAAG.CTTT   | 13 | 36872806 | 36872820 | 3.75    | .                  | .        | intergenic | 0.214  | rs792150056   | 2 |
| AAAAC.GTTTT | 13 | 36890017 | 36890041 | 5       | .                  | .        | intergenic | 1.252  | 555610 rs7886 | 2 |
| AC.GT       | 13 | 37686813 | 37686828 | 8       | ENSSSCT00000025398 | DNAH1    | intron     | -0.243 | rs787490335   | 2 |
| AAAAT.ATTTT | 13 | 38046664 | 38046687 | 4.8     | ENSSSCT00000012526 | NEK4     | intron     | 0.288  | 10602 rs7909  | 2 |
| AG.CT       | 13 | 38167587 | 38167606 | 10      | .                  | .        | intergenic | .      | rs712945353   | 2 |
| AC.GT       | 13 | 38648424 | 38648433 | 5       | .                  | .        | intergenic | -0.691 | .             | 2 |
| AC.GT       | 13 | 38685415 | 38685429 | 7.5     | .                  | .        | intergenic | -0.031 | rs789075309   | 4 |
| AG.CT       | 13 | 38744672 | 38744689 | 9       | .                  | .        | intergenic | -0.086 | rs793601963   | 2 |
| AGCCC.GGGCT | 13 | 38942621 | 38942643 | 4.6     | ENSSSCT00000012536 | .        | intron     | -0.076 | 127140 rs7884 | 2 |
| GGCCC.GGGCC | 13 | 38943801 | 38943823 | 3.83333 | ENSSSCT00000012536 | .        | intron     | -0.244 | rs787102476   | 2 |
| AAAT.ATTT   | 13 | 39233286 | 39233301 | 4       | .                  | .        | intergenic | .      | rs787355941   | 2 |
| AC.GT       | 13 | 39382690 | 39382716 | 13.5    | .                  | .        | intergenic | 0.087  | .             | 2 |
| AAAAC.GTTTT | 13 | 39914601 | 39914621 | 4.2     | ENSSSCT00000023696 | .        | intron     | -0.057 | rs791793745   | 2 |
| AAAT.ATTT   | 13 | 40205123 | 40205141 | 4.75    | ENSSSCT00000024071 | .        | intron     | -0.065 | rs786360471   | 2 |
| AC.GT       | 13 | 40625837 | 40625858 | 11      | .                  | .        | intergenic | 0.564  | .             | 2 |
| AAGG.CCTT   | 13 | 40929189 | 40929208 | 5       | .                  | .        | intergenic | 0.086  | rs786739210   | 2 |
| AT.AT       | 13 | 41522244 | 41522263 | 10      | ENSSSCT00000030632 | .        | intron     | 0.189  | .             | 2 |
| AG.CT       | 13 | 41533755 | 41533767 | 6.5     | ENSSSCT00000030632 | .        | intron     | 0.25   | .             | 3 |
| AAC.GTT     | 13 | 41769319 | 41769338 | 6.66667 | ENSSSCT00000028128 | .        | intron     | 0.059  | rs791743426   | 2 |
| ACC.GGT     | 13 | 41972450 | 41972462 | 4.33333 | .                  | .        | intergenic | 0.101  | rs786313758   | 2 |
| AAAC.GTTT   | 13 | 42178222 | 42178241 | 5       | .                  | .        | intergenic | .      | rs790442654   | 2 |
| AAAC.GTTT   | 13 | 42242870 | 42242890 | 5.25    | .                  | .        | intergenic | 0.469  | rs788475631   | 2 |
| AT.AT       | 13 | 42243463 | 42243474 | 6       | .                  | .        | intergenic | -0.351 | rs786719828   | 2 |
| AAAC.GTTT   | 13 | 42348829 | 42348852 | 6       | ENSSSCT00000028725 | FAM208A  | intron     | 0.002  | rs790243017   | 2 |
| AG.CT       | 13 | 42412112 | 42412121 | 5       | .                  | .        | intergenic | .      | rs787030650   | 2 |
| AAAG.CTTT   | 13 | 42772852 | 42772870 | 4.75    | .                  | .        | intergenic | -0.163 | rs790003471   | 2 |
| AAAG.CTTT   | 13 | 42856153 | 42856164 | 3       | .                  | .        | intergenic | 0.074  | rs788981400   | 2 |
| AAC.GTT     | 13 | 43007976 | 43007992 | 5.66667 | .                  | .        | intergenic | .      | 101050 rs7889 | 4 |
| AAAT.ATTT   | 13 | 43331626 | 43331653 | 7       | ENSSSCT00000012546 | PDE12    | 3'utr      | 0.461  | rs788681578   | 2 |
| AT.AT       | 13 | 43447055 | 43447067 | 6.5     | .                  | .        | intergenic | 0.123  | 353666 rs7863 | 2 |
| AG.CT       | 13 | 44059671 | 44059681 | 5.5     | ENSSSCT00000012556 | PXK      | intron     | .      | .             | 3 |
| AAAAC.GTTTT | 13 | 44141302 | 44141329 | 4.66667 | .                  | .        | intergenic | -0.101 | rs791912056   | 2 |
| AAACC.GGTTT | 13 | 44755043 | 44755063 | 4.2     | ENSSSCT00000012564 | C3orf67  | intron     | .      | rs790525899   | 2 |
| AAACC.GGTTT | 13 | 44755043 | 44755063 | 4.2     | ENSSSCT00000012565 | C3orf67  | intron     | .      | rs790525899   | 2 |
| AT.AT       | 13 | 44943325 | 44943335 | 5.5     | .                  | .        | intergenic | .      | rs786255695   | 2 |
| ACAT.ATGT   | 13 | 45150495 | 45150510 | 4       | .                  | .        | intergenic | 0.381  | rs787310034   | 3 |
| AC.GT       | 13 | 45325393 | 45325404 | 6       | .                  | .        | intergenic | .      | 383237 rs7867 | 3 |
| AAC.GTT     | 13 | 45406956 | 45406972 | 5.66667 | .                  | .        | intergenic | 1.155  | rs790696620   | 2 |
| AT.AT       | 13 | 45567727 | 45567739 | 6.5     | .                  | .        | intergenic | .      | rs788609955   | 3 |
| AC.GT       | 13 | 45882309 | 45882326 | 9       | .                  | .        | intergenic | 0.024  | rs791011441   | 2 |
| AAAC.GTTT   | 13 | 45988116 | 45988145 | 7.5     | .                  | .        | intergenic | 0.392  | 368409 rs7875 | 2 |
| AAAC.GTTT   | 13 | 46017568 | 46017582 | 3.75    | .                  | .        | intergenic | -0.393 | rs789395611   | 2 |
| AC.GT       | 13 | 46130984 | 46131014 | 15.5    | .                  | .        | intergenic | 0.464  | rs788772261   | 2 |
| AT.AT       | 13 | 46328112 | 46328137 | 13      | .                  | .        | intergenic | 0.052  | rs786746624   | 2 |
| AC.GT       | 13 | 46402002 | 46402018 | 8.5     | .                  | .        | intergenic | .      | .             | 3 |
| AG.CT       | 13 | 46457090 | 46457100 | 5.5     | .                  | .        | intergenic | 1.064  | .             | 2 |
| AAAC.GTTT   | 13 | 47291955 | 47291973 | 4.75    | .                  | .        | intergenic | .      | rs789083373   | 2 |
| AAAT.ATTT   | 13 | 47312699 | 47312718 | 5       | .                  | .        | intergenic | 0.977  | 173343 rs7892 | 2 |
| AT.AT       | 13 | 47318549 | 47318559 | 5.5     | .                  | .        | intergenic | -0.064 | rs787985369   | 2 |
| AG.CT       | 13 | 47656411 | 47656420 | 5       | .                  | .        | intergenic | -0.126 | .             | 4 |
| AC.GT       | 13 | 47714460 | 47714470 | 5.5     | .                  | .        | intergenic | -0.026 | 166835 rs7910 | 3 |
| AAT.ATT     | 13 | 47732354 | 47732365 | 4       | ENSSSCT00000012568 | PTPRG    | intron     | -0.233 | rs787181173   | 3 |
| AAGG.CCTT   | 13 | 48212530 | 48212542 | 3.25    | ENSSSCT00000012572 | CADPS    | intron     | 0.073  | .             | 2 |
| AG.CT       | 13 | 48755712 | 48755723 | 6       | .                  | .        | intergenic | -0.094 | .             | 3 |
| AG.CT       | 13 | 48853984 | 48853998 | 7.5     | .                  | .        | intergenic | 0.049  | rs789117854   | 2 |
| AC.GT       | 13 | 48878673 | 48878682 | 5       | .                  | .        | intergenic | 0.121  | .             | 4 |
| AAT.ATT     | 13 | 49325975 | 49326004 | 10      | .                  | .        | intergenic | 0.008  | 229219 rs7916 | 2 |
| AC.GT       | 13 | 49532102 | 49532114 | 6.5     | ENSSSCT00000023657 | SYNPR    | intron     | 0.061  | rs786878749   | 2 |
| AC.GT       | 13 | 49549173 | 49549183 | 5.5     | ENSSSCT00000023657 | SYNPR    | intron     | 0.301  | rs786613344   | 2 |
| AG.CT       | 13 | 49571998 | 49572007 | 5       | ENSSSCT00000023657 | SYNPR    | intron     | 0.074  | rs692533966   | 3 |
| AG.CT       | 13 | 49679548 | 49679572 | 12.5    | ENSSSCT00000012575 | SNTN     | intron     | -0.199 | rs791347164   | 2 |
| ATC.GAT     | 13 | 49738268 | 49738282 | 5       | .                  | .        | intergenic | -0.023 | rs792101039   | 2 |
| AAAAC.GTTTT | 13 | 49764492 | 49764513 | 4.4     | .                  | .        | intergenic | -0.017 | 138311 rs7921 | 2 |
| AGG.CCT     | 13 | 50084104 | 50084127 | 8       | .                  | .        | intergenic | 0.029  | rs787886527   | 2 |
| AC.GT       | 13 | 50101760 | 50101772 | 6.5     | ENSSSCT00000012578 | PRICKLE2 | intron     | -0.001 | rs787582462   | 2 |
| AC.GT       | 13 | 50162419 | 50162442 | 12      | ENSSSCT00000012578 | PRICKLE2 | intron     | -0.159 | .             | 3 |
| AC.GT       | 13 | 50162419 | 50162442 | 12      | ENSSSCT00000020410 | 7SK      | promoter   | -0.159 | .             | 3 |
| AAAC.GTTT   | 13 | 50274277 | 50274291 | 3.75    | .                  | .        | intergenic | .      | 14076 rs7923  | 3 |



|             |    |          |          |         |                    |        |            |        |                 |   |
|-------------|----|----------|----------|---------|--------------------|--------|------------|--------|-----------------|---|
| AAAC.GTTT   | 13 | 50317993 | 50318020 | 7       | .                  | .      | intergenic | 0.355  | .               | 2 |
| AAAC.GTTT   | 13 | 50375451 | 50375477 | 6.75    | .                  | .      | intergenic | -0.13  | rs787025699     | 2 |
| AC.GT       | 13 | 50375879 | 50375899 | 10.5    | .                  | .      | intergenic | .      | .               | 4 |
| AAT.ATT     | 13 | 50940234 | 50940253 | 6.66667 | .                  | .      | intergenic | -0.494 | rs787336480     | 2 |
| AAAC.GTTT   | 13 | 51006787 | 51006805 | 4.75    | .                  | .      | intergenic | 0.524  | rs70768 rs7897  | 3 |
| AT.AT       | 13 | 51132467 | 51132476 | 5       | .                  | .      | intergenic | 0.085  | rs791389124     | 2 |
| AAAC.GTTT   | 13 | 51390483 | 51390499 | 4.25    | .                  | .      | intergenic | 0.163  | rs791270571     | 2 |
| AAAAC.GTTTT | 13 | 51755788 | 51755816 | 4.83333 | ENSSSCT00000012581 | MAGI1  | intron     | 0.707  | rs704150598     | 2 |
| AAAT.ATTT   | 13 | 51855328 | 51855353 | 6.5     | .                  | .      | intergenic | -0.145 | rs359390 rs7883 | 2 |
| AAG.CTT     | 13 | 51924829 | 51924841 | 4.33333 | .                  | .      | intergenic | .      | rs330978 rs7938 | 2 |
| AATG.CATT   | 13 | 52020468 | 52020490 | 5.75    | .                  | .      | intergenic | -0.052 | rs792183963     | 2 |
| AAAAG.CTTTT | 13 | 52048922 | 52048939 | 3.6     | .                  | .      | intergenic | 0.092  | .               | 2 |
| ACAT.ATGT   | 13 | 52112916 | 52112934 | 4.75    | .                  | .      | intergenic | -0.101 | .               | 2 |
| AAAG.CTTT   | 13 | 52285023 | 52285048 | 6.5     | .                  | .      | intergenic | -0.141 | rs787159703     | 2 |
| AAAT.ATTT   | 13 | 52444143 | 52444166 | 6       | .                  | .      | intergenic | .      | rs789811949     | 2 |
| AG.CT       | 13 | 52882811 | 52882825 | 7.5     | .                  | .      | intergenic | -0.399 | rs793455553     | 2 |
| AAAG.CTTT   | 13 | 53138151 | 53138168 | 4.5     | .                  | .      | intergenic | -0.349 | rs78822 rs7892  | 2 |
| AAAG.CTTT   | 13 | 53268364 | 53268382 | 4.75    | .                  | .      | intergenic | .      | .               | 2 |
| AT.AT       | 13 | 53915841 | 53915850 | 5       | ENSSSCT00000012586 | SUCLG2 | intron     | 0.001  | rs790885087     | 2 |
| AAC.GTT     | 13 | 54122260 | 54122273 | 4.66667 | .                  | .      | intergenic | .      | rs792541616     | 4 |
| AG.CT       | 13 | 54146399 | 54146408 | 5       | .                  | .      | intergenic | -0.228 | .               | 3 |
| AAAAT.ATTTT | 13 | 54672903 | 54672918 | 3.2     | .                  | .      | intergenic | .      | rs792250497     | 2 |
| ACAT.ATGT   | 13 | 55172700 | 55172722 | 5.75    | .                  | .      | intergenic | .      | rs384859 rs7932 | 2 |
| AACAC.GTGT  | 13 | 55873707 | 55873730 | 4.8     | ENSSSCT00000012598 | FRMD4B | intron     | -0.045 | rs352894 rs7898 | 2 |
| AAAT.ATTT   | 13 | 55993370 | 55993392 | 5.75    | .                  | .      | intergenic | 0.098  | rs747772 rs7936 | 2 |
| AC.GT       | 13 | 56055724 | 56055736 | 6.5     | .                  | .      | intergenic | -0.021 | rs792922318     | 2 |
| AAAAC.GTTTT | 13 | 56068553 | 56068581 | 5.8     | .                  | .      | intergenic | 0.189  | rs788508069     | 2 |
| AAAAC.GTTTT | 13 | 56397756 | 56397776 | 4.2     | .                  | .      | intergenic | 0.085  | rs356492 rs7897 | 2 |
| AC.GT       | 13 | 56439631 | 56439648 | 9       | .                  | .      | intergenic | 0.044  | rs129265 rs7868 | 2 |
| AAAC.GTTT   | 13 | 56728682 | 56728711 | 7.5     | .                  | .      | intergenic | 0.154  | rs754937 rs7890 | 2 |
| ATC.GAT     | 13 | 56813348 | 56813365 | 6       | .                  | .      | intergenic | 0.08   | rs786327247     | 4 |
| AC.GT       | 13 | 57191947 | 57191966 | 10      | .                  | .      | intergenic | 0.157  | rs701370608     | 2 |
| AC.GT       | 13 | 57380990 | 57381011 | 11      | .                  | .      | intergenic | -0.195 | rs364485 rs7884 | 2 |
| AC.GT       | 13 | 57773298 | 57773307 | 5       | .                  | .      | intergenic | -0.091 | .               | 2 |
| AAACC.GTTTT | 13 | 57893084 | 57893116 | 6.6     | ENSSSCT00000022793 | .      | intron     | -0.192 | rs374033 rs7870 | 2 |
| AAC.GTT     | 13 | 58553913 | 58553926 | 4.66667 | .                  | .      | intergenic | -0.131 | rs791148983     | 2 |
| AAG.CTT     | 13 | 58672860 | 58672876 | 5.66667 | .                  | .      | intergenic | -0.058 | .               | 2 |
| AAT.ATT     | 13 | 58829741 | 58829765 | 8.33333 | .                  | .      | intergenic | .      | rs793496951     | 2 |
| AAC.GTT     | 13 | 58934280 | 58934312 | 11      | .                  | .      | intergenic | 0.149  | rs193924 rs7026 | 6 |
| AAAC.GTTT   | 13 | 58981208 | 58981232 | 6.25    | .                  | .      | intergenic | 0.007  | rs789561223     | 2 |
| AAG.CTT     | 13 | 59209195 | 59209209 | 5       | .                  | .      | intergenic | -0.056 | rs170744 rs7865 | 3 |
| AATG.CATT   | 13 | 59431092 | 59431124 | 8.25    | .                  | .      | intergenic | -0.21  | rs792205396     | 2 |
| AC.GT       | 13 | 59578169 | 59578189 | 10.5    | .                  | .      | intergenic | .      | rs362378 rs7869 | 2 |
| AG.CT       | 13 | 59681886 | 59681897 | 6       | .                  | .      | intergenic | -0.098 | rs790919278     | 2 |
| AG.CT       | 13 | 59772469 | 59772481 | 6.5     | ENSSSCT00000012605 | SHQ1   | intron     | 0.234  | rs793190558     | 2 |
| AAAC.GTTT   | 13 | 59847718 | 59847748 | 7.75    | ENSSSCT00000012605 | SHQ1   | intron     | 0.126  | rs790783651     | 2 |
| AT.AT       | 13 | 59945999 | 59946024 | 13      | ENSSSCT00000024001 | GXYLT2 | intron     | .      | rs196400 rs7916 | 2 |
| AT.AT       | 13 | 59945999 | 59946024 | 13      | ENSSSCT00000012607 | GXYLT2 | intron     | .      | rs196400 rs7916 | 2 |
| AT.AT       | 13 | 60006780 | 60006790 | 5.5     | ENSSSCT00000024001 | GXYLT2 | intron     | -0.119 | rs111582 rs7863 | 2 |
| AT.AT       | 13 | 60006780 | 60006790 | 5.5     | ENSSSCT00000012607 | GXYLT2 | intron     | -0.119 | rs111582 rs7863 | 2 |
| AT.AT       | 13 | 60109083 | 60109101 | 9.5     | .                  | .      | intergenic | 0.145  | rs786925911     | 3 |
| AC.GT       | 13 | 60298782 | 60298792 | 5.5     | .                  | .      | intergenic | -0.037 | rs704071348     | 4 |
| AC.GT       | 13 | 60410003 | 60410026 | 12      | .                  | .      | intergenic | -0.061 | rs790172442     | 2 |
| AC.GT       | 13 | 60528516 | 60528528 | 6.5     | .                  | .      | intergenic | -0.062 | rs786278605     | 2 |
| ACC.GGT     | 13 | 60534823 | 60534840 | 6       | .                  | .      | intergenic | -0.284 | rs788710245     | 2 |
| AAAC.GTTT   | 13 | 60538022 | 60538042 | 5.25    | .                  | .      | intergenic | -0.382 | rs367711 rs7903 | 2 |
| AAAC.GTTT   | 13 | 60612891 | 60612910 | 5       | .                  | .      | intergenic | -0.09  | rs788630418     | 2 |
| AAAAC.GTTTT | 13 | 60645765 | 60645783 | 3.8     | .                  | .      | intergenic | -0.165 | rs788634207     | 2 |
| AG.CT       | 13 | 61106715 | 61106732 | 9       | .                  | .      | intergenic | .      | rs327868 rs7871 | 2 |
| AAAC.GTTT   | 13 | 61219753 | 61219767 | 3.75    | .                  | .      | intergenic | 0.007  | rs176763 rs7905 | 2 |
| AAAC.GTTT   | 13 | 61471390 | 61471406 | 4.25    | .                  | .      | intergenic | .      | rs793855624     | 2 |
| ACAT.ATGT   | 13 | 61605868 | 61605882 | 3.75    | ENSSSCT00000012610 | CNTN3  | intron     | -0.125 | .               | 4 |
| AT.AT       | 13 | 61885989 | 61886004 | 8       | .                  | .      | intergenic | 0.028  | rs789468932     | 2 |
| AAAAT.ATTTT | 13 | 61911220 | 61911243 | 4.8     | .                  | .      | intergenic | 0.027  | rs792404628     | 2 |
| AC.GT       | 13 | 61965120 | 61965130 | 5.5     | .                  | .      | intergenic | -0.126 | rs786889732     | 2 |
| AAAT.ATTT   | 13 | 62525769 | 62525783 | 3.75    | .                  | .      | intergenic | .      | rs788026106     | 2 |
| ACAT.ATGT   | 13 | 63001840 | 63001862 | 5.75    | .                  | .      | intergenic | 0.11   | rs790475416     | 2 |
| AAAAG.CTTTT | 13 | 63062302 | 63062319 | 3       | .                  | .      | intergenic | -0.06  | rs786961117     | 2 |
| AAATT.AATTT | 13 | 63243666 | 63243688 | 4.6     | .                  | .      | intergenic | -0.23  | rs790880635     | 2 |
| AAAC.GTTT   | 13 | 63252226 | 63252240 | 3.75    | .                  | .      | intergenic | -0.105 | rs789625145     | 2 |
| AT.AT       | 13 | 63267140 | 63267151 | 6       | .                  | .      | intergenic | -0.171 | rs792413675     | 2 |
| AC.GT       | 13 | 63483337 | 63483349 | 6.5     | .                  | .      | intergenic | -0.014 | .               | 2 |
| AC.GT       | 13 | 63509129 | 63509140 | 6       | .                  | .      | intergenic | -0.119 | rs220841 rs7932 | 2 |
| AG.CT       | 13 | 63526322 | 63526336 | 7.5     | .                  | .      | intergenic | .      | rs179272 rs7883 | 4 |
| AAC.GTT     | 13 | 64274214 | 64274225 | 4       | .                  | .      | intergenic | -0.071 | rs789668333     | 3 |
| AAAT.ATTT   | 13 | 64834916 | 64834939 | 6       | .                  | .      | intergenic | 0.098  | rs790192565     | 2 |
| AAAAC.GTTTT | 13 | 64845159 | 64845181 | 4.6     | .                  | .      | intergenic | -0.164 | rs158096 rs7883 | 2 |
| AAAG.CTTT   | 13 | 65050157 | 65050171 | 3.75    | .                  | .      | intergenic | 0.577  | rs792726466     | 4 |
| AT.AT       | 13 | 65141367 | 65141379 | 6.5     | .                  | .      | intergenic | -0.192 | rs366379 rs7932 | 2 |
| AAAAG.CTTTT | 13 | 65644426 | 65644448 | 4.6     | .                  | .      | intergenic | 0.416  | rs385191 rs7897 | 2 |
| AT.AT       | 13 | 65740502 | 65740513 | 6       | .                  | .      | intergenic | 0.272  | rs787566944     | 2 |
| AAAG.CTTT   | 13 | 65767130 | 65767148 | 4.75    | .                  | .      | intergenic | 0.587  | rs788857402     | 2 |
| AAAC.GTTT   | 13 | 65787763 | 65787781 | 4.75    | .                  | .      | intergenic | -0.078 | rs383522 rs7885 | 2 |
| AG.CT       | 13 | 65819747 | 65819757 | 5.5     | .                  | .      | intergenic | 0.161  | rs791993592     | 2 |

|             |    |          |          |         |                    |         |            |        |               |   |
|-------------|----|----------|----------|---------|--------------------|---------|------------|--------|---------------|---|
| AAAC.GTTT   | 13 | 65896023 | 65896037 | 3.75    | .                  | .       | intergenic | 0.358  | rs789252641   | 2 |
| AC.GT       | 13 | 65944338 | 65944362 | 12.5    | .                  | .       | intergenic | -0.039 | rs789834090   | 2 |
| AAAT.ATTT   | 13 | 65995850 | 65995874 | 6.25    | .                  | .       | intergenic | .      | rs793481838   | 2 |
| AAAAC.GTTTT | 13 | 66169775 | 66169792 | 3.6     | ENSSSCT00000012620 | CRBN    | intron     | 1.182  | rs786861271   | 2 |
| AAAAT.ATTTT | 13 | 66503751 | 66503771 | 4.2     | .                  | .       | intergenic | -0.041 | rs792030496   | 2 |
| AAAC.GTTT   | 13 | 66717698 | 66717724 | 6.75    | .                  | .       | intergenic | 0.075  | rs792500441   | 2 |
| AAC.GTT     | 13 | 66868541 | 66868552 | 4       | .                  | .       | intergenic | .      | rs788100655   | 2 |
| AAT.ATT     | 13 | 66896419 | 66896436 | 6       | .                  | .       | intergenic | 0.244  | rs790450337   | 3 |
| AGAGG.CCTCT | 13 | 67337864 | 67337886 | 3.83333 | ENSSSCT00000012622 | SUMF1   | intron     | 0.352  | rs787683635   | 2 |
| AAAC.GTTT   | 13 | 67352732 | 67352754 | 5.75    | .                  | .       | intergenic | .      | rs792634699   | 2 |
| AAAAT.ATTTT | 13 | 67845643 | 67845668 | 5.2     | .                  | .       | intergenic | 0.106  | 331062 rs7936 | 2 |
| AAAT.ATTT   | 13 | 67982374 | 67982396 | 5.75    | .                  | .       | intergenic | .      | rs788438406   | 2 |
| AC.GT       | 13 | 68170289 | 68170308 | 10      | .                  | .       | intergenic | 0.061  | rs792083379   | 2 |
| AC.GT       | 13 | 68183825 | 68183842 | 9       | .                  | .       | intergenic | -0.086 | 175907 rs7881 | 2 |
| AAAC.GTTT   | 13 | 68211672 | 68211690 | 4.75    | .                  | .       | intergenic | -0.151 | rs788196845   | 2 |
| AAAT.ATTT   | 13 | 68246111 | 68246126 | 4       | .                  | .       | intergenic | -0.097 | rs789843072   | 2 |
| AAC.GTT     | 13 | 68251274 | 68251293 | 6.66667 | .                  | .       | intergenic | 0.002  | rs793547420   | 2 |
| AAAT.ATTT   | 13 | 68526303 | 68526321 | 4.75    | .                  | .       | intergenic | -0.055 | rs789562208   | 2 |
| AT.AT       | 13 | 68824348 | 68824358 | 5.5     | .                  | .       | intergenic | -0.147 | .             | 5 |
| AG.CT       | 13 | 69031669 | 69031681 | 6.5     | .                  | .       | intergenic | .      | rs790513826   | 2 |
| AT.AT       | 13 | 69236359 | 69236372 | 7       | .                  | .       | intergenic | -0.226 | .             | 2 |
| AC.GT       | 13 | 69291988 | 69292012 | 12.5    | .                  | .       | intergenic | -0.16  | rs793185893   | 2 |
| AAAC.GTTT   | 13 | 69462333 | 69462351 | 4.75    | .                  | .       | intergenic | 0.046  | .             | 2 |
| AGAT.ATCT   | 13 | 69626060 | 69626089 | 7.5     | .                  | .       | intergenic | .      | .             | 2 |
| AG.CT       | 13 | 69629850 | 69629861 | 6       | .                  | .       | intergenic | -0.049 | .             | 4 |
| AAG.CTT     | 13 | 69665943 | 69665956 | 4.66667 | .                  | .       | intergenic | 0.154  | 359982 rs7862 | 2 |
| AAAAC.GTTTT | 13 | 70356290 | 70356308 | 3.8     | .                  | .       | intergenic | -0.197 | 391661 rs7911 | 2 |
| AG.CT       | 13 | 70533132 | 70533142 | 5.5     | .                  | .       | intergenic | 0.468  | 362936 rs7929 | 4 |
| AAAC.GTTT   | 13 | 70595017 | 70595032 | 4       | ENSSSCT00000031304 | GRM7    | intron     | 0.035  | rs787703290   | 2 |
| AAT.ATT     | 13 | 70697249 | 70697273 | 8.33333 | ENSSSCT00000031304 | GRM7    | intron     | 0.04   | .             | 2 |
| AAAT.ATTT   | 13 | 70754559 | 70754577 | 4.75    | ENSSSCT00000031304 | GRM7    | intron     | 0.561  | rs791854810   | 2 |
| AAAG.CTTT   | 13 | 70930557 | 70930591 | 8.75    | ENSSSCT00000031304 | GRM7    | intron     | -0.117 | .             | 2 |
| ACAT.ATGT   | 13 | 71255699 | 71255713 | 3.75    | .                  | .       | intergenic | -0.08  | rs786736555   | 2 |
| AAAAC.GTTTT | 13 | 71356395 | 71356418 | 4.8     | .                  | .       | intergenic | -0.289 | rs786541371   | 2 |
| AAT.ATT     | 13 | 71402307 | 71402326 | 6.66667 | .                  | .       | intergenic | -0.119 | rs792036414   | 2 |
| AAAC.GTTT   | 13 | 71815706 | 71815724 | 4.75    | .                  | .       | intergenic | -0.066 | rs792777511   | 2 |
| AGAT.ATCT   | 13 | 72192588 | 72192602 | 3.75    | .                  | .       | intergenic | 0.175  | rs793810941   | 2 |
| AAGAG.CTCTT | 13 | 72789793 | 72789811 | 3.16667 | .                  | .       | intergenic | .      | .             | 3 |
| AAAAT.ATTTT | 13 | 72905961 | 72905975 | 3       | ENSSSCT00000012630 | SETD5   | intron     | 0.084  | 338028 rs7870 | 2 |
| AG.CT       | 13 | 73210770 | 73210789 | 10      | ENSSSCT00000012645 | RPUSD3  | promoter   | .      | rs791498941   | 2 |
| AC.GT       | 13 | 73588113 | 73588128 | 8       | ENSSSCT00000013960 | ATP2B2  | intron     | -0.228 | 337325 rs7906 | 4 |
| AGG.CCT     | 13 | 73863692 | 73863704 | 4.33333 | .                  | .       | intergenic | .      | .             | 2 |
| AT.AT       | 13 | 74409593 | 74409607 | 7.5     | .                  | .       | intergenic | .      | rs786963284   | 2 |
| AT.AT       | 13 | 74415513 | 74415524 | 6       | ENSSSCT00000027036 | .       | promoter   | .      | rs786808150   | 2 |
| GAGGG.CCCTC | 13 | 74707410 | 74707435 | 4.33333 | ENSSSCT00000012667 | ATG7    | intron     | 0.069  | rs790299824   | 2 |
| AAAC.GTTT   | 13 | 74762683 | 74762699 | 4.25    | ENSSSCT00000012667 | ATG7    | intron     | 0.254  | rs791868246   | 2 |
| AAAAC.GTTTT | 13 | 74876573 | 74876588 | 3.2     | ENSSSCT00000012667 | ATG7    | intron     | 0.529  | 302889 rs7902 | 2 |
| AAAT.ATTT   | 13 | 74968446 | 74968459 | 3.5     | .                  | .       | intergenic | 0.005  | 309457 rs7901 | 2 |
| CCCCC.GGGGC | 13 | 74989473 | 74989489 | 2.83333 | .                  | .       | intergenic | -0.021 | 381955 rs7933 | 2 |
| AT.AT       | 13 | 75440072 | 75440081 | 5       | .                  | .       | intergenic | 0.091  | rs788357200   | 2 |
| AT.AT       | 13 | 75568087 | 75568096 | 5       | .                  | .       | intergenic | 0.284  | rs792496486   | 3 |
| AAAC.GTTT   | 13 | 76042237 | 76042259 | 5.75    | ENSSSCT00000012675 | .       | intron     | -0.059 | 361243 rs7885 | 2 |
| AAAC.GTTT   | 13 | 76042237 | 76042259 | 5.75    | ENSSSCT00000031032 | .       | intron     | -0.059 | 361243 rs7885 | 2 |
| AAAT.ATTT   | 13 | 76835228 | 76835250 | 5.75    | ENSSSCT00000012690 | NR2C2   | intron     | .      | rs793836431   | 2 |
| AC.GT       | 13 | 77154110 | 77154121 | 6       | .                  | .       | intergenic | .      | rs713599403   | 2 |
| AAAC.GTTT   | 13 | 77497413 | 77497449 | 9.25    | ENSSSCT00000012696 | .       | intron     | .      | 335243 rs7873 | 2 |
| AAC.GTT     | 13 | 78671702 | 78671715 | 4.66667 | ENSSSCT00000012707 | NUP210  | intron     | .      | .             | 5 |
| AC.GT       | 13 | 78686757 | 78686768 | 6       | ENSSSCT00000012707 | NUP210  | intron     | -0.256 | .             | 2 |
| AATG.CATT   | 13 | 78999136 | 78999162 | 6.75    | .                  | .       | intergenic | -0.323 | rs786658083   | 2 |
| AAC.GTT     | 13 | 79399924 | 79399940 | 5.66667 | ENSSSCT00000012708 | HMCES   | intron     | .      | rs793691100   | 2 |
| AAAC.GTTT   | 13 | 79756435 | 79756459 | 6.25    | .                  | .       | intergenic | 0.108  | 358739 rs7899 | 2 |
| AAAC.GTTT   | 13 | 79811698 | 79811715 | 4.5     | ENSSSCT00000012719 | KBTBD12 | intron     | 0.739  | 314511 rs7865 | 2 |
| AC.GT       | 13 | 79873323 | 79873340 | 9       | .                  | .       | intergenic | .      | rs792789795   | 2 |
| AAC.GTT     | 13 | 79892784 | 79892796 | 4.33333 | ENSSSCT00000012717 | .       | intron     | .      | 314628 rs7924 | 3 |
| AAAT.ATTT   | 13 | 79907799 | 79907818 | 5       | ENSSSCT00000012717 | .       | intron     | .      | 327698 rs7893 | 2 |
| AAAT.ATTT   | 13 | 80948079 | 80948098 | 5       | .                  | .       | intergenic | .      | rs791585417   | 2 |
| AAC.GTT     | 13 | 81054073 | 81054098 | 8.66667 | .                  | .       | intergenic | .      | 185624 rs7875 | 2 |
| AAAC.GTTT   | 13 | 81125911 | 81125922 | 3       | .                  | .       | intergenic | 0.18   | rs786466500   | 2 |
| AG.CT       | 13 | 81184245 | 81184255 | 5.5     | ENSSSCT00000012725 | DNAJC13 | intron     | 0.275  | rs792803571   | 4 |
| AAAAC.GTTTT | 13 | 81435127 | 81435148 | 4.4     | ENSSSCT00000012730 | .       | intron     | 2.485  | .             | 2 |
| AC.GT       | 13 | 81644410 | 81644422 | 6.5     | .                  | .       | intergenic | 0.092  | rs792351155   | 2 |
| AAAC.GTTT   | 13 | 81705442 | 81705461 | 5       | .                  | .       | intergenic | 0.14   | 281174 rs7912 | 2 |
| AT.AT       | 13 | 81751732 | 81751743 | 6       | .                  | .       | intergenic | .      | .             | 3 |
| AAC.GTT     | 13 | 81952558 | 81952573 | 5.33333 | .                  | .       | intergenic | .      | 214072 rs7863 | 2 |
| AAAC.GTTT   | 13 | 82041611 | 82041625 | 3.75    | ENSSSCT00000012735 | BFSP2   | intron     | .      | 327679 rs7908 | 2 |
| AAAC.GTTT   | 13 | 82335551 | 82335569 | 4.75    | ENSSSCT00000023415 | .       | intron     | .      | rs789738351   | 2 |
| AAAC.GTTT   | 13 | 82420795 | 82420811 | 4.25    | .                  | .       | intergenic | .      | 350223 rs7879 | 2 |
| AC.GT       | 13 | 82517483 | 82517494 | 6       | ENSSSCT00000012738 | RAB6B   | intron     | -0.442 | .             | 4 |
| AAAC.GTTT   | 13 | 82881653 | 82881668 | 4       | ENSSSCT00000012743 | RYK     | intron     | 0.153  | 304892 rs7920 | 2 |
| AAAG.CTTT   | 13 | 82961383 | 82961405 | 5.75    | .                  | .       | intergenic | -0.018 | rs787472562   | 2 |
| AAT.ATT     | 13 | 82970523 | 82970536 | 4.66667 | .                  | .       | intergenic | 0.203  | rs792650354   | 2 |
| AAAC.GTTT   | 13 | 83063280 | 83063298 | 4.75    | .                  | .       | intergenic | -0.146 | rs786367340   | 2 |
| AAAAC.GTTTT | 13 | 83085858 | 83085881 | 4.8     | .                  | .       | intergenic | .      | rs788694178   | 2 |
| AAAT.ATTT   | 13 | 83250505 | 83250531 | 6.75    | .                  | .       | intergenic | -0.004 | 374274 rs7921 | 2 |

|             |    |          |          |         |                    |          |            |        |               |   |
|-------------|----|----------|----------|---------|--------------------|----------|------------|--------|---------------|---|
| AC.GT       | 13 | 83409746 | 83409758 | 6.5     | .                  | .        | intergenic | -0.048 | .             | 3 |
| AAAAC.GTTTT | 13 | 83446694 | 83446712 | 3.8     | .                  | .        | intergenic | .      | rs792554614   | 2 |
| AAAC.GTTT   | 13 | 83587504 | 83587522 | 4.75    | ENSSSCT00000012749 | .        | promoter   | 0.387  | rs792061168   | 2 |
| AAAC.GTTT   | 13 | 83677560 | 83677586 | 6.75    | .                  | .        | intergenic | 0.039  | rs792786960   | 2 |
| AAG.CTT     | 13 | 84183182 | 84183219 | 12.6667 | .                  | .        | intergenic | 0.639  | .             | 2 |
| AAAAC.GTTTT | 13 | 84277344 | 84277362 | 3.8     | .                  | .        | intergenic | 0.214  | rs791785441   | 2 |
| AAAAC.GTTTT | 13 | 84582171 | 84582199 | 5.8     | .                  | .        | intergenic | .      | 327029 rs7909 | 2 |
| AAAC.GTTT   | 13 | 84621035 | 84621046 | 3       | ENSSSCT00000012757 | PCCB     | intron     | .      | rs788636489   | 3 |
| AAATC.GATTT | 13 | 84993461 | 84993479 | 3.8     | ENSSSCT00000012754 | .        | intron     | 0.106  | rs791218747   | 2 |
| AG.CT       | 13 | 85046287 | 85046298 | 6       | ENSSSCT00000012754 | .        | intron     | .      | .             | 2 |
| AAAAC.GTTTT | 13 | 85059932 | 85059950 | 3.16667 | ENSSSCT00000012754 | .        | intron     | .      | 256474 rs7920 | 2 |
| AT.AT       | 13 | 85079479 | 85079489 | 5.5     | ENSSSCT00000012754 | .        | intron     | 0.083  | .             | 2 |
| AAAC.GTTT   | 13 | 85225842 | 85225860 | 4.75    | .                  | .        | intergenic | 0.221  | 373146 rs7912 | 2 |
| AAAAC.GTTTT | 13 | 85238798 | 85238816 | 3.8     | .                  | .        | intergenic | 0.221  | rs789399556   | 2 |
| AT.AT       | 13 | 85242521 | 85242535 | 7.5     | .                  | .        | intergenic | 0.242  | .             | 2 |
| AAAT.ATTT   | 13 | 85551837 | 85551859 | 5.75    | .                  | .        | intergenic | .      | rs792965579   | 2 |
| AC.GT       | 13 | 85733328 | 85733348 | 10.5    | .                  | .        | intergenic | -0.106 | rs789941590   | 2 |
| AAAC.GTTT   | 13 | 85753086 | 85753119 | 8.5     | .                  | .        | intergenic | -0.016 | 784509 rs7872 | 2 |
| AAAC.GTTT   | 13 | 85849666 | 85849680 | 3.75    | .                  | .        | intergenic | 0.194  | rs789473158   | 2 |
| AAAC.GTTT   | 13 | 85955109 | 85955129 | 5.25    | .                  | .        | intergenic | .      | rs787416508   | 2 |
| AATT.AATT   | 13 | 86162027 | 86162044 | 4.5     | .                  | .        | intergenic | .      | rs792607108   | 2 |
| AAAC.GTTT   | 13 | 86164736 | 86164750 | 3.75    | .                  | .        | intergenic | 0.938  | rs791295750   | 2 |
| AAAC.GTTT   | 13 | 86317101 | 86317126 | 6.5     | .                  | .        | intergenic | .      | rs789645413   | 2 |
| AAT.ATT     | 13 | 86675562 | 86675582 | 7       | ENSSSCT00000012762 | .        | intron     | 0.223  | rs788142371   | 2 |
| AAAAC.GTTTT | 13 | 86748699 | 86748715 | 3.4     | .                  | .        | intergenic | 0.078  | 334780 rs7935 | 2 |
| ACC.GGT     | 13 | 86952825 | 86952840 | 5.33333 | ENSSSCT00000023265 | CEP70    | intron     | 1.148  | 263142 rs7893 | 2 |
| AT.AT       | 13 | 86974857 | 86974869 | 6.5     | ENSSSCT00000023265 | CEP70    | intron     | 0.02   | rs791972279   | 7 |
| AAAT.ATTT   | 13 | 87707094 | 87707113 | 5       | .                  | .        | intergenic | 0.156  | 369714 rs7913 | 2 |
| AC.GT       | 13 | 87750073 | 87750091 | 9.5     | .                  | .        | intergenic | 0.429  | .             | 3 |
| AC.GT       | 13 | 88016142 | 88016158 | 8.5     | .                  | .        | intergenic | 0.227  | rs698980167   | 2 |
| AAGG.CCTT   | 13 | 88424832 | 88424858 | 6.75    | .                  | .        | intergenic | 0.005  | 240880 rs7931 | 2 |
| AC.GT       | 13 | 88484285 | 88484309 | 12.5    | .                  | .        | intergenic | 0.101  | 350340 rs7917 | 2 |
| AAAC.GTTT   | 13 | 88495417 | 88495430 | 3.5     | .                  | .        | intergenic | 0.022  | rs791396297   | 2 |
| AG.CT       | 13 | 88531723 | 88531738 | 8       | .                  | .        | intergenic | -0.057 | rs787116124   | 2 |
| AAAC.GTTT   | 13 | 88569210 | 88569228 | 4.75    | .                  | .        | intergenic | 0.05   | 128928 rs7864 | 3 |
| AC.GT       | 13 | 88660362 | 88660373 | 6       | .                  | .        | intergenic | 0.232  | .             | 4 |
| AATG.CATT   | 13 | 88788458 | 88788486 | 7.25    | .                  | .        | intergenic | -0.015 | rs786885058   | 2 |
| AAAC.GTTT   | 13 | 89024381 | 89024399 | 4.75    | .                  | .        | intergenic | 0.444  | rs790328009   | 2 |
| AAAAC.GTTTT | 13 | 89077381 | 89077396 | 3.2     | .                  | .        | intergenic | 0.098  | rs790746502   | 2 |
| AAT.ATT     | 13 | 89166103 | 89166118 | 5.33333 | ENSSSCT00000012771 | CLSTN2   | intron     | .      | .             | 2 |
| AAAC.GTTT   | 13 | 89342727 | 89342741 | 3.75    | .                  | .        | intergenic | .      | rs790070956   | 2 |
| AAAC.GTTT   | 13 | 89402502 | 89402516 | 3.75    | ENSSSCT00000012773 | TRIM42   | intron     | 0.089  | rs787502755   | 2 |
| AAAAG.CTTTT | 13 | 89553956 | 89553991 | 7.2     | .                  | .        | intergenic | .      | rs788806531   | 2 |
| AGC.GCT     | 13 | 89565530 | 89565545 | 5.33333 | .                  | .        | intergenic | -0.102 | rs793396417   | 2 |
| AG.CT       | 13 | 89616104 | 89616114 | 5.5     | ENSSSCT00000030064 | SLC25A36 | intron     | -0.001 | .             | 2 |
| AG.CT       | 13 | 89616104 | 89616114 | 5.5     | ENSSSCT00000012774 | SLC25A36 | intron     | -0.001 | .             | 2 |
| AG.CT       | 13 | 89616104 | 89616114 | 5.5     | ENSSSCT00000021586 | snoU13   | promoter   | -0.001 | .             | 2 |
| AAAAC.GTTTT | 13 | 89685931 | 89685956 | 5.2     | .                  | .        | intergenic | .      | rs787717808   | 2 |
| ATCC.GGAT   | 13 | 89800614 | 89800642 | 7.25    | .                  | .        | intergenic | 0.141  | 227191 rs7936 | 3 |
| AAAC.GTTT   | 13 | 89932661 | 89932684 | 6       | .                  | .        | intergenic | 0.144  | 216734 rs7883 | 2 |
| AAC.GTT     | 13 | 89968783 | 89968804 | 7.33333 | .                  | .        | intergenic | 0.681  | 235713 rs7868 | 2 |
| AG.CT       | 13 | 90035741 | 90035758 | 9       | .                  | .        | intergenic | 0.481  | .             | 2 |
| AG.CT       | 13 | 90308822 | 90308834 | 6.5     | .                  | .        | intergenic | -0.018 | rs793498384   | 3 |
| AAAC.GTTT   | 13 | 90361168 | 90361191 | 6       | .                  | .        | intergenic | .      | rs789950470   | 2 |
| AAC.GTT     | 13 | 90371830 | 90371870 | 13.6667 | .                  | .        | intergenic | 0.239  | rs793888058   | 4 |
| AC.GT       | 13 | 90499600 | 90499611 | 6       | ENSSSCT00000012782 | .        | intron     | .      | rs789769223   | 2 |
| ACAT.ATGT   | 13 | 90660474 | 90660489 | 4       | .                  | .        | intergenic | .      | .             | 4 |
| AT.AT       | 13 | 90686315 | 90686324 | 5       | .                  | .        | intergenic | 0.933  | rs791899573   | 3 |
| AAAT.ATTT   | 13 | 90733627 | 90733641 | 3.75    | .                  | .        | intergenic | -0.001 | rs789090883   | 2 |
| AAAC.GTTT   | 13 | 90910803 | 90910822 | 5       | ENSSSCT00000012784 | XRN1     | intron     | 1.559  | rs792428307   | 2 |
| AT.AT       | 13 | 91024055 | 91024072 | 9       | ENSSSCT00000012786 | ATR      | intron     | 0.235  | rs789334603   | 2 |
| AAAC.GTTT   | 13 | 91168383 | 91168397 | 3.75    | ENSSSCT00000012787 | PLS1     | intron     | 0.313  | .             | 3 |
| AAC.GTT     | 13 | 91263290 | 91263304 | 5       | ENSSSCT00000012789 | TRPC1    | intron     | .      | rs788175362   | 2 |
| ATC.GAT     | 13 | 91361588 | 91361602 | 5       | ENSSSCT00000012791 | PCOLCE2  | intron     | .      | rs790276611   | 2 |
| AT.AT       | 13 | 91408276 | 91408286 | 5.5     | .                  | .        | intergenic | 0.122  | rs790799013   | 2 |
| AAAC.GTTT   | 13 | 91476357 | 91476375 | 4.75    | .                  | .        | intergenic | 0.141  | rs695024171   | 2 |
| AC.GT       | 13 | 91645543 | 91645584 | 21      | .                  | .        | intergenic | -0.02  | rs792419344   | 2 |
| AC.GT       | 13 | 91651231 | 91651250 | 10      | .                  | .        | intergenic | -0.052 | .             | 2 |
| AAAT.ATTT   | 13 | 91779415 | 91779433 | 4.75    | ENSSSCT00000024870 | .        | intron     | 0.071  | .             | 2 |
| ATC.GAT     | 13 | 91950711 | 91950731 | 7       | ENSSSCT00000024870 | .        | intron     | 0.323  | rs789042023   | 2 |
| ACAGT.ACTGT | 13 | 92077128 | 92077159 | 5.33333 | ENSSSCT00000012794 | .        | intron     | 0.237  | rs787637315   | 2 |
| AC.GT       | 13 | 92202203 | 92202217 | 7.5     | ENSSSCT00000012794 | .        | intron     | 0.116  | rs787506942   | 2 |
| AAAC.GTTT   | 13 | 92232917 | 92232931 | 3.75    | ENSSSCT00000012794 | .        | intron     | 0.073  | rs788529157   | 2 |
| AAT.ATT     | 13 | 92439574 | 92439590 | 5.66667 | .                  | .        | intergenic | .      | rs703710880   | 3 |
| AAAC.GTTT   | 13 | 92669253 | 92669271 | 4.75    | .                  | .        | intergenic | 0.201  | rs790584829   | 2 |
| AC.GT       | 13 | 92831955 | 92831965 | 5.5     | .                  | .        | intergenic | -0.085 | .             | 2 |
| AG.CT       | 13 | 93063159 | 93063169 | 5.5     | .                  | .        | intergenic | -0.58  | .             | 3 |
| AC.GT       | 13 | 93287819 | 93287845 | 13.5    | .                  | .        | intergenic | -0.006 | rs791429930   | 3 |
| AAG.CTT     | 13 | 93392922 | 93392934 | 4.33333 | .                  | .        | intergenic | -0.153 | rs788978063   | 2 |
| AAAC.GTTT   | 13 | 93427507 | 93427525 | 4.75    | .                  | .        | intergenic | -0.098 | rs789601794   | 2 |
| AAC.GTT     | 13 | 93491659 | 93491683 | 8.33333 | .                  | .        | intergenic | 0.001  | rs787392972   | 2 |
| AT.AT       | 13 | 93516600 | 93516609 | 5       | .                  | .        | intergenic | .      | rs786920882   | 2 |
| AC.GT       | 13 | 93668819 | 93668829 | 5.5     | .                  | .        | intergenic | .      | rs790468821   | 2 |
| AC.GT       | 13 | 93686785 | 93686821 | 18.5    | .                  | .        | intergenic | 0.032  | .             | 3 |

|             |    |           |           |         |                    |         |            |        |               |   |
|-------------|----|-----------|-----------|---------|--------------------|---------|------------|--------|---------------|---|
| AAG.CTT     | 13 | 94223493  | 94223507  | 5       | ENSSSCT00000012797 | PLOD2   | intron     | -0.004 | rs793366082   | 2 |
| AT.AT       | 13 | 94500039  | 94500053  | 7.5     | .                  | .       | intergenic | 0.011  | .             | 4 |
| AC.GT       | 13 | 94501685  | 94501704  | 10      | .                  | .       | intergenic | -0.062 | .             | 5 |
| AT.AT       | 13 | 94622522  | 94622540  | 9.5     | .                  | .       | intergenic | -0.097 | rs792811636   | 2 |
| AC.GT       | 13 | 94678460  | 94678476  | 8.5     | .                  | .       | intergenic | 0.07   | .             | 3 |
| ATC.GAT     | 13 | 94692366  | 94692382  | 5.66667 | .                  | .       | intergenic | .      | rs787642696   | 2 |
| ATC.GAT     | 13 | 95321166  | 95321186  | 7       | .                  | .       | intergenic | -0.03  | 711841 rs7892 | 2 |
| AC.GT       | 13 | 95589370  | 95589382  | 6.5     | .                  | .       | intergenic | 0.707  | rs792650624   | 3 |
| AAAC.GTTT   | 13 | 95657831  | 95657855  | 6.25    | .                  | .       | intergenic | 0.056  | 118219 rs7912 | 2 |
| AAAC.GTTT   | 13 | 95708304  | 95708324  | 5.25    | .                  | .       | intergenic | -0.091 | rs792283550   | 2 |
| AAAT.ATTT   | 13 | 96043730  | 96043749  | 5       | .                  | .       | intergenic | -0.262 | rs793070054   | 2 |
| AAAC.GTTT   | 13 | 96304155  | 96304189  | 8.75    | .                  | .       | intergenic | .      | 258533 rs7880 | 2 |
| AAAC.GTTT   | 13 | 96409003  | 96409017  | 3.75    | .                  | .       | intergenic | -0.02  | rs787486474   | 2 |
| AC.GT       | 13 | 96662275  | 96662298  | 12      | .                  | .       | intergenic | 0.381  | 393334 rs7936 | 2 |
| AAAAC.GTTTT | 13 | 96861412  | 96861448  | 7.4     | .                  | .       | intergenic | 0.264  | 795703 rs7886 | 2 |
| AT.AT       | 13 | 96960641  | 96960656  | 8       | ENSSSCT00000035119 | AGTR1   | intron     | 0.276  | rs791226358   | 2 |
| AT.AT       | 13 | 96960641  | 96960656  | 8       | ENSSSCT00000034453 | AGTR1   | intron     | 0.276  | rs791226358   | 2 |
| AC.GT       | 13 | 98114656  | 98114672  | 8.5     | ENSSSCT00000022374 | RNF13   | intron     | 0.179  | .             | 2 |
| AAAAG.CTTTT | 13 | 98171159  | 98171187  | 5.8     | ENSSSCT00000022374 | RNF13   | intron     | .      | rs789672418   | 2 |
| AAT.ATT     | 13 | 98247217  | 98247232  | 5.33333 | .                  | .       | intergenic | 0.095  | rs791052462   | 2 |
| AGG.CCT     | 13 | 98278197  | 98278211  | 5       | .                  | .       | intergenic | 0.027  | .             | 2 |
| AC.GT       | 13 | 98597788  | 98597804  | 8.5     | .                  | .       | intergenic | 0.11   | rs792157493   | 3 |
| AT.AT       | 13 | 98689160  | 98689170  | 5.5     | .                  | .       | intergenic | 0.334  | rs789232657   | 4 |
| AAAAC.GTTTT | 13 | 98731433  | 98731460  | 5.6     | ENSSSCT00000030003 | TSC22D2 | intron     | 0.253  | rs788721684   | 2 |
| AAAAC.GTTTT | 13 | 98731433  | 98731460  | 5.6     | ENSSSCT00000012818 | TSC22D2 | intron     | 0.253  | rs788721684   | 2 |
| AAC.GTT     | 13 | 98943235  | 98943252  | 6       | .                  | .       | intergenic | .      | rs789782396   | 2 |
| AAGC.GCTT   | 13 | 99139451  | 99139474  | 6       | .                  | .       | intergenic | 0.147  | 783909 rs7932 | 3 |
| AATG.CATT   | 13 | 99317028  | 99317044  | 4.25    | .                  | .       | intergenic | 0.27   | rs786637988   | 2 |
| AAC.GTT     | 13 | 99663649  | 99663668  | 6.66667 | .                  | .       | intergenic | -0.125 | rs792463131   | 2 |
| ACAT.ATGT   | 13 | 99711413  | 99711444  | 8       | .                  | .       | intergenic | -0.218 | 772259 rs7882 | 2 |
| AC.GT       | 13 | 99720108  | 99720123  | 8       | .                  | .       | intergenic | -0.026 | 313252 rs7867 | 2 |
| AAAAG.CTTTT | 13 | 99864451  | 99864469  | 3.8     | ENSSSCT00000012827 | IGSF10  | intron     | .      | rs790409434   | 2 |
| AC.GT       | 13 | 99931117  | 99931128  | 6       | .                  | .       | intergenic | .      | .             | 4 |
| AAAT.ATTT   | 13 | 99944830  | 99944843  | 3.5     | .                  | .       | intergenic | 0.059  | rs790129980   | 2 |
| AAAT.ATTT   | 13 | 99989335  | 99989350  | 4       | .                  | .       | intergenic | .      | rs793820697   | 3 |
| AAT.ATT     | 13 | 100020177 | 100020190 | 4.66667 | .                  | .       | intergenic | 0.089  | rs791736690   | 2 |
| AT.AT       | 13 | 100171414 | 100171424 | 5.5     | .                  | .       | intergenic | .      | rs792904633   | 2 |
| AC.GT       | 13 | 100197935 | 100197947 | 6.5     | .                  | .       | intergenic | -0.013 | .             | 2 |
| AC.GT       | 13 | 100211900 | 100211913 | 7       | .                  | .       | intergenic | .      | rs786942442   | 2 |
| AAAAC.GTTTT | 13 | 100246331 | 100246359 | 5.8     | .                  | .       | intergenic | .      | 786858 rs7867 | 2 |
| AAG.CTT     | 13 | 100501796 | 100501812 | 5.66667 | .                  | .       | intergenic | 0.108  | rs788028937   | 2 |
| AAAAC.GTTTT | 13 | 100644662 | 100644688 | 5.4     | ENSSSCT00000012830 | MBNL1   | intron     | -0.027 | 369012 rs7925 | 2 |
| AC.GT       | 13 | 100761073 | 100761092 | 10      | .                  | .       | intergenic | 0.061  | rs792853589   | 2 |
| AAC.GTT     | 13 | 100968179 | 100968210 | 10.6667 | .                  | .       | intergenic | -0.275 | rs791539892   | 2 |
| AAAT.ATTT   | 13 | 101069996 | 101070016 | 5.25    | .                  | .       | intergenic | 0.005  | rs792614520   | 2 |
| AG.CT       | 13 | 101092237 | 101092246 | 5       | .                  | .       | intergenic | 0.096  | .             | 3 |
| AAAC.GTTT   | 13 | 101213987 | 101214009 | 5.75    | .                  | .       | intergenic | .      | 355571 rs7876 | 2 |
| AAAC.GTTT   | 13 | 101282129 | 101282143 | 3.75    | .                  | .       | intergenic | .      | .             | 2 |
| AC.GT       | 13 | 101336308 | 101336327 | 10      | ENSSSCT00000012832 | RAP2B   | intron     | .      | rs791796784   | 2 |
| AT.AT       | 13 | 101688092 | 101688103 | 6       | .                  | .       | intergenic | 0.025  | rs788142846   | 2 |
| AAAAC.GTTTT | 13 | 101723363 | 101723390 | 5.6     | .                  | .       | intergenic | -0.038 | rs790340187   | 2 |
| AAG.CTT     | 13 | 101930451 | 101930465 | 5       | .                  | .       | intergenic | .      | rs789186517   | 2 |
| AAAC.GTTT   | 13 | 102101672 | 102101698 | 6.75    | .                  | .       | intergenic | .      | rs792934231   | 2 |
| AAAC.GTTT   | 13 | 102374342 | 102374370 | 7.25    | ENSSSCT00000027576 | DHX36   | intron     | -0.055 | rs786751763   | 2 |
| AAAC.GTTT   | 13 | 102374342 | 102374370 | 7.25    | ENSSSCT00000023601 | DHX36   | intron     | -0.055 | rs786751763   | 2 |
| AAAAC.GTTTT | 13 | 102493612 | 102493634 | 4.6     | .                  | .       | intergenic | 0.307  | rs793657473   | 2 |
| AAAAT.ATTTT | 13 | 102553299 | 102553318 | 3.33333 | .                  | .       | intergenic | 0.263  | rs787460942   | 2 |
| AAAT.ATTT   | 13 | 102661899 | 102661917 | 4.75    | .                  | .       | intergenic | .      | rs792694393   | 4 |
| AAAAC.GTTTT | 13 | 102669466 | 102669483 | 3.6     | .                  | .       | intergenic | .      | .             | 2 |
| AAC.GTT     | 13 | 102704558 | 102704578 | 7       | .                  | .       | intergenic | 0.144  | rs793010317   | 2 |
| AC.GT       | 13 | 102718545 | 102718555 | 5.5     | .                  | .       | intergenic | 0.016  | rs786625468   | 2 |
| AGGG.CCCT   | 13 | 102826124 | 102826140 | 4.25    | .                  | .       | intergenic | .      | rs792443788   | 2 |
| AT.AT       | 13 | 102906032 | 102906042 | 5.5     | .                  | .       | intergenic | -0.219 | rs793305148   | 2 |
| AT.AT       | 13 | 102963974 | 102963987 | 7       | .                  | .       | intergenic | 0.147  | .             | 4 |
| AAAT.ATTT   | 13 | 103010913 | 103010938 | 6.5     | .                  | .       | intergenic | 0.263  | rs789090036   | 2 |
| AAAC.GTTT   | 13 | 103287420 | 103287439 | 5       | .                  | .       | intergenic | 0.417  | rs792138217   | 2 |
| AAAAC.GTTTT | 13 | 103395404 | 103395431 | 4.66667 | .                  | .       | intergenic | 0.261  | rs792980948   | 2 |
| AG.CT       | 13 | 103561467 | 103561478 | 6       | .                  | .       | intergenic | 0.001  | rs792563150   | 3 |
| AATT.AATT   | 13 | 103741311 | 103741329 | 4.75    | ENSSSCT00000027200 | SLC33A1 | intron     | 0.197  | rs790585426   | 2 |
| AAAT.ATTT   | 13 | 103927942 | 103927969 | 7       | .                  | .       | intergenic | 0.251  | rs789226357   | 4 |
| AAAC.GTTT   | 13 | 104115063 | 104115081 | 4.75    | .                  | .       | intergenic | 0.58   | rs791098528   | 2 |
| AAAC.GTTT   | 13 | 104210745 | 104210769 | 6.25    | .                  | .       | intergenic | .      | rs792656031   | 2 |
| AT.AT       | 13 | 104314401 | 104314412 | 6       | ENSSSCT00000027152 | .       | intron     | 0.018  | rs788011014   | 2 |
| AAAC.GTTT   | 13 | 104748272 | 104748292 | 5.25    | .                  | .       | intergenic | -0.006 | rs790809350   | 2 |
| AAAC.GTTT   | 13 | 104776291 | 104776304 | 3.5     | .                  | .       | intergenic | 0.038  | rs787171606   | 2 |
| AG.CT       | 13 | 104949441 | 104949452 | 6       | ENSSSCT00000024993 | .       | intron     | .      | rs791614510   | 2 |
| AG.CT       | 13 | 105290920 | 105290930 | 5.5     | ENSSSCT00000012836 | VEPH1   | intron     | 0.247  | .             | 4 |
| AT.AT       | 13 | 105303909 | 105303924 | 8       | ENSSSCT00000012836 | VEPH1   | intron     | 0.051  | .             | 2 |
| AAAT.ATTT   | 13 | 105353537 | 105353560 | 6       | ENSSSCT00000012836 | VEPH1   | intron     | .      | rs787928575   | 2 |
| AAAAC.GTTTT | 13 | 106083206 | 106083233 | 5.6     | ENSSSCT00000025053 | SHOX2   | intron     | 0.675  | rs792821710   | 2 |
| AC.GT       | 13 | 106394767 | 106394785 | 9.5     | ENSSSCT00000030951 | .       | intron     | 0.465  | rs790114922   | 4 |
| AT.AT       | 13 | 106751717 | 106751728 | 6       | .                  | .       | intergenic | .      | rs791720596   | 2 |
| AATG.CATT   | 13 | 106840502 | 106840525 | 6       | .                  | .       | intergenic | -0.033 | rs791213632   | 2 |
| AG.CT       | 13 | 107102539 | 107102555 | 8.5     | .                  | .       | intergenic | .      | rs790112905   | 3 |

|              |    |           |           |         |                    |           |            |        |               |   |
|--------------|----|-----------|-----------|---------|--------------------|-----------|------------|--------|---------------|---|
| AAAG.CTTT    | 13 | 107121143 | 107121165 | 5.75    | .                  | .         | intergenic | 0.237  | rs791464063   | 2 |
| AG.CT        | 13 | 107356280 | 107356290 | 5.5     | .                  | .         | intergenic | -0.139 | .             | 4 |
| AAAC.GTTT    | 13 | 107399680 | 107399704 | 6.25    | .                  | .         | intergenic | .      | rs787084423   | 2 |
| AAAC.GTTT    | 13 | 107498666 | 107498681 | 4       | .                  | .         | intergenic | -0.094 | 241643 rs7929 | 2 |
| AC.GT        | 13 | 107536938 | 107536969 | 16      | .                  | .         | intergenic | -0.107 | .             | 2 |
| AT.AT        | 13 | 107756509 | 107756519 | 5.5     | .                  | .         | intergenic | -0.054 | .             | 2 |
| AAAC.GTTT    | 13 | 107820545 | 107820562 | 4.5     | .                  | .         | intergenic | 0.109  | rs788623457   | 2 |
| AAAC.GTTT    | 13 | 107955136 | 107955152 | 4.25    | ENSSSCT00000012839 | QCJ-SCHIP | intron     | -0.134 | .             | 2 |
| AG.CT        | 13 | 107997559 | 107997569 | 5.5     | .                  | .         | intergenic | .      | 347214 rs7915 | 2 |
| AAAT.ATTT    | 13 | 108011306 | 108011323 | 4.5     | .                  | .         | intergenic | 0.134  | 332429 rs7887 | 2 |
| AAAC.GTTT    | 13 | 108017582 | 108017603 | 5.5     | .                  | .         | intergenic | 0.097  | rs793807983   | 2 |
| AAC.GTT      | 13 | 108087899 | 108087912 | 4.66667 | ENSSSCT00000032569 | .         | intron     | -0.07  | rs787642274   | 2 |
| AT.AT        | 13 | 108684956 | 108684965 | 5       | .                  | .         | intergenic | 0.174  | rs788397120   | 2 |
| AAT.ATT      | 13 | 109179431 | 109179449 | 6.33333 | .                  | .         | intergenic | .      | .             | 2 |
| AAAT.ATTT    | 13 | 109207148 | 109207167 | 5       | .                  | .         | intergenic | .      | rs792303534   | 2 |
| AAAC.GTTT    | 13 | 109250690 | 109250711 | 5.5     | ENSSSCT00000024911 | NMD3      | intron     | .      | rs788276520   | 2 |
| AT.AT        | 13 | 109422859 | 109422879 | 10.5    | .                  | .         | intergenic | 0.078  | rs786688734   | 2 |
| AAAC.GTTT    | 13 | 109485440 | 109485454 | 3.75    | .                  | .         | intergenic | 0.256  | rs790814299   | 2 |
| AG.CT        | 13 | 109525191 | 109525203 | 6.5     | .                  | .         | intergenic | .      | rs791394089   | 4 |
| AAAC.GTTT    | 13 | 109593400 | 109593424 | 6.25    | .                  | .         | intergenic | 0.19   | rs792571797   | 2 |
| AAAG.CTTT    | 13 | 109598521 | 109598544 | 6       | .                  | .         | intergenic | 0.343  | rs786911075   | 2 |
| AT.AT        | 13 | 109751279 | 109751288 | 5       | .                  | .         | intergenic | 0.684  | rs789324854   | 3 |
| AAAAC.GTTTT  | 13 | 110063107 | 110063131 | 5       | .                  | .         | intergenic | 0.188  | rs792269303   | 2 |
| AT.AT        | 13 | 110105536 | 110105551 | 8       | .                  | .         | intergenic | 0.591  | 306736 rs7877 | 2 |
| AC.GT        | 13 | 110780330 | 110780349 | 10      | .                  | .         | intergenic | .      | rs792036269   | 2 |
| AAAT.ATTT    | 13 | 110848577 | 110848597 | 5.25    | .                  | .         | intergenic | .      | 130273 rs7919 | 2 |
| AT.AT        | 13 | 111389934 | 111389950 | 8.5     | .                  | .         | intergenic | .      | rs792574996   | 2 |
| AT.AT        | 13 | 111510711 | 111510723 | 6.5     | .                  | .         | intergenic | 0.055  | 384116 rs7893 | 2 |
| AC.GT        | 13 | 111584310 | 111584326 | 8.5     | .                  | .         | intergenic | -0.042 | .             | 3 |
| AG.CT        | 13 | 111937897 | 111937921 | 12.5    | .                  | .         | intergenic | .      | 742434 rs7895 | 5 |
| AG.CT        | 13 | 111986963 | 111986973 | 5.5     | .                  | .         | intergenic | .      | .             | 2 |
| AAC.GTT      | 13 | 112018107 | 112018121 | 5       | .                  | .         | intergenic | .      | .             | 4 |
| AATC.GATT    | 13 | 112080497 | 112080519 | 5.75    | .                  | .         | intergenic | 0.104  | rs787030142   | 2 |
| AAAC.GTTT    | 13 | 112112328 | 112112340 | 3.25    | .                  | .         | intergenic | -0.042 | .             | 2 |
| AAC.GTT      | 13 | 112348479 | 112348504 | 8.66667 | .                  | .         | intergenic | .      | rs792642979   | 2 |
| AT.AT        | 13 | 112473487 | 112473497 | 5.5     | .                  | .         | intergenic | -0.139 | rs786973025   | 2 |
| AAAC.GTTT    | 13 | 112483537 | 112483567 | 7.75    | .                  | .         | intergenic | .      | rs786664261   | 2 |
| AC.GT        | 13 | 112514175 | 112514189 | 7.5     | .                  | .         | intergenic | -0.026 | 290704 rs7879 | 2 |
| AT.AT        | 13 | 112679362 | 112679374 | 6.5     | .                  | .         | intergenic | 0.016  | .             | 2 |
| AC.GT        | 13 | 112762236 | 112762246 | 5.5     | ENSSSCT00000032326 | .         | intron     | .      | .             | 3 |
| AC.GT        | 13 | 112762236 | 112762246 | 5.5     | ENSSSCT00000012846 | SI        | intron     | .      | .             | 3 |
| AAAT.ATTT    | 13 | 112791651 | 112791662 | 3       | ENSSSCT00000012846 | SI        | intron     | -0.411 | rs786953802   | 2 |
| AAAAAT.ATTTT | 13 | 112800426 | 112800453 | 4.66667 | ENSSSCT00000012846 | SI        | intron     | 0.541  | 339880 rs7924 | 2 |
| AAAAT.ATTTT  | 13 | 113009972 | 113009993 | 4.4     | .                  | .         | intergenic | -0.139 | 746755 rs7896 | 2 |
| AG.CT        | 13 | 113057640 | 113057652 | 6.5     | .                  | .         | intergenic | -0.034 | rs790512242   | 2 |
| AC.GT        | 13 | 113096583 | 113096597 | 7.5     | .                  | .         | intergenic | 0.056  | rs793189608   | 2 |
| AT.AT        | 13 | 113117345 | 113117376 | 16      | .                  | .         | intergenic | .      | rs787246812   | 2 |
| AT.AT        | 13 | 113246286 | 113246300 | 7.5     | .                  | .         | intergenic | -0.116 | 350294 rs7895 | 2 |
| AC.GT        | 13 | 113250244 | 113250254 | 5.5     | .                  | .         | intergenic | 0.06   | rs788306182   | 3 |
| AT.AT        | 13 | 113748731 | 113748741 | 5.5     | .                  | .         | intergenic | -0.155 | .             | 2 |
| AG.CT        | 13 | 114048040 | 114048051 | 6       | .                  | .         | intergenic | -0.216 | rs708232354   | 2 |
| ACTAT.ATAGT  | 13 | 114465225 | 114465251 | 5.4     | .                  | .         | intergenic | -0.001 | rs793144495   | 2 |
| AT.AT        | 13 | 114892571 | 114892584 | 7       | ENSSSCT00000012848 | SERPINI2  | intron     | -0.114 | 371214 rs7932 | 2 |
| AAAC.GTTT    | 13 | 114904949 | 114904963 | 3.75    | .                  | .         | intergenic | 0.542  | rs790929373   | 2 |
| AC.GT        | 13 | 115066551 | 115066567 | 8.5     | .                  | .         | intergenic | 0.122  | rs789443203   | 2 |
| AAAAT.ATTTT  | 13 | 115212633 | 115212655 | 4.6     | .                  | .         | intergenic | 0.252  | .             | 2 |
| AT.AT        | 13 | 115307415 | 115307425 | 5.5     | .                  | .         | intergenic | .      | rs792665880   | 3 |
| AAT.ATT      | 13 | 115761554 | 115761571 | 6       | .                  | .         | intergenic | 0.062  | rs786403961   | 2 |
| AG.CT        | 13 | 116170768 | 116170785 | 9       | .                  | .         | intergenic | -0.12  | rs792756598   | 2 |
| AT.AT        | 13 | 116211173 | 116211182 | 5       | .                  | .         | intergenic | 0.021  | rs791701574   | 2 |
| AAAAC.GTTTT  | 13 | 116250305 | 116250328 | 4.8     | .                  | .         | intergenic | -0.052 | rs787147634   | 2 |
| ACAT.ATGT    | 13 | 116370713 | 116370727 | 3.75    | .                  | .         | intergenic | -0.083 | rs792515796   | 2 |
| AAAC.GTTT    | 13 | 116663391 | 116663408 | 4.5     | .                  | .         | intergenic | -0.056 | rs791072884   | 2 |
| AT.AT        | 13 | 116986260 | 116986279 | 10      | .                  | .         | intergenic | 1.03   | rs792186808   | 2 |
| AAAC.GTTT    | 13 | 117486241 | 117486259 | 4.75    | .                  | .         | intergenic | .      | 291156 rs7938 | 2 |
| AAC.GTT      | 13 | 117577815 | 117577828 | 4.66667 | ENSSSCT00000027451 | PHC3      | intron     | 0.208  | rs786912536   | 2 |
| AAC.GTT      | 13 | 117577815 | 117577828 | 4.66667 | ENSSSCT00000029926 | PHC3      | intron     | 0.208  | rs786912536   | 2 |
| AC.GT        | 13 | 117581998 | 117582007 | 5       | ENSSSCT00000027451 | PHC3      | intron     | 0.269  | .             | 2 |
| AC.GT        | 13 | 117581998 | 117582007 | 5       | ENSSSCT00000029926 | PHC3      | intron     | 0.269  | .             | 2 |
| AAATG.CATTT  | 13 | 117695069 | 117695107 | 7.8     | ENSSSCT00000012856 | PKC       | promoter   | 0.333  | .             | 2 |
| AC.GT        | 13 | 117813639 | 117813649 | 5.5     | .                  | .         | intergenic | 0.094  | rs790356292   | 2 |
| AAAC.GTTT    | 13 | 118425912 | 118425939 | 7       | .                  | .         | intergenic | 0.356  | rs792738519   | 2 |
| AC.GT        | 13 | 118570920 | 118570931 | 6       | .                  | .         | intergenic | 0.22   | .             | 2 |
| AATG.CATT    | 13 | 118583925 | 118583946 | 5.5     | .                  | .         | intergenic | 0.173  | rs696016252   | 2 |
| AAAAG.CTTTT  | 13 | 118935359 | 118935376 | 3.6     | .                  | .         | intergenic | 0.058  | rs793627670   | 2 |
| AAAAC.GTTTT  | 13 | 119033297 | 119033319 | 4.6     | .                  | .         | intergenic | 0.093  | rs792358020   | 2 |
| AC.GT        | 13 | 119059799 | 119059813 | 7.5     | .                  | .         | intergenic | .      | rs787642771   | 2 |
| AC.GT        | 13 | 119177905 | 119177916 | 6       | ENSSSCT00000012861 | PLD1      | intron     | .      | 364904 rs7872 | 2 |
| AAAAAT.ATTTT | 13 | 119405015 | 119405032 | 3       | ENSSSCT00000012862 | TMEM212   | intron     | -0.033 | rs790645566   | 2 |
| AAAC.GTTT    | 13 | 119876823 | 119876846 | 6       | ENSSSCT00000032717 | TNFSF10   | intron     | 0.071  | 393336 rs7886 | 2 |
| AAAC.GTTT    | 13 | 119876823 | 119876846 | 6       | ENSSSCT00000025711 | TNFSF10   | intron     | 0.071  | 393336 rs7886 | 2 |
| AAC.GTT      | 13 | 119878516 | 119878532 | 5.66667 | ENSSSCT00000032717 | TNFSF10   | intron     | 0.132  | rs793024408   | 2 |
| AAC.GTT      | 13 | 119878516 | 119878532 | 5.66667 | ENSSSCT00000025711 | TNFSF10   | intron     | 0.132  | rs793024408   | 2 |
| AAAT.ATTT    | 13 | 119942603 | 119942619 | 4.25    | .                  | .         | intergenic | .      | rs788195025   | 2 |

|              |    |           |           |         |                    |          |            |        |                 |   |
|--------------|----|-----------|-----------|---------|--------------------|----------|------------|--------|-----------------|---|
| AT.AT        | 13 | 119975726 | 119975746 | 10.5    | .                  | .        | intergenic | .      | .               | 2 |
| AT.AT        | 13 | 120180940 | 120180949 | 5       | .                  | .        | intergenic | .      | .               | 3 |
| AAAC.GTTT    | 13 | 120261803 | 120261822 | 5       | .                  | .        | intergenic | .      | rs98737 rs7897  | 3 |
| AC.GT        | 13 | 120639395 | 120639429 | 17.5    | .                  | .        | intergenic | .      | rs793813400     | 3 |
| AC.GT        | 13 | 120686315 | 120686334 | 10      | .                  | .        | intergenic | -0.153 | rs788684324     | 2 |
| AG.CT        | 13 | 120784799 | 120784808 | 5       | .                  | .        | intergenic | -0.075 | .               | 3 |
| AG.CT        | 13 | 120818340 | 120818349 | 5       | .                  | .        | intergenic | 0.028  | .               | 3 |
| AAT.ATT      | 13 | 121219370 | 121219395 | 8.66667 | .                  | .        | intergenic | -0.069 | rs790738475     | 2 |
| AT.AT        | 13 | 121295031 | 121295043 | 6.5     | .                  | .        | intergenic | .      | rs76764 rs7863  | 2 |
| ACC.GGT      | 13 | 121310641 | 121310654 | 4.66667 | .                  | .        | intergenic | 0.01   | .               | 2 |
| \AAAAG.CTTTT | 13 | 121341970 | 121341991 | 3.66667 | .                  | .        | intergenic | -0.272 | rs792584036     | 2 |
| \AAAAC.GTTTT | 13 | 121497017 | 121497052 | 6       | .                  | .        | intergenic | 0.012  | rs305784 rs7905 | 2 |
| AAC.GTT      | 13 | 121668771 | 121668793 | 7.66667 | .                  | .        | intergenic | 0.695  | rs786884213     | 2 |
| AAAC.GTTT    | 13 | 121697134 | 121697152 | 4.75    | .                  | .        | intergenic | 0.141  | rs790778976     | 5 |
| AAC.GTT      | 13 | 121883546 | 121883564 | 6.33333 | .                  | .        | intergenic | 0.121  | rs787038629     | 2 |
| AC.GT        | 13 | 121896331 | 121896340 | 5       | .                  | .        | intergenic | 0.122  | rs791388723     | 2 |
| AG.CT        | 13 | 122027241 | 122027254 | 7       | .                  | .        | intergenic | .      | rs792172764     | 2 |
| AAAC.GTTT    | 13 | 122520749 | 122520775 | 6.75    | ENSSSCT00000026159 | NAALADL2 | intron     | 0.049  | rs787512344     | 2 |
| AT.AT        | 13 | 122792084 | 122792094 | 5.5     | .                  | .        | intergenic | 0.027  | rs786807495     | 2 |
| AG.CT        | 13 | 122822063 | 122822075 | 6.5     | .                  | .        | intergenic | 0.204  | rs792434871     | 2 |
| AATC.GATT    | 13 | 122853256 | 122853285 | 7.5     | .                  | .        | intergenic | 0.213  | rs791403288     | 2 |
| AT.AT        | 13 | 122854733 | 122854746 | 7       | .                  | .        | intergenic | -0.21  | rs787327342     | 3 |
| AAAC.GTTT    | 13 | 123114005 | 123114027 | 5.75    | .                  | .        | intergenic | 0.11   | rs792705176     | 2 |
| AAC.GTT      | 13 | 123278462 | 123278489 | 9.33333 | .                  | .        | intergenic | .      | rs787130627     | 4 |
| \AAAAG.CTTTT | 13 | 123285637 | 123285654 | 3       | .                  | .        | intergenic | -0.002 | rs790779402     | 2 |
| AAC.GTT      | 13 | 123352048 | 123352064 | 5.66667 | .                  | .        | intergenic | .      | rs792221827     | 2 |
| AAAG.CTTT    | 13 | 123649881 | 123649893 | 3.25    | .                  | .        | intergenic | -0.035 | rs789359651     | 4 |
| AC.GT        | 13 | 123911817 | 123911829 | 6.5     | .                  | .        | intergenic | .      | rs788518138     | 4 |
| AAAC.GTTT    | 13 | 123927818 | 123927842 | 6.25    | .                  | .        | intergenic | .      | rs790713979     | 2 |
| AGC.GCT      | 13 | 124253148 | 124253162 | 5       | .                  | .        | intergenic | -0.193 | rs790396244     | 2 |
| AG.CT        | 13 | 124504948 | 124504957 | 5       | .                  | .        | intergenic | -0.005 | rs786669639     | 2 |
| AT.AT        | 13 | 124521424 | 124521435 | 6       | .                  | .        | intergenic | 0.023  | rs789120604     | 2 |
| AAAC.GTTT    | 13 | 124660839 | 124660877 | 9.75    | .                  | .        | intergenic | 0.095  | rs793568017     | 3 |
| AAAC.GTTT    | 13 | 125133918 | 125133936 | 4.75    | .                  | .        | intergenic | 0.141  | rs790723897     | 2 |
| AAAAC.GTTTT  | 13 | 125171216 | 125171249 | 6.8     | .                  | .        | intergenic | .      | rs774173 rs7904 | 3 |
| AC.GT        | 13 | 125366980 | 125366994 | 7.5     | .                  | .        | intergenic | 0.132  | rs300109 rs7869 | 4 |
| AAC.GTT      | 13 | 125524022 | 125524035 | 4.66667 | .                  | .        | intergenic | .      | .               | 5 |
| AG.CT        | 13 | 125904034 | 125904044 | 5.5     | .                  | .        | intergenic | .      | .               | 3 |
| AT.AT        | 13 | 125924036 | 125924048 | 6.5     | .                  | .        | intergenic | 0.037  | rs793428464     | 2 |
| AAC.GTT      | 13 | 125996320 | 125996333 | 4.66667 | .                  | .        | intergenic | 0.278  | rs788469901     | 2 |
| AT.AT        | 13 | 126007610 | 126007626 | 8.5     | .                  | .        | intergenic | -0.162 | rs351534 rs7905 | 3 |
| AAAC.GTTT    | 13 | 126206451 | 126206468 | 4.5     | .                  | .        | intergenic | 0.089  | rs791468118     | 2 |
| \CACAT.ATGTG | 13 | 126241107 | 126241148 | 7       | .                  | .        | intergenic | 0.191  | rs787176727     | 2 |
| AT.AT        | 13 | 126742251 | 126742260 | 5       | ENSSSCT00000012874 | MRPL47   | intron     | 0.194  | rs789124362     | 2 |
| AT.AT        | 13 | 126930210 | 126930220 | 5.5     | .                  | .        | intergenic | 1.591  | rs789657565     | 2 |
| AAG.CTT      | 13 | 126963303 | 126963325 | 7.66667 | ENSSSCT00000012877 | PEX5L    | intron     | .      | rs787535207     | 2 |
| AAG.CTT      | 13 | 127163765 | 127163779 | 5       | .                  | .        | intergenic | 0.294  | .               | 2 |
| AAAT.ATTT    | 13 | 127213121 | 127213148 | 7       | .                  | .        | intergenic | .      | .               | 2 |
| AATC.GATT    | 13 | 127335764 | 127335783 | 5       | .                  | .        | intergenic | 0.25   | rs788930436     | 2 |
| \AAATC.GATTT | 13 | 127461748 | 127461767 | 3.33333 | .                  | .        | intergenic | 0.285  | rs788240153     | 2 |
| AAAT.ATTT    | 13 | 127479934 | 127479948 | 3.75    | .                  | .        | intergenic | -0.171 | rs788574207     | 2 |
| AT.AT        | 13 | 127521978 | 127521987 | 5       | .                  | .        | intergenic | 0.153  | rs792663588     | 2 |
| AAC.GTT      | 13 | 127652543 | 127652571 | 9.66667 | .                  | .        | intergenic | 0.356  | rs790112653     | 4 |
| AC.GT        | 13 | 127822043 | 127822059 | 8.5     | ENSSSCT00000012878 | TTC14    | intron     | -0.151 | rs787291697     | 2 |
| AAAT.ATTT    | 13 | 127827950 | 127827979 | 7.5     | .                  | .        | intergenic | 0.297  | rs791880697     | 2 |
| AAAT.ATTT    | 13 | 128102344 | 128102358 | 3.75    | ENSSSCT00000027605 | FXR1     | intron     | 0.12   | rs792271396     | 2 |
| AAAT.ATTT    | 13 | 128102344 | 128102358 | 3.75    | ENSSSCT00000027021 | FXR1     | intron     | 0.12   | rs792271396     | 2 |
| AAAT.ATTT    | 13 | 128102344 | 128102358 | 3.75    | ENSSSCT00000012881 | FXR1     | intron     | 0.12   | rs792271396     | 2 |
| AC.GT        | 13 | 129037773 | 129037788 | 8       | .                  | .        | intergenic | 0.15   | .               | 4 |
| AAACC.GTTTT  | 13 | 129063729 | 129063766 | 7.6     | .                  | .        | intergenic | 0.298  | rs791808672     | 2 |
| AT.AT        | 13 | 129486712 | 129486724 | 6.5     | .                  | .        | intergenic | 0.373  | rs790052494     | 6 |
| AT.AT        | 13 | 129703643 | 129703663 | 10.5    | .                  | .        | intergenic | 0.221  | rs786718245     | 2 |
| AC.GT        | 13 | 129851225 | 129851235 | 5.5     | .                  | .        | intergenic | .      | .               | 2 |
| AAAT.ATTT    | 13 | 130321916 | 130321944 | 7.25    | .                  | .        | intergenic | .      | .               | 2 |
| AAT.ATT      | 13 | 130472086 | 130472103 | 6       | .                  | .        | intergenic | 0.3    | rs792273139     | 2 |
| AAGG.CCTT    | 13 | 130554696 | 130554730 | 8.75    | .                  | .        | intergenic | .      | rs793175875     | 2 |
| AAAAT.ATTTT  | 13 | 130966135 | 130966157 | 4.6     | .                  | .        | intergenic | .      | rs789731998     | 2 |
| AAAAT.ATTTT  | 13 | 131034758 | 131034792 | 7       | ENSSSCT00000012887 | KLHL24   | intron     | .      | .               | 2 |
| AAC.GTT      | 13 | 131239859 | 131239874 | 5.33333 | ENSSSCT00000012891 | PARL     | intron     | .      | .               | 5 |
| AC.GT        | 13 | 131279363 | 131279377 | 7.5     | ENSSSCT00000012892 | .        | intron     | 0.209  | rs790657095     | 2 |
| AC.GT        | 13 | 131299173 | 131299185 | 6.5     | ENSSSCT00000012893 | .        | promoter   | -0.11  | rs248674 rs7927 | 2 |
| AAAAC.GTTTT  | 13 | 131555759 | 131555791 | 6.6     | .                  | .        | intergenic | .      | rs340599 rs7921 | 2 |
| AC.GT        | 13 | 131561974 | 131561984 | 5.5     | .                  | .        | intergenic | .      | rs788915122     | 2 |
| AC.GT        | 13 | 131632998 | 131633010 | 6.5     | ENSSSCT00000024405 | PSMD2    | intron     | 2.544  | rs792578807     | 2 |
| AG.CT        | 13 | 131798573 | 131798589 | 8.5     | .                  | .        | intergenic | .      | rs788012927     | 2 |
| AC.GT        | 13 | 131961865 | 131961887 | 11.5    | ENSSSCT00000023583 | EPHB3    | intron     | 0.222  | .               | 2 |
| AC.GT        | 13 | 132269857 | 132269866 | 5       | ENSSSCT00000012900 | .        | intron     | 0.121  | rs786893416     | 2 |
| AC.GT        | 13 | 132282470 | 132282481 | 6       | ENSSSCT00000012900 | .        | intron     | 0.318  | rs787021117     | 3 |
| AATG.CATT    | 13 | 132319820 | 132319850 | 7.75    | ENSSSCT00000012900 | .        | intron     | 1.366  | rs792621711     | 2 |
| AATG.CATT    | 13 | 132319820 | 132319850 | 7.75    | ENSSSCT00000024055 | .        | intron     | 1.366  | rs792621711     | 2 |
| AAC.GTT      | 13 | 132598580 | 132598594 | 5       | .                  | .        | intergenic | .      | .               | 3 |
| AAAT.ATTT    | 13 | 132681196 | 132681212 | 4.25    | ENSSSCT00000024873 | EHHADH   | intron     | 0.351  | rs787772567     | 2 |
| AAC.GTT      | 13 | 133161636 | 133161651 | 5.33333 | .                  | .        | intergenic | .      | rs786338350     | 2 |
| AC.GT        | 13 | 133188493 | 133188502 | 5       | .                  | .        | intergenic | -0.192 | rs787311838     | 2 |

|             |    |           |           |         |                    |         |            |        |                 |   |
|-------------|----|-----------|-----------|---------|--------------------|---------|------------|--------|-----------------|---|
| AC.GT       | 13 | 133459799 | 133459828 | 15      | ENSSSCT00000024619 | DGKG    | intron     | -0.051 | .               | 2 |
| AG.CT       | 13 | 133734300 | 133734316 | 8.5     | .                  | .       | intergenic | .      | rs791765889     | 2 |
| AC.GT       | 13 | 133743610 | 133743621 | 6       | .                  | .       | intergenic | -0.229 | rs792006591     | 3 |
| AAAC.GTTT   | 13 | 134015870 | 134015892 | 5.75    | .                  | .       | intergenic | -0.035 | rs789797566     | 2 |
| AAAAC.GTTTT | 13 | 134144433 | 134144452 | 4       | .                  | .       | intergenic | -0.012 | rs793858143     | 2 |
| AATG.CATT   | 13 | 134150450 | 134150480 | 7.75    | .                  | .       | intergenic | 0.121  | rs30446 rs7916  | 2 |
| AT.AT       | 13 | 134394341 | 134394350 | 5       | ENSSSCT00000012917 | RTP1    | promoter   | -0.016 | rs786672394     | 3 |
| AAAAG.CTTTT | 13 | 134409793 | 134409821 | 4.83333 | .                  | .       | intergenic | .      | rs788982483     | 2 |
| AAC.GTT     | 13 | 134456468 | 134456483 | 5.33333 | .                  | .       | intergenic | .      | rs789654620     | 2 |
| AC.GT       | 13 | 134612007 | 134612016 | 5       | .                  | .       | intergenic | 0.058  | .               | 2 |
| AAAC.GTTT   | 13 | 134988391 | 134988408 | 4.5     | ENSSSCT00000026129 | .       | intron     | 0.037  | rs786337215     | 2 |
| AAAAC.GTTTT | 13 | 135029061 | 135029087 | 5.4     | ENSSSCT00000026129 | .       | intron     | .      | rs389136 rs7888 | 2 |
| AG.CT       | 13 | 135127252 | 135127264 | 6.5     | ENSSSCT00000026129 | .       | intron     | -0.145 | rs698227816     | 3 |
| AT.AT       | 13 | 135198265 | 135198276 | 6       | ENSSSCT00000026129 | .       | intron     | -0.018 | rs788135865     | 2 |
| AG.CT       | 13 | 135769869 | 135769880 | 6       | .                  | .       | intergenic | 0.081  | rs790652703     | 3 |
| AG.CT       | 13 | 135784246 | 135784271 | 13      | .                  | .       | intergenic | 0.077  | rs789471454     | 2 |
| AC.GT       | 13 | 135830244 | 135830257 | 7       | .                  | .       | intergenic | 0.334  | .               | 3 |
| AAAC.GTTT   | 13 | 135927635 | 135927663 | 7.25    | .                  | .       | intergenic | -0.034 | rs787611826     | 4 |
| AT.AT       | 13 | 136354209 | 136354224 | 8       | .                  | .       | intergenic | 0.092  | .               | 4 |
| AT.AT       | 13 | 136360218 | 136360227 | 5       | .                  | .       | intergenic | 0.85   | rs787012219     | 2 |
| AT.AT       | 13 | 136361212 | 136361227 | 8       | .                  | .       | intergenic | .      | rs789903405     | 2 |
| AAAT.ATTT   | 13 | 136373033 | 136373051 | 4.75    | .                  | .       | intergenic | -0.008 | .               | 2 |
| AAAT.ATTT   | 13 | 136756941 | 136756959 | 4.75    | ENSSSCT00000012925 | LEPREL1 | intron     | .      | rs788834472     | 2 |
| AG.CT       | 13 | 136783404 | 136783416 | 6.5     | ENSSSCT00000012925 | LEPREL1 | intron     | -0.274 | rs789974312     | 2 |
| AC.GT       | 13 | 136826938 | 136826952 | 7.5     | ENSSSCT00000012925 | LEPREL1 | intron     | -0.153 | rs791568582     | 2 |
| AG.CT       | 13 | 136864967 | 136864977 | 5.5     | .                  | .       | intergenic | -0.099 | rs792998124     | 2 |
| AG.CT       | 13 | 136900863 | 136900875 | 6.5     | .                  | .       | intergenic | -0.206 | rs759088 rs7875 | 3 |
| AAAC.GTTT   | 13 | 137527098 | 137527128 | 7.75    | .                  | .       | intergenic | -0.056 | rs787917532     | 2 |
| AAG.CTT     | 13 | 137626597 | 137626614 | 6       | ENSSSCT00000031033 | GMNC    | intron     | 0.467  | rs793620339     | 2 |
| AAG.CTT     | 13 | 137626597 | 137626614 | 6       | ENSSSCT00000027738 | GMNC    | intron     | 0.467  | rs793620339     | 2 |
| AAAAT.ATTTT | 13 | 137686253 | 137686272 | 4       | .                  | .       | intergenic | .      | rs791898150     | 2 |
| AT.AT       | 13 | 137714086 | 137714095 | 5       | .                  | .       | intergenic | .      | .               | 2 |
| AG.CT       | 13 | 137771377 | 137771388 | 6       | .                  | .       | intergenic | .      | rs357577 rs7876 | 2 |
| AAAT.ATTT   | 13 | 137867229 | 137867248 | 5       | .                  | .       | intergenic | .      | rs789619657     | 2 |
| AC.GT       | 13 | 138021424 | 138021443 | 10      | .                  | .       | intergenic | 0.344  | rs787678322     | 5 |
| AAAAC.GTTTT | 13 | 138047026 | 138047046 | 4.2     | ENSSSCT00000012929 | CCDC50  | intron     | .      | .               | 2 |
| AC.GT       | 13 | 138292995 | 138293012 | 9       | .                  | .       | intergenic | 0.308  | rs787517496     | 2 |
| AT.AT       | 13 | 138360831 | 138360841 | 5.5     | .                  | .       | intergenic | -0.185 | rs709617218     | 2 |
| AC.GT       | 13 | 138528131 | 138528142 | 6       | .                  | .       | intergenic | .      | rs791816415     | 4 |
| AT.AT       | 13 | 138545691 | 138545702 | 6       | .                  | .       | intergenic | 0.032  | .               | 4 |
| AAAT.ATTT   | 13 | 138589260 | 138589287 | 7       | .                  | .       | intergenic | 0.024  | rs792402764     | 2 |
| AG.CT       | 13 | 138633750 | 138633767 | 9       | .                  | .       | intergenic | 0.014  | rs793518551     | 2 |
| AC.GT       | 13 | 138778830 | 138778855 | 13      | ENSSSCT00000023418 | FGF12   | intron     | .      | rs268595 rs7865 | 3 |
| AT.AT       | 13 | 138938693 | 138938708 | 8       | ENSSSCT00000023418 | FGF12   | intron     | -0.127 | rs786606950     | 3 |
| AG.CT       | 13 | 139009543 | 139009554 | 6       | .                  | .       | intergenic | 0.119  | rs789916304     | 2 |
| AAAAT.ATTTT | 13 | 139010395 | 139010414 | 4       | .                  | .       | intergenic | 0.073  | rs788600753     | 2 |
| AT.AT       | 13 | 139134083 | 139134092 | 5       | .                  | .       | intergenic | 0.051  | rs790934105     | 2 |
| ACAG.CTGT   | 13 | 139155024 | 139155037 | 3.5     | .                  | .       | intergenic | 0.027  | rs789854648     | 2 |
| ATC.GAT     | 13 | 139687826 | 139687846 | 7       | .                  | .       | intergenic | .      | rs792304406     | 3 |
| AG.CT       | 13 | 139722928 | 139722941 | 7       | .                  | .       | intergenic | -0.009 | rs792628484     | 2 |
| AG.CT       | 13 | 139724373 | 139724384 | 6       | .                  | .       | intergenic | 0.043  | .               | 2 |
| AAC.GTT     | 13 | 139732841 | 139732860 | 6.66667 | .                  | .       | intergenic | 0.06   | rs786803869     | 3 |
| AT.AT       | 13 | 139893792 | 139893823 | 16      | ENSSSCT00000031000 | ATP13A5 | intron     | 0.404  | .               | 4 |
| AAAT.ATTT   | 13 | 139903906 | 139903923 | 4.5     | ENSSSCT00000031000 | ATP13A5 | intron     | -0.001 | rs791164603     | 2 |
| AC.GT       | 13 | 140210010 | 140210028 | 9.5     | ENSSSCT00000012934 | OPA1    | intron     | 0.223  | rs28844 rs7899  | 3 |
| AAAC.GTTT   | 13 | 140215587 | 140215609 | 5.75    | ENSSSCT00000012934 | OPA1    | intron     | 0.073  | rs789471023     | 2 |
| AAGG.CCTT   | 13 | 140223436 | 140223457 | 5.5     | ENSSSCT00000012934 | OPA1    | intron     | 0.029  | rs310921 rs7872 | 2 |
| AAAT.ATTT   | 13 | 140536540 | 140536556 | 4.25    | .                  | .       | intergenic | 0.16   | rs793068272     | 2 |
| AAAAC.GTTTT | 13 | 140609956 | 140609984 | 5.8     | .                  | .       | intergenic | 0.192  | rs793667527     | 2 |
| AC.GT       | 13 | 140726174 | 140726185 | 6       | .                  | .       | intergenic | 1.113  | rs789724059     | 2 |
| AC.GT       | 13 | 140873369 | 140873386 | 9       | .                  | .       | intergenic | -0.171 | rs790801237     | 2 |
| AAAC.GTTT   | 13 | 140994605 | 140994627 | 5.75    | ENSSSCT00000012937 | ATP13A3 | intron     | 0.129  | rs788348379     | 2 |
| AAAAT.ATTTT | 13 | 141144459 | 141144476 | 3.6     | .                  | .       | intergenic | .      | rs375044 rs7879 | 2 |
| AC.GT       | 13 | 141185431 | 141185443 | 6.5     | ENSSSCT00000012938 | TMEM44  | intron     | 0.123  | rs786784052     | 2 |
| AGAGG.CCTCT | 13 | 141271842 | 141271865 | 4.8     | .                  | .       | intergenic | 0.52   | rs302734 rs7886 | 2 |
| AAAC.GTTT   | 13 | 141279582 | 141279600 | 4.75    | .                  | .       | intergenic | 0.217  | rs787324582     | 2 |
| AT.AT       | 13 | 141304003 | 141304012 | 5       | .                  | .       | intergenic | .      | rs791348176     | 2 |
| AG.CT       | 13 | 141355537 | 141355549 | 6.5     | .                  | .       | intergenic | -0.132 | rs787486498     | 2 |
| AAAC.GTTT   | 13 | 141496653 | 141496676 | 6       | .                  | .       | intergenic | 0.12   | rs335428 rs7934 | 2 |
| AAAAC.GTTTT | 13 | 141644694 | 141644719 | 5.2     | .                  | .       | intergenic | .      | rs790714713     | 2 |
| AATG.CATT   | 13 | 141719591 | 141719621 | 7.75    | .                  | .       | intergenic | -0.147 | rs350182 rs7928 | 2 |
| ACAG.CTGT   | 13 | 142058289 | 142058302 | 3.5     | .                  | .       | intergenic | 0.248  | rs789340117     | 2 |
| AAAAT.ATTTT | 13 | 142109883 | 142109907 | 5       | .                  | .       | intergenic | 0.554  | rs790353432     | 2 |
| AG.CT       | 13 | 142166196 | 142166210 | 7.5     | .                  | .       | intergenic | 0.142  | rs789232144     | 2 |
| AAAAT.ATTTT | 13 | 142178470 | 142178489 | 4       | .                  | .       | intergenic | 0.003  | rs787425972     | 2 |
| AC.GT       | 13 | 142192310 | 142192334 | 12.5    | .                  | .       | intergenic | -0.18  | rs788991606     | 2 |
| AG.CT       | 13 | 142312085 | 142312099 | 7.5     | .                  | .       | intergenic | 0.089  | rs786911351     | 2 |
| AAC.GTT     | 13 | 142450287 | 142450303 | 5.66667 | ENSSSCT00000034060 | DLG1    | intron     | .      | rs788547417     | 2 |
| AAC.GTT     | 13 | 142450287 | 142450303 | 5.66667 | ENSSSCT00000012945 | DLG1    | intron     | .      | rs788547417     | 2 |
| AAC.GTT     | 13 | 142450287 | 142450303 | 5.66667 | ENSSSCT00000033279 | DLG1    | intron     | .      | rs788547417     | 2 |
| AAAC.GTTT   | 13 | 142692703 | 142692726 | 6       | .                  | .       | intergenic | .      | rs791195127     | 3 |
| AGG.CCT     | 13 | 142791558 | 142791574 | 5.66667 | .                  | .       | intergenic | .      | rs792097994     | 2 |
| AAC.GTT     | 13 | 142853788 | 142853803 | 5.33333 | ENSSSCT00000012953 | SENP5   | intron     | 0.152  | rs793863528     | 2 |
| AC.GT       | 13 | 142930813 | 142930825 | 6.5     | ENSSSCT00000012955 | .       | intron     | 0.041  | rs177736 rs7938 | 2 |



|             |    |           |           |         |                    |         |            |        |               |   |
|-------------|----|-----------|-----------|---------|--------------------|---------|------------|--------|---------------|---|
| AAT.ATT     | 13 | 143073994 | 143074008 | 5       | ENSSSCT00000023388 | CEP19   | 3'utr      | 2.103  | rs787893637   | 3 |
| AAAAC.GTTTT | 13 | 143177138 | 143177155 | 3.6     | .                  | .       | intergenic | .      | rs791771041   | 2 |
| AC.GT       | 13 | 143627339 | 143627349 | 5.5     | .                  | .       | intergenic | 0.25   | rs699935854   | 4 |
| AC.GT       | 13 | 143739728 | 143739741 | 7       | .                  | .       | intergenic | 0.08   | rs788174837   | 2 |
| AC.GT       | 13 | 143836549 | 143836558 | 5       | ENSSSCT00000012962 | MUC4    | intron     | -0.164 | .             | 4 |
| AAAAC.GTTTT | 13 | 143997771 | 143997796 | 5.2     | .                  | .       | intergenic | -0.087 | 374002 rs7898 | 2 |
| AGGC.GCCT   | 13 | 144104670 | 144104692 | 5.75    | ENSSSCT00000012966 | LRCH3   | intron     | 0.728  | rs790765043   | 2 |
| AAC.GTT     | 13 | 144175430 | 144175448 | 6.33333 | ENSSSCT00000012968 | IQCG    | intron     | .      | rs791332749   | 2 |
| AAAG.CTTT   | 13 | 144591312 | 144591327 | 4       | .                  | .       | intergenic | 0.258  | rs789586877   | 3 |
| AAAG.CTTT   | 13 | 144678474 | 144678492 | 4.75    | ENSSSCT00000012973 | SLC12A8 | intron     | 0.187  | rs793270485   | 2 |
| AAAAC.GTTTT | 13 | 145055246 | 145055266 | 4.2     | .                  | .       | intergenic | -0.061 | rs787102930   | 2 |
| AAAAC.GTTTT | 13 | 145129233 | 145129261 | 5.8     | ENSSSCT00000012978 | UMPS    | intron     | .      | rs786225280   | 2 |
| AAAAC.GTTTT | 13 | 145129233 | 145129261 | 5.8     | ENSSSCT00000027472 | UMPS    | intron     | .      | rs786225280   | 2 |
| AAAC.GTTT   | 13 | 145169844 | 145169870 | 6.75    | ENSSSCT00000023434 | .       | intron     | .      | rs791065965   | 2 |
| AAAC.GTTT   | 13 | 145190513 | 145190526 | 3.5     | ENSSSCT00000023434 | .       | intron     | 0.177  | .             | 2 |
| AG.CT       | 13 | 145291425 | 145291435 | 5.5     | ENSSSCT00000023434 | .       | intron     | .      | rs790370032   | 2 |
| AT.AT       | 13 | 145461833 | 145461842 | 5       | ENSSSCT00000029280 | .       | intron     | 0.017  | .             | 2 |
| AT.AT       | 13 | 145461833 | 145461842 | 5       | ENSSSCT00000023434 | .       | intron     | 0.017  | .             | 2 |
| AG.CT       | 13 | 145946976 | 145946988 | 6.5     | .                  | .       | intergenic | 0.334  | rs789325940   | 4 |
| AAAC.GTTT   | 13 | 145960014 | 145960028 | 3.75    | .                  | .       | intergenic | -0.153 | rs786573524   | 2 |
| AAAT.ATTT   | 13 | 146172486 | 146172498 | 3.25    | .                  | .       | intergenic | 0.117  | rs792250699   | 2 |
| AAAT.ATTT   | 13 | 146181176 | 146181196 | 5.25    | .                  | .       | intergenic | .      | rs790864816   | 2 |
| AAAAG.CTTTT | 13 | 146655987 | 146656013 | 4.5     | ENSSSCT00000029344 | ADCY5   | intron     | 0.103  | rs786979273   | 2 |
| AAAC.GTTT   | 13 | 147250196 | 147250210 | 3.75    | .                  | .       | intergenic | .      | 109542 rs7874 | 2 |
| AAAAC.GTTTT | 13 | 147331504 | 147331528 | 5       | .                  | .       | intergenic | 0.082  | rs792631141   | 2 |
| ATC.GAT     | 13 | 147438046 | 147438060 | 5       | ENSSSCT00000012988 | PARP14  | intron     | .      | rs788994819   | 2 |
| AAAT.ATTT   | 13 | 147489070 | 147489087 | 4.5     | .                  | .       | intergenic | .      | 336254 rs7908 | 2 |
| AT.AT       | 13 | 147527557 | 147527566 | 5       | ENSSSCT00000012989 | PARP15  | intron     | -0.22  | rs792600023   | 2 |
| AGG.CCT     | 13 | 147621806 | 147621819 | 4.66667 | .                  | .       | intergenic | 0.137  | rs790038331   | 2 |
| AAAAT.ATTTT | 13 | 147766094 | 147766109 | 3.2     | ENSSSCT00000030693 | CCDC58  | intron     | 0.193  | rs691169158   | 2 |
| AAAC.GTTT   | 13 | 147774497 | 147774513 | 4.25    | ENSSSCT00000030693 | CCDC58  | intron     | 0.277  | rs787959677   | 2 |
| AAAGG.CCTTT | 13 | 147914053 | 147914075 | 4.6     | ENSSSCT00000012993 | CASR    | intron     | 0.149  | rs786937055   | 2 |
| AT.AT       | 13 | 148003591 | 148003602 | 6       | .                  | .       | intergenic | .      | .             | 4 |
| AT.AT       | 13 | 148035260 | 148035272 | 6.5     | .                  | .       | intergenic | .      | rs793053275   | 2 |
| AC.GT       | 13 | 148076877 | 148076894 | 9       | ENSSSCT00000012992 | CD86    | intron     | 0.217  | rs791900845   | 2 |
| AC.GT       | 13 | 148076877 | 148076894 | 9       | ENSSSCT00000036378 | CD86    | intron     | 0.217  | rs791900845   | 2 |
| AC.GT       | 13 | 148076877 | 148076894 | 9       | ENSSSCT00000034076 | CD86    | intron     | 0.217  | rs791900845   | 2 |
| AC.GT       | 13 | 148076877 | 148076894 | 9       | ENSSSCT00000033968 | CD86    | intron     | 0.217  | rs791900845   | 2 |
| AC.GT       | 13 | 148076877 | 148076894 | 9       | ENSSSCT00000012991 | CD86    | intron     | 0.217  | rs791900845   | 2 |
| AC.GT       | 13 | 148076877 | 148076894 | 9       | ENSSSCT00000034541 | CD86    | intron     | 0.217  | rs791900845   | 2 |
| AAAC.GTTT   | 13 | 148083231 | 148083249 | 4.75    | ENSSSCT00000012992 | CD86    | intron     | 0.116  | rs788596982   | 3 |
| AAAC.GTTT   | 13 | 148083231 | 148083249 | 4.75    | ENSSSCT00000036378 | CD86    | intron     | 0.116  | rs788596982   | 3 |
| AAAC.GTTT   | 13 | 148083231 | 148083249 | 4.75    | ENSSSCT00000034076 | CD86    | intron     | 0.116  | rs788596982   | 3 |
| AAAC.GTTT   | 13 | 148083231 | 148083249 | 4.75    | ENSSSCT00000033968 | CD86    | intron     | 0.116  | rs788596982   | 3 |
| AAAC.GTTT   | 13 | 148083231 | 148083249 | 4.75    | ENSSSCT00000012991 | CD86    | intron     | 0.116  | rs788596982   | 3 |
| AAAC.GTTT   | 13 | 148083231 | 148083249 | 4.75    | ENSSSCT00000034541 | CD86    | intron     | 0.116  | rs788596982   | 3 |
| AAAC.GTTT   | 13 | 148083231 | 148083249 | 4.75    | ENSSSCT00000034788 | CD86    | intron     | 0.116  | rs788596982   | 3 |
| AAC.GTT     | 13 | 148326723 | 148326734 | 4       | ENSSSCT00000012997 | IQCB1   | intron     | .      | rs790725308   | 2 |
| AAC.GTT     | 13 | 148539457 | 148539476 | 6.66667 | .                  | .       | intergenic | .      | 140389 rs7881 | 2 |
| AT.AT       | 13 | 148570084 | 148570095 | 6       | .                  | .       | intergenic | .      | rs787269734   | 2 |
| AAGG.CCTT   | 13 | 149118429 | 149118443 | 3.75    | .                  | .       | intergenic | 0.299  | rs791311114   | 2 |
| AAAC.GTTT   | 13 | 149251682 | 149251705 | 6       | .                  | .       | intergenic | 0.249  | rs788647036   | 2 |
| AAC.GTT     | 13 | 149313625 | 149313639 | 5       | ENSSSCT00000013005 | GPR156  | intron     | 0.356  | rs791623059   | 2 |
| AAAC.GTTT   | 13 | 149329403 | 149329420 | 4.5     | ENSSSCT00000013005 | GPR156  | intron     | .      | 327338 rs7895 | 2 |
| AAG.CTT     | 13 | 149373063 | 149373080 | 6       | .                  | .       | intergenic | 0.213  | 175357 rs7911 | 2 |
| AAAT.ATTT   | 13 | 149475743 | 149475770 | 7       | ENSSSCT00000013006 | GSK3B   | intron     | .      | rs786974269   | 2 |
| AAC.GTT     | 13 | 149894909 | 149894934 | 8.66667 | .                  | .       | intergenic | .      | rs787055834   | 2 |
| AT.AT       | 13 | 150021411 | 150021423 | 6.5     | .                  | .       | intergenic | 0.098  | rs792989684   | 2 |
| AAAC.GTTT   | 13 | 150103149 | 150103167 | 4.75    | ENSSSCT00000013023 | TMEM39A | intron     | 0.047  | rs792128773   | 2 |
| AAC.GTT     | 13 | 150361287 | 150361298 | 4       | .                  | .       | intergenic | .      | .             | 3 |
| AAAC.GTTT   | 13 | 150617008 | 150617023 | 4       | .                  | .       | intergenic | 0.017  | rs787979579   | 4 |
| AT.AT       | 13 | 150693668 | 150693678 | 5.5     | .                  | .       | intergenic | 0.357  | .             | 2 |
| AT.AT       | 13 | 150708276 | 150708292 | 8.5     | .                  | .       | intergenic | 1.38   | rs791831087   | 3 |
| AT.AT       | 13 | 150954994 | 150955004 | 5.5     | .                  | .       | intergenic | .      | rs712127282   | 3 |
| AT.AT       | 13 | 151318004 | 151318014 | 5.5     | .                  | .       | intergenic | 0.086  | 366683 rs7867 | 3 |
| AAAT.ATTT   | 13 | 151396601 | 151396622 | 5.5     | .                  | .       | intergenic | 0.014  | rs788454805   | 2 |
| AC.GT       | 13 | 151867762 | 151867773 | 6       | .                  | .       | intergenic | 1.072  | .             | 2 |
| AC.GT       | 13 | 152048102 | 152048112 | 5.5     | .                  | .       | intergenic | 0.232  | .             | 2 |
| AC.GT       | 13 | 152204542 | 152204559 | 9       | .                  | .       | intergenic | -0.112 | 755740 rs7871 | 3 |
| ACAT.ATGT   | 13 | 152797969 | 152797987 | 4.75    | .                  | .       | intergenic | -0.075 | .             | 4 |
| AT.AT       | 13 | 152808638 | 152808651 | 7       | .                  | .       | intergenic | 0.6    | rs786280746   | 2 |
| AAAC.GTTT   | 13 | 152961942 | 152961968 | 6.75    | .                  | .       | intergenic | -0.088 | rs792070512   | 2 |
| AC.GT       | 13 | 153239777 | 153239787 | 5.5     | ENSSSCT00000021219 | SNORD12 | promoter   | -0.197 | .             | 2 |
| AC.GT       | 13 | 153308795 | 153308809 | 7.5     | .                  | .       | intergenic | 0.155  | .             | 2 |
| AAAC.GTTT   | 13 | 153622839 | 153622863 | 6.25    | ENSSSCT00000030211 | LSAMP   | intron     | .      | .             | 2 |
| AT.AT       | 13 | 153712761 | 153712772 | 6       | ENSSSCT00000030211 | LSAMP   | intron     | .      | rs787696803   | 2 |
| AC.GT       | 13 | 153739483 | 153739497 | 7.5     | ENSSSCT00000030211 | LSAMP   | intron     | 0.339  | rs786357110   | 2 |
| AT.AT       | 13 | 153904957 | 153904983 | 13.5    | .                  | .       | intergenic | .      | rs696175118   | 3 |
| AC.GT       | 13 | 153947288 | 153947317 | 15      | .                  | .       | intergenic | 0.143  | rs699793355   | 4 |
| ACAT.ATGT   | 13 | 154016772 | 154016794 | 5.75    | .                  | .       | intergenic | .      | rs792635342   | 2 |
| AATG.CATT   | 13 | 154305306 | 154305334 | 7.25    | .                  | .       | intergenic | 0.222  | 394868 rs7899 | 2 |
| AAT.ATT     | 13 | 154318192 | 154318211 | 6.66667 | .                  | .       | intergenic | .      | rs789434079   | 2 |
| AG.CT       | 13 | 154898781 | 154898792 | 6       | .                  | .       | intergenic | 1.265  | rs788641945   | 2 |
| AAC.GTT     | 13 | 154943397 | 154943413 | 5.66667 | .                  | .       | intergenic | 0.393  | 332922 rs7868 | 2 |



|             |    |           |           |         |                    |         |            |        |               |   |
|-------------|----|-----------|-----------|---------|--------------------|---------|------------|--------|---------------|---|
| AAC.GTT     | 13 | 155027825 | 155027839 | 5       | .                  | .       | intergenic | 0.652  | rs786823913   | 2 |
| AAT.ATT     | 13 | 155348367 | 155348386 | 6.66667 | ENSSSCT00000013034 | .       | intron     | .      | rs791675414   | 2 |
| AC.GT       | 13 | 155534032 | 155534048 | 8.5     | ENSSSCT00000013036 | .       | intron     | 0.724  | rs786744009   | 3 |
| AAT.ATT     | 13 | 155560966 | 155560979 | 4.66667 | ENSSSCT00000013036 | .       | intron     | .      | rs792161369   | 2 |
| AAAG.CTTT   | 13 | 155766722 | 155766735 | 3.5     | ENSSSCT00000013040 | ATP6V1A | intron     | 0.297  | rs788858587   | 2 |
| AT.AT       | 13 | 155769527 | 155769536 | 5       | ENSSSCT00000013040 | ATP6V1A | intron     | 0.141  | rs792942614   | 2 |
| AAT.ATT     | 13 | 156235908 | 156235924 | 5.66667 | .                  | .       | intergenic | 0.009  | 341520 rs7916 | 3 |
| AC.GT       | 13 | 156934258 | 156934276 | 9.5     | .                  | .       | intergenic | .      | .             | 2 |
| AC.GT       | 13 | 157474396 | 157474420 | 12.5    | .                  | .       | intergenic | -0.007 | 176408 rs7916 | 3 |
| AAC.GTT     | 13 | 157637754 | 157637767 | 4.66667 | .                  | .       | intergenic | 0.863  | rs793211901   | 2 |
| AAAC.GTTT   | 13 | 157716108 | 157716119 | 3       | .                  | .       | intergenic | .      | 169038 rs7934 | 2 |
| ACC.GGT     | 13 | 157771634 | 157771650 | 5.66667 | .                  | .       | intergenic | .      | .             | 2 |
| AAC.GTT     | 13 | 157972944 | 157972970 | 9       | .                  | .       | intergenic | .      | 313156 rs7868 | 2 |
| AAT.ATT     | 13 | 158043035 | 158043061 | 9       | .                  | .       | intergenic | -0.098 | rs789535702   | 2 |
| AAT.ATT     | 13 | 158081632 | 158081662 | 10.3333 | .                  | .       | intergenic | 0.063  | 205113 rs7899 | 2 |
| AAG.CTT     | 13 | 158806181 | 158806192 | 4       | .                  | .       | intergenic | -0.123 | 343761 rs7936 | 2 |
| AC.GT       | 13 | 158920709 | 158920719 | 5.5     | ENSSSCT00000013059 | .       | intron     | -0.042 | .             | 3 |
| AAAAG.CTTT  | 13 | 159002448 | 159002464 | 3.4     | ENSSSCT00000013058 | PLCXD2  | intron     | 0.336  | 330656 rs7883 | 2 |
| AC.GT       | 13 | 159082620 | 159082630 | 5.5     | .                  | .       | intergenic | 0.113  | .             | 2 |
| AAAAG.CTTT  | 13 | 159275738 | 159275769 | 6.4     | ENSSSCT00000031200 | DPPA4   | intron     | 1.16   | rs788466515   | 2 |
| AAAAG.CTTT  | 13 | 159275738 | 159275769 | 6.4     | ENSSSCT00000027112 | DPPA4   | intron     | 1.16   | rs788466515   | 2 |
| AT.AT       | 13 | 159313066 | 159313079 | 7       | .                  | .       | intergenic | .      | rs791748282   | 4 |
| AG.CT       | 13 | 159830276 | 159830286 | 5.5     | .                  | .       | intergenic | -0.264 | rs792844859   | 2 |
| AAC.GTT     | 13 | 159954451 | 159954466 | 5.33333 | ENSSSCT00000013065 | DZIP3   | intron     | 0.36   | rs792296243   | 2 |
| AG.CT       | 13 | 160108386 | 160108402 | 8.5     | ENSSSCT00000027252 | MYH15   | intron     | .      | .             | 4 |
| AAAT.ATTT   | 13 | 160110786 | 160110833 | 12      | ENSSSCT00000027252 | MYH15   | intron     | .      | 325848 rs7891 | 2 |
| AAG.CTT     | 13 | 160189915 | 160189947 | 11      | ENSSSCT00000027252 | MYH15   | intron     | .      | rs793582277   | 2 |
| AAAC.GTTT   | 13 | 160321123 | 160321142 | 5       | .                  | .       | intergenic | 0.382  | rs787184927   | 2 |
| AAAC.GTTT   | 13 | 160409508 | 160409535 | 7       | .                  | .       | intergenic | 0.206  | rs788900157   | 2 |
| AAAAT.ATTTT | 13 | 160513422 | 160513449 | 5.6     | ENSSSCT00000013068 | CD47    | intron     | 0.055  | 119380 rs7893 | 2 |
| AG.CT       | 13 | 160544654 | 160544666 | 6.5     | .                  | .       | intergenic | -0.078 | 193601 rs7917 | 2 |
| AT.AT       | 13 | 160683677 | 160683689 | 6.5     | .                  | .       | intergenic | 0.219  | rs787859164   | 2 |
| AAAT.ATTT   | 13 | 160695791 | 160695816 | 6.5     | .                  | .       | intergenic | .      | rs791651928   | 2 |
| AAAT.ATTT   | 13 | 160782423 | 160782438 | 4       | ENSSSCT00000013069 | .       | intron     | 0.316  | rs791156694   | 2 |
| AC.GT       | 13 | 160814541 | 160814555 | 7.5     | ENSSSCT00000013069 | .       | intron     | 0.156  | .             | 3 |
| AAAT.ATTT   | 13 | 161062984 | 161063002 | 4.75    | .                  | .       | intergenic | 0.325  | 748752 rs7905 | 2 |
| AAC.GTT     | 13 | 161154826 | 161154842 | 5.66667 | .                  | .       | intergenic | 0.238  | rs792185447   | 2 |
| AC.GT       | 13 | 161162491 | 161162501 | 5.5     | .                  | .       | intergenic | 0.113  | 198190 rs7870 | 2 |
| AAAG.CTTT   | 13 | 161472337 | 161472353 | 4.25    | .                  | .       | intergenic | .      | 358713 rs7887 | 2 |
| AGG.CCT     | 13 | 161556855 | 161556869 | 5       | .                  | .       | intergenic | 0.872  | rs789205550   | 2 |
| AAAT.ATTT   | 13 | 161559694 | 161559719 | 6.5     | .                  | .       | intergenic | 0.127  | rs792272132   | 2 |
| ACCT.AGGT   | 13 | 161897561 | 161897583 | 5.75    | .                  | .       | intergenic | -0.01  | 261995 rs7897 | 2 |
| AT.AT       | 13 | 161958460 | 161958472 | 6.5     | .                  | .       | intergenic | -0.033 | 368608 rs7934 | 2 |
| AAAC.GTTT   | 13 | 162051542 | 162051562 | 5.25    | .                  | .       | intergenic | .      | rs789681176   | 2 |
| AAG.CTT     | 13 | 162141772 | 162141786 | 5       | .                  | .       | intergenic | 0.224  | rs792238671   | 2 |
| AAAAC.GTTT  | 13 | 162547865 | 162547892 | 5.6     | .                  | .       | intergenic | 0.029  | rs787095509   | 2 |
| AAAC.GTTT   | 13 | 162706954 | 162706969 | 4       | ENSSSCT00000023448 | CBLB    | intron     | 0.208  | rs789067102   | 2 |
| AAC.GTT     | 13 | 162726972 | 162726990 | 6.33333 | ENSSSCT00000023448 | CBLB    | intron     | 0.211  | 718077 rs7924 | 2 |
| AAC.GTT     | 13 | 163328634 | 163328654 | 7       | .                  | .       | intergenic | .      | 341565 rs7874 | 2 |
| AAGG.CCTT   | 13 | 163443520 | 163443535 | 4       | .                  | .       | intergenic | 0.084  | rs790592012   | 2 |
| AAAC.GTTT   | 13 | 163662165 | 163662187 | 5.75    | .                  | .       | intergenic | -0.193 | rs790541607   | 2 |
| AC.GT       | 13 | 163684540 | 163684549 | 5       | .                  | .       | intergenic | 0.095  | rs786954588   | 2 |
| ATC.GAT     | 13 | 163853861 | 163853882 | 7.33333 | .                  | .       | intergenic | -0.093 | rs789411713   | 2 |
| AT.AT       | 13 | 163887139 | 163887150 | 6       | .                  | .       | intergenic | -0.037 | .             | 2 |
| AAAAC.GTTT  | 13 | 163947372 | 163947398 | 5.4     | .                  | .       | intergenic | 0.239  | 269576 rs7933 | 3 |
| AAAAG.CTTT  | 13 | 163967058 | 163967077 | 3.33333 | .                  | .       | intergenic | -0.102 | rs787190325   | 2 |
| AT.AT       | 13 | 163975536 | 163975547 | 6       | .                  | .       | intergenic | .      | rs711374830   | 4 |
| AAGG.CCTT   | 13 | 164152034 | 164152077 | 11      | .                  | .       | intergenic | -0.048 | rs792804608   | 2 |
| AT.AT       | 13 | 164179286 | 164179296 | 5.5     | .                  | .       | intergenic | -0.005 | 353214 rs7874 | 2 |
| AT.AT       | 13 | 164252760 | 164252769 | 5       | .                  | .       | intergenic | 0.147  | rs786300329   | 2 |
| AAAT.ATTT   | 13 | 164269080 | 164269104 | 6.25    | .                  | .       | intergenic | .      | rs791689337   | 2 |
| AAAT.ATTT   | 13 | 164371706 | 164371721 | 4       | .                  | .       | intergenic | -0.081 | rs789621187   | 2 |
| AAAT.ATTT   | 13 | 164541418 | 164541447 | 7.5     | .                  | .       | intergenic | -0.112 | rs788781691   | 2 |
| AAG.CTT     | 13 | 164559987 | 164560002 | 5.33333 | .                  | .       | intergenic | -0.246 | rs787841569   | 3 |
| AAAC.GTTT   | 13 | 164564030 | 164564048 | 4.75    | .                  | .       | intergenic | 0.018  | 228210 rs7913 | 2 |
| AGAT.ATCT   | 13 | 164566557 | 164566595 | 9.75    | .                  | .       | intergenic | 0.116  | rs697092002   | 2 |
| AAAC.GTTT   | 13 | 164601685 | 164601703 | 4.75    | .                  | .       | intergenic | .      | 337343 rs7862 | 2 |
| AAAC.GTTT   | 13 | 164611175 | 164611210 | 9       | .                  | .       | intergenic | .      | 356820 rs7878 | 2 |
| AC.GT       | 13 | 164872284 | 164872299 | 8       | .                  | .       | intergenic | -0.158 | .             | 2 |
| AT.AT       | 13 | 164996689 | 164996708 | 10      | .                  | .       | intergenic | -0.794 | rs787828684   | 2 |
| AT.AT       | 13 | 165042092 | 165042103 | 6       | .                  | .       | intergenic | .      | rs786714749   | 2 |
| AGG.CCT     | 13 | 165091901 | 165091919 | 6.33333 | .                  | .       | intergenic | .      | rs791749649   | 2 |
| AC.GT       | 13 | 165272797 | 165272809 | 6.5     | .                  | .       | intergenic | -0.069 | rs789846434   | 2 |
| AT.AT       | 13 | 165282781 | 165282793 | 6.5     | .                  | .       | intergenic | -0.123 | .             | 4 |
| AAAC.GTTT   | 13 | 165406862 | 165406880 | 4.75    | .                  | .       | intergenic | 0.027  | rs790289507   | 2 |
| AAT.ATT     | 13 | 165411436 | 165411449 | 4.66667 | .                  | .       | intergenic | 0.035  | rs793275597   | 2 |
| AAC.GTT     | 13 | 165684375 | 165684388 | 4.66667 | .                  | .       | intergenic | 0.103  | .             | 4 |
| AAC.GTT     | 13 | 165881342 | 165881373 | 10.6667 | .                  | .       | intergenic | 0.609  | rs788256489   | 2 |
| AT.AT       | 13 | 165913500 | 165913520 | 10.5    | .                  | .       | intergenic | -0.1   | rs787176383   | 2 |
| AAAC.GTTT   | 13 | 165940639 | 165940661 | 5.75    | .                  | .       | intergenic | 0.167  | 341470 rs7908 | 2 |
| AAAT.ATTT   | 13 | 166234697 | 166234722 | 6.5     | .                  | .       | intergenic | 0.157  | rs791926704   | 2 |
| AC.GT       | 13 | 166459971 | 166459983 | 6.5     | .                  | .       | intergenic | 0.179  | 230905 rs7911 | 3 |
| AAAAC.GTTT  | 13 | 166740307 | 166740330 | 4.8     | .                  | .       | intergenic | 0.102  | rs786817495   | 2 |
| AC.GT       | 13 | 166994230 | 166994240 | 5.5     | ENSSSCT00000032455 | .       | intron     | .      | rs793426165   | 3 |

|              |    |           |           |         |                    |        |            |        |               |   |
|--------------|----|-----------|-----------|---------|--------------------|--------|------------|--------|---------------|---|
| AG.CT        | 13 | 166995067 | 166995078 | 6       | ENSSSCT00000032455 | .      | intron     | 0.258  | .             | 2 |
| AG.CT        | 13 | 167075180 | 167075191 | 6       | ENSSSCT00000022387 | SENP7  | intron     | 0.342  | .             | 2 |
| AT.AT        | 13 | 167113665 | 167113676 | 6       | ENSSSCT00000022387 | SENP7  | intron     | 0.323  | 311458 rs7916 | 3 |
| AAAC.GTTT    | 13 | 167165438 | 167165464 | 6.75    | .                  | .      | intergenic | 0.377  | 334131 rs7863 | 2 |
| AAAT.ATTT    | 13 | 167418393 | 167418420 | 7       | .                  | .      | intergenic | .      | rs791737886   | 2 |
| AAAT.ATTT    | 13 | 167428811 | 167428828 | 4.5     | .                  | .      | intergenic | .      | .             | 2 |
| AT.AT        | 13 | 167441552 | 167441561 | 5       | .                  | .      | intergenic | .      | rs787955841   | 2 |
| AC.GT        | 13 | 167554799 | 167554811 | 6.5     | .                  | .      | intergenic | 0.056  | 320706 rs7864 | 2 |
| AC.GT        | 13 | 167567178 | 167567192 | 7.5     | .                  | .      | intergenic | .      | rs793315119   | 2 |
| AC.GT        | 13 | 167599518 | 167599546 | 14.5    | .                  | .      | intergenic | -0.077 | rs789213025   | 3 |
| AC.GT        | 13 | 167702326 | 167702337 | 6       | .                  | .      | intergenic | -0.054 | 740885 rs7922 | 2 |
| AC.GT        | 13 | 167818135 | 167818155 | 10.5    | ENSSSCT00000013085 | .      | intron     | 0.12   | 721935 rs7929 | 3 |
| AC.GT        | 13 | 168101607 | 168101637 | 15.5    | ENSSSCT00000013092 | .      | intron     | 0.241  | .             | 4 |
| AC.GT        | 13 | 168262494 | 168262507 | 7       | .                  | .      | intergenic | .      | rs786433717   | 2 |
| AT.AT        | 13 | 168451131 | 168451144 | 7       | .                  | .      | intergenic | -0.33  | 220478 rs7866 | 2 |
| AAAC.GTTT    | 13 | 168490392 | 168490410 | 4.75    | ENSSSCT00000013098 | CMSS1  | intron     | 0.329  | .             | 2 |
| AAAC.GTTT    | 13 | 168994126 | 168994140 | 3.75    | .                  | .      | intergenic | .      | rs787751584   | 2 |
| AC.GT        | 13 | 169218953 | 169218968 | 8       | .                  | .      | intergenic | 0.254  | 349646 rs7880 | 2 |
| AC.GT        | 13 | 169750579 | 169750591 | 6.5     | .                  | .      | intergenic | .      | .             | 3 |
| AAAG.CTTT    | 13 | 169965337 | 169965369 | 8.25    | .                  | .      | intergenic | .      | rs790371034   | 2 |
| AAAT.ATTT    | 13 | 170101700 | 170101725 | 6.5     | .                  | .      | intergenic | .      | 787780 rs7889 | 2 |
| AAC.GTT      | 13 | 170116315 | 170116328 | 4.66667 | .                  | .      | intergenic | .      | rs790417242   | 3 |
| AATT.AATT    | 13 | 170326156 | 170326170 | 3.75    | .                  | .      | intergenic | .      | .             | 2 |
| AT.AT        | 13 | 170358493 | 170358503 | 5.5     | ENSSSCT00000013106 | DCBLD2 | intron     | 0.044  | rs793258559   | 2 |
| AC.GT        | 13 | 170407659 | 170407688 | 15      | .                  | .      | intergenic | -0.07  | rs791588820   | 2 |
| AAAAG.CTTTT  | 13 | 170488620 | 170488638 | 3.8     | .                  | .      | intergenic | .      | rs788397586   | 2 |
| AAAC.GTTT    | 13 | 170839623 | 170839651 | 7.25    | .                  | .      | intergenic | .      | rs791981861   | 2 |
| AAAC.GTTT    | 13 | 170849056 | 170849077 | 5.5     | .                  | .      | intergenic | .      | rs787926568   | 3 |
| AAAAT.ATTTT  | 13 | 170876561 | 170876581 | 4.2     | .                  | .      | intergenic | .      | rs789840925   | 2 |
| AAAC.GTTT    | 13 | 171009845 | 171009867 | 5.75    | .                  | .      | intergenic | .      | .             | 2 |
| AAG.CTT      | 13 | 172054849 | 172054864 | 5.33333 | .                  | .      | intergenic | .      | .             | 2 |
| AAAAAT.ATTTT | 13 | 172085437 | 172085460 | 4       | .                  | .      | intergenic | .      | rs787891574   | 2 |
| AT.AT        | 13 | 172086787 | 172086797 | 5.5     | .                  | .      | intergenic | .      | 375525 rs7909 | 2 |
| AG.CT        | 13 | 172117459 | 172117477 | 9.5     | .                  | .      | intergenic | .      | 119068 rs7936 | 2 |
| AAAAG.CTTTT  | 13 | 172169401 | 172169419 | 3.8     | .                  | .      | intergenic | .      | rs792176964   | 2 |
| AT.AT        | 13 | 172330565 | 172330574 | 5       | .                  | .      | intergenic | .      | .             | 2 |
| AAT.ATT      | 13 | 172585699 | 172585719 | 7       | .                  | .      | intergenic | .      | rs791397198   | 2 |
| AAACC.GGTTT  | 13 | 172589411 | 172589433 | 4.6     | .                  | .      | intergenic | .      | rs791807898   | 2 |
| AAAT.ATTT    | 13 | 172600913 | 172600936 | 6       | .                  | .      | intergenic | .      | rs787390909   | 2 |
| AAAC.GTTT    | 13 | 172987201 | 172987223 | 5.75    | .                  | .      | intergenic | .      | rs790743569   | 2 |
| AAAT.ATTT    | 13 | 173111418 | 173111437 | 5       | .                  | .      | intergenic | -0.103 | .             | 2 |
| AAAC.GTTT    | 13 | 173397982 | 173398004 | 5.75    | .                  | .      | intergenic | -0.035 | rs790118779   | 2 |
| AG.CT        | 13 | 173439583 | 173439594 | 6       | .                  | .      | intergenic | -0.207 | .             | 2 |
| AAAG.CTTT    | 13 | 173610590 | 173610608 | 4.75    | .                  | .      | intergenic | .      | rs790215600   | 2 |
| AC.GT        | 13 | 173613279 | 173613288 | 5       | .                  | .      | intergenic | .      | .             | 2 |
| AT.AT        | 13 | 173725002 | 173725016 | 7.5     | .                  | .      | intergenic | 0.172  | 307137 rs7915 | 2 |
| AG.CT        | 13 | 173956726 | 173956746 | 10.5    | .                  | .      | intergenic | 0.041  | 346186 rs7872 | 2 |
| AAC.GTT      | 13 | 174067340 | 174067353 | 4.66667 | .                  | .      | intergenic | .      | rs792439866   | 3 |
| AAAAC.GTTTT  | 13 | 174079262 | 174079286 | 5       | .                  | .      | intergenic | .      | 320788 rs7933 | 2 |
| AT.AT        | 13 | 174176462 | 174176476 | 7.5     | .                  | .      | intergenic | 0.003  | .             | 4 |
| AT.AT        | 13 | 174328263 | 174328276 | 7       | .                  | .      | intergenic | .      | rs786853853   | 2 |
| AC.GT        | 13 | 174421629 | 174421651 | 11.5    | .                  | .      | intergenic | 0.081  | rs789992706   | 2 |
| AAAAT.ATTTT  | 13 | 174593187 | 174593205 | 3.8     | .                  | .      | intergenic | .      | rs788374711   | 2 |
| AAGC.GCTT    | 13 | 174788714 | 174788734 | 5.25    | .                  | .      | intergenic | .      | rs791433753   | 3 |
| AC.GT        | 13 | 174796616 | 174796628 | 6.5     | .                  | .      | intergenic | 0.205  | .             | 2 |
| AAAG.CTTT    | 13 | 175020246 | 175020264 | 4.75    | .                  | .      | intergenic | -0.42  | .             | 3 |
| AC.GT        | 13 | 175027241 | 175027252 | 6       | .                  | .      | intergenic | .      | .             | 3 |
| AC.GT        | 13 | 175086213 | 175086253 | 20.5    | .                  | .      | intergenic | .      | rs788968407   | 2 |
| AG.CT        | 13 | 175324466 | 175324476 | 5.5     | .                  | .      | intergenic | .      | .             | 2 |
| AG.CT        | 13 | 175368524 | 175368543 | 10      | .                  | .      | intergenic | .      | 128681 rs7929 | 2 |
| AAT.ATT      | 13 | 175537984 | 175538001 | 6       | .                  | .      | intergenic | 0.031  | .             | 2 |
| AAAT.ATTT    | 13 | 175543232 | 175543253 | 5.5     | .                  | .      | intergenic | 0.273  | rs787988287   | 2 |
| AC.GT        | 13 | 175580072 | 175580081 | 5       | .                  | .      | intergenic | .      | rs787491961   | 3 |
| AC.GT        | 13 | 175832274 | 175832289 | 8       | .                  | .      | intergenic | 0.004  | rs786965035   | 4 |
| AATG.CATT    | 13 | 176089746 | 176089775 | 7.5     | .                  | .      | intergenic | -0.111 | rs788386163   | 2 |
| AT.AT        | 13 | 176704777 | 176704791 | 7.5     | .                  | .      | intergenic | 0.125  | .             | 4 |
| AAAC.GTTT    | 13 | 176785169 | 176785183 | 3.75    | .                  | .      | intergenic | -0.007 | 144121 rs7864 | 2 |
| AT.AT        | 13 | 177398847 | 177398858 | 6       | .                  | .      | intergenic | -0.05  | rs790870880   | 2 |
| AACT.AGTT    | 13 | 177509216 | 177509230 | 3.75    | ENSSSCT00000022760 | EPHA3  | intron     | -0.061 | rs788167573   | 2 |
| AAAC.GTTT    | 13 | 177700784 | 177700805 | 5.5     | ENSSSCT00000022760 | EPHA3  | intron     | .      | 395078 rs7908 | 2 |
| AC.GT        | 13 | 177737271 | 177737286 | 8       | ENSSSCT00000022760 | EPHA3  | intron     | 0.015  | .             | 2 |
| AAAAC.GTTTT  | 13 | 178092405 | 178092427 | 4.6     | .                  | .      | intergenic | -0.047 | rs793032312   | 2 |
| ACAT.ATGT    | 13 | 178349598 | 178349617 | 5       | .                  | .      | intergenic | .      | rs793573974   | 2 |
| AAAT.ATTT    | 13 | 178354087 | 178354106 | 5       | .                  | .      | intergenic | 0.664  | rs789947326   | 2 |
| AT.AT        | 13 | 178820371 | 178820394 | 12      | .                  | .      | intergenic | 0.173  | rs788370904   | 2 |
| AT.AT        | 13 | 179313362 | 179313371 | 5       | .                  | .      | intergenic | .      | .             | 3 |
| AAAC.GTTT    | 13 | 180017939 | 180017969 | 7.75    | .                  | .      | intergenic | 0.1    | rs787412785   | 2 |
| AATT.AATT    | 13 | 180029841 | 180029858 | 4.5     | .                  | .      | intergenic | .      | rs791901012   | 2 |
| AAAC.GTTT    | 13 | 180137870 | 180137892 | 5.75    | .                  | .      | intergenic | 0.015  | rs791300628   | 2 |
| AAAC.GTTT    | 13 | 180269532 | 180269563 | 8       | .                  | .      | intergenic | 0.01   | rs793195554   | 2 |
| AG.CT        | 13 | 180280587 | 180280602 | 8       | .                  | .      | intergenic | 0.359  | 779359 rs7880 | 2 |
| AAGG.CCTT    | 13 | 180320261 | 180320277 | 4.25    | .                  | .      | intergenic | -0.118 | 364231 rs7866 | 2 |
| AC.GT        | 13 | 180385452 | 180385468 | 8.5     | .                  | .      | intergenic | -0.102 | rs786902806   | 2 |
| AG.CT        | 13 | 180419076 | 180419098 | 11.5    | .                  | .      | intergenic | -0.043 | rs792869260   | 2 |

|              |    |           |           |         |                    |        |            |        |               |   |
|--------------|----|-----------|-----------|---------|--------------------|--------|------------|--------|---------------|---|
| AC.GT        | 13 | 180663171 | 180663204 | 17      | .                  | .      | intergenic | 0.273  | .             | 2 |
| AT.AT        | 13 | 180903079 | 180903089 | 5.5     | ENSSSCT00000013130 | CADM2  | intron     | -0.257 | rs786543319   | 2 |
| AC.GT        | 13 | 180908583 | 180908594 | 6       | ENSSSCT00000013130 | CADM2  | intron     | 0.004  | rs788824551   | 2 |
| AAAAT.ATTTT  | 13 | 181204815 | 181204842 | 5.6     | .                  | .      | intergenic | -0.242 | rs787771507   | 2 |
| ACC.GGT      | 13 | 181707449 | 181707461 | 4.33333 | .                  | .      | intergenic | -0.053 | .             | 2 |
| AC.GT        | 13 | 181832325 | 181832338 | 7       | .                  | .      | intergenic | .      | .             | 2 |
| AC.GT        | 13 | 181922151 | 181922163 | 6.5     | .                  | .      | intergenic | .      | rs793740087   | 3 |
| AT.AT        | 13 | 181942523 | 181942539 | 8.5     | .                  | .      | intergenic | .      | .             | 4 |
| AAAC.GTTT    | 13 | 182363857 | 182363879 | 5.75    | .                  | .      | intergenic | .      | 326086 rs7871 | 2 |
| AC.GT        | 13 | 182600228 | 182600247 | 10      | .                  | .      | intergenic | .      | .             | 4 |
| AATG.CATT    | 13 | 182777057 | 182777083 | 6.75    | .                  | .      | intergenic | 0.017  | rs787425028   | 2 |
| AAAT.ATTT    | 13 | 182811126 | 182811141 | 4       | .                  | .      | intergenic | .      | rs787889767   | 2 |
| AAAC.GTTT    | 13 | 182849847 | 182849861 | 3.75    | .                  | .      | intergenic | -0.085 | 20475 rs7902  | 4 |
| AC.GT        | 13 | 183036252 | 183036264 | 6.5     | .                  | .      | intergenic | -0.066 | .             | 3 |
| AC.GT        | 13 | 183036540 | 183036550 | 5.5     | .                  | .      | intergenic | -0.24  | rs791853220   | 5 |
| ATC.GAT      | 13 | 183077980 | 183078001 | 7.33333 | .                  | .      | intergenic | .      | rs792575305   | 2 |
| AAAT.ATTT    | 13 | 183105168 | 183105182 | 3.75    | .                  | .      | intergenic | 0.268  | rs787801344   | 2 |
| AT.AT        | 13 | 183218057 | 183218077 | 10.5    | .                  | .      | intergenic | .      | rs789143462   | 2 |
| AC.GT        | 13 | 183368374 | 183368400 | 13.5    | .                  | .      | intergenic | .      | rs787270395   | 2 |
| AAAT.ATTT    | 13 | 183799448 | 183799475 | 7       | .                  | .      | intergenic | 0.834  | rs786996946   | 2 |
| AAT.ATT      | 13 | 183821078 | 183821093 | 5.33333 | .                  | .      | intergenic | 0.032  | rs788416194   | 2 |
| AT.AT        | 13 | 183838534 | 183838545 | 6       | ENSSSCT00000024901 | .      | intron     | .      | rs788864876   | 2 |
| AT.AT        | 13 | 184222968 | 184222978 | 5.5     | ENSSSCT00000031865 | .      | intron     | 0.141  | rs790648650   | 2 |
| AT.AT        | 13 | 184283269 | 184283281 | 6.5     | .                  | .      | intergenic | 0.417  | rs788649801   | 2 |
| AT.AT        | 13 | 184290050 | 184290073 | 12      | .                  | .      | intergenic | 0.056  | rs793240004   | 2 |
| AT.AT        | 13 | 184353022 | 184353049 | 14      | .                  | .      | intergenic | .      | rs791978160   | 3 |
| AT.AT        | 13 | 184482449 | 184482468 | 10      | .                  | .      | intergenic | -0.084 | .             | 3 |
| AGGG.CCCT    | 13 | 184506333 | 184506346 | 3.5     | .                  | .      | intergenic | -0.097 | rs788296666   | 2 |
| AAC.GTT      | 13 | 185268220 | 185268241 | 7.33333 | .                  | .      | intergenic | -0.009 | .             | 2 |
| AT.AT        | 13 | 185465502 | 185465511 | 5       | .                  | .      | intergenic | -0.116 | rs791772427   | 4 |
| AAC.GTT      | 13 | 185653203 | 185653219 | 5.66667 | .                  | .      | intergenic | -0.059 | 326994 rs7904 | 2 |
| AAAAAT.ATTTT | 13 | 185682341 | 185682373 | 5.5     | .                  | .      | intergenic | 0.054  | rs791340111   | 2 |
| AC.GT        | 13 | 185722995 | 185723007 | 6.5     | .                  | .      | intergenic | .      | rs787289738   | 4 |
| AAC.GTT      | 13 | 185819861 | 185819874 | 4.66667 | .                  | .      | intergenic | -0.054 | .             | 2 |
| AAAT.ATTT    | 13 | 185917490 | 185917501 | 3       | .                  | .      | intergenic | 0.026  | rs791274622   | 2 |
| AAAT.ATTT    | 13 | 185939521 | 185939535 | 3.75    | .                  | .      | intergenic | -0.121 | rs787117823   | 2 |
| AC.GT        | 13 | 186006330 | 186006346 | 8.5     | .                  | .      | intergenic | .      | 307256 rs7893 | 2 |
| AAAC.GTTT    | 13 | 186064544 | 186064562 | 4.75    | .                  | .      | intergenic | -0.095 | 304833 rs7906 | 2 |
| AG.CT        | 13 | 186232457 | 186232472 | 8       | .                  | .      | intergenic | .      | .             | 4 |
| AC.GT        | 13 | 186316281 | 186316300 | 10      | .                  | .      | intergenic | 0.104  | rs786853194   | 2 |
| AAAAC.GTTTT  | 13 | 186452254 | 186452274 | 3.5     | .                  | .      | intergenic | 0.008  | rs786645395   | 2 |
| AG.CT        | 13 | 186637551 | 186637560 | 5       | ENSSSCT00000013132 | .      | intron     | -0.102 | .             | 3 |
| AAAAC.GTTTT  | 13 | 186638095 | 186638132 | 6.33333 | ENSSSCT00000013132 | .      | intron     | .      | rs792286979   | 2 |
| AAAG.CTTT    | 13 | 186643327 | 186643350 | 6       | ENSSSCT00000013132 | .      | intron     | -0.271 | 145745 rs7886 | 2 |
| AGG.CCT      | 13 | 186715826 | 186715842 | 5.66667 | ENSSSCT00000013132 | .      | intron     | 0.223  | rs787835464   | 2 |
| AAC.GTT      | 13 | 186767983 | 186768014 | 10.6667 | ENSSSCT00000013132 | .      | intron     | 0.153  | 304951 rs7897 | 2 |
| AT.AT        | 13 | 186804229 | 186804240 | 6       | ENSSSCT00000013132 | .      | intron     | -0.006 | rs793489650   | 3 |
| AT.AT        | 13 | 186957102 | 186957117 | 8       | .                  | .      | intergenic | -0.12  | .             | 2 |
| AT.AT        | 13 | 187005368 | 187005387 | 10      | .                  | .      | intergenic | .      | rs787571072   | 2 |
| AC.GT        | 13 | 187063117 | 187063132 | 8       | .                  | .      | intergenic | 0.461  | 105705 rs7937 | 2 |
| AC.GT        | 13 | 187120459 | 187120471 | 6.5     | .                  | .      | intergenic | 0.002  | .             | 4 |
| AAAAC.GTTTT  | 13 | 187130860 | 187130880 | 4.2     | .                  | .      | intergenic | 0.505  | rs789856921   | 2 |
| AAAT.ATTT    | 13 | 187194932 | 187194963 | 8       | .                  | .      | intergenic | 0.58   | 278228 rs7872 | 2 |
| ACC.GGT      | 13 | 187517857 | 187517879 | 7.66667 | .                  | .      | intergenic | .      | rs788239117   | 2 |
| ACT.AGT      | 13 | 187518006 | 187518020 | 5       | .                  | .      | intergenic | .      | .             | 2 |
| AT.AT        | 13 | 187630196 | 187630221 | 13      | .                  | .      | intergenic | -0.058 | .             | 2 |
| AC.GT        | 13 | 187868628 | 187868640 | 6.5     | .                  | .      | intergenic | 0.045  | .             | 4 |
| AAAC.GTTT    | 13 | 187956200 | 187956222 | 5.75    | .                  | .      | intergenic | -0.055 | 363464 rs7915 | 2 |
| AT.AT        | 13 | 188092742 | 188092751 | 5       | .                  | .      | intergenic | 0.261  | .             | 2 |
| AAAT.ATTT    | 13 | 188185701 | 188185716 | 4       | .                  | .      | intergenic | 0.106  | 396992 rs7888 | 2 |
| AAAC.GTTT    | 13 | 188408283 | 188408309 | 6.75    | .                  | .      | intergenic | 0.165  | 349785 rs7913 | 2 |
| AAAC.GTTT    | 13 | 188455871 | 188455896 | 6.5     | .                  | .      | intergenic | -0.06  | rs787546872   | 2 |
| AAAT.ATTT    | 13 | 188677960 | 188677976 | 4.25    | .                  | .      | intergenic | 0.17   | 281382 rs7902 | 2 |
| AAC.GTT      | 13 | 188690428 | 188690444 | 5.66667 | .                  | .      | intergenic | 0.099  | rs786901222   | 3 |
| AC.GT        | 13 | 188691157 | 188691166 | 5       | .                  | .      | intergenic | -0.023 | .             | 4 |
| AATG.CATT    | 13 | 188695629 | 188695646 | 4.5     | .                  | .      | intergenic | -0.172 | 755616 rs7889 | 2 |
| AAAAG.CTTTT  | 13 | 188718612 | 188718630 | 3.8     | .                  | .      | intergenic | .      | 375903 rs7905 | 2 |
| AAAAT.ATTTT  | 13 | 188787949 | 188787979 | 6.2     | .                  | .      | intergenic | 0.051  | 339512 rs7875 | 2 |
| AC.GT        | 13 | 188803175 | 188803194 | 10      | .                  | .      | intergenic | -0.127 | .             | 4 |
| AC.GT        | 13 | 188908058 | 188908068 | 5.5     | .                  | .      | intergenic | -0.107 | rs789499107   | 2 |
| AC.GT        | 13 | 188952346 | 188952356 | 5.5     | .                  | .      | intergenic | -0.212 | rs786410731   | 2 |
| AG.CT        | 13 | 189021291 | 189021300 | 5       | .                  | .      | intergenic | -0.014 | rs788455001   | 2 |
| AC.GT        | 13 | 189265792 | 189265803 | 6       | .                  | .      | intergenic | .      | rs786333872   | 2 |
| AAAT.ATTT    | 13 | 189305517 | 189305536 | 5       | .                  | .      | intergenic | .      | rs793119984   | 2 |
| AT.AT        | 13 | 189376683 | 189376701 | 9.5     | ENSSSCT00000013136 | .      | intron     | 0.533  | .             | 2 |
| AAAT.ATTT    | 13 | 189529890 | 189529913 | 6       | ENSSSCT00000013137 | .      | intron     | 0.062  | 178839 rs7880 | 2 |
| AC.GT        | 13 | 189710263 | 189710282 | 10      | ENSSSCT00000013139 | SAMSN1 | intron     | 0.539  | rs792869020   | 3 |
| AC.GT        | 13 | 189750950 | 189750972 | 11.5    | .                  | .      | intergenic | 0.101  | 357129 rs7921 | 2 |
| AG.CT        | 13 | 189758305 | 189758319 | 7.5     | .                  | .      | intergenic | 0.034  | 358699 rs7915 | 2 |
| AG.CT        | 13 | 190000518 | 190000528 | 5.5     | .                  | .      | intergenic | 0.05   | rs786946961   | 4 |
| AT.AT        | 13 | 190389953 | 190389962 | 5       | .                  | .      | intergenic | 0.603  | rs790968432   | 2 |
| AT.AT        | 13 | 190429103 | 190429117 | 7.5     | .                  | .      | intergenic | 0.095  | .             | 2 |
| AAGG.CCTT    | 13 | 190497012 | 190497047 | 9       | .                  | .      | intergenic | -0.044 | 362714 rs7900 | 2 |
| AT.AT        | 13 | 190503808 | 190503819 | 6       | .                  | .      | intergenic | .      | rs787924237   | 2 |

|              |    |           |           |         |                    |         |            |        |               |   |
|--------------|----|-----------|-----------|---------|--------------------|---------|------------|--------|---------------|---|
| AAAT.ATTT    | 13 | 190584657 | 190584673 | 4.25    | .                  | .       | intergenic | -0.077 | rs791717364   | 2 |
| AC.GT        | 13 | 190673038 | 190673048 | 5.5     | .                  | .       | intergenic | -0.024 | rs789356326   | 2 |
| AAC.GTT      | 13 | 190784126 | 190784139 | 4.66667 | .                  | .       | intergenic | 0.138  | 365959 rs7927 | 2 |
| AC.GT        | 13 | 190940456 | 190940466 | 5.5     | ENSSSCT00000022689 | USP25   | intron     | -0.006 | rs790287437   | 3 |
| AC.GT        | 13 | 190940456 | 190940466 | 5.5     | ENSSSCT00000027672 | USP25   | intron     | -0.006 | rs790287437   | 3 |
| AAG.CTT      | 13 | 191111954 | 191111970 | 5.66667 | .                  | .       | intergenic | .      | rs793778958   | 2 |
| AAAG.CTTT    | 13 | 191135786 | 191135802 | 4.25    | .                  | .       | intergenic | 0.092  | rs790141548   | 2 |
| AAAAT.ATTTT  | 13 | 191215604 | 191215618 | 3       | .                  | .       | intergenic | 0.168  | rs789476969   | 2 |
| AAC.GTT      | 13 | 191311224 | 191311237 | 4.66667 | .                  | .       | intergenic | 1.913  | rs792272271   | 4 |
| AAAC.GTTT    | 13 | 191456023 | 191456044 | 5.5     | .                  | .       | intergenic | -0.021 | rs787888337   | 2 |
| AAC.GTT      | 13 | 191485310 | 191485330 | 7       | .                  | .       | intergenic | 0.173  | rs788616681   | 2 |
| AC.GT        | 13 | 191704124 | 191704134 | 5.5     | .                  | .       | intergenic | 0.038  | .             | 2 |
| AG.CT        | 13 | 191704770 | 191704790 | 10.5    | .                  | .       | intergenic | .      | rs787993722   | 6 |
| AAC.GTT      | 13 | 192191520 | 192191534 | 5       | .                  | .       | intergenic | .      | rs700207044   | 5 |
| AAT.ATT      | 13 | 192232476 | 192232498 | 7.66667 | .                  | .       | intergenic | .      | 341077 rs7918 | 4 |
| AAAC.GTTT    | 13 | 192443773 | 192443785 | 3.25    | .                  | .       | intergenic | .      | rs789897803   | 2 |
| AT.AT        | 13 | 192721722 | 192721731 | 5       | .                  | .       | intergenic | 0.128  | rs792425644   | 3 |
| AAAG.CTTT    | 13 | 193447154 | 193447184 | 7.75    | .                  | .       | intergenic | 0.053  | rs791420001   | 2 |
| AAAAC.GTTTT  | 13 | 193826089 | 193826112 | 4.8     | .                  | .       | intergenic | 0.05   | 253225 rs7908 | 2 |
| AC.GT        | 13 | 193835521 | 193835546 | 13      | .                  | .       | intergenic | .      | rs787890387   | 3 |
| AAG.CTT      | 13 | 193900001 | 193900016 | 5.33333 | .                  | .       | intergenic | 0.532  | .             | 2 |
| AAC.GTT      | 13 | 193948385 | 193948398 | 4.66667 | .                  | .       | intergenic | -0.228 | rs787181926   | 2 |
| AG.CT        | 13 | 194009399 | 194009413 | 7.5     | .                  | .       | intergenic | -0.023 | rs791459050   | 3 |
| AT.AT        | 13 | 194324615 | 194324631 | 8.5     | .                  | .       | intergenic | 0.137  | rs793588797   | 2 |
| AAAAC.GTTTT  | 13 | 194637270 | 194637288 | 3.8     | .                  | .       | intergenic | 0.075  | rs791091127   | 2 |
| AC.GT        | 13 | 194693330 | 194693343 | 7       | .                  | .       | intergenic | -0.094 | 732209 rs7890 | 2 |
| AAT.ATT      | 13 | 194784637 | 194784649 | 4.33333 | .                  | .       | intergenic | -0.037 | rs786525791   | 2 |
| AAAC.GTTT    | 13 | 194806327 | 194806345 | 4.75    | .                  | .       | intergenic | 0.185  | rs791412263   | 2 |
| AAT.ATT      | 13 | 194820470 | 194820504 | 11.6667 | .                  | .       | intergenic | 0.063  | rs793093181   | 2 |
| AT.AT        | 13 | 194958050 | 194958059 | 5       | .                  | .       | intergenic | 0.072  | .             | 4 |
| AC.GT        | 13 | 194981890 | 194981902 | 6.5     | .                  | .       | intergenic | -0.023 | rs786813782   | 3 |
| AC.GT        | 13 | 195248468 | 195248478 | 5.5     | .                  | .       | intergenic | -0.139 | rs790762832   | 3 |
| AAAC.GTTT    | 13 | 195406707 | 195406727 | 5.25    | ENSSSCT00000013151 | .       | intron     | 0.025  | rs788320697   | 2 |
| AATC.GATT    | 13 | 195415639 | 195415660 | 5.5     | ENSSSCT00000013151 | .       | intron     | 0.252  | 141903 rs7925 | 2 |
| AAT.ATT      | 13 | 195597064 | 195597085 | 7.33333 | .                  | .       | intergenic | 0.047  | rs792666218   | 2 |
| AAC.GTT      | 13 | 195632254 | 195632281 | 9.33333 | .                  | .       | intergenic | -0.111 | rs787739408   | 2 |
| AAC.GTT      | 13 | 195799932 | 195799948 | 5.66667 | .                  | .       | intergenic | 0.091  | 148260 rs7921 | 2 |
| AC.GT        | 13 | 196002250 | 196002273 | 12      | .                  | .       | intergenic | 0.14   | .             | 2 |
| AAAAC.GTTTT  | 13 | 196146120 | 196146144 | 4.16667 | .                  | .       | intergenic | .      | rs789152540   | 2 |
| AG.CT        | 13 | 196245121 | 196245132 | 6       | .                  | .       | intergenic | -0.058 | .             | 2 |
| AT.AT        | 13 | 196304031 | 196304058 | 14      | .                  | .       | intergenic | .      | rs789851275   | 2 |
| AAAC.GTTT    | 13 | 196305223 | 196305234 | 3       | .                  | .       | intergenic | 0.063  | rs790755632   | 2 |
| AAAT.ATTT    | 13 | 196320746 | 196320758 | 3.25    | .                  | .       | intergenic | 0.089  | rs792436606   | 2 |
| AGGAG.CTCCT  | 13 | 196465850 | 196465878 | 4.83333 | .                  | .       | intergenic | .      | rs786407122   | 2 |
| AT.AT        | 13 | 196574569 | 196574579 | 5.5     | .                  | .       | intergenic | -0.082 | rs787038350   | 2 |
| AT.AT        | 13 | 196746481 | 196746492 | 6       | .                  | .       | intergenic | -0.161 | 240159 rs7868 | 2 |
| AAAC.GTTT    | 13 | 196966995 | 196967009 | 3.75    | .                  | .       | intergenic | -0.034 | rs791415801   | 2 |
| AT.AT        | 13 | 196982628 | 196982638 | 5.5     | .                  | .       | intergenic | .      | rs793398620   | 3 |
| AAC.GTT      | 13 | 197195550 | 197195561 | 4       | .                  | .       | intergenic | .      | rs788973873   | 3 |
| AAC.GTT      | 13 | 197235143 | 197235156 | 4.66667 | .                  | .       | intergenic | .      | .             | 2 |
| AG.CT        | 13 | 197603757 | 197603769 | 6.5     | .                  | .       | intergenic | -0.312 | rs786705444   | 3 |
| AAAT.ATTT    | 13 | 197680317 | 197680347 | 7.75    | .                  | .       | intergenic | -0.2   | rs786292750   | 2 |
| AC.GT        | 13 | 197729230 | 197729242 | 6.5     | .                  | .       | intergenic | .      | rs793810963   | 3 |
| AAAT.ATTT    | 13 | 197844661 | 197844686 | 6.5     | .                  | .       | intergenic | .      | .             | 2 |
| AC.GT        | 13 | 198163399 | 198163410 | 6       | .                  | .       | intergenic | -0.105 | .             | 3 |
| AG.CT        | 13 | 198397962 | 198397974 | 6.5     | .                  | .       | intergenic | 0.097  | rs789371945   | 2 |
| ACACC.GGTGT  | 13 | 198437969 | 198437991 | 4.6     | .                  | .       | intergenic | -0.058 | 208068 rs7863 | 2 |
| AAAC.GTTT    | 13 | 198656597 | 198656623 | 6.75    | .                  | .       | intergenic | 0.095  | rs790791967   | 2 |
| AG.CT        | 13 | 198733550 | 198733559 | 5       | .                  | .       | intergenic | -0.046 | .             | 2 |
| AG.CT        | 13 | 198960852 | 198960864 | 6.5     | .                  | .       | intergenic | .      | rs791948569   | 2 |
| AC.GT        | 13 | 199060709 | 199060718 | 5       | .                  | .       | intergenic | .      | .             | 3 |
| AC.GT        | 13 | 199061623 | 199061641 | 9.5     | .                  | .       | intergenic | .      | 104104 rs7929 | 3 |
| AG.CT        | 13 | 199081571 | 199081581 | 5.5     | .                  | .       | intergenic | 0.209  | 368658 rs7915 | 2 |
| AAAT.ATTT    | 13 | 199160277 | 199160299 | 5.75    | ENSSSCT00000024945 | JAM2    | intron     | .      | rs788922203   | 2 |
| AAAT.ATTT    | 13 | 199160277 | 199160299 | 5.75    | ENSSSCT00000023520 | JAM2    | intron     | .      | rs788922203   | 2 |
| AAT.ATT      | 13 | 199293529 | 199293542 | 4.66667 | ENSSSCT00000013154 | APP     | intron     | -0.055 | 101061 rs7935 | 2 |
| AAT.ATT      | 13 | 199293529 | 199293542 | 4.66667 | ENSSSCT00000013153 | APP     | intron     | -0.055 | 101061 rs7935 | 2 |
| AC.GT        | 13 | 199341044 | 199341065 | 11      | ENSSSCT00000013154 | APP     | intron     | 0.259  | .             | 5 |
| AC.GT        | 13 | 199341044 | 199341065 | 11      | ENSSSCT00000013153 | APP     | intron     | 0.259  | .             | 5 |
| AC.GT        | 13 | 199462061 | 199462076 | 8       | ENSSSCT00000013154 | APP     | intron     | .      | .             | 2 |
| AC.GT        | 13 | 199462061 | 199462076 | 8       | ENSSSCT00000013153 | APP     | intron     | .      | .             | 2 |
| AAAC.GTTT    | 13 | 199578943 | 199578957 | 3.75    | .                  | .       | intergenic | 0.02   | rs788087639   | 2 |
| ACATAT.ATATG | 13 | 199583909 | 199583928 | 3.33333 | .                  | .       | intergenic | .      | rs786708689   | 2 |
| AAC.GTT      | 13 | 199708897 | 199708913 | 5.66667 | .                  | .       | intergenic | 0.071  | rs791922989   | 2 |
| AG.CT        | 13 | 199778956 | 199778968 | 6.5     | .                  | .       | intergenic | 0.09   | rs791652846   | 2 |
| AAAT.ATTT    | 13 | 199935182 | 199935200 | 4.75    | .                  | .       | intergenic | 0.058  | rs788779893   | 4 |
| AG.CT        | 13 | 200383482 | 200383491 | 5       | .                  | .       | intergenic | 0.315  | rs786883431   | 4 |
| AC.GT        | 13 | 200396760 | 200396770 | 5.5     | .                  | .       | intergenic | 0.113  | rs791556412   | 2 |
| AAAC.GTTT    | 13 | 200421551 | 200421573 | 5.75    | ENSSSCT00000013159 | ADAMTS5 | intron     | -0.095 | 104227 rs7887 | 5 |
| AT.AT        | 13 | 200495344 | 200495362 | 9.5     | .                  | .       | intergenic | -0.025 | .             | 4 |
| AC.GT        | 13 | 200523610 | 200523626 | 8.5     | .                  | .       | intergenic | .      | .             | 2 |
| AG.CT        | 13 | 200538067 | 200538076 | 5       | .                  | .       | intergenic | -0.022 | rs791242765   | 2 |
| AAC.GTT      | 13 | 200618448 | 200618460 | 4.33333 | .                  | .       | intergenic | 0.032  | rs788010440   | 2 |
| AAAT.ATTT    | 13 | 200838629 | 200838647 | 4.75    | .                  | .       | intergenic | -0.18  | rs793553889   | 2 |

|               |    |           |           |         |                    |        |            |        |               |   |
|---------------|----|-----------|-----------|---------|--------------------|--------|------------|--------|---------------|---|
| AT.AT         | 13 | 201031400 | 201031409 | 5       | .                  | .      | intergenic | -0.085 | .             | 2 |
| AAAT.ATTT     | 13 | 201109699 | 201109731 | 8.25    | .                  | .      | intergenic | .      | rs786582733   | 2 |
| AT.AT         | 13 | 201113579 | 201113603 | 12.5    | .                  | .      | intergenic | -0.154 | .             | 4 |
| AAAC.GTTT     | 13 | 201165716 | 201165727 | 3       | .                  | .      | intergenic | -0.171 | rs787155108   | 2 |
| AT.AT         | 13 | 201313985 | 201313998 | 7       | .                  | .      | intergenic | 0.026  | .             | 2 |
| AAAC.GTTT     | 13 | 201329519 | 201329537 | 4.75    | .                  | .      | intergenic | .      | 79034 rs7900  | 2 |
| AT.AT         | 13 | 201336149 | 201336160 | 6       | .                  | .      | intergenic | 0.036  | 181791 rs7881 | 2 |
| AC.GT         | 13 | 201347467 | 201347488 | 11      | .                  | .      | intergenic | 0.212  | 336113 rs7902 | 4 |
| AAC.GTT       | 13 | 201589868 | 201589887 | 6.66667 | .                  | .      | intergenic | 0.12   | rs792082553   | 2 |
| AAAC.GTTT     | 13 | 201592872 | 201592888 | 4.25    | .                  | .      | intergenic | .      | rs789383768   | 2 |
| AT.AT         | 13 | 201628048 | 201628065 | 9       | .                  | .      | intergenic | 0.037  | 358266 rs6929 | 2 |
| AAAG.CTTT     | 13 | 201716303 | 201716327 | 6.25    | .                  | .      | intergenic | -0.041 | .             | 2 |
| AAAAC.GTTTT   | 13 | 201865237 | 201865256 | 4       | .                  | .      | intergenic | -0.127 | rs787725045   | 2 |
| AAAG.CTTT     | 13 | 201903525 | 201903539 | 3.75    | .                  | .      | intergenic | -0.009 | rs791460764   | 2 |
| AC.GT         | 13 | 202182805 | 202182814 | 5       | .                  | .      | intergenic | 0.2    | .             | 2 |
| AAAC.GTTT     | 13 | 202191391 | 202191406 | 4       | .                  | .      | intergenic | .      | 739831 rs7921 | 2 |
| AAAT.ATTT     | 13 | 202248909 | 202248936 | 7       | .                  | .      | intergenic | -0.056 | rs788091367   | 2 |
| AT.AT         | 13 | 202274814 | 202274828 | 7.5     | .                  | .      | intergenic | 0.116  | .             | 2 |
| AAAT.ATTT     | 13 | 202492783 | 202492800 | 4.5     | .                  | .      | intergenic | .      | 249906 rs7894 | 2 |
| AAT.ATT       | 13 | 202515507 | 202515520 | 4.66667 | .                  | .      | intergenic | .      | .             | 2 |
| AAAC.GTTT     | 13 | 202594350 | 202594368 | 4.75    | .                  | .      | intergenic | .      | 206142 rs7881 | 2 |
| AAAG.CTTT     | 13 | 202795869 | 202795885 | 4.25    | .                  | .      | intergenic | .      | rs788349071   | 2 |
| AC.GT         | 13 | 203056723 | 203056732 | 5       | .                  | .      | intergenic | -0.045 | rs786428414   | 2 |
| AT.AT         | 13 | 203074622 | 203074633 | 6       | .                  | .      | intergenic | 0.212  | 319799 rs7884 | 2 |
| AAC.GTT       | 13 | 203421784 | 203421799 | 5.33333 | ENSSSCT00000028121 | GRIK1  | intron     | -0.173 | rs789008871   | 2 |
| AC.GT         | 13 | 203679867 | 203679882 | 8       | .                  | .      | intergenic | -0.105 | 722358 rs7925 | 4 |
| AAC.GTT       | 13 | 203790256 | 203790277 | 7.33333 | .                  | .      | intergenic | 0.054  | rs788447758   | 2 |
| AG.CT         | 13 | 204089632 | 204089646 | 7.5     | .                  | .      | intergenic | -0.017 | rs788205154   | 2 |
| AG.CT         | 13 | 204132804 | 204132825 | 11      | .                  | .      | intergenic | 0.03   | rs789338498   | 2 |
| AAAAAT.ATTTTT | 13 | 204219076 | 204219096 | 3.5     | .                  | .      | intergenic | -0.278 | rs793472911   | 2 |
| AAAAC.GTTTT   | 13 | 204232873 | 204232888 | 3.2     | .                  | .      | intergenic | 0.146  | 144599 rs7912 | 2 |
| AAAAG.CTTTT   | 13 | 204240795 | 204240817 | 4.6     | .                  | .      | intergenic | -0.043 | rs787802660   | 2 |
| AAAC.GTTT     | 13 | 204268035 | 204268061 | 6.75    | .                  | .      | intergenic | -0.063 | .             | 2 |
| AAAC.GTTT     | 13 | 204273839 | 204273873 | 8.75    | .                  | .      | intergenic | -0.152 | 362597 rs7919 | 3 |
| AC.GT         | 13 | 204422172 | 204422182 | 5.5     | .                  | .      | intergenic | -0.177 | rs786996933   | 4 |
| AAC.GTT       | 13 | 204487881 | 204487900 | 6.66667 | .                  | .      | intergenic | .      | 262280 rs7891 | 2 |
| AAAC.GTTT     | 13 | 204526320 | 204526336 | 4.25    | .                  | .      | intergenic | .      | .             | 3 |
| AAAG.CTTT     | 13 | 204883713 | 204883725 | 3.25    | .                  | .      | intergenic | 0.385  | rs786588080   | 2 |
| AAAAC.GTTTT   | 13 | 204949871 | 204949889 | 3.8     | .                  | .      | intergenic | -0.193 | 752954 rs7932 | 2 |
| AATG.CATT     | 13 | 204961716 | 204961738 | 5.75    | .                  | .      | intergenic | -0.01  | 250519 rs7900 | 2 |
| AAAAG.CTTTT   | 13 | 204964003 | 204964032 | 5       | .                  | .      | intergenic | -0.022 | rs786633817   | 2 |
| AAG.CTT       | 13 | 205082796 | 205082813 | 6       | .                  | .      | intergenic | -0.031 | rs792116373   | 2 |
| AC.GT         | 13 | 205138695 | 205138706 | 6       | .                  | .      | intergenic | -0.066 | 379667 rs7864 | 3 |
| AAAAC.GTTTT   | 13 | 205296172 | 205296187 | 3.2     | ENSSSCT00000031132 | TIAM1  | intron     | 0.564  | rs788361589   | 2 |
| AAAAC.GTTTT   | 13 | 205296172 | 205296187 | 3.2     | ENSSSCT00000013166 | TIAM1  | intron     | 0.564  | rs788361589   | 2 |
| AAAG.CTTT     | 13 | 205467442 | 205467464 | 5.75    | .                  | .      | intergenic | 0.199  | 333711 rs7869 | 2 |
| AAAC.GTTT     | 13 | 205763565 | 205763593 | 7.25    | ENSSSCT00000020619 | U6     | promoter   | 0.307  | 333865 rs7878 | 2 |
| AG.CT         | 13 | 206107102 | 206107120 | 9.5     | .                  | .      | intergenic | .      | rs791389258   | 2 |
| AAAG.CTTT     | 13 | 206203995 | 206204013 | 4.75    | .                  | .      | intergenic | .      | rs789128252   | 2 |
| AAG.CTT       | 13 | 206530178 | 206530203 | 8.66667 | .                  | .      | intergenic | -0.118 | rs786669695   | 2 |
| AATC.GATT     | 13 | 206630483 | 206630500 | 4.5     | .                  | .      | intergenic | -0.184 | .             | 2 |
| AG.CT         | 13 | 206631644 | 206631653 | 5       | .                  | .      | intergenic | 0.541  | .             | 2 |
| AC.GT         | 13 | 206781403 | 206781417 | 7.5     | .                  | .      | intergenic | .      | 354738 rs7879 | 2 |
| AT.AT         | 13 | 207022997 | 207023006 | 5       | ENSSSCT00000030581 | CRYZL1 | intron     | 0.148  | rs790470125   | 2 |
| AC.GT         | 13 | 207248334 | 207248346 | 6.5     | ENSSSCT00000027819 | ITSN1  | intron     | .      | .             | 3 |
| AAAG.CTTT     | 13 | 207477130 | 207477161 | 8       | .                  | .      | intergenic | 0.161  | 274108 rs7933 | 2 |
| AAAT.ATTT     | 13 | 207514368 | 207514381 | 3.5     | .                  | .      | intergenic | .      | .             | 2 |
| AAAT.ATTT     | 13 | 207677284 | 207677300 | 4.25    | .                  | .      | intergenic | 0.05   | rs793535537   | 2 |
| AAAG.CTTT     | 13 | 207750034 | 207750050 | 4.25    | .                  | .      | intergenic | 0.043  | rs791612070   | 2 |
| AAAAC.GTTTT   | 13 | 207901674 | 207901700 | 5.4     | .                  | .      | intergenic | 0.128  | 166809 rs7889 | 2 |
| AC.GT         | 13 | 207994317 | 207994328 | 6       | .                  | .      | intergenic | -0.148 | .             | 6 |
| AAC.GTT       | 13 | 208028379 | 208028395 | 5.66667 | .                  | .      | intergenic | 0.058  | rs791968424   | 2 |
| AT.AT         | 13 | 208106886 | 208106896 | 5.5     | ENSSSCT00000029780 | CLIC6  | intron     | -0.1   | .             | 2 |
| AC.GT         | 13 | 208120666 | 208120677 | 6       | ENSSSCT00000029780 | CLIC6  | intron     | -0.422 | rs791441099   | 6 |
| AAAC.GTTT     | 13 | 208191402 | 208191422 | 5.25    | .                  | .      | intergenic | .      | 743090 rs7868 | 4 |
| AC.GT         | 13 | 208251515 | 208251524 | 5       | ENSSSCT00000013183 | RUNX1  | intron     | -0.173 | .             | 2 |
| AC.GT         | 13 | 208427282 | 208427296 | 7.5     | .                  | .      | intergenic | -0.201 | .             | 6 |
| AC.GT         | 13 | 208432676 | 208432692 | 8.5     | .                  | .      | intergenic | 0.307  | rs787994677   | 2 |
| AAC.GTT       | 13 | 208725599 | 208725614 | 5.33333 | .                  | .      | intergenic | 0.031  | .             | 4 |
| AAAT.ATTT     | 13 | 209069656 | 209069682 | 6.75    | .                  | .      | intergenic | .      | .             | 2 |
| AAAT.ATTT     | 13 | 209111459 | 209111482 | 6       | .                  | .      | intergenic | .      | rs791019842   | 2 |
| AT.AT         | 13 | 209219948 | 209219969 | 11      | .                  | .      | intergenic | 1.342  | rs788984758   | 2 |
| AAAG.CTTT     | 13 | 209382692 | 209382721 | 7.5     | .                  | .      | intergenic | 0.351  | .             | 3 |
| AGG.CCT       | 13 | 209459003 | 209459021 | 6.33333 | .                  | .      | intergenic | .      | 276756 rs7880 | 3 |
| AAAAAT.ATTTTT | 13 | 209587413 | 209587445 | 5.5     | .                  | .      | intergenic | .      | rs788175848   | 2 |
| AAAAG.CTTTT   | 13 | 209603207 | 209603229 | 3.83333 | .                  | .      | intergenic | 0.857  | .             | 2 |
| AT.AT         | 13 | 209612569 | 209612581 | 6.5     | .                  | .      | intergenic | -0.013 | 329253 rs7907 | 2 |
| AAAC.GTTT     | 13 | 209851008 | 209851026 | 4.75    | ENSSSCT00000013185 | CBR3   | intron     | 0.032  | 777432 rs7927 | 2 |
| AAAT.ATTT     | 13 | 210092848 | 210092878 | 7.75    | ENSSSCT00000013188 | CHAF1B | intron     | .      | 369543 rs7924 | 2 |
| AAT.ATT       | 13 | 210236980 | 210237003 | 8       | .                  | .      | intergenic | -0.131 | rs786563502   | 2 |
| AC.GT         | 13 | 210306230 | 210306243 | 7       | .                  | .      | intergenic | 0.102  | rs789108495   | 2 |
| AT.AT         | 13 | 210328189 | 210328198 | 5       | .                  | .      | intergenic | .      | 376826 rs7874 | 2 |
| AG.CT         | 13 | 210419903 | 210419935 | 16.5    | .                  | .      | intergenic | 0.005  | rs793792561   | 2 |
| AG.CT         | 13 | 210536423 | 210536441 | 9.5     | ENSSSCT00000013191 | HLCS   | intron     | .      | rs788782271   | 2 |

|              |    |           |           |         |                    |         |            |        |               |   |
|--------------|----|-----------|-----------|---------|--------------------|---------|------------|--------|---------------|---|
| \AAAAC.GTTTT | 13 | 210628052 | 210628077 | 4.33333 | ENSSSCT00000013191 | HLCS    | intron     | .      | rs791400967   | 2 |
| AAAT.ATTT    | 13 | 210632449 | 210632467 | 4.75    | ENSSSCT00000013191 | HLCS    | intron     | 0.198  | rs793386197   | 2 |
| AC.GT        | 13 | 210690573 | 210690588 | 8       | .                  | .       | intergenic | 0.023  | rs793096321   | 2 |
| AAAAC.GTTTT  | 13 | 210785420 | 210785434 | 3       | ENSSSCT00000013194 | .       | intron     | 0.241  | .             | 2 |
| AAAC.GTTT    | 13 | 211089086 | 211089109 | 6       | .                  | .       | intergenic | 0.425  | rs788773152   | 2 |
| AAAT.ATTT    | 13 | 211294470 | 211294491 | 5.5     | .                  | .       | intergenic | -0.155 | rs792464813   | 2 |
| AG.CT        | 13 | 211510958 | 211510968 | 5.5     | .                  | .       | intergenic | 0.052  | .             | 4 |
| AAAAG.CTTTT  | 13 | 211763829 | 211763847 | 3.8     | .                  | .       | intergenic | .      | rs789008293   | 2 |
| AC.GT        | 13 | 211798288 | 211798298 | 5.5     | .                  | .       | intergenic | -0.022 | rs786934131   | 2 |
| ACAG.CTGT    | 13 | 211886647 | 211886661 | 3.75    | .                  | .       | intergenic | -0.236 | .             | 2 |
| AC.GT        | 13 | 212122187 | 212122197 | 5.5     | ENSSSCT00000023594 | ERG     | intron     | 0.026  | .             | 4 |
| AAT.ATT      | 13 | 212140928 | 212140943 | 5.33333 | ENSSSCT00000023594 | ERG     | intron     | -0.017 | rs790747085   | 2 |
| AC.GT        | 13 | 212398252 | 212398263 | 6       | .                  | .       | intergenic | 0.244  | rs791140140   | 3 |
| AC.GT        | 13 | 212466232 | 212466242 | 5.5     | .                  | .       | intergenic | .      | rs787373127   | 2 |
| AG.CT        | 13 | 212474292 | 212474313 | 11      | .                  | .       | intergenic | -0.57  | .             | 2 |
| AGAT.ATCT    | 13 | 212622917 | 212622932 | 4       | .                  | .       | intergenic | -0.061 | rs791883580   | 2 |
| AAC.GTT      | 13 | 213306279 | 213306293 | 5       | ENSSSCT00000029140 | SH3BGR  | intron     | -0.169 | .             | 2 |
| AAC.GTT      | 13 | 213514380 | 213514399 | 6.66667 | .                  | .       | intergenic | .      | rs787682840   | 2 |
| AC.GT        | 13 | 213552501 | 213552510 | 5       | .                  | .       | intergenic | 0.217  | .             | 2 |
| AAAAC.GTTTT  | 13 | 213745621 | 213745650 | 6       | ENSSSCT00000013204 | DSCAM   | intron     | 0.027  | rs788468602   | 2 |
| AC.GT        | 13 | 213969582 | 213969594 | 6.5     | ENSSSCT00000013204 | DSCAM   | intron     | -0.199 | rs791766852   | 2 |
| AAAT.ATTT    | 13 | 214189060 | 214189083 | 6       | .                  | .       | intergenic | -0.117 | rs793643402   | 2 |
| AC.GT        | 13 | 214216783 | 214216801 | 9.5     | .                  | .       | intergenic | 0.065  | rs793807641   | 2 |
| AC.GT        | 13 | 214370798 | 214370825 | 14      | .                  | .       | intergenic | -0.135 | rs713152239   | 3 |
| AG.CT        | 13 | 214440756 | 214440765 | 5       | .                  | .       | intergenic | -0.113 | .             | 3 |
| AT.AT        | 13 | 214560631 | 214560642 | 6       | .                  | .       | intergenic | .      | 306734 rs7884 | 2 |
| AC.GT        | 13 | 214919425 | 214919442 | 9       | .                  | .       | intergenic | -0.054 | .             | 4 |
| GGGGG.CCCCC  | 13 | 214999457 | 214999475 | 3.16667 | ENSSSCT00000034038 | MX1     | intron     | -0.288 | rs791546487   | 2 |
| GGGGG.CCCCC  | 13 | 214999457 | 214999475 | 3.16667 | ENSSSCT00000034940 | MX1     | intron     | -0.288 | rs791546487   | 2 |
| GGGGG.CCCCC  | 13 | 214999457 | 214999475 | 3.16667 | ENSSSCT00000034771 | MX1     | intron     | -0.288 | rs791546487   | 2 |
| GGGGG.CCCCC  | 13 | 214999457 | 214999475 | 3.16667 | ENSSSCT00000013211 | MX1     | intron     | -0.288 | rs791546487   | 2 |
| GGGGG.CCCCC  | 13 | 214999457 | 214999475 | 3.16667 | ENSSSCT00000035557 | MX1     | promoter   | -0.288 | rs791546487   | 2 |
| AG.CT        | 13 | 215023402 | 215023411 | 5       | .                  | .       | intergenic | .      | 356985 rs7871 | 2 |
| AC.GT        | 13 | 215073406 | 215073428 | 11.5    | ENSSSCT00000013208 | FAM3B   | promoter   | .      | 125581 rs7869 | 4 |
| AAAC.GTTT    | 13 | 215246630 | 215246648 | 4.75    | .                  | .       | intergenic | .      | rs790450637   | 2 |
| AC.GT        | 13 | 215474134 | 215474156 | 11.5    | ENSSSCT00000013217 | RIPK4   | intron     | -0.429 | .             | 3 |
| AAC.GTT      | 13 | 215481237 | 215481252 | 5.33333 | .                  | .       | intergenic | .      | rs788724109   | 2 |
| AAAC.GTTT    | 13 | 215486947 | 215486962 | 4       | .                  | .       | intergenic | .      | rs790000996   | 2 |
| AC.GT        | 13 | 216397426 | 216397438 | 6.5     | ENSSSCT00000025792 | PDE9A   | intron     | .      | .             | 2 |
| AAAC.GTTT    | 13 | 216544105 | 216544121 | 4.25    | .                  | .       | intergenic | 0.221  | rs791203542   | 2 |
| ACACC.GGTGT  | 13 | 216636925 | 216636939 | 3       | ENSSSCT00000028037 | RRP1B   | intron     | -0.338 | rs788508458   | 2 |
| AGC.GCT      | 13 | 216744253 | 216744269 | 5.66667 | .                  | .       | intergenic | .      | rs793284669   | 3 |
| AAAAG.CTTTT  | 13 | 217284384 | 217284410 | 5.4     | ENSSSCT00000025447 | .       | promoter   | .      | rs787075361   | 2 |
| AC.GT        | 13 | 218139850 | 218139860 | 5.5     | .                  | .       | intergenic | .      | rs789658886   | 2 |
| AAAT.ATTT    | 14 | 491997    | 492010    | 3.5     | .                  | .       | intergenic | .      | rs792157345   | 2 |
| AT.AT        | 14 | 608566    | 608582    | 8.5     | .                  | .       | intergenic | .      | rs793520912   | 2 |
| AAAT.ATTT    | 14 | 778302    | 778324    | 5.75    | .                  | .       | intergenic | .      | 315963 rs7867 | 2 |
| AC.GT        | 14 | 790321    | 790332    | 6       | .                  | .       | intergenic | .      | rs786985176   | 2 |
| AC.GT        | 14 | 1483716   | 1483727   | 6       | .                  | .       | intergenic | -0.355 | 316276 rs7881 | 3 |
| AAAC.GTTT    | 14 | 1508227   | 1508249   | 5.75    | .                  | .       | intergenic | -0.117 | 289546 rs7897 | 2 |
| AAAAT.ATTTT  | 14 | 1536844   | 1536881   | 7.6     | .                  | .       | intergenic | -0.212 | rs789489002   | 2 |
| AAAT.ATTT    | 14 | 1666663   | 1666677   | 3.75    | .                  | .       | intergenic | .      | 223218 rs7884 | 2 |
| ACC.GGT      | 14 | 2018100   | 2018113   | 4.66667 | .                  | .       | intergenic | .      | rs792925621   | 2 |
| AG.CT        | 14 | 2737880   | 2737898   | 9.5     | .                  | .       | intergenic | .      | 360680 rs7867 | 2 |
| AG.CT        | 14 | 2949759   | 2949771   | 6.5     | .                  | .       | intergenic | .      | 349589 rs7862 | 2 |
| AC.GT        | 14 | 3051851   | 3051868   | 9       | .                  | .       | intergenic | -0.415 | .             | 2 |
| AC.GT        | 14 | 3055809   | 3055820   | 6       | .                  | .       | intergenic | -0.259 | 362035 rs7930 | 3 |
| AAAC.GTTT    | 14 | 3183102   | 3183120   | 4.75    | ENSSSCT00000010511 | .       | intron     | .      | rs792282895   | 2 |
| AG.CT        | 14 | 3494595   | 3494626   | 16      | .                  | .       | intergenic | 0.555  | .             | 5 |
| AAC.GTT      | 14 | 3538529   | 3538543   | 5       | .                  | .       | intergenic | -0.097 | rs788624018   | 2 |
| AT.AT        | 14 | 3673512   | 3673523   | 6       | .                  | .       | intergenic | 0.148  | rs787915505   | 2 |
| AC.GT        | 14 | 3705230   | 3705246   | 8.5     | .                  | .       | intergenic | 0.029  | 302860 rs6911 | 4 |
| AGG.CCT      | 14 | 3736736   | 3736756   | 7       | .                  | .       | intergenic | -0.249 | rs793085551   | 2 |
| AAAAT.ATTTT  | 14 | 3810693   | 3810710   | 3.6     | .                  | .       | intergenic | .      | .             | 2 |
| \AAAAC.GTTTT | 14 | 3830594   | 3830612   | 3.16667 | .                  | .       | intergenic | 0.714  | rs792472184   | 2 |
| AT.AT        | 14 | 3986912   | 3986923   | 6       | ENSSSCT00000010516 | SPTLC1  | intron     | -0.207 | rs789511956   | 2 |
| AAAAT.ATTTT  | 14 | 3992310   | 3992327   | 3.6     | ENSSSCT00000010516 | SPTLC1  | intron     | .      | 384429 rs7863 | 4 |
| AAAC.GTTT    | 14 | 4097610   | 4097628   | 4.75    | .                  | .       | intergenic | .      | rs793082015   | 2 |
| AAAAT.ATTTT  | 14 | 4123637   | 4123655   | 3.8     | .                  | .       | intergenic | .      | rs786403505   | 3 |
| \AAAAC.GTTTT | 14 | 4139248   | 4139270   | 3.83333 | .                  | .       | intergenic | .      | 366311 rs7875 | 2 |
| AC.GT        | 14 | 4298003   | 4298014   | 6       | ENSSSCT00000010524 | SLC18A1 | intron     | 1.457  | rs793824270   | 3 |
| AATC.GATT    | 14 | 4482547   | 4482565   | 4.75    | ENSSSCT00000010521 | .       | promoter   | -0.047 | .             | 2 |
| AAAG.CTTT    | 14 | 4663716   | 4663744   | 7.25    | ENSSSCT00000010526 | .       | intron     | -0.145 | 302078 rs7936 | 2 |
| AAAC.GTTT    | 14 | 4884657   | 4884673   | 4.25    | .                  | .       | intergenic | 0.008  | 357611 rs7882 | 2 |
| AT.AT        | 14 | 5047952   | 5047962   | 5.5     | .                  | .       | intergenic | -0.119 | rs788832415   | 2 |
| ACC.GGT      | 14 | 5073333   | 5073349   | 5.66667 | .                  | .       | intergenic | .      | rs791904975   | 2 |
| AAAC.GTTT    | 14 | 5482203   | 5482220   | 4.5     | .                  | .       | intergenic | 0.168  | 365302 rs7869 | 2 |
| AC.GT        | 14 | 5566676   | 5566686   | 5.5     | .                  | .       | intergenic | 0.18   | rs790193301   | 2 |
| AG.CT        | 14 | 5577092   | 5577101   | 5       | .                  | .       | intergenic | .      | .             | 2 |
| AG.CT        | 14 | 5703411   | 5703420   | 5       | .                  | .       | intergenic | -0.06  | .             | 2 |
| AC.GT        | 14 | 6075191   | 6075200   | 5       | ENSSSCT00000010528 | GFRA2   | intron     | .      | .             | 2 |
| AATT.AATT    | 14 | 6779768   | 6779786   | 4.75    | ENSSSCT00000010536 | DMTN    | intron     | 0.194  | rs788835676   | 2 |
| AAAG.CTTT    | 14 | 6868798   | 6868812   | 3.75    | .                  | .       | intergenic | 0.07   | 349361 rs7896 | 3 |
| AAC.GTT      | 14 | 7149260   | 7149274   | 5       | .                  | .       | intergenic | .      | rs790209760   | 2 |

|             |    |          |          |         |                    |          |            |        |                 |   |
|-------------|----|----------|----------|---------|--------------------|----------|------------|--------|-----------------|---|
| AT.AT       | 14 | 7346536  | 7346560  | 12.5    | ENSSSCT00000010555 | CCAR2    | intron     | 0.164  | rs786551605     | 2 |
| AATG.CATT   | 14 | 7448191  | 7448211  | 5.25    | ENSSSCT00000010558 | PEBP4    | intron     | -0.023 | rs792639896     | 2 |
| AG.CT       | 14 | 7729173  | 7729187  | 7.5     | .                  | .        | intergenic | .      | rs344106 rs7888 | 3 |
| AAC.GTT     | 14 | 8409667  | 8409692  | 8.66667 | .                  | .        | intergenic | -0.317 | rs793256105     | 2 |
| AAAAC.GTTTT | 14 | 8412002  | 8412031  | 6       | .                  | .        | intergenic | .      | rs789983743     | 2 |
| AG.CT       | 14 | 8946417  | 8946440  | 12      | .                  | .        | intergenic | 0.071  | rs791342469     | 4 |
| AC.GT       | 14 | 8975508  | 8975518  | 5.5     | .                  | .        | intergenic | -0.077 | .               | 3 |
| AT.AT       | 14 | 9376934  | 9376944  | 5.5     | .                  | .        | intergenic | -0.032 | .               | 2 |
| AAC.GTT     | 14 | 9403020  | 9403039  | 6.66667 | .                  | .        | intergenic | -0.005 | rs792614825     | 2 |
| AAT.ATT     | 14 | 9584228  | 9584240  | 4.33333 | .                  | .        | intergenic | -0.077 | rs787453619     | 2 |
| AAAC.GTTT   | 14 | 9686706  | 9686720  | 3.75    | .                  | .        | intergenic | .      | rs790177688     | 2 |
| AC.GT       | 14 | 9703663  | 9703681  | 9.5     | .                  | .        | intergenic | 0.032  | .               | 2 |
| AGAT.ATCT   | 14 | 9730791  | 9730802  | 3       | .                  | .        | intergenic | 0.026  | rs338996 rs7931 | 3 |
| AT.AT       | 14 | 9913438  | 9913452  | 7.5     | .                  | .        | intergenic | .      | .               | 3 |
| AC.GT       | 14 | 10363270 | 10363282 | 6.5     | .                  | .        | intergenic | .      | rs791593380     | 3 |
| AAATG.CATTT | 14 | 10569334 | 10569352 | 3.8     | ENSSSCT00000010579 | DOCK5    | intron     | -0.059 | rs788392806     | 2 |
| AT.AT       | 14 | 10747817 | 10747826 | 5       | .                  | .        | intergenic | 0.016  | rs691686128     | 3 |
| AC.GT       | 14 | 10792086 | 10792096 | 5.5     | .                  | .        | intergenic | 0.245  | .               | 4 |
| AC.GT       | 14 | 10816991 | 10817009 | 9.5     | .                  | .        | intergenic | 0.043  | rs789879639     | 5 |
| AG.CT       | 14 | 10970817 | 10970829 | 6.5     | .                  | .        | intergenic | 0.269  | rs790529710     | 4 |
| AC.GT       | 14 | 11114367 | 11114377 | 5.5     | ENSSSCT00000010585 | .        | intron     | 1.097  | .               | 2 |
| AC.GT       | 14 | 11215250 | 11215261 | 6       | .                  | .        | intergenic | -0.924 | rs384958 rs7879 | 2 |
| AC.GT       | 14 | 11319149 | 11319161 | 6.5     | .                  | .        | intergenic | 0.088  | rs259853 rs7923 | 2 |
| AAAC.GTTT   | 14 | 11456361 | 11456381 | 5.25    | .                  | .        | intergenic | .      | rs792550318     | 2 |
| ATC.GAT     | 14 | 11458887 | 11458911 | 8.33333 | .                  | .        | intergenic | .      | rs788087016     | 2 |
| AAAC.GTTT   | 14 | 11498762 | 11498776 | 3.75    | ENSSSCT00000010590 | BNIP3L   | intron     | .      | rs788977131     | 2 |
| AAGG.CTTT   | 14 | 11588508 | 11588526 | 4.75    | .                  | .        | intergenic | -0.032 | rs220305 rs7915 | 2 |
| ATCC.GGAT   | 14 | 11858503 | 11858531 | 7.25    | ENSSSCT00000010593 | ALPHA-1A | intron     | 0.162  | .               | 2 |
| AAAAC.GTTTT | 14 | 11954616 | 11954636 | 4.2     | .                  | .        | intergenic | 0.592  | rs324917 rs7871 | 2 |
| AAT.ATT     | 14 | 12000129 | 12000141 | 4.33333 | .                  | .        | intergenic | 0.202  | .               | 2 |
| AAC.GTT     | 14 | 12524230 | 12524243 | 4.66667 | ENSSSCT00000010601 | CLU      | intron     | 0.084  | rs791657364     | 3 |
| AAC.GTT     | 14 | 12524230 | 12524243 | 4.66667 | ENSSSCT00000036649 | CLU      | intron     | 0.084  | rs791657364     | 3 |
| AAC.GTT     | 14 | 12524230 | 12524243 | 4.66667 | ENSSSCT00000035611 | CLU      | intron     | 0.084  | rs791657364     | 3 |
| AAC.GTT     | 14 | 12524230 | 12524243 | 4.66667 | ENSSSCT00000033441 | CLU      | intron     | 0.084  | rs791657364     | 3 |
| AAC.GTT     | 14 | 12524230 | 12524243 | 4.66667 | ENSSSCT00000034107 | CLU      | intron     | 0.084  | rs791657364     | 3 |
| AC.GT       | 14 | 12570705 | 12570716 | 6       | ENSSSCT00000025007 | SCARA3   | intron     | .      | rs789247999     | 4 |
| AG.CT       | 14 | 12606676 | 12606687 | 6       | .                  | .        | intergenic | 0.109  | .               | 2 |
| AAAT.ATTT   | 14 | 12690849 | 12690872 | 6       | ENSSSCT00000010603 | ESCO2    | intron     | 1.388  | rs787127579     | 2 |
| AAAT.ATTT   | 14 | 12731791 | 12731809 | 4.75    | ENSSSCT00000010604 | PBK      | intron     | .      | rs787919085     | 2 |
| AC.GT       | 14 | 12800633 | 12800648 | 8       | .                  | .        | intergenic | .      | rs789511203     | 2 |
| AG.CT       | 14 | 13194254 | 13194266 | 6.5     | .                  | .        | intergenic | -0.144 | rs790538808     | 2 |
| AAAG.CTTT   | 14 | 13396395 | 13396407 | 3.25    | ENSSSCT00000010612 | FBXO16   | intron     | .      | rs788573208     | 4 |
| AC.GT       | 14 | 13420516 | 13420537 | 11      | ENSSSCT00000010612 | FBXO16   | intron     | 0.113  | rs788584938     | 2 |
| AAAAC.GTTTT | 14 | 13614573 | 13614593 | 4.2     | .                  | .        | intergenic | .      | rs374685 rs7906 | 2 |
| AGC.GCT     | 14 | 13620387 | 13620403 | 5.66667 | .                  | .        | intergenic | 0.134  | rs786240165     | 2 |
| AAAAC.GTTTT | 14 | 13637459 | 13637478 | 4       | .                  | .        | intergenic | 0.087  | .               | 2 |
| AAG.CTT     | 14 | 13681054 | 13681066 | 4.33333 | ENSSSCT00000010614 | EXTL3    | intron     | 0.031  | .               | 2 |
| AAAT.ATTT   | 14 | 13686069 | 13686099 | 7.75    | ENSSSCT00000010614 | EXTL3    | intron     | .      | rs571316 rs7927 | 2 |
| AAAC.GTTT   | 14 | 13714065 | 13714085 | 5.25    | .                  | .        | intergenic | -0.014 | rs787364606     | 2 |
| AT.AT       | 14 | 14031371 | 14031389 | 9.5     | ENSSSCT00000010617 | HMBOX1   | intron     | 0.187  | .               | 2 |
| AT.AT       | 14 | 14031371 | 14031389 | 9.5     | ENSSSCT00000010616 | HMBOX1   | intron     | 0.187  | .               | 2 |
| AC.GT       | 14 | 14158960 | 14158970 | 5.5     | ENSSSCT00000010618 | KIF13B   | intron     | -0.434 | rs791671713     | 2 |
| AC.GT       | 14 | 14225686 | 14225719 | 17      | ENSSSCT00000010618 | KIF13B   | intron     | 0.79   | rs241762 rs7869 | 3 |
| AAAAG.CTTTT | 14 | 14228378 | 14228394 | 3.4     | ENSSSCT00000010618 | KIF13B   | intron     | -0.064 | .               | 2 |
| AC.GT       | 14 | 14244067 | 14244084 | 9       | ENSSSCT00000010618 | KIF13B   | intron     | 0.607  | rs159424 rs7906 | 2 |
| AG.CT       | 14 | 14257015 | 14257025 | 5.5     | ENSSSCT00000010618 | KIF13B   | intron     | -0.12  | rs787173718     | 2 |
| AC.GT       | 14 | 14318289 | 14318299 | 5.5     | ENSSSCT00000010618 | KIF13B   | intron     | 0.134  | .               | 2 |
| AAT.ATT     | 14 | 14409639 | 14409658 | 6.66667 | .                  | .        | intergenic | .      | rs787439291     | 2 |
| AAAG.CTTT   | 14 | 14680014 | 14680035 | 5.5     | ENSSSCT00000010619 | MSRA     | intron     | 0.664  | rs792994866     | 2 |
| AAAAT.ATTTT | 14 | 14978734 | 14978770 | 7.4     | ENSSSCT00000010619 | MSRA     | intron     | 0.012  | rs786729596     | 2 |
| ATC.GAT     | 14 | 15160949 | 15160963 | 5       | .                  | .        | intergenic | -0.166 | rs790538630     | 3 |
| AC.GT       | 14 | 15193452 | 15193472 | 10.5    | .                  | .        | intergenic | .      | .               | 2 |
| AAC.GTT     | 14 | 15421106 | 15421122 | 5.66667 | ENSSSCT00000010627 | PINX1    | intron     | -0.206 | rs303208 rs7895 | 2 |
| AAGG.CCTT   | 14 | 15601723 | 15601740 | 4.5     | .                  | .        | intergenic | 0.848  | rs151197 rs7910 | 2 |
| AAC.GTT     | 14 | 15907738 | 15907754 | 5.66667 | .                  | .        | intergenic | .      | rs789981557     | 3 |
| AG.CT       | 14 | 15954581 | 15954593 | 6.5     | .                  | .        | intergenic | -0.524 | .               | 3 |
| AG.CT       | 14 | 15992530 | 15992544 | 7.5     | .                  | .        | intergenic | -0.067 | .               | 2 |
| AC.GT       | 14 | 16385033 | 16385047 | 7.5     | .                  | .        | intergenic | .      | rs788738459     | 2 |
| AAAAC.GTTTT | 14 | 16473012 | 16473046 | 5.83333 | .                  | .        | intergenic | -0.08  | rs162645 rs7873 | 2 |
| AAAAC.GTTTT | 14 | 16694142 | 16694160 | 3.8     | .                  | .        | intergenic | .      | rs793771081     | 2 |
| AAAC.GTTT   | 14 | 17074002 | 17074016 | 3.75    | ENSSSCT00000010637 | FBXO8    | intron     | 0.074  | rs790870194     | 2 |
| AC.GT       | 14 | 17194365 | 17194386 | 11      | .                  | .        | intergenic | 0.23   | rs786685005     | 4 |
| AAAG.CTTT   | 14 | 17331605 | 17331631 | 6.75    | .                  | .        | intergenic | 0.569  | rs254720 rs7875 | 2 |
| AC.GT       | 14 | 17390198 | 17390210 | 6.5     | .                  | .        | intergenic | -0.048 | rs791834067     | 3 |
| AAAT.ATTT   | 14 | 17578013 | 17578027 | 3.75    | .                  | .        | intergenic | 0.378  | .               | 2 |
| AC.GT       | 14 | 17785426 | 17785439 | 7       | .                  | .        | intergenic | .      | rs355858 rs7934 | 3 |
| AAAC.GTTT   | 14 | 17848733 | 17848749 | 4.25    | .                  | .        | intergenic | .      | rs328175 rs7873 | 2 |
| AAAC.GTTT   | 14 | 17922341 | 17922370 | 7.5     | ENSSSCT00000010641 | GALNT7   | intron     | -0.212 | rs332852 rs7920 | 2 |
| AC.GT       | 14 | 17941638 | 17941657 | 10      | .                  | .        | intergenic | -0.289 | rs760526 rs7868 | 2 |
| AAAG.CTTT   | 14 | 18018293 | 18018311 | 4.75    | .                  | .        | intergenic | 0.579  | rs694348998     | 2 |
| AAAC.GTTT   | 14 | 18199148 | 18199168 | 5.25    | .                  | .        | intergenic | .      | rs792350932     | 2 |
| AAAT.ATTT   | 14 | 18204844 | 18204861 | 4.5     | .                  | .        | intergenic | .      | rs788864451     | 2 |
| AAT.ATT     | 14 | 18552646 | 18552659 | 4.66667 | .                  | .        | intergenic | -0.111 | rs793629881     | 2 |
| AAAAT.ATTTT | 14 | 18563196 | 18563218 | 4.6     | .                  | .        | intergenic | 0.609  | rs791845355     | 2 |



|              |    |          |          |         |                    |        |            |        |                 |   |
|--------------|----|----------|----------|---------|--------------------|--------|------------|--------|-----------------|---|
| AC.GT        | 14 | 18589239 | 18589251 | 6.5     | .                  | .      | intergenic | -0.011 | rs21859 rs7864  | 2 |
| AC.GT        | 14 | 18653884 | 18653898 | 7.5     | .                  | .      | intergenic | 0.033  | rs790245846     | 2 |
| AAAAG.CTTTT  | 14 | 18752222 | 18752246 | 5       | .                  | .      | intergenic | .      | rs362392 rs7059 | 2 |
| AAC.GTT      | 14 | 18831613 | 18831635 | 7.66667 | .                  | .      | intergenic | -0.234 | rs699130384     | 3 |
| AATT.AATT    | 14 | 18841086 | 18841100 | 3.75    | .                  | .      | intergenic | -0.061 | .               | 2 |
| AAAC.GTTT    | 14 | 19042125 | 19042150 | 6.5     | .                  | .      | intergenic | -0.135 | rs693177946     | 2 |
| AC.GT        | 14 | 19088453 | 19088463 | 5.5     | .                  | .      | intergenic | 0.215  | rs692694970     | 2 |
| AAAC.GTTT    | 14 | 19315090 | 19315115 | 6.5     | .                  | .      | intergenic | -0.226 | .               | 2 |
| AC.GT        | 14 | 19356786 | 19356796 | 5.5     | .                  | .      | intergenic | .      | rs793080581     | 2 |
| AAAC.GTTT    | 14 | 19429363 | 19429377 | 3.75    | .                  | .      | intergenic | 0.034  | rs789048652     | 2 |
| AAAC.GTTT    | 14 | 19561761 | 19561777 | 4.25    | .                  | .      | intergenic | .      | rs793238902     | 2 |
| AC.GT        | 14 | 19569198 | 19569228 | 15.5    | .                  | .      | intergenic | .      | rs349804 rs7918 | 4 |
| AAAAG.CTTTT  | 14 | 19577819 | 19577847 | 5.8     | .                  | .      | intergenic | .      | rs700674711     | 2 |
| AC.GT        | 14 | 19758999 | 19759008 | 5       | .                  | .      | intergenic | .      | .               | 2 |
| AG.CT        | 14 | 19830168 | 19830197 | 15      | .                  | .      | intergenic | -0.136 | rs789885277     | 3 |
| AT.AT        | 14 | 20049437 | 20049453 | 8.5     | .                  | .      | intergenic | -0.041 | rs787800268     | 2 |
| AC.GT        | 14 | 20093861 | 20093871 | 5.5     | .                  | .      | intergenic | -0.268 | rs790093673     | 2 |
| AAGG.CCTT    | 14 | 20167717 | 20167732 | 4       | .                  | .      | intergenic | .      | rs787530512     | 2 |
| AC.GT        | 14 | 20319374 | 20319394 | 10.5    | .                  | .      | intergenic | .      | rs787198196     | 2 |
| AT.AT        | 14 | 20629761 | 20629770 | 5       | .                  | .      | intergenic | -0.222 | .               | 4 |
| AGAT.ATCT    | 14 | 20667271 | 20667290 | 5       | .                  | .      | intergenic | .      | .               | 2 |
| AT.AT        | 14 | 20808313 | 20808324 | 6       | .                  | .      | intergenic | .      | rs793849147     | 2 |
| AAAT.ATTT    | 14 | 20820541 | 20820556 | 4       | .                  | .      | intergenic | 0.16   | rs788371100     | 2 |
| AAC.GTT      | 14 | 20862779 | 20862790 | 4       | .                  | .      | intergenic | .      | rs792883743     | 2 |
| AC.GT        | 14 | 20964314 | 20964330 | 8.5     | .                  | .      | intergenic | 0.013  | .               | 2 |
| AC.GT        | 14 | 21025418 | 21025427 | 5       | .                  | .      | intergenic | .      | rs695436509     | 4 |
| AAAAAC.GTTTT | 14 | 21213633 | 21213654 | 3.66667 | .                  | .      | intergenic | 0.06   | rs799153 rs7898 | 2 |
| AAAG.CTTT    | 14 | 21368830 | 21368848 | 4.75    | ENSSSCT00000010649 | CLCN3  | intron     | 0.267  | rs297380 rs7916 | 2 |
| AG.CT        | 14 | 21412970 | 21412982 | 6.5     | ENSSSCT00000027721 | .      | promoter   | 0.175  | .               | 3 |
| AC.GT        | 14 | 21451964 | 21451974 | 5.5     | ENSSSCT00000010651 | NEK1   | intron     | .      | rs793443492     | 3 |
| AC.GT        | 14 | 21451964 | 21451974 | 5.5     | ENSSSCT00000010650 | NEK1   | intron     | .      | rs793443492     | 3 |
| AAAAC.GTTTT  | 14 | 21505393 | 21505418 | 5.2     | ENSSSCT00000010651 | NEK1   | intron     | 0.117  | rs787036419     | 2 |
| AAAAC.GTTTT  | 14 | 21505393 | 21505418 | 5.2     | ENSSSCT00000010650 | NEK1   | intron     | 0.117  | rs787036419     | 2 |
| ACAG.CTGT    | 14 | 21648148 | 21648166 | 4.75    | .                  | .      | intergenic | .      | rs788813491     | 2 |
| AAAC.GTTT    | 14 | 21823957 | 21823980 | 6       | ENSSSCT00000010652 | SH3RF1 | intron     | .      | rs792986608     | 2 |
| AATC.GATT    | 14 | 21925644 | 21925660 | 4.25    | ENSSSCT00000010653 | CBR4   | intron     | .      | rs792754673     | 2 |
| AAAAT.ATTTT  | 14 | 21953362 | 21953392 | 6.2     | .                  | .      | intergenic | .      | rs323792 rs7903 | 2 |
| AC.GT        | 14 | 22005038 | 22005048 | 5.5     | ENSSSCT00000022985 | PALLD  | intron     | 0.195  | rs791130042     | 3 |
| AT.AT        | 14 | 22280701 | 22280715 | 7.5     | .                  | .      | intergenic | 0.228  | .               | 2 |
| AAC.GTT      | 14 | 22367009 | 22367025 | 5.66667 | ENSSSCT00000010657 | DDX60  | promoter   | 0.068  | rs142492 rs7879 | 4 |
| AC.GT        | 14 | 22424991 | 22425016 | 13      | .                  | .      | intergenic | 0.196  | .               | 2 |
| AC.GT        | 14 | 22605403 | 22605416 | 7       | ENSSSCT00000028371 | ANXA10 | intron     | 0.133  | rs788678528     | 2 |
| AC.GT        | 14 | 22605403 | 22605416 | 7       | ENSSSCT00000028014 | ANXA10 | intron     | 0.133  | rs788678528     | 2 |
| AT.AT        | 14 | 22641696 | 22641721 | 13      | ENSSSCT00000028371 | ANXA10 | intron     | -0.003 | rs791995613     | 2 |
| AT.AT        | 14 | 22641696 | 22641721 | 13      | ENSSSCT00000028014 | ANXA10 | intron     | -0.003 | rs791995613     | 2 |
| AT.AT        | 14 | 22741629 | 22741640 | 6       | .                  | .      | intergenic | 0.086  | rs790354788     | 2 |
| AC.GT        | 14 | 22978953 | 22978971 | 9.5     | .                  | .      | intergenic | .      | rs709886859     | 3 |
| AGG.CCT      | 14 | 23029128 | 23029145 | 6       | .                  | .      | intergenic | 0.06   | rs191036 rs7926 | 3 |
| AAAAC.GTTTT  | 14 | 23102685 | 23102706 | 4.4     | ENSSSCT00000010659 | SPOCK3 | intron     | .      | rs275413 rs7875 | 3 |
| AC.GT        | 14 | 23164160 | 23164176 | 8.5     | ENSSSCT00000010659 | SPOCK3 | intron     | -0.024 | .               | 2 |
| AC.GT        | 14 | 23210920 | 23210966 | 23.5    | ENSSSCT00000010659 | SPOCK3 | intron     | .      | rs793855535     | 2 |
| AC.GT        | 14 | 23256471 | 23256483 | 6.5     | ENSSSCT00000010659 | SPOCK3 | intron     | -0.033 | .               | 3 |
| AAAAAG.CTTTT | 14 | 23275043 | 23275065 | 3.83333 | ENSSSCT00000010659 | SPOCK3 | intron     | -0.133 | rs789014607     | 2 |
| AAAC.GTTT    | 14 | 23425674 | 23425692 | 4.75    | ENSSSCT00000010659 | SPOCK3 | intron     | .      | rs791960229     | 2 |
| AAAC.GTTT    | 14 | 23426916 | 23426937 | 5.5     | ENSSSCT00000010659 | SPOCK3 | intron     | .      | rs111232 rs7885 | 2 |
| AAT.ATT      | 14 | 23473095 | 23473110 | 5.33333 | ENSSSCT00000010659 | SPOCK3 | intron     | .      | rs788100199     | 2 |
| AG.CT        | 14 | 23575885 | 23575895 | 5.5     | .                  | .      | intergenic | .      | rs792998908     | 2 |
| AAAT.ATTT    | 14 | 23597428 | 23597450 | 5.75    | .                  | .      | intergenic | -0.194 | rs70692 rs7893  | 2 |
| AAAT.ATTT    | 14 | 23768268 | 23768285 | 4.5     | .                  | .      | intergenic | .      | rs791902483     | 2 |
| AAAAG.CTTTT  | 14 | 23781906 | 23781921 | 3.2     | .                  | .      | intergenic | .      | rs348428 rs7879 | 2 |
| AAC.GTTT     | 14 | 23851398 | 23851415 | 6       | .                  | .      | intergenic | .      | rs786991550     | 2 |
| AAAC.GTTT    | 14 | 23851723 | 23851745 | 5.75    | .                  | .      | intergenic | .      | rs71263 rs7916  | 2 |
| AAAAAG.CTTTT | 14 | 24102116 | 24102134 | 3.16667 | ENSSSCT00000010671 | .      | intron     | .      | rs705486960     | 2 |
| AAAC.GTTT    | 14 | 24233232 | 24233254 | 5.75    | .                  | .      | intergenic | .      | rs789414433     | 2 |
| AAAC.GTTT    | 14 | 24524288 | 24524305 | 4.5     | .                  | .      | intergenic | .      | rs791166863     | 2 |
| AATG.CATT    | 14 | 24685331 | 24685353 | 5.75    | ENSSSCT00000010677 | GALNT9 | intron     | .      | rs790960525     | 2 |
| AT.AT        | 14 | 25766927 | 25766942 | 8       | ENSSSCT00000010684 | GPR133 | intron     | -0.529 | .               | 2 |
| AAAAC.GTTTT  | 14 | 25996283 | 25996297 | 3       | .                  | .      | intergenic | -0.094 | rs790555062     | 2 |
| AC.GT        | 14 | 26021986 | 26022000 | 7.5     | .                  | .      | intergenic | .      | rs73898 rs7904  | 2 |
| AAAT.ATTT    | 14 | 26022292 | 26022312 | 5.25    | .                  | .      | intergenic | .      | rs788040466     | 2 |
| AC.GT        | 14 | 26432079 | 26432098 | 10      | .                  | .      | intergenic | -0.538 | rs792377483     | 3 |
| AAAG.CTTT    | 14 | 26448401 | 26448431 | 7.75    | .                  | .      | intergenic | -0.047 | rs786237452     | 2 |
| CAGAG.CTCTG  | 14 | 26724931 | 26724954 | 4       | .                  | .      | intergenic | .      | rs786415066     | 2 |
| AT.AT        | 14 | 26889663 | 26889672 | 5       | .                  | .      | intergenic | -0.49  | rs788859356     | 4 |
| AC.GT        | 14 | 26905253 | 26905267 | 7.5     | .                  | .      | intergenic | .      | rs329658 rs7882 | 2 |
| AAGG.CCTT    | 14 | 27158328 | 27158360 | 8.25    | .                  | .      | intergenic | -0.205 | rs786768159     | 2 |
| AG.CT        | 14 | 27239740 | 27239749 | 5       | .                  | .      | intergenic | -0.32  | .               | 3 |
| AAAC.GTTT    | 14 | 27256606 | 27256620 | 3.75    | .                  | .      | intergenic | -0.307 | rs382196 rs7918 | 2 |
| AC.GT        | 14 | 27301601 | 27301616 | 8       | .                  | .      | intergenic | .      | rs776856 rs7928 | 2 |
| AT.AT        | 14 | 27322624 | 27322643 | 10      | .                  | .      | intergenic | .      | rs345473 rs7927 | 2 |
| AAAAC.GTTTT  | 14 | 27344249 | 27344280 | 6.4     | .                  | .      | intergenic | -0.193 | rs788653703     | 2 |
| AAAT.ATTT    | 14 | 27378811 | 27378825 | 3.75    | .                  | .      | intergenic | .      | rs789132968     | 2 |
| AAAC.GTTT    | 14 | 27403463 | 27403481 | 4.75    | .                  | .      | intergenic | -0.306 | rs787427900     | 2 |
| AC.GT        | 14 | 27444284 | 27444298 | 7.5     | .                  | .      | intergenic | -0.328 | rs349421 rs7899 | 2 |



|              |    |          |          |         |                    |          |            |        |               |   |
|--------------|----|----------|----------|---------|--------------------|----------|------------|--------|---------------|---|
| AC.GT        | 14 | 27794635 | 27794649 | 7.5     | ENSSSCT00000031300 | SLC15A4  | intron     | -0.284 | rs792549984   | 2 |
| AT.AT        | 14 | 27985563 | 27985573 | 5.5     | ENSSSCT00000010692 | .        | intron     | .      | rs786416081   | 2 |
| AG.CT        | 14 | 28111956 | 28111972 | 8.5     | ENSSSCT00000010692 | .        | intron     | -0.058 | .             | 2 |
| AAAT.ATTT    | 14 | 28259852 | 28259876 | 6.25    | ENSSSCT00000010692 | .        | intron     | -0.347 | rs792344317   | 2 |
| AG.CT        | 14 | 28342004 | 28342016 | 6.5     | .                  | .        | intergenic | -0.344 | rs790440171   | 2 |
| AAAAC.GTTTT  | 14 | 28362320 | 28362343 | 4       | .                  | .        | intergenic | .      | rs788236202   | 2 |
| AAAAC.GTTTT  | 14 | 28437992 | 28438020 | 5.8     | .                  | .        | intergenic | .      | rs789802100   | 3 |
| AAAC.GTTT    | 14 | 28449894 | 28449912 | 4.75    | .                  | .        | intergenic | -0.128 | rs790890270   | 2 |
| AAT.ATT      | 14 | 28473061 | 28473077 | 5.66667 | .                  | .        | intergenic | 0.188  | 309163 rs7920 | 2 |
| AATC.GATT    | 14 | 28578047 | 28578066 | 5       | .                  | .        | intergenic | .      | rs786228866   | 2 |
| AAG.CTT      | 14 | 28673450 | 28673466 | 5.66667 | .                  | .        | intergenic | -0.172 | 701323 rs7900 | 2 |
| AAAC.GTTT    | 14 | 28689932 | 28689947 | 4       | .                  | .        | intergenic | -0.259 | rs786903841   | 2 |
| AC.GT        | 14 | 28731121 | 28731152 | 16      | .                  | .        | intergenic | -0.212 | rs790154934   | 5 |
| AAG.CTT      | 14 | 28825250 | 28825275 | 8.66667 | .                  | .        | intergenic | -0.243 | 224344 rs7919 | 4 |
| AAG.CTT      | 14 | 28889873 | 28889906 | 11.3333 | .                  | .        | intergenic | -0.245 | rs790224340   | 2 |
| AAC.GTT      | 14 | 28963522 | 28963543 | 7.33333 | .                  | .        | intergenic | -0.348 | rs793055253   | 2 |
| AC.GT        | 14 | 29027868 | 29027878 | 5.5     | .                  | .        | intergenic | -0.01  | rs793271609   | 2 |
| AG.CT        | 14 | 29110487 | 29110503 | 8.5     | .                  | .        | intergenic | .      | rs793088220   | 2 |
| AAAC.GTTT    | 14 | 29212623 | 29212639 | 4.25    | .                  | .        | intergenic | -0.273 | rs792247471   | 2 |
| AAAAC.GTTTT  | 14 | 29385614 | 29385637 | 4.8     | .                  | .        | intergenic | -0.262 | 41514 rs7925  | 2 |
| AT.AT        | 14 | 29485409 | 29485418 | 5       | ENSSSCT00000010693 | TMEM132E | intron     | .      | rs793380917   | 3 |
| AT.AT        | 14 | 29492382 | 29492401 | 10      | ENSSSCT00000010693 | TMEM132E | intron     | .      | 351348 rs7933 | 2 |
| AAAC.GTTT    | 14 | 29547350 | 29547372 | 5.75    | ENSSSCT00000010693 | TMEM132E | intron     | -0.263 | .             | 2 |
| AC.GT        | 14 | 29713365 | 29713384 | 10      | .                  | .        | intergenic | .      | rs789449130   | 2 |
| AAAAG.CTTTT  | 14 | 29792190 | 29792213 | 4.8     | .                  | .        | intergenic | 0.063  | rs789507887   | 2 |
| AC.GT        | 14 | 29834340 | 29834349 | 5       | ENSSSCT00000010695 | AACS     | intron     | -0.873 | rs791104563   | 2 |
| AAAC.GTTT    | 14 | 30072056 | 30072074 | 4.75    | ENSSSCT00000010699 | SCARB1   | intron     | -0.318 | rs787983158   | 2 |
| ACACC.GGTGT  | 14 | 30624973 | 30624987 | 3       | .                  | .        | intergenic | -0.051 | rs793553618   | 2 |
| AT.AT        | 14 | 30895586 | 30895596 | 5.5     | ENSSSCT00000010707 | DNAH10   | intron     | 1.273  | rs791367805   | 2 |
| AAAAT.ATTTT  | 14 | 31046795 | 31046810 | 3.2     | ENSSSCT00000010711 | GTF2H3   | intron     | 0.024  | .             | 2 |
| AAAAT.ATTTT  | 14 | 31046795 | 31046810 | 3.2     | ENSSSCT00000010712 | EIF2B1   | promoter   | 0.024  | .             | 2 |
| AATC.GATT    | 14 | 31094434 | 31094457 | 6       | ENSSSCT00000010714 | TMED2    | promoter   | 0.26   | rs790856767   | 2 |
| AAAT.ATTT    | 14 | 31472204 | 31472226 | 5.75    | ENSSSCT00000010723 | PITPNM2  | intron     | -0.19  | 397962 rs7899 | 2 |
| AG.CT        | 14 | 31497228 | 31497240 | 6.5     | ENSSSCT00000010723 | PITPNM2  | intron     | -0.374 | .             | 2 |
| AAG.CTT      | 14 | 31531640 | 31531656 | 5.66667 | ENSSSCT00000010723 | PITPNM2  | intron     | -0.15  | 374442 rs7935 | 2 |
| AAAC.GTTT    | 14 | 31578479 | 31578493 | 3.75    | ENSSSCT00000010725 | OGFOD2   | 3'utr      | 0.761  | 206850 rs7891 | 2 |
| AAAC.GTTT    | 14 | 31578479 | 31578493 | 3.75    | ENSSSCT00000010724 | ARL6IP4  | promoter   | 0.761  | 206850 rs7891 | 2 |
| AAC.GTT      | 14 | 31767757 | 31767771 | 5       | ENSSSCT00000010730 | DENR     | intron     | 0.783  | rs788325933   | 2 |
| AAC.GTT      | 14 | 32459654 | 32459670 | 5.66667 | .                  | .        | intergenic | .      | rs788828337   | 2 |
| AAAAC.GTTTT  | 14 | 32469770 | 32469790 | 4.2     | .                  | .        | intergenic | 1.984  | rs789658381   | 2 |
| AGG.CCT      | 14 | 32529921 | 32529937 | 5.66667 | ENSSSCT00000010744 | WDR66    | intron     | -0.342 | rs791556020   | 2 |
| AC.GT        | 14 | 32530718 | 32530742 | 12.5    | ENSSSCT00000010744 | WDR66    | intron     | -0.047 | rs792585074   | 4 |
| AC.GT        | 14 | 32728680 | 32728694 | 7.5     | ENSSSCT00000010751 | TMEM120E | intron     | .      | rs788492582   | 4 |
| AC.GT        | 14 | 32977113 | 32977147 | 17.5    | .                  | .        | intergenic | -0.321 | 176531 rs7934 | 4 |
| AT.AT        | 14 | 33103827 | 33103849 | 11.5    | .                  | .        | intergenic | .      | rs793436139   | 2 |
| AAT.ATT      | 14 | 33275436 | 33275451 | 5.33333 | .                  | .        | intergenic | -0.13  | 279469 rs7910 | 2 |
| AAAT.ATTT    | 14 | 33463361 | 33463387 | 6.75    | .                  | .        | intergenic | .      | .             | 2 |
| AAAT.ATTT    | 14 | 33514604 | 33514637 | 8.5     | .                  | .        | intergenic | -0.134 | rs786723958   | 3 |
| AAAC.GTTT    | 14 | 33832291 | 33832312 | 5.5     | ENSSSCT00000010768 | PPTC7    | intron     | 0.464  | rs790637939   | 2 |
| AAAT.ATTT    | 14 | 33885094 | 33885109 | 4       | .                  | .        | intergenic | .      | rs790167385   | 2 |
| AT.AT        | 14 | 33955323 | 33955336 | 7       | .                  | .        | intergenic | -0.15  | rs787154267   | 2 |
| CACGC.GCGTG  | 14 | 34054889 | 34054922 | 5.66667 | .                  | .        | intergenic | -0.028 | 305490 rs7888 | 2 |
| AC.GT        | 14 | 34086389 | 34086405 | 8.5     | ENSSSCT00000010773 | CCDC63   | intron     | 0.318  | rs787190365   | 5 |
| AAAC.GTTT    | 14 | 34095289 | 34095312 | 6       | ENSSSCT00000010773 | CCDC63   | intron     | -0.156 | rs786319378   | 2 |
| AC.GT        | 14 | 34115278 | 34115290 | 6.5     | ENSSSCT00000010773 | CCDC63   | intron     | -0.229 | 350690 rs7887 | 2 |
| AC.GT        | 14 | 34319820 | 34319834 | 7.5     | .                  | .        | intergenic | -0.129 | rs791342430   | 2 |
| AG.CT        | 14 | 35014844 | 35014854 | 5.5     | .                  | .        | intergenic | 0.049  | 307804 rs7915 | 3 |
| AAC.GTT      | 14 | 35034973 | 35034992 | 6.66667 | ENSSSCT00000010783 | .        | intron     | 0.046  | rs787110337   | 3 |
| AAC.GTT      | 14 | 35047205 | 35047226 | 7.33333 | ENSSSCT00000010783 | .        | intron     | 0.259  | rs787303554   | 2 |
| AAAC.GTTT    | 14 | 35090480 | 35090502 | 5.75    | ENSSSCT00000032561 | .        | intron     | .      | 295117 rs7913 | 2 |
| AAAC.GTTT    | 14 | 35090480 | 35090502 | 5.75    | ENSSSCT00000010783 | .        | intron     | .      | 295117 rs7913 | 2 |
| AT.AT        | 14 | 35184594 | 35184604 | 5.5     | .                  | .        | intergenic | -0.021 | .             | 4 |
| AAGG.CCTT    | 14 | 35316114 | 35316135 | 5.5     | ENSSSCT00000010786 | CCDC60   | intron     | .      | .             | 2 |
| AAGG.CCTT    | 14 | 35432144 | 35432166 | 5.75    | .                  | .        | intergenic | -0.083 | rs787131861   | 3 |
| AAAC.GTTT    | 14 | 35472678 | 35472697 | 5       | .                  | .        | intergenic | -0.059 | 310811 rs7879 | 2 |
| AAAC.GTTT    | 14 | 35606563 | 35606586 | 6       | ENSSSCT00000010791 | .        | intron     | 0.019  | rs787153454   | 2 |
| AAAC.GTTT    | 14 | 35636920 | 35636951 | 8       | .                  | .        | intergenic | -0.18  | rs786665708   | 2 |
| AAAC.GTTT    | 14 | 35846325 | 35846339 | 3.75    | .                  | .        | intergenic | .      | 305515 rs7884 | 2 |
| AG.CT        | 14 | 36035650 | 36035659 | 5       | .                  | .        | intergenic | -0.372 | 740847 rs7929 | 2 |
| AAAAAT.ATTTT | 14 | 36067667 | 36067689 | 3.83333 | .                  | .        | intergenic | 0.031  | 348625 rs7934 | 2 |
| AAG.CTT      | 14 | 36137721 | 36137742 | 7.33333 | .                  | .        | intergenic | 0.224  | 731484 rs7896 | 2 |
| AAAAC.GTTTT  | 14 | 36162962 | 36162990 | 5.8     | .                  | .        | intergenic | .      | rs786410909   | 2 |
| AC.GT        | 14 | 36253606 | 36253616 | 5.5     | .                  | .        | intergenic | 0.042  | .             | 2 |
| AG.CT        | 14 | 36416628 | 36416645 | 9       | ENSSSCT00000010795 | SUDS3    | intron     | -0.16  | rs789423461   | 2 |
| AAAC.GTTT    | 14 | 36468295 | 36468314 | 5       | ENSSSCT00000010796 | TAOK3    | intron     | 0.252  | 324293 rs7868 | 2 |
| AAC.GTT      | 14 | 36675923 | 36675947 | 8.33333 | .                  | .        | intergenic | 0.135  | .             | 2 |
| AAAC.GTTT    | 14 | 36801165 | 36801183 | 4.75    | ENSSSCT00000010801 | RFC5     | intron     | 3.75   | 787379 rs7937 | 2 |
| AAAAC.GTTTT  | 14 | 36880274 | 36880291 | 3       | .                  | .        | intergenic | .      | rs789551600   | 2 |
| AAAAC.GTTTT  | 14 | 36884560 | 36884583 | 4.8     | .                  | .        | intergenic | 0.075  | 316121 rs7893 | 2 |
| AAAT.ATTT    | 14 | 37041926 | 37041942 | 4.25    | .                  | .        | intergenic | .      | rs786544802   | 2 |
| AAC.GTT      | 14 | 37049149 | 37049164 | 5.33333 | ENSSSCT00000010802 | KSR2     | promoter   | .      | .             | 2 |
| AG.CT        | 14 | 37207730 | 37207746 | 8.5     | ENSSSCT00000010802 | KSR2     | intron     | 0.14   | rs786724561   | 3 |
| CACAT.ATGTG  | 14 | 37300488 | 37300508 | 3.5     | ENSSSCT00000010802 | KSR2     | intron     | -0.131 | 392364 rs7938 | 2 |
| AC.GT        | 14 | 37365171 | 37365183 | 6.5     | .                  | .        | intergenic | 0.098  | .             | 3 |

|             |    |          |          |         |                    |          |            |        |                |   |
|-------------|----|----------|----------|---------|--------------------|----------|------------|--------|----------------|---|
| AC.GT       | 14 | 37708265 | 37708283 | 9.5     | ENSSSCT00000010808 | FBXW8    | intron     | .      | rs789012904    | 2 |
| AC.GT       | 14 | 37796511 | 37796534 | 12      | ENSSSCT00000010808 | FBXW8    | promoter   | .      | rs787879530    | 4 |
| AAAC.GTTT   | 14 | 37865409 | 37865427 | 4.75    | ENSSSCT00000010810 | RNFT2    | intron     | 0.657  | rs792049674    | 2 |
| AAT.ATT     | 14 | 37899157 | 37899173 | 5.66667 | ENSSSCT00000010810 | RNFT2    | intron     | .      | rs792810188    | 2 |
| AAAG.CTTT   | 14 | 38104877 | 38104899 | 5.75    | .                  | .        | intergenic | 0.178  | rs704686469    | 3 |
| AAAT.ATTT   | 14 | 38190417 | 38190429 | 3.25    | .                  | .        | intergenic | 0.036  | .              | 2 |
| AATG.CATT   | 14 | 38226107 | 38226140 | 8.5     | .                  | .        | intergenic | 0.152  | 148110 rs7914  | 2 |
| AC.GT       | 14 | 38835985 | 38835996 | 6       | .                  | .        | intergenic | -0.126 | 351490 rs7925  | 2 |
| ATC.GAT     | 14 | 38990094 | 38990118 | 8.33333 | .                  | .        | intergenic | -0.036 | rs791452340    | 2 |
| AC.GT       | 14 | 39128627 | 39128643 | 8.5     | .                  | .        | intergenic | -0.135 | rs793269571    | 2 |
| AC.GT       | 14 | 39160406 | 39160417 | 6       | .                  | .        | intergenic | -0.112 | rs789341322    | 2 |
| AC.GT       | 14 | 39560869 | 39560879 | 5.5     | .                  | .        | intergenic | -1.032 | 180831 rs7891  | 2 |
| AAAAC.GTTTT | 14 | 39887268 | 39887296 | 5.8     | .                  | .        | intergenic | -0.182 | rs790707045    | 2 |
| AAG.CTT     | 14 | 39942876 | 39942911 | 12      | .                  | .        | intergenic | .      | rs790947642    | 2 |
| AT.AT       | 14 | 40190075 | 40190086 | 6       | .                  | .        | intergenic | .      | 143107 rs7928  | 2 |
| ACC.GGT     | 14 | 40204379 | 40204397 | 6.33333 | .                  | .        | intergenic | -0.386 | 339528 rs7872  | 3 |
| AAAC.GTTT   | 14 | 40406374 | 40406393 | 5       | .                  | .        | intergenic | 0.07   | 332376 rs7936  | 3 |
| AGC.GCT     | 14 | 40428174 | 40428186 | 4.33333 | .                  | .        | intergenic | -0.206 | .              | 2 |
| AC.GT       | 14 | 40624618 | 40624627 | 5       | ENSSSCT00000010816 | RBM19    | intron     | 0.223  | 353828 rs7893  | 2 |
| AAC.GTT     | 14 | 40758863 | 40758875 | 4.33333 | .                  | .        | intergenic | .      | 399829 rs7914  | 2 |
| AAAG.CTTT   | 14 | 41140437 | 41140459 | 5.75    | ENSSSCT00000010826 | IQCD     | promoter   | .      | rs792780690    | 2 |
| AG.CT       | 14 | 41178119 | 41178138 | 10      | ENSSSCT00000028773 | .        | intron     | -0.05  | rs702371938    | 2 |
| AC.GT       | 14 | 41197041 | 41197053 | 6.5     | ENSSSCT00000010831 | OAS2     | intron     | 0.011  | .              | 2 |
| AG.CT       | 14 | 41396191 | 41396202 | 6       | .                  | .        | intergenic | -0.162 | .              | 2 |
| AAAG.CTTT   | 14 | 41740851 | 41740875 | 6.25    | ENSSSCT00000030697 | PTPN11   | intron     | .      | rs787756673    | 2 |
| AAAT.ATTT   | 14 | 41802040 | 41802062 | 5.75    | .                  | .        | intergenic | 0.233  | rs706831724    | 2 |
| AAAT.ATTT   | 14 | 42047711 | 42047724 | 3.5     | ENSSSCT00000036207 | TRAFD1   | intron     | .      | rs793007621    | 2 |
| AATT.AATT   | 14 | 42246914 | 42246928 | 3.75    | ENSSSCT00000010843 | TMEM116  | intron     | .      | rs787524876    | 2 |
| AATG.CATT   | 14 | 42293366 | 42293396 | 7.75    | ENSSSCT00000010843 | TMEM116  | 3'utr      | 0.347  | rs786443693    | 2 |
| AC.GT       | 14 | 42714187 | 42714202 | 8       | ENSSSCT00000010848 | GCN1L1   | 3'utr      | 1.687  | rs787251512    | 4 |
| AC.GT       | 14 | 42714187 | 42714202 | 8       | ENSSSCT00000031208 | PLA2G1B  | intron     | 1.687  | rs787251512    | 4 |
| AAAAG.CTTTT | 14 | 42859192 | 42859214 | 3.83333 | .                  | .        | intergenic | .      | rs787301223    | 2 |
| AAG.CTT     | 14 | 43256748 | 43256767 | 6.66667 | ENSSSCT00000010867 | SPPL3    | intron     | 0.342  | 353217 rs7874  | 2 |
| AAG.CTT     | 14 | 43256748 | 43256767 | 6.66667 | ENSSSCT00000010868 | SPPL3    | intron     | 0.342  | 353217 rs7874  | 2 |
| AG.CT       | 14 | 43907937 | 43907948 | 6       | ENSSSCT00000010885 | UBE3B    | intron     | -0.162 | .              | 3 |
| AAAAC.GTTTT | 14 | 43915620 | 43915643 | 4.8     | ENSSSCT00000010885 | UBE3B    | intron     | -0.292 | rs792842594    | 2 |
| AATG.CATT   | 14 | 44190440 | 44190461 | 5.5     | ENSSSCT00000010889 | ACACB    | intron     | -0.214 | 105232 rs7868  | 2 |
| AAAC.GTTT   | 14 | 44274738 | 44274757 | 5       | .                  | .        | intergenic | 0.033  | rs786309900    | 2 |
| ACAT.ATGT   | 14 | 44437688 | 44437710 | 5.75    | ENSSSCT00000010893 | SVOP     | intron     | .      | 361055 rs7877  | 2 |
| AAAC.GTTT   | 14 | 44445092 | 44445111 | 5       | ENSSSCT00000010893 | SVOP     | intron     | -0.137 | rs793124446    | 2 |
| AAG.CTT     | 14 | 44469823 | 44469837 | 5       | .                  | .        | intergenic | 0.21   | rs788106308    | 2 |
| AC.GT       | 14 | 44529382 | 44529397 | 8       | ENSSSCT00000010895 | SSH1     | intron     | -0.261 | 143326 rs7883  | 2 |
| AAAT.ATTT   | 14 | 44619629 | 44619646 | 4.5     | .                  | .        | intergenic | 0.278  | rs786693161    | 2 |
| AAAAC.GTTTT | 14 | 44825679 | 44825698 | 4       | .                  | .        | intergenic | 0.38   | 172457 rs7894  | 2 |
| AGG.CCT     | 14 | 45178781 | 45178801 | 7       | ENSSSCT00000025264 | .        | cds        | 1.204  | .              | 2 |
| CATAT.ATATG | 14 | 45559715 | 45559733 | 3.16667 | .                  | .        | intergenic | .      | 179489 rs7888  | 2 |
| AAAAT.ATTTT | 14 | 45580927 | 45580948 | 4.4     | ENSSSCT00000010902 | PIWIL3   | intron     | 0.252  | 385741 rs7911  | 2 |
| AAAAT.ATTTT | 14 | 45580927 | 45580948 | 4.4     | ENSSSCT00000010901 | PIWIL3   | intron     | 0.252  | 385741 rs7911  | 2 |
| AG.CT       | 14 | 45711196 | 45711206 | 5.5     | .                  | .        | intergenic | 0.193  | rs792999089    | 2 |
| AAT.ATT     | 14 | 46087367 | 46087378 | 4       | .                  | .        | intergenic | 0.017  | rs791493530    | 2 |
| AT.AT       | 14 | 46120815 | 46120827 | 6.5     | .                  | .        | intergenic | 0.299  | rs793335668    | 2 |
| AGATG.CATCT | 14 | 46291799 | 46291828 | 6       | ENSSSCT00000010912 | MYO18B   | promoter   | 0.389  | rs788284879    | 2 |
| AG.CT       | 14 | 46672192 | 46672207 | 8       | .                  | .        | intergenic | -0.116 | .              | 2 |
| AGGG.CCCT   | 14 | 46730717 | 46730731 | 3.75    | .                  | .        | intergenic | -0.106 | rs792914076    | 2 |
| AG.CT       | 14 | 46878423 | 46878432 | 5       | ENSSSCT00000010913 | SEZ6L    | intron     | 0.838  | .              | 2 |
| ACAG.CTGT   | 14 | 47089193 | 47089219 | 6.75    | .                  | .        | intergenic | -0.401 | 144720 rs7916  | 2 |
| AG.CT       | 14 | 47186504 | 47186519 | 8       | .                  | .        | intergenic | 0.058  | rs790713086    | 2 |
| AAAAC.GTTTT | 14 | 47190251 | 47190270 | 4       | .                  | .        | intergenic | -0.432 | 348211 rs7868  | 2 |
| AAAT.ATTT   | 14 | 47242402 | 47242419 | 4.5     | .                  | .        | intergenic | -0.35  | 193714 rs7916  | 2 |
| AG.CT       | 14 | 47388628 | 47388642 | 7.5     | .                  | .        | intergenic | .      | 309771 rs7877  | 2 |
| AAAG.CTTT   | 14 | 47587267 | 47587281 | 3.75    | .                  | .        | intergenic | -0.17  | rs793127006    | 2 |
| AC.GT       | 14 | 47754732 | 47754746 | 7.5     | .                  | .        | intergenic | -0.041 | 332411 rs7937  | 2 |
| AC.GT       | 14 | 48195004 | 48195015 | 6       | .                  | .        | intergenic | .      | 180170 rs7893  | 4 |
| AC.GT       | 14 | 48470305 | 48470323 | 9.5     | ENSSSCT00000010924 | TTC28    | intron     | .      | .              | 2 |
| AAG.CTT     | 14 | 48797958 | 48797976 | 6.33333 | .                  | .        | intergenic | .      | rs786797027    | 2 |
| AAC.GTT     | 14 | 48906003 | 48906019 | 5.66667 | .                  | .        | intergenic | -0.046 | rs791950653    | 2 |
| AT.AT       | 14 | 48916516 | 48916526 | 5.5     | .                  | .        | intergenic | .      | .              | 2 |
| AAAAC.GTTTT | 14 | 49155954 | 49155976 | 4.6     | .                  | .        | intergenic | .      | rs793796845    | 2 |
| AAAAG.CTTTT | 14 | 49224464 | 49224481 | 3.6     | ENSSSCT00000010928 | KREMEN1  | intron     | 0.918  | 362256 rs7935  | 2 |
| AC.GT       | 14 | 49252594 | 49252608 | 7.5     | ENSSSCT00000010928 | KREMEN1  | intron     | 0.157  | .              | 2 |
| AAC.GTT     | 14 | 49279601 | 49279617 | 5.66667 | ENSSSCT00000010928 | KREMEN1  | intron     | 3.551  | rs791359179    | 2 |
| AG.CT       | 14 | 49659653 | 49659662 | 5       | ENSSSCT00000010945 | NIPSNAP1 | intron     | 0.961  | .              | 2 |
| AT.AT       | 14 | 50047974 | 50047994 | 10.5    | ENSSSCT00000010951 | MTMR3    | intron     | .      | .              | 2 |
| AG.CT       | 14 | 50049213 | 50049228 | 8       | ENSSSCT00000010951 | MTMR3    | intron     | 0.134  | .              | 3 |
| AAC.GTT     | 14 | 50107447 | 50107460 | 4.66667 | .                  | .        | intergenic | 0.327  | .              | 2 |
| AG.CT       | 14 | 51166637 | 51166648 | 6       | .                  | .        | intergenic | 0.368  | .              | 2 |
| AAAT.ATTT   | 14 | 51300782 | 51300799 | 4.5     | ENSSSCT00000010986 | DRG1     | intron     | .      | rs791167560    | 2 |
| AAAC.GTTT   | 14 | 51733380 | 51733403 | 6       | ENSSSCT00000010991 | DEPDC5   | intron     | .      | 200311 rs7923  | 2 |
| AAAAT.ATTTT | 14 | 52149971 | 52149987 | 3.4     | .                  | .        | intergenic | 0.116  | 307926 rs7868  | 2 |
| AAAC.GTTT   | 14 | 52263311 | 52263335 | 6.25    | .                  | .        | intergenic | -0.344 | 309737 rs7924  | 2 |
| AC.GT       | 14 | 53392097 | 53392119 | 11.5    | .                  | .        | intergenic | .      | rs790645052    | 2 |
| AAT.ATT     | 14 | 53997385 | 53997401 | 5.66667 | ENSSSCT00000011056 | CRKL     | intron     | 0.196  | rs792322926    | 2 |
| AAAAC.GTTTT | 14 | 54660068 | 54660091 | 4.8     | .                  | .        | intergenic | 0.254  | 1709429 rs7913 | 2 |
| AG.CT       | 14 | 55466834 | 55466843 | 5       | .                  | .        | intergenic | -0.295 | .              | 2 |

|               |    |          |          |         |                    |          |            |        |               |   |
|---------------|----|----------|----------|---------|--------------------|----------|------------|--------|---------------|---|
| AAAAC.GTTTT   | 14 | 55561108 | 55561129 | 4.4     | .                  | .        | intergenic | -0.019 | 334216 rs7927 | 2 |
| AAAG.CTTT     | 14 | 55617123 | 55617141 | 4.75    | .                  | .        | intergenic | -0.397 | 03832 rs7924  | 2 |
| AT.AT         | 14 | 55629490 | 55629499 | 5       | .                  | .        | intergenic | 0.003  | rs786774931   | 2 |
| AAAT.ATTT     | 14 | 55895676 | 55895691 | 4       | .                  | .        | intergenic | -0.365 | 011153 rs7889 | 2 |
| AAC.GTT       | 14 | 55949181 | 55949197 | 5.66667 | .                  | .        | intergenic | -0.158 | .             | 2 |
| AAC.GTT       | 14 | 55951230 | 55951246 | 5.66667 | .                  | .        | intergenic | -0.122 | rs793024995   | 2 |
| AAAAC.GTTT    | 14 | 56118621 | 56118637 | 4.25    | .                  | .        | intergenic | 0.026  | rs787524929   | 2 |
| AT.AT         | 14 | 56261061 | 56261072 | 6       | .                  | .        | intergenic | -0.145 | .             | 2 |
| AC.GT         | 14 | 56382889 | 56382898 | 5       | .                  | .        | intergenic | -0.167 | rs790903453   | 3 |
| AT.AT         | 14 | 56461715 | 56461732 | 9       | .                  | .        | intergenic | -0.068 | rs792627774   | 2 |
| AAG.CTT       | 14 | 56463037 | 56463050 | 4.66667 | .                  | .        | intergenic | -0.092 | rs789512375   | 2 |
| AAAAC.GTTT    | 14 | 56604111 | 56604127 | 4.25    | .                  | .        | intergenic | 0.029  | rs786657623   | 2 |
| AAAAC.GTTT    | 14 | 57373211 | 57373222 | 3       | .                  | .        | intergenic | .      | .             | 2 |
| AATG.CATT     | 14 | 57479662 | 57479681 | 5       | .                  | .        | intergenic | -0.074 | rs786286746   | 2 |
| AT.AT         | 14 | 57607025 | 57607037 | 6.5     | ENSSSCT00000011103 | RYR2     | intron     | .      | 363039 rs7937 | 4 |
| AAC.GTT       | 14 | 57736288 | 57736304 | 5.66667 | ENSSSCT00000011103 | RYR2     | intron     | -0.233 | rs787859271   | 2 |
| AT.AT         | 14 | 57785478 | 57785489 | 6       | ENSSSCT00000011103 | RYR2     | intron     | -0.174 | rs790185061   | 2 |
| AAAAT.ATTTT   | 14 | 57793380 | 57793403 | 4.8     | ENSSSCT00000011103 | RYR2     | intron     | -0.208 | 731952 rs7930 | 2 |
| AC.GT         | 14 | 57806744 | 57806758 | 7.5     | ENSSSCT00000011103 | RYR2     | intron     | -0.398 | .             | 4 |
| AC.GT         | 14 | 58004232 | 58004242 | 5.5     | .                  | .        | intergenic | -0.167 | rs792604062   | 2 |
| AT.AT         | 14 | 58324508 | 58324518 | 5.5     | .                  | .        | intergenic | .      | rs787725610   | 2 |
| AAAAT.ATTTT   | 14 | 58382575 | 58382595 | 4.2     | .                  | .        | intergenic | 0.133  | rs792053458   | 2 |
| AG.CT         | 14 | 58587129 | 58587147 | 9.5     | ENSSSCT00000011105 | MTR      | intron     | 0.347  | rs787918567   | 2 |
| AG.CT         | 14 | 58598233 | 58598243 | 5.5     | ENSSSCT00000011105 | MTR      | intron     | -0.104 | rs792269431   | 2 |
| AAAAC.GTTT    | 14 | 58629044 | 58629058 | 3.75    | .                  | .        | intergenic | 0.289  | 325766 rs7878 | 2 |
| AG.CT         | 14 | 58911423 | 58911443 | 10.5    | ENSSSCT00000030665 | EDARADD  | intron     | 0.145  | rs788693512   | 2 |
| ATCC.GGAT     | 14 | 58936981 | 58937003 | 5.75    | ENSSSCT00000030665 | EDARADD  | intron     | 0.004  | 317874 rs7915 | 2 |
| AAAAG.CTTTT   | 14 | 59080753 | 59080769 | 3.4     | ENSSSCT00000011111 | ERO1LB   | promoter   | 0.008  | 312501 rs7912 | 2 |
| AAAG.CTTT     | 14 | 59264227 | 59264249 | 5.75    | ENSSSCT00000011112 | .        | intron     | .      | 786373 rs7862 | 3 |
| AAAG.CTTT     | 14 | 59264227 | 59264249 | 5.75    | ENSSSCT00000011114 | .        | intron     | .      | 786373 rs7862 | 3 |
| AAAAC.GTTT    | 14 | 59280607 | 59280618 | 3       | ENSSSCT00000011112 | .        | intron     | .      | rs789456907   | 2 |
| AAAAC.GTTT    | 14 | 59280607 | 59280618 | 3       | ENSSSCT00000011114 | .        | intron     | .      | rs789456907   | 2 |
| AAAT.ATTT     | 14 | 59292865 | 59292883 | 4.75    | ENSSSCT00000011112 | .        | intron     | -0.134 | rs789541292   | 2 |
| AAAAC.GTTT    | 14 | 59526486 | 59526502 | 4.25    | .                  | .        | intergenic | 0.093  | rs792408674   | 2 |
| AC.GT         | 14 | 59661432 | 59661446 | 7.5     | ENSSSCT00000011115 | LYST     | intron     | 0.169  | 382102 rs7932 | 2 |
| AT.AT         | 14 | 59696807 | 59696817 | 5.5     | .                  | .        | intergenic | -0.097 | rs786306465   | 2 |
| AAG.CTT       | 14 | 59808750 | 59808763 | 4.66667 | .                  | .        | intergenic | .      | 345200 rs7897 | 2 |
| AAAAC.GTTT    | 14 | 59845277 | 59845306 | 7.5     | .                  | .        | intergenic | -0.007 | 292281 rs7909 | 2 |
| AC.GT         | 14 | 60014694 | 60014711 | 9       | .                  | .        | intergenic | .      | .             | 2 |
| AAAT.ATTT     | 14 | 60093206 | 60093224 | 4.75    | ENSSSCT00000011120 | ARID4B   | intron     | 1.154  | rs787868089   | 2 |
| AT.AT         | 14 | 60642261 | 60642297 | 18.5    | .                  | .        | intergenic | .      | rs792712968   | 2 |
| AAAG.CTTT     | 14 | 60698437 | 60698453 | 4.25    | .                  | .        | intergenic | 0.32   | rs789424707   | 2 |
| AAAAG.CTTTT   | 14 | 60796641 | 60796663 | 4.6     | ENSSSCT00000011124 | TARBP1   | intron     | 0.188  | 359279 rs7913 | 2 |
| AG.CT         | 14 | 60818495 | 60818507 | 6.5     | .                  | .        | intergenic | 0.267  | .             | 2 |
| AT.AT         | 14 | 60886581 | 60886602 | 11      | ENSSSCT00000011127 | SLC35F3  | intron     | .      | rs792321760   | 2 |
| AC.GT         | 14 | 60886985 | 60886997 | 6.5     | ENSSSCT00000011127 | SLC35F3  | intron     | -0.011 | rs789536151   | 2 |
| AAAT.ATTT     | 14 | 60922251 | 60922273 | 5.75    | ENSSSCT00000011127 | SLC35F3  | intron     | -0.136 | rs786274974   | 2 |
| AAAAG.CTTTT   | 14 | 60967650 | 60967674 | 5       | .                  | .        | intergenic | -0.073 | rs789105536   | 2 |
| ACCT.AGGT     | 14 | 61088156 | 61088186 | 7.75    | .                  | .        | intergenic | 0.046  | 799633 rs7897 | 2 |
| AT.AT         | 14 | 61107249 | 61107259 | 5.5     | .                  | .        | intergenic | -0.257 | rs786726686   | 3 |
| AT.AT         | 14 | 61400723 | 61400734 | 6       | .                  | .        | intergenic | 0.15   | rs787819139   | 2 |
| AG.CT         | 14 | 61585177 | 61585193 | 8.5     | .                  | .        | intergenic | .      | .             | 3 |
| AAC.GTT       | 14 | 61607126 | 61607139 | 4.66667 | ENSSSCT00000011130 | .        | intron     | -0.144 | rs789533263   | 3 |
| AC.GT         | 14 | 61858659 | 61858682 | 12      | ENSSSCT00000026272 | PCNXL2   | intron     | .      | rs790514914   | 2 |
| AC.GT         | 14 | 61858659 | 61858682 | 12      | ENSSSCT00000011131 | PCNXL2   | intron     | .      | rs790514914   | 2 |
| AC.GT         | 14 | 62053365 | 62053375 | 5.5     | .                  | .        | intergenic | 0.054  | .             | 2 |
| AAAATT.AATTTT | 14 | 62297429 | 62297459 | 5.16667 | .                  | .        | intergenic | -0.033 | .             | 2 |
| AATT.AATT     | 14 | 62299697 | 62299709 | 3.25    | .                  | .        | intergenic | -0.02  | rs791026695   | 2 |
| AAAAC.GTTT    | 14 | 63624089 | 63624112 | 6       | .                  | .        | intergenic | .      | rs792424976   | 2 |
| AAAT.ATTT     | 14 | 63908512 | 63908533 | 5.5     | ENSSSCT00000011142 | C1orf131 | intron     | -0.12  | 222599 rs7896 | 2 |
| AC.GT         | 14 | 64356815 | 64356828 | 7       | ENSSSCT00000011149 | COG2     | intron     | -0.132 | 147338 rs7913 | 2 |
| AC.GT         | 14 | 64514633 | 64514656 | 12      | .                  | .        | intergenic | 0.12   | 329451 rs7895 | 2 |
| AAAAC.GTTTT   | 14 | 64702165 | 64702185 | 4.2     | .                  | .        | intergenic | .      | rs789287231   | 2 |
| AC.GT         | 14 | 64912818 | 64912832 | 7.5     | ENSSSCT00000011151 | GALNT2   | intron     | -0.189 | rs789489793   | 2 |
| AAAAC.GTTTT   | 14 | 65140502 | 65140530 | 5.8     | ENSSSCT00000011154 | ABCB10   | intron     | .      | rs787373638   | 2 |
| AC.GT         | 14 | 65552838 | 65552850 | 6.5     | .                  | .        | intergenic | 0.116  | rs791210534   | 2 |
| ATC.GAT       | 14 | 65565541 | 65565559 | 6.33333 | .                  | .        | intergenic | .      | .             | 2 |
| AAAAC.CTTT    | 14 | 65653747 | 65653761 | 3.75    | ENSSSCT00000023762 | ZNF33B   | intron     | .      | rs789057917   | 2 |
| AAAAC.GTTTT   | 14 | 65818104 | 65818129 | 4.33333 | ENSSSCT00000011162 | .        | intron     | .      | 328826 rs7872 | 2 |
| AT.AT         | 14 | 66111694 | 66111718 | 12.5    | .                  | .        | intergenic | 0.093  | 195140 rs7883 | 3 |
| AAAAC.GTTT    | 14 | 66118693 | 66118717 | 6.25    | .                  | .        | intergenic | 0.167  | 075810 rs7877 | 2 |
| AAAAC.GTTT    | 14 | 66217529 | 66217548 | 5       | ENSSSCT00000011166 | SGALNAC1 | intron     | 0.284  | 364553 rs7874 | 2 |
| AGAT.ATCT     | 14 | 66240465 | 66240484 | 5       | ENSSSCT00000011166 | SGALNAC1 | intron     | 0.17   | 382214 rs7899 | 2 |
| AAG.CTT       | 14 | 66405489 | 66405512 | 8       | .                  | .        | intergenic | .      | rs788739417   | 4 |
| AAAT.ATTT     | 14 | 67031394 | 67031411 | 4.5     | .                  | .        | intergenic | 0.011  | .             | 2 |
| AAC.GTT       | 14 | 67463260 | 67463275 | 5.33333 | .                  | .        | intergenic | .      | rs787408063   | 2 |
| AAAAC.GTTTT   | 14 | 67465040 | 67465065 | 4.33333 | .                  | .        | intergenic | 0.124  | .             | 2 |
| AAAT.ATTT     | 14 | 67497612 | 67497623 | 3       | .                  | .        | intergenic | 0.952  | 245449 rs7878 | 2 |
| ATC.GAT       | 14 | 67502697 | 67502712 | 5.33333 | ENSSSCT00000011175 | FAM13C   | intron     | 0.186  | 358724 rs7871 | 2 |
| AG.CT         | 14 | 67702152 | 67702163 | 6       | .                  | .        | intergenic | -0.13  | rs787404107   | 2 |
| AAAAT.ATTTT   | 14 | 67746438 | 67746465 | 5.6     | .                  | .        | intergenic | .      | rs787011245   | 2 |
| AC.GT         | 14 | 68353956 | 68353968 | 6.5     | .                  | .        | intergenic | .      | 203044 rs7867 | 3 |
| ATCC.GGAT     | 14 | 68565028 | 68565055 | 7       | ENSSSCT00000035859 | ANK3     | intron     | 1.869  | rs793886336   | 2 |
| ATCC.GGAT     | 14 | 68565028 | 68565055 | 7       | ENSSSCT00000033954 | ANK3     | intron     | 1.869  | rs793886336   | 2 |

|              |    |          |          |         |                    |         |            |        |               |   |
|--------------|----|----------|----------|---------|--------------------|---------|------------|--------|---------------|---|
| ATCC.GGAT    | 14 | 68565028 | 68565055 | 7       | ENSSSCT00000011178 | ANK3    | intron     | 1.869  | rs793886336   | 2 |
| ATCC.GGAT    | 14 | 68565028 | 68565055 | 7       | ENSSSCT00000034950 | ANK3    | intron     | 1.869  | rs793886336   | 2 |
| AC.GT        | 14 | 68576094 | 68576115 | 11      | ENSSSCT00000035859 | ANK3    | intron     | -0.097 | .             | 4 |
| AC.GT        | 14 | 68576094 | 68576115 | 11      | ENSSSCT00000033954 | ANK3    | intron     | -0.097 | .             | 4 |
| AC.GT        | 14 | 68576094 | 68576115 | 11      | ENSSSCT00000011178 | ANK3    | intron     | -0.097 | .             | 4 |
| AC.GT        | 14 | 68576094 | 68576115 | 11      | ENSSSCT00000034950 | ANK3    | intron     | -0.097 | .             | 4 |
| AAGG.CCTT    | 14 | 68842892 | 68842918 | 6.75    | .                  | .       | intergenic | 0.014  | 305094 rs7886 | 2 |
| AAC.GTT      | 14 | 68922243 | 68922260 | 6       | .                  | .       | intergenic | 0.123  | rs792992330   | 2 |
| AAAAC.GTTTT  | 14 | 68991509 | 68991529 | 4.2     | .                  | .       | intergenic | 0.205  | rs790618478   | 2 |
| AAAT.ATTT    | 14 | 69033177 | 69033194 | 4.5     | .                  | .       | intergenic | -0.066 | rs786709721   | 3 |
| AC.GT        | 14 | 69034895 | 69034919 | 12.5    | .                  | .       | intergenic | .      | 206841 rs7910 | 3 |
| AAC.GTT      | 14 | 69050442 | 69050455 | 4.66667 | .                  | .       | intergenic | 0.244  | rs787770105   | 2 |
| AC.GT        | 14 | 69090986 | 69090996 | 5.5     | .                  | .       | intergenic | .      | .             | 2 |
| AAAAC.GTTTT  | 14 | 69537438 | 69537466 | 5.8     | .                  | .       | intergenic | -0.017 | rs786340202   | 2 |
| AAAT.ATTT    | 14 | 69679552 | 69679569 | 4.5     | .                  | .       | intergenic | -0.09  | 12970 rs7938  | 2 |
| AAAAT.ATTTT  | 14 | 69814080 | 69814098 | 3.8     | .                  | .       | intergenic | 0.098  | 720916 rs7902 | 2 |
| AT.AT        | 14 | 69852533 | 69852543 | 5.5     | .                  | .       | intergenic | 0.489  | rs791015605   | 2 |
| AAAT.ATTT    | 14 | 69933898 | 69933918 | 5.25    | .                  | .       | intergenic | -0.104 | .             | 2 |
| AG.CT        | 14 | 70234861 | 70234871 | 5.5     | .                  | .       | intergenic | .      | rs789031676   | 2 |
| AC.GT        | 14 | 70253450 | 70253462 | 6.5     | .                  | .       | intergenic | 0.141  | rs792916873   | 3 |
| AC.GT        | 14 | 70407149 | 70407161 | 6.5     | .                  | .       | intergenic | .      | 365633 rs7934 | 2 |
| AAG.CTT      | 14 | 70573041 | 70573057 | 5.66667 | .                  | .       | intergenic | -0.134 | 240374 rs7933 | 2 |
| AAAC.GTTT    | 14 | 70720505 | 70720525 | 5.25    | .                  | .       | intergenic | .      | 344143 rs7866 | 2 |
| AT.AT        | 14 | 70930847 | 70930864 | 9       | .                  | .       | intergenic | .      | rs790855693   | 2 |
| AT.AT        | 14 | 70938686 | 70938696 | 5.5     | ENSSSCT00000011188 | ZNF365  | intron     | 0.288  | rs787896863   | 2 |
| AATG.CATT    | 14 | 71284906 | 71284934 | 7.25    | .                  | .       | intergenic | 0.04   | rs788248513   | 2 |
| AAAAC.GTTTT  | 14 | 71326612 | 71326645 | 6.8     | .                  | .       | intergenic | 0.11   | 341555 rs7895 | 2 |
| AT.AT        | 14 | 71651129 | 71651138 | 5       | .                  | .       | intergenic | .      | .             | 2 |
| AC.GT        | 14 | 71659411 | 71659421 | 5.5     | .                  | .       | intergenic | -0.11  | rs792978989   | 2 |
| AAAT.ATTT    | 14 | 71743493 | 71743514 | 5.5     | .                  | .       | intergenic | .      | rs790387962   | 2 |
| AC.GT        | 14 | 71828414 | 71828423 | 5       | .                  | .       | intergenic | 0.273  | rs790775511   | 3 |
| AAAT.ATTT    | 14 | 71896763 | 71896787 | 6.25    | ENSSSCT00000011192 | JMJD1C  | intron     | 3.567  | 362750 rs7938 | 2 |
| AAAAC.GTTTT  | 14 | 71973501 | 71973531 | 5.16667 | .                  | .       | intergenic | 0.152  | 303473 rs7862 | 2 |
| AAAAC.GTTTT  | 14 | 72022208 | 72022231 | 4       | .                  | .       | intergenic | .      | .             | 2 |
| AAAC.GTTT    | 14 | 72143776 | 72143804 | 7.25    | .                  | .       | intergenic | .      | rs790150268   | 2 |
| AAAC.GTTT    | 14 | 72328157 | 72328180 | 6       | .                  | .       | intergenic | 0.054  | rs788443623   | 2 |
| AC.GT        | 14 | 72377526 | 72377540 | 7.5     | .                  | .       | intergenic | 0.355  | 289795 rs7936 | 2 |
| AG.CT        | 14 | 72589187 | 72589210 | 12      | .                  | .       | intergenic | 0.344  | rs791874533   | 3 |
| AT.AT        | 14 | 72623243 | 72623252 | 5       | .                  | .       | intergenic | .      | rs786352749   | 3 |
| AC.GT        | 14 | 72627660 | 72627672 | 6.5     | .                  | .       | intergenic | 0.128  | rs788346881   | 2 |
| AAT.ATT      | 14 | 72901475 | 72901493 | 6.33333 | .                  | .       | intergenic | -0.18  | .             | 2 |
| AC.GT        | 14 | 72935348 | 72935358 | 5.5     | .                  | .       | intergenic | 0.02   | rs787738198   | 4 |
| AC.GT        | 14 | 72954610 | 72954623 | 7       | .                  | .       | intergenic | .      | rs788446582   | 2 |
| AATAT.ATATT  | 14 | 73028434 | 73028449 | 3.2     | .                  | .       | intergenic | .      | 358431 rs7893 | 2 |
| AAC.GTT      | 14 | 73144093 | 73144105 | 4.33333 | .                  | .       | intergenic | .      | .             | 2 |
| AAAAC.GTTTT  | 14 | 73191458 | 73191500 | 8.6     | .                  | .       | intergenic | .      | 181302 rs7862 | 2 |
| AAAC.GTTT    | 14 | 73354317 | 73354334 | 4.5     | .                  | .       | intergenic | 0.045  | rs790456899   | 4 |
| AT.AT        | 14 | 73472766 | 73472792 | 13.5    | .                  | .       | intergenic | .      | 247343 rs7913 | 2 |
| ACCT.AGGT    | 14 | 73511764 | 73511783 | 5       | .                  | .       | intergenic | 0.423  | rs789465383   | 2 |
| AAC.GTT      | 14 | 73545303 | 73545323 | 7       | .                  | .       | intergenic | 0.018  | 384399 rs7915 | 2 |
| AAAT.ATTT    | 14 | 73644145 | 73644165 | 5.25    | .                  | .       | intergenic | 0.06   | .             | 2 |
| AAAT.ATTT    | 14 | 73659194 | 73659212 | 4.75    | .                  | .       | intergenic | .      | rs792268086   | 2 |
| AAAC.GTTT    | 14 | 73669069 | 73669081 | 3.25    | .                  | .       | intergenic | .      | 378525 rs7928 | 2 |
| AT.AT        | 14 | 73814234 | 73814244 | 5.5     | .                  | .       | intergenic | 0.15   | rs790273431   | 2 |
| AT.AT        | 14 | 74224832 | 74224842 | 5.5     | .                  | .       | intergenic | .      | rs789960881   | 2 |
| ACATAT.ATATG | 14 | 74301281 | 74301307 | 4.5     | .                  | .       | intergenic | -0.063 | rs791649817   | 2 |
| AC.GT        | 14 | 74988612 | 74988622 | 5.5     | .                  | .       | intergenic | .      | .             | 2 |
| AC.GT        | 14 | 75387469 | 75387502 | 17      | .                  | .       | intergenic | 0.276  | .             | 2 |
| AAAAC.GTTTT  | 14 | 75581200 | 75581218 | 3.8     | .                  | .       | intergenic | 0.174  | rs788113688   | 2 |
| AAAAC.GTTTT  | 14 | 75634451 | 75634469 | 3.8     | .                  | .       | intergenic | 0.051  | rs791234685   | 2 |
| AG.CT        | 14 | 75763495 | 75763508 | 7       | .                  | .       | intergenic | 0.391  | .             | 4 |
| AAAT.ATTT    | 14 | 75833610 | 75833632 | 5.75    | .                  | .       | intergenic | -0.045 | 153304 rs7873 | 2 |
| AAAC.GTTT    | 14 | 75977367 | 75977393 | 6.75    | .                  | .       | intergenic | 0.006  | 360376 rs7915 | 2 |
| AAAC.GTTT    | 14 | 76016891 | 76016905 | 3.75    | .                  | .       | intergenic | 0.105  | rs791761972   | 2 |
| AAAT.ATTT    | 14 | 76034957 | 76034976 | 5       | .                  | .       | intergenic | -0.209 | rs786710025   | 2 |
| AG.CT        | 14 | 76048170 | 76048181 | 6       | .                  | .       | intergenic | -0.123 | rs792597052   | 3 |
| AAAAG.CTTTT  | 14 | 76280556 | 76280572 | 3.4     | .                  | .       | intergenic | 0.227  | rs790739385   | 2 |
| AT.AT        | 14 | 76388256 | 76388265 | 5       | .                  | .       | intergenic | 0.282  | rs791383088   | 2 |
| AT.AT        | 14 | 76418829 | 76418839 | 5.5     | .                  | .       | intergenic | .      | .             | 3 |
| AAACC.GGTTT  | 14 | 76830991 | 76831011 | 3.5     | .                  | .       | intergenic | 0.167  | rs792699909   | 2 |
| AAC.GTT      | 14 | 77057385 | 77057396 | 4       | ENSSSCT00000011202 | SIRT1   | intron     | 0.154  | rs791570588   | 2 |
| AAT.ATT      | 14 | 78398506 | 78398521 | 5.33333 | ENSSSCT00000024082 | .       | promoter   | -0.157 | rs786501554   | 2 |
| AAAT.ATTT    | 14 | 78404085 | 78404103 | 4.75    | ENSSSCT00000024082 | .       | intron     | -0.096 | rs791726745   | 2 |
| AAAAC.GTTTT  | 14 | 78434191 | 78434211 | 4.2     | ENSSSCT00000024082 | .       | intron     | -0.206 | rs787640133   | 3 |
| AC.GT        | 14 | 78864023 | 78864033 | 5.5     | ENSSSCT00000011226 | COL13A1 | intron     | -0.035 | rs791780673   | 2 |
| AAAAT.ATTTT  | 14 | 79005244 | 79005264 | 4.2     | ENSSSCT00000011229 | TYSND1  | intron     | -0.131 | rs790493403   | 2 |
| AAAAG.CTTTT  | 14 | 79032162 | 79032181 | 4       | .                  | .       | intergenic | 0.175  | 146658 rs7901 | 2 |
| AAATG.CATTT  | 14 | 79034210 | 79034227 | 3.6     | .                  | .       | intergenic | .      | rs793203243   | 2 |
| AT.AT        | 14 | 79398856 | 79398867 | 6       | .                  | .       | intergenic | .      | rs787087365   | 2 |
| AC.GT        | 14 | 79712021 | 79712037 | 8.5     | .                  | .       | intergenic | -0.111 | 370206 rs7920 | 3 |
| AT.AT        | 14 | 79793432 | 79793443 | 6       | .                  | .       | intergenic | -0.113 | rs791656049   | 2 |
| AC.GT        | 14 | 79811844 | 79811859 | 8       | .                  | .       | intergenic | -0.164 | 189485 rs7893 | 2 |
| AC.GT        | 14 | 79840980 | 79841002 | 11.5    | .                  | .       | intergenic | .      | rs791496715   | 3 |
| AC.GT        | 14 | 79915906 | 79915917 | 6       | .                  | .       | intergenic | -0.157 | rs789999213   | 4 |

|             |    |          |          |         |                    |         |            |        |                 |   |
|-------------|----|----------|----------|---------|--------------------|---------|------------|--------|-----------------|---|
| AAAT.ATTT   | 14 | 79988084 | 79988111 | 7       | .                  | .       | intergenic | .      | rs791069397     | 4 |
| AC.GT       | 14 | 80073785 | 80073795 | 5.5     | ENSSSCT00000011248 | UNC5B   | intron     | -0.11  | rs692948756     | 2 |
| AC.GT       | 14 | 80707962 | 80707976 | 7.5     | .                  | .       | intergenic | .      | rs790974054     | 2 |
| AAAC.GTTT   | 14 | 80980447 | 80980474 | 7       | .                  | .       | intergenic | 0.092  | rs792662472     | 2 |
| AAT.ATT     | 14 | 81297619 | 81297641 | 7.66667 | ENSSSCT00000011261 | MICU1   | intron     | .      | rs48308 rs7879  | 2 |
| AAAAT.ATTTT | 14 | 81327175 | 81327190 | 3.2     | ENSSSCT00000011261 | MICU1   | intron     | 0.169  | rs301147 rs7889 | 2 |
| AAAAT.ATTTT | 14 | 81384252 | 81384270 | 3.8     | ENSSSCT00000011261 | MICU1   | intron     | 0.445  | rs791916371     | 2 |
| AC.GT       | 14 | 81571230 | 81571253 | 12      | .                  | .       | intergenic | .      | rs793880295     | 2 |
| AT.AT       | 14 | 82266813 | 82266825 | 6.5     | ENSSSCT00000011271 | TTC18   | intron     | 0.321  | rs356485 rs7914 | 2 |
| AT.AT       | 14 | 82266813 | 82266825 | 6.5     | ENSSSCT00000022350 | TTC18   | intron     | 0.321  | rs356485 rs7914 | 2 |
| AAAT.ATTT   | 14 | 82382897 | 82382908 | 3       | ENSSSCT00000036513 | PPP3CB  | intron     | 0.744  | .               | 2 |
| AAAT.ATTT   | 14 | 82382897 | 82382908 | 3       | ENSSSCT00000011274 | PPP3CB  | intron     | 0.744  | .               | 2 |
| AAAT.ATTT   | 14 | 82382897 | 82382908 | 3       | ENSSSCT00000035011 | PPP3CB  | intron     | 0.744  | .               | 2 |
| AAAT.ATTT   | 14 | 82382897 | 82382908 | 3       | ENSSSCT00000035106 | PPP3CB  | intron     | 0.744  | .               | 2 |
| AAC.GTT     | 14 | 82410716 | 82410730 | 5       | ENSSSCT00000011274 | PPP3CB  | intron     | 0.495  | rs709062871     | 4 |
| AAC.GTT     | 14 | 82410716 | 82410730 | 5       | ENSSSCT00000035011 | PPP3CB  | intron     | 0.495  | rs709062871     | 4 |
| AAC.GTT     | 14 | 82410716 | 82410730 | 5       | ENSSSCT00000035106 | PPP3CB  | intron     | 0.495  | rs709062871     | 4 |
| AAC.GTT     | 14 | 82410716 | 82410730 | 5       | ENSSSCT00000035374 | PPP3CB  | intron     | 0.495  | rs709062871     | 4 |
| AAC.GTT     | 14 | 82410716 | 82410730 | 5       | ENSSSCT00000036513 | PPP3CB  | intron     | 0.495  | rs709062871     | 4 |
| AG.CT       | 14 | 82436676 | 82436685 | 5       | ENSSSCT00000011275 | USP54   | intron     | 0.199  | .               | 2 |
| AG.CT       | 14 | 82772844 | 82772853 | 5       | .                  | .       | intergenic | .      | .               | 2 |
| AC.GT       | 14 | 82867954 | 82867967 | 7       | ENSSSCT00000011290 | VCL     | intron     | .      | .               | 2 |
| AC.GT       | 14 | 82867954 | 82867967 | 7       | ENSSSCT00000011289 | VCL     | intron     | .      | .               | 2 |
| AAC.GTT     | 14 | 83043173 | 83043188 | 5.33333 | ENSSSCT00000011292 | ADK     | intron     | .      | rs282633 rs7875 | 2 |
| AAAAT.ATTTT | 14 | 83119341 | 83119359 | 3.8     | ENSSSCT00000011292 | ADK     | intron     | .      | rs792265150     | 2 |
| AAAG.CTTT   | 14 | 83161330 | 83161359 | 7.5     | ENSSSCT00000011292 | ADK     | intron     | .      | rs789807553     | 2 |
| AT.AT       | 14 | 83462665 | 83462686 | 11      | .                  | .       | intergenic | .      | .               | 2 |
| AG.CT       | 14 | 83580890 | 83580904 | 7.5     | ENSSSCT00000011293 | KAT6B   | intron     | 0.33   | rs792704379     | 4 |
| AG.CT       | 14 | 83580890 | 83580904 | 7.5     | ENSSSCT00000019986 | .       | promoter   | 0.33   | rs792704379     | 4 |
| AAT.ATT     | 14 | 83954144 | 83954155 | 4       | .                  | .       | intergenic | .      | rs788329588     | 2 |
| AAAT.ATTT   | 14 | 84154335 | 84154349 | 3.75    | .                  | .       | intergenic | .      | rs792859739     | 2 |
| AAAC.GTTT   | 14 | 84181988 | 84182006 | 4.75    | .                  | .       | intergenic | .      | rs368371 rs7899 | 2 |
| AAAT.ATTT   | 14 | 84456708 | 84456725 | 4.5     | .                  | .       | intergenic | 0.591  | rs793793518     | 2 |
| AG.CT       | 14 | 85430208 | 85430217 | 5       | .                  | .       | intergenic | .      | rs787602118     | 2 |
| AC.GT       | 14 | 85642623 | 85642635 | 6.5     | .                  | .       | intergenic | -0.234 | rs789192341     | 2 |
| AC.GT       | 14 | 85808100 | 85808115 | 8       | ENSSSCT00000011303 | .       | intron     | .      | rs789242773     | 4 |
| ACCCC.GGGGT | 14 | 85815230 | 85815244 | 3       | ENSSSCT00000011303 | .       | intron     | -0.066 | rs787352680     | 2 |
| AG.CT       | 14 | 85869613 | 85869622 | 5       | ENSSSCT00000011303 | .       | intron     | 0.102  | rs789742298     | 2 |
| AAC.GTT     | 14 | 86020799 | 86020813 | 5       | .                  | .       | intergenic | .      | rs793036972     | 3 |
| AAC.GTT     | 14 | 86179042 | 86179053 | 4       | .                  | .       | intergenic | 0.034  | rs789643678     | 2 |
| AT.AT       | 14 | 86202923 | 86202933 | 5.5     | .                  | .       | intergenic | -0.16  | rs792994569     | 2 |
| AAAAC.GTTTT | 14 | 86379296 | 86379312 | 3.4     | .                  | .       | intergenic | 0.097  | rs789560223     | 2 |
| AC.GT       | 14 | 86490041 | 86490053 | 6.5     | .                  | .       | intergenic | -0.077 | .               | 4 |
| AATC.GATT   | 14 | 86629343 | 86629364 | 5.5     | .                  | .       | intergenic | -0.133 | rs793681674     | 2 |
| AG.CT       | 14 | 86717625 | 86717637 | 6.5     | .                  | .       | intergenic | 0.366  | rs786712708     | 2 |
| ACAT.ATGT   | 14 | 86965671 | 86965706 | 9       | ENSSSCT00000011305 | POLR3A  | intron     | 0.071  | rs793750 rs7902 | 3 |
| AATG.CATT   | 14 | 87191553 | 87191594 | 10.5    | .                  | .       | intergenic | -0.142 | rs787971159     | 2 |
| AAAT.ATTT   | 14 | 87508699 | 87508713 | 3.75    | .                  | .       | intergenic | 0.709  | rs193187 rs7917 | 2 |
| AAAT.ATTT   | 14 | 87594018 | 87594032 | 3.75    | .                  | .       | intergenic | 0.123  | .               | 2 |
| AC.GT       | 14 | 87806828 | 87806840 | 6.5     | .                  | .       | intergenic | 0.037  | rs791710585     | 2 |
| AAGC.GCTT   | 14 | 87927799 | 87927810 | 3       | .                  | .       | intergenic | -0.267 | rs790076155     | 2 |
| AACC.GGTT   | 14 | 87984439 | 87984450 | 3       | .                  | .       | intergenic | -0.249 | .               | 2 |
| AAAT.ATTT   | 14 | 88080627 | 88080658 | 8       | ENSSSCT00000011307 | .       | intron     | -0.177 | rs791491388     | 2 |
| AT.AT       | 14 | 88133434 | 88133444 | 5.5     | ENSSSCT00000011307 | .       | intron     | -0.182 | .               | 3 |
| AATG.CATT   | 14 | 88314988 | 88315019 | 8       | .                  | .       | intergenic | -0.036 | rs788717088     | 2 |
| AAAC.GTTT   | 14 | 88549551 | 88549565 | 3.75    | ENSSSCT00000028444 | TMEM254 | intron     | 0.238  | rs165662 rs7879 | 2 |
| AAAC.GTTT   | 14 | 88589639 | 88589655 | 4.25    | .                  | .       | intergenic | .      | rs787093511     | 2 |
| AAAC.GTTT   | 14 | 88790306 | 88790320 | 3.75    | ENSSSCT00000011318 | DYDC1   | intron     | -0.108 | rs799282 rs7895 | 2 |
| AAAAT.ATTTT | 14 | 89168391 | 89168406 | 3.2     | .                  | .       | intergenic | .      | rs792119254     | 2 |
| AAAC.GTTT   | 14 | 89182534 | 89182553 | 5       | .                  | .       | intergenic | .      | rs788637539     | 2 |
| ACT.AGT     | 14 | 89649831 | 89649857 | 9       | .                  | .       | intergenic | .      | rs790419937     | 2 |
| AG.CT       | 14 | 89659847 | 89659859 | 6.5     | .                  | .       | intergenic | 0.067  | rs789435181     | 4 |
| AT.AT       | 14 | 89889153 | 89889165 | 6.5     | .                  | .       | intergenic | 0.201  | rs789609006     | 2 |
| AAAT.ATTT   | 14 | 89936186 | 89936204 | 4.75    | .                  | .       | intergenic | .      | rs791701347     | 2 |
| AC.GT       | 14 | 90150739 | 90150751 | 6.5     | .                  | .       | intergenic | -0.092 | rs579665 rs7904 | 2 |
| AAC.GTT     | 14 | 90207129 | 90207143 | 5       | .                  | .       | intergenic | 0.363  | rs790494052     | 3 |
| AC.GT       | 14 | 90291486 | 90291502 | 8.5     | .                  | .       | intergenic | 0.1    | rs790682706     | 2 |
| AC.GT       | 14 | 90352338 | 90352349 | 6       | .                  | .       | intergenic | .      | rs781416 rs7002 | 4 |
| AT.AT       | 14 | 90399958 | 90399977 | 10      | .                  | .       | intergenic | -0.109 | rs787400110     | 2 |
| AAAAC.GTTTT | 14 | 90410196 | 90410217 | 4.4     | .                  | .       | intergenic | 0.652  | .               | 2 |
| AAGG.CCTT   | 14 | 90497879 | 90497890 | 3       | .                  | .       | intergenic | -0.098 | .               | 2 |
| AC.GT       | 14 | 90508999 | 90509013 | 7.5     | .                  | .       | intergenic | -0.131 | rs788573072     | 2 |
| AAC.GTT     | 14 | 90516633 | 90516651 | 6.33333 | .                  | .       | intergenic | -0.156 | rs786842063     | 2 |
| AC.GT       | 14 | 90807495 | 90807507 | 6.5     | .                  | .       | intergenic | 0.013  | rs790141700     | 2 |
| ACAG.CTGT   | 14 | 90834316 | 90834334 | 4.75    | .                  | .       | intergenic | .      | rs787856072     | 2 |
| AC.GT       | 14 | 90936658 | 90936672 | 7.5     | .                  | .       | intergenic | 0.016  | .               | 4 |
| AAAC.GTTT   | 14 | 90995703 | 90995721 | 4.75    | .                  | .       | intergenic | 0.084  | rs790383143     | 2 |
| AAAC.GTTT   | 14 | 91315791 | 91315804 | 3.5     | .                  | .       | intergenic | 0.324  | rs790866372     | 2 |
| AC.GT       | 14 | 91354362 | 91354374 | 6.5     | .                  | .       | intergenic | -0.213 | .               | 4 |
| AAAC.GTTT   | 14 | 91462365 | 91462385 | 5.25    | .                  | .       | intergenic | -0.107 | rs575598 rs7868 | 2 |
| AAAT.ATTT   | 14 | 92048108 | 92048124 | 4.25    | .                  | .       | intergenic | .      | rs788991539     | 2 |
| AG.CT       | 14 | 92087386 | 92087401 | 8       | .                  | .       | intergenic | -0.135 | rs786212459     | 2 |
| AC.GT       | 14 | 92205970 | 92205979 | 5       | ENSSSCT00000011325 | GHITM   | 3'utr      | 0.022  | .               | 2 |
| AAAC.GTTT   | 14 | 92396054 | 92396074 | 5.25    | ENSSSCT00000031701 | CCSER2  | intron     | .      | rs786804769     | 2 |

|              |    |           |           |         |                    |        |            |        |                 |   |
|--------------|----|-----------|-----------|---------|--------------------|--------|------------|--------|-----------------|---|
| AAAC.GTTT    | 14 | 92396054  | 92396074  | 5.25    | ENSSSCT00000011332 | CCSER2 | intron     | .      | rs786804769     | 2 |
| AAAAC.GTTTT  | 14 | 92398141  | 92398165  | 5       | ENSSSCT00000031701 | CCSER2 | intron     | .      | rs788469148     | 2 |
| AAAAC.GTTTT  | 14 | 92398141  | 92398165  | 5       | ENSSSCT00000011332 | CCSER2 | intron     | .      | rs788469148     | 2 |
| AAAAC.GTTTT  | 14 | 92485911  | 92485926  | 3.2     | ENSSSCT00000031701 | CCSER2 | intron     | 0.462  | rs787290101     | 2 |
| AAAAC.GTTTT  | 14 | 92485911  | 92485926  | 3.2     | ENSSSCT00000011332 | CCSER2 | intron     | 0.462  | rs787290101     | 2 |
| AT.AT        | 14 | 92643720  | 92643729  | 5       | .                  | .      | intergenic | 0.083  | .               | 3 |
| AC.GT        | 14 | 92719156  | 92719177  | 11      | .                  | .      | intergenic | -0.16  | rs786644501     | 2 |
| AC.GT        | 14 | 92829745  | 92829755  | 5.5     | .                  | .      | intergenic | 0.067  | .               | 6 |
| AT.AT        | 14 | 92953164  | 92953176  | 6.5     | .                  | .      | intergenic | -0.01  | rs792209537     | 2 |
| AT.AT        | 14 | 93325443  | 93325459  | 8.5     | .                  | .      | intergenic | .      | rs78644501      | 2 |
| AAAAC.GTTTT  | 14 | 93483178  | 93483202  | 5       | ENSSSCT00000011333 | .      | intron     | -0.057 | rs702369505     | 2 |
| AC.GT        | 14 | 93795645  | 93795674  | 15      | .                  | .      | intergenic | 0.049  | rs73179 rs7867  | 2 |
| AAAC.GTTT    | 14 | 93847917  | 93847931  | 3.75    | .                  | .      | intergenic | 0.123  | rs135552 rs7904 | 2 |
| AAAT.ATTT    | 14 | 93988794  | 93988808  | 3.75    | ENSSSCT00000022896 | .      | intron     | -0.249 | rs793086732     | 2 |
| AT.AT        | 14 | 95272150  | 95272161  | 6       | ENSSSCT00000011342 | BMPR1A | intron     | -0.146 | rs701455741     | 3 |
| AAAC.GTTT    | 14 | 95536449  | 95536473  | 6.25    | .                  | .      | intergenic | -1.228 | rs787861184     | 2 |
| AC.GT        | 14 | 95599054  | 95599068  | 7.5     | ENSSSCT00000022588 | FAM35A | promoter   | .      | rs791214122     | 4 |
| AAAG.CTTT    | 14 | 95647723  | 95647748  | 6.5     | .                  | .      | intergenic | .      | rs399004 rs7932 | 2 |
| CACAT.ATGTG  | 14 | 96308749  | 96308787  | 6.5     | .                  | .      | intergenic | .      | rs791343162     | 2 |
| AATG.CATT    | 14 | 96726165  | 96726192  | 7       | ENSSSCT00000011362 | MAPK8  | intron     | 0.328  | rs181931 rs7919 | 2 |
| AAAC.GTTT    | 14 | 96975533  | 96975547  | 3.75    | ENSSSCT00000011364 | .      | intron     | -0.166 | rs793612040     | 2 |
| AAG.CTT      | 14 | 97199323  | 97199336  | 4.66667 | ENSSSCT00000026607 | WDFY4  | intron     | -0.032 | rs792651729     | 2 |
| AAG.CTT      | 14 | 97199323  | 97199336  | 4.66667 | ENSSSCT00000011366 | WDFY4  | intron     | -0.032 | rs792651729     | 2 |
| AG.CT        | 14 | 97440054  | 97440065  | 6       | .                  | .      | intergenic | -0.317 | rs164255 rs7888 | 2 |
| AG.CT        | 14 | 97854520  | 97854531  | 6       | ENSSSCT00000011374 | DRGX   | intron     | .      | rs792323172     | 2 |
| AG.CT        | 14 | 98027435  | 98027445  | 5.5     | ENSSSCT00000011376 | CHAT   | intron     | 0.057  | rs791707032     | 2 |
| AAAC.GTTT    | 14 | 98044157  | 98044184  | 7       | ENSSSCT00000011376 | CHAT   | intron     | .      | rs786407113     | 2 |
| AAAC.GTTT    | 14 | 98111632  | 98111652  | 5.25    | .                  | .      | intergenic | 0.362  | rs316341 rs7921 | 2 |
| AC.GT        | 14 | 98521325  | 98521336  | 6       | ENSSSCT00000011380 | PARG   | intron     | -0.191 | rs324687 rs7896 | 2 |
| AC.GT        | 14 | 98521325  | 98521336  | 6       | ENSSSCT00000023429 | .      | promoter   | -0.191 | rs324687 rs7896 | 2 |
| AAAAC.GTTTT  | 14 | 98592958  | 98592983  | 5.2     | ENSSSCT00000033578 | MSMB   | intron     | .      | rs384817 rs7885 | 2 |
| AAT.ATT      | 14 | 98633025  | 98633041  | 5.66667 | ENSSSCT00000011385 | .      | intron     | .      | rs793283629     | 2 |
| AC.GT        | 14 | 98730443  | 98730453  | 5.5     | ENSSSCT00000011386 | ZFAND4 | intron     | 0.152  | rs793262236     | 2 |
| AAC.GTT      | 14 | 98868066  | 98868083  | 6       | ENSSSCT00000011387 | 8-Mar  | intron     | .      | rs399189 rs6907 | 2 |
| AAAG.CTTT    | 14 | 99670176  | 99670190  | 3.75    | .                  | .      | intergenic | 0.011  | rs786338411     | 2 |
| AAAC.GTTT    | 14 | 99857852  | 99857882  | 7.75    | .                  | .      | intergenic | 0.131  | rs791447062     | 2 |
| AT.AT        | 14 | 99861498  | 99861527  | 15      | .                  | .      | intergenic | .      | rs133677 rs7873 | 3 |
| AT.AT        | 14 | 99864545  | 99864556  | 6       | .                  | .      | intergenic | 0.158  | rs787349911     | 2 |
| AT.AT        | 14 | 99956006  | 99956016  | 5.5     | .                  | .      | intergenic | -0.083 | rs384933 rs7879 | 4 |
| AG.CT        | 14 | 100022843 | 100022869 | 13.5    | .                  | .      | intergenic | .      | rs793354657     | 2 |
| AC.GT        | 14 | 100067471 | 100067485 | 7.5     | .                  | .      | intergenic | -0.477 | .               | 2 |
| AAG.CTT      | 14 | 100282168 | 100282179 | 4       | .                  | .      | intergenic | -0.001 | .               | 2 |
| AG.CT        | 14 | 100529761 | 100529777 | 8.5     | .                  | .      | intergenic | .      | rs789087903     | 2 |
| AAC.GTT      | 14 | 100667740 | 100667753 | 4.66667 | .                  | .      | intergenic | .      | rs300333 rs7919 | 2 |
| AAAC.GTTT    | 14 | 100701532 | 100701559 | 7       | .                  | .      | intergenic | .      | rs789375958     | 2 |
| AATG.CATT    | 14 | 100894636 | 100894651 | 4       | .                  | .      | intergenic | 0.079  | rs789490802     | 2 |
| AC.GT        | 14 | 101162196 | 101162228 | 16.5    | .                  | .      | intergenic | 0.017  | rs787691380     | 3 |
| ACC.GGT      | 14 | 101496084 | 101496098 | 5       | .                  | .      | intergenic | .      | rs280305 rs7923 | 2 |
| AAC.GTT      | 14 | 101551959 | 101551971 | 4.33333 | .                  | .      | intergenic | 0.325  | rs792074434     | 3 |
| AAAT.ATTT    | 14 | 101581886 | 101581903 | 4.5     | .                  | .      | intergenic | 0.042  | rs788126197     | 2 |
| AAAC.GTTT    | 14 | 101664934 | 101664949 | 4       | .                  | .      | intergenic | .      | rs788074911     | 2 |
| AC.GT        | 14 | 101691517 | 101691534 | 9       | .                  | .      | intergenic | .      | rs793882437     | 2 |
| AT.AT        | 14 | 101742021 | 101742032 | 6       | .                  | .      | intergenic | .      | rs215311 rs7909 | 2 |
| AAAC.GTTT    | 14 | 101792034 | 101792054 | 5.25    | .                  | .      | intergenic | .      | rs788728116     | 3 |
| AT.AT        | 14 | 101895978 | 101895988 | 5.5     | .                  | .      | intergenic | -0.104 | rs697260293     | 2 |
| AT.AT        | 14 | 102542728 | 102542741 | 7       | .                  | .      | intergenic | 0.11   | rs118918 rs7878 | 2 |
| AAAC.GTTT    | 14 | 102551989 | 102552017 | 7.25    | .                  | .      | intergenic | 0.176  | .               | 2 |
| AG.CT        | 14 | 102649493 | 102649516 | 12      | .                  | .      | intergenic | .      | rs789833803     | 2 |
| AGAT.ATCT    | 14 | 102733821 | 102733842 | 5.5     | .                  | .      | intergenic | 0.052  | rs792076121     | 2 |
| AT.AT        | 14 | 102852359 | 102852369 | 5.5     | .                  | .      | intergenic | .      | rs792431709     | 2 |
| AAAC.GTTT    | 14 | 102982258 | 102982285 | 7       | .                  | .      | intergenic | .      | rs792482719     | 3 |
| AAAC.GTTT    | 14 | 103021225 | 103021248 | 6       | .                  | .      | intergenic | -0.089 | rs789970035     | 2 |
| AAC.GTT      | 14 | 103213483 | 103213499 | 5.66667 | .                  | .      | intergenic | .      | rs698917760     | 3 |
| AAAT.ATTT    | 14 | 103362014 | 103362035 | 5.5     | .                  | .      | intergenic | .      | .               | 2 |
| AAAC.GTTT    | 14 | 103540965 | 103540986 | 5.5     | .                  | .      | intergenic | .      | rs388414 rs7916 | 2 |
| AT.AT        | 14 | 103677008 | 103677024 | 8.5     | .                  | .      | intergenic | -0.128 | .               | 2 |
| AG.CT        | 14 | 103981747 | 103981759 | 6.5     | .                  | .      | intergenic | -0.236 | .               | 3 |
| AAG.CTT      | 14 | 104036803 | 104036821 | 6.33333 | .                  | .      | intergenic | -0.068 | rs792131669     | 2 |
| AC.GT        | 14 | 104194502 | 104194513 | 6       | .                  | .      | intergenic | .      | rs791946096     | 2 |
| AAAAAT.ATTTT | 14 | 104246333 | 104246353 | 3.5     | .                  | .      | intergenic | .      | rs343644 rs7865 | 2 |
| AAAAC.GTTTT  | 14 | 104295986 | 104296000 | 3       | .                  | .      | intergenic | .      | rs145957 rs7890 | 2 |
| AAAT.ATTT    | 14 | 104347013 | 104347031 | 4.75    | .                  | .      | intergenic | .      | rs787512565     | 2 |
| AG.CT        | 14 | 104544963 | 104544972 | 5       | ENSSSCT00000011410 | PCDH15 | intron     | 0.035  | .               | 3 |
| AAAAG.CTTTT  | 14 | 104605831 | 104605853 | 3.83333 | ENSSSCT00000011410 | PCDH15 | intron     | -0.163 | rs790506981     | 2 |
| AAAC.GTTT    | 14 | 104958024 | 104958038 | 3.75    | .                  | .      | intergenic | 0.016  | rs789198168     | 2 |
| AC.GT        | 14 | 105019560 | 105019572 | 6.5     | .                  | .      | intergenic | .      | rs788378544     | 2 |
| AC.GT        | 14 | 105037794 | 105037810 | 8.5     | .                  | .      | intergenic | 0.185  | .               | 2 |
| AT.AT        | 14 | 105063799 | 105063819 | 10.5    | .                  | .      | intergenic | 0.189  | rs791979319     | 2 |
| AT.AT        | 14 | 105069922 | 105069931 | 5       | .                  | .      | intergenic | 0.56   | .               | 2 |
| AAAT.ATTT    | 14 | 105145571 | 105145585 | 3.75    | .                  | .      | intergenic | 0.161  | rs791063792     | 2 |
| AC.GT        | 14 | 105235331 | 105235343 | 6.5     | .                  | .      | intergenic | .      | rs791178100     | 3 |
| AAAAT.ATTTT  | 14 | 105346500 | 105346523 | 4.8     | .                  | .      | intergenic | .      | rs789046372     | 2 |
| AT.AT        | 14 | 105373119 | 105373128 | 5       | .                  | .      | intergenic | 0.196  | .               | 3 |
| AAAT.ATTT    | 14 | 105417987 | 105418005 | 4.75    | .                  | .      | intergenic | -0.195 | .               | 3 |

|              |    |           |           |         |                    |          |            |        |               |   |
|--------------|----|-----------|-----------|---------|--------------------|----------|------------|--------|---------------|---|
| AAAC.GTTT    | 14 | 105423019 | 105423038 | 5       | .                  | .        | intergenic | -0.027 | rs789696022   | 3 |
| ACC.GGT      | 14 | 105441814 | 105441827 | 4.66667 | .                  | .        | intergenic | .      | .             | 2 |
| AC.GT        | 14 | 105938690 | 105938700 | 5.5     | .                  | .        | intergenic | -0.061 | 134951 rs7892 | 3 |
| AAAAT.ATTTT  | 14 | 105987158 | 105987172 | 3       | .                  | .        | intergenic | .      | .             | 2 |
| AG.CT        | 14 | 106069457 | 106069473 | 8.5     | .                  | .        | intergenic | 0.043  | .             | 4 |
| AAAT.ATTT    | 14 | 106290309 | 106290336 | 7       | ENSSSCT00000011414 | PRKG1    | intron     | -0.014 | 294540 rs7872 | 2 |
| AATG.CATT    | 14 | 106335018 | 106335045 | 7       | ENSSSCT00000011414 | PRKG1    | intron     | 0.03   | rs792930340   | 2 |
| \AAAAC.GTTTT | 14 | 106708929 | 106708951 | 3.83333 | ENSSSCT00000011414 | PRKG1    | promoter   | -0.05  | 396042 rs7864 | 2 |
| AAAC.GTTT    | 14 | 106794351 | 106794378 | 7       | .                  | .        | intergenic | 0.179  | rs692239853   | 2 |
| AC.GT        | 14 | 106803249 | 106803259 | 5.5     | .                  | .        | intergenic | -0.153 | rs791772307   | 2 |
| AACC.GGTT    | 14 | 106821751 | 106821773 | 5.75    | .                  | .        | intergenic | 0.044  | rs793585100   | 2 |
| AAAAC.GTTTT  | 14 | 106865044 | 106865071 | 5.6     | .                  | .        | intergenic | 0.255  | rs787784747   | 2 |
| AAAAC.GTTTT  | 14 | 106878055 | 106878078 | 4.8     | .                  | .        | intergenic | -0.097 | .             | 2 |
| AGC.GCT      | 14 | 107457176 | 107457192 | 5.66667 | .                  | .        | intergenic | 0.11   | 331774 rs7896 | 2 |
| AAAT.ATTT    | 14 | 107491601 | 107491623 | 5.75    | .                  | .        | intergenic | 0.185  | rs786423762   | 2 |
| AT.AT        | 14 | 107552754 | 107552767 | 7       | ENSSSCT00000027836 | .        | intron     | -0.022 | rs787378793   | 3 |
| AC.GT        | 14 | 107581331 | 107581352 | 11      | ENSSSCT00000027836 | .        | intron     | 1.253  | rs788578249   | 2 |
| AC.GT        | 14 | 107590297 | 107590308 | 6       | ENSSSCT00000027836 | .        | intron     | .      | .             | 2 |
| AG.CT        | 14 | 107593842 | 107593851 | 5       | ENSSSCT00000027836 | .        | intron     | 0.176  | 726989 rs7927 | 2 |
| AAAC.GTTT    | 14 | 107608459 | 107608477 | 4.75    | ENSSSCT00000027836 | .        | intron     | -0.19  | rs788935657   | 2 |
| AATG.CATT    | 14 | 107612750 | 107612772 | 5.75    | ENSSSCT00000027836 | .        | intron     | -0.042 | rs786829744   | 2 |
| AT.AT        | 14 | 107650813 | 107650823 | 5.5     | ENSSSCT00000027836 | .        | intron     | 0.123  | .             | 4 |
| AC.GT        | 14 | 107728077 | 107728087 | 5.5     | .                  | .        | intergenic | -0.046 | rs789279910   | 2 |
| AC.GT        | 14 | 107770901 | 107770917 | 8.5     | .                  | .        | intergenic | -0.056 | 346345 rs7931 | 2 |
| AC.GT        | 14 | 107903001 | 107903014 | 7       | ENSSSCT00000011417 | .        | intron     | 0.437  | rs792039466   | 5 |
| AT.AT        | 14 | 108063640 | 108063649 | 5       | ENSSSCT00000011418 | SGMS1    | intron     | 0.021  | rs793620830   | 4 |
| AAAAG.CTTTT  | 14 | 108176575 | 108176596 | 4.4     | .                  | .        | intergenic | -0.095 | 206631 rs7876 | 2 |
| AC.GT        | 14 | 108308328 | 108308340 | 6.5     | .                  | .        | intergenic | 0.369  | rs787840612   | 2 |
| AAAT.ATTT    | 14 | 108323243 | 108323269 | 6.75    | .                  | .        | intergenic | -0.168 | 393240 rs7901 | 2 |
| AC.GT        | 14 | 108381254 | 108381273 | 10      | .                  | .        | intergenic | -0.045 | 386799 rs7884 | 2 |
| \AAAAG.CTTTT | 14 | 108408625 | 108408648 | 4       | .                  | .        | intergenic | 0.174  | rs792145478   | 2 |
| AC.GT        | 14 | 109378760 | 109378778 | 9.5     | .                  | .        | intergenic | 0.049  | .             | 2 |
| ACAT.ATGT    | 14 | 109378828 | 109378841 | 3.5     | .                  | .        | intergenic | 0.032  | 387274 rs7902 | 2 |
| AAT.ATT      | 14 | 109569967 | 109569981 | 5       | .                  | .        | intergenic | 0.085  | rs788381207   | 2 |
| AT.AT        | 14 | 109707091 | 109707100 | 5       | .                  | .        | intergenic | -0.036 | rs787704779   | 2 |
| \AAAAC.GTTTT | 14 | 109979984 | 109980006 | 3.83333 | .                  | .        | intergenic | .      | .             | 2 |
| AAC.GTT      | 14 | 110000453 | 110000475 | 7.66667 | .                  | .        | intergenic | 0      | rs789148338   | 2 |
| ACC.GGT      | 14 | 110024315 | 110024332 | 6       | .                  | .        | intergenic | -0.114 | rs698361527   | 2 |
| AG.CT        | 14 | 110030526 | 110030538 | 6.5     | .                  | .        | intergenic | -0.031 | rs789092955   | 2 |
| AAAC.GTTT    | 14 | 110079098 | 110079124 | 6.75    | .                  | .        | intergenic | -0.036 | 300779 rs7881 | 2 |
| AC.GT        | 14 | 110297591 | 110297619 | 14.5    | .                  | .        | intergenic | 0.308  | rs793751433   | 2 |
| AAAAC.GTTTT  | 14 | 110700418 | 110700441 | 4.8     | .                  | .        | intergenic | 0.154  | rs700669677   | 2 |
| AAG.CTT      | 14 | 110927387 | 110927402 | 5.33333 | .                  | .        | intergenic | .      | rs706636575   | 2 |
| AAAC.GTTT    | 14 | 111250580 | 111250596 | 4.25    | .                  | .        | intergenic | .      | rs787674820   | 2 |
| AGAT.ATCT    | 14 | 111655911 | 111655929 | 4.75    | ENSSSCT00000011445 | HTR7     | intron     | .      | rs787651446   | 2 |
| AAAAC.GTTTT  | 14 | 111775923 | 111775941 | 3.8     | .                  | .        | intergenic | .      | rs789568607   | 2 |
| AAAG.CTTT    | 14 | 111782852 | 111782870 | 4.75    | .                  | .        | intergenic | -0.11  | rs789250806   | 3 |
| AT.AT        | 14 | 111949889 | 111949913 | 12.5    | .                  | .        | intergenic | 0.098  | rs787986359   | 2 |
| AGG.CCT      | 14 | 111987791 | 111987804 | 4.66667 | .                  | .        | intergenic | -0.009 | rs792142342   | 2 |
| \AAAAC.GTTTT | 14 | 112573831 | 112573851 | 3.5     | .                  | .        | intergenic | .      | rs793203088   | 2 |
| AAAC.GTTT    | 14 | 113079098 | 113079112 | 3.75    | ENSSSCT00000011455 | .        | intron     | .      | rs790417532   | 2 |
| AAAT.ATTT    | 14 | 113095299 | 113095315 | 4.25    | ENSSSCT00000011455 | .        | intron     | 0.266  | rs705196049   | 2 |
| AAGC.GCTT    | 14 | 113391327 | 113391349 | 5.75    | .                  | .        | intergenic | 0.057  | 340556 rs7908 | 2 |
| \AAAAC.GTTTT | 14 | 113857294 | 113857322 | 4.83333 | .                  | .        | intergenic | 0.124  | 153678 rs7877 | 2 |
| AAC.GTT      | 14 | 113885223 | 113885235 | 4.33333 | .                  | .        | intergenic | .      | rs792646611   | 3 |
| \AAAAC.GTTTT | 14 | 114093895 | 114093921 | 4.5     | ENSSSCT00000011461 | .        | intron     | .      | 745228 rs7938 | 2 |
| AT.AT        | 14 | 114505493 | 114505503 | 5.5     | ENSSSCT00000011464 | .        | intron     | 1.093  | rs791845277   | 2 |
| AAC.GTT      | 14 | 114557261 | 114557277 | 5.66667 | ENSSSCT00000011464 | .        | intron     | 0.241  | 341506 rs7884 | 3 |
| AGG.CCT      | 14 | 114574592 | 114574606 | 5       | ENSSSCT00000011464 | .        | intron     | 0.026  | rs791316818   | 2 |
| AAC.GTT      | 14 | 114594570 | 114594583 | 4.66667 | ENSSSCT00000011464 | .        | intron     | 0.003  | 729927 rs7901 | 2 |
| AAAC.GTTT    | 14 | 114819757 | 114819774 | 4.5     | ENSSSCT00000011468 | PDE6C    | intron     | .      | rs792741937   | 2 |
| AT.AT        | 14 | 114887484 | 114887502 | 9.5     | ENSSSCT00000031763 | FRA10AC1 | intron     | .      | rs793724923   | 3 |
| AAAC.GTTT    | 14 | 114939005 | 114939019 | 3.75    | .                  | .        | intergenic | 0.072  | 510025 rs7903 | 2 |
| AT.AT        | 14 | 115004717 | 115004726 | 5       | .                  | .        | intergenic | .      | 266687 rs7897 | 2 |
| AC.GT        | 14 | 115491792 | 115491821 | 15      | ENSSSCT00000011471 | PLCE1    | intron     | 0.165  | 334012 rs7871 | 4 |
| AC.GT        | 14 | 115556913 | 115556934 | 11      | ENSSSCT00000011471 | PLCE1    | intron     | 0.042  | rs712757476   | 4 |
| AT.AT        | 14 | 115633931 | 115633944 | 7       | ENSSSCT00000032028 | NOC3L    | intron     | .      | rs790359886   | 2 |
| AT.AT        | 14 | 115633931 | 115633944 | 7       | ENSSSCT00000011472 | NOC3L    | intron     | .      | rs790359886   | 2 |
| AT.AT        | 14 | 115853912 | 115853925 | 7       | .                  | .        | intergenic | .      | rs793798219   | 2 |
| AC.GT        | 14 | 116524317 | 116524329 | 6.5     | .                  | .        | intergenic | -0.212 | 308071 rs7938 | 3 |
| ACC.GGT      | 14 | 116687490 | 116687507 | 6       | .                  | .        | intergenic | 0.246  | 368440 rs7895 | 2 |
| ACAT.ATGT    | 14 | 117030103 | 117030114 | 3       | .                  | .        | intergenic | 0.164  | .             | 2 |
| AT.AT        | 14 | 117269925 | 117269935 | 5.5     | ENSSSCT00000011493 | BLNK     | intron     | .      | rs788791413   | 2 |
| AAAAC.GTTTT  | 14 | 117303371 | 117303397 | 5.4     | ENSSSCT00000011493 | BLNK     | intron     | 0.795  | 172958 rs7898 | 2 |
| AAACC.GGTTT  | 14 | 117522398 | 117522416 | 3.8     | .                  | .        | intergenic | 1.065  | rs793393327   | 2 |
| ACT.AGT      | 14 | 117649306 | 117649317 | 4       | ENSSSCT00000011498 | TM9SF3   | intron     | 0.158  | .             | 2 |
| ACC.GGT      | 14 | 118061840 | 118061855 | 5.33333 | .                  | .        | intergenic | 0.495  | rs791251930   | 2 |
| AATG.CATT    | 14 | 118260488 | 118260505 | 4.5     | ENSSSCT00000011504 | RRP12    | intron     | 1.016  | rs786905432   | 3 |
| AT.AT        | 14 | 118282574 | 118282587 | 7       | .                  | .        | intergenic | 0.358  | rs792330472   | 3 |
| AAAC.GTTT    | 14 | 118408972 | 118408990 | 4.75    | ENSSSCT00000027226 | UBTD1    | intron     | -0.011 | rs793471726   | 2 |
| AAAC.GTTT    | 14 | 118408972 | 118408990 | 4.75    | ENSSSCT00000011511 | UBTD1    | intron     | -0.011 | rs793471726   | 2 |
| AAGG.CCTT    | 14 | 118462387 | 118462404 | 4.5     | ENSSSCT00000011513 | HOGA1    | promoter   | -0.092 | rs788623068   | 2 |
| AAC.GTT      | 14 | 118649493 | 118649508 | 5.33333 | .                  | .        | intergenic | -0.121 | .             | 2 |
| AT.AT        | 14 | 118898565 | 118898575 | 5.5     | ENSSSCT00000011521 | R3HCC1L  | intron     | 0.315  | rs789009323   | 2 |



|               |    |           |           |         |                    |          |            |        |               |   |
|---------------|----|-----------|-----------|---------|--------------------|----------|------------|--------|---------------|---|
| AC.GT         | 14 | 118901816 | 118901830 | 7.5     | ENSSSCT00000011521 | R3HCC1L  | intron     | 0.199  | rs789484336   | 3 |
| AAG.CTT       | 14 | 119014723 | 119014737 | 5       | .                  | .        | intergenic | 0.081  | 342991 rs7866 | 2 |
| AAAC.GTTT     | 14 | 119067026 | 119067044 | 4.75    | .                  | .        | intergenic | -0.257 | 140451 rs7864 | 2 |
| AAAC.GTTT     | 14 | 119239711 | 119239725 | 3.75    | .                  | .        | intergenic | 0.118  | rs791835811   | 2 |
| AAAC.GTTT     | 14 | 119322182 | 119322202 | 5.25    | ENSSSCT00000011525 | HPSE2    | intron     | 0.079  | 185816 rs7935 | 3 |
| AG.CT         | 14 | 119365646 | 119365657 | 6       | ENSSSCT00000011525 | HPSE2    | intron     | .      | rs790040572   | 4 |
| AAC.GTT       | 14 | 119430253 | 119430277 | 8.33333 | .                  | .        | intergenic | 0.234  | rs792849015   | 2 |
| AT.AT         | 14 | 119481458 | 119481467 | 5       | .                  | .        | intergenic | .      | rs788706902   | 2 |
| AC.GT         | 14 | 119624100 | 119624112 | 6.5     | .                  | .        | intergenic | .      | .             | 2 |
| AG.CT         | 14 | 119916725 | 119916737 | 6.5     | .                  | .        | intergenic | 0.513  | .             | 3 |
| AAAT.ATTT     | 14 | 120071347 | 120071366 | 5       | ENSSSCT00000011527 | GOT1     | intron     | 0.182  | rs792271819   | 2 |
| AAAC.GTTT     | 14 | 120189675 | 120189695 | 5.25    | .                  | .        | intergenic | 0.093  | rs791547111   | 2 |
| AATG.CATT     | 14 | 120240636 | 120240654 | 4.75    | .                  | .        | intergenic | -0.167 | rs789116003   | 2 |
| AAAC.GTTT     | 14 | 120367606 | 120367624 | 4.75    | .                  | .        | intergenic | 0.224  | 252025 rs7862 | 2 |
| AAAC.GTTT     | 14 | 120393238 | 120393264 | 6.75    | .                  | .        | intergenic | .      | rs789117889   | 2 |
| AATG.CATT     | 14 | 120450868 | 120450888 | 5.25    | ENSSSCT00000011534 | ABCC2    | intron     | .      | rs786642206   | 2 |
| AAAAAC.GTTTTT | 14 | 120466290 | 120466310 | 3.5     | ENSSSCT00000011534 | ABCC2    | intron     | 0.558  | 180495 rs7866 | 2 |
| AAC.GTT       | 14 | 120498474 | 120498492 | 6.33333 | ENSSSCT00000011535 | DNMBP    | intron     | -0.058 | rs787518318   | 2 |
| AG.CT         | 14 | 120543982 | 120543995 | 7       | ENSSSCT00000011535 | DNMBP    | intron     | 0.404  | rs788707019   | 2 |
| AG.CT         | 14 | 120859741 | 120859751 | 5.5     | ENSSSCT00000011542 | CWF19L1  | intron     | 0.178  | .             | 3 |
| AAT.ATT       | 14 | 120891363 | 120891388 | 8.66667 | ENSSSCT00000011542 | CWF19L1  | promoter   | 0.302  | rs787918365   | 2 |
| AAAC.GTTT     | 14 | 121302844 | 121302864 | 5.25    | ENSSSCT00000011547 | HIF1AN   | intron     | .      | rs786209295   | 2 |
| AC.GT         | 14 | 121404084 | 121404103 | 10      | .                  | .        | intergenic | -0.061 | rs790191413   | 2 |
| AAAC.GTTT     | 14 | 121445300 | 121445322 | 5.75    | .                  | .        | intergenic | 0.053  | rs793370237   | 2 |
| AAAAAC.GTTTTT | 14 | 121945031 | 121945059 | 4.83333 | .                  | .        | intergenic | -0.099 | rs788392920   | 2 |
| AAAAAC.GTTTTT | 14 | 122108588 | 122108603 | 3.2     | .                  | .        | intergenic | .      | .             | 2 |
| AAAC.GTTT     | 14 | 122159299 | 122159317 | 4.75    | ENSSSCT00000011555 | BTRC     | intron     | 0.297  | 340511 rs7866 | 2 |
| AT.AT         | 14 | 122190322 | 122190340 | 9.5     | ENSSSCT00000011555 | BTRC     | intron     | 0.375  | .             | 2 |
| AGGGG.CCCCT   | 14 | 122326979 | 122326998 | 4       | ENSSSCT00000011555 | BTRC     | 3'utr      | 1.844  | 353888 rs7933 | 2 |
| AAAT.ATTT     | 14 | 122405679 | 122405697 | 4.75    | ENSSSCT00000011558 | FBXW4    | intron     | .      | rs793299212   | 2 |
| AAAAAC.GTTTTT | 14 | 122406782 | 122406804 | 4.6     | ENSSSCT00000011558 | FBXW4    | intron     | .      | rs786408174   | 2 |
| AC.GT         | 14 | 122714560 | 122714569 | 5       | ENSSSCT00000011562 | KCNIP2   | intron     | 0.18   | .             | 2 |
| AT.AT         | 14 | 122833681 | 122833691 | 5.5     | ENSSSCT00000011564 | C10orf76 | intron     | 0.09   | .             | 3 |
| AG.CT         | 14 | 122835007 | 122835019 | 6.5     | ENSSSCT00000011564 | C10orf76 | intron     | 0.446  | rs791035938   | 2 |
| AAAAT.ATTTT   | 14 | 122906716 | 122906735 | 4       | ENSSSCT00000011564 | C10orf76 | intron     | .      | rs787621523   | 2 |
| AG.CT         | 14 | 123787273 | 123787282 | 5       | .                  | .        | intergenic | .      | .             | 3 |
| AAC.GTT       | 14 | 124554069 | 124554082 | 4.66667 | .                  | .        | intergenic | -0.064 | rs693209044   | 4 |
| AAAAAC.GTTTTT | 14 | 124576072 | 124576094 | 4.6     | .                  | .        | intergenic | .      | rs787698717   | 2 |
| AAAC.GTTT     | 14 | 124722826 | 124722844 | 4.75    | .                  | .        | intergenic | 0.063  | 156998 rs7915 | 2 |
| AAACC.GGTTT   | 14 | 124802367 | 124802391 | 5       | .                  | .        | intergenic | 0.123  | 310136 rs7932 | 2 |
| ATC.GAT       | 14 | 124803353 | 124803370 | 6       | .                  | .        | intergenic | .      | 381811 rs7924 | 3 |
| AACAT.ATGTT   | 14 | 124834121 | 124834136 | 3.2     | ENSSSCT00000011602 | SLK      | intron     | 0.263  | 158110 rs7905 | 2 |
| AAAG.CTTT     | 14 | 124870127 | 124870149 | 5.75    | ENSSSCT00000011602 | SLK      | 3'utr      | 0.87   | 337108 rs7874 | 2 |
| AAC.GTT       | 14 | 124953709 | 124953727 | 6.33333 | .                  | .        | intergenic | .      | rs793202717   | 2 |
| AAC.GTT       | 14 | 125196158 | 125196177 | 6.66667 | ENSSSCT00000011608 | .        | intron     | .      | rs787596396   | 4 |
| AAAC.GTTT     | 14 | 125252589 | 125252609 | 5.25    | .                  | .        | intergenic | 0.379  | rs793875581   | 2 |
| AC.GT         | 14 | 125278483 | 125278494 | 6       | ENSSSCT00000011610 | CCDC147  | intron     | -0.105 | rs786474874   | 2 |
| AG.CT         | 14 | 125584945 | 125584956 | 6       | .                  | .        | intergenic | -0.103 | rs792192136   | 2 |
| AGG.CCT       | 14 | 125812228 | 125812240 | 4.33333 | .                  | .        | intergenic | -0.059 | rs787423546   | 2 |
| AGC.GCT       | 14 | 126065383 | 126065399 | 5.66667 | ENSSSCT00000011613 | SORCS3   | intron     | 0.491  | .             | 2 |
| AAAAAC.GTTTTT | 14 | 126194364 | 126194378 | 3       | .                  | .        | intergenic | -0.277 | rs789628983   | 2 |
| AAT.ATT       | 14 | 126198191 | 126198206 | 5.33333 | .                  | .        | intergenic | 0.019  | 323765 rs7889 | 2 |
| AC.GT         | 14 | 126285097 | 126285107 | 5.5     | .                  | .        | intergenic | -0.064 | .             | 2 |
| AAGG.CCTT     | 14 | 126290094 | 126290114 | 5.25    | .                  | .        | intergenic | -0.143 | rs791080255   | 2 |
| AAAC.GTTT     | 14 | 126476072 | 126476094 | 5.75    | .                  | .        | intergenic | -0.035 | 227797 rs7926 | 2 |
| AC.GT         | 14 | 126480669 | 126480683 | 7.5     | .                  | .        | intergenic | -0.182 | 780758 rs7878 | 4 |
| AT.AT         | 14 | 127012927 | 127012937 | 5.5     | .                  | .        | intergenic | .      | rs790267295   | 3 |
| AAAAAC.GTTTTT | 14 | 127117986 | 127118002 | 3.4     | .                  | .        | intergenic | .      | rs788813745   | 2 |
| AAAAAC.GTTTTT | 14 | 127170584 | 127170610 | 5.4     | .                  | .        | intergenic | -0.007 | 718106 rs7871 | 2 |
| AC.GT         | 14 | 127177753 | 127177768 | 8       | .                  | .        | intergenic | -0.033 | rs786395924   | 2 |
| AT.AT         | 14 | 127199743 | 127199761 | 9.5     | .                  | .        | intergenic | -0.027 | rs791260306   | 3 |
| AC.GT         | 14 | 127211656 | 127211678 | 11.5    | .                  | .        | intergenic | .      | rs787195489   | 2 |
| AC.GT         | 14 | 127217902 | 127217920 | 9.5     | .                  | .        | intergenic | .      | .             | 2 |
| AC.GT         | 14 | 127282937 | 127282955 | 9.5     | .                  | .        | intergenic | -0.091 | rs789054436   | 2 |
| AAC.GTT       | 14 | 127283321 | 127283351 | 10.3333 | .                  | .        | intergenic | -0.33  | 379303 rs7929 | 2 |
| AC.GT         | 14 | 127370080 | 127370090 | 5.5     | .                  | .        | intergenic | -0.125 | rs701905227   | 2 |
| AAAG.CTTT     | 14 | 127546472 | 127546486 | 3.75    | .                  | .        | intergenic | .      | .             | 2 |
| AAT.ATT       | 14 | 127749028 | 127749053 | 8.66667 | .                  | .        | intergenic | 0.057  | 596249 rs7934 | 2 |
| AAAAAC.GTTTTT | 14 | 127985871 | 127985889 | 3.8     | ENSSSCT00000033867 | SORCS1   | intron     | -0.079 | rs793554040   | 2 |
| AAAAAC.GTTTTT | 14 | 127985871 | 127985889 | 3.8     | ENSSSCT00000034837 | SORCS1   | intron     | -0.079 | rs793554040   | 2 |
| AAAAAC.GTTTTT | 14 | 127985871 | 127985889 | 3.8     | ENSSSCT00000034800 | SORCS1   | intron     | -0.079 | rs793554040   | 2 |
| AAAAAC.GTTTTT | 14 | 127985871 | 127985889 | 3.8     | ENSSSCT00000032873 | SORCS1   | intron     | -0.079 | rs793554040   | 2 |
| AAAAAC.GTTTTT | 14 | 127985871 | 127985889 | 3.8     | ENSSSCT00000026529 | SORCS1   | intron     | -0.079 | rs793554040   | 2 |
| AAAAAC.GTTTTT | 14 | 127985871 | 127985889 | 3.8     | ENSSSCT00000034580 | SORCS1   | intron     | -0.079 | rs793554040   | 2 |
| AAAAAC.GTTTTT | 14 | 127985871 | 127985889 | 3.8     | ENSSSCT00000035864 | SORCS1   | intron     | -0.079 | rs793554040   | 2 |
| AC.GT         | 14 | 128142382 | 128142403 | 11      | ENSSSCT00000033867 | SORCS1   | intron     | 0.758  | rs792692119   | 2 |
| AC.GT         | 14 | 128142382 | 128142403 | 11      | ENSSSCT00000034837 | SORCS1   | intron     | 0.758  | rs792692119   | 2 |
| AC.GT         | 14 | 128142382 | 128142403 | 11      | ENSSSCT00000034800 | SORCS1   | intron     | 0.758  | rs792692119   | 2 |
| AC.GT         | 14 | 128142382 | 128142403 | 11      | ENSSSCT00000032873 | SORCS1   | intron     | 0.758  | rs792692119   | 2 |
| AC.GT         | 14 | 128142382 | 128142403 | 11      | ENSSSCT00000034580 | SORCS1   | intron     | 0.758  | rs792692119   | 2 |
| AC.GT         | 14 | 128142382 | 128142403 | 11      | ENSSSCT00000035864 | SORCS1   | intron     | 0.758  | rs792692119   | 2 |
| AGG.CCT       | 14 | 128173537 | 128173553 | 5.66667 | ENSSSCT00000033867 | SORCS1   | intron     | -0.11  | .             | 2 |
| AGG.CCT       | 14 | 128173537 | 128173553 | 5.66667 | ENSSSCT00000034837 | SORCS1   | intron     | -0.11  | .             | 2 |
| AGG.CCT       | 14 | 128173537 | 128173553 | 5.66667 | ENSSSCT00000034800 | SORCS1   | intron     | -0.11  | .             | 2 |

|               |    |           |           |         |                    |           |            |        |               |   |
|---------------|----|-----------|-----------|---------|--------------------|-----------|------------|--------|---------------|---|
| AGG.CCT       | 14 | 128173537 | 128173553 | 5.66667 | ENSSSCT00000032873 | SORCS1    | intron     | -0.11  | .             | 2 |
| AGG.CCT       | 14 | 128173537 | 128173553 | 5.66667 | ENSSSCT00000034580 | SORCS1    | intron     | -0.11  | .             | 2 |
| AGG.CCT       | 14 | 128173537 | 128173553 | 5.66667 | ENSSSCT00000035864 | SORCS1    | intron     | -0.11  | .             | 2 |
| AC.GT         | 14 | 128203044 | 128203058 | 7.5     | ENSSSCT00000033867 | SORCS1    | intron     | -0.32  | .             | 3 |
| AC.GT         | 14 | 128203044 | 128203058 | 7.5     | ENSSSCT00000034837 | SORCS1    | intron     | -0.32  | .             | 3 |
| AC.GT         | 14 | 128203044 | 128203058 | 7.5     | ENSSSCT00000034800 | SORCS1    | intron     | -0.32  | .             | 3 |
| AC.GT         | 14 | 128203044 | 128203058 | 7.5     | ENSSSCT00000032873 | SORCS1    | intron     | -0.32  | .             | 3 |
| AC.GT         | 14 | 128203044 | 128203058 | 7.5     | ENSSSCT00000034580 | SORCS1    | intron     | -0.32  | .             | 3 |
| AC.GT         | 14 | 128203044 | 128203058 | 7.5     | ENSSSCT00000035864 | SORCS1    | intron     | -0.32  | .             | 3 |
| AACC.GGTT     | 14 | 128398599 | 128398618 | 5       | .                  | .         | intergenic | 0.359  | 167089 rs7906 | 2 |
| AATT.AATT     | 14 | 128888242 | 128888268 | 6.75    | .                  | .         | intergenic | .      | rs790250139   | 2 |
| AG.CT         | 14 | 128909642 | 128909651 | 5       | .                  | .         | intergenic | -0.183 | 386356 rs7866 | 3 |
| AC.GT         | 14 | 129183649 | 129183680 | 16      | .                  | .         | intergenic | .      | rs694951115   | 4 |
| AC.GT         | 14 | 129427195 | 129427221 | 13.5    | .                  | .         | intergenic | -0.193 | .             | 4 |
| AC.GT         | 14 | 129439839 | 129439854 | 8       | .                  | .         | intergenic | .      | .             | 2 |
| AG.CT         | 14 | 129747941 | 129747955 | 7.5     | .                  | .         | intergenic | .      | rs788911720   | 2 |
| AAC.GTT       | 14 | 129751987 | 129752011 | 8.33333 | .                  | .         | intergenic | .      | 502965 rs7890 | 2 |
| AT.AT         | 14 | 129900364 | 129900374 | 5.5     | .                  | .         | intergenic | 0.148  | rs694790927   | 3 |
| AAAC.GTTT     | 14 | 129936756 | 129936771 | 4       | .                  | .         | intergenic | 0.223  | 341259 rs7902 | 2 |
| AC.GT         | 14 | 130089656 | 130089665 | 5       | .                  | .         | intergenic | .      | 301527 rs7929 | 2 |
| AAAT.ATTT     | 14 | 130205241 | 130205273 | 8.25    | .                  | .         | intergenic | .      | .             | 2 |
| AAAC.GTTT     | 14 | 130370709 | 130370727 | 4.75    | .                  | .         | intergenic | .      | .             | 2 |
| AAAC.GTTT     | 14 | 130420255 | 130420269 | 3.75    | .                  | .         | intergenic | .      | rs791334539   | 2 |
| AAAAC.GTTTT   | 14 | 130439463 | 130439480 | 3.6     | .                  | .         | intergenic | .      | 337042 rs7877 | 2 |
| AAAAAC.GTTTTT | 14 | 130513951 | 130513984 | 5.66667 | .                  | .         | intergenic | 0.033  | rs792459125   | 2 |
| AAAC.GTTT     | 14 | 130727746 | 130727758 | 3.25    | .                  | .         | intergenic | -0.134 | rs788417306   | 2 |
| AAAT.ATTT     | 14 | 130771078 | 130771093 | 4       | .                  | .         | intergenic | 0.076  | rs792037296   | 2 |
| AAAC.GTTT     | 14 | 130978847 | 130978866 | 5       | .                  | .         | intergenic | 0.021  | rs790638832   | 2 |
| AAT.ATT       | 14 | 131086391 | 131086425 | 11.6667 | .                  | .         | intergenic | 1.494  | rs786944832   | 2 |
| AC.GT         | 14 | 131101101 | 131101112 | 6       | .                  | .         | intergenic | 0.188  | .             | 2 |
| AG.CT         | 14 | 131123069 | 131123078 | 5       | ENSSSCT00000011616 | XPNPEP1   | intron     | -0.176 | .             | 2 |
| AAAC.GTTT     | 14 | 131300445 | 131300457 | 3.25    | ENSSSCT00000011617 | ADD3      | intron     | 0.447  | rs793717325   | 2 |
| AC.GT         | 14 | 131406600 | 131406617 | 9       | ENSSSCT00000011617 | ADD3      | intron     | 0.147  | rs788032262   | 4 |
| AAC.GTT       | 14 | 131437560 | 131437576 | 5.66667 | .                  | .         | intergenic | 0.051  | 155825 rs7882 | 4 |
| AC.GT         | 14 | 131681037 | 131681061 | 12.5    | .                  | .         | intergenic | -0.085 | rs790244257   | 2 |
| AAAC.GTTT     | 14 | 131731559 | 131731582 | 6       | .                  | .         | intergenic | -0.234 | rs793202512   | 2 |
| AC.GT         | 14 | 131911509 | 131911521 | 6.5     | .                  | .         | intergenic | 0.33   | rs792535956   | 2 |
| AAAT.ATTT     | 14 | 131917580 | 131917601 | 5.5     | .                  | .         | intergenic | .      | rs788096666   | 2 |
| AAAC.GTTT     | 14 | 131956028 | 131956046 | 4.75    | .                  | .         | intergenic | 0.007  | 355875 rs7892 | 2 |
| AAAAT.ATTTT   | 14 | 131994908 | 131994926 | 3.8     | .                  | .         | intergenic | -0.057 | rs787454130   | 4 |
| ACGC.GCGT     | 14 | 132043429 | 132043446 | 4.5     | .                  | .         | intergenic | 0.007  | 318249 rs7930 | 2 |
| AGG.CCT       | 14 | 132266364 | 132266379 | 5.33333 | ENSSSCT00000025919 | .         | intron     | 0.115  | 150061 rs7880 | 2 |
| AGAT.ATCT     | 14 | 132509450 | 132509469 | 5       | .                  | .         | intergenic | 0.079  | rs789317961   | 2 |
| AAAC.GTTT     | 14 | 132563949 | 132563963 | 3.75    | .                  | .         | intergenic | -0.334 | rs793544187   | 2 |
| AAAG.CTTT     | 14 | 132597529 | 132597542 | 3.5     | .                  | .         | intergenic | .      | rs788770045   | 2 |
| AAC.GTT       | 14 | 132754347 | 132754360 | 4.66667 | .                  | .         | intergenic | -0.137 | rs790406841   | 2 |
| AC.GT         | 14 | 132755146 | 132755159 | 7       | .                  | .         | intergenic | -0.028 | rs787670132   | 6 |
| AT.AT         | 14 | 132834708 | 132834728 | 10.5    | .                  | .         | intergenic | .      | rs792604405   | 2 |
| AATC.GATT     | 14 | 132918427 | 132918454 | 7       | .                  | .         | intergenic | 0.123  | 391143 rs7916 | 4 |
| AG.CT         | 14 | 133055554 | 133055564 | 5.5     | .                  | .         | intergenic | -0.117 | rs791101010   | 4 |
| AT.AT         | 14 | 133100105 | 133100114 | 5       | .                  | .         | intergenic | -0.558 | rs791229650   | 2 |
| AAAG.CTTT     | 14 | 133119554 | 133119567 | 3.5     | .                  | .         | intergenic | 0.004  | .             | 2 |
| AGGG.CCCT     | 14 | 133197342 | 133197359 | 4.5     | .                  | .         | intergenic | 0.093  | 328305 rs7896 | 2 |
| AAAAAG.CTTTTT | 14 | 133262039 | 133262065 | 4.5     | .                  | .         | intergenic | 0.102  | 319437 rs7039 | 2 |
| AC.GT         | 14 | 133534443 | 133534453 | 5.5     | .                  | .         | intergenic | .      | 376447 rs7923 | 2 |
| AAGAG.CTCTT   | 14 | 134243290 | 134243307 | 3.6     | .                  | .         | intergenic | .      | 714170 rs7876 | 2 |
| AC.GT         | 14 | 134719860 | 134719897 | 19      | ENSSSCT00000011635 | TCF7L2    | intron     | 0.67   | .             | 3 |
| AT.AT         | 14 | 134816149 | 134816162 | 7       | .                  | .         | intergenic | -0.007 | rs789638631   | 3 |
| AAAC.GTTT     | 14 | 134969851 | 134969865 | 3.75    | .                  | .         | intergenic | -0.143 | rs787674942   | 2 |
| AGC.GCT       | 14 | 135058500 | 135058514 | 5       | .                  | .         | intergenic | 0      | .             | 2 |
| AAAG.CTTT     | 14 | 135072952 | 135072977 | 6.5     | .                  | .         | intergenic | 0.083  | 302554 rs7922 | 2 |
| AAAAC.GTTTTT  | 14 | 135329922 | 135329952 | 6.2     | ENSSSCT00000011644 | .         | intron     | .      | 322100 rs7901 | 3 |
| ATC.GAT       | 14 | 135405515 | 135405528 | 4.66667 | .                  | .         | intergenic | 0.054  | rs790925042   | 2 |
| AG.CT         | 14 | 135452710 | 135452724 | 7.5     | .                  | .         | intergenic | -0.141 | .             | 2 |
| AT.AT         | 14 | 135519560 | 135519581 | 11      | ENSSSCT00000011646 | ADRB1     | promoter   | 0.298  | 321700 rs7878 | 3 |
| AAC.GTT       | 14 | 135558128 | 135558147 | 6.66667 | .                  | .         | intergenic | 0.253  | rs792603298   | 2 |
| AAC.GTT       | 14 | 135582756 | 135582771 | 5.33333 | .                  | .         | intergenic | .      | rs792346789   | 3 |
| AC.GT         | 14 | 135640640 | 135640651 | 6       | ENSSSCT00000011647 | C10orf118 | intron     | 0.08   | rs787720560   | 2 |
| AT.AT         | 14 | 135984017 | 135984028 | 6       | ENSSSCT00000011650 | ABLIM1    | intron     | -0.041 | rs789983681   | 2 |
| AT.AT         | 14 | 136086450 | 136086468 | 9.5     | ENSSSCT00000011650 | ABLIM1    | intron     | .      | rs788032883   | 2 |
| AAGG.CCTT     | 14 | 136157156 | 136157189 | 8.5     | .                  | .         | intergenic | 0.039  | rs788102461   | 4 |
| AT.AT         | 14 | 136585208 | 136585223 | 8       | ENSSSCT00000032203 | ATRNL1    | intron     | .      | 379722 rs7917 | 2 |
| AT.AT         | 14 | 136585208 | 136585223 | 8       | ENSSSCT00000011653 | ATRNL1    | intron     | .      | 379722 rs7917 | 2 |
| AAC.GTT       | 14 | 136586085 | 136586101 | 5.66667 | ENSSSCT00000032203 | ATRNL1    | intron     | .      | 201490 rs7917 | 2 |
| AAC.GTT       | 14 | 136586085 | 136586101 | 5.66667 | ENSSSCT00000011653 | ATRNL1    | intron     | .      | 201490 rs7917 | 2 |
| AAT.ATT       | 14 | 136669884 | 136669895 | 4       | ENSSSCT00000032203 | ATRNL1    | intron     | .      | rs793862343   | 3 |
| AAT.ATT       | 14 | 136669884 | 136669895 | 4       | ENSSSCT00000011653 | ATRNL1    | intron     | .      | rs793862343   | 3 |
| AAAG.CTTT     | 14 | 136709472 | 136709491 | 5       | ENSSSCT00000032203 | ATRNL1    | intron     | 0.374  | 717924 rs7925 | 2 |
| AAAG.CTTT     | 14 | 136709472 | 136709491 | 5       | ENSSSCT00000011653 | ATRNL1    | intron     | 0.374  | 717924 rs7925 | 2 |
| AAAAT.ATTTT   | 14 | 136846474 | 136846489 | 3.2     | ENSSSCT00000032203 | ATRNL1    | intron     | .      | rs790266147   | 2 |
| AG.CT         | 14 | 136968878 | 136968890 | 6.5     | .                  | .         | intergenic | .      | .             | 2 |
| AC.GT         | 14 | 137019383 | 137019394 | 6       | .                  | .         | intergenic | -0.048 | 370599 rs7873 | 2 |
| AAC.GTT       | 14 | 137089312 | 137089344 | 11      | .                  | .         | intergenic | .      | 286373 rs7927 | 2 |
| AT.AT         | 14 | 137131150 | 137131159 | 5       | .                  | .         | intergenic | 0.026  | rs790812728   | 2 |

|             |    |           |           |         |                    |           |            |        |                 |   |
|-------------|----|-----------|-----------|---------|--------------------|-----------|------------|--------|-----------------|---|
| AAAAC.GTTTT | 14 | 137200199 | 137200228 | 6       | .                  | .         | intergenic | 0.362  | rs695589149     | 2 |
| AC.GT       | 14 | 137214977 | 137214987 | 5.5     | .                  | .         | intergenic | -0.146 | rs789674459     | 2 |
| AC.GT       | 14 | 137248721 | 137248732 | 6       | .                  | .         | intergenic | -0.07  | rs702446103     | 3 |
| AACAC.GTGTT | 14 | 137502657 | 137502673 | 3.4     | .                  | .         | intergenic | .      | rs58225 rs7883  | 2 |
| AAT.ATT     | 14 | 137547162 | 137547180 | 6.33333 | ENSSSCT00000011654 | .         | intron     | 0.319  | rs792827803     | 2 |
| AAAT.ATTT   | 14 | 137585171 | 137585186 | 4       | ENSSSCT00000011654 | .         | intron     | .      | rs793605989     | 2 |
| AATG.CATT   | 14 | 137921886 | 137921918 | 8.25    | .                  | .         | intergenic | -0.296 | .               | 2 |
| AAC.GTT     | 14 | 137945226 | 137945239 | 4.66667 | .                  | .         | intergenic | 0.251  | rs791843766     | 3 |
| AAAT.ATTT   | 14 | 137976791 | 137976804 | 3.5     | .                  | .         | intergenic | 0.108  | rs790591097     | 2 |
| AAT.ATT     | 14 | 138164546 | 138164559 | 4.66667 | ENSSSCT00000011663 | .         | intron     | .      | rs787547669     | 2 |
| AAAC.GTTT   | 14 | 138412122 | 138412138 | 4.25    | ENSSSCT00000011666 | KIAA1598  | intron     | -0.125 | rs789179311     | 2 |
| AC.GT       | 14 | 138526992 | 138527009 | 9       | .                  | .         | intergenic | 0.645  | rs792459179     | 2 |
| AAAAC.GTTTT | 14 | 138912961 | 138912979 | 3.8     | .                  | .         | intergenic | 0.05   | rs789598444     | 2 |
| AG.CT       | 14 | 138921640 | 138921650 | 5.5     | .                  | .         | intergenic | .      | rs789440631     | 2 |
| AAAT.ATTT   | 14 | 138971146 | 138971162 | 4.25    | .                  | .         | intergenic | 0.006  | rs791256751     | 2 |
| AT.AT       | 14 | 139085725 | 139085734 | 5       | .                  | .         | intergenic | 0.06   | rs195529 rs7879 | 3 |
| AAAC.GTTT   | 14 | 139095682 | 139095697 | 4       | .                  | .         | intergenic | -0.176 | rs792218735     | 2 |
| AC.GT       | 14 | 139330725 | 139330739 | 7.5     | .                  | .         | intergenic | 0.352  | rs787474716     | 2 |
| AC.GT       | 14 | 139590043 | 139590055 | 6.5     | ENSSSCT00000011673 | RAB11FIP2 | intron     | 0.443  | rs703138 rs7877 | 2 |
| AT.AT       | 14 | 139677316 | 139677332 | 8.5     | .                  | .         | intergenic | 0.162  | rs793283664     | 3 |
| AAG.CTT     | 14 | 139682159 | 139682176 | 6       | .                  | .         | intergenic | 1.94   | rs792531021     | 2 |
| AT.AT       | 14 | 139731415 | 139731428 | 7       | .                  | .         | intergenic | 0.035  | .               | 2 |
| AC.GT       | 14 | 139744331 | 139744342 | 6       | .                  | .         | intergenic | 0.11   | rs788409927     | 2 |
| AT.AT       | 14 | 139784283 | 139784298 | 8       | .                  | .         | intergenic | 1.294  | rs313304 rs7904 | 3 |
| ATCC.GGAT   | 14 | 139837932 | 139837949 | 4.5     | .                  | .         | intergenic | 0.004  | rs790258959     | 2 |
| ATCC.GGAT   | 14 | 139981861 | 139981880 | 5       | .                  | .         | intergenic | 0.139  | rs789215315     | 2 |
| AC.GT       | 14 | 140205779 | 140205803 | 12.5    | ENSSSCT00000023068 | .         | intron     | .      | rs341455 rs7919 | 2 |
| AG.CT       | 14 | 140208359 | 140208368 | 5       | ENSSSCT00000023068 | .         | intron     | 0.053  | .               | 4 |
| AT.AT       | 14 | 140217676 | 140217686 | 5.5     | ENSSSCT00000023068 | .         | intron     | 0.103  | rs793783198     | 4 |
| AAGC.GCTT   | 14 | 140284624 | 140284640 | 4.25    | .                  | .         | intergenic | -0.166 | rs385545 rs7924 | 2 |
| AC.GT       | 14 | 140444876 | 140444885 | 5       | .                  | .         | intergenic | .      | rs788377222     | 2 |
| AAAC.GTTT   | 14 | 140670705 | 140670736 | 8       | ENSSSCT00000011684 | GRK5      | intron     | -0.148 | rs778424 rs7923 | 2 |
| AAAG.CTTT   | 14 | 140701901 | 140701927 | 6.75    | ENSSSCT00000011684 | GRK5      | intron     | .      | rs394811 rs7924 | 3 |
| AAAAC.GTTTT | 14 | 140703401 | 140703424 | 4       | ENSSSCT00000011684 | GRK5      | intron     | 0.071  | rs234869 rs7902 | 2 |
| AAAAT.ATTTT | 14 | 140819316 | 140819341 | 5.2     | ENSSSCT00000011684 | GRK5      | intron     | -0.34  | .               | 2 |
| AAG.CTT     | 14 | 140982667 | 140982681 | 5       | ENSSSCT00000011686 | .         | intron     | 0.041  | .               | 3 |
| AAAC.GTTT   | 14 | 141055944 | 141055970 | 6.75    | ENSSSCT00000011687 | BAG3      | intron     | 0.154  | rs786437605     | 3 |
| AAAC.GTTT   | 14 | 141132515 | 141132533 | 4.75    | ENSSSCT00000011688 | INPP5F    | intron     | 0.305  | rs792154506     | 2 |
| AAAT.ATTT   | 14 | 141299420 | 141299452 | 8.25    | ENSSSCT00000011691 | .         | intron     | .      | rs779960 rs7862 | 2 |
| AC.GT       | 14 | 141535497 | 141535512 | 8       | .                  | .         | intergenic | .      | rs791627779     | 2 |
| AC.GT       | 14 | 141644981 | 141644997 | 8.5     | .                  | .         | intergenic | -0.165 | rs792170167     | 3 |
| AC.GT       | 14 | 141674001 | 141674013 | 6.5     | .                  | .         | intergenic | -0.003 | rs786635185     | 5 |
| AAAC.GTTT   | 14 | 141862139 | 141862153 | 3.75    | ENSSSCT00000011692 | PPAPDC1A  | intron     | .      | rs136091 rs7923 | 2 |
| AC.GT       | 14 | 142000537 | 142000549 | 6.5     | .                  | .         | intergenic | -0.024 | rs144030 rs7865 | 2 |
| AAAC.GTTT   | 14 | 142097645 | 142097656 | 3       | .                  | .         | intergenic | .      | rs790643193     | 2 |
| AGG.CCT     | 14 | 142288992 | 142289007 | 5.33333 | ENSSSCT00000011693 | .         | intron     | -0.217 | .               | 2 |
| AG.CT       | 14 | 142376511 | 142376522 | 6       | .                  | .         | intergenic | 0.144  | rs787016329     | 2 |
| AG.CT       | 14 | 142424998 | 142425009 | 6       | .                  | .         | intergenic | -0.198 | .               | 3 |
| AGGG.CCCT   | 14 | 142503749 | 142503762 | 3.5     | ENSSSCT00000036109 | FGFR2     | intron     | -0.077 | rs786761694     | 2 |
| AGGG.CCCT   | 14 | 142503749 | 142503762 | 3.5     | ENSSSCT00000035425 | FGFR2     | intron     | -0.077 | rs786761694     | 2 |
| AGGG.CCCT   | 14 | 142503749 | 142503762 | 3.5     | ENSSSCT00000033576 | FGFR2     | intron     | -0.077 | rs786761694     | 2 |
| AGGG.CCCT   | 14 | 142503749 | 142503762 | 3.5     | ENSSSCT00000033651 | FGFR2     | intron     | -0.077 | rs786761694     | 2 |
| AGGG.CCCT   | 14 | 142503749 | 142503762 | 3.5     | ENSSSCT00000033270 | FGFR2     | intron     | -0.077 | rs786761694     | 2 |
| AGGG.CCCT   | 14 | 142503749 | 142503762 | 3.5     | ENSSSCT00000011702 | FGFR2     | intron     | -0.077 | rs786761694     | 2 |
| AGGG.CCCT   | 14 | 142503749 | 142503762 | 3.5     | ENSSSCT00000032653 | FGFR2     | intron     | -0.077 | rs786761694     | 2 |
| AGGG.CCCT   | 14 | 142503749 | 142503762 | 3.5     | ENSSSCT00000033856 | FGFR2     | intron     | -0.077 | rs786761694     | 2 |
| ATCC.GGAT   | 14 | 142535400 | 142535442 | 10.75   | ENSSSCT00000032653 | FGFR2     | intron     | -0.22  | rs322781 rs7926 | 2 |
| ATCC.GGAT   | 14 | 142535400 | 142535442 | 10.75   | ENSSSCT00000033856 | FGFR2     | intron     | -0.22  | rs322781 rs7926 | 2 |
| ATCC.GGAT   | 14 | 142535400 | 142535442 | 10.75   | ENSSSCT00000035980 | FGFR2     | intron     | -0.22  | rs322781 rs7926 | 2 |
| ATCC.GGAT   | 14 | 142535400 | 142535442 | 10.75   | ENSSSCT00000035159 | FGFR2     | intron     | -0.22  | rs322781 rs7926 | 2 |
| ATCC.GGAT   | 14 | 142535400 | 142535442 | 10.75   | ENSSSCT00000036109 | FGFR2     | intron     | -0.22  | rs322781 rs7926 | 2 |
| ATCC.GGAT   | 14 | 142535400 | 142535442 | 10.75   | ENSSSCT00000035425 | FGFR2     | intron     | -0.22  | rs322781 rs7926 | 2 |
| ATCC.GGAT   | 14 | 142535400 | 142535442 | 10.75   | ENSSSCT00000033270 | FGFR2     | intron     | -0.22  | rs322781 rs7926 | 2 |
| ATCC.GGAT   | 14 | 142535400 | 142535442 | 10.75   | ENSSSCT00000011702 | FGFR2     | intron     | -0.22  | rs322781 rs7926 | 2 |
| ATCC.GGAT   | 14 | 142535400 | 142535442 | 10.75   | ENSSSCT00000033576 | FGFR2     | intron     | -0.22  | rs322781 rs7926 | 2 |
| ATCC.GGAT   | 14 | 142535400 | 142535442 | 10.75   | ENSSSCT00000033651 | FGFR2     | intron     | -0.22  | rs322781 rs7926 | 2 |
| AAAAC.GTTTT | 14 | 142821353 | 142821373 | 4.2     | ENSSSCT00000011705 | ATE1      | intron     | 0.119  | rs786769470     | 2 |
| AC.GT       | 14 | 142835110 | 142835124 | 7.5     | ENSSSCT00000011705 | ATE1      | intron     | .      | rs370395 rs7899 | 3 |
| AAAAC.GTTTT | 14 | 142894050 | 142894073 | 4.8     | .                  | .         | intergenic | .      | rs790658812     | 2 |
| AAAAC.GTTTT | 14 | 143519950 | 143519974 | 4.16667 | ENSSSCT00000011709 | HTRA1     | intron     | -0.402 | rs791393909     | 2 |
| AC.GT       | 14 | 143526896 | 143526909 | 7       | ENSSSCT00000011709 | HTRA1     | intron     | -0.2   | rs707819821     | 2 |
| AAT.ATT     | 14 | 144252883 | 144252898 | 5.33333 | .                  | .         | intergenic | -0.068 | rs789390171     | 2 |
| AAAGC.GCTTT | 14 | 144318818 | 144318837 | 3.33333 | .                  | .         | intergenic | .      | rs787779039     | 3 |
| AT.AT       | 14 | 144401311 | 144401323 | 6.5     | .                  | .         | intergenic | -0.028 | .               | 3 |
| ATCC.GGAT   | 14 | 144409808 | 144409851 | 11      | .                  | .         | intergenic | -0.036 | rs791077414     | 2 |
| AT.AT       | 14 | 144702509 | 144702520 | 6       | .                  | .         | intergenic | .      | rs786688565     | 3 |
| AT.AT       | 14 | 144765075 | 144765085 | 5.5     | .                  | .         | intergenic | .      | rs787302541     | 2 |
| AC.GT       | 14 | 144988261 | 144988283 | 11.5    | ENSSSCT00000011739 | CPXM2     | intron     | 0.152  | rs793738220     | 2 |
| AC.GT       | 14 | 145784030 | 145784041 | 6       | .                  | .         | intergenic | 0.142  | rs791480491     | 2 |
| AG.CT       | 14 | 145789795 | 145789808 | 7       | .                  | .         | intergenic | -0.09  | rs787045842     | 2 |
| AC.GT       | 14 | 145800366 | 145800388 | 11.5    | .                  | .         | intergenic | -0.032 | .               | 3 |
| AAAT.ATTT   | 14 | 146398871 | 146398886 | 4       | .                  | .         | intergenic | -0.063 | .               | 2 |
| AAC.GTT     | 14 | 146492762 | 146492785 | 8       | .                  | .         | intergenic | 0.002  | .               | 4 |
| AC.GT       | 14 | 146847678 | 146847691 | 7       | ENSSSCT00000011757 | FANK1     | intron     | 0.159  | rs114173 rs7900 | 3 |

|              |    |           |           |         |                    |       |            |        |                 |   |
|--------------|----|-----------|-----------|---------|--------------------|-------|------------|--------|-----------------|---|
| AAAAT.ATTTT  | 14 | 147098871 | 147098895 | 5       | .                  | .     | intergenic | -0.041 | rs786262518     | 2 |
| AAAC.GTTT    | 14 | 147678990 | 147679008 | 4.75    | .                  | .     | intergenic | 0.517  | rs792973326     | 2 |
| AAC.GTT      | 14 | 147796675 | 147796693 | 6.33333 | .                  | .     | intergenic | 0.009  | rs787156282     | 2 |
| AAAC.GTTT    | 14 | 147901415 | 147901429 | 3.75    | .                  | .     | intergenic | 0.021  | rs791836864     | 2 |
| AG.CT        | 14 | 148006490 | 148006499 | 5       | .                  | .     | intergenic | -0.166 | rs792410233     | 2 |
| ACTC.GAGT    | 14 | 148316495 | 148316512 | 4.5     | .                  | .     | intergenic | -0.364 | rs788276817     | 2 |
| AAAC.GTTT    | 14 | 148360099 | 148360112 | 3.5     | .                  | .     | intergenic | -0.097 | rs13644 rs7882  | 2 |
| AAAC.GTTT    | 14 | 148890663 | 148890681 | 4.75    | .                  | .     | intergenic | -0.085 | rs788940214     | 2 |
| AAAT.ATTT    | 14 | 149238217 | 149238236 | 5       | .                  | .     | intergenic | -0.048 | rs791138178     | 2 |
| AG.CT        | 14 | 149570043 | 149570060 | 9       | .                  | .     | intergenic | 0.303  | .               | 4 |
| AAGG.CCTT    | 14 | 150784352 | 150784369 | 4.5     | ENSSSCT00000011768 | MGMT  | intron     | .      | rs329277 rs7925 | 2 |
| AAC.GTT      | 14 | 150836535 | 150836548 | 4.66667 | ENSSSCT00000011768 | MGMT  | intron     | .      | rs789294994     | 3 |
| AC.GT        | 14 | 151168207 | 151168216 | 5       | .                  | .     | intergenic | -0.302 | .               | 2 |
| AC.GT        | 14 | 151409919 | 151409930 | 6       | .                  | .     | intergenic | -0.086 | rs697147015     | 2 |
| AC.GT        | 14 | 151415410 | 151415420 | 5.5     | .                  | .     | intergenic | .      | rs790433291     | 3 |
| AC.GT        | 14 | 151486359 | 151486372 | 7       | .                  | .     | intergenic | -0.236 | rs792011147     | 3 |
| AG.CT        | 14 | 151532287 | 151532303 | 8.5     | .                  | .     | intergenic | .      | rs129718 rs7873 | 3 |
| AAAC.GTTT    | 14 | 153137638 | 153137654 | 4.25    | ENSSSCT00000011784 | KNDC1 | intron     | .      | rs208650 rs7877 | 2 |
| AAAC.GTTT    | 15 | 161163    | 161182    | 5       | .                  | .     | intergenic | 0.034  | rs791935134     | 2 |
| AAAC.GTTT    | 15 | 212488    | 212502    | 3.75    | .                  | .     | intergenic | .      | rs789856867     | 3 |
| AAAAAC.GTTTT | 15 | 240548    | 240566    | 3.16667 | .                  | .     | intergenic | -0.015 | rs787791742     | 2 |
| AAAAT.ATTTT  | 15 | 790821    | 790836    | 3.2     | .                  | .     | intergenic | .      | rs793766940     | 2 |
| AT.AT        | 15 | 1029658   | 1029668   | 5.5     | .                  | .     | intergenic | 0.478  | rs789380752     | 2 |
| AAAAC.GTTTT  | 15 | 1043446   | 1043470   | 5       | .                  | .     | intergenic | 0.039  | rs789744071     | 2 |
| AC.GT        | 15 | 1154286   | 1154301   | 8       | .                  | .     | intergenic | 0.297  | .               | 2 |
| AC.GT        | 15 | 1365403   | 1365415   | 6.5     | .                  | .     | intergenic | 0.187  | rs787129316     | 4 |
| AACAC.GTGT   | 15 | 1419055   | 1419070   | 3.2     | .                  | .     | intergenic | -0.048 | rs781686 rs7869 | 2 |
| ATC.GAT      | 15 | 1807007   | 1807027   | 7       | .                  | .     | intergenic | 0.132  | rs793696946     | 2 |
| AG.CT        | 15 | 2429787   | 2429797   | 5.5     | .                  | .     | intergenic | -0.149 | rs793734884     | 2 |
| AAAT.ATTT    | 15 | 2598638   | 2598655   | 4.5     | .                  | .     | intergenic | 0.544  | rs793647362     | 3 |
| AT.AT        | 15 | 2622808   | 2622823   | 8       | .                  | .     | intergenic | 0.367  | rs313607 rs7906 | 2 |
| AG.CT        | 15 | 2721470   | 2721481   | 6       | .                  | .     | intergenic | 0.106  | .               | 2 |
| AG.CT        | 15 | 2755595   | 2755606   | 6       | ENSSSCT00000023118 | KIF5C | intron     | -0.066 | rs319729 rs7911 | 2 |
| AG.CT        | 15 | 2827275   | 2827285   | 5.5     | ENSSSCT00000023118 | KIF5C | intron     | 1.638  | .               | 3 |
| AC.GT        | 15 | 2829785   | 2829811   | 13.5    | ENSSSCT00000023118 | KIF5C | intron     | -0.604 | rs791744435     | 2 |
| AT.AT        | 15 | 3009046   | 3009056   | 5.5     | ENSSSCT00000028524 | .     | intron     | 0.2    | rs707442548     | 2 |
| AAAT.ATTT    | 15 | 3289469   | 3289484   | 4       | .                  | .     | intergenic | .      | rs790750869     | 2 |
| AAAT.ATTT    | 15 | 3331183   | 3331200   | 4.5     | .                  | .     | intergenic | 0.738  | rs791678594     | 2 |
| AAAC.GTTT    | 15 | 3558394   | 3558410   | 4.25    | .                  | .     | intergenic | .      | rs791923080     | 2 |
| AAAT.ATTT    | 15 | 3734152   | 3734167   | 4       | .                  | .     | intergenic | 0.249  | .               | 2 |
| AT.AT        | 15 | 3744124   | 3744142   | 9.5     | .                  | .     | intergenic | 0.203  | rs788458313     | 4 |
| AT.AT        | 15 | 3838006   | 3838017   | 6       | ENSSSCT00000017067 | ACVR2 | intron     | 0.054  | rs788413974     | 2 |
| AC.GT        | 15 | 3914338   | 3914359   | 11      | .                  | .     | intergenic | 0.236  | rs786494723     | 2 |
| AT.AT        | 15 | 3970620   | 3970630   | 5.5     | .                  | .     | intergenic | 0.458  | rs754345 rs7886 | 2 |
| AATG.CATT    | 15 | 4436490   | 4436506   | 4.25    | .                  | .     | intergenic | 0.05   | rs790933998     | 3 |
| AAG.CTT      | 15 | 4703298   | 4703309   | 4       | .                  | .     | intergenic | .      | rs790644887     | 2 |
| AC.GT        | 15 | 4869811   | 4869827   | 8.5     | .                  | .     | intergenic | 0.06   | rs790296310     | 2 |
| AGAT.ATCT    | 15 | 4877175   | 4877188   | 3.5     | .                  | .     | intergenic | -0.192 | rs790258735     | 2 |
| AAAAC.GTTTT  | 15 | 5015885   | 5015908   | 4.8     | .                  | .     | intergenic | -0.044 | rs787723120     | 2 |
| AAAC.GTTT    | 15 | 5402904   | 5402922   | 4.75    | .                  | .     | intergenic | 0.05   | rs247327 rs7866 | 3 |
| AAT.ATT      | 15 | 5454254   | 5454279   | 8.66667 | .                  | .     | intergenic | 0.014  | .               | 2 |
| AAAC.GTTT    | 15 | 5508752   | 5508766   | 3.75    | .                  | .     | intergenic | 0.157  | rs788112281     | 3 |
| AAAT.ATTT    | 15 | 5652854   | 5652872   | 4.75    | .                  | .     | intergenic | -0.041 | rs786685259     | 2 |
| AAAT.ATTT    | 15 | 5655216   | 5655240   | 6.25    | .                  | .     | intergenic | .      | rs316864 rs7876 | 2 |
| AAAT.ATTT    | 15 | 5744516   | 5744536   | 5.25    | .                  | .     | intergenic | -0.004 | rs786431934     | 2 |
| AAGG.CCTT    | 15 | 5854793   | 5854820   | 7       | .                  | .     | intergenic | -0.244 | rs792965161     | 2 |
| AG.CT        | 15 | 5934573   | 5934582   | 5       | .                  | .     | intergenic | 0.054  | rs793591991     | 2 |
| AAC.GTT      | 15 | 6140860   | 6140879   | 6.66667 | .                  | .     | intergenic | -0.129 | rs787161988     | 3 |
| AT.AT        | 15 | 6344033   | 6344043   | 5.5     | .                  | .     | intergenic | 0.084  | rs792479545     | 2 |
| AAC.GTT      | 15 | 6344195   | 6344214   | 6.66667 | .                  | .     | intergenic | 0.142  | rs789287243     | 2 |
| AG.CT        | 15 | 6499505   | 6499516   | 6       | .                  | .     | intergenic | .      | rs158206 rs7897 | 3 |
| AT.AT        | 15 | 6555027   | 6555036   | 5       | .                  | .     | intergenic | -0.065 | rs786910854     | 3 |
| AAAC.GTTT    | 15 | 6759992   | 6760007   | 4       | .                  | .     | intergenic | .      | rs393513 rs7910 | 2 |
| AAAT.ATTT    | 15 | 6821870   | 6821886   | 4.25    | .                  | .     | intergenic | -0.033 | rs380831 rs7925 | 2 |
| AC.GT        | 15 | 6836364   | 6836382   | 9.5     | .                  | .     | intergenic | 0.083  | .               | 2 |
| AC.GT        | 15 | 6846291   | 6846303   | 6.5     | .                  | .     | intergenic | 0.075  | rs792903518     | 2 |
| AG.CT        | 15 | 6975497   | 6975507   | 5.5     | .                  | .     | intergenic | 0.886  | rs787195071     | 3 |
| AC.GT        | 15 | 7121414   | 7121425   | 6       | .                  | .     | intergenic | -0.021 | .               | 2 |
| AAAAAG.CTTTT | 15 | 7225354   | 7225374   | 3.5     | .                  | .     | intergenic | 0.746  | .               | 3 |
| AT.AT        | 15 | 7264731   | 7264742   | 6       | .                  | .     | intergenic | -0.101 | rs175406 rs7938 | 4 |
| AAAC.GTTT    | 15 | 7289148   | 7289169   | 5.5     | .                  | .     | intergenic | 0.284  | rs787384045     | 2 |
| AAAAC.GTTTT  | 15 | 7322024   | 7322048   | 5       | .                  | .     | intergenic | 0.14   | rs787757442     | 2 |
| AAGG.CCTT    | 15 | 7333352   | 7333367   | 4       | .                  | .     | intergenic | 0.64   | rs373375 rs7893 | 2 |
| AAAAC.GTTTT  | 15 | 7335323   | 7335352   | 6       | .                  | .     | intergenic | .      | rs789821232     | 2 |
| AAC.GTT      | 15 | 7485500   | 7485518   | 6.33333 | .                  | .     | intergenic | 0.113  | .               | 4 |
| AAAAAC.GTTTT | 15 | 7527112   | 7527141   | 5       | .                  | .     | intergenic | 0.054  | .               | 2 |
| AG.CT        | 15 | 7549362   | 7549377   | 8       | .                  | .     | intergenic | 0.019  | .               | 3 |
| AAAAC.GTTTT  | 15 | 7590331   | 7590359   | 5.8     | .                  | .     | intergenic | 0.56   | rs791293089     | 2 |
| AT.AT        | 15 | 7664756   | 7664774   | 9.5     | .                  | .     | intergenic | 0.315  | rs786723364     | 2 |
| AAAT.ATTT    | 15 | 8563937   | 8563957   | 5.25    | ENSSSCT00000017069 | GTDC1 | intron     | 0.31   | rs787514427     | 2 |
| AT.AT        | 15 | 8867917   | 8867927   | 5.5     | ENSSSCT00000027823 | .     | intron     | 1.516  | .               | 3 |
| AG.CT        | 15 | 8882348   | 8882357   | 5       | ENSSSCT00000027823 | .     | intron     | 0.73   | rs788038404     | 2 |
| AAAC.GTTT    | 15 | 8891178   | 8891195   | 4.5     | ENSSSCT00000027823 | .     | intron     | 1.014  | rs786247219     | 2 |
| AATG.CATT    | 15 | 9076648   | 9076677   | 7.5     | ENSSSCT00000017070 | .     | intron     | -0.043 | rs393333 rs7918 | 2 |

|             |    |          |          |         |                    |          |            |        |                 |   |
|-------------|----|----------|----------|---------|--------------------|----------|------------|--------|-----------------|---|
| AT.AT       | 15 | 9096196  | 9096212  | 8.5     | ENSSSCT00000017070 | .        | intron     | .      | .               | 2 |
| AAAC.GTTT   | 15 | 9196573  | 9196584  | 3       | ENSSSCT00000017070 | .        | intron     | 1.308  | rs788200412     | 2 |
| AC.GT       | 15 | 9588167  | 9588190  | 12      | .                  | .        | intergenic | -0.057 | .               | 4 |
| AAAC.GTTT   | 15 | 9628528  | 9628539  | 3       | ENSSSCT00000017072 | KYNU     | intron     | 0.069  | 163914 rs7862   | 2 |
| AAG.CTT     | 15 | 9894703  | 9894714  | 4       | .                  | .        | intergenic | .      | 187505 rs7931   | 2 |
| AT.AT       | 15 | 9929113  | 9929125  | 6.5     | .                  | .        | intergenic | 0.019  | rs790617741     | 3 |
| AAAAT.ATTTT | 15 | 10004594 | 10004608 | 3       | .                  | .        | intergenic | .      | rs793127213     | 2 |
| AC.GT       | 15 | 10436658 | 10436680 | 11.5    | .                  | .        | intergenic | 0.092  | .               | 4 |
| AAC.GTT     | 15 | 10446699 | 10446714 | 5.33333 | .                  | .        | intergenic | 1.538  | rs86188 rs7928  | 2 |
| AC.GT       | 15 | 10735343 | 10735365 | 11.5    | .                  | .        | intergenic | .      | rs793166489     | 2 |
| AT.AT       | 15 | 10761545 | 10761564 | 10      | .                  | .        | intergenic | 0.122  | rs786424310     | 2 |
| AC.GT       | 15 | 11113986 | 11114002 | 8.5     | .                  | .        | intergenic | -0.125 | rs793172882     | 3 |
| ACAT.ATGT   | 15 | 11238617 | 11238632 | 4       | .                  | .        | intergenic | -0.189 | rs793622745     | 2 |
| AAAC.GTTT   | 15 | 11274324 | 11274363 | 10      | .                  | .        | intergenic | -0.092 | rs791507954     | 2 |
| AC.GT       | 15 | 12600292 | 12600306 | 7.5     | .                  | .        | intergenic | .      | rs108014 rs6992 | 4 |
| AC.GT       | 15 | 12710618 | 12710627 | 5       | .                  | .        | intergenic | -0.169 | .               | 3 |
| AAAC.GTTT   | 15 | 12760774 | 12760789 | 4       | .                  | .        | intergenic | -0.182 | rs793519326     | 2 |
| AG.CT       | 15 | 13002516 | 13002547 | 16      | ENSSSCT00000017081 | .        | intron     | -0.233 | rs792712312     | 2 |
| AAT.ATT     | 15 | 13014687 | 13014708 | 7.33333 | ENSSSCT00000017081 | .        | intron     | -0.11  | rs789218785     | 2 |
| AT.AT       | 15 | 13047546 | 13047559 | 7       | .                  | .        | intergenic | 0.207  | rs788810728     | 4 |
| AAAC.GTTT   | 15 | 13064361 | 13064385 | 6.25    | .                  | .        | intergenic | 0.138  | rs787913386     | 2 |
| AG.CT       | 15 | 13223439 | 13223449 | 5.5     | .                  | .        | intergenic | -0.101 | rs711487972     | 3 |
| AC.GT       | 15 | 13572389 | 13572401 | 6.5     | .                  | .        | intergenic | -0.22  | rs793418767     | 2 |
| AT.AT       | 15 | 13705298 | 13705309 | 6       | .                  | .        | intergenic | 0.097  | rs789386808     | 3 |
| AAAG.CTTT   | 15 | 13753457 | 13753479 | 5.75    | .                  | .        | intergenic | -0.058 | rs195666 rs7890 | 2 |
| AAAT.ATTT   | 15 | 13817342 | 13817371 | 7.5     | .                  | .        | intergenic | 0.144  | rs792267453     | 2 |
| AC.CT       | 15 | 14003157 | 14003168 | 6       | .                  | .        | intergenic | 0.072  | rs790352246     | 2 |
| AG.CT       | 15 | 14397991 | 14398001 | 5.5     | .                  | .        | intergenic | .      | rs792386792     | 2 |
| AC.GT       | 15 | 14414818 | 14414833 | 8       | .                  | .        | intergenic | -0.009 | rs788782183     | 4 |
| AAAAT.ATTTT | 15 | 14451713 | 14451732 | 4       | .                  | .        | intergenic | 0.026  | rs787065318     | 2 |
| AAG.CTT     | 15 | 14915434 | 14915447 | 4.66667 | .                  | .        | intergenic | -0.029 | rs356832 rs7925 | 2 |
| AC.GT       | 15 | 15057337 | 15057354 | 9       | .                  | .        | intergenic | .      | rs791310832     | 2 |
| AC.GT       | 15 | 15124184 | 15124198 | 7.5     | .                  | .        | intergenic | -0.153 | rs361603 rs7929 | 2 |
| AT.AT       | 15 | 15313580 | 15313591 | 6       | ENSSSCT00000017083 | SPOPL    | intron     | 0.178  | rs792737168     | 2 |
| AAAC.GTTT   | 15 | 15364312 | 15364339 | 7       | .                  | .        | intergenic | 0.065  | rs204587 rs7895 | 2 |
| AAAC.GTTT   | 15 | 15913072 | 15913091 | 5       | .                  | .        | intergenic | 0.113  | rs787877386     | 2 |
| AG.CT       | 15 | 15924426 | 15924436 | 5.5     | .                  | .        | intergenic | .      | .               | 2 |
| AAC.GTT     | 15 | 16138137 | 16138157 | 7       | .                  | .        | intergenic | .      | rs793742344     | 2 |
| AC.GT       | 15 | 16198155 | 16198167 | 6.5     | .                  | .        | intergenic | -0.181 | .               | 4 |
| AAAC.GTTT   | 15 | 16217770 | 16217786 | 4.25    | .                  | .        | intergenic | 0.138  | rs791817720     | 2 |
| AG.CT       | 15 | 16237369 | 16237386 | 9       | .                  | .        | intergenic | .      | rs357870 rs7922 | 2 |
| AAC.GTT     | 15 | 16450428 | 16450443 | 5.33333 | .                  | .        | intergenic | 0.145  | rs385449 rs7924 | 2 |
| AAC.GTT     | 15 | 16489858 | 16489871 | 4.66667 | .                  | .        | intergenic | 0.459  | rs320542 rs7875 | 3 |
| AC.GT       | 15 | 16507307 | 16507317 | 5.5     | .                  | .        | intergenic | -0.319 | rs328008 rs7933 | 2 |
| AG.CT       | 15 | 16595245 | 16595261 | 8.5     | .                  | .        | intergenic | 0.077  | .               | 2 |
| AGAT.ATCT   | 15 | 16619836 | 16619863 | 7       | .                  | .        | intergenic | -0.116 | rs356436 rs7918 | 2 |
| AG.CT       | 15 | 16688198 | 16688207 | 5       | .                  | .        | intergenic | .      | .               | 2 |
| AAAC.GTTT   | 15 | 16703889 | 16703909 | 5.25    | .                  | .        | intergenic | 0.108  | rs386328 rs7876 | 2 |
| AAAC.GTTT   | 15 | 16770737 | 16770759 | 5.75    | .                  | .        | intergenic | 0.156  | rs793732807     | 2 |
| AAAC.GTTT   | 15 | 16965605 | 16965624 | 5       | .                  | .        | intergenic | -0.158 | rs307310 rs7869 | 2 |
| AT.AT       | 15 | 17119360 | 17119370 | 5.5     | .                  | .        | intergenic | .      | rs793674413     | 2 |
| AAT.ATT     | 15 | 17161874 | 17161887 | 4.66667 | .                  | .        | intergenic | 0.115  | rs788521192     | 2 |
| AT.AT       | 15 | 17395174 | 17395195 | 11      | .                  | .        | intergenic | 0.062  | rs791049410     | 2 |
| AT.AT       | 15 | 17520820 | 17520829 | 5       | .                  | .        | intergenic | -0.004 | rs791190860     | 2 |
| AAAT.ATTT   | 15 | 17567963 | 17567980 | 4.5     | .                  | .        | intergenic | .      | rs792425936     | 2 |
| AAAAC.GTTTT | 15 | 17734467 | 17734506 | 8       | .                  | .        | intergenic | 0.204  | rs379135 rs7896 | 2 |
| AG.CT       | 15 | 18089572 | 18089581 | 5       | .                  | .        | intergenic | 0.077  | .               | 3 |
| AAAAC.GTTTT | 15 | 18206178 | 18206206 | 5.8     | .                  | .        | intergenic | 0.255  | rs788316744     | 2 |
| AT.AT       | 15 | 18783143 | 18783160 | 9       | ENSSSCT00000017092 | R3HDM1   | intron     | 0.073  | rs788412391     | 2 |
| AC.GT       | 15 | 18956024 | 18956037 | 7       | .                  | .        | intergenic | 0.232  | rs789947965     | 3 |
| AAAAT.ATTTT | 15 | 18969836 | 18969860 | 5       | .                  | .        | intergenic | 0.528  | rs339219 rs7905 | 2 |
| AAT.ATT     | 15 | 18985220 | 18985231 | 4       | .                  | .        | intergenic | .      | rs691986805     | 3 |
| AAAAC.GTTTT | 15 | 19072232 | 19072260 | 5.8     | ENSSSCT00000017094 | ZRANB3   | intron     | .      | rs793172458     | 2 |
| AAC.GTT     | 15 | 19089584 | 19089597 | 4.66667 | ENSSSCT00000017094 | ZRANB3   | intron     | 0.23   | rs787457884     | 2 |
| AAC.GTT     | 15 | 19264470 | 19264487 | 6       | ENSSSCT00000017095 | RAB3GAP1 | intron     | 0.204  | rs791037470     | 2 |
| AAAT.ATTT   | 15 | 19359558 | 19359580 | 5.75    | .                  | .        | intergenic | .      | rs790023183     | 4 |
| AAAC.GTTT   | 15 | 19385971 | 19385995 | 6.25    | ENSSSCT00000017096 | MAP3K19  | intron     | 0.494  | rs368349 rs7915 | 2 |
| AAC.GTT     | 15 | 19441378 | 19441389 | 4       | ENSSSCT00000017097 | CCNT2    | intron     | 0.392  | rs787591063     | 2 |
| AAAT.ATTT   | 15 | 19466235 | 19466256 | 5.5     | ENSSSCT00000017097 | CCNT2    | intron     | -0.099 | rs793224032     | 2 |
| AGC.GCT     | 15 | 19941803 | 19941819 | 5.66667 | ENSSSCT00000017100 | .        | intron     | -0.082 | rs789684041     | 2 |
| AGC.GCT     | 15 | 19941803 | 19941819 | 5.66667 | ENSSSCT00000036620 | .        | intron     | -0.082 | rs789684041     | 2 |
| AGC.GCT     | 15 | 19941803 | 19941819 | 5.66667 | ENSSSCT00000034389 | .        | intron     | -0.082 | rs789684041     | 2 |
| AT.AT       | 15 | 21315368 | 21315377 | 5       | .                  | .        | intergenic | -0.021 | rs786979248     | 2 |
| AAAAC.GTTTT | 15 | 21427583 | 21427608 | 5.2     | ENSSSCT00000031658 | .        | intron     | -0.073 | rs793092527     | 2 |
| AAC.GTT     | 15 | 21540971 | 21540984 | 4.66667 | .                  | .        | intergenic | -0.098 | rs337975 rs7920 | 2 |
| AAT.ATT     | 15 | 21692422 | 21692450 | 9.66667 | .                  | .        | intergenic | -0.091 | .               | 2 |
| AC.GT       | 15 | 21694496 | 21694507 | 6       | .                  | .        | intergenic | -0.131 | rs786492165     | 2 |
| AC.GT       | 15 | 22189143 | 22189152 | 5       | .                  | .        | intergenic | 0.086  | .               | 3 |
| ATC.GAT     | 15 | 22344590 | 22344609 | 6.66667 | .                  | .        | intergenic | -0.031 | rs793733994     | 2 |
| AAAC.GTTT   | 15 | 22426468 | 22426487 | 5       | .                  | .        | intergenic | 0.068  | rs789863994     | 2 |
| AAAC.GTTT   | 15 | 22649228 | 22649245 | 4.5     | .                  | .        | intergenic | .      | rs792610614     | 2 |
| AAAG.CTTT   | 15 | 22699815 | 22699832 | 4.5     | .                  | .        | intergenic | 0.099  | .               | 2 |
| AAAC.GTTT   | 15 | 22815052 | 22815086 | 8.75    | .                  | .        | intergenic | 0.321  | rs787300278     | 3 |
| AAT.ATT     | 15 | 22848562 | 22848575 | 4.66667 | .                  | .        | intergenic | 0.071  | rs792225614     | 2 |

|             |    |          |          |         |                    |         |            |        |                    |   |
|-------------|----|----------|----------|---------|--------------------|---------|------------|--------|--------------------|---|
| AT.AT       | 15 | 22853859 | 22853868 | 5       | .                  | .       | intergenic | -0.271 | .                  | 3 |
| AG.CT       | 15 | 22890843 | 22890856 | 7       | .                  | .       | intergenic | -0.161 | rs712694662        | 3 |
| AC.GT       | 15 | 23018730 | 23018741 | 6       | .                  | .       | intergenic | .      | .                  | 2 |
| AAAG.CTTT   | 15 | 23141240 | 23141262 | 5.75    | .                  | .       | intergenic | 0.09   | rs788325089        | 2 |
| AATG.CATT   | 15 | 23250661 | 23250676 | 4       | .                  | .       | intergenic | -0.104 | rs789892012        | 2 |
| AAAG.CTTT   | 15 | 23271564 | 23271581 | 4.5     | .                  | .       | intergenic | .      | rs786983271        | 2 |
| AC.GT       | 15 | 23460904 | 23460918 | 7.5     | .                  | .       | intergenic | -0.22  | .                  | 3 |
| AC.GT       | 15 | 23731154 | 23731164 | 5.5     | .                  | .       | intergenic | 0.277  | rs791871003        | 2 |
| AT.AT       | 15 | 24340953 | 24340962 | 5       | .                  | .       | intergenic | 0.066  | rs788059585        | 3 |
| AAAAT.ATTTT | 15 | 24522928 | 24522944 | 3.4     | .                  | .       | intergenic | 0.025  | rs787779848        | 2 |
| AT.AT       | 15 | 24540570 | 24540579 | 5       | .                  | .       | intergenic | -0.066 | rs789408810        | 2 |
| AAAAT.ATTTT | 15 | 24623049 | 24623063 | 3       | ENSSSCT00000031946 | .       | intron     | 0.198  | rs789946961        | 2 |
| AT.AT       | 15 | 24647456 | 24647471 | 8       | ENSSSCT00000031946 | .       | intron     | .      | .                  | 2 |
| AAAT.ATTT   | 15 | 24647858 | 24647880 | 5.75    | ENSSSCT00000031946 | .       | intron     | .      | rs788046773        | 2 |
| AC.GT       | 15 | 24710157 | 24710184 | 14      | ENSSSCT00000031946 | .       | intron     | 0.069  | rs792296320        | 2 |
| AG.CT       | 15 | 24744644 | 24744657 | 7       | .                  | .       | intergenic | -0.12  | rs790991562        | 2 |
| AC.GT       | 15 | 24895452 | 24895463 | 6       | .                  | .       | intergenic | -0.059 | .                  | 3 |
| ACAT.ATGT   | 15 | 25095122 | 25095136 | 3.75    | .                  | .       | intergenic | -0.082 | rs789442542        | 2 |
| AT.AT       | 15 | 25181235 | 25181246 | 6       | .                  | .       | intergenic | .      | rs789433787        | 3 |
| AC.GT       | 15 | 25253547 | 25253558 | 6       | ENSSSCT00000017111 | DPP10   | intron     | -0.088 | .                  | 3 |
| CACCC.GGGTG | 15 | 25464762 | 25464783 | 3.66667 | .                  | .       | intergenic | .      | rs789887254        | 2 |
| AAAC.GTTT   | 15 | 25562580 | 25562593 | 3.5     | .                  | .       | intergenic | .      | 102900 rs7866      | 2 |
| AAC.GTT     | 15 | 25911971 | 25911986 | 5.33333 | .                  | .       | intergenic | 0.074  | rs788380040        | 2 |
| AC.GT       | 15 | 25944999 | 25945019 | 10.5    | .                  | .       | intergenic | .      | .                  | 3 |
| AGAT.ATCT   | 15 | 26261522 | 26261542 | 5.25    | .                  | .       | intergenic | 0.296  | rs788168321        | 2 |
| AG.CT       | 15 | 26285265 | 26285278 | 7       | .                  | .       | intergenic | .      | .                  | 2 |
| AAATT.AATTT | 15 | 26351946 | 26351970 | 5       | .                  | .       | intergenic | 0.084  | rs789425375        | 2 |
| AAAC.GTTT   | 15 | 26365778 | 26365797 | 5       | .                  | .       | intergenic | -0.063 | rs787195877        | 2 |
| ACAT.ATGT   | 15 | 26788373 | 26788388 | 4       | .                  | .       | intergenic | 0.111  | rs789305 rs7913    | 2 |
| ACAG.CTGT   | 15 | 26804286 | 26804307 | 5.5     | ENSSSCT00000025125 | .       | promoter   | -0.07  | rs7875 rs7875      | 2 |
| ACAG.CTGT   | 15 | 26804286 | 26804307 | 5.5     | ENSSSCT00000025310 | .       | promoter   | -0.07  | rs7875 rs7875      | 2 |
| ACAG.CTGT   | 15 | 26804286 | 26804307 | 5.5     | ENSSSCT00000017112 | .       | promoter   | -0.07  | rs7875 rs7875      | 2 |
| AT.AT       | 15 | 26810048 | 26810065 | 9       | ENSSSCT00000025125 | .       | intron     | -0.039 | rs7882 rs7882      | 2 |
| AT.AT       | 15 | 26810048 | 26810065 | 9       | ENSSSCT00000025310 | .       | intron     | -0.039 | rs7882 rs7882      | 2 |
| AT.AT       | 15 | 26810048 | 26810065 | 9       | ENSSSCT00000017112 | .       | intron     | -0.039 | rs7882 rs7882      | 2 |
| ACC.GGT     | 15 | 26936676 | 26936694 | 6.33333 | ENSSSCT00000017114 | CCDC93  | intron     | 0.041  | rs789820615        | 2 |
| AAAG.CTTT   | 15 | 27209091 | 27209105 | 3.75    | .                  | .       | intergenic | 0.023  | .                  | 2 |
| AT.AT       | 15 | 27233535 | 27233545 | 5.5     | .                  | .       | intergenic | .      | rs786638684        | 2 |
| AAAT.ATTT   | 15 | 27686569 | 27686589 | 5.25    | .                  | .       | intergenic | -0.056 | rs786400497        | 2 |
| AG.CT       | 15 | 28145090 | 28145105 | 8       | ENSSSCT00000034415 | MARCO   | intron     | 0.266  | rs789921818        | 2 |
| AG.CT       | 15 | 28145090 | 28145105 | 8       | ENSSSCT00000017116 | MARCO   | intron     | 0.266  | rs789921818        | 2 |
| AAAG.CTTT   | 15 | 28230882 | 28230908 | 6.75    | .                  | .       | intergenic | .      | rs792062396        | 2 |
| AGG.CCT     | 15 | 28330701 | 28330714 | 4.66667 | .                  | .       | intergenic | -0.253 | rs793740672        | 2 |
| AAAC.GTTT   | 15 | 28530885 | 28530908 | 6       | ENSSSCT00000017118 | C2orf76 | intron     | 0.313  | .                  | 2 |
| AAAC.GTTT   | 15 | 28539153 | 28539171 | 4.75    | ENSSSCT00000017118 | C2orf76 | intron     | 0.202  | rs791125899        | 2 |
| AAAC.GTTT   | 15 | 28597437 | 28597456 | 5       | .                  | .       | intergenic | -0.207 | rs791799615        | 2 |
| AAT.ATT     | 15 | 28715045 | 28715065 | 7       | .                  | .       | intergenic | 0.135  | rs787359478        | 4 |
| AAAAC.GTTTT | 15 | 28739359 | 28739377 | 3.16667 | .                  | .       | intergenic | 0.216  | rs791502899        | 2 |
| AAAC.GTTT   | 15 | 28797671 | 28797701 | 7.75    | ENSSSCT00000030086 | MAP3K2  | intron     | .      | rs787242923        | 2 |
| AC.GT       | 15 | 28850198 | 28850208 | 5.5     | ENSSSCT00000022881 | MAP3K2  | intron     | -0.027 | .                  | 4 |
| AC.GT       | 15 | 28850198 | 28850208 | 5.5     | ENSSSCT00000030086 | MAP3K2  | intron     | -0.027 | .                  | 4 |
| AAAT.ATTT   | 15 | 28902746 | 28902764 | 4.75    | ENSSSCT00000017121 | ERCC3   | intron     | -0.058 | rs792734504 rs7927 | 2 |
| AC.GT       | 15 | 28917033 | 28917053 | 10.5    | .                  | .       | intergenic | .      | rs792890847        | 3 |
| AT.AT       | 15 | 28918431 | 28918443 | 6.5     | .                  | .       | intergenic | -0.072 | rs792548042        | 2 |
| AAT.ATT     | 15 | 28980779 | 28980791 | 4.33333 | .                  | .       | intergenic | -0.188 | rs793114068        | 2 |
| AGC.GCT     | 15 | 28983598 | 28983611 | 4.66667 | .                  | .       | intergenic | -0.038 | rs709651006        | 2 |
| AAC.GTT     | 15 | 29233015 | 29233037 | 7.66667 | .                  | .       | intergenic | .      | rs795472 rs7906    | 2 |
| AAAT.ATTT   | 15 | 29299267 | 29299286 | 5       | .                  | .       | intergenic | .      | rs794866 rs7877    | 2 |
| AAAT.ATTT   | 15 | 29819983 | 29820002 | 5       | .                  | .       | intergenic | .      | rs787617 rs7879    | 3 |
| AC.GT       | 15 | 29838158 | 29838179 | 11      | .                  | .       | intergenic | -0.032 | rs79270888 rs7898  | 2 |
| ATC.GAT     | 15 | 29977999 | 29978017 | 6.33333 | .                  | .       | intergenic | 0.016  | rs792792009258     | 2 |
| AT.AT       | 15 | 29995151 | 29995162 | 6       | .                  | .       | intergenic | .      | rs7905197599       | 2 |
| AC.GT       | 15 | 30004710 | 30004719 | 5       | .                  | .       | intergenic | .      | rs789239408        | 2 |
| AC.GT       | 15 | 30202575 | 30202590 | 8       | .                  | .       | intergenic | -0.257 | .                  | 2 |
| AT.AT       | 15 | 30244464 | 30244475 | 6       | .                  | .       | intergenic | .      | rs79113731 rs7928  | 4 |
| AAAC.GTTT   | 15 | 30987917 | 30987933 | 4.25    | .                  | .       | intergenic | -0.285 | rs790916410        | 2 |
| AAAC.GTTT   | 15 | 31054854 | 31054881 | 7       | .                  | .       | intergenic | -0.105 | rs793728658        | 2 |
| AAAAG.CTTTT | 15 | 31060959 | 31060978 | 4       | .                  | .       | intergenic | -0.219 | rs789376407        | 2 |
| AC.GT       | 15 | 31073298 | 31073310 | 6.5     | .                  | .       | intergenic | .      | rs787812618        | 3 |
| AAAC.GTTT   | 15 | 31261978 | 31261996 | 4.75    | ENSSSCT00000017126 | CNTNAP5 | intron     | 0.155  | rs786602637        | 3 |
| AAAAC.GTTTT | 15 | 31692702 | 31692724 | 4.6     | ENSSSCT00000017126 | CNTNAP5 | intron     | -0.2   | rs792579296        | 2 |
| AAAC.GTTT   | 15 | 31778204 | 31778227 | 6       | ENSSSCT00000017126 | CNTNAP5 | intron     | -0.051 | rs787199014        | 2 |
| AT.AT       | 15 | 31789870 | 31789880 | 5.5     | ENSSSCT00000017126 | CNTNAP5 | intron     | .      | rs789752598        | 2 |
| AAC.GTT     | 15 | 31791280 | 31791297 | 6       | ENSSSCT00000017126 | CNTNAP5 | intron     | .      | rs792704124        | 2 |
| AAC.GTT     | 15 | 31799601 | 31799619 | 6.33333 | ENSSSCT00000017126 | CNTNAP5 | intron     | -0.291 | .                  | 2 |
| AG.CT       | 15 | 32048796 | 32048813 | 9       | .                  | .       | intergenic | -0.188 | rs790587798        | 2 |
| AT.AT       | 15 | 32246906 | 32246918 | 6.5     | .                  | .       | intergenic | -0.198 | .                  | 4 |
| AAG.CTT     | 15 | 32262540 | 32262562 | 7.66667 | .                  | .       | intergenic | -0.192 | rs791287421        | 2 |
| AG.CT       | 15 | 32377213 | 32377223 | 5.5     | .                  | .       | intergenic | -0.253 | rs792528283        | 2 |
| AAAT.ATTT   | 15 | 32474928 | 32474949 | 5.5     | .                  | .       | intergenic | 0.012  | rs79005 rs7884     | 2 |
| AT.AT       | 15 | 32501864 | 32501875 | 6       | .                  | .       | intergenic | -0.244 | rs7881946 rs7889   | 3 |
| AC.GT       | 15 | 32576520 | 32576530 | 5.5     | .                  | .       | intergenic | 0.965  | .                  | 3 |
| AC.GT       | 15 | 32845492 | 32845508 | 8.5     | .                  | .       | intergenic | -0.171 | rs7919343 rs7873   | 2 |
| AAAAT.ATTTT | 15 | 32875764 | 32875782 | 3.8     | .                  | .       | intergenic | .      | rs789631890        | 2 |

|             |    |          |          |         |                    |         |            |        |               |   |
|-------------|----|----------|----------|---------|--------------------|---------|------------|--------|---------------|---|
| AT.AT       | 15 | 32938036 | 32938054 | 9.5     | .                  | .       | intergenic | .      | rs791873119   | 2 |
| AAAC.GTTT   | 15 | 33061663 | 33061681 | 4.75    | .                  | .       | intergenic | 0.33   | rs786707879   | 2 |
| AT.AT       | 15 | 33081552 | 33081564 | 6.5     | .                  | .       | intergenic | .      | 328966 rs7901 | 3 |
| AC.GT       | 15 | 33196554 | 33196568 | 7.5     | .                  | .       | intergenic | -0.221 | rs710349359   | 2 |
| AC.GT       | 15 | 33398421 | 33398435 | 7.5     | .                  | .       | intergenic | -0.145 | .             | 2 |
| AAAAT.ATTTT | 15 | 33521992 | 33522012 | 4.2     | .                  | .       | intergenic | .      | rs790147072   | 2 |
| AT.AT       | 15 | 33528714 | 33528724 | 5.5     | .                  | .       | intergenic | -0.152 | 147509 rs7938 | 2 |
| AT.AT       | 15 | 33588829 | 33588838 | 5       | .                  | .       | intergenic | .      | 353008 rs7892 | 2 |
| AAG.CTT     | 15 | 33594565 | 33594585 | 7       | .                  | .       | intergenic | -0.013 | 376656 rs7882 | 2 |
| AAC.GTT     | 15 | 33600967 | 33600983 | 5.66667 | .                  | .       | intergenic | -0.186 | 727670 rs7905 | 2 |
| AC.GT       | 15 | 33638937 | 33638952 | 8       | .                  | .       | intergenic | 0.004  | rs788696658   | 2 |
| ACCC.GGGT   | 15 | 34265011 | 34265022 | 3       | .                  | .       | intergenic | -0.151 | rs789193614   | 2 |
| AG.CT       | 15 | 34655965 | 34655974 | 5       | ENSSSCT00000017129 | TSN     | intron     | -0.344 | .             | 2 |
| AG.CT       | 15 | 34723875 | 34723893 | 9.5     | .                  | .       | intergenic | .      | .             | 5 |
| AAAT.ATTT   | 15 | 34750350 | 34750370 | 5.25    | ENSSSCT00000024092 | .       | intron     | .      | .             | 3 |
| AAC.GTT     | 15 | 34985711 | 34985728 | 6       | .                  | .       | intergenic | .      | rs789497981   | 2 |
| AG.CT       | 15 | 35040051 | 35040065 | 7.5     | ENSSSCT00000033491 | TFCP2L1 | intron     | -0.009 | 310178 rs7937 | 2 |
| AG.CT       | 15 | 35040051 | 35040065 | 7.5     | ENSSSCT00000017132 | TFCP2L1 | intron     | -0.009 | 310178 rs7937 | 2 |
| AG.CT       | 15 | 35040051 | 35040065 | 7.5     | ENSSSCT00000033811 | TFCP2L1 | intron     | -0.009 | 310178 rs7937 | 2 |
| AG.CT       | 15 | 35040051 | 35040065 | 7.5     | ENSSSCT00000033192 | TFCP2L1 | intron     | -0.009 | 310178 rs7937 | 2 |
| AAAAT.ATTTT | 15 | 35276732 | 35276758 | 5.4     | ENSSSCT00000017133 | GLI2    | intron     | -0.143 | 388237 rs7925 | 2 |
| AAAC.GTTT   | 15 | 35434600 | 35434623 | 6       | ENSSSCT00000023874 | .       | intron     | .      | rs786303132   | 2 |
| AAAAC.GTTTT | 15 | 35459594 | 35459614 | 4.2     | ENSSSCT00000023874 | .       | intron     | -0.156 | 248054 rs7889 | 2 |
| AAC.GTT     | 15 | 35534571 | 35534583 | 4.33333 | .                  | .       | intergenic | -0.276 | rs793312464   | 2 |
| AAG.CTT     | 15 | 35541628 | 35541642 | 5       | .                  | .       | intergenic | -0.124 | 326130 rs7903 | 2 |
| AATG.CATT   | 15 | 35627405 | 35627433 | 7.25    | .                  | .       | intergenic | -0.283 | rs788004041   | 2 |
| AG.CT       | 15 | 35767373 | 35767387 | 7.5     | .                  | .       | intergenic | 0.197  | rs790729071   | 2 |
| AC.GT       | 15 | 35955958 | 35955970 | 6.5     | .                  | .       | intergenic | 0.117  | .             | 2 |
| AAAC.GTTT   | 15 | 36104187 | 36104211 | 6.25    | .                  | .       | intergenic | 0.381  | rs788678908   | 2 |
| AAAAT.ATTTT | 15 | 36128622 | 36128642 | 4.2     | ENSSSCT00000017141 | .       | intron     | -0.283 | rs791953879   | 2 |
| ACC.GGT     | 15 | 36186107 | 36186120 | 4.66667 | .                  | .       | intergenic | -0.054 | 265959 rs7930 | 2 |
| AAAC.GTTT   | 15 | 36187265 | 36187283 | 4.75    | .                  | .       | intergenic | 0.159  | 242946 rs7876 | 2 |
| AT.AT       | 15 | 36262363 | 36262372 | 5       | .                  | .       | intergenic | .      | 179010 rs7895 | 2 |
| AAC.GTT     | 15 | 36504033 | 36504046 | 4.66667 | ENSSSCT00000025582 | .       | intron     | 0.126  | rs791030721   | 2 |
| AAAC.GTTT   | 15 | 36585619 | 36585652 | 8.5     | ENSSSCT00000027415 | .       | intron     | .      | rs698131914   | 2 |
| AAAAT.ATTTT | 15 | 36595568 | 36595582 | 3       | ENSSSCT00000027415 | .       | intron     | .      | rs788215203   | 2 |
| AAAC.GTTT   | 15 | 36700160 | 36700185 | 6.5     | .                  | .       | intergenic | .      | 350042 rs7904 | 2 |
| AAAG.CTTT   | 15 | 36800772 | 36800785 | 3.5     | .                  | .       | intergenic | .      | rs695180008   | 2 |
| AT.AT       | 15 | 36925683 | 36925697 | 7.5     | .                  | .       | intergenic | 0.199  | 104464 rs7875 | 3 |
| AC.GT       | 15 | 37435235 | 37435245 | 5.5     | .                  | .       | intergenic | -0.141 | .             | 2 |
| ACAC.GTGT   | 15 | 37531302 | 37531330 | 7.25    | .                  | .       | intergenic | .      | rs792825424   | 3 |
| AC.GT       | 15 | 37569972 | 37569986 | 7.5     | .                  | .       | intergenic | -0.1   | 383858 rs7913 | 4 |
| AAAAT.ATTTT | 15 | 37768573 | 37768595 | 4.6     | ENSSSCT00000027260 | CLN8    | promoter   | .      | rs789223789   | 2 |
| AC.GT       | 15 | 38069662 | 38069674 | 6.5     | ENSSSCT00000017147 | .       | promoter   | -0.085 | rs792367347   | 3 |
| AC.GT       | 15 | 38191070 | 38191117 | 24      | .                  | .       | intergenic | -0.342 | 271685 rs7927 | 2 |
| AAG.CTT     | 15 | 38683067 | 38683082 | 5.33333 | .                  | .       | intergenic | .      | 107144 rs7880 | 2 |
| AAC.GTT     | 15 | 39273023 | 39273036 | 4.66667 | ENSSSCT00000027445 | .       | intron     | -0.028 | rs792333727   | 2 |
| AT.AT       | 15 | 39298552 | 39298562 | 5.5     | ENSSSCT00000027445 | .       | intron     | -0.193 | rs791391460   | 3 |
| AAAAG.CTTTT | 15 | 39391651 | 39391675 | 5       | ENSSSCT00000017148 | CSMD1   | intron     | -0.05  | .             | 2 |
| AT.AT       | 15 | 39425276 | 39425289 | 7       | ENSSSCT00000017148 | CSMD1   | intron     | -0.491 | 146036 rs7871 | 3 |
| AGAT.ATCT   | 15 | 39699295 | 39699312 | 4.5     | .                  | .       | intergenic | -0.667 | 381747 rs7895 | 2 |
| ACAT.ATGT   | 15 | 40123336 | 40123355 | 5       | .                  | .       | intergenic | .      | 317965 rs7921 | 2 |
| AC.GT       | 15 | 40147194 | 40147204 | 5.5     | .                  | .       | intergenic | -0.183 | rs789835015   | 3 |
| AG.CT       | 15 | 40159987 | 40160001 | 7.5     | .                  | .       | intergenic | .      | 245674 rs7932 | 2 |
| AT.AT       | 15 | 40208836 | 40208851 | 8       | .                  | .       | intergenic | 0.798  | .             | 3 |
| AAT.ATT     | 15 | 40379790 | 40379803 | 4.66667 | .                  | .       | intergenic | -0.219 | rs793033774   | 4 |
| AT.AT       | 15 | 40415630 | 40415640 | 5.5     | .                  | .       | intergenic | -0.324 | 177111 rs7868 | 3 |
| AC.GT       | 15 | 40613189 | 40613214 | 13      | .                  | .       | intergenic | -0.063 | .             | 2 |
| AC.GT       | 15 | 40642590 | 40642601 | 6       | .                  | .       | intergenic | 0.028  | rs694550412   | 4 |
| AT.AT       | 15 | 40999136 | 40999145 | 5       | .                  | .       | intergenic | -0.228 | rs793692307   | 2 |
| ATC.GAT     | 15 | 41065086 | 41065104 | 6.33333 | .                  | .       | intergenic | -0.309 | rs788961115   | 2 |
| AT.AT       | 15 | 41069887 | 41069900 | 7       | .                  | .       | intergenic | -0.664 | rs788759025   | 4 |
| AT.AT       | 15 | 41076224 | 41076240 | 8.5     | .                  | .       | intergenic | -0.174 | rs790995808   | 4 |
| AC.GT       | 15 | 41156904 | 41156923 | 10      | .                  | .       | intergenic | -0.283 | rs793518350   | 2 |
| AC.GT       | 15 | 41219322 | 41219332 | 5.5     | .                  | .       | intergenic | -0.195 | .             | 3 |
| AT.AT       | 15 | 41255147 | 41255160 | 7       | .                  | .       | intergenic | -0.195 | rs787125306   | 4 |
| AT.AT       | 15 | 41531256 | 41531267 | 6       | .                  | .       | intergenic | -0.221 | 386251 rs7933 | 2 |
| AGG.CCT     | 15 | 41749311 | 41749324 | 4.66667 | .                  | .       | intergenic | -0.122 | 306130 rs7876 | 2 |
| AG.CT       | 15 | 41951219 | 41951231 | 6.5     | .                  | .       | intergenic | -0.915 | .             | 4 |
| AC.GT       | 15 | 42137545 | 42137554 | 5       | .                  | .       | intergenic | .      | 754307 rs7883 | 2 |
| AACAC.GTGT  | 15 | 42268096 | 42268114 | 3.8     | .                  | .       | intergenic | .      | rs793555802   | 2 |
| AAAG.CTTT   | 15 | 42689429 | 42689452 | 6       | ENSSSCT00000017154 | ANGPT2  | intron     | -0.514 | rs790353193   | 2 |
| AAC.GTT     | 15 | 42723940 | 42723951 | 4       | ENSSSCT00000017154 | ANGPT2  | intron     | -0.102 | .             | 4 |
| AAC.GTT     | 15 | 42723940 | 42723951 | 4       | ENSSSCT00000017155 | MCPH1   | intron     | -0.102 | .             | 4 |
| AAC.GTT     | 15 | 43316350 | 43316374 | 8.33333 | .                  | .       | intergenic | .      | 116613 rs7912 | 2 |
| AC.GT       | 15 | 43324537 | 43324546 | 5       | .                  | .       | intergenic | 0.292  | .             | 2 |
| AAC.GTT     | 15 | 43947562 | 43947575 | 4.66667 | ENSSSCT00000031639 | GPM6A   | intron     | .      | .             | 2 |
| AC.GT       | 15 | 43980139 | 43980148 | 5       | .                  | .       | intergenic | .      | .             | 3 |
| AAAT.ATTT   | 15 | 44386769 | 44386792 | 6       | ENSSSCT00000017167 | .       | intron     | -0.046 | .             | 2 |
| AG.CT       | 15 | 44514749 | 44514764 | 8       | .                  | .       | intergenic | .      | .             | 2 |
| AAC.GTT     | 15 | 44534727 | 44534756 | 10      | .                  | .       | intergenic | 0.235  | 182480 rs7919 | 4 |
| AC.GT       | 15 | 44704322 | 44704333 | 6       | .                  | .       | intergenic | -0.015 | rs788177221   | 2 |
| AAT.ATT     | 15 | 44989275 | 44989292 | 6       | .                  | .       | intergenic | .      | rs791319922   | 2 |
| AAAT.ATTT   | 15 | 44994312 | 44994324 | 3.25    | .                  | .       | intergenic | .      | rs789801838   | 2 |



|             |    |          |          |         |                    |          |            |        |               |   |
|-------------|----|----------|----------|---------|--------------------|----------|------------|--------|---------------|---|
| AC.GT       | 15 | 46075247 | 46075262 | 8       | .                  | .        | intergenic | -0.028 | 209062 rs7909 | 2 |
| AT.AT       | 15 | 46319525 | 46319536 | 6       | .                  | .        | intergenic | -0.273 | 397195 rs7873 | 2 |
| ACAG.CTGT   | 15 | 46455628 | 46455649 | 5.5     | .                  | .        | intergenic | -0.313 | rs792690199   | 2 |
| AAAC.GTTT   | 15 | 46506859 | 46506878 | 5       | .                  | .        | intergenic | .      | .             | 2 |
| AT.AT       | 15 | 46513735 | 46513745 | 5.5     | .                  | .        | intergenic | .      | rs787564632   | 2 |
| AC.GT       | 15 | 46540338 | 46540347 | 5       | .                  | .        | intergenic | -0.022 | .             | 3 |
| AT.AT       | 15 | 46621041 | 46621056 | 8       | .                  | .        | intergenic | 0.045  | rs788313054   | 3 |
| AT.AT       | 15 | 46646112 | 46646129 | 9       | .                  | .        | intergenic | -0.002 | rs787969229   | 2 |
| AAC.GTT     | 15 | 46905638 | 46905651 | 4.66667 | .                  | .        | intergenic | 0.069  | .             | 2 |
| AC.GT       | 15 | 47336824 | 47336836 | 6.5     | .                  | .        | intergenic | .      | .             | 3 |
| AAC.GTT     | 15 | 47453601 | 47453613 | 4.33333 | .                  | .        | intergenic | .      | rs789415994   | 2 |
| AAAC.GTTT   | 15 | 47681517 | 47681535 | 4.75    | .                  | .        | intergenic | -0.255 | rs708008271   | 2 |
| AG.CT       | 15 | 47739075 | 47739103 | 14.5    | .                  | .        | intergenic | -0.035 | 759423 rs7879 | 2 |
| AT.AT       | 15 | 47787898 | 47787917 | 10      | .                  | .        | intergenic | -0.142 | .             | 2 |
| AAAC.GTTT   | 15 | 48745815 | 48745828 | 3.5     | .                  | .        | intergenic | -0.392 | rs791023537   | 2 |
| AC.GT       | 15 | 48811828 | 48811837 | 5       | .                  | .        | intergenic | 0.214  | rs786722007   | 4 |
| AAC.GTT     | 15 | 48825234 | 48825247 | 4.66667 | .                  | .        | intergenic | 0.088  | 106781 rs7885 | 2 |
| AAAAA.GTTTT | 15 | 48844093 | 48844115 | 4.6     | .                  | .        | intergenic | 0.45   | rs790715284   | 2 |
| AT.AT       | 15 | 48888342 | 48888356 | 7.5     | .                  | .        | intergenic | -0.088 | .             | 2 |
| AC.GT       | 15 | 49180908 | 49180917 | 5       | .                  | .        | intergenic | 1.381  | rs788081611   | 2 |
| AG.CT       | 15 | 49305928 | 49305950 | 11.5    | .                  | .        | intergenic | 0.109  | .             | 2 |
| AAAG.CTTT   | 15 | 49342991 | 49343020 | 7.5     | .                  | .        | intergenic | 0.054  | 128109 rs7870 | 2 |
| AAG.CTT     | 15 | 49680737 | 49680751 | 5       | .                  | .        | intergenic | .      | 235071 rs7868 | 2 |
| AAAC.GTTT   | 15 | 49680817 | 49680839 | 5.75    | .                  | .        | intergenic | .      | rs791498794   | 2 |
| AG.CT       | 15 | 49749522 | 49749538 | 8.5     | .                  | .        | intergenic | -0.124 | rs790090455   | 4 |
| AT.AT       | 15 | 50167170 | 50167182 | 6.5     | .                  | .        | intergenic | -0.171 | rs790540384   | 2 |
| AAT.ATT     | 15 | 50254962 | 50254973 | 4       | .                  | .        | intergenic | -0.041 | rs786737288   | 2 |
| AAAC.GTTT   | 15 | 50277880 | 50277896 | 4.25    | .                  | .        | intergenic | -0.106 | 331453 rs7903 | 2 |
| AAAC.GTTT   | 15 | 50343903 | 50343923 | 5.25    | .                  | .        | intergenic | 0.295  | 158651 rs7899 | 2 |
| AT.AT       | 15 | 50513112 | 50513130 | 9.5     | .                  | .        | intergenic | 0.028  | 347295 rs7916 | 2 |
| AC.GT       | 15 | 50591680 | 50591705 | 13      | ENSSSCT00000017174 | .        | intron     | 0.321  | rs786777276   | 3 |
| AAAT.ATTT   | 15 | 50607098 | 50607118 | 5.25    | .                  | .        | intergenic | 0.198  | 774165 rs7878 | 2 |
| AC.GT       | 15 | 50660812 | 50660825 | 7       | .                  | .        | intergenic | 0.863  | rs791672542   | 2 |
| AAAAA.ATTTT | 15 | 50817775 | 50817801 | 5.4     | ENSSSCT00000032149 | .        | intron     | -0.004 | rs787383502   | 2 |
| AC.GT       | 15 | 50834695 | 50834705 | 5.5     | .                  | .        | intergenic | 0.066  | rs790371129   | 2 |
| ACAT.ATGT   | 15 | 50937601 | 50937619 | 4.75    | ENSSSCT00000022975 | TENM3    | intron     | 0.163  | 119700 rs7918 | 2 |
| ACAT.ATGT   | 15 | 50937601 | 50937619 | 4.75    | ENSSSCT00000017175 | TENM3    | intron     | 0.163  | 119700 rs7918 | 2 |
| ACAT.ATGT   | 15 | 50937601 | 50937619 | 4.75    | ENSSSCT00000026310 | TENM3    | intron     | 0.163  | 119700 rs7918 | 2 |
| AAG.CTT     | 15 | 51002259 | 51002278 | 6.66667 | .                  | .        | intergenic | .      | rs790360611   | 2 |
| AAAT.ATTT   | 15 | 51067510 | 51067528 | 4.75    | ENSSSCT00000017176 | DCTD     | intron     | -0.368 | .             | 2 |
| AG.CT       | 15 | 51124577 | 51124597 | 10.5    | .                  | .        | intergenic | .      | rs791287402   | 3 |
| AAT.ATT     | 15 | 51148290 | 51148312 | 7.66667 | .                  | .        | intergenic | 0.41   | rs787691304   | 2 |
| AAG.CTT     | 15 | 51247454 | 51247467 | 4.66667 | ENSSSCT00000028500 | WWC2     | intron     | .      | rs788874186   | 3 |
| AC.GT       | 15 | 51348773 | 51348785 | 6.5     | ENSSSCT00000028500 | WWC2     | intron     | 0.12   | rs790751410   | 3 |
| AT.AT       | 15 | 51398378 | 51398391 | 7       | ENSSSCT00000028500 | WWC2     | intron     | 0      | 251409 rs7937 | 2 |
| AAAC.GTTT   | 15 | 51525206 | 51525226 | 5.25    | .                  | .        | intergenic | 0.06   | rs787441060   | 2 |
| AAAC.GTTT   | 15 | 51534993 | 51535013 | 5.25    | ENSSSCT00000025252 | ING2     | intron     | 0.291  | rs792390087   | 2 |
| AC.GT       | 15 | 51571826 | 51571845 | 10      | .                  | .        | intergenic | 0.139  | rs790779597   | 2 |
| AAAT.ATTT   | 15 | 51621066 | 51621087 | 5.5     | ENSSSCT00000017178 | TRAPPC11 | intron     | 0.177  | rs792305290   | 2 |
| AAAAG.CTTTT | 15 | 51646222 | 51646244 | 4.6     | ENSSSCT00000017178 | TRAPPC11 | intron     | 0.021  | rs788521723   | 2 |
| AC.GT       | 15 | 51679030 | 51679042 | 6.5     | .                  | .        | intergenic | -0.093 | rs793710507   | 2 |
| AT.AT       | 15 | 51694104 | 51694113 | 5       | .                  | .        | intergenic | 0.309  | rs793064055   | 2 |
| AGC.GCT     | 15 | 51698489 | 51698501 | 4.33333 | .                  | .        | intergenic | -0.128 | rs790533610   | 2 |
| AAAAC.GTTTT | 15 | 51742848 | 51742871 | 4.8     | .                  | .        | intergenic | 0.071  | rs787186952   | 2 |
| AAC.GTT     | 15 | 51909005 | 51909026 | 7.33333 | ENSSSCT00000017181 | STOX2    | 3'utr      | 3.499  | 316552 rs7907 | 2 |
| AAAC.GTTT   | 15 | 51955584 | 51955598 | 3.75    | .                  | .        | intergenic | -0.148 | 123905 rs7917 | 2 |
| AC.GT       | 15 | 52210847 | 52210859 | 6.5     | ENSSSCT00000035483 | IRF2     | intron     | -0.184 | rs787649232   | 2 |
| AC.GT       | 15 | 52210847 | 52210859 | 6.5     | ENSSSCT00000032886 | IRF2     | intron     | -0.184 | rs787649232   | 2 |
| AC.GT       | 15 | 52210847 | 52210859 | 6.5     | ENSSSCT00000017183 | IRF2     | intron     | -0.184 | rs787649232   | 2 |
| AC.GT       | 15 | 52434242 | 52434253 | 6       | ENSSSCT00000017188 | .        | intron     | 0.204  | rs793451454   | 3 |
| AC.GT       | 15 | 52442644 | 52442654 | 5.5     | ENSSSCT00000017188 | .        | intron     | -0.263 | .             | 4 |
| AGC.GCT     | 15 | 52518116 | 52518131 | 5.33333 | ENSSSCT00000017189 | .        | intron     | -0.053 | .             | 3 |
| AAAAC.GTTTT | 15 | 53067502 | 53067522 | 4.2     | .                  | .        | intergenic | -0.131 | rs789298160   | 2 |
| AC.GT       | 15 | 53677209 | 53677219 | 5.5     | .                  | .        | intergenic | 0.009  | rs787757306   | 2 |
| AAAC.GTTT   | 15 | 53700541 | 53700561 | 5.25    | .                  | .        | intergenic | 0.065  | rs705411007   | 2 |
| AAAAC.GTTTT | 15 | 53767361 | 53767376 | 3.2     | ENSSSCT00000017210 | CYP4V2   | intron     | .      | rs787452369   | 2 |
| AAAT.ATTT   | 15 | 54136895 | 54136915 | 5.25    | .                  | .        | intergenic | .      | rs791955098   | 2 |
| AAAAG.CTTTT | 15 | 54412472 | 54412500 | 5.8     | ENSSSCT00000025294 | .        | intron     | .      | rs705867287   | 2 |
| AAAAG.CTTTT | 15 | 54412472 | 54412500 | 5.8     | ENSSSCT00000017214 | .        | intron     | .      | rs705867287   | 2 |
| AAAAG.CTTTT | 15 | 54412472 | 54412500 | 5.8     | ENSSSCT00000026211 | .        | intron     | .      | rs705867287   | 2 |
| AAAC.GTTT   | 15 | 54503105 | 54503123 | 4.75    | ENSSSCT00000017215 | ADAM32   | intron     | .      | rs790344781   | 2 |
| AAT.ATT     | 15 | 54513547 | 54513563 | 5.66667 | ENSSSCT00000017215 | ADAM32   | intron     | .      | .             | 2 |
| AT.AT       | 15 | 54956145 | 54956156 | 6       | .                  | .        | intergenic | -0.105 | rs789183319   | 4 |
| AAAG.CTTT   | 15 | 54992735 | 54992752 | 4.5     | .                  | .        | intergenic | 0.069  | rs789076421   | 2 |
| AAAAA.GTTTT | 15 | 55165684 | 55165713 | 5       | .                  | .        | intergenic | -0.116 | rs793825362   | 2 |
| AAC.GTT     | 15 | 55780792 | 55780808 | 5.66667 | .                  | .        | intergenic | 0.383  | .             | 4 |
| AACAC.GTGTT | 15 | 55833581 | 55833598 | 3.6     | .                  | .        | intergenic | -0.419 | rs790097439   | 2 |
| AC.GT       | 15 | 56162493 | 56162506 | 7       | .                  | .        | intergenic | 1.102  | .             | 4 |
| AAAT.ATTT   | 15 | 56349786 | 56349800 | 3.75    | .                  | .        | intergenic | 0.026  | 264956 rs7872 | 2 |
| AAAAC.GTTTT | 15 | 56563329 | 56563353 | 5       | .                  | .        | intergenic | 0.158  | .             | 3 |
| AAAC.GTTT   | 15 | 56564119 | 56564133 | 3.75    | .                  | .        | intergenic | 0.086  | 333640 rs7866 | 2 |
| AG.CT       | 15 | 56668824 | 56668840 | 8.5     | .                  | .        | intergenic | -0.057 | rs790479984   | 3 |
| AG.CT       | 15 | 56814293 | 56814311 | 9.5     | .                  | .        | intergenic | 0.1    | .             | 4 |
| AAAT.ATTT   | 15 | 56860666 | 56860689 | 6       | .                  | .        | intergenic | -0.085 | .             | 2 |

|              |    |          |          |         |                    |        |            |        |               |   |
|--------------|----|----------|----------|---------|--------------------|--------|------------|--------|---------------|---|
| AAC.GTT      | 15 | 56916180 | 56916192 | 4.33333 | .                  | .      | intergenic | -0.015 | rs791207099   | 4 |
| AAC.GTT      | 15 | 56998377 | 56998397 | 7       | .                  | .      | intergenic | -0.006 | rs793437287   | 2 |
| ACAT.ATGT    | 15 | 57492002 | 57492014 | 3.25    | ENSSSCT00000017238 | UNC5D  | intron     | -0.116 | .             | 2 |
| AAAC.GTTT    | 15 | 57639011 | 57639030 | 5       | .                  | .      | intergenic | -0.329 | 351688 rs7877 | 2 |
| AAAT.ATTT    | 15 | 57711042 | 57711061 | 5       | .                  | .      | intergenic | 0.41   | 117028 rs7924 | 2 |
| AGGG.CCCT    | 15 | 57926397 | 57926408 | 3       | .                  | .      | intergenic | -0.151 | rs786831642   | 2 |
| AAT.ATT      | 15 | 57977564 | 57977593 | 10      | .                  | .      | intergenic | 0.482  | rs788922088   | 2 |
| AAAC.GTTT    | 15 | 58123420 | 58123443 | 6       | .                  | .      | intergenic | -0.263 | rs787668439   | 2 |
| AAAC.GTTT    | 15 | 58186064 | 58186079 | 4       | .                  | .      | intergenic | -0.113 | rs793370232   | 2 |
| AG.CT        | 15 | 58468578 | 58468592 | 7.5     | .                  | .      | intergenic | -0.247 | rs792062571   | 3 |
| AAAAT.ATTTT  | 15 | 58939710 | 58939732 | 4.6     | .                  | .      | intergenic | 0.107  | rs792627637   | 2 |
| AG.CT        | 15 | 59242670 | 59242700 | 15.5    | .                  | .      | intergenic | -0.04  | .             | 2 |
| AAAT.ATTT    | 15 | 59458978 | 59458995 | 4.5     | .                  | .      | intergenic | .      | 304173 rs7886 | 2 |
| AAAT.ATTT    | 15 | 59473627 | 59473646 | 5       | .                  | .      | intergenic | 0.525  | rs791691049   | 2 |
| AAAAAT.ATTTT | 15 | 59502295 | 59502315 | 3.5     | ENSSSCT00000017242 | RNF122 | promoter   | .      | rs793886459   | 2 |
| AAAG.CTTT    | 15 | 59821978 | 59821992 | 3.75    | .                  | .      | intergenic | -0.09  | rs705862048   | 2 |
| AAAAC.GTTT   | 15 | 59877969 | 59877985 | 3.4     | .                  | .      | intergenic | 0.784  | 301294 rs7882 | 2 |
| AAAC.GTTT    | 15 | 59913688 | 59913714 | 6.75    | .                  | .      | intergenic | 0.003  | rs788502728   | 2 |
| AT.AT        | 15 | 60303081 | 60303090 | 5       | .                  | .      | intergenic | .      | rs788891968   | 2 |
| AAAAC.GTTT   | 15 | 60959984 | 60960000 | 3.4     | .                  | .      | intergenic | 0.132  | 302462 rs7888 | 2 |
| AC.GT        | 15 | 61308209 | 61308236 | 14      | .                  | .      | intergenic | 0.236  | 386778 rs7863 | 2 |
| AG.CT        | 15 | 61665171 | 61665182 | 6       | .                  | .      | intergenic | 0.14   | rs786963312   | 2 |
| AC.GT        | 15 | 61896076 | 61896087 | 6       | ENSSSCT00000017253 | GTF2E2 | intron     | 0.161  | 382065 rs7870 | 4 |
| AAAT.ATTT    | 15 | 62188799 | 62188814 | 4       | .                  | .      | intergenic | -0.295 | 318884 rs7888 | 2 |
| AT.AT        | 15 | 62255209 | 62255227 | 9.5     | ENSSSCT00000017255 | .      | intron     | .      | rs792580461   | 2 |
| AT.AT        | 15 | 62255209 | 62255227 | 9.5     | ENSSSCT00000020631 | 7SK    | promoter   | .      | rs792580461   | 2 |
| AAAAC.GTTT   | 15 | 62350130 | 62350155 | 5.2     | .                  | .      | intergenic | .      | 180875 rs7919 | 2 |
| AG.CT        | 15 | 62443862 | 62443878 | 8.5     | .                  | .      | intergenic | 0.902  | .             | 2 |
| AAAC.GTTT    | 15 | 62602793 | 62602815 | 5.75    | .                  | .      | intergenic | 0.362  | rs789197251   | 2 |
| AT.AT        | 15 | 62676209 | 62676222 | 7       | .                  | .      | intergenic | 0.027  | rs792910245   | 2 |
| AT.AT        | 15 | 62971065 | 62971078 | 7       | ENSSSCT00000017259 | TNKS   | intron     | 0.173  | 380939 rs7875 | 3 |
| AC.GT        | 15 | 63003143 | 63003153 | 5.5     | ENSSSCT00000017259 | TNKS   | intron     | 0.145  | .             | 2 |
| AAC.GTT      | 15 | 63066186 | 63066200 | 5       | ENSSSCT00000017259 | TNKS   | intron     | 0.271  | rs787680408   | 4 |
| AAC.GTT      | 15 | 63093482 | 63093495 | 4.66667 | ENSSSCT00000017259 | TNKS   | intron     | 0.148  | rs788724942   | 2 |
| AT.AT        | 15 | 63102747 | 63102761 | 7.5     | .                  | .      | intergenic | 0.007  | rs788787126   | 3 |
| AAAC.GTTT    | 15 | 63143378 | 63143410 | 8.25    | .                  | .      | intergenic | .      | .             | 2 |
| AAAT.ATTT    | 15 | 63298328 | 63298348 | 5.25    | .                  | .      | intergenic | -0.331 | rs789503551   | 2 |
| AC.GT        | 15 | 63673913 | 63673922 | 5       | .                  | .      | intergenic | .      | rs786292938   | 2 |
| AAAC.GTTT    | 15 | 63703707 | 63703725 | 4.75    | .                  | .      | intergenic | -0.061 | rs791778627   | 2 |
| AAC.GTT      | 15 | 63790396 | 63790408 | 4.33333 | ENSSSCT00000017261 | .      | intron     | 3.05   | rs788533780   | 2 |
| AGGG.CCCT    | 15 | 64030345 | 64030359 | 3.75    | ENSSSCT00000017263 | OCA2   | intron     | 0.089  | rs786898531   | 2 |
| AGGC.GCCT    | 15 | 64242795 | 64242809 | 3.75    | .                  | .      | intergenic | .      | .             | 4 |
| AAGT.ACTT    | 15 | 64287295 | 64287311 | 4.25    | .                  | .      | intergenic | .      | 363964 rs7879 | 2 |
| AAAAT.ATTTT  | 15 | 64340202 | 64340228 | 5.4     | .                  | .      | intergenic | -0.207 | 387618 rs7926 | 2 |
| AC.GT        | 15 | 64547828 | 64547854 | 13.5    | .                  | .      | intergenic | -0.073 | rs792864802   | 2 |
| AAAT.ATTT    | 15 | 64716143 | 64716160 | 4.5     | .                  | .      | intergenic | .      | rs790652479   | 3 |
| AAAC.GTTT    | 15 | 64861066 | 64861092 | 6.75    | .                  | .      | intergenic | 0.119  | rs789036949   | 3 |
| AAAAT.ATTTT  | 15 | 64884510 | 64884531 | 4.4     | .                  | .      | intergenic | 0.064  | rs793802639   | 2 |
| AAAAG.CTTT   | 15 | 65114028 | 65114051 | 4.8     | .                  | .      | intergenic | .      | rs788037107   | 2 |
| AAAT.ATTT    | 15 | 65313683 | 65313697 | 3.75    | .                  | .      | intergenic | .      | 128435 rs7882 | 2 |
| AC.GT        | 15 | 65472057 | 65472071 | 7.5     | .                  | .      | intergenic | .      | 306051 rs7920 | 2 |
| AAG.CTT      | 15 | 65700946 | 65700957 | 4       | .                  | .      | intergenic | .      | rs787772256   | 2 |
| AAGGG.CCCTT  | 15 | 65857161 | 65857184 | 4       | .                  | .      | intergenic | 0.04   | 368449 rs7924 | 2 |
| AATG.CATT    | 15 | 65984801 | 65984831 | 7.75    | .                  | .      | intergenic | .      | rs791615641   | 2 |
| AAAC.GTTT    | 15 | 66418170 | 66418194 | 6.25    | .                  | .      | intergenic | -0.2   | rs792190163   | 2 |
| AAAC.GTTT    | 15 | 66456762 | 66456778 | 4.25    | .                  | .      | intergenic | -0.401 | rs790952919   | 2 |
| AC.GT        | 15 | 66633760 | 66633783 | 12      | .                  | .      | intergenic | 0.393  | rs787836048   | 2 |
| AT.AT        | 15 | 66733922 | 66733936 | 7.5     | ENSSSCT00000017277 | FMNL2  | intron     | 0.063  | .             | 2 |
| AT.AT        | 15 | 66733922 | 66733936 | 7.5     | ENSSSCT00000028547 | FMNL2  | intron     | 0.063  | .             | 2 |
| AT.AT        | 15 | 66733922 | 66733936 | 7.5     | ENSSSCT00000023011 | FMNL2  | intron     | 0.063  | .             | 2 |
| AAAAG.CTTT   | 15 | 66832833 | 66832865 | 6.6     | ENSSSCT00000017277 | FMNL2  | intron     | -0.336 | rs792895920   | 2 |
| AAAAG.CTTT   | 15 | 66832833 | 66832865 | 6.6     | ENSSSCT00000028547 | FMNL2  | intron     | -0.336 | rs792895920   | 2 |
| AAAAG.CTTT   | 15 | 66832833 | 66832865 | 6.6     | ENSSSCT00000023011 | FMNL2  | intron     | -0.336 | rs792895920   | 2 |
| AG.CT        | 15 | 66874335 | 66874347 | 6.5     | ENSSSCT00000017277 | FMNL2  | intron     | 0.018  | .             | 3 |
| AG.CT        | 15 | 66874335 | 66874347 | 6.5     | ENSSSCT00000028547 | FMNL2  | intron     | 0.018  | .             | 3 |
| AG.CT        | 15 | 66874335 | 66874347 | 6.5     | ENSSSCT00000023011 | FMNL2  | intron     | 0.018  | .             | 3 |
| AAAC.GTTT    | 15 | 67542820 | 67542838 | 4.75    | .                  | .      | intergenic | 0.164  | rs789077666   | 2 |
| AAAC.GTTT    | 15 | 68091045 | 68091067 | 5.75    | .                  | .      | intergenic | .      | rs793405246   | 2 |
| AC.GT        | 15 | 68182658 | 68182683 | 13      | .                  | .      | intergenic | 0.048  | 365207 rs7873 | 2 |
| AC.GT        | 15 | 68598419 | 68598454 | 18      | .                  | .      | intergenic | -0.066 | rs792974938   | 3 |
| AAAT.ATTT    | 15 | 68881771 | 68881783 | 3.25    | ENSSSCT00000024665 | .      | intron     | -0.16  | 392336 rs7878 | 2 |
| AAAT.ATTT    | 15 | 69299908 | 69299940 | 8.25    | .                  | .      | intergenic | 0.165  | rs790492690   | 2 |
| AAAATC.GATTT | 15 | 69425439 | 69425466 | 4.66667 | ENSSSCT00000017281 | KCNJ3  | intron     | -0.052 | rs791624620   | 2 |
| AT.AT        | 15 | 69659850 | 69659861 | 6       | .                  | .      | intergenic | 0.029  | rs786500150   | 2 |
| AT.AT        | 15 | 69699838 | 69699847 | 5       | .                  | .      | intergenic | 0.039  | rs786429154   | 2 |
| AT.AT        | 15 | 69886069 | 69886079 | 5.5     | .                  | .      | intergenic | -0.003 | rs790211287   | 4 |
| AT.AT        | 15 | 70383655 | 70383664 | 5       | .                  | .      | intergenic | -0.011 | .             | 4 |
| AAAAG.CTTT   | 15 | 70618514 | 70618534 | 4.2     | .                  | .      | intergenic | 0.426  | rs789196978   | 2 |
| AAAT.ATTT    | 15 | 70955501 | 70955513 | 3.25    | .                  | .      | intergenic | 0.165  | rs787115166   | 2 |
| AAT.ATT      | 15 | 70993664 | 70993686 | 7.66667 | .                  | .      | intergenic | 0.179  | rs792545337   | 2 |
| AAC.GTT      | 15 | 71027604 | 71027621 | 6       | .                  | .      | intergenic | 0.251  | 107670 rs7901 | 2 |
| AT.AT        | 15 | 71292172 | 71292181 | 5       | ENSSSCT00000030069 | GALNT5 | intron     | -0.049 | rs791284862   | 4 |
| AC.GT        | 15 | 72235206 | 72235217 | 6       | .                  | .      | intergenic | 0.109  | rs787975119   | 2 |
| AG.CT        | 15 | 72379599 | 72379613 | 7.5     | .                  | .      | intergenic | 0.296  | .             | 4 |

|             |    |          |          |         |                    |          |            |        |               |   |
|-------------|----|----------|----------|---------|--------------------|----------|------------|--------|---------------|---|
| AAAC.GTTT   | 15 | 72458615 | 72458634 | 5       | ENSSSCT00000017287 | .        | intron     | 0.208  | .             | 3 |
| AAAC.GTTT   | 15 | 72603682 | 72603700 | 4.75    | .                  | .        | intergenic | 0.129  | 354692 rs7925 | 2 |
| AAAAT.ATTTT | 15 | 72746081 | 72746105 | 5       | ENSSSCT00000017290 | .        | intron     | .      | rs790942855   | 2 |
| AT.AT       | 15 | 72995134 | 72995149 | 8       | .                  | .        | intergenic | -0.505 | .             | 2 |
| AC.GT       | 15 | 73115258 | 73115285 | 14      | .                  | .        | intergenic | 0.062  | rs789963009   | 2 |
| AAAC.GTTT   | 15 | 73522615 | 73522642 | 7       | ENSSSCT00000017294 | BAZ2B    | intron     | 0.348  | rs792748417   | 2 |
| AAAC.GTTT   | 15 | 73522615 | 73522642 | 7       | ENSSSCT00000024565 | BAZ2B    | intron     | 0.348  | rs792748417   | 2 |
| AT.AT       | 15 | 73524535 | 73524544 | 5       | ENSSSCT00000017294 | BAZ2B    | intron     | 0.393  | rs788391162   | 2 |
| AT.AT       | 15 | 73524535 | 73524544 | 5       | ENSSSCT00000024565 | BAZ2B    | intron     | 0.393  | rs788391162   | 2 |
| AT.AT       | 15 | 73548841 | 73548853 | 6.5     | ENSSSCT00000017294 | BAZ2B    | intron     | 0.154  | rs789836453   | 3 |
| AT.AT       | 15 | 73548841 | 73548853 | 6.5     | ENSSSCT00000024565 | BAZ2B    | intron     | 0.154  | rs789836453   | 3 |
| AT.AT       | 15 | 73793986 | 73793998 | 6.5     | .                  | .        | intergenic | .      | 150977 rs7862 | 2 |
| AAAC.GTTT   | 15 | 73842117 | 73842145 | 7.25    | .                  | .        | intergenic | .      | .             | 2 |
| AAAC.GTTT   | 15 | 73933343 | 73933364 | 5.5     | ENSSSCT00000031773 | 7-Mar    | intron     | 1.29   | 397980 rs7904 | 2 |
| AAAC.GTTT   | 15 | 73933343 | 73933364 | 5.5     | ENSSSCT00000017295 | 7-Mar    | intron     | 1.29   | 397980 rs7904 | 2 |
| AAAC.GTTT   | 15 | 73977874 | 73977890 | 4.25    | ENSSSCT00000032142 | LY75     | intron     | 0.283  | rs787108027   | 2 |
| AAAC.GTTT   | 15 | 73977874 | 73977890 | 4.25    | ENSSSCT00000034209 | LY75     | intron     | 0.283  | rs787108027   | 2 |
| AAC.GTT     | 15 | 73996718 | 73996736 | 6.33333 | ENSSSCT00000032142 | LY75     | intron     | 0.374  | rs789953761   | 2 |
| AAC.GTT     | 15 | 73996718 | 73996736 | 6.33333 | ENSSSCT00000035518 | LY75     | intron     | 0.374  | rs789953761   | 2 |
| AT.AT       | 15 | 74187338 | 74187355 | 9       | ENSSSCT00000017297 | PLA2R1   | intron     | 0.202  | .             | 3 |
| AT.AT       | 15 | 74187338 | 74187355 | 9       | ENSSSCT00000017298 | .        | intron     | 0.202  | .             | 3 |
| AG.CT       | 15 | 74187754 | 74187770 | 8.5     | ENSSSCT00000017297 | PLA2R1   | intron     | 1.185  | .             | 3 |
| AG.CT       | 15 | 74187754 | 74187770 | 8.5     | ENSSSCT00000017298 | .        | intron     | 1.185  | .             | 3 |
| AAAAG.CTTTT | 15 | 74225024 | 74225043 | 4       | ENSSSCT00000017297 | PLA2R1   | intron     | .      | rs791069609   | 2 |
| AAAAG.CTTTT | 15 | 74225024 | 74225043 | 4       | ENSSSCT00000017298 | .        | intron     | .      | rs791069609   | 2 |
| AAAC.GTTT   | 15 | 74362371 | 74362389 | 4.75    | .                  | .        | intergenic | 0.212  | rs790596380   | 2 |
| AC.GT       | 15 | 74402823 | 74402835 | 6.5     | .                  | .        | intergenic | 0.232  | .             | 2 |
| ATCC.GGAT   | 15 | 74483032 | 74483059 | 7       | ENSSSCT00000017300 | RBMS1    | intron     | 0.186  | rs791872527   | 2 |
| AAC.GTT     | 15 | 74601236 | 74601258 | 7.66667 | .                  | .        | intergenic | 0.24   | 719290 rs7910 | 2 |
| AC.GT       | 15 | 74797072 | 74797081 | 5       | .                  | .        | intergenic | -0.017 | rs790815387   | 2 |
| AAAC.GTTT   | 15 | 75142603 | 75142634 | 8       | .                  | .        | intergenic | 0.056  | rs789670136   | 2 |
| AT.AT       | 15 | 75205413 | 75205425 | 6.5     | .                  | .        | intergenic | 0.395  | .             | 2 |
| AC.GT       | 15 | 75325781 | 75325807 | 13.5    | .                  | .        | intergenic | 1.392  | rs793032950   | 3 |
| AT.AT       | 15 | 75544741 | 75544756 | 8       | .                  | .        | intergenic | 0.292  | rs788671663   | 2 |
| AAC.GTT     | 15 | 75632980 | 75632991 | 4       | .                  | .        | intergenic | 0.592  | rs788692030   | 2 |
| AC.GT       | 15 | 75879495 | 75879508 | 7       | .                  | .        | intergenic | 0.297  | rs789048407   | 2 |
| AAAG.CTTT   | 15 | 76094741 | 76094778 | 9.5     | ENSSSCT00000027600 | SLC4A10  | intron     | 0.196  | .             | 2 |
| AAAG.CTTT   | 15 | 76094741 | 76094778 | 9.5     | ENSSSCT00000023989 | SLC4A10  | intron     | 0.196  | .             | 2 |
| AAAG.CTTT   | 15 | 76094741 | 76094778 | 9.5     | ENSSSCT00000017305 | SLC4A10  | intron     | 0.196  | .             | 2 |
| AAAC.GTTT   | 15 | 76243187 | 76243209 | 5.75    | .                  | .        | intergenic | 0.262  | 199002 rs7899 | 2 |
| AAAT.ATTT   | 15 | 76370770 | 76370792 | 5.75    | ENSSSCT00000017308 | FAP      | intron     | 1.153  | 369708 rs7888 | 2 |
| AAAT.ATTT   | 15 | 76370770 | 76370792 | 5.75    | ENSSSCT00000036390 | FAP      | intron     | 1.153  | 369708 rs7888 | 2 |
| AT.AT       | 15 | 76401215 | 76401225 | 5.5     | .                  | .        | intergenic | 0.122  | rs791991103   | 2 |
| AC.GT       | 15 | 76455829 | 76455845 | 8.5     | ENSSSCT00000017310 | IFIH1    | intron     | 1.335  | .             | 2 |
| AAAT.ATTT   | 15 | 76906922 | 76906933 | 3       | .                  | .        | intergenic | 0.088  | rs787774824   | 2 |
| AAAT.ATTT   | 15 | 76917099 | 76917112 | 3.5     | .                  | .        | intergenic | 0.085  | rs788118856   | 2 |
| AC.GT       | 15 | 77035172 | 77035199 | 14      | .                  | .        | intergenic | -0.075 | rs788829849   | 3 |
| AGAT.ATCT   | 15 | 77061375 | 77061400 | 6.5     | .                  | .        | intergenic | -0.121 | 180987 rs7883 | 2 |
| AT.AT       | 15 | 77137064 | 77137077 | 7       | .                  | .        | intergenic | 0.078  | rs790479520   | 4 |
| AAAG.CTTT   | 15 | 77696008 | 77696029 | 5.5     | .                  | .        | intergenic | 0.123  | rs787452153   | 2 |
| AT.AT       | 15 | 77861867 | 77861877 | 5.5     | .                  | .        | intergenic | 0.619  | .             | 4 |
| AC.GT       | 15 | 78005735 | 78005758 | 12      | .                  | .        | intergenic | 0.759  | .             | 2 |
| AAAAC.GTTTT | 15 | 78245393 | 78245411 | 3.16667 | .                  | .        | intergenic | 3.479  | 265482 rs7927 | 2 |
| AC.GT       | 15 | 78269224 | 78269234 | 5.5     | .                  | .        | intergenic | 0.127  | .             | 2 |
| AG.CT       | 15 | 78288429 | 78288438 | 5       | .                  | .        | intergenic | .      | .             | 2 |
| AAAT.ATTT   | 15 | 78293773 | 78293798 | 6.5     | .                  | .        | intergenic | 0.21   | rs789811758   | 2 |
| AT.AT       | 15 | 78488708 | 78488730 | 11.5    | .                  | .        | intergenic | -0.051 | rs786710084   | 2 |
| AAAC.GTTT   | 15 | 79963856 | 79963892 | 9.25    | ENSSSCT00000029568 | SLC38A11 | intron     | .      | 132216 rs7872 | 2 |
| AAAG.CTTT   | 15 | 80265602 | 80265632 | 7.75    | .                  | .        | intergenic | 0.006  | rs789941774   | 2 |
| AG.CT       | 15 | 80407277 | 80407286 | 5       | ENSSSCT00000017318 | SCN2A    | intron     | -0.15  | rs792919306   | 2 |
| AAAT.ATTT   | 15 | 80519837 | 80519859 | 5.75    | .                  | .        | intergenic | -0.047 | rs789385303   | 3 |
| AATG.CATT   | 15 | 80753242 | 80753270 | 7.25    | .                  | .        | intergenic | 0.09   | rs793039656   | 2 |
| AT.AT       | 15 | 80882873 | 80882883 | 5.5     | .                  | .        | intergenic | 1.661  | 302423 rs7912 | 2 |
| AC.GT       | 15 | 81231015 | 81231028 | 7       | .                  | .        | intergenic | .      | rs788150270   | 3 |
| AAAT.ATTT   | 15 | 82314956 | 82314975 | 5       | .                  | .        | intergenic | .      | rs787912263   | 2 |
| AC.GT       | 15 | 82441259 | 82441271 | 6.5     | .                  | .        | intergenic | -0.096 | rs793867984   | 2 |
| AAAC.GTTT   | 15 | 82470634 | 82470654 | 5.25    | .                  | .        | intergenic | .      | rs786743650   | 2 |
| AAAT.ATTT   | 15 | 82806875 | 82806892 | 4.5     | .                  | .        | intergenic | 0.022  | rs787295052   | 2 |
| ACAT.ATGT   | 15 | 82879341 | 82879378 | 9.5     | .                  | .        | intergenic | 0.167  | rs786975114   | 2 |
| AT.AT       | 15 | 82934548 | 82934559 | 6       | .                  | .        | intergenic | 0.129  | rs791708809   | 3 |
| AT.AT       | 15 | 83044400 | 83044411 | 6       | .                  | .        | intergenic | .      | rs788922979   | 2 |
| AAAAC.GTTTT | 15 | 83258950 | 83258972 | 4.6     | .                  | .        | intergenic | 0.181  | rs786816449   | 2 |
| AAAC.GTTT   | 15 | 83380323 | 83380336 | 3.5     | .                  | .        | intergenic | .      | rs694912653   | 2 |
| AATC.GATT   | 15 | 83431914 | 83431938 | 6.25    | ENSSSCT00000030087 | .        | intron     | -0.241 | 396061 rs7902 | 2 |
| AAAC.GTTT   | 15 | 83477699 | 83477722 | 6       | ENSSSCT00000030087 | .        | intron     | -0.092 | 356906 rs7883 | 2 |
| AC.GT       | 15 | 83598049 | 83598059 | 5.5     | .                  | .        | intergenic | -0.107 | .             | 3 |
| ATCC.GGAT   | 15 | 84488147 | 84488170 | 6       | ENSSSCT00000017341 | G6PC2    | intron     | 0.139  | rs793016709   | 2 |
| AAAT.ATTT   | 15 | 84551181 | 84551205 | 6.25    | ENSSSCT00000017343 | ABCB11   | intron     | 0.232  | rs789979812   | 2 |
| AAAT.ATTT   | 15 | 84551181 | 84551205 | 6.25    | ENSSSCT00000017342 | ABCB11   | intron     | 0.232  | rs789979812   | 2 |
| AC.GT       | 15 | 84900144 | 84900167 | 12      | .                  | .        | intergenic | .      | .             | 2 |
| AC.GT       | 15 | 85017895 | 85017914 | 10      | ENSSSCT00000025574 | FASTKD1  | intron     | 0.936  | .             | 2 |
| AC.GT       | 15 | 85017895 | 85017914 | 10      | ENSSSCT00000017349 | FASTKD1  | intron     | 0.936  | .             | 2 |
| AAAC.GTTT   | 15 | 85076661 | 85076683 | 5.75    | ENSSSCT00000017350 | PPIG     | intron     | 0.102  | 112844 rs7873 | 2 |
| AAAAC.GTTTT | 15 | 85178218 | 85178245 | 4.66667 | .                  | .        | intergenic | .      | rs791770524   | 2 |

|              |    |          |          |         |                    |          |            |        |        |             |        |   |
|--------------|----|----------|----------|---------|--------------------|----------|------------|--------|--------|-------------|--------|---|
| AT.AT        | 15 | 85479990 | 85479999 | 5       | ENSSSCT00000017356 | .        | intron     | 0.187  | 254225 | rs7910      | 2      |   |
| AAAC.GTTT    | 15 | 85498638 | 85498656 | 4.75    | ENSSSCT00000017356 | .        | intron     | 0.32   | .      | rs786362079 | 2      |   |
| AAC.GTT      | 15 | 85542144 | 85542155 | 4       | .                  | .        | intergenic | 0.271  | .      | rs788611896 | 2      |   |
| AC.GT        | 15 | 85639400 | 85639425 | 13      | .                  | .        | intergenic | 0.206  | 140915 | rs7930      | 4      |   |
| AAAAAC.GTTTT | 15 | 85793873 | 85793900 | 4.66667 | .                  | .        | intergenic | .      | .      | rs790913809 | 2      |   |
| AATAT.ATATT  | 15 | 86281241 | 86281255 | 3       | .                  | .        | intergenic | 0.198  | .      | rs792401315 | 2      |   |
| AT.AT        | 15 | 86429901 | 86429912 | 6       | .                  | .        | intergenic | .      | .      | rs788273603 | 2      |   |
| AAAAG.CTTTT  | 15 | 86460496 | 86460517 | 4.4     | .                  | .        | intergenic | 0.225  | 128503 | rs7874      | 2      |   |
| AAG.CTT      | 15 | 86509591 | 86509604 | 4.66667 | ENSSSCT00000017360 | GORASP2  | intron     | -0.17  | .      | rs789299780 | 2      |   |
| AAC.GTT      | 15 | 86525961 | 86525974 | 4.66667 | .                  | .        | intergenic | .      | .      | rs788656375 | 2      |   |
| AAACC.GGTTT  | 15 | 86574335 | 86574360 | 4.33333 | ENSSSCT00000017361 | TLK1     | intron     | 0.263  | .      | rs788828621 | 2      |   |
| AG.CT        | 15 | 86886498 | 86886508 | 5.5     | ENSSSCT00000017362 | METTL8   | intron     | 0.308  | .      | .           | 4      |   |
| AAAC.GTTT    | 15 | 86952512 | 86952530 | 4.75    | ENSSSCT00000023821 | DCAF17   | intron     | .      | .      | rs792236291 | 2      |   |
| AAAC.GTTT    | 15 | 86952512 | 86952530 | 4.75    | ENSSSCT00000017364 | DCAF17   | intron     | .      | .      | rs792236291 | 2      |   |
| AAC.GTT      | 15 | 87146459 | 87146475 | 5.66667 | .                  | .        | intergenic | 0.111  | .      | rs789802622 | 2      |   |
| AAAAAC.GTTTT | 15 | 87164452 | 87164473 | 3.66667 | .                  | .        | intergenic | 0.194  | .      | rs786450414 | 2      |   |
| AT.AT        | 15 | 87368958 | 87368971 | 7       | ENSSSCT00000017366 | SLC25A12 | intron     | 0.315  | .      | rs790816980 | 2      |   |
| AT.AT        | 15 | 87368958 | 87368971 | 7       | ENSSSCT00000022813 | SLC25A12 | intron     | 0.315  | .      | rs790816980 | 2      |   |
| AG.CT        | 15 | 87649329 | 87649340 | 6       | ENSSSCT00000017371 | DLX2     | promoter   | 0.172  | .      | rs793282223 | 2      |   |
| AC.GT        | 15 | 87757170 | 87757181 | 6       | .                  | .        | intergenic | .      | .      | .           | 4      |   |
| AAAAG.CTTTT  | 15 | 87966213 | 87966239 | 5.4     | .                  | .        | intergenic | .      | .      | rs787853369 | 2      |   |
| AC.GT        | 15 | 88130192 | 88130208 | 8.5     | ENSSSCT00000031710 | .        | intron     | -0.125 | 163962 | rs7863      | 2      |   |
| AT.AT        | 15 | 88132156 | 88132166 | 5.5     | ENSSSCT00000031710 | .        | intron     | 0.048  | .      | rs787175452 | 2      |   |
| AAAC.GTTT    | 15 | 88169846 | 88169865 | 5       | ENSSSCT00000031710 | .        | intron     | 0.746  | 797653 | rs7872      | 2      |   |
| AC.GT        | 15 | 88250310 | 88250342 | 16.5    | ENSSSCT00000031710 | .        | intron     | 0.186  | 109157 | rs7932      | 2      |   |
| AAAAAC.GTTTT | 15 | 88287592 | 88287605 | 2.8     | .                  | .        | intergenic | 0.048  | .      | rs788787474 | 2      |   |
| AT.AT        | 15 | 88307752 | 88307762 | 5.5     | .                  | .        | intergenic | .      | .      | 10310       | rs7921 | 2 |
| AAAC.GTTT    | 15 | 88472783 | 88472812 | 7.5     | .                  | .        | intergenic | .      | .      | 172374      | rs7905 | 3 |
| AAAAAC.GTTTT | 15 | 88518928 | 88518963 | 7.2     | ENSSSCT00000017378 | .        | intron     | 0.437  | .      | 198064      | rs7926 | 2 |
| AAAT.ATTT    | 15 | 88537271 | 88537289 | 4.75    | ENSSSCT00000017378 | .        | intron     | .      | .      | rs787668762 | 2      |   |
| AAAT.ATTT    | 15 | 88554502 | 88554515 | 3.5     | ENSSSCT00000017378 | .        | intron     | .      | .      | rs792615612 | 2      |   |
| AAAC.GTTT    | 15 | 88573908 | 88573929 | 5.5     | ENSSSCT00000017378 | .        | intron     | 0.158  | .      | rs788506805 | 2      |   |
| AAG.CTT      | 15 | 88602245 | 88602269 | 8.33333 | ENSSSCT00000017378 | .        | intron     | 0.483  | .      | .           | 2      |   |
| AAAT.ATTT    | 15 | 88620245 | 88620261 | 4.25    | ENSSSCT00000017378 | .        | intron     | 0.269  | .      | rs788964221 | 2      |   |
| AT.AT        | 15 | 88786357 | 88786367 | 5.5     | .                  | .        | intergenic | 0.175  | .      | rs792295205 | 2      |   |
| AC.GT        | 15 | 89301581 | 89301593 | 6.5     | .                  | .        | intergenic | 0.273  | .      | .           | 4      |   |
| AAAC.GTTT    | 15 | 89415419 | 89415455 | 9.25    | ENSSSCT00000017382 | OLA1     | intron     | 0.25   | .      | rs790473872 | 2      |   |
| AT.AT        | 15 | 89739679 | 89739689 | 5.5     | .                  | .        | intergenic | 0.568  | .      | rs790630708 | 2      |   |
| AAACC.GGTTT  | 15 | 89826586 | 89826611 | 5.2     | ENSSSCT00000028507 | WIPF1    | intron     | .      | .      | rs789351396 | 2      |   |
| AC.GT        | 15 | 89887324 | 89887338 | 7.5     | .                  | .        | intergenic | .      | .      | rs792710524 | 2      |   |
| AAAC.GTTT    | 15 | 89909911 | 89909931 | 5.25    | .                  | .        | intergenic | 0.278  | .      | rs791898113 | 2      |   |
| ATC.GAT      | 15 | 89983432 | 89983451 | 6.66667 | .                  | .        | intergenic | 0.182  | .      | .           | 2      |   |
| AT.AT        | 15 | 90130124 | 90130134 | 5.5     | .                  | .        | intergenic | .      | .      | 136367      | rs7935 | 2 |
| AC.GT        | 15 | 90133087 | 90133099 | 6.5     | .                  | .        | intergenic | -0.01  | .      | 101178      | rs7893 | 3 |
| AAAT.ATTT    | 15 | 90289749 | 90289767 | 4.75    | ENSSSCT00000017391 | ATF2     | intron     | 0.251  | .      | rs788298288 | 2      |   |
| AC.GT        | 15 | 90323927 | 90323941 | 7.5     | .                  | .        | intergenic | 0.132  | .      | 105688      | rs7919 | 3 |
| AT.AT        | 15 | 90354287 | 90354299 | 6.5     | .                  | .        | intergenic | .      | .      | 180305      | rs7870 | 2 |
| AT.AT        | 15 | 90457134 | 90457145 | 6       | .                  | .        | intergenic | 0.061  | .      | rs699786243 | 3      |   |
| AAAAAC.GTTTT | 15 | 90745129 | 90745147 | 3.8     | .                  | .        | intergenic | -0.089 | .      | 142070      | rs7931 | 2 |
| AGC.GCT      | 15 | 90807655 | 90807674 | 6.66667 | .                  | .        | intergenic | 0.024  | .      | rs788109430 | 2      |   |
| AGG.CCT      | 15 | 91471810 | 91471829 | 6.66667 | .                  | .        | intergenic | .      | .      | 1391260     | rs7878 | 2 |
| AAAAAC.GTTTT | 15 | 91483636 | 91483662 | 5.4     | .                  | .        | intergenic | 0.742  | .      | 186290      | rs7929 | 2 |
| AAAC.GTTT    | 15 | 91520321 | 91520337 | 4.25    | .                  | .        | intergenic | -0.032 | .      | rs789840246 | 2      |   |
| ACAG.CTGT    | 15 | 91639167 | 91639189 | 5.75    | .                  | .        | intergenic | 0.262  | .      | 100036      | rs7024 | 4 |
| AAAC.GTTT    | 15 | 91750972 | 91750990 | 4.75    | .                  | .        | intergenic | -0.041 | .      | 1346716     | rs7864 | 2 |
| AC.GT        | 15 | 91963515 | 91963525 | 5.5     | .                  | .        | intergenic | 0.025  | .      | .           | 3      |   |
| AG.CT        | 15 | 92019559 | 92019569 | 5.5     | .                  | .        | intergenic | 0.229  | .      | .           | 2      |   |
| AATC.GATT    | 15 | 92072097 | 92072110 | 3.5     | .                  | .        | intergenic | 0.271  | .      | rs792746758 | 2      |   |
| AAC.GTT      | 15 | 92190366 | 92190384 | 6.33333 | .                  | .        | intergenic | 0.284  | .      | rs789882563 | 2      |   |
| ATC.GAT      | 15 | 92225740 | 92225753 | 4.66667 | .                  | .        | intergenic | 0.239  | .      | rs789738242 | 2      |   |
| AC.GT        | 15 | 92274846 | 92274860 | 7.5     | .                  | .        | intergenic | 0.204  | .      | rs791845995 | 3      |   |
| AAAG.CTTT    | 15 | 92344650 | 92344668 | 4.75    | .                  | .        | intergenic | .      | .      | rs786562538 | 2      |   |
| AG.CT        | 15 | 92901608 | 92901623 | 8       | ENSSSCT00000017415 | PDE11A   | intron     | 0.236  | .      | rs788903860 | 2      |   |
| AAC.GTT      | 15 | 93329415 | 93329434 | 6.66667 | ENSSSCT00000017417 | RBM45    | promoter   | 0.079  | .      | 117624      | rs6904 | 2 |
| AAAC.GTTT    | 15 | 93498834 | 93498863 | 7.5     | .                  | .        | intergenic | 0.202  | .      | rs787774825 | 2      |   |
| AAAT.ATTT    | 15 | 93571469 | 93571485 | 4.25    | ENSSSCT00000027373 | OSBPL6   | intron     | 0.167  | .      | 1397760     | rs7892 | 2 |
| AT.AT        | 15 | 93592633 | 93592656 | 12      | ENSSSCT00000027373 | OSBPL6   | intron     | 0.237  | .      | 1358505     | rs7886 | 4 |
| AC.GT        | 15 | 93649081 | 93649092 | 6       | .                  | .        | intergenic | .      | .      | rs786400176 | 2      |   |
| AATG.CATT    | 15 | 93678184 | 93678210 | 6.75    | ENSSSCT00000017418 | PRKRA    | intron     | 0.011  | .      | 1347120     | rs7919 | 2 |
| AC.GT        | 15 | 93747239 | 93747254 | 8       | .                  | .        | intergenic | 0.202  | .      | .           | 2      |   |
| AAAC.GTTT    | 15 | 94160431 | 94160445 | 3.75    | ENSSSCT00000017424 | CCDC141  | intron     | 0.547  | .      | rs790311326 | 2      |   |
| AT.AT        | 15 | 94240907 | 94240917 | 5.5     | .                  | .        | intergenic | .      | .      | .           | 3      |   |
| AGC.GCT      | 15 | 94718562 | 94718579 | 6       | .                  | .        | intergenic | 0      | .      | 144752      | rs7873 | 2 |
| ACCT.AGGT    | 15 | 95047512 | 95047540 | 7.25    | .                  | .        | intergenic | 0.059  | .      | .           | 2      |   |
| AG.CT        | 15 | 95246966 | 95246989 | 12      | .                  | .        | intergenic | 0.103  | .      | rs791689812 | 2      |   |
| AC.GT        | 15 | 96072767 | 96072785 | 9.5     | .                  | .        | intergenic | -0.014 | .      | rs787447913 | 4      |   |
| AT.AT        | 15 | 96479947 | 96479959 | 6.5     | .                  | .        | intergenic | -0.124 | .      | rs786700754 | 2      |   |
| AAAT.ATTT    | 15 | 96505476 | 96505494 | 4.75    | .                  | .        | intergenic | 0.056  | .      | 1331364     | rs7925 | 2 |
| ACCC.GGGT    | 15 | 96818994 | 96819008 | 3.75    | .                  | .        | intergenic | -0.049 | .      | .           | 2      |   |
| AAAAAG.CTTTT | 15 | 96996469 | 96996488 | 3.33333 | .                  | .        | intergenic | -0.05  | .      | 1344344     | rs7870 | 2 |
| AC.GT        | 15 | 97018570 | 97018595 | 13      | ENSSSCT00000024180 | PDE1A    | intron     | 0.087  | .      | .           | 4      |   |
| AAAT.ATTT    | 15 | 97021034 | 97021056 | 5.75    | ENSSSCT00000024180 | PDE1A    | intron     | 3.665  | .      | rs786510926 | 2      |   |
| AAAC.GTTT    | 15 | 97227849 | 97227865 | 4.25    | ENSSSCT00000027867 | .        | intron     | 0.085  | .      | rs792953840 | 2      |   |
| AATT.AATT    | 15 | 97392411 | 97392428 | 4.5     | ENSSSCT00000027867 | .        | intron     | 0.085  | .      | rs792139599 | 2      |   |

|             |    |           |           |         |                    |         |            |        |             |        |   |
|-------------|----|-----------|-----------|---------|--------------------|---------|------------|--------|-------------|--------|---|
| AAATT.AATTT | 15 | 97625750  | 97625789  | 8       | .                  | .       | intergenic | 0.211  | rs38616     | rs7933 | 2 |
| AC.GT       | 15 | 97644691  | 97644702  | 6       | .                  | .       | intergenic | 0.164  | rs790048    | rs7890 | 2 |
| AAAC.GTTT   | 15 | 97752884  | 97752908  | 6.25    | ENSSSCT00000017440 | DNAJC10 | intron     | .      | rs354464    | rs7889 | 2 |
| AAATT.AATTT | 15 | 98100666  | 98100690  | 5       | .                  | .       | intergenic | 0.166  | rs790152023 | .      | 2 |
| AG.CT       | 15 | 98317207  | 98317217  | 5.5     | .                  | .       | intergenic | 0.027  | .           | .      | 2 |
| AAAC.GTTT   | 15 | 98380363  | 98380375  | 3.25    | .                  | .       | intergenic | 0.123  | rs792282585 | .      | 2 |
| AAC.GTT     | 15 | 98398388  | 98398424  | 12.3333 | .                  | .       | intergenic | .      | rs788991667 | .      | 2 |
| AAAC.GTTT   | 15 | 98844025  | 98844048  | 6       | .                  | .       | intergenic | -0.276 | rs363203    | rs7910 | 2 |
| AATT.AATT   | 15 | 98975325  | 98975338  | 3.5     | .                  | .       | intergenic | 0.256  | rs788493740 | .      | 2 |
| AC.GT       | 15 | 99097914  | 99097928  | 7.5     | .                  | .       | intergenic | .      | .           | .      | 2 |
| AC.GT       | 15 | 99298976  | 99298986  | 5.5     | .                  | .       | intergenic | 0.043  | rs791669658 | .      | 2 |
| AC.GT       | 15 | 99318946  | 99318957  | 6       | .                  | .       | intergenic | 0.305  | .           | .      | 3 |
| AAAAC.GTTTT | 15 | 99389339  | 99389366  | 5.6     | .                  | .       | intergenic | .      | rs739777    | rs7933 | 2 |
| AAAAT.ATTTT | 15 | 99457605  | 99457626  | 4.4     | .                  | .       | intergenic | -0.027 | rs789217690 | .      | 2 |
| AAAC.GTTT   | 15 | 99536491  | 99536517  | 6.75    | .                  | .       | intergenic | 0.049  | rs789629    | rs7921 | 2 |
| AC.GT       | 15 | 99571919  | 99571929  | 5.5     | .                  | .       | intergenic | .      | .           | .      | 2 |
| AATT.AATT   | 15 | 99651675  | 99651688  | 3.5     | .                  | .       | intergenic | .      | rs792122114 | .      | 2 |
| AC.GT       | 15 | 99657956  | 99657965  | 5       | .                  | .       | intergenic | .      | .           | .      | 2 |
| AAAG.CTTT   | 15 | 99723069  | 99723100  | 8       | .                  | .       | intergenic | .      | rs787607789 | .      | 2 |
| AAAC.GTTT   | 15 | 99731525  | 99731547  | 5.75    | .                  | .       | intergenic | -0.177 | rs39214     | rs7908 | 2 |
| AT.AT       | 15 | 99954837  | 99954846  | 5       | .                  | .       | intergenic | .      | rs787718106 | .      | 2 |
| AC.GT       | 15 | 100369487 | 100369505 | 9.5     | .                  | .       | intergenic | -0.011 | rs34073     | rs7912 | 2 |
| AAT.ATT     | 15 | 100570626 | 100570640 | 5       | .                  | .       | intergenic | 0.083  | .           | .      | 4 |
| AT.AT       | 15 | 100574895 | 100574927 | 16.5    | .                  | .       | intergenic | -0.018 | .           | .      | 2 |
| AC.GT       | 15 | 100596749 | 100596758 | 5       | .                  | .       | intergenic | 0.046  | rs792597673 | .      | 2 |
| AC.GT       | 15 | 100610758 | 100610768 | 5.5     | .                  | .       | intergenic | .      | .           | .      | 3 |
| AC.GT       | 15 | 101143298 | 101143318 | 10.5    | .                  | .       | intergenic | 0.366  | rs38979     | rs7895 | 2 |
| AAAAT.ATTTT | 15 | 101151340 | 101151362 | 4.6     | .                  | .       | intergenic | .      | rs314443    | rs7938 | 2 |
| AAAC.GTTT   | 15 | 101276771 | 101276785 | 3.75    | .                  | .       | intergenic | 0.144  | rs116265    | rs7923 | 2 |
| AAC.GTT     | 15 | 101325135 | 101325152 | 6       | .                  | .       | intergenic | .      | rs787015818 | .      | 3 |
| AG.CT       | 15 | 101494381 | 101494392 | 6       | .                  | .       | intergenic | 0.168  | rs789006702 | .      | 3 |
| AG.CT       | 15 | 101538766 | 101538776 | 5.5     | .                  | .       | intergenic | 0.282  | .           | .      | 3 |
| AAAT.ATTT   | 15 | 101622450 | 101622479 | 7.5     | ENSSSCT00000017452 | ITGAV   | intron     | 0.426  | rs786596228 | .      | 2 |
| AAAG.CTTT   | 15 | 101684900 | 101684916 | 4.25    | ENSSSCT00000017452 | ITGAV   | intron     | 1.055  | rs788391626 | .      | 2 |
| AAAG.CTTT   | 15 | 101684900 | 101684916 | 4.25    | ENSSSCT00000035294 | ITGAV   | intron     | 1.055  | rs788391626 | .      | 2 |
| AAAG.CTTT   | 15 | 101684900 | 101684916 | 4.25    | ENSSSCT00000035682 | ITGAV   | intron     | 1.055  | rs788391626 | .      | 2 |
| AAAG.CTTT   | 15 | 101684900 | 101684916 | 4.25    | ENSSSCT00000034634 | ITGAV   | intron     | 1.055  | rs788391626 | .      | 2 |
| AAC.GTT     | 15 | 101712167 | 101712186 | 6.66667 | ENSSSCT00000017452 | ITGAV   | intron     | 0.018  | rs517364    | rs7890 | 2 |
| AAC.GTT     | 15 | 101712167 | 101712186 | 6.66667 | ENSSSCT00000035294 | ITGAV   | intron     | 0.018  | rs517364    | rs7890 | 2 |
| AAC.GTT     | 15 | 101712167 | 101712186 | 6.66667 | ENSSSCT00000035682 | ITGAV   | intron     | 0.018  | rs517364    | rs7890 | 2 |
| AAC.GTT     | 15 | 101712167 | 101712186 | 6.66667 | ENSSSCT00000034634 | ITGAV   | intron     | 0.018  | rs517364    | rs7890 | 2 |
| AC.GT       | 15 | 101721653 | 101721666 | 7       | .                  | .       | intergenic | 0.062  | rs792945825 | .      | 4 |
| AC.GT       | 15 | 101731230 | 101731242 | 6.5     | ENSSSCT00000031268 | FAM171B | promoter   | -0.209 | .           | .      | 2 |
| AAAAC.GTTTT | 15 | 101731688 | 101731712 | 4.16667 | ENSSSCT00000031268 | FAM171B | promoter   | 0.028  | rs788995502 | .      | 2 |
| AAAAT.ATTTT | 15 | 101798962 | 101798979 | 3.6     | ENSSSCT00000031268 | FAM171B | intron     | 0.789  | rs793368581 | .      | 2 |
| AAAG.CTTT   | 15 | 102048612 | 102048626 | 3.75    | .                  | .       | intergenic | .      | rs789589410 | .      | 2 |
| AG.CT       | 15 | 102219651 | 102219664 | 7       | .                  | .       | intergenic | 0.004  | rs791899848 | .      | 4 |
| AT.AT       | 15 | 102232735 | 102232746 | 6       | .                  | .       | intergenic | .      | rs791747265 | .      | 2 |
| AT.AT       | 15 | 102247562 | 102247574 | 6.5     | .                  | .       | intergenic | .      | rs788339154 | .      | 3 |
| AC.GT       | 15 | 102253566 | 102253576 | 5.5     | .                  | .       | intergenic | 0.143  | rs790718071 | .      | 2 |
| AAAAT.ATTTT | 15 | 102263170 | 102263187 | 3.6     | .                  | .       | intergenic | 0.098  | .           | .      | 2 |
| AT.AT       | 15 | 102350449 | 102350463 | 7.5     | .                  | .       | intergenic | .      | rs791204366 | .      | 2 |
| AAAC.GTTT   | 15 | 102554773 | 102554787 | 3.75    | ENSSSCT00000017457 | TFPI    | intron     | 0.206  | rs786564939 | .      | 2 |
| ATC.GAT     | 15 | 102574553 | 102574571 | 6.33333 | ENSSSCT00000017457 | TFPI    | intron     | .      | rs786917696 | .      | 2 |
| AAAAG.CTTTT | 15 | 102603782 | 102603799 | 3.6     | .                  | .       | intergenic | -0.213 | rs792673134 | .      | 2 |
| AAAC.GTTT   | 15 | 103075494 | 103075512 | 4.75    | .                  | .       | intergenic | -0.06  | rs355684    | rs7863 | 2 |
| AAAAG.CTTTT | 15 | 103471253 | 103471272 | 3.33333 | .                  | .       | intergenic | .      | .           | .      | 2 |
| AAAC.GTTT   | 15 | 103575418 | 103575444 | 6.75    | .                  | .       | intergenic | 0.117  | rs789829095 | .      | 2 |
| AAAAT.ATTTT | 15 | 103645276 | 103645298 | 4.6     | ENSSSCT00000017458 | .       | intron     | 0.088  | rs791146168 | .      | 2 |
| AAG.CTT     | 15 | 104526071 | 104526086 | 5.33333 | ENSSSCT00000017461 | WDR75   | intron     | .      | rs789575893 | .      | 2 |
| AAAC.GTTT   | 15 | 104529407 | 104529421 | 3.75    | ENSSSCT00000017461 | WDR75   | intron     | .      | .           | .      | 2 |
| AC.GT       | 15 | 104683121 | 104683132 | 6       | .                  | .       | intergenic | .      | rs792737346 | .      | 4 |
| AAC.GTT     | 15 | 105463718 | 105463738 | 7       | ENSSSCT00000017470 | PMS1    | intron     | .      | rs789011680 | .      | 2 |
| AG.CT       | 15 | 105474148 | 105474163 | 8       | ENSSSCT00000017470 | PMS1    | intron     | 0.253  | rs788857317 | .      | 4 |
| AAAC.GTTT   | 15 | 105721186 | 105721214 | 7.25    | .                  | .       | intergenic | .      | rs793235086 | .      | 2 |
| AC.GT       | 15 | 106372335 | 106372349 | 7.5     | .                  | .       | intergenic | 0.138  | .           | .      | 2 |
| AAAT.ATTT   | 15 | 106380143 | 106380160 | 4.5     | .                  | .       | intergenic | 0.447  | rs151923    | rs7936 | 2 |
| AG.CT       | 15 | 106799366 | 106799382 | 8.5     | .                  | .       | intergenic | 0.082  | rs792941401 | .      | 4 |
| AGGG.CCCT   | 15 | 106885200 | 106885218 | 4.75    | .                  | .       | intergenic | 0.139  | rs789960200 | .      | 2 |
| AC.GT       | 15 | 107100988 | 107101010 | 11.5    | .                  | .       | intergenic | 0.033  | rs788611174 | .      | 2 |
| AAAC.GTTT   | 15 | 107270705 | 107270722 | 4.5     | ENSSSCT00000029791 | .       | intron     | .      | rs786849617 | .      | 2 |
| AAAAC.GTTTT | 15 | 107292583 | 107292607 | 5       | .                  | .       | intergenic | -0.061 | rs286016    | rs7911 | 2 |
| AAAT.ATTT   | 15 | 107333159 | 107333173 | 3.75    | .                  | .       | intergenic | .      | rs368439    | rs7903 | 2 |
| AAG.CTT     | 15 | 107463767 | 107463780 | 4.66667 | .                  | .       | intergenic | -0.092 | rs788759473 | .      | 2 |
| AT.AT       | 15 | 107627556 | 107627591 | 18      | .                  | .       | intergenic | .      | rs790116164 | .      | 2 |
| AC.GT       | 15 | 108241436 | 108241476 | 20.5    | ENSSSCT00000017490 | TMEFF2  | intron     | 0.029  | rs792369645 | .      | 4 |
| AT.AT       | 15 | 108359000 | 108359009 | 5       | ENSSSCT00000017490 | TMEFF2  | intron     | 0.125  | rs791250043 | .      | 3 |
| AC.GT       | 15 | 108503250 | 108503260 | 5.5     | .                  | .       | intergenic | 0.131  | .           | .      | 3 |
| ACAT.ATGT   | 15 | 108512707 | 108512737 | 7.75    | .                  | .       | intergenic | -0.345 | rs793428285 | .      | 2 |
| AC.GT       | 15 | 108608676 | 108608687 | 6       | .                  | .       | intergenic | -0.134 | .           | .      | 3 |
| AT.AT       | 15 | 108640333 | 108640342 | 5       | .                  | .       | intergenic | .      | rs789282174 | .      | 3 |
| AAAAG.CTTTT | 15 | 108722656 | 108722675 | 3.33333 | .                  | .       | intergenic | .      | rs790286752 | .      | 2 |
| AC.GT       | 15 | 108814162 | 108814198 | 18.5    | .                  | .       | intergenic | 0.43   | rs793817584 | .      | 2 |
| AT.AT       | 15 | 108956914 | 108956926 | 6.5     | .                  | .       | intergenic | 0.091  | rs182863    | rs7917 | 3 |

|              |    |           |           |         |                    |         |            |        |                  |   |
|--------------|----|-----------|-----------|---------|--------------------|---------|------------|--------|------------------|---|
| AAT.ATT      | 15 | 109191497 | 109191508 | 4       | .                  | .       | intergenic | -0.097 | .                | 2 |
| AAAAT.ATTTT  | 15 | 109403485 | 109403502 | 3.6     | .                  | .       | intergenic | 0.091  | rs792482748      | 2 |
| AT.AT        | 15 | 109410657 | 109410667 | 5.5     | .                  | .       | intergenic | 0.04   | rs792740216      | 3 |
| AT.AT        | 15 | 109549538 | 109549547 | 5       | .                  | .       | intergenic | .      | .                | 4 |
| AT.AT        | 15 | 109573787 | 109573797 | 5.5     | .                  | .       | intergenic | -0.064 | .                | 2 |
| AAAT.ATTT    | 15 | 109841764 | 109841783 | 5       | .                  | .       | intergenic | .      | rs789694109      | 2 |
| AT.AT        | 15 | 109874388 | 109874400 | 6.5     | .                  | .       | intergenic | -0.284 | rs747461 rs7879  | 2 |
| AGAT.ATCT    | 15 | 110295972 | 110296008 | 9.25    | .                  | .       | intergenic | 0.187  | rs731584 rs7888  | 2 |
| AT.AT        | 15 | 110306837 | 110306866 | 15      | .                  | .       | intergenic | .      | rs789875629      | 2 |
| AAAT.ATTT    | 15 | 110310834 | 110310860 | 6.75    | .                  | .       | intergenic | .      | rs75930 rs7901   | 3 |
| AC.GT        | 15 | 110347776 | 110347792 | 8.5     | .                  | .       | intergenic | 0.677  | rs787963884      | 2 |
| AAAC.GTTT    | 15 | 110781780 | 110781798 | 4.75    | .                  | .       | intergenic | 0.057  | rs786740604      | 2 |
| AC.GT        | 15 | 110838111 | 110838126 | 8       | .                  | .       | intergenic | .      | rs742855 rs7921  | 2 |
| AAAC.GTTT    | 15 | 111051623 | 111051636 | 3.5     | ENSSSCT00000017493 | STK17B  | intron     | 0.285  | rs794316 rs7887  | 2 |
| AAAC.GTTT    | 15 | 111064749 | 111064763 | 3.75    | ENSSSCT00000028914 | .       | promoter   | 0.081  | rs702182 rs7872  | 2 |
| AC.GT        | 15 | 111999995 | 112000008 | 7       | ENSSSCT00000025335 | .       | promoter   | 0.164  | rs788572402      | 2 |
| ACCCT.AGGGT  | 15 | 112024852 | 112024873 | 3.66667 | .                  | .       | intergenic | .      | rs793108681      | 2 |
| AC.GT        | 15 | 112089396 | 112089430 | 17.5    | ENSSSCT00000017501 | .       | intron     | -0.077 | rs788132 rs7874  | 3 |
| AT.AT        | 15 | 112130273 | 112130285 | 6.5     | ENSSSCT00000017501 | .       | intron     | 0.264  | rs789383769      | 3 |
| AAAAT.ATTTT  | 15 | 112332226 | 112332244 | 3.8     | ENSSSCT00000017501 | .       | intron     | 0.289  | rs790554071      | 2 |
| AAAC.GTTT    | 15 | 112354131 | 112354150 | 5       | ENSSSCT00000017501 | .       | intron     | 0.14   | rs789065721      | 2 |
| AAAT.ATTT    | 15 | 112451393 | 112451416 | 6       | ENSSSCT00000017503 | SF3B1   | intron     | 0.316  | rs793790133      | 2 |
| AAAC.GTTT    | 15 | 112483180 | 112483198 | 4.75    | .                  | .       | intergenic | 0.238  | rs793542383      | 3 |
| AAC.GTT      | 15 | 112506392 | 112506407 | 5.33333 | .                  | .       | intergenic | .      | rs756404 rs7910  | 2 |
| AAAAAT.ATTTT | 15 | 112553678 | 112553697 | 3.33333 | .                  | .       | intergenic | .      | rs788390624      | 2 |
| AC.GT        | 15 | 112868467 | 112868490 | 12      | .                  | .       | intergenic | 0.051  | rs787825690      | 4 |
| AC.GT        | 15 | 113022897 | 113022915 | 9.5     | .                  | .       | intergenic | .      | rs787800778      | 2 |
| AAAC.GTTT    | 15 | 113077456 | 113077476 | 5.25    | .                  | .       | intergenic | -0.093 | rs793286634      | 2 |
| AAC.GTT      | 15 | 113195289 | 113195302 | 4.66667 | .                  | .       | intergenic | -0.313 | rs788961736      | 2 |
| AC.GT        | 15 | 113199600 | 113199618 | 9.5     | .                  | .       | intergenic | 0.064  | rs7937340 rs7938 | 3 |
| AATG.CATT    | 15 | 113275272 | 113275289 | 4.5     | .                  | .       | intergenic | 0.145  | rs792733667      | 2 |
| AAAG.CTTT    | 15 | 113532911 | 113532930 | 5       | .                  | .       | intergenic | -0.312 | .                | 2 |
| AATG.CATT    | 15 | 113593933 | 113593955 | 5.75    | .                  | .       | intergenic | 0.042  | rs789183064      | 2 |
| AAAAG.GTTTT  | 15 | 113616171 | 113616186 | 3.2     | .                  | .       | intergenic | .      | rs7690870914     | 2 |
| AAT.ATT      | 15 | 113725391 | 113725403 | 4.33333 | .                  | .       | intergenic | .      | rs791167 rs7932  | 2 |
| AC.GT        | 15 | 113762221 | 113762235 | 7.5     | .                  | .       | intergenic | 0.193  | .                | 4 |
| AC.GT        | 15 | 113932454 | 113932468 | 7.5     | .                  | .       | intergenic | 0.056  | rs790521332      | 2 |
| AC.GT        | 15 | 114124732 | 114124748 | 8.5     | .                  | .       | intergenic | 0.609  | rs789718198      | 2 |
| AAAC.GTTT    | 15 | 114160306 | 114160338 | 8.25    | .                  | .       | intergenic | 0.188  | .                | 4 |
| AAAC.GTTT    | 15 | 114602624 | 114602638 | 3.75    | .                  | .       | intergenic | .      | rs7124687 rs7903 | 2 |
| AAAC.GTTT    | 15 | 114810036 | 114810055 | 5       | .                  | .       | intergenic | .      | rs786803074      | 3 |
| AT.AT        | 15 | 114813014 | 114813023 | 5       | .                  | .       | intergenic | 0.101  | .                | 3 |
| AAAG.CTTT    | 15 | 114938164 | 114938185 | 5.5     | .                  | .       | intergenic | 0.035  | rs792073771      | 2 |
| AAAC.GTTT    | 15 | 114975818 | 114975845 | 7       | .                  | .       | intergenic | 0.094  | rs790978672      | 2 |
| AAAC.GTTT    | 15 | 114977058 | 114977084 | 6.75    | .                  | .       | intergenic | 0      | rs790228788      | 2 |
| AAAAG.CTTTT  | 15 | 115273433 | 115273454 | 4.4     | ENSSSCT00000017518 | SPATS2L | intron     | 0.163  | .                | 2 |
| AC.GT        | 15 | 115297523 | 115297534 | 6       | ENSSSCT00000017518 | SPATS2L | intron     | 0.986  | rs756915 rs7889  | 2 |
| AAAC.GTTT    | 15 | 115358312 | 115358340 | 7.25    | ENSSSCT00000017519 | .       | intron     | .      | rs791739267      | 2 |
| AAAC.GTTT    | 15 | 115491394 | 115491409 | 4       | ENSSSCT00000027335 | AOX1    | intron     | -0.016 | rs793097205      | 2 |
| AT.AT        | 15 | 115498717 | 115498728 | 6       | ENSSSCT00000027335 | AOX1    | intron     | 0.035  | .                | 2 |
| AT.AT        | 15 | 115589646 | 115589655 | 5       | .                  | .       | intergenic | .      | .                | 3 |
| AAT.ATT      | 15 | 115729485 | 115729496 | 4       | .                  | .       | intergenic | -0.217 | rs7437829 rs7886 | 2 |
| AAC.GTT      | 15 | 115737379 | 115737397 | 6.33333 | ENSSSCT00000017522 | BZW1    | intron     | .      | rs793150996      | 4 |
| AT.AT        | 15 | 115827525 | 115827534 | 5       | ENSSSCT00000017521 | .       | intron     | 0.048  | .                | 2 |
| AAAC.GTTT    | 15 | 116098836 | 116098859 | 6       | .                  | .       | intergenic | .      | rs786469 rs7896  | 2 |
| AC.GT        | 15 | 116118593 | 116118615 | 11.5    | ENSSSCT00000017531 | FLIP-L  | intron     | .      | rs793247754      | 2 |
| AAAC.GTTT    | 15 | 116212187 | 116212209 | 5.75    | .                  | .       | intergenic | 0.022  | rs786651658      | 2 |
| AAAC.GTTT    | 15 | 117416845 | 117416864 | 5       | .                  | .       | intergenic | .      | rs793387572      | 2 |
| AAAT.ATTT    | 15 | 117445814 | 117445826 | 3.25    | ENSSSCT00000017544 | BMP2    | intron     | .      | rs791857228      | 2 |
| AAAG.CTTT    | 15 | 117461648 | 117461662 | 3.75    | ENSSSCT00000017544 | BMP2    | intron     | .      | rs767276 rs6962  | 2 |
| AT.AT        | 15 | 117748751 | 117748763 | 6.5     | .                  | .       | intergenic | .      | rs792360520      | 3 |
| AG.CT        | 15 | 117761028 | 117761037 | 5       | .                  | .       | intergenic | .      | .                | 2 |
| AT.AT        | 15 | 117858850 | 117858859 | 5       | ENSSSCT00000017547 | WDR12   | promoter   | 0.147  | rs791566384      | 2 |
| AT.AT        | 15 | 117944975 | 117944988 | 7       | .                  | .       | intergenic | 0.212  | rs792168015      | 2 |
| AG.CT        | 15 | 118505636 | 118505653 | 9       | .                  | .       | intergenic | 1.948  | rs793397474      | 2 |
| ATCC.GGAT    | 15 | 118706823 | 118706844 | 5.5     | ENSSSCT00000024007 | ICOS    | intron     | 0.168  | rs786547664      | 2 |
| AG.CT        | 15 | 118816275 | 118816285 | 5.5     | .                  | .       | intergenic | 0.285  | rs787317433      | 3 |
| AATT.AATT    | 15 | 118857318 | 118857337 | 5       | .                  | .       | intergenic | -0.165 | rs764511 rs7867  | 2 |
| AAT.ATT      | 15 | 118881133 | 118881146 | 4.66667 | .                  | .       | intergenic | 0.599  | rs789498980      | 2 |
| AAAC.GTTT    | 15 | 118991571 | 118991585 | 3.75    | .                  | .       | intergenic | .      | rs727904 rs7867  | 2 |
| AAAC.GTTT    | 15 | 119178698 | 119178713 | 4       | .                  | .       | intergenic | 0.146  | rs793163140      | 2 |
| AC.GT        | 15 | 119186487 | 119186503 | 8.5     | .                  | .       | intergenic | 0.101  | .                | 2 |
| AAAC.GTTT    | 15 | 119249841 | 119249863 | 5.75    | .                  | .       | intergenic | .      | rs792044808      | 2 |
| AT.AT        | 15 | 119274892 | 119274909 | 9       | .                  | .       | intergenic | -0.005 | rs793367622      | 2 |
| AG.CT        | 15 | 119283674 | 119283689 | 8       | .                  | .       | intergenic | -0.125 | rs792856383      | 2 |
| AC.GT        | 15 | 119307092 | 119307122 | 15.5    | .                  | .       | intergenic | .      | rs786680174      | 2 |
| AAAAC.GTTTT  | 15 | 119387730 | 119387748 | 3.8     | .                  | .       | intergenic | .      | rs789695395      | 2 |
| AT.AT        | 15 | 119651208 | 119651222 | 7.5     | .                  | .       | intergenic | -0.026 | rs790052483      | 3 |
| AAAC.GTTT    | 15 | 119807648 | 119807667 | 5       | .                  | .       | intergenic | 0.725  | rs790057807      | 2 |
| AG.CT        | 15 | 119823450 | 119823460 | 5.5     | .                  | .       | intergenic | -0.048 | .                | 2 |
| AC.GT        | 15 | 120472082 | 120472096 | 7.5     | ENSSSCT00000017554 | .       | intron     | -0.066 | rs7341928 rs7871 | 2 |
| AC.GT        | 15 | 120666845 | 120666855 | 5.5     | .                  | .       | intergenic | .      | rs788224087      | 2 |
| AAC.GTT      | 15 | 120709771 | 120709787 | 5.66667 | .                  | .       | intergenic | 0.239  | rs790458004      | 2 |
| AAAAAT.ATTTT | 15 | 120942261 | 120942279 | 3.16667 | .                  | .       | intergenic | .      | rs788870431      | 2 |

|              |    |           |           |         |                    |          |            |        |               |   |
|--------------|----|-----------|-----------|---------|--------------------|----------|------------|--------|---------------|---|
| AAAT.ATTT    | 15 | 121002793 | 121002807 | 3.75    | ENSSSCT00000017560 | EEF1B2   | intron     | 4.2    | rs791434178   | 2 |
| AAAT.ATTT    | 15 | 121002793 | 121002807 | 3.75    | ENSSSCT00000020378 | snoZ196  | promoter   | 4.2    | rs791434178   | 2 |
| AAAT.ATTT    | 15 | 121002793 | 121002807 | 3.75    | ENSSSCT00000021282 | SNORA41  | promoter   | 4.2    | rs791434178   | 2 |
| AAAAT.ATTTT  | 15 | 121176010 | 121176029 | 4       | .                  | .        | intergenic | 0.145  | rs793494655   | 2 |
| AAAAG.CTTTT  | 15 | 121204412 | 121204435 | 4.8     | .                  | .        | intergenic | .      | rs788674562   | 2 |
| \AAAAG.CTTTT | 15 | 121448643 | 121448667 | 4.16667 | ENSSSCT00000017564 | ADAM23   | intron     | -0.002 | .             | 2 |
| AT.AT        | 15 | 121525816 | 121525826 | 5.5     | .                  | .        | intergenic | 0.475  | .             | 2 |
| AAAG.CTTT    | 15 | 121535733 | 121535751 | 4.75    | .                  | .        | intergenic | 0.103  | 337956 rs7911 | 2 |
| AAAC.GTTT    | 15 | 121668445 | 121668459 | 3.75    | .                  | .        | intergenic | 0.022  | 324278 rs7907 | 2 |
| AAAAC.GTTTT  | 15 | 121930930 | 121930953 | 4.8     | .                  | .        | intergenic | 0.183  | 313851 rs7886 | 2 |
| AC.GT        | 15 | 121945475 | 121945489 | 7.5     | .                  | .        | intergenic | 0.607  | .             | 2 |
| AAAC.GTTT    | 15 | 122027580 | 122027596 | 4.25    | .                  | .        | intergenic | 0.416  | 313866 rs7877 | 2 |
| AAAT.ATTT    | 15 | 122117248 | 122117266 | 4.75    | .                  | .        | intergenic | -0.016 | .             | 2 |
| AG.CT        | 15 | 122150011 | 122150028 | 9       | .                  | .        | intergenic | 1.026  | rs788382420   | 2 |
| AAC.GTT      | 15 | 122187663 | 122187679 | 5.66667 | .                  | .        | intergenic | -0.105 | rs790520205   | 2 |
| AG.CT        | 15 | 122197176 | 122197188 | 6.5     | .                  | .        | intergenic | 0.372  | rs790368228   | 2 |
| AAAC.GTTT    | 15 | 122290296 | 122290318 | 5.75    | .                  | .        | intergenic | .      | rs793042700   | 2 |
| \AAAAG.CTTTT | 15 | 122324222 | 122324245 | 4       | .                  | .        | intergenic | 0.534  | 340437 rs7934 | 2 |
| \AAAAG.CTTTT | 15 | 122373547 | 122373572 | 4.33333 | ENSSSCT00000025237 | METTL21A | 3'utr      | 0.29   | rs789559994   | 2 |
| AC.GT        | 15 | 122414927 | 122414946 | 10      | .                  | .        | intergenic | 0.214  | .             | 4 |
| AT.AT        | 15 | 122568454 | 122568473 | 10      | ENSSSCT00000022797 | .        | intron     | 0.109  | 209632 rs7910 | 5 |
| AAAT.ATTT    | 15 | 122839978 | 122839990 | 3.25    | .                  | .        | intergenic | 0.027  | rs789472264   | 2 |
| AAC.GTT      | 15 | 122866014 | 122866027 | 4.66667 | ENSSSCT00000026412 | IDH1     | intron     | 1.615  | rs793724428   | 3 |
| AC.GT        | 15 | 122939050 | 122939070 | 10.5    | ENSSSCT00000017580 | PIKFYVE  | intron     | 0.212  | rs787951199   | 4 |
| AC.GT        | 15 | 122947648 | 122947659 | 6       | ENSSSCT00000017580 | PIKFYVE  | intron     | .      | .             | 2 |
| AC.GT        | 15 | 122968164 | 122968174 | 5.5     | ENSSSCT00000017580 | PIKFYVE  | intron     | .      | rs787280776   | 4 |
| AAAC.GTTT    | 15 | 123148514 | 123148530 | 4.25    | ENSSSCT00000017581 | PTH2R    | intron     | 0.128  | rs790183989   | 2 |
| AC.GT        | 15 | 123206204 | 123206216 | 6.5     | .                  | .        | intergenic | .      | .             | 2 |
| AAAAC.GTTTT  | 15 | 123266809 | 123266845 | 7.4     | .                  | .        | intergenic | .      | rs791613716   | 2 |
| AT.AT        | 15 | 123393198 | 123393210 | 6.5     | .                  | .        | intergenic | .      | rs790719904   | 2 |
| AT.AT        | 15 | 123484761 | 123484770 | 5       | .                  | .        | intergenic | 0.13   | rs789113459   | 2 |
| AAAAC.GTTTT  | 15 | 123537363 | 123537383 | 4.2     | .                  | .        | intergenic | 0.197  | rs791740796   | 2 |
| AAT.ATT      | 15 | 123638217 | 123638242 | 8.66667 | .                  | .        | intergenic | -0.03  | rs792979141   | 2 |
| AT.AT        | 15 | 123684816 | 123684835 | 10      | .                  | .        | intergenic | .      | rs791016705   | 2 |
| AC.GT        | 15 | 123839468 | 123839484 | 8.5     | .                  | .        | intergenic | 0.007  | 379550 rs7871 | 3 |
| AC.GT        | 15 | 123903359 | 123903369 | 5.5     | .                  | .        | intergenic | 0.283  | rs786410197   | 2 |
| AAAT.ATTT    | 15 | 123920586 | 123920603 | 4.5     | .                  | .        | intergenic | 0.019  | 355286 rs7921 | 2 |
| AAT.ATT      | 15 | 123953245 | 123953282 | 12.6667 | .                  | .        | intergenic | 0.239  | rs787412146   | 2 |
| AAAT.ATTT    | 15 | 124013974 | 124014002 | 7.25    | .                  | .        | intergenic | .      | 37597 rs7889  | 2 |
| AAAC.GTTT    | 15 | 124061325 | 124061344 | 5       | .                  | .        | intergenic | 0.507  | 305097 rs7881 | 2 |
| AAC.GTT      | 15 | 124088928 | 124088948 | 7       | .                  | .        | intergenic | 0.082  | 34825 rs7914  | 4 |
| AAC.GTT      | 15 | 124220854 | 124220869 | 5.33333 | ENSSSCT00000017586 | UNC80    | intron     | -0.08  | 729699 rs7897 | 2 |
| AAC.GTT      | 15 | 124220854 | 124220869 | 5.33333 | ENSSSCT00000030483 | UNC80    | intron     | -0.08  | 729699 rs7897 | 2 |
| AAAC.GTTT    | 15 | 124266384 | 124266408 | 6.25    | ENSSSCT00000017586 | UNC80    | intron     | 0.096  | rs791516435   | 2 |
| AAAC.GTTT    | 15 | 124266384 | 124266408 | 6.25    | ENSSSCT00000030483 | UNC80    | intron     | 0.096  | rs791516435   | 2 |
| AAAC.GTTT    | 15 | 124366837 | 124366849 | 3.25    | ENSSSCT00000017586 | UNC80    | intron     | 0.256  | 382478 rs7873 | 2 |
| AAAC.GTTT    | 15 | 124366837 | 124366849 | 3.25    | ENSSSCT00000030483 | UNC80    | intron     | 0.256  | 382478 rs7873 | 2 |
| AAAAT.ATTTT  | 15 | 124384441 | 124384459 | 3.8     | ENSSSCT00000017586 | UNC80    | intron     | 0.044  | 387053 rs7911 | 2 |
| AAAAT.ATTTT  | 15 | 124384441 | 124384459 | 3.8     | ENSSSCT00000030483 | UNC80    | intron     | 0.044  | 387053 rs7911 | 2 |
| AG.CT        | 15 | 124425186 | 124425202 | 8.5     | ENSSSCT00000017586 | UNC80    | intron     | 0.328  | rs792284114   | 3 |
| AG.CT        | 15 | 124425186 | 124425202 | 8.5     | ENSSSCT00000030483 | UNC80    | intron     | 0.328  | rs792284114   | 3 |
| AC.GT        | 15 | 124431066 | 124431078 | 6.5     | ENSSSCT00000017586 | UNC80    | intron     | 0.204  | rs786726237   | 2 |
| AC.GT        | 15 | 124431066 | 124431078 | 6.5     | ENSSSCT00000030483 | UNC80    | intron     | 0.204  | rs786726237   | 2 |
| AG.CT        | 15 | 124625284 | 124625300 | 8.5     | ENSSSCT00000029240 | KANSL1L  | intron     | 0.217  | rs788010873   | 2 |
| AG.CT        | 15 | 124625284 | 124625300 | 8.5     | ENSSSCT00000025006 | KANSL1L  | intron     | 0.217  | rs788010873   | 2 |
| AG.CT        | 15 | 124625284 | 124625300 | 8.5     | ENSSSCT00000031966 | KANSL1L  | intron     | 0.217  | rs788010873   | 2 |
| AT.AT        | 15 | 124910138 | 124910149 | 6       | .                  | .        | intergenic | 0.219  | .             | 2 |
| AC.GT        | 15 | 125140661 | 125140681 | 10.5    | .                  | .        | intergenic | .      | .             | 2 |
| AAC.GTT      | 15 | 125339179 | 125339194 | 5.33333 | .                  | .        | intergenic | -0.022 | 385248 rs7908 | 2 |
| AC.GT        | 15 | 125491436 | 125491448 | 6.5     | .                  | .        | intergenic | 0.131  | .             | 4 |
| AAAC.GTTT    | 15 | 125551210 | 125551224 | 3.75    | .                  | .        | intergenic | -0.019 | 320536 rs7917 | 2 |
| AG.CT        | 15 | 125769237 | 125769250 | 7       | .                  | .        | intergenic | -0.042 | 360499 rs7911 | 3 |
| AC.GT        | 15 | 125926827 | 125926837 | 5.5     | ENSSSCT00000027992 | .        | intron     | -0.068 | rs789442837   | 2 |
| AAC.GTT      | 15 | 125940029 | 125940048 | 6.66667 | ENSSSCT00000027992 | .        | intron     | -0.137 | rs789773521   | 2 |
| AAT.ATT      | 15 | 125989313 | 125989336 | 8       | .                  | .        | intergenic | 0.035  | rs792938575   | 2 |
| AAAT.ATTT    | 15 | 126072565 | 126072595 | 7.75    | .                  | .        | intergenic | 0.145  | rs787276346   | 2 |
| AC.GT        | 15 | 126174829 | 126174851 | 11.5    | ENSSSCT00000017595 | .        | intron     | -0.106 | .             | 6 |
| AT.AT        | 15 | 126307265 | 126307289 | 12.5    | .                  | .        | intergenic | 0.001  | 391647 rs7914 | 2 |
| AAT.ATT      | 15 | 126391992 | 126392009 | 6       | .                  | .        | intergenic | -0.142 | rs789061113   | 2 |
| AAAG.CTTT    | 15 | 126943131 | 126943145 | 3.75    | .                  | .        | intergenic | -0.089 | rs787713420   | 2 |
| AC.GT        | 15 | 127092595 | 127092609 | 7.5     | .                  | .        | intergenic | -0.085 | rs786515342   | 2 |
| AAC.GTT      | 15 | 127273680 | 127273691 | 4       | .                  | .        | intergenic | .      | rs791642174   | 2 |
| AAT.ATT      | 15 | 127299191 | 127299209 | 6.33333 | .                  | .        | intergenic | -0.132 | rs792230351   | 2 |
| AT.AT        | 15 | 127405836 | 127405847 | 6       | .                  | .        | intergenic | 1.273  | 372288 rs7928 | 3 |
| AAAC.GTTT    | 15 | 127410267 | 127410293 | 6.75    | .                  | .        | intergenic | 0.207  | 125571 rs7931 | 2 |
| AAAT.ATTT    | 15 | 127809072 | 127809098 | 6.75    | .                  | .        | intergenic | 0.125  | rs793591478   | 2 |
| AAT.ATT      | 15 | 127888251 | 127888271 | 7       | .                  | .        | intergenic | 0.17   | 314510 rs7931 | 2 |
| AG.CT        | 15 | 127977067 | 127977078 | 6       | .                  | .        | intergenic | 0.876  | rs787610732   | 2 |
| AAC.GTT      | 15 | 128088030 | 128088043 | 4.66667 | .                  | .        | intergenic | .      | rs790124933   | 3 |
| ACCT.AGGT    | 15 | 128344102 | 128344124 | 5.75    | .                  | .        | intergenic | 0.237  | rs793018247   | 2 |
| AAC.GTT      | 15 | 128386939 | 128386964 | 8.66667 | .                  | .        | intergenic | .      | rs791258576   | 2 |
| AG.CT        | 15 | 128480964 | 128480978 | 7.5     | .                  | .        | intergenic | 0.301  | .             | 2 |
| AT.AT        | 15 | 128650188 | 128650218 | 15.5    | .                  | .        | intergenic | 0.054  | rs791806284   | 2 |
| \AAAAC.GTTTT | 15 | 128747966 | 128747988 | 3.83333 | .                  | .        | intergenic | -0.111 | rs786701728   | 2 |



|              |    |           |           |         |                    |       |            |        |               |   |
|--------------|----|-----------|-----------|---------|--------------------|-------|------------|--------|---------------|---|
| AAC.GTT      | 15 | 128995624 | 128995644 | 7       | .                  | .     | intergenic | 0.045  | 341136 rs7932 | 2 |
| AT.AT        | 15 | 129377393 | 129377403 | 5.5     | .                  | .     | intergenic | .      | rs786659537   | 3 |
| AAC.GTT      | 15 | 129544788 | 129544801 | 4.66667 | .                  | .     | intergenic | -0.001 | rs788579348   | 2 |
| AAC.GTT      | 15 | 129546602 | 129546617 | 5.33333 | .                  | .     | intergenic | .      | .             | 2 |
| AAAAAT.ATTTT | 15 | 129566300 | 129566319 | 3.33333 | .                  | .     | intergenic | 0.087  | .             | 2 |
| AT.AT        | 15 | 129576559 | 129576568 | 5       | .                  | .     | intergenic | .      | .             | 2 |
| AAAC.GTTT    | 15 | 129577752 | 129577770 | 4.75    | .                  | .     | intergenic | 0.086  | 770378 rs7865 | 2 |
| AAAAG.CTTTT  | 15 | 129686945 | 129686970 | 5.2     | .                  | .     | intergenic | 0.277  | 315689 rs7863 | 2 |
| AT.AT        | 15 | 129709107 | 129709124 | 9       | .                  | .     | intergenic | -0.081 | 163845 rs7925 | 4 |
| AG.CT        | 15 | 130440174 | 130440184 | 5.5     | .                  | .     | intergenic | .      | rs790056433   | 3 |
| AC.GT        | 15 | 130607462 | 130607471 | 5       | .                  | .     | intergenic | -0.003 | .             | 2 |
| ATC.GAT      | 15 | 130752031 | 130752057 | 9       | .                  | .     | intergenic | 0.018  | rs788107186   | 4 |
| AAC.GTT      | 15 | 131052471 | 131052487 | 5.66667 | ENSSSCT00000017612 | MREG  | intron     | .      | 170863 rs7923 | 2 |
| AC.GT        | 15 | 131182674 | 131182690 | 8.5     | ENSSSCT00000028863 | PECR  | intron     | 0.144  | rs793625575   | 2 |
| AC.GT        | 15 | 131490529 | 131490557 | 14.5    | .                  | .     | intergenic | 0.039  | rs791366203   | 2 |
| AG.CT        | 15 | 131652973 | 131652984 | 6       | .                  | .     | intergenic | .      | rs789426217   | 2 |
| AAAC.GTTT    | 15 | 131820398 | 131820410 | 3.25    | .                  | .     | intergenic | 0.074  | rs792824034   | 2 |
| AT.AT        | 15 | 131842442 | 131842457 | 8       | .                  | .     | intergenic | -0.011 | .             | 2 |
| AG.CT        | 15 | 132618887 | 132618908 | 11      | .                  | .     | intergenic | -0.312 | 392660 rs7903 | 4 |
| AAAAT.ATTTT  | 15 | 132658135 | 132658154 | 4       | .                  | .     | intergenic | -0.093 | rs787778090   | 2 |
| AG.CT        | 15 | 132775836 | 132775846 | 5.5     | .                  | .     | intergenic | 1.068  | rs788844613   | 2 |
| AC.GT        | 15 | 133250493 | 133250509 | 8.5     | ENSSSCT00000017620 | RUFY4 | intron     | -0.13  | .             | 2 |
| AAAC.GTTT    | 15 | 133477499 | 133477514 | 4       | ENSSSCT00000017637 | VIL1  | promoter   | .      | rs793873913   | 2 |
| AAC.GTT      | 15 | 133822441 | 133822455 | 5       | ENSSSCT00000032395 | .     | intron     | .      | .             | 4 |
| AAC.GTT      | 15 | 133822441 | 133822455 | 5       | ENSSSCT00000031662 | .     | intron     | .      | .             | 4 |
| AAAC.GTTT    | 15 | 134257965 | 134257979 | 3.75    | ENSSSCT00000017654 | GLB1L | intron     | 0.065  | rs787468597   | 2 |
| AG.CT        | 15 | 134761723 | 134761739 | 8.5     | .                  | .     | intergenic | -0.053 | rs793758891   | 2 |
| AT.AT        | 15 | 134808887 | 134808897 | 5.5     | .                  | .     | intergenic | 0.057  | rs790597621   | 2 |
| AAG.CTT      | 15 | 135236177 | 135236196 | 6.66667 | .                  | .     | intergenic | 0.386  | rs788642913   | 2 |
| AAG.CTT      | 15 | 135250247 | 135250261 | 5       | .                  | .     | intergenic | -0.071 | 324102 rs7916 | 2 |
| AAAC.GTTT    | 15 | 135354595 | 135354609 | 3.75    | .                  | .     | intergenic | 0.129  | rs787558168   | 2 |
| AC.GT        | 15 | 135361203 | 135361215 | 6.5     | .                  | .     | intergenic | 0.266  | .             | 2 |
| AG.CT        | 15 | 135397119 | 135397133 | 7.5     | .                  | .     | intergenic | -0.077 | rs787396458   | 2 |
| AAT.ATT      | 15 | 135402649 | 135402670 | 7.33333 | .                  | .     | intergenic | 1.518  | 161516 rs7933 | 2 |
| AAG.CCTT     | 15 | 135465667 | 135465693 | 6.75    | .                  | .     | intergenic | 0.007  | rs786582615   | 2 |
| AAAAG.CTTTT  | 15 | 135898651 | 135898669 | 3.8     | .                  | .     | intergenic | 1.663  | rs789090798   | 2 |
| AC.GT        | 15 | 135957380 | 135957390 | 5.5     | .                  | .     | intergenic | -0.159 | .             | 3 |
| AG.CT        | 15 | 135978378 | 135978394 | 8.5     | .                  | .     | intergenic | .      | .             | 4 |
| ATCC.GGAT    | 15 | 136127507 | 136127528 | 5.5     | .                  | .     | intergenic | -0.158 | 358927 rs7888 | 3 |
| AG.CT        | 15 | 136136511 | 136136530 | 10      | .                  | .     | intergenic | -0.009 | rs793370809   | 2 |
| AC.GT        | 15 | 136154645 | 136154657 | 6.5     | .                  | .     | intergenic | -0.013 | rs788798023   | 2 |
| AC.GT        | 15 | 136338461 | 136338493 | 16.5    | .                  | .     | intergenic | -0.123 | rs793785114   | 3 |
| AT.AT        | 15 | 136338904 | 136338913 | 5       | .                  | .     | intergenic | -0.047 | .             | 3 |
| AAAAAC.GTTTT | 15 | 136473220 | 136473248 | 4.83333 | .                  | .     | intergenic | 0.117  | rs792761591   | 2 |
| AAAC.GTTT    | 15 | 136520783 | 136520805 | 5.75    | .                  | .     | intergenic | 0.003  | 148725 rs7868 | 2 |
| AAAC.GTTT    | 15 | 136649364 | 136649380 | 4.25    | .                  | .     | intergenic | -0.039 | rs786563860   | 2 |
| AAAC.GTTT    | 15 | 137044900 | 137044915 | 4       | .                  | .     | intergenic | .      | 297032 rs7905 | 2 |
| AT.AT        | 15 | 137065803 | 137065817 | 7.5     | .                  | .     | intergenic | 0.152  | .             | 4 |
| AAGG.CCTT    | 15 | 137087797 | 137087823 | 6.75    | .                  | .     | intergenic | 0.06   | 719408 rs7934 | 3 |
| AC.GT        | 15 | 137101018 | 137101027 | 5       | .                  | .     | intergenic | .      | rs692147440   | 4 |
| AG.CT        | 15 | 137132053 | 137132071 | 9.5     | .                  | .     | intergenic | 0.107  | .             | 3 |
| AAAAC.GTTTT  | 15 | 137196361 | 137196378 | 3.6     | .                  | .     | intergenic | -0.225 | rs789669619   | 2 |
| AAAC.GTTT    | 15 | 137216831 | 137216852 | 5.5     | .                  | .     | intergenic | .      | rs787717379   | 2 |
| AG.CT        | 15 | 137428177 | 137428200 | 12      | .                  | .     | intergenic | -0.021 | .             | 2 |
| AAAT.ATTT    | 15 | 137438937 | 137438954 | 4.5     | .                  | .     | intergenic | 0.179  | 366256 rs7874 | 2 |
| AAAG.CTTT    | 15 | 137682720 | 137682738 | 4.75    | .                  | .     | intergenic | 0.455  | rs787411539   | 2 |
| AGG.CCT      | 15 | 137701254 | 137701267 | 4.66667 | .                  | .     | intergenic | -0.105 | rs790191279   | 2 |
| AAT.ATT      | 15 | 137855481 | 137855494 | 4.66667 | .                  | .     | intergenic | 0.086  | rs789242092   | 2 |
| AAAG.CTTT    | 15 | 137936064 | 137936093 | 7.5     | .                  | .     | intergenic | 0.147  | rs790239524   | 2 |
| AAAG.CTTT    | 15 | 137960242 | 137960255 | 3.5     | .                  | .     | intergenic | -0.188 | rs787309802   | 2 |
| AAAC.GTTT    | 15 | 137969686 | 137969700 | 3.75    | ENSSSCT00000017668 | .     | intron     | 0.092  | rs788067326   | 2 |
| AAT.ATT      | 15 | 137973918 | 137973935 | 6       | ENSSSCT00000017668 | .     | intron     | 0.228  | rs786778572   | 4 |
| AT.AT        | 15 | 138585721 | 138585731 | 5.5     | .                  | .     | intergenic | -0.234 | .             | 4 |
| AAC.GTT      | 15 | 139030955 | 139030968 | 4.66667 | .                  | .     | intergenic | .      | rs791106912   | 2 |
| AAG.CTT      | 15 | 139100890 | 139100909 | 6.66667 | .                  | .     | intergenic | .      | rs791614943   | 2 |
| AAAAG.CTTTT  | 15 | 139204125 | 139204143 | 3.8     | ENSSSCT00000017676 | PN-1  | intron     | -0.248 | rs792865622   | 2 |
| AAAAG.CTTTT  | 15 | 139204125 | 139204143 | 3.8     | ENSSSCT00000036636 | PN-1  | intron     | -0.248 | rs792865622   | 2 |
| AC.GT        | 15 | 139275707 | 139275718 | 6       | .                  | .     | intergenic | 0.151  | .             | 3 |
| AAAT.ATTT    | 15 | 139291369 | 139291391 | 5.75    | .                  | .     | intergenic | 0.576  | rs788604842   | 2 |
| AAAT.ATTT    | 15 | 139309245 | 139309262 | 4.5     | .                  | .     | intergenic | .      | rs793172179   | 3 |
| AAAT.ATTT    | 15 | 139327230 | 139327247 | 4.5     | .                  | .     | intergenic | -0.486 | rs788996463   | 2 |
| AC.GT        | 15 | 139365057 | 139365071 | 7.5     | .                  | .     | intergenic | 0.025  | rs793001972   | 2 |
| ACAT.ATGT    | 15 | 139459242 | 139459266 | 6.25    | .                  | .     | intergenic | -0.06  | .             | 2 |
| AAAAG.CTTTT  | 15 | 139579527 | 139579549 | 4.6     | .                  | .     | intergenic | -0.103 | .             | 2 |
| AAAC.GTTT    | 15 | 139605261 | 139605275 | 3.75    | .                  | .     | intergenic | -0.012 | 336829 rs7897 | 3 |
| AAAAT.ATTTT  | 15 | 139793007 | 139793031 | 5       | .                  | .     | intergenic | 0.07   | rs790207634   | 2 |
| AAAC.GTTT    | 15 | 139834560 | 139834582 | 5.75    | .                  | .     | intergenic | 0.019  | rs787836528   | 2 |
| AAAAC.GTTTT  | 15 | 139977808 | 139977837 | 6       | ENSSSCT00000017680 | .     | intron     | -0.181 | rs790790857   | 2 |
| AAATG.CATTT  | 15 | 139981195 | 139981213 | 3.8     | ENSSSCT00000017680 | .     | intron     | -0.035 | rs791916773   | 2 |
| AAC.GTT      | 15 | 140056559 | 140056572 | 4.66667 | ENSSSCT00000017680 | .     | intron     | .      | 319323 rs7890 | 2 |
| AAAT.ATTT    | 15 | 140216073 | 140216099 | 6.75    | .                  | .     | intergenic | -0.02  | rs789477380   | 3 |
| AAAC.GTTT    | 15 | 140222140 | 140222158 | 4.75    | .                  | .     | intergenic | -0.115 | rs786766489   | 2 |
| AT.AT        | 15 | 140549396 | 140549407 | 6       | ENSSSCT00000017682 | NYAP2 | intron     | .      | rs792087984   | 2 |
| AG.CT        | 15 | 140611525 | 140611534 | 5       | ENSSSCT00000017682 | NYAP2 | intron     | -0.201 | rs789082819   | 2 |

|               |    |           |           |         |                    |        |            |        |                 |   |
|---------------|----|-----------|-----------|---------|--------------------|--------|------------|--------|-----------------|---|
| AT.AT         | 15 | 140633616 | 140633637 | 11      | ENSSSCT00000017682 | NYAP2  | intron     | 0.5    | rs792742109     | 2 |
| AC.GT         | 15 | 140642691 | 140642703 | 6.5     | .                  | .      | intergenic | -0.034 | rs786654640     | 6 |
| AAG.CTT       | 15 | 140784227 | 140784241 | 5       | .                  | .      | intergenic | -0.182 | rs790075590     | 2 |
| CACCC.GGGTG   | 15 | 141163693 | 141163723 | 5.16667 | .                  | .      | intergenic | -0.069 | rs789539416     | 2 |
| AT.AT         | 15 | 141423858 | 141423878 | 10.5    | .                  | .      | intergenic | .      | .               | 2 |
| AAT.ATT       | 15 | 141514377 | 141514395 | 6.33333 | .                  | .      | intergenic | -0.09  | rs793862751     | 2 |
| AC.GT         | 15 | 141800338 | 141800352 | 7.5     | .                  | .      | intergenic | 0.081  | rs788499365     | 3 |
| AGCT.AGCT     | 15 | 141809488 | 141809507 | 5       | .                  | .      | intergenic | 0.065  | rs790283056     | 2 |
| AAAAC.GTTTT   | 15 | 141862613 | 141862634 | 4.4     | .                  | .      | intergenic | 0.241  | .               | 2 |
| AAG.CTT       | 15 | 142016956 | 142016969 | 4.66667 | .                  | .      | intergenic | 0.045  | rs787829493     | 2 |
| AAAC.GTTT     | 15 | 142513121 | 142513139 | 4.75    | ENSSSCT00000017689 | .      | intron     | 0.325  | rs44265 rs7921  | 2 |
| AAAC.GTTT     | 15 | 142513121 | 142513139 | 4.75    | ENSSSCT00000026444 | .      | intron     | 0.325  | rs44265 rs7921  | 2 |
| AAT.ATT       | 15 | 142734438 | 142734452 | 5       | .                  | .      | intergenic | 0.114  | rs789639183     | 2 |
| AAAAG.CTTTT   | 15 | 143073126 | 143073145 | 4       | .                  | .      | intergenic | 0.041  | rs786799239     | 2 |
| AAT.ATT       | 15 | 143088629 | 143088652 | 8       | .                  | .      | intergenic | -0.217 | .               | 2 |
| AG.CT         | 15 | 143179730 | 143179742 | 6.5     | .                  | .      | intergenic | .      | rs788620477     | 2 |
| AAAC.GTTT     | 15 | 143337154 | 143337173 | 5       | ENSSSCT00000017701 | SPHKAP | intron     | 0.005  | rs356261 rs7889 | 2 |
| AAAAC.GTTTT   | 15 | 143687576 | 143687599 | 4.8     | .                  | .      | intergenic | .      | rs789578302     | 3 |
| AT.AT         | 15 | 143899014 | 143899024 | 5.5     | .                  | .      | intergenic | -0.016 | rs793294371     | 2 |
| AAAC.GTTT     | 15 | 144095988 | 144096002 | 3.75    | .                  | .      | intergenic | .      | rs787771843     | 2 |
| AC.GT         | 15 | 144292705 | 144292726 | 11      | .                  | .      | intergenic | 0.054  | .               | 3 |
| AG.CT         | 15 | 144363289 | 144363301 | 6.5     | .                  | .      | intergenic | -0.094 | .               | 2 |
| AAAG.CTTT     | 15 | 144937897 | 144937916 | 5       | ENSSSCT00000017707 | SP140  | intron     | -0.911 | rs349267 rs7892 | 2 |
| AAAAG.CTTTT   | 15 | 145199833 | 145199861 | 5.8     | ENSSSCT00000017712 | .      | intron     | 0.161  | rs789995387     | 2 |
| AAAAG.CTTTT   | 15 | 145213684 | 145213706 | 4.6     | ENSSSCT00000017712 | .      | intron     | -0.046 | rs793132912     | 2 |
| AAC.GTT       | 15 | 145308449 | 145308466 | 6       | .                  | .      | intergenic | .      | rs121120 rs7862 | 2 |
| AC.GT         | 15 | 145383217 | 145383227 | 5.5     | .                  | .      | intergenic | 0.112  | rs791115370     | 2 |
| AT.AT         | 15 | 145427359 | 145427374 | 8       | ENSSSCT00000017717 | SPATA3 | intron     | -0.242 | .               | 3 |
| AAAC.GTTT     | 15 | 145573620 | 145573635 | 4       | ENSSSCT00000017721 | HTR2B  | intron     | 0.284  | rs759871 rs7879 | 2 |
| AAAAAT.ATTTTT | 15 | 145962668 | 145962685 | 3       | .                  | .      | intergenic | 0.185  | rs788583615     | 2 |
| AAAC.GTTT     | 15 | 145966800 | 145966815 | 4       | .                  | .      | intergenic | 0.083  | rs787880291     | 2 |
| AAAAC.GTTTT   | 15 | 145978027 | 145978042 | 3.2     | .                  | .      | intergenic | 0.183  | rs348501 rs7901 | 2 |
| AAAC.GTTT     | 15 | 146079894 | 146079908 | 3.75    | .                  | .      | intergenic | 0.004  | rs790378726     | 2 |
| AAAC.GTTT     | 15 | 146537944 | 146537968 | 6.25    | ENSSSCT00000026575 | DIS3L2 | intron     | 0.047  | rs792711253     | 2 |
| ACAG.CTGT     | 15 | 146556448 | 146556470 | 5.75    | ENSSSCT00000026575 | DIS3L2 | intron     | 0.206  | rs787792615     | 2 |
| AAAC.GTTT     | 15 | 146576038 | 146576058 | 5.25    | ENSSSCT00000026575 | DIS3L2 | intron     | .      | rs202864 rs7889 | 2 |
| AC.GT         | 15 | 146726837 | 146726859 | 11.5    | ENSSSCT00000026675 | .      | intron     | -0.173 | rs275005 rs7863 | 2 |
| AAAT.ATTT     | 15 | 147104600 | 147104622 | 5.75    | ENSSSCT00000017739 | EFHD1  | intron     | -0.211 | rs792894506     | 2 |
| AAAG.CTTT     | 15 | 147664543 | 147664556 | 3.5     | ENSSSCT00000017748 | INPP5D | intron     | .      | rs792433147     | 2 |
| AAC.GTT       | 15 | 148177811 | 148177823 | 4.33333 | ENSSSCT00000017756 | MROH2A | intron     | -0.161 | rs790820110     | 2 |
| AATC.GATT     | 15 | 148181045 | 148181063 | 4.75    | ENSSSCT00000017756 | MROH2A | intron     | -0.179 | rs792760060     | 2 |
| AAAC.GTTT     | 15 | 148850029 | 148850043 | 3.75    | .                  | .      | intergenic | .      | rs304165 rs7920 | 2 |
| AC.GT         | 15 | 149171800 | 149171814 | 7.5     | .                  | .      | intergenic | -0.34  | rs138402 rs7910 | 2 |
| AAAC.GTTT     | 15 | 149395876 | 149395891 | 4       | .                  | .      | intergenic | .      | rs790915493     | 2 |
| AC.GT         | 15 | 149666631 | 149666649 | 9.5     | .                  | .      | intergenic | .      | rs789866181     | 2 |
| AAAC.GTTT     | 15 | 149699379 | 149699400 | 5.5     | .                  | .      | intergenic | -0.246 | rs791094873     | 2 |
| AC.GT         | 15 | 149933352 | 149933363 | 6       | ENSSSCT00000022776 | .      | intron     | -0.115 | rs115502 rs7927 | 2 |
| AC.GT         | 15 | 150362355 | 150362366 | 6       | ENSSSCT00000017770 | AGAP1  | intron     | -0.262 | rs788241131     | 2 |
| AC.GT         | 15 | 150439555 | 150439593 | 19.5    | .                  | .      | intergenic | .      | rs792052557     | 2 |
| ACAG.CTGT     | 15 | 150627874 | 150627895 | 5.5     | .                  | .      | intergenic | 0.037  | rs790020441     | 2 |
| AC.GT         | 15 | 150738952 | 150738963 | 6       | ENSSSCT00000017774 | IQCA1  | intron     | -0.033 | .               | 3 |
| AAC.GTT       | 15 | 150766627 | 150766644 | 6       | .                  | .      | intergenic | -0.343 | rs392006 rs7877 | 2 |
| AAAC.GTTT     | 15 | 150935524 | 150935540 | 4.25    | .                  | .      | intergenic | -0.447 | .               | 3 |
| AAAC.GTTT     | 15 | 151054587 | 151054605 | 4.75    | .                  | .      | intergenic | -0.013 | rs694576010     | 3 |
| AC.GT         | 15 | 151238615 | 151238632 | 9       | .                  | .      | intergenic | -0.063 | rs164749 rs7908 | 2 |
| AG.CT         | 15 | 151252736 | 151252747 | 6       | .                  | .      | intergenic | 0.206  | rs788319938     | 2 |
| AATG.CATT     | 15 | 151446281 | 151446306 | 6.5     | .                  | .      | intergenic | .      | rs792541698     | 2 |
| AAAC.GTTT     | 15 | 151490981 | 151490994 | 3.5     | ENSSSCT00000028799 | COL6A3 | intron     | .      | rs114260 rs7884 | 2 |
| AAAG.CTTT     | 15 | 151557585 | 151557598 | 3.5     | .                  | .      | intergenic | -0.099 | .               | 2 |
| AC.GT         | 15 | 151641080 | 151641091 | 6       | .                  | .      | intergenic | -0.055 | rs789959989     | 3 |
| AC.GT         | 15 | 151680850 | 151680866 | 8.5     | .                  | .      | intergenic | -0.185 | rs788041648     | 2 |
| AAAAC.GTTTT   | 15 | 151700853 | 151700871 | 3.8     | .                  | .      | intergenic | -0.524 | rs787466862     | 2 |
| AAAAC.GTTTT   | 15 | 151765685 | 151765707 | 4.6     | ENSSSCT00000017783 | .      | intron     | .      | rs366741 rs7920 | 2 |
| AAC.GTT       | 15 | 151965568 | 151965587 | 6.66667 | .                  | .      | intergenic | .      | rs787234052     | 2 |
| AAAC.GTTT     | 15 | 151991076 | 151991094 | 4.75    | ENSSSCT00000025350 | .      | intron     | 0.564  | rs163664 rs7927 | 2 |
| AC.GT         | 15 | 152040314 | 152040326 | 6.5     | .                  | .      | intergenic | .      | rs789970529     | 3 |
| AAAC.GTTT     | 15 | 152305388 | 152305406 | 4.75    | .                  | .      | intergenic | 0.054  | rs696463367     | 2 |
| AACAG.CTGT    | 15 | 152576491 | 152576510 | 4       | .                  | .      | intergenic | .      | rs793421777     | 2 |
| AC.GT         | 15 | 153502186 | 153502198 | 6.5     | .                  | .      | intergenic | .      | rs793007606     | 2 |
| AG.CT         | 15 | 153563071 | 153563090 | 10      | .                  | .      | intergenic | -0.333 | rs325811 rs7876 | 5 |
| AT.AT         | 15 | 154289335 | 154289345 | 5.5     | .                  | .      | intergenic | -0.325 | rs323139 rs7920 | 2 |
| AAAT.ATTT     | 15 | 154819785 | 154819801 | 4.25    | .                  | .      | intergenic | .      | .               | 2 |
| AAT.ATT       | 15 | 155885930 | 155885943 | 4.66667 | .                  | .      | intergenic | .      | rs364731 rs7877 | 2 |
| AC.GT         | 15 | 155911454 | 155911465 | 6       | .                  | .      | intergenic | .      | .               | 2 |
| AT.AT         | 15 | 156592062 | 156592072 | 5.5     | .                  | .      | intergenic | .      | rs792152734     | 2 |
| AC.GT         | 15 | 156599466 | 156599475 | 5       | .                  | .      | intergenic | .      | .               | 2 |
| AG.CT         | 15 | 156614421 | 156614435 | 7.5     | .                  | .      | intergenic | -0.242 | rs792550356     | 2 |
| AT.AT         | 15 | 156616544 | 156616553 | 5       | .                  | .      | intergenic | -0.092 | rs791537309     | 2 |
| AAAC.GTTT     | 15 | 156702066 | 156702101 | 9       | .                  | .      | intergenic | .      | rs383084 rs7915 | 2 |
| AC.GT         | 15 | 156816275 | 156816286 | 6       | .                  | .      | intergenic | .      | rs791462845     | 2 |
| AG.CT         | 15 | 157103681 | 157103690 | 5       | .                  | .      | intergenic | .      | .               | 4 |
| AAAAAT.ATTTTT | 15 | 157104262 | 157104285 | 4       | .                  | .      | intergenic | 0.048  | .               | 2 |
| AAAAT.ATTTT   | 15 | 157411913 | 157411930 | 3.6     | ENSSSCT00000017856 | STAM2  | intron     | .      | .               | 3 |
| AAAAC.GTTTT   | 16 | 309158    | 309182    | 5       | ENSSSCT00000018267 | CTNND2 | intron     | -0.193 | rs790276146     | 2 |

|             |    |         |         |         |                    |         |            |        |               |   |
|-------------|----|---------|---------|---------|--------------------|---------|------------|--------|---------------|---|
| AAAAC.GTTTT | 16 | 473932  | 473955  | 4.8     | ENSSSCT00000018267 | CTNND2  | intron     | 0.003  | rs791213137   | 2 |
| AT.AT       | 16 | 521163  | 521174  | 6       | .                  | .       | intergenic | -0.179 | .             | 2 |
| AAT.ATT     | 16 | 536036  | 536049  | 4.66667 | .                  | .       | intergenic | 0.087  | rs789600614   | 3 |
| AC.GT       | 16 | 627113  | 627122  | 5       | .                  | .       | intergenic | -0.385 | .             | 2 |
| AC.GT       | 16 | 640395  | 640407  | 6.5     | .                  | .       | intergenic | -0.166 | 389603 rs7901 | 3 |
| AAC.GTT     | 16 | 655163  | 655177  | 5       | .                  | .       | intergenic | .      | rs786925278   | 2 |
| AC.GT       | 16 | 907214  | 907227  | 7       | .                  | .       | intergenic | -0.21  | rs790935284   | 5 |
| AAAT.ATTT   | 16 | 973076  | 973096  | 5.25    | .                  | .       | intergenic | 0.121  | rs791986786   | 2 |
| ATC.GAT     | 16 | 1017559 | 1017577 | 6.33333 | .                  | .       | intergenic | .      | 511125 rs7916 | 2 |
| AATG.CATT   | 16 | 1025409 | 1025434 | 6.5     | .                  | .       | intergenic | .      | rs787894830   | 2 |
| AAAC.GTTT   | 16 | 1128943 | 1128965 | 5.75    | .                  | .       | intergenic | .      | 528796 rs7905 | 2 |
| AAC.GTT     | 16 | 1142023 | 1142036 | 4.66667 | .                  | .       | intergenic | 0.491  | rs789368904   | 2 |
| AT.AT       | 16 | 1607813 | 1607832 | 10      | .                  | .       | intergenic | .      | .             | 2 |
| AT.AT       | 16 | 1681383 | 1681397 | 7.5     | .                  | .       | intergenic | -0.105 | rs789032240   | 2 |
| AT.AT       | 16 | 1704183 | 1704193 | 5.5     | .                  | .       | intergenic | .      | .             | 4 |
| AAAT.ATTT   | 16 | 2371030 | 2371043 | 3.5     | .                  | .       | intergenic | 0.093  | .             | 2 |
| AAAT.ATTT   | 16 | 2375310 | 2375338 | 7.25    | .                  | .       | intergenic | -0.13  | 727086 rs7888 | 2 |
| AC.GT       | 16 | 2491482 | 2491494 | 6.5     | .                  | .       | intergenic | -0.208 | 316235 rs7922 | 2 |
| AC.GT       | 16 | 2642753 | 2642763 | 5.5     | .                  | .       | intergenic | .      | rs790740427   | 4 |
| AT.AT       | 16 | 2671641 | 2671650 | 5       | .                  | .       | intergenic | -0.16  | .             | 4 |
| AAAC.GTTT   | 16 | 2676988 | 2677007 | 5       | .                  | .       | intergenic | -0.087 | rs792404444   | 2 |
| AAAAC.GTTTT | 16 | 2690869 | 2690884 | 3.2     | .                  | .       | intergenic | 0.116  | rs789481396   | 2 |
| AAAT.ATTT   | 16 | 2717331 | 2717345 | 3.75    | .                  | .       | intergenic | .      | 385466 rs7897 | 2 |
| AAAC.GTTT   | 16 | 2764253 | 2764267 | 3.75    | .                  | .       | intergenic | .      | rs788006491   | 2 |
| AG.CT       | 16 | 2960239 | 2960249 | 5.5     | .                  | .       | intergenic | 0.129  | .             | 2 |
| AC.GT       | 16 | 3117660 | 3117672 | 6.5     | .                  | .       | intergenic | -0.232 | 293736 rs7938 | 2 |
| AC.GT       | 16 | 3228715 | 3228724 | 5       | .                  | .       | intergenic | 0.023  | .             | 2 |
| AC.GT       | 16 | 3281457 | 3281471 | 7.5     | .                  | .       | intergenic | 0.21   | rs789691695   | 3 |
| AG.CT       | 16 | 3285377 | 3285390 | 7       | .                  | .       | intergenic | -0.14  | rs792332638   | 4 |
| AT.AT       | 16 | 3575752 | 3575761 | 5       | .                  | .       | intergenic | 0.425  | .             | 2 |
| ACAG.CTGT   | 16 | 3581051 | 3581074 | 6       | .                  | .       | intergenic | -0.108 | 195240 rs7934 | 2 |
| AC.GT       | 16 | 3840208 | 3840218 | 5.5     | ENSSSCT00000024898 | .       | intron     | 1.004  | rs792841631   | 4 |
| AC.GT       | 16 | 3956502 | 3956528 | 13.5    | ENSSSCT00000024898 | .       | intron     | -0.314 | rs791404009   | 2 |
| ACG.CGT     | 16 | 4250859 | 4250873 | 5       | ENSSSCT00000018268 | .       | intron     | -0.169 | rs787305763   | 2 |
| AC.GT       | 16 | 4346952 | 4346962 | 5.5     | .                  | .       | intergenic | 0.309  | .             | 2 |
| AAAT.ATTT   | 16 | 4382412 | 4382423 | 3       | .                  | .       | intergenic | .      | rs789602007   | 2 |
| AGC.GCT     | 16 | 4419386 | 4419401 | 5.33333 | ENSSSCT00000018270 | FAM105B | intron     | 1.291  | .             | 2 |
| AC.GT       | 16 | 4424116 | 4424135 | 10      | ENSSSCT00000018270 | FAM105B | intron     | -0.174 | rs788760721   | 2 |
| AAAC.GTTT   | 16 | 4572927 | 4572946 | 5       | ENSSSCT00000018271 | ANKH    | intron     | 0.087  | 163330 rs7933 | 2 |
| AG.CT       | 16 | 4637163 | 4637191 | 14.5    | .                  | .       | intergenic | .      | 725772 rs7903 | 2 |
| AT.AT       | 16 | 4651909 | 4651919 | 5.5     | .                  | .       | intergenic | .      | rs792904217   | 2 |
| AAAAC.GTTTT | 16 | 4761147 | 4761168 | 3.66667 | .                  | .       | intergenic | -0.097 | rs789603936   | 2 |
| ATC.GAT     | 16 | 4786171 | 4786199 | 9.66667 | .                  | .       | intergenic | 0.101  | rs793362052   | 2 |
| GAGAT.ATCTC | 16 | 4918486 | 4918505 | 3.33333 | .                  | .       | intergenic | 0.012  | 570792 rs7928 | 2 |
| AAAAT.ATTTT | 16 | 4959088 | 4959114 | 5.4     | .                  | .       | intergenic | 0.123  | rs787866680   | 2 |
| ACAT.ATGT   | 16 | 5096334 | 5096354 | 5.25    | .                  | .       | intergenic | .      | rs789148362   | 2 |
| AT.AT       | 16 | 5174080 | 5174089 | 5       | .                  | .       | intergenic | -0.019 | .             | 2 |
| AAAC.GTTT   | 16 | 5279899 | 5279926 | 7       | .                  | .       | intergenic | 0.047  | rs792878887   | 2 |
| AT.AT       | 16 | 5311119 | 5311131 | 6.5     | .                  | .       | intergenic | 0.431  | 194423 rs7920 | 4 |
| AC.GT       | 16 | 5487186 | 5487196 | 5.5     | .                  | .       | intergenic | -0.246 | .             | 3 |
| AC.GT       | 16 | 5582903 | 5582914 | 6       | ENSSSCT00000025512 | FBXL7   | promoter   | 0.052  | .             | 2 |
| AAC.GTT     | 16 | 5642930 | 5642941 | 4       | .                  | .       | intergenic | 0.641  | 109891 rs7899 | 2 |
| AAC.GTT     | 16 | 5740511 | 5740528 | 6       | .                  | .       | intergenic | .      | 303888 rs7865 | 2 |
| AC.GT       | 16 | 5853796 | 5853818 | 11.5    | .                  | .       | intergenic | 0.042  | 308461 rs7881 | 2 |
| AAG.CTT     | 16 | 5932047 | 5932061 | 5       | .                  | .       | intergenic | -0.108 | rs789484523   | 2 |
| AG.CT       | 16 | 6176524 | 6176540 | 8.5     | ENSSSCT00000018280 | FAM134B | intron     | -0.037 | 177225 rs7921 | 3 |
| AAAG.CTTT   | 16 | 6287099 | 6287113 | 3.75    | ENSSSCT00000018280 | FAM134B | intron     | -0.125 | 376093 rs7896 | 2 |
| AAAC.GTTT   | 16 | 6346092 | 6346111 | 5       | .                  | .       | intergenic | 0.132  | 305284 rs7123 | 2 |
| AAAT.ATTT   | 16 | 6448575 | 6448596 | 5.5     | ENSSSCT00000018282 | MYO10   | intron     | 0.088  | rs703485085   | 2 |
| AT.AT       | 16 | 6453656 | 6453665 | 5       | ENSSSCT00000018282 | MYO10   | intron     | -0.252 | 308113 rs7931 | 2 |
| AAAC.GTTT   | 16 | 6508460 | 6508482 | 5.75    | .                  | .       | intergenic | .      | rs791626591   | 2 |
| AAAAC.GTTTT | 16 | 6526660 | 6526675 | 3.2     | .                  | .       | intergenic | -0.314 | rs792797476   | 2 |
| ACC.GGT     | 16 | 6623494 | 6623512 | 6.33333 | .                  | .       | intergenic | .      | rs791882449   | 2 |
| AG.CT       | 16 | 6644920 | 6644931 | 6       | .                  | .       | intergenic | .      | rs789904231   | 2 |
| AAAT.ATTT   | 16 | 6691592 | 6691619 | 7       | .                  | .       | intergenic | .      | rs791900336   | 3 |
| ACC.GGT     | 16 | 6827287 | 6827306 | 6.66667 | .                  | .       | intergenic | -0.061 | 348379 rs7888 | 3 |
| AAAAC.GTTTT | 16 | 6886409 | 6886430 | 4.4     | .                  | .       | intergenic | -0.2   | rs793178988   | 2 |
| AC.GT       | 16 | 7030195 | 7030212 | 9       | .                  | .       | intergenic | 0.088  | rs787747886   | 3 |
| AAATT.AATTT | 16 | 7099861 | 7099881 | 4.2     | .                  | .       | intergenic | .      | rs793534604   | 2 |
| AG.CT       | 16 | 7194013 | 7194023 | 5.5     | .                  | .       | intergenic | 0.107  | rs792903793   | 3 |
| AAAAC.GTTTT | 16 | 7580806 | 7580830 | 5       | .                  | .       | intergenic | 0.277  | 313087 rs7897 | 2 |
| AAAAG.CTTTT | 16 | 7675239 | 7675263 | 4.16667 | .                  | .       | intergenic | -0.046 | 354083 rs7864 | 2 |
| AC.GT       | 16 | 7713286 | 7713309 | 12      | .                  | .       | intergenic | -0.106 | .             | 2 |
| AT.AT       | 16 | 7716195 | 7716214 | 10      | .                  | .       | intergenic | -0.175 | rs697011415   | 2 |
| AAC.GTT     | 16 | 8057692 | 8057711 | 6.66667 | .                  | .       | intergenic | .      | 721295 rs7899 | 2 |
| AC.GT       | 16 | 8148959 | 8148982 | 12      | .                  | .       | intergenic | 0.245  | rs791690521   | 5 |
| ACAG.CTGT   | 16 | 8230603 | 8230625 | 5.75    | .                  | .       | intergenic | -0.195 | rs789692052   | 2 |
| AAAAC.GTTTT | 16 | 8354460 | 8354489 | 5       | .                  | .       | intergenic | -0.121 | rs791919519   | 2 |
| AG.CT       | 16 | 8429112 | 8429121 | 5       | .                  | .       | intergenic | -0.123 | rs786617499   | 3 |
| AAC.GTT     | 16 | 8431359 | 8431370 | 4       | .                  | .       | intergenic | 0.028  | rs790770439   | 2 |
| AG.CT       | 16 | 8467095 | 8467105 | 5.5     | .                  | .       | intergenic | .      | .             | 3 |
| AC.GT       | 16 | 8598983 | 8598995 | 6.5     | .                  | .       | intergenic | -0.203 | rs788640291   | 2 |
| AAAC.GTTT   | 16 | 8690535 | 8690549 | 3.75    | .                  | .       | intergenic | -0.046 | rs788507743   | 2 |
| AC.GT       | 16 | 8693728 | 8693739 | 6       | .                  | .       | intergenic | 0.03   | .             | 3 |

|             |    |          |          |         |                    |       |            |        |                 |   |
|-------------|----|----------|----------|---------|--------------------|-------|------------|--------|-----------------|---|
| AC.GT       | 16 | 9028466  | 9028476  | 5.5     | .                  | .     | intergenic | -0.326 | .               | 3 |
| AC.GT       | 16 | 9042390  | 9042399  | 5       | .                  | .     | intergenic | -0.123 | .               | 3 |
| ATC.GAT     | 16 | 9077186  | 9077206  | 7       | .                  | .     | intergenic | -0.24  | rs787543657     | 4 |
| AC.GT       | 16 | 9114968  | 9114981  | 7       | .                  | .     | intergenic | .      | rs21395 rs7911  | 2 |
| AAAT.ATTT   | 16 | 9171554  | 9171575  | 5.5     | .                  | .     | intergenic | .      | rs791012944     | 2 |
| AAAC.GTTT   | 16 | 9345692  | 9345706  | 3.75    | .                  | .     | intergenic | .      | rs181233 rs7876 | 2 |
| ACAT.ATGT   | 16 | 9630025  | 9630041  | 4.25    | .                  | .     | intergenic | -0.026 | rs787672581     | 2 |
| AT.AT       | 16 | 9649892  | 9649902  | 5.5     | .                  | .     | intergenic | -0.029 | rs315771 rs7922 | 2 |
| AC.GT       | 16 | 9713002  | 9713014  | 6.5     | .                  | .     | intergenic | .      | rs793286454     | 2 |
| AC.GT       | 16 | 9806498  | 9806510  | 6.5     | .                  | .     | intergenic | 0.033  | .               | 4 |
| AT.AT       | 16 | 9879197  | 9879206  | 5       | .                  | .     | intergenic | .      | rs171269 rs7897 | 2 |
| AAG.CTT     | 16 | 9964461  | 9964474  | 4.66667 | .                  | .     | intergenic | -1.362 | rs793567075     | 2 |
| AAAAT.ATTTT | 16 | 9965769  | 9965788  | 4       | .                  | .     | intergenic | -0.136 | rs572467 rs7866 | 2 |
| AAAT.ATTT   | 16 | 10193803 | 10193817 | 3.75    | .                  | .     | intergenic | 0.062  | rs788168343     | 2 |
| AAAAC.GTTTT | 16 | 10261217 | 10261252 | 6       | .                  | .     | intergenic | -0.084 | rs790717861     | 2 |
| AG.CT       | 16 | 10353184 | 10353212 | 14.5    | .                  | .     | intergenic | -0.098 | .               | 2 |
| AAAC.GTTT   | 16 | 10378230 | 10378257 | 7       | .                  | .     | intergenic | .      | .               | 2 |
| AC.GT       | 16 | 10481635 | 10481648 | 7       | .                  | .     | intergenic | .      | .               | 3 |
| AAAC.GTTT   | 16 | 10485298 | 10485317 | 5       | .                  | .     | intergenic | -0.338 | rs791487507     | 2 |
| AAAC.GTTT   | 16 | 10853196 | 10853210 | 3.75    | ENSSSCT00000018288 | CDH12 | intron     | .      | rs30015 rs7882  | 2 |
| AAC.GTT     | 16 | 10973179 | 10973195 | 5.66667 | .                  | .     | intergenic | -0.002 | rs368614 rs7864 | 2 |
| AAT.ATT     | 16 | 11063148 | 11063176 | 9.66667 | ENSSSCT00000024837 | .     | intron     | -0.101 | rs788477452     | 2 |
| AG.CT       | 16 | 11081529 | 11081539 | 5.5     | ENSSSCT00000024837 | .     | intron     | -0.23  | rs789058157     | 3 |
| AC.GT       | 16 | 11253367 | 11253389 | 11.5    | .                  | .     | intergenic | -0.251 | rs789367670     | 3 |
| AT.AT       | 16 | 11258926 | 11258935 | 5       | .                  | .     | intergenic | .      | rs789794638     | 3 |
| AAT.ATT     | 16 | 11342899 | 11342913 | 5       | .                  | .     | intergenic | -0.133 | rs789735987     | 2 |
| AAAC.GTTT   | 16 | 11359455 | 11359470 | 4       | .                  | .     | intergenic | .      | rs791537725     | 2 |
| AAAC.GTTT   | 16 | 11368974 | 11369009 | 9       | .                  | .     | intergenic | -0.02  | rs790020123     | 2 |
| AC.GT       | 16 | 11585318 | 11585328 | 5.5     | .                  | .     | intergenic | 0.153  | .               | 2 |
| AAAT.ATTT   | 16 | 11684938 | 11684952 | 3.75    | .                  | .     | intergenic | 0.002  | rs121586 rs7879 | 2 |
| AC.GT       | 16 | 11809894 | 11809908 | 7.5     | .                  | .     | intergenic | -0.136 | rs788930911     | 2 |
| AC.GT       | 16 | 11964585 | 11964597 | 6.5     | .                  | .     | intergenic | -0.074 | .               | 3 |
| AAC.GTT     | 16 | 12057667 | 12057681 | 5       | .                  | .     | intergenic | 0.016  | .               | 2 |
| AT.AT       | 16 | 12107893 | 12107906 | 7       | .                  | .     | intergenic | -0.083 | rs699842846     | 3 |
| AC.GT       | 16 | 12321417 | 12321427 | 5.5     | .                  | .     | intergenic | -0.209 | rs692348225     | 3 |
| AG.CT       | 16 | 12384646 | 12384669 | 12      | .                  | .     | intergenic | -0.245 | .               | 2 |
| AT.AT       | 16 | 12478535 | 12478544 | 5       | .                  | .     | intergenic | .      | .               | 2 |
| AT.AT       | 16 | 12497569 | 12497581 | 6.5     | .                  | .     | intergenic | 0.225  | rs695844130     | 2 |
| AAAG.CTTT   | 16 | 12564187 | 12564230 | 11      | .                  | .     | intergenic | -0.346 | rs787476019     | 2 |
| AAAAG.CTTTT | 16 | 12581037 | 12581067 | 6.2     | .                  | .     | intergenic | -0.37  | rs793131971     | 2 |
| ATC.GAT     | 16 | 12619269 | 12619289 | 7       | .                  | .     | intergenic | -0.076 | rs791528234     | 2 |
| AAG.CTT     | 16 | 12639676 | 12639697 | 7.33333 | ENSSSCT00000018292 | CDH10 | intron     | 0.126  | .               | 4 |
| AAAAT.ATTTT | 16 | 12705040 | 12705062 | 4.6     | ENSSSCT00000018292 | CDH10 | intron     | -0.11  | rs793204012     | 2 |
| AT.AT       | 16 | 12793460 | 12793471 | 6       | .                  | .     | intergenic | .      | rs792270042     | 3 |
| AG.CT       | 16 | 12821624 | 12821640 | 8.5     | .                  | .     | intergenic | 0.143  | .               | 4 |
| AATG.CATT   | 16 | 12854739 | 12854758 | 5       | .                  | .     | intergenic | -0.244 | rs792750542     | 2 |
| AC.GT       | 16 | 12909375 | 12909390 | 8       | .                  | .     | intergenic | -0.237 | .               | 2 |
| AC.GT       | 16 | 12925377 | 12925395 | 9.5     | .                  | .     | intergenic | -0.148 | rs350247 rs7872 | 4 |
| AT.AT       | 16 | 12997461 | 12997476 | 8       | .                  | .     | intergenic | .      | rs789800598     | 2 |
| AAAT.ATTT   | 16 | 13106103 | 13106119 | 4.25    | .                  | .     | intergenic | -0.31  | rs787916562     | 2 |
| AAAAC.GTTTT | 16 | 13180022 | 13180049 | 5.6     | .                  | .     | intergenic | .      | rs788616181     | 2 |
| AAT.ATT     | 16 | 13187780 | 13187794 | 5       | .                  | .     | intergenic | -0.142 | rs787031963     | 2 |
| AT.AT       | 16 | 13202075 | 13202089 | 7.5     | .                  | .     | intergenic | -0.056 | rs356217 rs7880 | 3 |
| AG.CT       | 16 | 13380232 | 13380243 | 6       | .                  | .     | intergenic | -0.139 | rs789446738     | 3 |
| AAAAG.CTTTT | 16 | 13383293 | 13383314 | 4.4     | .                  | .     | intergenic | 0.093  | rs786574676     | 2 |
| AAAC.GTTT   | 16 | 13555016 | 13555034 | 4.75    | .                  | .     | intergenic | -0.106 | rs791875481     | 2 |
| AT.AT       | 16 | 13584326 | 13584337 | 6       | .                  | .     | intergenic | 0.046  | rs793392703     | 2 |
| AT.AT       | 16 | 13813393 | 13813402 | 5       | .                  | .     | intergenic | .      | .               | 3 |
| AGAT.ATCT   | 16 | 13861193 | 13861209 | 4.25    | .                  | .     | intergenic | -0.076 | rs793343251     | 3 |
| AAAC.GTTT   | 16 | 13872006 | 13872025 | 5       | .                  | .     | intergenic | -0.047 | rs792305471     | 2 |
| AAAC.GTTT   | 16 | 14056664 | 14056686 | 5.75    | .                  | .     | intergenic | .      | rs18693 rs7931  | 2 |
| AAAC.GTTT   | 16 | 14066128 | 14066142 | 3.75    | .                  | .     | intergenic | 0.05   | .               | 2 |
| ATC.GAT     | 16 | 14174111 | 14174136 | 8.66667 | .                  | .     | intergenic | -0.12  | rs141009 rs7878 | 2 |
| AC.GT       | 16 | 14190426 | 14190440 | 7.5     | .                  | .     | intergenic | -0.185 | rs793546604     | 2 |
| AC.GT       | 16 | 14195327 | 14195356 | 15      | .                  | .     | intergenic | -0.015 | .               | 2 |
| ATC.GAT     | 16 | 14224935 | 14224954 | 6.66667 | .                  | .     | intergenic | 0.04   | rs787987974     | 3 |
| AAT.ATT     | 16 | 14428706 | 14428723 | 6       | .                  | .     | intergenic | -0.061 | .               | 2 |
| AC.GT       | 16 | 14435043 | 14435052 | 5       | .                  | .     | intergenic | -0.001 | rs292502 rs7039 | 2 |
| AAAT.ATTT   | 16 | 14448490 | 14448501 | 3       | .                  | .     | intergenic | .      | rs353455 rs7915 | 2 |
| AAAG.CTTT   | 16 | 14473703 | 14473734 | 8       | .                  | .     | intergenic | 0.108  | rs786792168     | 3 |
| AGAT.ATCT   | 16 | 14586825 | 14586844 | 5       | .                  | .     | intergenic | .      | rs791694655     | 2 |
| AAAC.GTTT   | 16 | 14621908 | 14621928 | 5.25    | .                  | .     | intergenic | 0.125  | .               | 2 |
| AAAT.ATTT   | 16 | 14895181 | 14895202 | 5.5     | ENSSSCT00000028848 | CDH9  | intron     | -0.058 | rs790854445     | 2 |
| AAT.ATT     | 16 | 14923378 | 14923396 | 6.33333 | ENSSSCT00000028848 | CDH9  | intron     | -0.399 | rs792653896     | 2 |
| AT.AT       | 16 | 15050640 | 15050649 | 5       | .                  | .     | intergenic | .      | .               | 2 |
| AG.CT       | 16 | 15160863 | 15160873 | 5.5     | .                  | .     | intergenic | -0.277 | .               | 2 |
| AC.GT       | 16 | 15381544 | 15381559 | 8       | .                  | .     | intergenic | -0.01  | rs788491442     | 2 |
| AAAC.GTTT   | 16 | 15441632 | 15441672 | 10.25   | .                  | .     | intergenic | .      | rs792839439     | 3 |
| AAC.GTT     | 16 | 15585174 | 15585193 | 6.66667 | .                  | .     | intergenic | 0.087  | rs787664091     | 3 |
| AG.CT       | 16 | 15815422 | 15815436 | 7.5     | .                  | .     | intergenic | 0.01   | rs788790178     | 2 |
| AAT.ATT     | 16 | 15867892 | 15867908 | 5.66667 | .                  | .     | intergenic | .      | .               | 3 |
| AC.GT       | 16 | 15902892 | 15902925 | 17      | .                  | .     | intergenic | -0.005 | rs788205687     | 2 |
| AT.AT       | 16 | 16075211 | 16075224 | 7       | .                  | .     | intergenic | .      | rs788220698     | 2 |
| AT.AT       | 16 | 16163378 | 16163389 | 6       | .                  | .     | intergenic | 0.176  | rs786484447     | 3 |

|             |    |          |          |         |                    |         |            |        |               |   |
|-------------|----|----------|----------|---------|--------------------|---------|------------|--------|---------------|---|
| AC.GT       | 16 | 16748535 | 16748545 | 5.5     | .                  | .       | intergenic | .      | rs790562349   | 3 |
| AT.AT       | 16 | 17456640 | 17456651 | 6       | .                  | .       | intergenic | -0.021 | rs790894768   | 2 |
| AAAT.ATTT   | 16 | 17678087 | 17678113 | 6.75    | .                  | .       | intergenic | 0.596  | 308306 rs7929 | 2 |
| AG.CT       | 16 | 17861771 | 17861798 | 14      | .                  | .       | intergenic | .      | rs787061964   | 2 |
| AAAC.GTTT   | 16 | 17878770 | 17878811 | 10.5    | .                  | .       | intergenic | .      | rs792826900   | 2 |
| AT.AT       | 16 | 18027597 | 18027606 | 5       | .                  | .       | intergenic | 0.446  | rs791059323   | 3 |
| AT.AT       | 16 | 18068795 | 18068814 | 10      | .                  | .       | intergenic | 0.117  | .             | 3 |
| AAAC.GTTT   | 16 | 18069066 | 18069079 | 3.5     | .                  | .       | intergenic | 1.177  | .             | 2 |
| AATT.AATT   | 16 | 18144010 | 18144031 | 5.5     | .                  | .       | intergenic | 0.442  | 279657 rs7863 | 2 |
| AC.CT       | 16 | 18166492 | 18166503 | 6       | .                  | .       | intergenic | 0.456  | rs790325528   | 2 |
| AC.GT       | 16 | 18267045 | 18267061 | 8.5     | .                  | .       | intergenic | -0.127 | 198395 rs7917 | 3 |
| AAAC.GTTT   | 16 | 18465271 | 18465289 | 4.75    | ENSSSCT00000018296 | CDH6    | intron     | 0.247  | rs790093154   | 2 |
| AT.AT       | 16 | 18502731 | 18502740 | 5       | .                  | .       | intergenic | 0.244  | rs789561482   | 2 |
| AC.GT       | 16 | 18516696 | 18516705 | 5       | .                  | .       | intergenic | 0.605  | .             | 3 |
| AAT.ATT     | 16 | 18517369 | 18517394 | 8.66667 | .                  | .       | intergenic | .      | 378406 rs7900 | 2 |
| AAACT.AGTTT | 16 | 18603529 | 18603551 | 3.83333 | ENSSSCT00000018300 | DROSHA  | intron     | 0.273  | 731492 rs7892 | 2 |
| AAAC.GTTT   | 16 | 18612083 | 18612114 | 8       | ENSSSCT00000018300 | DROSHA  | intron     | -0.027 | rs793370252   | 2 |
| AAAAC.GTTT  | 16 | 18626426 | 18626449 | 4.8     | ENSSSCT00000018300 | DROSHA  | intron     | 0.448  | 365002 rs7865 | 2 |
| AAAG.CTTT   | 16 | 18629793 | 18629807 | 3.75    | ENSSSCT00000018300 | DROSHA  | intron     | -0.366 | rs691675883   | 2 |
| AC.GT       | 16 | 18821598 | 18821617 | 10      | .                  | .       | intergenic | 0.246  | 157614 rs7900 | 3 |
| AAAAT.ATTTT | 16 | 18838325 | 18838339 | 3       | .                  | .       | intergenic | 0.468  | rs787727109   | 2 |
| AC.GT       | 16 | 18897410 | 18897433 | 12      | ENSSSCT00000036642 | PDZD2   | promoter   | -0.043 | .             | 4 |
| AGG.CCT     | 16 | 18950686 | 18950698 | 4.33333 | ENSSSCT00000036642 | PDZD2   | intron     | -0.039 | 379384 rs7928 | 2 |
| AAAC.GTTT   | 16 | 19614629 | 19614652 | 6       | .                  | .       | intergenic | 0.178  | 372374 rs7932 | 2 |
| AG.CT       | 16 | 19636178 | 19636187 | 5       | .                  | .       | intergenic | -0.088 | rs791181243   | 3 |
| AAAAT.ATTTT | 16 | 19660644 | 19660665 | 4.4     | .                  | .       | intergenic | -0.037 | 145122 rs7927 | 2 |
| AG.CT       | 16 | 19686652 | 19686665 | 7       | .                  | .       | intergenic | .      | rs707813158   | 3 |
| AT.AT       | 16 | 19780837 | 19780854 | 9       | .                  | .       | intergenic | 0.443  | rs787883173   | 2 |
| AC.GT       | 16 | 19859545 | 19859562 | 9       | .                  | .       | intergenic | .      | rs789737210   | 2 |
| AAAC.GTTT   | 16 | 19920601 | 19920619 | 4.75    | .                  | .       | intergenic | 0.13   | rs793464995   | 2 |
| AC.GT       | 16 | 20014551 | 20014564 | 7       | .                  | .       | intergenic | 0.135  | 350242 rs7912 | 2 |
| AAAT.ATTT   | 16 | 20704677 | 20704691 | 3.75    | .                  | .       | intergenic | -0.016 | .             | 2 |
| AAAC.GTTT   | 16 | 20804414 | 20804434 | 5.25    | ENSSSCT00000018316 | C1QTNF3 | intron     | .      | 309609 rs7889 | 3 |
| AAAC.GTTT   | 16 | 21084663 | 21084676 | 3.5     | .                  | .       | intergenic | 0.155  | rs788469333   | 2 |
| AC.GT       | 16 | 21111919 | 21111939 | 10.5    | ENSSSCT00000018317 | RAI14   | intron     | 0.091  | .             | 3 |
| AAAAC.GTTT  | 16 | 21211220 | 21211234 | 3       | ENSSSCT00000018317 | RAI14   | intron     | 0.328  | rs789219534   | 2 |
| AAGG.CCTT   | 16 | 21513251 | 21513264 | 3.5     | ENSSSCT00000018324 | AGXT2   | intron     | 0.185  | rs789166224   | 2 |
| AAC.GTT     | 16 | 21877935 | 21877948 | 4.66667 | .                  | .       | intergenic | .      | 328267 rs7872 | 2 |
| AAAAC.GTTT  | 16 | 21985263 | 21985283 | 3.5     | .                  | .       | intergenic | 0.018  | rs793584891   | 2 |
| ATC.GAT     | 16 | 22237873 | 22237894 | 7.33333 | ENSSSCT00000018326 | SPEF2   | intron     | 0.969  | rs790589017   | 2 |
| AAAC.GTTT   | 16 | 23150409 | 23150423 | 3.75    | .                  | .       | intergenic | -0.164 | rs793428185   | 2 |
| AAAT.ATTT   | 16 | 23225572 | 23225591 | 5       | .                  | .       | intergenic | .      | rs792799745   | 2 |
| AT.AT       | 16 | 23579597 | 23579606 | 5       | ENSSSCT00000018340 | C5orf42 | intron     | -0.001 | 141177 rs7869 | 2 |
| AAC.GTT     | 16 | 23871211 | 23871227 | 5.66667 | ENSSSCT00000018344 | WDR70   | intron     | .      | rs790453810   | 2 |
| ACAT.ATGT   | 16 | 23908694 | 23908709 | 4       | ENSSSCT00000018344 | WDR70   | intron     | .      | .             | 2 |
| AT.AT       | 16 | 23942337 | 23942352 | 8       | ENSSSCT00000018344 | WDR70   | intron     | 1.291  | .             | 2 |
| AGGG.CCCT   | 16 | 23976009 | 23976025 | 4.25    | ENSSSCT00000018344 | WDR70   | intron     | 0.054  | 192236 rs7906 | 2 |
| AAAC.GTTT   | 16 | 24317674 | 24317692 | 4.75    | .                  | .       | intergenic | 0.124  | rs792130954   | 2 |
| AAAAC.GTTT  | 16 | 24331156 | 24331174 | 3.8     | .                  | .       | intergenic | .      | 709307 rs7872 | 2 |
| AG.CT       | 16 | 24495957 | 24495966 | 5       | .                  | .       | intergenic | 0.22   | 311272 rs7904 | 2 |
| AT.AT       | 16 | 24496412 | 24496424 | 6.5     | .                  | .       | intergenic | .      | rs788035572   | 2 |
| AAATT.AATTT | 16 | 24500647 | 24500663 | 3.4     | .                  | .       | intergenic | 0.048  | rs788695615   | 2 |
| AAT.ATT     | 16 | 24529872 | 24529893 | 7.33333 | .                  | .       | intergenic | 0.211  | 333528 rs7908 | 2 |
| AC.GT       | 16 | 24766881 | 24766892 | 6       | ENSSSCT00000018347 | EGFLAM  | intron     | .      | .             | 2 |
| AC.GT       | 16 | 24766881 | 24766892 | 6       | ENSSSCT00000025413 | EGFLAM  | intron     | .      | .             | 2 |
| AG.CT       | 16 | 24820375 | 24820384 | 5       | ENSSSCT00000018347 | EGFLAM  | intron     | 0.154  | rs789135926   | 2 |
| AG.CT       | 16 | 24820375 | 24820384 | 5       | ENSSSCT00000025413 | EGFLAM  | intron     | 0.154  | rs789135926   | 2 |
| AAAC.GTTT   | 16 | 24995854 | 24995868 | 3.75    | ENSSSCT00000018350 | LIFR    | intron     | 0.181  | rs792126472   | 2 |
| AAAC.GTTT   | 16 | 24995854 | 24995868 | 3.75    | ENSSSCT00000032662 | LIFR    | intron     | 0.181  | rs792126472   | 2 |
| AG.CT       | 16 | 25025063 | 25025079 | 8.5     | .                  | .       | intergenic | -0.007 | .             | 2 |
| AC.GT       | 16 | 25053067 | 25053077 | 5.5     | .                  | .       | intergenic | 0.155  | rs786916581   | 2 |
| AAGG.CCTT   | 16 | 25120983 | 25121024 | 10.5    | .                  | .       | intergenic | .      | rs789541391   | 4 |
| AAAAC.GTTT  | 16 | 25152658 | 25152673 | 3.2     | .                  | .       | intergenic | 0.5    | rs793590188   | 2 |
| AAAAG.CTTT  | 16 | 25213314 | 25213331 | 3       | .                  | .       | intergenic | 0.174  | rs789875026   | 2 |
| AAAG.CTTT   | 16 | 25235646 | 25235660 | 3.75    | .                  | .       | intergenic | .      | rs789565836   | 2 |
| AAAAT.ATTTT | 16 | 25536710 | 25536727 | 3.6     | ENSSSCT00000035208 | FYB     | intron     | 0.109  | rs787475423   | 2 |
| AAAAT.ATTTT | 16 | 25536710 | 25536727 | 3.6     | ENSSSCT00000034777 | FYB     | intron     | 0.109  | rs787475423   | 2 |
| AAAAT.ATTTT | 16 | 25536710 | 25536727 | 3.6     | ENSSSCT00000018355 | FYB     | intron     | 0.109  | rs787475423   | 2 |
| ACC.GGT     | 16 | 25574391 | 25574404 | 4.66667 | ENSSSCT00000035208 | FYB     | intron     | 0.046  | rs789457418   | 2 |
| ACC.GGT     | 16 | 25574391 | 25574404 | 4.66667 | ENSSSCT00000034777 | FYB     | intron     | 0.046  | rs789457418   | 2 |
| ACC.GGT     | 16 | 25574391 | 25574404 | 4.66667 | ENSSSCT00000018355 | FYB     | intron     | 0.046  | rs789457418   | 2 |
| AAAAC.GTTT  | 16 | 25715388 | 25715420 | 5.5     | .                  | .       | intergenic | -0.113 | rs793488902   | 2 |
| AAAT.ATTT   | 16 | 25806647 | 25806660 | 3.5     | ENSSSCT00000018358 | DAB2    | intron     | -0.008 | rs787833475   | 2 |
| AAAT.ATTT   | 16 | 25806647 | 25806660 | 3.5     | ENSSSCT00000018356 | C9      | intron     | -0.008 | rs787833475   | 2 |
| AAT.ATT     | 16 | 26238611 | 26238624 | 4.66667 | .                  | .       | intergenic | .      | rs790022787   | 2 |
| AT.AT       | 16 | 26252325 | 26252336 | 6       | .                  | .       | intergenic | 0.106  | rs790060954   | 3 |
| AG.CT       | 16 | 26352599 | 26352615 | 8.5     | .                  | .       | intergenic | -0.034 | rs791441226   | 2 |
| AAC.GTT     | 16 | 26367838 | 26367854 | 5.66667 | .                  | .       | intergenic | -0.136 | rs793205168   | 2 |
| AG.CT       | 16 | 26443759 | 26443771 | 6.5     | .                  | .       | intergenic | .      | rs789532540   | 4 |
| AC.GT       | 16 | 26445577 | 26445599 | 11.5    | .                  | .       | intergenic | .      | rs788774087   | 3 |
| AT.AT       | 16 | 26445988 | 26446005 | 9       | .                  | .       | intergenic | .      | rs793053962   | 2 |
| AAGAG.CTCTT | 16 | 26678259 | 26678302 | 7.33333 | .                  | .       | intergenic | .      | 335676 rs7926 | 2 |
| AAAC.GTTT   | 16 | 26788633 | 26788668 | 9       | .                  | .       | intergenic | 0.283  | rs790804961   | 2 |
| AC.GT       | 16 | 26849811 | 26849822 | 6       | .                  | .       | intergenic | 0.231  | .             | 5 |

|             |    |          |          |         |                    |        |            |        |               |   |
|-------------|----|----------|----------|---------|--------------------|--------|------------|--------|---------------|---|
| AAAT.ATTT   | 16 | 26859213 | 26859232 | 5       | ENSSSCT00000030818 | .      | intron     | .      | rs791637780   | 2 |
| AAAT.ATTT   | 16 | 26888977 | 26889002 | 6.5     | .                  | .      | intergenic | .      | 337112 rs7876 | 2 |
| AG.CT       | 16 | 27033399 | 27033408 | 5       | ENSSSCT00000023181 | MROH2B | intron     | 0.021  | rs790070622   | 2 |
| AT.AT       | 16 | 27035767 | 27035778 | 6       | ENSSSCT00000023181 | MROH2B | intron     | -0.229 | .             | 3 |
| AAAC.GTTT   | 16 | 27138131 | 27138153 | 5.75    | ENSSSCT00000018362 | .      | intron     | -0.196 | 798224 rs7884 | 2 |
| AAAC.GTTT   | 16 | 27228777 | 27228797 | 5.25    | ENSSSCT00000018364 | C6     | intron     | 0.029  | rs788644770   | 2 |
| AT.AT       | 16 | 27230782 | 27230792 | 5.5     | ENSSSCT00000018364 | C6     | intron     | -0.097 | rs791565635   | 2 |
| AC.GT       | 16 | 27250252 | 27250264 | 6.5     | ENSSSCT00000018364 | C6     | intron     | -0.022 | .             | 4 |
| AAAAT.ATTTT | 16 | 27558048 | 27558067 | 4       | .                  | .      | intergenic | .      | rs706610362   | 2 |
| AG.CT       | 16 | 28242644 | 28242654 | 5.5     | .                  | .      | intergenic | .      | .             | 3 |
| AAAC.GTTT   | 16 | 28338782 | 28338799 | 4.5     | .                  | .      | intergenic | 0.022  | 360701 rs7896 | 3 |
| AC.GT       | 16 | 28548458 | 28548470 | 6.5     | .                  | .      | intergenic | -0.147 | .             | 2 |
| AAAT.ATTT   | 16 | 28571813 | 28571829 | 4.25    | .                  | .      | intergenic | .      | rs793029235   | 2 |
| AAT.ATT     | 16 | 28759127 | 28759153 | 9       | ENSSSCT00000018369 | GHR    | intron     | 0.079  | .             | 2 |
| AG.CT       | 16 | 29099330 | 29099344 | 7.5     | .                  | .      | intergenic | 0.134  | rs793633251   | 3 |
| AG.CT       | 16 | 29333050 | 29333059 | 5       | ENSSSCT00000018373 | .      | promoter   | 0.081  | rs791278182   | 3 |
| AAAC.GTTT   | 16 | 29341318 | 29341336 | 4.75    | .                  | .      | intergenic | -0.368 | rs788706179   | 2 |
| AAAT.ATTT   | 16 | 29451833 | 29451852 | 5       | ENSSSCT00000018376 | HMGCS1 | 3'utr      | 1.139  | 702505 rs7935 | 2 |
| AAAAC.GTTTT | 16 | 29504440 | 29504479 | 8       | ENSSSCT00000018377 | NIM1K  | intron     | 0.177  | 323677 rs7102 | 2 |
| AT.AT       | 16 | 29600337 | 29600347 | 5.5     | ENSSSCT00000018378 | PAIP1  | intron     | 1.272  | 312238 rs7936 | 2 |
| AC.GT       | 16 | 30210703 | 30210713 | 5.5     | .                  | .      | intergenic | 0.262  | .             | 3 |
| AAAC.GTTT   | 16 | 30228517 | 30228529 | 3.25    | .                  | .      | intergenic | 0.034  | 775002 rs7862 | 2 |
| AC.GT       | 16 | 30311679 | 30311689 | 5.5     | ENSSSCT00000018382 | FGF10  | intron     | 0.789  | .             | 3 |
| AAAC.GTTT   | 16 | 30435135 | 30435149 | 3.75    | .                  | .      | intergenic | 0.106  | rs790430303   | 2 |
| AAAC.GTTT   | 16 | 30437276 | 30437301 | 6.5     | .                  | .      | intergenic | 0.198  | .             | 3 |
| AT.AT       | 16 | 30806863 | 30806873 | 5.5     | .                  | .      | intergenic | .      | rs792731234   | 2 |
| AAAT.ATTT   | 16 | 30918190 | 30918216 | 6.75    | .                  | .      | intergenic | 0.023  | 358818 rs7887 | 2 |
| AAT.ATT     | 16 | 30945206 | 30945226 | 7       | .                  | .      | intergenic | .      | 777361 rs7907 | 2 |
| AC.GT       | 16 | 30964932 | 30964954 | 11.5    | ENSSSCT00000028722 | HCN1   | intron     | 0.167  | .             | 2 |
| AC.GT       | 16 | 30975055 | 30975078 | 12      | ENSSSCT00000028722 | HCN1   | intron     | 0.316  | rs792855461   | 3 |
| AAC.GTT     | 16 | 31083739 | 31083756 | 6       | ENSSSCT00000028722 | HCN1   | intron     | -0.191 | .             | 2 |
| AG.CT       | 16 | 31105392 | 31105403 | 6       | ENSSSCT00000028722 | HCN1   | intron     | 0.068  | .             | 3 |
| AT.AT       | 16 | 31129438 | 31129452 | 7.5     | ENSSSCT00000028722 | HCN1   | intron     | 0.124  | 769755 rs7915 | 2 |
| AAAT.ATTT   | 16 | 31228083 | 31228106 | 6       | ENSSSCT00000028722 | HCN1   | intron     | 0.139  | rs788651400   | 2 |
| AAAC.GTTT   | 16 | 31354939 | 31354950 | 3       | .                  | .      | intergenic | .      | rs786327758   | 2 |
| AG.CT       | 16 | 31365002 | 31365015 | 7       | .                  | .      | intergenic | -0.12  | rs791691776   | 2 |
| AG.CT       | 16 | 31389903 | 31389914 | 6       | .                  | .      | intergenic | 0.642  | .             | 2 |
| AACC.GGTT   | 16 | 31597888 | 31597913 | 6.5     | .                  | .      | intergenic | .      | .             | 2 |
| AAAC.GTTT   | 16 | 31651389 | 31651408 | 5       | .                  | .      | intergenic | -0.375 | 134160 rs7890 | 2 |
| AG.CT       | 16 | 32088067 | 32088083 | 8.5     | .                  | .      | intergenic | -0.084 | .             | 2 |
| AC.GT       | 16 | 32098297 | 32098308 | 6       | .                  | .      | intergenic | 0.111  | rs788111302   | 2 |
| AG.CT       | 16 | 32140209 | 32140223 | 7.5     | .                  | .      | intergenic | -0.137 | rs792735470   | 2 |
| AAAC.GTTT   | 16 | 32157384 | 32157403 | 5       | .                  | .      | intergenic | 0.063  | 227689 rs7933 | 2 |
| AGAT.ATCT   | 16 | 32158737 | 32158764 | 7       | .                  | .      | intergenic | -0.08  | rs788724500   | 2 |
| AT.AT       | 16 | 32421481 | 32421499 | 9.5     | .                  | .      | intergenic | .      | 757964 rs7908 | 2 |
| AT.AT       | 16 | 32432158 | 32432169 | 6       | .                  | .      | intergenic | .      | rs695560861   | 3 |
| AT.AT       | 16 | 32436354 | 32436365 | 6       | .                  | .      | intergenic | -0.039 | .             | 3 |
| AAAG.CTTT   | 16 | 32439502 | 32439516 | 3.75    | .                  | .      | intergenic | 0.124  | 332079 rs7896 | 2 |
| AC.GT       | 16 | 32542631 | 32542651 | 10.5    | .                  | .      | intergenic | 0.151  | rs792394207   | 3 |
| AC.GT       | 16 | 32632649 | 32632658 | 5       | .                  | .      | intergenic | 0.312  | .             | 3 |
| AC.GT       | 16 | 32652228 | 32652239 | 6       | .                  | .      | intergenic | -0.04  | .             | 2 |
| AC.GT       | 16 | 32678565 | 32678577 | 6.5     | .                  | .      | intergenic | -0.29  | rs792770393   | 2 |
| AG.CT       | 16 | 32705012 | 32705025 | 7       | .                  | .      | intergenic | -0.025 | 352236 rs7893 | 3 |
| AAAC.GTTT   | 16 | 32763489 | 32763515 | 6.75    | .                  | .      | intergenic | .      | 260079 rs7906 | 2 |
| AAAAG.CTTTT | 16 | 32996006 | 32996020 | 3       | .                  | .      | intergenic | -0.017 | rs786854793   | 2 |
| AAAAC.GTTTT | 16 | 33207893 | 33207909 | 3.4     | .                  | .      | intergenic | -0.094 | rs786905410   | 2 |
| ATC.GAT     | 16 | 33307300 | 33307331 | 10.6667 | .                  | .      | intergenic | -0.29  | rs710280074   | 3 |
| AAAAG.CTTTT | 16 | 33322649 | 33322675 | 5.4     | .                  | .      | intergenic | -0.042 | 151070 rs7901 | 2 |
| AC.GT       | 16 | 33411651 | 33411665 | 7.5     | .                  | .      | intergenic | 0.083  | rs693440515   | 4 |
| AAAT.ATTT   | 16 | 33661089 | 33661102 | 3.5     | .                  | .      | intergenic | .      | rs790725255   | 2 |
| AT.AT       | 16 | 33662799 | 33662809 | 5.5     | .                  | .      | intergenic | -0.139 | rs788129476   | 2 |
| AC.GT       | 16 | 33768908 | 33768929 | 11      | .                  | .      | intergenic | 0.02   | rs789878802   | 3 |
| AC.GT       | 16 | 33779370 | 33779384 | 7.5     | .                  | .      | intergenic | .      | .             | 2 |
| AGAT.ATCT   | 16 | 33903670 | 33903686 | 4.25    | .                  | .      | intergenic | 0.227  | rs787961021   | 2 |
| AAGG.CCTT   | 16 | 34023827 | 34023852 | 6.5     | ENSSSCT00000018389 | ITGA1  | intron     | 0.183  | 330618 rs7905 | 2 |
| AAGG.CCTT   | 16 | 34023827 | 34023852 | 6.5     | ENSSSCT00000034458 | ITGA1  | intron     | 0.183  | 330618 rs7905 | 2 |
| ACT.AGT     | 16 | 34112120 | 34112140 | 7       | ENSSSCT00000018389 | ITGA1  | intron     | 0.243  | rs792793965   | 2 |
| ACT.AGT     | 16 | 34112120 | 34112140 | 7       | ENSSSCT00000033593 | ITGA1  | intron     | 0.243  | rs792793965   | 2 |
| AAC.GTT     | 16 | 34152255 | 34152266 | 4       | .                  | .      | intergenic | .      | 349487 rs7911 | 2 |
| AC.GT       | 16 | 34197222 | 34197235 | 7       | ENSSSCT00000032891 | ITGA2  | intron     | 0.143  | .             | 3 |
| AC.GT       | 16 | 34197222 | 34197235 | 7       | ENSSSCT00000035637 | ITGA2  | intron     | 0.143  | .             | 3 |
| AC.GT       | 16 | 34197222 | 34197235 | 7       | ENSSSCT00000034283 | ITGA2  | intron     | 0.143  | .             | 3 |
| AC.GT       | 16 | 34197222 | 34197235 | 7       | ENSSSCT00000018391 | ITGA2  | intron     | 0.143  | .             | 3 |
| AC.GT       | 16 | 34197222 | 34197235 | 7       | ENSSSCT00000032880 | ITGA2  | intron     | 0.143  | .             | 3 |
| AT.AT       | 16 | 34269848 | 34269860 | 6.5     | ENSSSCT00000018392 | MOCS2  | 3'utr      | .      | rs791924036   | 3 |
| AAAAC.GTTTT | 16 | 34476738 | 34476760 | 4.6     | .                  | .      | intergenic | -0.059 | rs790230002   | 2 |
| AG.CT       | 16 | 34493730 | 34493740 | 5.5     | .                  | .      | intergenic | .      | .             | 2 |
| AT.AT       | 16 | 34675497 | 34675521 | 12.5    | .                  | .      | intergenic | .      | rs786429988   | 2 |
| AC.GT       | 16 | 34878262 | 34878283 | 11      | ENSSSCT00000022508 | .      | intron     | .      | rs791833184   | 2 |
| AAAT.ATTT   | 16 | 34907246 | 34907273 | 7       | .                  | .      | intergenic | 0.271  | 359899 rs7901 | 2 |
| AAAT.ATTT   | 16 | 34931032 | 34931046 | 3.75    | .                  | .      | intergenic | .      | .             | 2 |
| AAAC.GTTT   | 16 | 35016657 | 35016679 | 5.75    | .                  | .      | intergenic | .      | rs786642917   | 2 |
| AAAT.ATTT   | 16 | 35022842 | 35022861 | 5       | .                  | .      | intergenic | .      | rs789688739   | 2 |
| AC.GT       | 16 | 35315651 | 35315663 | 6.5     | ENSSSCT00000018399 | ARL15  | intron     | -0.079 | .             | 3 |

|              |    |          |          |         |                    |         |            |        |               |   |
|--------------|----|----------|----------|---------|--------------------|---------|------------|--------|---------------|---|
| AAG.CTT      | 16 | 35382833 | 35382844 | 4       | ENSSSCT00000018399 | ARL15   | intron     | .      | rs789556478   | 2 |
| AG.CT        | 16 | 35915730 | 35915750 | 10.5    | .                  | .       | intergenic | 0.02   | rs791749427   | 2 |
| AAAC.GTTT    | 16 | 36123484 | 36123502 | 4.75    | .                  | .       | intergenic | 0      | rs789688246   | 2 |
| AAAT.ATTT    | 16 | 36206763 | 36206785 | 5.75    | .                  | .       | intergenic | .      | rs789736979   | 2 |
| AAAC.GTTT    | 16 | 36270203 | 36270239 | 9.25    | .                  | .       | intergenic | 0.052  | rs793420355   | 2 |
| AGG.CCT      | 16 | 36316766 | 36316798 | 11      | .                  | .       | intergenic | -0.024 | 370940 rs7923 | 2 |
| AGGC.GCCT    | 16 | 36318579 | 36318596 | 4.5     | .                  | .       | intergenic | 0.602  | rs787936554   | 2 |
| AT.AT        | 16 | 36726073 | 36726084 | 6       | ENSSSCT00000018418 | PPAP2A  | intron     | 0.091  | 398878 rs7897 | 2 |
| AAAAAC.GTTTT | 16 | 37197569 | 37197594 | 4.33333 | .                  | .       | intergenic | 0.108  | 745519 rs7927 | 2 |
| AC.GT        | 16 | 37432742 | 37432756 | 7.5     | .                  | .       | intergenic | 0.197  | rs793226919   | 2 |
| AAAC.GTTT    | 16 | 37563651 | 37563674 | 6       | ENSSSCT00000018421 | IL31RA  | intron     | -0.119 | 722277 rs7889 | 2 |
| AAAC.GTTT    | 16 | 37607016 | 37607034 | 4.75    | ENSSSCT00000018421 | IL31RA  | intron     | -0.016 | rs787361628   | 2 |
| AAAT.ATTT    | 16 | 37681305 | 37681320 | 4       | .                  | .       | intergenic | .      | 340741 rs7914 | 2 |
| AAAAC.GTTTT  | 16 | 37681581 | 37681601 | 4.2     | .                  | .       | intergenic | .      | .             | 2 |
| AAAC.GTTT    | 16 | 37789562 | 37789577 | 4       | ENSSSCT00000020475 | U6      | promoter   | .      | 749275 rs7900 | 2 |
| AGG.CCT      | 16 | 37911927 | 37911943 | 5.66667 | .                  | .       | intergenic | .      | rs789178893   | 2 |
| AAAC.GTTT    | 16 | 38007221 | 38007234 | 3.5     | .                  | .       | intergenic | 0.103  | rs786312620   | 2 |
| AAAC.GTTT    | 16 | 38047317 | 38047331 | 3.75    | .                  | .       | intergenic | .      | rs697025129   | 2 |
| AAC.GTT      | 16 | 38181710 | 38181726 | 5.66667 | ENSSSCT00000018424 | MAP3K1  | intron     | 0.222  | .             | 3 |
| AAC.GTT      | 16 | 38185206 | 38185229 | 8       | ENSSSCT00000018424 | MAP3K1  | intron     | 1.659  | 795942 rs7933 | 2 |
| AAAAC.GTTTT  | 16 | 38230417 | 38230440 | 4.8     | .                  | .       | intergenic | .      | rs787308020   | 2 |
| AC.GT        | 16 | 38285858 | 38285873 | 8       | ENSSSCT00000018427 | MIER3   | intron     | 0.417  | 354626 rs7871 | 3 |
| AACT.AGTT    | 16 | 38403591 | 38403608 | 4.5     | .                  | .       | intergenic | -0.157 | rs788635949   | 2 |
| AC.GT        | 16 | 38445891 | 38445901 | 5.5     | .                  | .       | intergenic | .      | rs793376879   | 2 |
| AG.CT        | 16 | 38463684 | 38463693 | 5       | .                  | .       | intergenic | 0.134  | rs788830227   | 2 |
| AAT.ATT      | 16 | 38755356 | 38755378 | 7.66667 | .                  | .       | intergenic | 0.187  | 349547 rs7901 | 2 |
| AG.CT        | 16 | 38975037 | 38975046 | 5       | .                  | .       | intergenic | .      | rs788710500   | 2 |
| AAC.GTT      | 16 | 38999929 | 38999944 | 5.33333 | .                  | .       | intergenic | .      | .             | 2 |
| AG.CT        | 16 | 39017580 | 39017592 | 6.5     | .                  | .       | intergenic | 0.157  | .             | 2 |
| AAATT.AATTT  | 16 | 39201745 | 39201763 | 3.8     | .                  | .       | intergenic | .      | 516544 rs7937 | 2 |
| AAAAC.GTTTT  | 16 | 39761818 | 39761837 | 4       | .                  | .       | intergenic | 0.17   | rs793352532   | 2 |
| AC.GT        | 16 | 39811567 | 39811579 | 6.5     | .                  | .       | intergenic | 0.023  | 306967 rs7934 | 2 |
| AT.AT        | 16 | 40010242 | 40010251 | 5       | .                  | .       | intergenic | 0.089  | rs789778091   | 2 |
| AAAT.ATTT    | 16 | 40094741 | 40094763 | 5.75    | .                  | .       | intergenic | .      | rs789102943   | 2 |
| ACC.GGT      | 16 | 40171625 | 40171645 | 7       | ENSSSCT00000018434 | .       | promoter   | .      | 114301 rs7904 | 2 |
| AC.GT        | 16 | 40318757 | 40318769 | 6.5     | ENSSSCT00000018435 | RAB3C   | intron     | 0.066  | rs790452408   | 2 |
| AGAT.ATCT    | 16 | 40402632 | 40402651 | 5       | ENSSSCT00000018435 | RAB3C   | intron     | -0.048 | 325220 rs7908 | 2 |
| AAAC.GTTT    | 16 | 40456442 | 40456464 | 5.75    | ENSSSCT00000018435 | RAB3C   | intron     | .      | 546163 rs7868 | 3 |
| AC.GT        | 16 | 40596832 | 40596842 | 5.5     | .                  | .       | intergenic | 0.087  | rs788893488   | 2 |
| AG.CT        | 16 | 40639099 | 40639133 | 17.5    | ENSSSCT00000018436 | PDE4D   | 3'utr      | 1.597  | rs789767444   | 2 |
| AT.AT        | 16 | 40956133 | 40956142 | 5       | ENSSSCT00000029920 | .       | intron     | .      | rs791369265   | 2 |
| AAAC.GTTT    | 16 | 40984210 | 40984232 | 5.75    | .                  | .       | intergenic | 0.002  | rs787186622   | 2 |
| ACAT.ATGT    | 16 | 40992875 | 40992893 | 4.75    | .                  | .       | intergenic | -0.084 | .             | 5 |
| AAAAC.GTTTT  | 16 | 41023670 | 41023698 | 5.8     | .                  | .       | intergenic | .      | 255236 rs7933 | 2 |
| AC.GT        | 16 | 41084018 | 41084028 | 5.5     | .                  | .       | intergenic | -0.127 | rs789335980   | 2 |
| ACAT.ATGT    | 16 | 41984597 | 41984615 | 4.75    | .                  | .       | intergenic | .      | .             | 3 |
| AAAT.ATTT    | 16 | 42119389 | 42119412 | 6       | .                  | .       | intergenic | .      | 223252 rs7902 | 2 |
| AAAC.GTTT    | 16 | 42120343 | 42120365 | 5.75    | .                  | .       | intergenic | .      | rs793146268   | 3 |
| AAAT.ATTT    | 16 | 42223443 | 42223456 | 3.5     | .                  | .       | intergenic | 0.018  | .             | 2 |
| AAAT.ATTT    | 16 | 42261897 | 42261914 | 4.5     | .                  | .       | intergenic | -0.111 | rs787201452   | 2 |
| AAAC.GTTT    | 16 | 42480627 | 42480646 | 5       | .                  | .       | intergenic | 0.092  | 261775 rs7867 | 2 |
| AAC.GTT      | 16 | 42538958 | 42538974 | 5.66667 | ENSSSCT00000018441 | ELOVL7  | intron     | 0.241  | 264539 rs7910 | 2 |
| AAC.GTT      | 16 | 42538958 | 42538974 | 5.66667 | ENSSSCT00000018440 | ELOVL7  | intron     | 0.241  | 264539 rs7910 | 2 |
| AAAG.CTTT    | 16 | 42618079 | 42618113 | 8.75    | ENSSSCT00000018442 | ERCC8   | intron     | .      | .             | 2 |
| AAAAT.ATTTT  | 16 | 42871390 | 42871417 | 5.6     | ENSSSCT00000025662 | NDUFAF2 | intron     | .      | rs788783623   | 2 |
| AT.AT        | 16 | 43104787 | 43104797 | 5.5     | .                  | .       | intergenic | 0.384  | .             | 3 |
| AC.GT        | 16 | 43317840 | 43317852 | 6.5     | .                  | .       | intergenic | .      | rs789457391   | 2 |
| AC.GT        | 16 | 43356573 | 43356588 | 8       | .                  | .       | intergenic | -0.033 | rs792409759   | 3 |
| AC.GT        | 16 | 43384484 | 43384494 | 5.5     | .                  | .       | intergenic | .      | rs787369148   | 2 |
| AAC.GTT      | 16 | 43480494 | 43480518 | 8.33333 | .                  | .       | intergenic | 0.166  | rs789928851   | 2 |
| AT.AT        | 16 | 43506965 | 43506992 | 14      | .                  | .       | intergenic | 0.044  | .             | 2 |
| AGC.GCT      | 16 | 43508680 | 43508693 | 4.66667 | .                  | .       | intergenic | 0.014  | rs791293949   | 2 |
| AT.AT        | 16 | 43513619 | 43513640 | 11      | .                  | .       | intergenic | 0.449  | rs786538720   | 4 |
| AAAC.GTTT    | 16 | 43754923 | 43754945 | 5.75    | .                  | .       | intergenic | 0.182  | rs790084382   | 2 |
| AAAT.ATTT    | 16 | 43785052 | 43785074 | 5.75    | .                  | .       | intergenic | -0.045 | .             | 2 |
| AAAT.ATTT    | 16 | 43824890 | 43824911 | 5.5     | .                  | .       | intergenic | 0.13   | rs793326782   | 2 |
| AC.GT        | 16 | 44018765 | 44018774 | 5       | .                  | .       | intergenic | 0.171  | rs788669519   | 2 |
| AAAG.CTTT    | 16 | 44406519 | 44406537 | 4.75    | .                  | .       | intergenic | 0.458  | 369099 rs7879 | 2 |
| AAAC.GTTT    | 16 | 44556840 | 44556863 | 6       | .                  | .       | intergenic | 0.074  | rs792603949   | 2 |
| AAAAC.GTTTT  | 16 | 45142716 | 45142738 | 4.6     | .                  | .       | intergenic | 0.081  | .             | 2 |
| AC.GT        | 16 | 45359435 | 45359449 | 7.5     | .                  | .       | intergenic | 0.069  | rs791318897   | 2 |
| AG.CT        | 16 | 45727702 | 45727714 | 6.5     | .                  | .       | intergenic | -0.01  | rs702123902   | 3 |
| AAC.GTT      | 16 | 45737366 | 45737391 | 8.66667 | .                  | .       | intergenic | .      | rs786306000   | 2 |
| AAAAAC.GTTTT | 16 | 45802341 | 45802364 | 4       | ENSSSCT00000018449 | RNF180  | intron     | .      | rs788086072   | 2 |
| AAAC.GTTT    | 16 | 46037801 | 46037833 | 8.25    | .                  | .       | intergenic | .      | rs787148390   | 2 |
| AG.CT        | 16 | 46166740 | 46166751 | 6       | .                  | .       | intergenic | .      | rs793234682   | 2 |
| AT.AT        | 16 | 46326495 | 46326509 | 7.5     | .                  | .       | intergenic | 0.168  | .             | 4 |
| AG.CT        | 16 | 46390113 | 46390131 | 9.5     | .                  | .       | intergenic | .      | rs792981997   | 2 |
| AAAC.GTTT    | 16 | 46403295 | 46403320 | 6.5     | .                  | .       | intergenic | .      | rs789658714   | 2 |
| AAAT.ATTT    | 16 | 46592525 | 46592540 | 4       | ENSSSCT00000018450 | CWC27   | intron     | 1.867  | .             | 2 |
| AAAG.CTTT    | 16 | 46746600 | 46746619 | 5       | ENSSSCT00000018450 | CWC27   | intron     | .      | rs786832153   | 2 |
| AAAAG.CTTTT  | 16 | 46813099 | 46813115 | 3.4     | ENSSSCT00000018450 | CWC27   | intron     | -0.474 | rs790408024   | 2 |
| AG.CT        | 16 | 46929006 | 46929021 | 8       | .                  | .       | intergenic | 0.116  | .             | 2 |
| AC.GT        | 16 | 47153045 | 47153062 | 9       | ENSSSCT00000018451 | ADAMTS6 | intron     | 0.091  | rs791325048   | 2 |



|               |    |          |          |         |                    |         |            |        |               |   |
|---------------|----|----------|----------|---------|--------------------|---------|------------|--------|---------------|---|
| AC.GT         | 16 | 47841009 | 47841021 | 6.5     | ENSSSCT00000018461 | .       | intron     | 0.217  | rs787174159   | 2 |
| AC.GT         | 16 | 48013672 | 48013684 | 6.5     | .                  | .       | intergenic | .      | rs790226252   | 9 |
| AT.AT         | 16 | 48117708 | 48117721 | 7       | .                  | .       | intergenic | 0.154  | 374409 rs7882 | 4 |
| AAG.CTT       | 16 | 48414825 | 48414845 | 7       | .                  | .       | intergenic | 0.148  | rs792489384   | 2 |
| AC.GT         | 16 | 49015565 | 49015577 | 6.5     | .                  | .       | intergenic | 0.021  | rs788837988   | 2 |
| AG.CT         | 16 | 49191912 | 49191921 | 5       | .                  | .       | intergenic | -0.036 | rs788487689   | 4 |
| AT.AT         | 16 | 49480419 | 49480431 | 6.5     | .                  | .       | intergenic | 0.285  | 315188 rs7878 | 2 |
| ACAT.ATGT     | 16 | 49544476 | 49544500 | 6.25    | .                  | .       | intergenic | -0.009 | 310779 rs7866 | 2 |
| AC.GT         | 16 | 49795505 | 49795517 | 6.5     | .                  | .       | intergenic | 0.054  | rs789722624   | 2 |
| AAT.ATT       | 16 | 49821209 | 49821234 | 8.66667 | .                  | .       | intergenic | 0.104  | rs791275763   | 2 |
| ATC.GAT       | 16 | 49878566 | 49878593 | 9.33333 | .                  | .       | intergenic | -0.164 | rs788104531   | 2 |
| AAAAT.ATTTT   | 16 | 50380838 | 50380862 | 5       | ENSSSCT00000035672 | PIK3R1  | promoter   | .      | rs791402474   | 2 |
| AAAAT.ATTTT   | 16 | 50380838 | 50380862 | 5       | ENSSSCT00000036318 | PIK3R1  | promoter   | .      | rs791402474   | 2 |
| AAAAT.ATTTT   | 16 | 50380838 | 50380862 | 5       | ENSSSCT00000033449 | PIK3R1  | promoter   | .      | rs791402474   | 2 |
| AAAAT.ATTTT   | 16 | 50380838 | 50380862 | 5       | ENSSSCT00000035520 | PIK3R1  | promoter   | .      | rs791402474   | 2 |
| ACAGC.GCTGT   | 16 | 50671100 | 50671114 | 3       | .                  | .       | intergenic | 0.118  | rs787574372   | 2 |
| AAC.GTT       | 16 | 50750983 | 50751005 | 7.66667 | .                  | .       | intergenic | .      | rs787778303   | 2 |
| AC.GT         | 16 | 50799990 | 50800002 | 6.5     | .                  | .       | intergenic | 0.318  | rs792910277   | 2 |
| AG.CT         | 16 | 50851774 | 50851786 | 6.5     | .                  | .       | intergenic | -0.116 | .             | 2 |
| AAAAC.GTTTT   | 16 | 50940917 | 50940941 | 4.16667 | .                  | .       | intergenic | 0.425  | rs694182392   | 2 |
| AC.GT         | 16 | 51246153 | 51246169 | 8.5     | ENSSSCT00000026613 | CENPH   | promoter   | .      | rs786427825   | 2 |
| AT.AT         | 16 | 51395383 | 51395394 | 6       | ENSSSCT00000018473 | .       | intron     | 0.153  | rs793654442   | 2 |
| AT.AT         | 16 | 51395383 | 51395394 | 6       | ENSSSCT00000030315 | .       | intron     | 0.153  | rs793654442   | 2 |
| AAAC.GTTT     | 16 | 51541514 | 51541536 | 5.75    | .                  | .       | intergenic | -0.07  | .             | 2 |
| AC.GT         | 16 | 51875887 | 51875899 | 6.5     | ENSSSCT00000018480 | .       | intron     | 0.061  | .             | 2 |
| AC.GT         | 16 | 51875887 | 51875899 | 6.5     | ENSSSCT00000026987 | .       | intron     | 0.061  | .             | 2 |
| AAAAG.CTTTT   | 16 | 52178136 | 52178153 | 3.6     | .                  | .       | intergenic | .      | rs786947480   | 2 |
| AAAG.CTTT     | 16 | 52209258 | 52209269 | 3       | .                  | .       | intergenic | 0.247  | rs786627297   | 2 |
| AATG.CATT     | 16 | 52260135 | 52260161 | 6.75    | .                  | .       | intergenic | -0.251 | rs706461025   | 2 |
| AG.CT         | 16 | 52605516 | 52605527 | 6       | ENSSSCT00000018485 | PTCD2   | intron     | -0.024 | .             | 3 |
| AC.GT         | 16 | 52674375 | 52674393 | 9.5     | .                  | .       | intergenic | -0.043 | rs792495326   | 2 |
| AAC.GTT       | 16 | 52852828 | 52852841 | 4.66667 | .                  | .       | intergenic | 0.087  | rs789066109   | 2 |
| AATG.CATT     | 16 | 52853914 | 52853928 | 3.75    | .                  | .       | intergenic | -0.031 | .             | 2 |
| AC.GT         | 16 | 52899421 | 52899432 | 6       | .                  | .       | intergenic | 0.769  | .             | 2 |
| AAAT.ATTT     | 16 | 52974307 | 52974332 | 6.5     | .                  | .       | intergenic | 0.269  | rs789581493   | 2 |
| AAAAC.GTTTT   | 16 | 53285673 | 53285691 | 3.8     | ENSSSCT00000026046 | TNPO1   | intron     | 0.023  | rs787348048   | 2 |
| AG.CT         | 16 | 53548780 | 53548790 | 5.5     | .                  | .       | intergenic | -0.091 | rs787397626   | 2 |
| AACT.AGTT     | 16 | 53694555 | 53694576 | 5.5     | .                  | .       | intergenic | 0.193  | rs789959912   | 2 |
| AC.GT         | 16 | 54102448 | 54102458 | 5.5     | .                  | .       | intergenic | .      | rs789740992   | 2 |
| AAAAC.GTTTT   | 16 | 54713474 | 54713503 | 6       | .                  | .       | intergenic | .      | rs787237117   | 2 |
| AAAAT.ATTTT   | 16 | 54795857 | 54795878 | 4.4     | .                  | .       | intergenic | .      | rs791038902   | 2 |
| AG.CT         | 16 | 54906245 | 54906270 | 13      | .                  | .       | intergenic | 0.284  | rs791926899   | 2 |
| AAAAC.GTTTT   | 16 | 55249413 | 55249431 | 3.8     | .                  | .       | intergenic | .      | rs792896158   | 2 |
| AAAAT.ATTTT   | 16 | 55382996 | 55383014 | 3.8     | .                  | .       | intergenic | -0.145 | rs790463738   | 2 |
| AAAAC.GTTTT   | 16 | 55721037 | 55721059 | 4.6     | .                  | .       | intergenic | -0.044 | 326015 rs7909 | 2 |
| AAT.ATT       | 16 | 56114033 | 56114049 | 5.66667 | .                  | .       | intergenic | -0.153 | 746318 rs7897 | 2 |
| AATG.CATT     | 16 | 56121572 | 56121600 | 7.25    | .                  | .       | intergenic | -0.264 | rs787813209   | 2 |
| AT.AT         | 16 | 56284299 | 56284309 | 5.5     | .                  | .       | intergenic | 0.222  | rs791970621   | 2 |
| ACC.GGT       | 16 | 56423728 | 56423750 | 7.66667 | .                  | .       | intergenic | 0.111  | rs787628462   | 2 |
| AAAT.ATTT     | 16 | 56427778 | 56427808 | 7.75    | ENSSSCT00000018507 | .       | intron     | 0.801  | 762764 rs7889 | 2 |
| AAAATT.AATTTT | 16 | 56591943 | 56591965 | 3.83333 | ENSSSCT00000032458 | FBXW11  | intron     | .      | rs787021002   | 2 |
| AC.GT         | 16 | 57163973 | 57163988 | 8       | ENSSSCT00000018512 | RANBP17 | intron     | .      | .             | 4 |
| AAAG.CTTT     | 16 | 57166645 | 57166669 | 6.25    | ENSSSCT00000018512 | RANBP17 | intron     | .      | rs790413113   | 2 |
| AAAAT.ATTTT   | 16 | 57543718 | 57543751 | 6.8     | .                  | .       | intergenic | 0.105  | 346114 rs7029 | 3 |
| AC.GT         | 16 | 57847677 | 57847695 | 9.5     | .                  | .       | intergenic | -0.044 | rs789915821   | 2 |
| AG.CT         | 16 | 57861391 | 57861418 | 14      | .                  | .       | intergenic | -0.125 | 788994 rs7905 | 2 |
| AG.CT         | 16 | 57953192 | 57953214 | 11.5    | .                  | .       | intergenic | -0.242 | rs790887361   | 2 |
| AG.CT         | 16 | 58030462 | 58030481 | 10      | .                  | .       | intergenic | -0.075 | rs789804324   | 2 |
| AAAG.CTTT     | 16 | 58031659 | 58031678 | 5       | .                  | .       | intergenic | .      | .             | 3 |
| AAT.ATT       | 16 | 58450072 | 58450086 | 5       | .                  | .       | intergenic | 0.082  | rs790212612   | 3 |
| AG.CT         | 16 | 58581663 | 58581693 | 15.5    | .                  | .       | intergenic | 0.618  | rs792354367   | 2 |
| AG.CT         | 16 | 58972300 | 58972316 | 8.5     | .                  | .       | intergenic | 0.036  | rs791724581   | 3 |
| AAAAG.CTTTT   | 16 | 59203121 | 59203149 | 5.8     | .                  | .       | intergenic | 0.986  | .             | 2 |
| AC.GT         | 16 | 59426188 | 59426200 | 6.5     | .                  | .       | intergenic | -0.049 | .             | 2 |
| AG.CT         | 16 | 59525810 | 59525824 | 7.5     | .                  | .       | intergenic | -0.168 | .             | 4 |
| AGGGG.CCCCT   | 16 | 59704195 | 59704210 | 3.2     | ENSSSCT00000018524 | SLIT3   | intron     | 0.051  | rs792112862   | 2 |
| AC.GT         | 16 | 59898680 | 59898692 | 6.5     | .                  | .       | intergenic | 0.143  | .             | 4 |
| AAAAT.ATTTT   | 16 | 59926308 | 59926334 | 5.4     | .                  | .       | intergenic | 0.141  | 193959 rs7906 | 2 |
| ACACT.ATGT    | 16 | 60105986 | 60106005 | 4       | .                  | .       | intergenic | -0.308 | rs793259632   | 2 |
| AAAC.GTTT     | 16 | 60109981 | 60109992 | 3       | .                  | .       | intergenic | -0.129 | rs792479999   | 2 |
| AAAT.ATTT     | 16 | 60120304 | 60120324 | 5.25    | .                  | .       | intergenic | -0.146 | rs786478018   | 2 |
| AG.CT         | 16 | 60574555 | 60574570 | 8       | .                  | .       | intergenic | 0.047  | 375271 rs7883 | 2 |
| AAAAC.GTTTT   | 16 | 60596692 | 60596715 | 4       | .                  | .       | intergenic | 0.015  | rs793037577   | 2 |
| AG.CT         | 16 | 60633891 | 60633905 | 7.5     | .                  | .       | intergenic | 0.029  | rs791566543   | 2 |
| AAAT.ATTT     | 16 | 60739738 | 60739753 | 4       | .                  | .       | intergenic | 0.005  | 391546 rs7874 | 2 |
| AAAAT.ATTTT   | 16 | 60758045 | 60758071 | 5.4     | .                  | .       | intergenic | 0.116  | rs789512268   | 2 |
| AAAG.CTTT     | 16 | 60930130 | 60930148 | 4.75    | .                  | .       | intergenic | 0.023  | rs789687953   | 2 |
| AG.CT         | 16 | 60975992 | 60976010 | 9.5     | .                  | .       | intergenic | 0.35   | .             | 2 |
| AC.GT         | 16 | 61000035 | 61000049 | 7.5     | .                  | .       | intergenic | 0.986  | rs787090999   | 3 |
| AC.GT         | 16 | 61029740 | 61029752 | 6.5     | .                  | .       | intergenic | -0.412 | .             | 2 |
| AAAAC.GTTTT   | 16 | 61074904 | 61074927 | 4.8     | .                  | .       | intergenic | 1.001  | rs787462637   | 2 |
| AACT.AGTT     | 16 | 61112473 | 61112486 | 3.5     | .                  | .       | intergenic | 0.315  | rs787728073   | 2 |
| AAAC.GTTT     | 16 | 61134109 | 61134127 | 4.75    | .                  | .       | intergenic | 0.717  | rs790045943   | 3 |
| AG.CT         | 16 | 61242758 | 61242774 | 8.5     | .                  | .       | intergenic | 0.353  | .             | 3 |

|             |    |          |          |         |                    |        |            |        |               |   |
|-------------|----|----------|----------|---------|--------------------|--------|------------|--------|---------------|---|
| AAAAG.CTTTT | 16 | 61566075 | 61566093 | 3.8     | .                  | .      | intergenic | -0.032 | rs700662049   | 4 |
| AAAAC.GTTTT | 16 | 61904208 | 61904225 | 3.6     | .                  | .      | intergenic | -0.185 | .             | 2 |
| AAC.GTT     | 16 | 61910716 | 61910729 | 4.66667 | .                  | .      | intergenic | 0.694  | 332251 rs7919 | 2 |
| AC.GT       | 16 | 61973932 | 61973946 | 7.5     | .                  | .      | intergenic | -0.159 | 392085 rs7888 | 3 |
| AAAAC.GTTTT | 16 | 62183786 | 62183803 | 3.6     | .                  | .      | intergenic | .      | 184795 rs7870 | 2 |
| AG.CT       | 16 | 62681226 | 62681241 | 8       | .                  | .      | intergenic | 0.37   | .             | 2 |
| AG.CT       | 16 | 62686327 | 62686337 | 5.5     | .                  | .      | intergenic | 0.455  | rs787288146   | 2 |
| ACAG.CTGT   | 16 | 62813120 | 62813135 | 4       | .                  | .      | intergenic | 0.188  | .             | 2 |
| AC.GT       | 16 | 62906703 | 62906721 | 9.5     | .                  | .      | intergenic | 0.081  | rs786812457   | 3 |
| AG.CT       | 16 | 62915138 | 62915147 | 5       | .                  | .      | intergenic | 0.086  | .             | 2 |
| AAAT.ATTT   | 16 | 63225016 | 63225052 | 9.25    | .                  | .      | intergenic | -0.169 | .             | 2 |
| AAAT.ATTT   | 16 | 63273181 | 63273200 | 5       | .                  | .      | intergenic | .      | rs697865892   | 2 |
| AAAT.ATTT   | 16 | 63292920 | 63292949 | 7.5     | .                  | .      | intergenic | -0.049 | 306930 rs7936 | 2 |
| AC.GT       | 16 | 63313183 | 63313194 | 6       | .                  | .      | intergenic | -0.205 | .             | 3 |
| AAAT.ATTT   | 16 | 63314007 | 63314032 | 6.5     | .                  | .      | intergenic | -0.241 | rs791812747   | 2 |
| AAAAC.GTTTT | 16 | 63357809 | 63357829 | 4.2     | .                  | .      | intergenic | .      | .             | 2 |
| AAAC.GTTT   | 16 | 63585451 | 63585465 | 3.75    | .                  | .      | intergenic | .      | 395138 rs7881 | 2 |
| AAAT.ATTT   | 16 | 63605796 | 63605818 | 5.75    | .                  | .      | intergenic | -0.066 | 145204 rs7881 | 2 |
| AAAC.GTTT   | 16 | 63660557 | 63660582 | 6.5     | .                  | .      | intergenic | -0.229 | 368200 rs7870 | 2 |
| AAAC.GTTT   | 16 | 63805391 | 63805414 | 6       | .                  | .      | intergenic | -0.092 | rs790472393   | 2 |
| AC.GT       | 16 | 63824218 | 63824240 | 11.5    | .                  | .      | intergenic | 0.259  | 344640 rs7889 | 4 |
| AAC.GTT     | 16 | 64150302 | 64150319 | 6       | .                  | .      | intergenic | 0.122  | 768292 rs7885 | 3 |
| AG.CT       | 16 | 64386764 | 64386774 | 5.5     | .                  | .      | intergenic | 0.586  | 204157 rs7924 | 2 |
| AAC.GTT     | 16 | 64407250 | 64407262 | 4.33333 | .                  | .      | intergenic | .      | rs786211821   | 2 |
| AG.CT       | 16 | 64458972 | 64458981 | 5       | .                  | .      | intergenic | 0.018  | .             | 2 |
| AAC.GTT     | 16 | 64520285 | 64520301 | 5.66667 | .                  | .      | intergenic | 0.15   | rs791495722   | 2 |
| AAAAC.GTTTT | 16 | 64694487 | 64694512 | 5.2     | .                  | .      | intergenic | 0.269  | rs789424372   | 2 |
| AAAGT.ACTTT | 16 | 64752734 | 64752748 | 3       | .                  | .      | intergenic | 0.117  | .             | 2 |
| AG.CT       | 16 | 64778069 | 64778078 | 5       | .                  | .      | intergenic | -0.095 | rs787059129   | 2 |
| AC.GT       | 16 | 64822010 | 64822020 | 5.5     | .                  | .      | intergenic | 0.151  | rs791118681   | 2 |
| AG.CT       | 16 | 64992500 | 64992513 | 7       | .                  | .      | intergenic | 0.922  | .             | 3 |
| AC.GT       | 16 | 64993805 | 64993817 | 6.5     | .                  | .      | intergenic | 0.234  | 336015 rs7894 | 2 |
| AT.AT       | 16 | 65053959 | 65053970 | 6       | .                  | .      | intergenic | 0.152  | .             | 2 |
| AAAC.GTTT   | 16 | 65145044 | 65145058 | 3.75    | ENSSSCT00000034673 | HMMR   | intron     | .      | rs789677182   | 2 |
| AAAC.GTTT   | 16 | 65145044 | 65145058 | 3.75    | ENSSSCT00000018534 | HMMR   | intron     | .      | rs789677182   | 2 |
| AAAC.GTTT   | 16 | 65145044 | 65145058 | 3.75    | ENSSSCT00000036191 | HMMR   | intron     | .      | rs789677182   | 2 |
| AAAC.GTTT   | 16 | 65145044 | 65145058 | 3.75    | ENSSSCT00000030611 | HMMR   | intron     | .      | rs789677182   | 2 |
| AAAAC.GTTTT | 16 | 65263601 | 65263623 | 4.6     | .                  | .      | intergenic | 0.127  | 249353 rs7906 | 2 |
| AAAC.GTTT   | 16 | 65451465 | 65451483 | 4.75    | .                  | .      | intergenic | 0.181  | 343338 rs7909 | 2 |
| AC.GT       | 16 | 65639527 | 65639537 | 5.5     | .                  | .      | intergenic | 0.047  | 369737 rs7919 | 3 |
| AT.AT       | 16 | 65956972 | 65956982 | 5.5     | .                  | .      | intergenic | .      | rs793851362   | 2 |
| AT.AT       | 16 | 66020579 | 66020588 | 5       | .                  | .      | intergenic | -0.12  | .             | 2 |
| AC.GT       | 16 | 66083607 | 66083618 | 6       | .                  | .      | intergenic | 0.043  | rs703968674   | 4 |
| AATG.CATT   | 16 | 66109737 | 66109755 | 4.75    | .                  | .      | intergenic | -0.128 | 771447 rs7872 | 2 |
| AC.GT       | 16 | 66237578 | 66237593 | 8       | .                  | .      | intergenic | .      | rs787202654   | 2 |
| AT.AT       | 16 | 66429147 | 66429157 | 5.5     | .                  | .      | intergenic | 0.163  | rs790197522   | 2 |
| AT.AT       | 16 | 66957074 | 66957086 | 6.5     | .                  | .      | intergenic | -0.07  | 248801 rs7866 | 2 |
| AAAT.ATTT   | 16 | 67280289 | 67280305 | 4.25    | .                  | .      | intergenic | 0.076  | rs792619129   | 2 |
| AT.AT       | 16 | 67344955 | 67344966 | 6       | .                  | .      | intergenic | 0.033  | rs793829471   | 2 |
| AC.GT       | 16 | 67368567 | 67368576 | 5       | .                  | .      | intergenic | -0.248 | rs693100085   | 3 |
| AC.GT       | 16 | 67397880 | 67397895 | 8       | .                  | .      | intergenic | 0.037  | 253017 rs7932 | 2 |
| AT.AT       | 16 | 67766845 | 67766856 | 6       | .                  | .      | intergenic | 0.037  | 396381 rs7938 | 2 |
| AAAT.ATTT   | 16 | 68339182 | 68339197 | 4       | .                  | .      | intergenic | 0.023  | rs789791920   | 2 |
| AT.AT       | 16 | 68517534 | 68517544 | 5.5     | .                  | .      | intergenic | 0.242  | .             | 2 |
| AAAC.GTTT   | 16 | 68663138 | 68663156 | 4.75    | .                  | .      | intergenic | 0.146  | rs792483906   | 2 |
| AG.CT       | 16 | 68673739 | 68673755 | 8.5     | .                  | .      | intergenic | 0.094  | rs788806629   | 2 |
| ACC.GGT     | 16 | 68718068 | 68718082 | 5       | .                  | .      | intergenic | 0.099  | .             | 2 |
| AT.AT       | 16 | 68767227 | 68767238 | 6       | .                  | .      | intergenic | -0.072 | .             | 2 |
| AC.GT       | 16 | 68925531 | 68925545 | 7.5     | .                  | .      | intergenic | 1.573  | 779955 rs7934 | 2 |
| AC.GT       | 16 | 69076070 | 69076084 | 7.5     | ENSSSCT00000018554 | ADRA1B | intron     | 0.254  | rs787729948   | 3 |
| AT.AT       | 16 | 69865985 | 69866000 | 8       | .                  | .      | intergenic | 0.085  | .             | 2 |
| AAT.ATT     | 16 | 70127727 | 70127739 | 4.33333 | .                  | .      | intergenic | 0.118  | 315916 rs7866 | 2 |
| AAAC.GTTT   | 16 | 70299390 | 70299404 | 3.75    | .                  | .      | intergenic | 0.109  | 371784 rs7913 | 2 |
| AC.GT       | 16 | 70400660 | 70400675 | 8       | .                  | .      | intergenic | 0.559  | 383736 rs7928 | 2 |
| AG.CT       | 16 | 70606464 | 70606475 | 6       | .                  | .      | intergenic | -0.027 | 333159 rs7925 | 4 |
| AC.GT       | 16 | 70618023 | 70618042 | 10      | .                  | .      | intergenic | -0.013 | rs787530618   | 2 |
| AG.CT       | 16 | 70650590 | 70650600 | 5.5     | .                  | .      | intergenic | 0.021  | rs788956908   | 2 |
| AAC.GTT     | 16 | 70706779 | 70706793 | 5       | .                  | .      | intergenic | 0.415  | rs788387433   | 2 |
| AAAAC.GTTTT | 16 | 70833339 | 70833365 | 5.4     | .                  | .      | intergenic | -0.031 | 142578 rs7921 | 2 |
| AT.AT       | 16 | 70834474 | 70834483 | 5       | .                  | .      | intergenic | 0.029  | rs789006462   | 3 |
| AT.AT       | 16 | 70845700 | 70845713 | 7       | .                  | .      | intergenic | 0.079  | 369714 rs7910 | 3 |
| AC.GT       | 16 | 70910605 | 70910615 | 5.5     | .                  | .      | intergenic | 0.056  | rs788819814   | 3 |
| AAAC.GTTT   | 16 | 71044189 | 71044221 | 8.25    | .                  | .      | intergenic | .      | 373034 rs7910 | 2 |
| AATG.CATT   | 16 | 71063513 | 71063531 | 4.75    | .                  | .      | intergenic | 0.021  | rs786225650   | 2 |
| AAAT.ATTT   | 16 | 71167684 | 71167706 | 5.75    | .                  | .      | intergenic | 0.294  | rs791025266   | 2 |
| AAAT.ATTT   | 16 | 71264879 | 71264919 | 10.25   | .                  | .      | intergenic | .      | rs786738689   | 2 |
| AC.GT       | 16 | 71433102 | 71433112 | 5.5     | .                  | .      | intergenic | 0.172  | rs791009551   | 2 |
| AAAC.GTTT   | 16 | 71458734 | 71458756 | 5.75    | ENSSSCT00000018562 | THG1L  | intron     | 0.135  | 369343 rs7896 | 2 |
| AC.GT       | 16 | 71546847 | 71546859 | 6.5     | .                  | .      | intergenic | 0.092  | .             | 2 |
| AC.GT       | 16 | 71687548 | 71687557 | 5       | .                  | .      | intergenic | -0.059 | .             | 4 |
| AG.CT       | 16 | 71722889 | 71722903 | 7.5     | ENSSSCT00000018567 | CYFIP2 | intron     | 1.493  | rs790650791   | 2 |
| AAC.GTT     | 16 | 71945179 | 71945200 | 7.33333 | .                  | .      | intergenic | .      | rs788568997   | 2 |
| AT.AT       | 16 | 71950738 | 71950749 | 6       | ENSSSCT00000018576 | HAVCR1 | intron     | -0.13  | rs789231859   | 2 |
| AAAAC.GTTTT | 16 | 72260337 | 72260361 | 5       | .                  | .      | intergenic | 0.044  | rs790133190   | 2 |

|             |    |          |          |         |                    |          |            |        |                 |   |
|-------------|----|----------|----------|---------|--------------------|----------|------------|--------|-----------------|---|
| AGAT.ATCT   | 16 | 72773644 | 72773655 | 3       | .                  | .        | intergenic | .      | .               | 2 |
| AT.AT       | 16 | 73036396 | 73036405 | 5       | .                  | .        | intergenic | 0.032  | .               | 2 |
| AAC.GTT     | 16 | 73333651 | 73333682 | 10.6667 | .                  | .        | intergenic | .      | rs793626055     | 2 |
| AAG.CTT     | 16 | 73366574 | 73366592 | 6.33333 | .                  | .        | intergenic | 0.056  | .               | 2 |
| AT.AT       | 16 | 73478640 | 73478653 | 7       | .                  | .        | intergenic | 0.005  | rs787625 rs7933 | 2 |
| AAAAC.GTTTT | 16 | 73554207 | 73554237 | 6.2     | .                  | .        | intergenic | 0.108  | rs789221666     | 2 |
| ATC.GAT     | 16 | 73605230 | 73605242 | 4.33333 | .                  | .        | intergenic | 0.238  | .               | 4 |
| AAAAC.GTTTT | 16 | 73913950 | 73913971 | 3.66667 | .                  | .        | intergenic | .      | rs352656 rs7898 | 3 |
| AAAC.GTTT   | 16 | 73940066 | 73940085 | 5       | .                  | .        | intergenic | 0.283  | rs309540 rs7905 | 2 |
| AAAC.GTTT   | 16 | 73952698 | 73952734 | 9.25    | .                  | .        | intergenic | 0.005  | rs32834 rs7864  | 2 |
| AG.CT       | 16 | 73962610 | 73962619 | 5       | .                  | .        | intergenic | -0.118 | rs787889595     | 3 |
| AAT.ATT     | 16 | 74062698 | 74062715 | 6       | .                  | .        | intergenic | 0.159  | rs327344 rs7876 | 2 |
| AAAT.ATTT   | 16 | 74165432 | 74165450 | 4.75    | ENSSSCT00000026183 | .        | intron     | 0.18   | rs793066133     | 2 |
| AAAT.ATTT   | 16 | 74260656 | 74260678 | 5.75    | ENSSSCT00000018582 | CNOT8    | intron     | .      | rs793762889     | 2 |
| AAAC.GTTT   | 16 | 74296308 | 74296330 | 5.75    | ENSSSCT00000018583 | FAXDC2   | intron     | .      | rs788153875     | 2 |
| AAAC.GTTT   | 16 | 74394116 | 74394131 | 4       | .                  | .        | intergenic | 0.111  | rs789208972     | 2 |
| AAAC.GTTT   | 16 | 74711332 | 74711364 | 8.25    | ENSSSCT00000018588 | GALNT10  | intron     | 0.209  | rs748898 rs7913 | 2 |
| AAAT.ATTT   | 16 | 74876438 | 74876462 | 6.25    | ENSSSCT00000018588 | GALNT10  | intron     | 0.014  | rs793756355     | 2 |
| AC.GT       | 16 | 74934137 | 74934157 | 10.5    | .                  | .        | intergenic | 0.438  | .               | 3 |
| AG.CT       | 16 | 74966939 | 74966951 | 6.5     | .                  | .        | intergenic | 0.238  | .               | 2 |
| AT.AT       | 16 | 75309652 | 75309666 | 7.5     | .                  | .        | intergenic | 0.135  | rs788723784     | 2 |
| AT.AT       | 16 | 75393558 | 75393583 | 13      | .                  | .        | intergenic | -0.024 | rs690440782     | 3 |
| AAAAC.GTTTT | 16 | 75507285 | 75507325 | 6.83333 | .                  | .        | intergenic | 0.426  | rs738271 rs7878 | 3 |
| AAC.GTT     | 16 | 75615655 | 75615671 | 5.66667 | .                  | .        | intergenic | 0.176  | rs793655493     | 2 |
| AC.GT       | 16 | 75619258 | 75619268 | 5.5     | .                  | .        | intergenic | 0.076  | rs788354724     | 2 |
| AT.AT       | 16 | 75692800 | 75692810 | 5.5     | .                  | .        | intergenic | 0.028  | rs147992 rs7910 | 3 |
| AAAT.ATTT   | 16 | 75732417 | 75732435 | 4.75    | .                  | .        | intergenic | -0.01  | rs341814 rs7932 | 2 |
| AAT.ATT     | 16 | 75804413 | 75804437 | 8.33333 | .                  | .        | intergenic | -0.028 | rs787607577     | 2 |
| AAC.GTT     | 16 | 75828822 | 75828835 | 4.66667 | ENSSSCT00000021150 | SNORA18  | promoter   | 0.146  | rs789767581     | 2 |
| AGAT.ATCT   | 16 | 75838282 | 75838299 | 4.5     | .                  | .        | intergenic | -0.058 | rs576963 rs7870 | 2 |
| AT.AT       | 16 | 75963045 | 75963063 | 9.5     | .                  | .        | intergenic | -0.105 | .               | 4 |
| AATT.AATT   | 16 | 76084440 | 76084459 | 5       | .                  | .        | intergenic | -0.089 | rs791625241     | 2 |
| AC.GT       | 16 | 76096776 | 76096790 | 7.5     | .                  | .        | intergenic | -0.142 | rs185898 rs7899 | 4 |
| AAAC.GTTT   | 16 | 76188743 | 76188772 | 7.5     | .                  | .        | intergenic | .      | rs314691 rs7906 | 2 |
| AC.GT       | 16 | 76241774 | 76241788 | 7.5     | .                  | .        | intergenic | 0.006  | rs792015599     | 2 |
| ACAT.ATGT   | 16 | 76386781 | 76386797 | 4.25    | .                  | .        | intergenic | .      | rs793864195     | 2 |
| AAT.ATT     | 16 | 76392162 | 76392175 | 4.66667 | .                  | .        | intergenic | -0.014 | rs788860150     | 2 |
| AAAT.ATTT   | 16 | 76396315 | 76396330 | 4       | .                  | .        | intergenic | -0.061 | rs791252130     | 2 |
| AT.AT       | 16 | 76932779 | 76932789 | 5.5     | .                  | .        | intergenic | .      | rs786756811     | 3 |
| AC.GT       | 16 | 77065024 | 77065039 | 8       | .                  | .        | intergenic | 0.205  | rs149560 rs7906 | 2 |
| AT.AT       | 16 | 77262484 | 77262498 | 7.5     | .                  | .        | intergenic | .      | rs791204095     | 3 |
| AC.GT       | 16 | 77324535 | 77324544 | 5       | .                  | .        | intergenic | 0.374  | rs786236392     | 2 |
| AAAAC.GTTTT | 16 | 77371546 | 77371563 | 3       | ENSSSCT00000018594 | GLRA1    | intron     | .      | .               | 2 |
| AAAC.GTTT   | 16 | 77651764 | 77651782 | 4.75    | .                  | .        | intergenic | -0.326 | rs793084259     | 2 |
| AC.GT       | 16 | 77731596 | 77731626 | 15.5    | ENSSSCT00000018600 | FAT2     | intron     | 0.161  | .               | 2 |
| AAAC.GTTT   | 16 | 77883067 | 77883090 | 6       | .                  | .        | intergenic | .      | rs792705437     | 2 |
| AAAC.GTTT   | 16 | 78594134 | 78594148 | 3.75    | .                  | .        | intergenic | .      | rs792698270     | 3 |
| ACAT.ATGT   | 16 | 78601934 | 78601952 | 4.75    | .                  | .        | intergenic | .      | rs790360427     | 2 |
| AC.GT       | 16 | 79178910 | 79178919 | 5       | ENSSSCT00000018613 | SEMA5A   | intron     | -0.27  | .               | 2 |
| AT.AT       | 16 | 79445193 | 79445209 | 8.5     | .                  | .        | intergenic | .      | rs786567053     | 2 |
| AC.GT       | 16 | 79609721 | 79609735 | 7.5     | .                  | .        | intergenic | -0.116 | .               | 2 |
| AC.GT       | 16 | 79624728 | 79624741 | 7       | .                  | .        | intergenic | .      | rs792698911     | 3 |
| AAG.CTT     | 16 | 79693488 | 79693503 | 5.33333 | .                  | .        | intergenic | -0.38  | .               | 2 |
| AAAC.GTTT   | 16 | 79749999 | 79750013 | 3.75    | .                  | .        | intergenic | -0.135 | rs792238405     | 2 |
| AAGAC.GTCTT | 16 | 79888736 | 79888755 | 4       | .                  | .        | intergenic | -0.09  | rs787123363     | 2 |
| AAC.GTT     | 16 | 79897177 | 79897191 | 5       | .                  | .        | intergenic | .      | rs176360 rs7864 | 2 |
| AAAG.CTTT   | 16 | 79920543 | 79920557 | 3.75    | .                  | .        | intergenic | .      | rs787290795     | 2 |
| AC.GT       | 16 | 80020816 | 80020827 | 6       | .                  | .        | intergenic | -0.268 | rs787175608     | 2 |
| AT.AT       | 16 | 80144211 | 80144220 | 5       | .                  | .        | intergenic | -0.077 | rs786425524     | 2 |
| AC.GT       | 16 | 80173267 | 80173283 | 8.5     | .                  | .        | intergenic | -0.045 | rs787874089     | 2 |
| AAAT.ATTT   | 16 | 80207744 | 80207763 | 5       | .                  | .        | intergenic | 0.065  | rs787381802     | 2 |
| AGC.GCT     | 16 | 80493117 | 80493132 | 5.33333 | ENSSSCT00000018619 | ADCY2    | intron     | .      | rs787673946     | 2 |
| AGG.CCT     | 16 | 80696944 | 80696956 | 4.33333 | .                  | .        | intergenic | -0.245 | .               | 2 |
| AG.CT       | 16 | 80946680 | 80946713 | 17      | .                  | .        | intergenic | .      | rs351788 rs7889 | 2 |
| AAT.ATT     | 16 | 80953271 | 80953290 | 6.66667 | .                  | .        | intergenic | -0.166 | .               | 4 |
| AG.CT       | 16 | 81238760 | 81238773 | 7       | .                  | .        | intergenic | .      | .               | 3 |
| AAC.GTT     | 16 | 81260379 | 81260401 | 7.66667 | .                  | .        | intergenic | -0.186 | rs790707918     | 2 |
| AAGGG.CCCTT | 16 | 81443850 | 81443872 | 4.6     | .                  | .        | intergenic | 0.233  | rs787169989     | 2 |
| AAAAC.GTTTT | 16 | 81678987 | 81679007 | 4.2     | ENSSSCT00000018621 | SRD5A1   | intron     | -0.585 | rs328279 rs7869 | 2 |
| AC.GT       | 16 | 81828910 | 81828925 | 8       | ENSSSCT00000018623 | UBE2QL1  | intron     | -0.421 | .               | 3 |
| AAAC.GTTT   | 16 | 81859651 | 81859677 | 6.75    | .                  | .        | intergenic | -0.51  | rs791000701     | 2 |
| AAT.ATT     | 16 | 82034658 | 82034682 | 8.33333 | .                  | .        | intergenic | .      | rs793740434     | 2 |
| AAAT.ATTT   | 16 | 82087345 | 82087359 | 3.75    | .                  | .        | intergenic | 0.093  | rs793194155     | 2 |
| AAAC.GTTT   | 16 | 82159887 | 82159909 | 5.75    | .                  | .        | intergenic | -0.153 | rs788768092     | 2 |
| AAAAC.GTTTT | 16 | 82174059 | 82174083 | 5       | .                  | .        | intergenic | -0.105 | .               | 2 |
| AG.CT       | 16 | 82193716 | 82193734 | 9.5     | .                  | .        | intergenic | -0.482 | rs134434 rs7885 | 2 |
| AAACC.GTTT  | 16 | 82691913 | 82691936 | 4       | ENSSSCT00000018627 | ADAMTS16 | intron     | -0.264 | rs787387215     | 2 |
| AC.GT       | 16 | 83291951 | 83291965 | 7.5     | .                  | .        | intergenic | -0.451 | .               | 2 |
| AG.CT       | 16 | 83349160 | 83349183 | 12      | .                  | .        | intergenic | -0.27  | rs792231064     | 4 |
| AG.CT       | 16 | 83699640 | 83699666 | 13.5    | .                  | .        | intergenic | -0.29  | rs793298740     | 2 |
| AC.GT       | 16 | 84227837 | 84227856 | 10      | .                  | .        | intergenic | .      | rs508503 rs7900 | 2 |
| AC.GT       | 16 | 84734158 | 84734167 | 5       | .                  | .        | intergenic | -0.09  | .               | 2 |
| AAT.ATT     | 16 | 85266104 | 85266121 | 6       | .                  | .        | intergenic | .      | .               | 2 |
| AAAC.GTTT   | 16 | 85788108 | 85788127 | 5       | .                  | .        | intergenic | -0.257 | rs368603 rs7887 | 2 |

|              |    |          |          |         |                    |          |            |        |               |   |
|--------------|----|----------|----------|---------|--------------------|----------|------------|--------|---------------|---|
| AAT.ATT      | 16 | 86546615 | 86546642 | 9.33333 | .                  | .        | intergenic | -0.27  | rs791434716   | 2 |
| AG.CT        | 16 | 86853391 | 86853410 | 10      | .                  | .        | intergenic | -0.186 | .             | 2 |
| \AAAAC.GTTTT | 17 | 410948   | 410975   | 4.66667 | .                  | .        | intergenic | -0.142 | 208309 rs6936 | 2 |
| \AAAAC.GTTTT | 17 | 776357   | 776374   | 3       | .                  | .        | intergenic | 0.68   | 386453 rs7901 | 2 |
| AAG.CTT      | 17 | 1087904  | 1087917  | 4.66667 | .                  | .        | intergenic | -0.165 | rs693826640   | 2 |
| AG.CT        | 17 | 1148957  | 1148967  | 5.5     | .                  | .        | intergenic | .      | .             | 2 |
| AT.AT        | 17 | 1171631  | 1171640  | 5       | .                  | .        | intergenic | 0.048  | rs788697671   | 4 |
| AAAC.GTTT    | 17 | 1614436  | 1614455  | 5       | .                  | .        | intergenic | -0.013 | .             | 3 |
| AAT.ATT      | 17 | 1839436  | 1839447  | 4       | ENSSSCT00000031192 | SGCZ     | intron     | .      | .             | 2 |
| AAAAC.GTTTT  | 17 | 2430649  | 2430678  | 6       | .                  | .        | intergenic | -0.101 | 369219 rs7885 | 2 |
| AAC.GTT      | 17 | 2433069  | 2433082  | 4.66667 | .                  | .        | intergenic | -0.025 | 375924 rs7929 | 2 |
| AT.AT        | 17 | 2476590  | 2476606  | 8.5     | .                  | .        | intergenic | .      | .             | 3 |
| ATC.GAT      | 17 | 2534112  | 2534126  | 5       | .                  | .        | intergenic | 0.046  | rs789138771   | 2 |
| AAAT.ATTT    | 17 | 2572467  | 2572486  | 5       | .                  | .        | intergenic | -0.007 | .             | 2 |
| AG.CT        | 17 | 2622999  | 2623016  | 9       | .                  | .        | intergenic | -0.161 | 176980 rs7909 | 2 |
| AAAAC.GTTTT  | 17 | 2857413  | 2857434  | 4.4     | .                  | .        | intergenic | .      | rs787276276   | 2 |
| AC.GT        | 17 | 3117784  | 3117797  | 7       | .                  | .        | intergenic | 0.083  | rs790589555   | 2 |
| AAT.ATT      | 17 | 3320889  | 3320900  | 4       | .                  | .        | intergenic | .      | .             | 2 |
| \CATAT.ATATG | 17 | 3517170  | 3517187  | 3       | ENSSSCT00000031844 | TUSC3    | intron     | .      | rs786368690   | 2 |
| AAAAT.ATTTT  | 17 | 3537020  | 3537041  | 4.4     | .                  | .        | intergenic | -0.228 | 364080 rs7915 | 2 |
| AG.CT        | 17 | 3737199  | 3737211  | 6.5     | .                  | .        | intergenic | 0.016  | .             | 4 |
| AAC.GTT      | 17 | 3766912  | 3766928  | 5.66667 | .                  | .        | intergenic | .      | .             | 2 |
| AG.CT        | 17 | 4089654  | 4089664  | 5.5     | .                  | .        | intergenic | -0.204 | 782682 rs7928 | 2 |
| AG.CT        | 17 | 4275652  | 4275663  | 6       | .                  | .        | intergenic | .      | rs698293279   | 4 |
| AT.AT        | 17 | 4325482  | 4325495  | 7       | .                  | .        | intergenic | .      | 381288 rs7931 | 2 |
| AAC.GTT      | 17 | 4395792  | 4395806  | 5       | .                  | .        | intergenic | -0.166 | 394112 rs7888 | 2 |
| AAT.ATT      | 17 | 4539656  | 4539678  | 7.66667 | .                  | .        | intergenic | -0.041 | 305946 rs7935 | 3 |
| AAAT.ATTT    | 17 | 4588053  | 4588074  | 5.5     | .                  | .        | intergenic | 0.037  | 237210 rs7868 | 2 |
| AT.AT        | 17 | 4888807  | 4888816  | 5       | .                  | .        | intergenic | 0.031  | 394941 rs7904 | 3 |
| AAAC.GTTT    | 17 | 5136047  | 5136061  | 3.75    | ENSSSCT00000007646 | MICU3    | intron     | .      | 747829 rs7928 | 2 |
| AT.AT        | 17 | 5193862  | 5193881  | 10      | ENSSSCT00000007646 | MICU3    | intron     | .      | .             | 2 |
| AT.AT        | 17 | 5417610  | 5417621  | 6       | ENSSSCT00000007649 | .        | intron     | 1.049  | 388839 rs7902 | 2 |
| AT.AT        | 17 | 5591003  | 5591013  | 5.5     | .                  | .        | intergenic | 0.248  | .             | 3 |
| AT.AT        | 17 | 5711924  | 5711936  | 6.5     | ENSSSCT00000007652 | .        | intron     | -0.069 | rs709001361   | 3 |
| AC.GT        | 17 | 6020488  | 6020502  | 7.5     | .                  | .        | intergenic | 0.023  | rs786737891   | 2 |
| AC.GT        | 17 | 6405934  | 6405948  | 7.5     | ENSSSCT00000007661 | .        | intron     | .      | 371864 rs7884 | 2 |
| AAAT.ATTT    | 17 | 6580001  | 6580026  | 6.5     | .                  | .        | intergenic | .      | 169623 rs7875 | 2 |
| AAGG.CCTT    | 17 | 6991220  | 6991240  | 5.25    | .                  | .        | intergenic | .      | .             | 2 |
| AAT.ATT      | 17 | 7077236  | 7077262  | 9       | .                  | .        | intergenic | .      | 313794 rs7924 | 2 |
| AT.AT        | 17 | 7143965  | 7143976  | 6       | .                  | .        | intergenic | .      | .             | 3 |
| AAC.GTT      | 17 | 7159874  | 7159893  | 6.66667 | .                  | .        | intergenic | .      | rs786736780   | 4 |
| ACAT.ATGT    | 17 | 7168722  | 7168739  | 4.5     | .                  | .        | intergenic | 0.237  | 314324 rs7929 | 2 |
| AAAC.GTTT    | 17 | 7256989  | 7257005  | 4.25    | .                  | .        | intergenic | .      | rs789230809   | 2 |
| AAGG.CCTT    | 17 | 7317535  | 7317552  | 4.5     | .                  | .        | intergenic | .      | 120908 rs7923 | 2 |
| AAAT.ATTT    | 17 | 7361464  | 7361477  | 3.5     | .                  | .        | intergenic | .      | 197230 rs7933 | 2 |
| AT.AT        | 17 | 7373933  | 7373943  | 5.5     | .                  | .        | intergenic | .      | rs792105506   | 2 |
| AT.AT        | 17 | 7789677  | 7789689  | 6.5     | .                  | .        | intergenic | .      | 376900 rs7878 | 2 |
| AT.AT        | 17 | 7894309  | 7894321  | 6.5     | .                  | .        | intergenic | .      | 343339 rs7937 | 2 |
| AC.GT        | 17 | 7909068  | 7909082  | 7.5     | .                  | .        | intergenic | .      | .             | 3 |
| AATG.CATT    | 17 | 7910126  | 7910145  | 5       | .                  | .        | intergenic | .      | rs787583452   | 2 |
| AAAC.GTTT    | 17 | 8121401  | 8121420  | 5       | .                  | .        | intergenic | .      | .             | 2 |
| AAAAC.GTTTT  | 17 | 8175766  | 8175795  | 6       | .                  | .        | intergenic | .      | rs789424798   | 3 |
| AC.GT        | 17 | 8250508  | 8250518  | 5.5     | .                  | .        | intergenic | .      | .             | 3 |
| AAAT.ATTT    | 17 | 8349009  | 8349033  | 6.25    | .                  | .        | intergenic | .      | .             | 2 |
| AC.GT        | 17 | 8380256  | 8380265  | 5       | .                  | .        | intergenic | .      | 389908 rs7873 | 3 |
| AG.CT        | 17 | 8530334  | 8530352  | 9.5     | .                  | .        | intergenic | .      | 313783 rs7916 | 4 |
| AAT.ATT      | 17 | 8598186  | 8598204  | 6.33333 | .                  | .        | intergenic | .      | rs789101481   | 2 |
| AAC.GTT      | 17 | 8656043  | 8656056  | 4.66667 | .                  | .        | intergenic | .      | rs788016126   | 2 |
| AAT.ATT      | 17 | 8723373  | 8723403  | 10.3333 | .                  | .        | intergenic | .      | rs788720855   | 2 |
| AAC.GTT      | 17 | 8801790  | 8801805  | 5.33333 | .                  | .        | intergenic | .      | rs792546362   | 2 |
| AAC.GTT      | 17 | 8912581  | 8912597  | 5.66667 | .                  | .        | intergenic | .      | rs788743123   | 2 |
| AC.GT        | 17 | 9048320  | 9048331  | 6       | .                  | .        | intergenic | .      | rs792827543   | 2 |
| AAAAT.ATTTT  | 17 | 9079126  | 9079146  | 4.2     | .                  | .        | intergenic | .      | .             | 2 |
| AAAGC.GCTTT  | 17 | 9083356  | 9083384  | 5.8     | .                  | .        | intergenic | .      | 327828 rs7904 | 2 |
| AGGG.CCCT    | 17 | 9268602  | 9268621  | 5       | .                  | .        | intergenic | .      | rs791088945   | 2 |
| AC.GT        | 17 | 9338689  | 9338715  | 13.5    | ENSSSCT00000007666 | FAT1     | promoter   | .      | rs790655778   | 3 |
| AAAC.GTTT    | 17 | 9414627  | 9414645  | 4.75    | ENSSSCT00000007666 | FAT1     | intron     | .      | 343909 rs7862 | 2 |
| AAAT.ATTT    | 17 | 9509278  | 9509296  | 4.75    | .                  | .        | intergenic | .      | .             | 2 |
| AAAC.GTTT    | 17 | 9520237  | 9520255  | 4.75    | .                  | .        | intergenic | .      | 767883 rs7875 | 3 |
| AAAT.ATTT    | 17 | 9734117  | 9734140  | 6       | ENSSSCT00000007672 | INTS10   | intron     | -0.24  | rs712559077   | 2 |
| AT.AT        | 17 | 9789948  | 9789958  | 5.5     | .                  | .        | intergenic | 0.029  | rs787074125   | 3 |
| AAAC.GTTT    | 17 | 9791530  | 9791548  | 4.75    | .                  | .        | intergenic | 0.179  | rs788641660   | 2 |
| AT.AT        | 17 | 9941822  | 9941833  | 6       | .                  | .        | intergenic | -0.184 | 347577 rs7887 | 2 |
| AAAC.GTTT    | 17 | 9942079  | 9942093  | 3.75    | .                  | .        | intergenic | .      | rs788111480   | 2 |
| AC.GT        | 17 | 10234842 | 10234854 | 6.5     | ENSSSCT00000007673 | SGALNAC1 | intron     | .      | .             | 2 |
| AC.GT        | 17 | 10400218 | 10400230 | 6.5     | .                  | .        | intergenic | .      | rs692722958   | 3 |
| AAC.GTT      | 17 | 10939271 | 10939292 | 7.33333 | .                  | .        | intergenic | -0.66  | rs793594790   | 2 |
| AAAC.GTTT    | 17 | 10989167 | 10989189 | 5.75    | ENSSSCT00000007676 | ADAM18   | intron     | .      | rs792802194   | 2 |
| AC.GT        | 17 | 11041659 | 11041668 | 5       | .                  | .        | intergenic | .      | rs789193889   | 2 |
| AC.GT        | 17 | 11230009 | 11230031 | 11.5    | .                  | .        | intergenic | -0.008 | 339977 rs7897 | 3 |
| AAC.GTT      | 17 | 11363824 | 11363841 | 6       | ENSSSCT00000007678 | ZMAT4    | intron     | -0.088 | rs789292238   | 2 |
| AGAT.ATCT    | 17 | 11416126 | 11416149 | 6       | .                  | .        | intergenic | 0.075  | rs793052636   | 2 |
| AG.CT        | 17 | 11604167 | 11604177 | 5.5     | .                  | .        | intergenic | -0.102 | .             | 2 |
| AC.GT        | 17 | 11897442 | 11897453 | 6       | .                  | .        | intergenic | -0.073 | rs789100991   | 2 |

|                 |    |          |          |         |                    |        |            |        |                |   |
|-----------------|----|----------|----------|---------|--------------------|--------|------------|--------|----------------|---|
| AAAC.GTTT       | 17 | 12035076 | 12035090 | 3.75    | .                  | .      | intergenic | .      | .              | 2 |
| AAAG.CTTT       | 17 | 12075793 | 12075806 | 3.5     | .                  | .      | intergenic | .      | .              | 2 |
| \AAAAAG.CTTTTT  | 17 | 12171833 | 12171870 | 6.33333 | .                  | .      | intergenic | -0.228 | rs787159455    | 2 |
| AG.CT           | 17 | 12249648 | 12249659 | 6       | ENSSSCT00000007691 | ANK1   | intron     | 2.39   | 348299 rs7908  | 2 |
| ATCC.GGAT       | 17 | 12310121 | 12310142 | 5.5     | ENSSSCT00000007691 | ANK1   | intron     | 0.053  | rs790923318    | 2 |
| AC.GT           | 17 | 12732711 | 12732721 | 5.5     | .                  | .      | intergenic | -0.151 | rs790093760    | 2 |
| AAG.CTT         | 17 | 13059549 | 13059560 | 4       | .                  | .      | intergenic | .      | rs792592164    | 2 |
| AT.AT           | 17 | 13434164 | 13434173 | 5       | .                  | .      | intergenic | -0.004 | rs793755734    | 2 |
| AT.AT           | 17 | 13475743 | 13475756 | 7       | .                  | .      | intergenic | .      | 377877 rs7899  | 2 |
| AC.GT           | 17 | 13478918 | 13478939 | 11      | .                  | .      | intergenic | 0.398  | 236450 rs7931  | 2 |
| AAAG.CTTT       | 17 | 13642884 | 13642895 | 3       | .                  | .      | intergenic | -0.066 | .              | 2 |
| AG.CT           | 17 | 13789016 | 13789025 | 5       | ENSSSCT00000030178 | .      | intron     | -0.04  | .              | 2 |
| AAC.GTT         | 17 | 13838268 | 13838289 | 7.33333 | ENSSSCT00000030178 | .      | intron     | .      | 223977 rs7877  | 2 |
| \AAAAAG.CTTTTT  | 17 | 13930312 | 13930334 | 3.83333 | .                  | .      | intergenic | .      | 761517 rs7878  | 2 |
| AAAC.GTTT       | 17 | 13946979 | 13946995 | 4.25    | ENSSSCT00000028117 | .      | intron     | -0.1   | rs790633316    | 2 |
| AAAT.ATTT       | 17 | 13975457 | 13975474 | 4.5     | ENSSSCT00000028117 | .      | intron     | .      | 783734 rs7873  | 2 |
| AAAAG.CTTTTT    | 17 | 14146415 | 14146444 | 6       | .                  | .      | intergenic | .      | 271028 rs7867  | 2 |
| AG.CT           | 17 | 14148135 | 14148149 | 7.5     | .                  | .      | intergenic | .      | rs788706539    | 3 |
| AAAG.CTTT       | 17 | 14173444 | 14173461 | 4.5     | .                  | .      | intergenic | .      | rs787098090    | 2 |
| AAAT.ATTT       | 17 | 14217017 | 14217035 | 4.75    | ENSSSCT00000007705 | .      | promoter   | -0.171 | rs793177169    | 2 |
| AAAG.CTTT       | 17 | 14252930 | 14252953 | 6       | .                  | .      | intergenic | .      | 1818169 rs7878 | 2 |
| AG.CT           | 17 | 14525694 | 14525708 | 7.5     | .                  | .      | intergenic | .      | .              | 3 |
| AC.GT           | 17 | 14569184 | 14569194 | 5.5     | ENSSSCT00000027193 | RASSF2 | intron     | .      | rs787735379    | 2 |
| AAAT.ATTT       | 17 | 14625455 | 14625479 | 6.25    | .                  | .      | intergenic | -0.033 | rs789716429    | 2 |
| \AAAAAG.CTTTTT  | 17 | 14647300 | 14647326 | 4.5     | .                  | .      | intergenic | -0.069 | rs786531169    | 2 |
| AT.AT           | 17 | 14656935 | 14656954 | 10      | ENSSSCT00000007708 | PRNP   | 3'utr      | 0.675  | .              | 4 |
| AG.CT           | 17 | 14796389 | 14796401 | 6.5     | .                  | .      | intergenic | .      | rs792037222    | 3 |
| AAAC.GTTT       | 17 | 15029611 | 15029629 | 4.75    | .                  | .      | intergenic | 0.185  | 353161 rs7900  | 2 |
| AAAAC.GTTTTT    | 17 | 15238718 | 15238735 | 3.6     | ENSSSCT00000026119 | PROKR2 | intron     | -0.052 | rs787692585    | 3 |
| AG.CT           | 17 | 15314597 | 15314607 | 5.5     | .                  | .      | intergenic | 0.136  | .              | 3 |
| AT.AT           | 17 | 15411546 | 15411558 | 6.5     | .                  | .      | intergenic | .      | rs793837290    | 2 |
| AAT.ATT         | 17 | 15416523 | 15416542 | 6.66667 | .                  | .      | intergenic | .      | rs791227246    | 2 |
| AT.AT           | 17 | 15420557 | 15420570 | 7       | .                  | .      | intergenic | .      | rs792984559    | 3 |
| AG.CT           | 17 | 15444237 | 15444249 | 6.5     | .                  | .      | intergenic | 0.032  | 309303 rs7928  | 2 |
| AAAAT.ATTTT     | 17 | 15446286 | 15446312 | 5.4     | .                  | .      | intergenic | -0.306 | rs791882511    | 2 |
| AT.AT           | 17 | 15502460 | 15502475 | 8       | ENSSSCT00000026307 | GPCPD1 | intron     | 0.163  | rs787536891    | 3 |
| AT.AT           | 17 | 15502460 | 15502475 | 8       | ENSSSCT00000007712 | GPCPD1 | intron     | 0.163  | rs787536891    | 3 |
| AAC.GTT         | 17 | 15550710 | 15550726 | 5.66667 | .                  | .      | intergenic | .      | rs791103244    | 2 |
| AC.GT           | 17 | 15776006 | 15776016 | 5.5     | .                  | .      | intergenic | .      | rs790963178    | 2 |
| AAAT.ATTT       | 17 | 15933048 | 15933073 | 6.5     | ENSSSCT00000007716 | MCM8   | intron     | 0.384  | rs793726909    | 2 |
| AAAT.ATTT       | 17 | 16455096 | 16455111 | 4       | ENSSSCT00000007723 | FERMT1 | intron     | -0.077 | rs792786546    | 2 |
| AC.GT           | 17 | 16891362 | 16891372 | 5.5     | .                  | .      | intergenic | 0.222  | .              | 2 |
| \AAAAAG.CTTTTT  | 17 | 17436892 | 17436914 | 3.83333 | .                  | .      | intergenic | .      | .              | 2 |
| AAAC.GTTT       | 17 | 17474940 | 17474955 | 4       | .                  | .      | intergenic | .      | 363157 rs7909  | 2 |
| AAAAC.GTTTTT    | 17 | 17665124 | 17665154 | 6.2     | .                  | .      | intergenic | 0.083  | rs700211501    | 2 |
| AC.GT           | 17 | 17784859 | 17784868 | 5       | .                  | .      | intergenic | 0.008  | rs790468422    | 2 |
| AAAC.GTTT       | 17 | 18124122 | 18124148 | 6.75    | .                  | .      | intergenic | 0.022  | 132154 rs7896  | 2 |
| AAC.GTT         | 17 | 18128377 | 18128395 | 6.33333 | .                  | .      | intergenic | 0.415  | 346384 rs6929  | 2 |
| AATC.GATT       | 17 | 18467110 | 18467129 | 5       | .                  | .      | intergenic | .      | 165261 rs7886  | 2 |
| AAT.ATT         | 17 | 18864381 | 18864395 | 5       | ENSSSCT00000027927 | HAO1   | intron     | 0.409  | rs700404212    | 2 |
| AG.CT           | 17 | 18882285 | 18882298 | 7       | .                  | .      | intergenic | -0.08  | rs793625297    | 2 |
| AAAT.ATTT       | 17 | 18944256 | 18944275 | 5       | .                  | .      | intergenic | 0.185  | rs793888166    | 2 |
| AAAC.GTTT       | 17 | 19009043 | 19009073 | 7.75    | .                  | .      | intergenic | -0.017 | rs788289848    | 2 |
| AT.AT           | 17 | 19021630 | 19021641 | 6       | .                  | .      | intergenic | .      | rs787403886    | 4 |
| AAC.GTT         | 17 | 19055111 | 19055135 | 8.33333 | .                  | .      | intergenic | .      | rs790961227    | 3 |
| AC.GT           | 17 | 19059365 | 19059377 | 6.5     | .                  | .      | intergenic | 0.339  | rs792165263    | 2 |
| AAG.CTT         | 17 | 19117289 | 19117312 | 8       | .                  | .      | intergenic | 0.148  | rs786255526    | 2 |
| \AAAAAG.CTTTTT  | 17 | 19171154 | 19171181 | 4.66667 | .                  | .      | intergenic | 1.365  | rs791930312    | 3 |
| AAT.ATT         | 17 | 19196210 | 19196225 | 5.33333 | .                  | .      | intergenic | -0.062 | 371952 rs7882  | 2 |
| AGAT.ATCT       | 17 | 19280717 | 19280729 | 3.25    | .                  | .      | intergenic | -0.107 | 370571 rs7931  | 2 |
| AAAT.ATTT       | 17 | 19728305 | 19728319 | 3.75    | ENSSSCT00000007727 | PLCB1  | intron     | 0.022  | 359490 rs7890  | 2 |
| AAAT.ATTT       | 17 | 19735977 | 19735990 | 3.5     | ENSSSCT00000007727 | PLCB1  | intron     | 0.077  | rs786290398    | 2 |
| AT.AT           | 17 | 19843606 | 19843616 | 5.5     | ENSSSCT00000007727 | PLCB1  | intron     | .      | rs786437327    | 3 |
| AC.GT           | 17 | 19907441 | 19907456 | 8       | .                  | .      | intergenic | 0.269  | rs789720474    | 2 |
| AAGG.CCTT       | 17 | 20423649 | 20423663 | 3.75    | .                  | .      | intergenic | -1.678 | rs789450849    | 2 |
| AT.AT           | 17 | 20496267 | 20496276 | 5       | .                  | .      | intergenic | 0.148  | .              | 2 |
| AC.GT           | 17 | 20708583 | 20708598 | 8       | ENSSSCT00000007729 | PLCB4  | intron     | 3.708  | 313010 rs7010  | 5 |
| AC.GT           | 17 | 20716005 | 20716021 | 8.5     | ENSSSCT00000007729 | PLCB4  | intron     | .      | .              | 3 |
| AAAT.ATTT       | 17 | 20781268 | 20781286 | 4.75    | .                  | .      | intergenic | -0.12  | rs786610494    | 2 |
| AAAG.CTTT       | 17 | 20824051 | 20824078 | 7       | .                  | .      | intergenic | 0.037  | 722427 rs7880  | 3 |
| AT.AT           | 17 | 21014731 | 21014743 | 6.5     | .                  | .      | intergenic | .      | rs791698454    | 2 |
| \AAAAAT.ATTTTTT | 17 | 21329780 | 21329802 | 3.83333 | .                  | .      | intergenic | -0.129 | 357934 rs7919  | 2 |
| ACAT.ATGT       | 17 | 21487135 | 21487153 | 4.75    | .                  | .      | intergenic | 0.147  | .              | 2 |
| AG.CT           | 17 | 21500098 | 21500122 | 12.5    | .                  | .      | intergenic | 0.181  | rs792509019    | 2 |
| AT.AT           | 17 | 21502491 | 21502502 | 6       | .                  | .      | intergenic | 0.157  | 318067 rs7898  | 2 |
| AAC.GTT         | 17 | 21518808 | 21518827 | 6.66667 | .                  | .      | intergenic | -0.15  | 398085 rs7918  | 2 |
| ATC.GAT         | 17 | 21519311 | 21519333 | 7.66667 | .                  | .      | intergenic | 0.042  | 305882 rs7904  | 2 |
| AC.GT           | 17 | 21566526 | 21566556 | 15.5    | .                  | .      | intergenic | .      | 172045 rs7876  | 2 |
| AATC.GATT       | 17 | 21592480 | 21592500 | 5.25    | .                  | .      | intergenic | .      | rs793082830    | 2 |
| AAAC.GTTT       | 17 | 21683467 | 21683491 | 6.25    | ENSSSCT00000030392 | .      | intron     | 0.173  | 390527 rs7898  | 2 |
| AAC.GTT         | 17 | 21694285 | 21694301 | 5.66667 | ENSSSCT00000030392 | .      | intron     | 0.095  | 383530 rs7868  | 2 |
| AAAC.GTTT       | 17 | 21725943 | 21725970 | 7       | .                  | .      | intergenic | -0.028 | 146834 rs7915  | 2 |
| AAAAC.GTTTTT    | 17 | 21733326 | 21733359 | 6.8     | .                  | .      | intergenic | -0.047 | 323388 rs7905  | 2 |
| AC.GT           | 17 | 21958191 | 21958200 | 5       | ENSSSCT00000007737 | SLX4IP | intron     | 0.074  | 326462 rs7915  | 2 |

|             |    |          |          |         |                    |        |            |        |               |   |
|-------------|----|----------|----------|---------|--------------------|--------|------------|--------|---------------|---|
| AAC.GTT     | 17 | 22076880 | 22076896 | 5.66667 | ENSSSCT00000007738 | JAG1   | intron     | -0.1   | rs789609887   | 2 |
| AC.GT       | 17 | 22364515 | 22364529 | 7.5     | .                  | .      | intergenic | 0.097  | .             | 2 |
| AG.CT       | 17 | 22495915 | 22495924 | 5       | .                  | .      | intergenic | 0.067  | rs787880805   | 2 |
| AT.AT       | 17 | 22592726 | 22592739 | 7       | .                  | .      | intergenic | 0.082  | 304262 rs7880 | 2 |
| AC.GT       | 17 | 22754677 | 22754696 | 10      | .                  | .      | intergenic | .      | rs793400492   | 3 |
| AAAT.ATTT   | 17 | 23103541 | 23103556 | 4       | .                  | .      | intergenic | .      | rs789940311   | 5 |
| AAT.ATT     | 17 | 23177053 | 23177077 | 8.33333 | .                  | .      | intergenic | -0.044 | rs792646305   | 2 |
| AAGG.CCTT   | 17 | 23204029 | 23204040 | 3       | .                  | .      | intergenic | -0.059 | .             | 2 |
| AC.GT       | 17 | 23229580 | 23229594 | 7.5     | .                  | .      | intergenic | 0.197  | rs790329930   | 2 |
| AAAC.GTTT   | 17 | 23291492 | 23291508 | 4.25    | .                  | .      | intergenic | 0.174  | rs788466079   | 2 |
| AC.GT       | 17 | 23506987 | 23507005 | 9.5     | .                  | .      | intergenic | 0.229  | 728073 rs7921 | 2 |
| ACC.GGT     | 17 | 23648671 | 23648690 | 6.66667 | .                  | .      | intergenic | 0.192  | rs793348122   | 3 |
| AC.GT       | 17 | 23679140 | 23679152 | 6.5     | .                  | .      | intergenic | 0.038  | .             | 3 |
| AAT.ATT     | 17 | 23755438 | 23755454 | 5.66667 | .                  | .      | intergenic | .      | rs790879274   | 2 |
| AT.AT       | 17 | 23885199 | 23885218 | 10      | .                  | .      | intergenic | -0.127 | 375132 rs7884 | 2 |
| AAAC.GTTT   | 17 | 24285509 | 24285535 | 6.75    | .                  | .      | intergenic | -0.228 | rs789245939   | 2 |
| AAT.ATT     | 17 | 24305341 | 24305357 | 5.66667 | .                  | .      | intergenic | .      | rs789420133   | 2 |
| AG.CT       | 17 | 24432542 | 24432558 | 8.5     | ENSSSCT00000007743 | SPTLC3 | intron     | -0.045 | .             | 4 |
| AAAAC.GTTTT | 17 | 24433395 | 24433433 | 7.8     | ENSSSCT00000007743 | SPTLC3 | intron     | -0.337 | 308090 rs7910 | 4 |
| AAAT.ATTT   | 17 | 24440481 | 24440493 | 3.25    | ENSSSCT00000007743 | SPTLC3 | intron     | 0.128  | rs793565688   | 2 |
| AACT.AGTT   | 17 | 24632251 | 24632265 | 3.75    | .                  | .      | intergenic | 0.099  | 152503 rs7888 | 2 |
| AC.GT       | 17 | 24639124 | 24639136 | 6.5     | .                  | .      | intergenic | 0.096  | rs788808200   | 2 |
| AG.CT       | 17 | 24690554 | 24690564 | 5.5     | .                  | .      | intergenic | 0.035  | rs786692219   | 3 |
| AG.CT       | 17 | 24809670 | 24809682 | 6.5     | .                  | .      | intergenic | 0.186  | rs790932374   | 2 |
| AT.AT       | 17 | 25201249 | 25201261 | 6.5     | ENSSSCT00000007749 | SEL1L2 | intron     | 0.037  | 339279 rs7912 | 2 |
| AAAAC.GTTTT | 17 | 25242255 | 25242278 | 4.8     | ENSSSCT00000007749 | SEL1L2 | intron     | 0.266  | .             | 2 |
| AT.AT       | 17 | 25596123 | 25596135 | 6.5     | .                  | .      | intergenic | .      | 223497 rs7909 | 2 |
| AGC.GCT     | 17 | 25614867 | 25614882 | 5.33333 | .                  | .      | intergenic | 0.125  | 340918 rs7871 | 2 |
| AAAT.ATTT   | 17 | 25723656 | 25723679 | 6       | .                  | .      | intergenic | 0.223  | rs789465956   | 2 |
| AC.GT       | 17 | 25992365 | 25992401 | 18.5    | .                  | .      | intergenic | 0.024  | .             | 2 |
| AAAAC.GTTTT | 17 | 26151466 | 26151483 | 3       | .                  | .      | intergenic | .      | 284385 rs7936 | 2 |
| AT.AT       | 17 | 26234030 | 26234040 | 5.5     | .                  | .      | intergenic | 0.044  | .             | 2 |
| AG.CT       | 17 | 26541955 | 26541966 | 6       | .                  | .      | intergenic | 0.081  | rs789430745   | 3 |
| AAG.CTT     | 17 | 26786043 | 26786067 | 8.33333 | .                  | .      | intergenic | -0.067 | 355760 rs7920 | 3 |
| AAAC.GTTT   | 17 | 26815779 | 26815798 | 5       | .                  | .      | intergenic | 0.122  | rs789124219   | 2 |
| AAAAC.GTTTT | 17 | 26893814 | 26893834 | 4.2     | .                  | .      | intergenic | .      | 308331 rs7876 | 2 |
| AC.GT       | 17 | 26979556 | 26979576 | 10.5    | .                  | .      | intergenic | 0.055  | rs793554991   | 2 |
| AAAG.CTTT   | 17 | 27029140 | 27029160 | 5.25    | .                  | .      | intergenic | 0.751  | .             | 2 |
| AAC.GTT     | 17 | 27261267 | 27261287 | 7       | .                  | .      | intergenic | 0.121  | rs786838129   | 2 |
| AAAT.ATTT   | 17 | 27341953 | 27341976 | 6       | .                  | .      | intergenic | 0.032  | 275642 rs7929 | 3 |
| AAT.ATT     | 17 | 27405128 | 27405152 | 8.33333 | .                  | .      | intergenic | -0.007 | 162785 rs7908 | 2 |
| AC.GT       | 17 | 27475194 | 27475203 | 5       | .                  | .      | intergenic | 0.303  | rs787343614   | 2 |
| AG.CT       | 17 | 27478411 | 27478426 | 8       | .                  | .      | intergenic | -0.009 | rs793832608   | 3 |
| AAT.ATT     | 17 | 27494475 | 27494488 | 4.66667 | .                  | .      | intergenic | 0.027  | 344342 rs7862 | 2 |
| AC.GT       | 17 | 27500262 | 27500276 | 7.5     | .                  | .      | intergenic | .      | rs788747993   | 2 |
| AT.AT       | 17 | 28008962 | 28008971 | 5       | .                  | .      | intergenic | -0.036 | rs788368965   | 2 |
| AC.GT       | 17 | 28010601 | 28010611 | 5.5     | .                  | .      | intergenic | .      | .             | 3 |
| AAAAC.GTTTT | 17 | 28034470 | 28034491 | 4.4     | .                  | .      | intergenic | .      | rs787694790   | 2 |
| AAAC.GTTT   | 17 | 28271561 | 28271575 | 3.75    | ENSSSCT00000030802 | KIF16B | intron     | .      | rs791393125   | 2 |
| AAAC.GTTT   | 17 | 28271561 | 28271575 | 3.75    | ENSSSCT00000007751 | KIF16B | intron     | .      | rs791393125   | 2 |
| AAAAC.GTTTT | 17 | 28354947 | 28354965 | 3.16667 | ENSSSCT00000030802 | KIF16B | intron     | -0.063 | rs791113750   | 2 |
| AAAAC.GTTTT | 17 | 28354947 | 28354965 | 3.16667 | ENSSSCT00000007751 | KIF16B | intron     | -0.063 | rs791113750   | 2 |
| AAC.GTT     | 17 | 28361349 | 28361362 | 4.66667 | ENSSSCT00000030802 | KIF16B | intron     | 0.053  | rs788279451   | 2 |
| AAC.GTT     | 17 | 28361349 | 28361362 | 4.66667 | ENSSSCT00000007751 | KIF16B | intron     | 0.053  | rs788279451   | 2 |
| AT.AT       | 17 | 28444180 | 28444201 | 11      | .                  | .      | intergenic | .      | rs791523716   | 2 |
| AAAAC.GTTTT | 17 | 28541590 | 28541610 | 4.2     | .                  | .      | intergenic | 0.58   | 362898 rs7881 | 2 |
| AT.AT       | 17 | 28669231 | 28669244 | 7       | .                  | .      | intergenic | .      | rs793213335   | 2 |
| AG.CT       | 17 | 28819083 | 28819097 | 7.5     | .                  | .      | intergenic | 0.214  | rs792074641   | 2 |
| AT.AT       | 17 | 28906857 | 28906868 | 6       | .                  | .      | intergenic | .      | rs789148591   | 2 |
| AGG.CCT     | 17 | 29086814 | 29086846 | 11      | .                  | .      | intergenic | 0.061  | rs788566202   | 2 |
| AGG.CCT     | 17 | 29207583 | 29207603 | 7       | ENSSSCT00000007755 | PCSK2  | intron     | -0.198 | .             | 2 |
| AATG.CATT   | 17 | 29525980 | 29526016 | 9.25    | .                  | .      | intergenic | 0.092  | rs789121172   | 2 |
| AAAG.CTTT   | 17 | 29743647 | 29743658 | 3       | .                  | .      | intergenic | -0.101 | rs791238635   | 2 |
| AAAAC.GTTTT | 17 | 29810482 | 29810507 | 4.33333 | .                  | .      | intergenic | 0.116  | rs792486788   | 2 |
| AAAAC.GTTTT | 17 | 30029186 | 30029204 | 3.8     | ENSSSCT00000022008 | U6     | promoter   | .      | rs790183053   | 2 |
| ACT.AGT     | 17 | 30185161 | 30185178 | 6       | ENSSSCT00000007766 | .      | intron     | .      | rs788055647   | 2 |
| AAAG.CTTT   | 17 | 30472464 | 30472486 | 5.75    | ENSSSCT00000007771 | SCP2D1 | promoter   | 0.062  | rs787897889   | 2 |
| AC.GT       | 17 | 30472879 | 30472889 | 5.5     | ENSSSCT00000007771 | SCP2D1 | promoter   | 0.642  | rs788267253   | 2 |
| AC.GT       | 17 | 30885413 | 30885441 | 14.5    | .                  | .      | intergenic | -0.477 | .             | 3 |
| AAAT.ATTT   | 17 | 30970372 | 30970389 | 4.5     | .                  | .      | intergenic | -0.412 | .             | 2 |
| AAAAC.GTTTT | 17 | 31023536 | 31023555 | 4       | .                  | .      | intergenic | -0.094 | rs790887252   | 2 |
| AAG.CTT     | 17 | 31026511 | 31026525 | 5       | .                  | .      | intergenic | 0.006  | rs790979159   | 2 |
| AAAAC.GTTTT | 17 | 31031568 | 31031596 | 5.8     | .                  | .      | intergenic | .      | rs793677976   | 2 |
| AC.GT       | 17 | 31051526 | 31051540 | 7.5     | .                  | .      | intergenic | -0.533 | rs789325850   | 3 |
| ACAT.ATGT   | 17 | 31166172 | 31166203 | 8       | .                  | .      | intergenic | .      | rs789825753   | 2 |
| AC.GT       | 17 | 31187489 | 31187499 | 5.5     | .                  | .      | intergenic | -0.101 | rs788302377   | 2 |
| AG.CT       | 17 | 31233914 | 31233924 | 5.5     | .                  | .      | intergenic | -0.022 | 170604 rs7868 | 2 |
| AC.GT       | 17 | 31412684 | 31412701 | 9       | ENSSSCT00000028523 | .      | intron     | 0.058  | .             | 2 |
| AC.GT       | 17 | 31412684 | 31412701 | 9       | ENSSSCT00000007772 | .      | intron     | 0.058  | .             | 2 |
| AC.GT       | 17 | 31412684 | 31412701 | 9       | ENSSSCT00000024048 | .      | intron     | 0.058  | .             | 2 |
| AC.GT       | 17 | 31451902 | 31451916 | 7.5     | ENSSSCT00000028523 | .      | intron     | -0.197 | rs790325298   | 4 |
| AC.GT       | 17 | 31451902 | 31451916 | 7.5     | ENSSSCT00000007772 | .      | intron     | -0.197 | rs790325298   | 4 |
| AC.GT       | 17 | 31451902 | 31451916 | 7.5     | ENSSSCT00000024048 | .      | intron     | -0.197 | rs790325298   | 4 |
| AC.GT       | 17 | 31466732 | 31466743 | 6       | ENSSSCT00000028523 | .      | intron     | -0.193 | .             | 2 |

|             |    |          |          |         |                    |          |            |        |               |   |
|-------------|----|----------|----------|---------|--------------------|----------|------------|--------|---------------|---|
| AC.GT       | 17 | 31466732 | 31466743 | 6       | ENSSSCT0000007772  | .        | intron     | -0.193 | .             | 2 |
| AC.GT       | 17 | 31466732 | 31466743 | 6       | ENSSSCT00000024048 | .        | intron     | -0.193 | .             | 2 |
| AAAC.GTTT   | 17 | 31550016 | 31550036 | 5.25    | .                  | .        | intergenic | -0.039 | 522613 rs7912 | 2 |
| AAAC.GTTT   | 17 | 31765305 | 31765328 | 6       | ENSSSCT00000023356 | .        | intron     | 0.108  | rs786414763   | 2 |
| AAAC.GTTT   | 17 | 31765305 | 31765328 | 6       | ENSSSCT0000007775  | .        | intron     | 0.108  | rs786414763   | 2 |
| AAAAT.ATTTT | 17 | 31774068 | 31774086 | 3.8     | ENSSSCT00000023356 | .        | intron     | .      | rs790111198   | 2 |
| AT.AT       | 17 | 32110314 | 32110325 | 6       | .                  | .        | intergenic | 0.126  | 70587 rs7877  | 2 |
| AG.CT       | 17 | 32736340 | 32736349 | 5       | .                  | .        | intergenic | 1.084  | rs788431717   | 3 |
| AAAC.GTTT   | 17 | 32775463 | 32775480 | 4.5     | .                  | .        | intergenic | -0.075 | rs788061374   | 2 |
| AAAC.GTTT   | 17 | 32886719 | 32886738 | 5       | .                  | .        | intergenic | 0.208  | rs788938331   | 2 |
| AC.GT       | 17 | 33029088 | 33029100 | 6.5     | ENSSSCT0000007780  | .        | intron     | -0.238 | .             | 3 |
| AAAC.GTTT   | 17 | 33067336 | 33067355 | 5       | ENSSSCT0000007781  | XRN2     | intron     | .      | .             | 4 |
| AAC.GTT     | 17 | 33123465 | 33123480 | 5.33333 | ENSSSCT0000007781  | XRN2     | intron     | -0.192 | rs695856537   | 2 |
| AC.GT       | 17 | 33259634 | 33259645 | 6       | .                  | .        | intergenic | -0.102 | rs789475638   | 2 |
| AC.GT       | 17 | 33425247 | 33425281 | 17.5    | .                  | .        | intergenic | -0.169 | rs791593152   | 2 |
| ACAG.CTGT   | 17 | 33496456 | 33496480 | 6.25    | .                  | .        | intergenic | .      | rs788073640   | 2 |
| AAAT.ATTT   | 17 | 33639789 | 33639815 | 6.75    | .                  | .        | intergenic | -0.214 | rs787673050   | 2 |
| AT.AT       | 17 | 34213113 | 34213123 | 5.5     | .                  | .        | intergenic | -0.354 | rs791933003   | 2 |
| ACT.AGT     | 17 | 34908194 | 34908220 | 9       | ENSSSCT0000007803  | .        | intron     | -0.277 | 390048 rs7892 | 2 |
| AC.GT       | 17 | 34914680 | 34914691 | 6       | ENSSSCT0000007803  | .        | intron     | -0.728 | .             | 2 |
| AC.GT       | 17 | 34942541 | 34942553 | 6.5     | ENSSSCT0000007804  | .        | intron     | 0.052  | 534822 rs7875 | 2 |
| AC.GT       | 17 | 35215896 | 35215919 | 12      | ENSSSCT0000007807  | NINL     | intron     | -0.061 | .             | 4 |
| AC.GT       | 17 | 35215896 | 35215919 | 12      | ENSSSCT00000026945 | NINL     | intron     | -0.061 | .             | 4 |
| AT.AT       | 17 | 35623738 | 35623748 | 5.5     | .                  | .        | intergenic | -0.077 | rs789988502   | 2 |
| AAAAC.GTTTT | 17 | 36089940 | 36089959 | 4       | .                  | .        | intergenic | .      | rs792814749   | 2 |
| AAAT.ATTT   | 17 | 36111478 | 36111496 | 4.75    | .                  | .        | intergenic | 0.423  | rs790726812   | 2 |
| AGG.CCT     | 17 | 36273861 | 36273883 | 7.66667 | .                  | .        | intergenic | 0.147  | .             | 2 |
| AC.GT       | 17 | 36870393 | 36870405 | 6.5     | .                  | .        | intergenic | 0.212  | rs791067662   | 2 |
| AC.GT       | 17 | 37020875 | 37020885 | 5.5     | ENSSSCT0000007839  | PTPRA    | intron     | 2.235  | rs788479611   | 2 |
| AAAC.GTTT   | 17 | 37054130 | 37054150 | 5.25    | ENSSSCT0000007839  | PTPRA    | intron     | 0.276  | rs791046241   | 2 |
| AC.GT       | 17 | 37127854 | 37127864 | 5.5     | .                  | .        | intergenic | 0.116  | .             | 2 |
| AAC.GTT     | 17 | 37183875 | 37183886 | 4       | ENSSSCT0000007840  | VPS16    | intron     | .      | rs789244729   | 2 |
| AC.GT       | 17 | 37268979 | 37268993 | 7.5     | ENSSSCT0000007844  | EBF4     | intron     | 0.166  | rs793088418   | 2 |
| AAAAT.ATTTT | 17 | 37425494 | 37425510 | 3.4     | .                  | .        | intergenic | -0.14  | rs790066501   | 2 |
| AAAC.GTTT   | 17 | 38093682 | 38093699 | 4.5     | .                  | .        | intergenic | 0.008  | 319226 rs7895 | 2 |
| AC.GT       | 17 | 38794016 | 38794029 | 7       | .                  | .        | intergenic | 0.228  | rs792557192   | 2 |
| AG.CT       | 17 | 39094704 | 39094719 | 8       | ENSSSCT0000007877  | ANGPT4   | intron     | -0.015 | .             | 2 |
| AAG.CTT     | 17 | 39200287 | 39200299 | 4.33333 | .                  | .        | intergenic | .      | rs790624803   | 2 |
| AAG.CTT     | 17 | 39623004 | 39623024 | 7       | ENSSSCT0000007890  | NRSN2    | promoter   | 0.085  | rs787598028   | 2 |
| AAAT.ATTT   | 17 | 39822466 | 39822483 | 4.5     | .                  | .        | intergenic | .      | rs788627349   | 2 |
| AAAT.ATTT   | 17 | 39992547 | 39992571 | 6.25    | .                  | .        | intergenic | .      | rs790674418   | 2 |
| AAAAT.ATTTT | 17 | 40320809 | 40320827 | 3.8     | .                  | .        | intergenic | .      | rs789424556   | 2 |
| AAAC.GTTT   | 17 | 40715817 | 40715831 | 3.75    | ENSSSCT0000007928  | TM9SF4   | intron     | 0.056  | rs792989989   | 2 |
| AC.GT       | 17 | 40952673 | 40952684 | 6       | ENSSSCT0000007930  | ASXL1    | intron     | .      | rs793263044   | 4 |
| AAAAC.GTTTT | 17 | 40969434 | 40969455 | 3.66667 | ENSSSCT0000007930  | ASXL1    | intron     | -0.181 | rs787561533   | 2 |
| AT.AT       | 17 | 41114297 | 41114315 | 9.5     | .                  | .        | intergenic | 0.1    | rs792357156   | 2 |
| AAAC.GTTT   | 17 | 41616021 | 41616035 | 3.75    | ENSSSCT0000007941  | .        | intron     | 0.221  | rs786407133   | 2 |
| ATCC.GGAT   | 17 | 41656314 | 41656346 | 8.25    | .                  | .        | intergenic | -0.182 | 320702 rs7875 | 2 |
| AAAT.ATTT   | 17 | 42037072 | 42037087 | 4       | ENSSSCT00000030451 | CBFA2T2  | intron     | .      | rs787981246   | 2 |
| AAAC.GTTT   | 17 | 42038183 | 42038209 | 6.75    | ENSSSCT00000030451 | CBFA2T2  | intron     | .      | rs787802748   | 2 |
| AAAT.ATTT   | 17 | 42045443 | 42045467 | 6.25    | ENSSSCT00000030451 | CBFA2T2  | intron     | -0.091 | 116702 rs7910 | 2 |
| AAC.GTT     | 17 | 42165140 | 42165153 | 4.66667 | ENSSSCT0000007955  | .        | intron     | 2.857  | rs789769921   | 2 |
| AC.GT       | 17 | 42274878 | 42274888 | 5.5     | .                  | .        | intergenic | 0.077  | .             | 3 |
| AAAC.GTTT   | 17 | 42437701 | 42437724 | 6       | .                  | .        | intergenic | .      | rs788584551   | 2 |
| AC.GT       | 17 | 42453328 | 42453338 | 5.5     | .                  | .        | intergenic | 0.041  | .             | 4 |
| AAC.GTT     | 17 | 42468831 | 42468855 | 8.33333 | .                  | .        | intergenic | .      | rs791629325   | 3 |
| AAAAC.GTTTT | 17 | 43070855 | 43070878 | 4.8     | ENSSSCT0000007965  | ITCH     | intron     | .      | rs786224516   | 2 |
| AAAAC.GTTTT | 17 | 43070855 | 43070878 | 4.8     | ENSSSCT00000036055 | ITCH     | intron     | .      | rs786224516   | 2 |
| AAAAC.GTTTT | 17 | 43070855 | 43070878 | 4.8     | ENSSSCT00000036444 | ITCH     | intron     | .      | rs786224516   | 2 |
| AAAAC.GTTTT | 17 | 43171147 | 43171171 | 5       | ENSSSCT0000007967  | PIGU     | intron     | .      | 287018 rs7872 | 2 |
| AAAT.ATTT   | 17 | 43239906 | 43239934 | 7.25    | ENSSSCT0000007967  | PIGU     | intron     | .      | rs791763004   | 2 |
| AC.GT       | 17 | 43302469 | 43302483 | 7.5     | ENSSSCT00000025489 | TP53INP2 | intron     | 0.381  | 367589 rs7899 | 5 |
| AAAT.ATTT   | 17 | 43746636 | 43746653 | 4.5     | .                  | .        | intergenic | .      | rs786585630   | 2 |
| AAAT.ATTT   | 17 | 43748657 | 43748675 | 4.75    | .                  | .        | intergenic | .      | rs793353344   | 2 |
| AAAAC.GTTTT | 17 | 43757898 | 43757916 | 3.8     | .                  | .        | intergenic | .      | rs789277823   | 2 |
| AG.CT       | 17 | 43800079 | 43800093 | 7.5     | .                  | .        | intergenic | .      | rs786912706   | 2 |
| AAC.GTT     | 17 | 44064192 | 44064208 | 5.66667 | ENSSSCT00000024698 | .        | intron     | .      | rs787353273   | 2 |
| AAAC.GTTT   | 17 | 44395668 | 44395682 | 3.75    | ENSSSCT0000007997  | RBM39    | intron     | .      | 768622 rs7884 | 2 |
| AC.GT       | 17 | 44540480 | 44540491 | 6       | .                  | .        | intergenic | 0.467  | .             | 2 |
| AATG.CATT   | 17 | 44877272 | 44877287 | 4       | ENSSSCT0000008003  | EPB41L1  | intron     | 0.054  | 155201 rs7934 | 2 |
| AT.AT       | 17 | 45167571 | 45167581 | 5.5     | .                  | .        | intergenic | .      | rs789949945   | 2 |
| AAAC.GTTT   | 17 | 45415812 | 45415836 | 6.25    | ENSSSCT0000008012  | NDRG3    | intron     | 0.203  | rs793774537   | 2 |
| AAAAC.GTTTT | 17 | 45418303 | 45418325 | 4.6     | ENSSSCT0000008012  | NDRG3    | intron     | 0.109  | 391922 rs7912 | 2 |
| AAAT.ATTT   | 17 | 45489992 | 45490004 | 3.25    | ENSSSCT0000008014  | SOGA1    | intron     | 0.026  | rs792517554   | 2 |
| AT.AT       | 17 | 45557309 | 45557328 | 10      | ENSSSCT00000028674 | SAMHD1   | 3'utr      | 0.157  | rs793198034   | 2 |
| AT.AT       | 17 | 45557309 | 45557328 | 10      | ENSSSCT00000023002 | .        | 3'utr      | 0.157  | rs793198034   | 2 |
| AAAC.GTTT   | 17 | 45720774 | 45720785 | 3       | .                  | .        | intergenic | .      | .             | 2 |
| AAAC.GTTT   | 17 | 45735846 | 45735869 | 6       | .                  | .        | intergenic | .      | rs788091313   | 2 |
| AC.GT       | 17 | 45878990 | 45879000 | 5.5     | ENSSSCT0000008023  | GHRH     | intron     | .      | .             | 2 |
| AC.GT       | 17 | 46301814 | 46301843 | 15      | ENSSSCT00000024027 | CTNBL1   | intron     | 0.899  | 531262 rs7867 | 3 |
| ACAT.ATGT   | 17 | 46921715 | 46921729 | 3.75    | .                  | .        | intergenic | .      | .             | 2 |
| AAAC.GTTT   | 17 | 47126753 | 47126771 | 4.75    | .                  | .        | intergenic | -0.466 | rs789385262   | 2 |
| AG.CT       | 17 | 47283004 | 47283016 | 6.5     | ENSSSCT0000008042  | PPP1R16B | intron     | .      | .             | 2 |
| AAC.GTT     | 17 | 47542861 | 47542873 | 4.33333 | .                  | .        | intergenic | .      | rs787786366   | 3 |



|              |    |          |          |         |                     |         |            |        |                 |   |
|--------------|----|----------|----------|---------|---------------------|---------|------------|--------|-----------------|---|
| AAAC.GTTT    | 17 | 47553168 | 47553192 | 6.25    | .                   | .       | intergenic | -0.067 | rs787770571     | 2 |
| AAAC.GTTT    | 17 | 47747319 | 47747349 | 7.75    | .                   | .       | intergenic | .      | rs61536 rs7896  | 2 |
| \AAAAC.GTTTT | 17 | 47829826 | 47829848 | 3.83333 | .                   | .       | intergenic | -0.061 | rs793244534     | 2 |
| AT.AT        | 17 | 47886406 | 47886419 | 7       | .                   | .       | intergenic | 0.178  | rs792227898     | 3 |
| AC.GT        | 17 | 48558588 | 48558598 | 5.5     | .                   | .       | intergenic | -0.137 | .               | 3 |
| AAT.ATT      | 17 | 48619690 | 48619707 | 6       | .                   | .       | intergenic | 0.109  | rs791840147     | 2 |
| AAAT.ATTT    | 17 | 49069604 | 49069627 | 6       | .                   | .       | intergenic | .      | rs38568 rs7931  | 2 |
| AAAAG.CTTTT  | 17 | 49121095 | 49121120 | 5.2     | .                   | .       | intergenic | 0.301  | rs789510259     | 2 |
| AAT.ATT      | 17 | 49129929 | 49129944 | 5.33333 | .                   | .       | intergenic | 0.236  | rs786825039     | 2 |
| AC.GT        | 17 | 49599207 | 49599219 | 6.5     | .                   | .       | intergenic | 0.222  | rs786536495     | 2 |
| AG.CT        | 17 | 49626297 | 49626327 | 15.5    | ENSSSCT00000027570  | .       | intron     | 0.311  | rs788981323     | 2 |
| AAAC.GTTT    | 17 | 49885384 | 49885407 | 6       | .                   | .       | intergenic | 0.032  | rs396537 rs7906 | 2 |
| AC.GT        | 17 | 49944397 | 49944410 | 7       | .                   | .       | intergenic | 0.129  | rs73244 rs7887  | 2 |
| AAAC.GTTT    | 17 | 50129341 | 50129355 | 3.75    | .                   | .       | intergenic | .      | rs789695156     | 2 |
| AT.AT        | 17 | 50530620 | 50530631 | 6       | ENSSSCT00000029823  | PTPRT   | intron     | -0.236 | rs790101313     | 4 |
| AAAAT.ATTTT  | 17 | 50587024 | 50587041 | 3.6     | ENSSSCT00000029823  | PTPRT   | intron     | -0.107 | rs788705093     | 2 |
| AG.CT        | 17 | 50609798 | 50609808 | 5.5     | ENSSSCT00000029823  | PTPRT   | intron     | 0.411  | rs788837009     | 2 |
| AC.GT        | 17 | 50622337 | 50622350 | 7       | ENSSSCT00000029823  | PTPRT   | intron     | -0.23  | rs793106284     | 2 |
| AC.GT        | 17 | 50763597 | 50763615 | 9.5     | .                   | .       | intergenic | 0.037  | rs371062 rs7935 | 2 |
| \AAACC.GGTTT | 17 | 50879587 | 50879618 | 5.33333 | .                   | .       | intergenic | -0.083 | rs790629617     | 3 |
| AG.CT        | 17 | 50892171 | 50892181 | 5.5     | .                   | .       | intergenic | -0.073 | rs792198746     | 2 |
| AAAAC.GTTTT  | 17 | 51348342 | 51348358 | 3.4     | .                   | .       | intergenic | 0.34   | rs787895442     | 2 |
| AG.CT        | 17 | 51359476 | 51359491 | 8       | .                   | .       | intergenic | -0.247 | rs792716598     | 3 |
| AC.GT        | 17 | 51885392 | 51885402 | 5.5     | ENSSSCT00000008064  | .       | intron     | -0.131 | rs789274346     | 2 |
| AG.CT        | 17 | 51990711 | 51990723 | 6.5     | ENSSSCT00000008064  | .       | intron     | .      | .               | 2 |
| AC.GT        | 17 | 52000555 | 52000569 | 7.5     | ENSSSCT00000008064  | .       | intron     | .      | rs791707390     | 2 |
| AC.GT        | 17 | 52000555 | 52000569 | 7.5     | ENSSSCT000000030459 | .       | intron     | .      | rs791707390     | 2 |
| AAAT.ATTT    | 17 | 52568106 | 52568121 | 4       | .                   | .       | intergenic | .      | rs792815840     | 2 |
| AC.GT        | 17 | 52748834 | 52748844 | 5.5     | .                   | .       | intergenic | .      | rs788659010     | 2 |
| AAAT.ATTT    | 17 | 52787253 | 52787289 | 9.25    | .                   | .       | intergenic | .      | .               | 2 |
| AAAC.GTTT    | 17 | 52832761 | 52832781 | 5.25    | ENSSSCT00000008080  | PABPC1L | intron     | -0.014 | rs216722 rs7901 | 2 |
| AAAAC.GTTTT  | 17 | 53279348 | 53279365 | 3.6     | ENSSSCT00000008095  | .       | 3'utr      | .      | rs792123636     | 2 |
| AAAAC.GTTTT  | 17 | 53279348 | 53279365 | 3.6     | ENSSSCT00000008102  | .       | intron     | .      | rs792123636     | 2 |
| AAAT.ATTT    | 17 | 53519967 | 53519982 | 4       | .                   | .       | intergenic | 0.052  | rs753629 rs7927 | 2 |
| AAC.GTT      | 17 | 53566448 | 53566463 | 5.33333 | .                   | .       | intergenic | .      | rs789781051     | 4 |
| \AAACC.GGTTT | 17 | 53591632 | 53591651 | 3.33333 | .                   | .       | intergenic | .      | rs792812495     | 2 |
| AC.GT        | 17 | 53615322 | 53615338 | 8.5     | .                   | .       | intergenic | 0.01   | .               | 3 |
| AT.AT        | 17 | 53633622 | 53633636 | 7.5     | ENSSSCT00000008124  | WFDC3   | intron     | 0.001  | rs371053 rs7908 | 2 |
| AT.AT        | 17 | 53633622 | 53633636 | 7.5     | ENSSSCT00000008123  | WFDC3   | intron     | 0.001  | rs371053 rs7908 | 2 |
| AG.CT        | 17 | 53848938 | 53848947 | 5       | ENSSSCT00000008141  | SLC12A5 | intron     | 0.138  | rs793605231     | 2 |
| AT.AT        | 17 | 54295713 | 54295732 | 10      | .                   | .       | intergenic | 0.024  | .               | 2 |
| AAT.ATT      | 17 | 54374402 | 54374420 | 6.33333 | ENSSSCT00000008150  | .       | promoter   | .      | rs786830462     | 2 |
| AGC.GCT      | 17 | 54917245 | 54917256 | 4       | ENSSSCT00000008157  | EYA2    | intron     | 0.089  | rs367974 rs7865 | 2 |
| AG.CT        | 17 | 55023886 | 55023898 | 6.5     | ENSSSCT00000008157  | EYA2    | intron     | -0.266 | rs392380 rs7903 | 3 |
| AAGG.CCTT    | 17 | 56820557 | 56820575 | 4.75    | .                   | .       | intergenic | -0.18  | rs792826776     | 2 |
| AC.GT        | 17 | 56869715 | 56869726 | 6       | .                   | .       | intergenic | .      | rs704343609     | 2 |
| \AAAAC.GTTTT | 17 | 57054054 | 57054079 | 4.33333 | ENSSSCT00000008164  | ARFGEF2 | intron     | -0.07  | rs793276396     | 2 |
| AAAC.GTTT    | 17 | 57249955 | 57249982 | 7       | ENSSSCT00000026255  | .       | intron     | -0.158 | rs789630884     | 2 |
| AG.CT        | 17 | 57390910 | 57390921 | 6       | ENSSSCT00000008166  | KCNB1   | intron     | -0.182 | rs790360582     | 2 |
| ACAG.CTGT    | 17 | 57429498 | 57429516 | 4.75    | ENSSSCT00000008166  | KCNB1   | intron     | -0.534 | rs790063358     | 3 |
| AAAAG.CTTTT  | 17 | 57620499 | 57620513 | 3       | .                   | .       | intergenic | 0.221  | rs790011982     | 2 |
| AATG.CATT    | 17 | 57655940 | 57655971 | 8       | .                   | .       | intergenic | 0.259  | rs273254 rs7936 | 2 |
| AAAAC.GTTTT  | 17 | 57890490 | 57890505 | 3.2     | ENSSSCT00000029578  | UBE2V1  | intron     | -0.177 | rs790296074     | 2 |
| ATCC.GGAT    | 17 | 58310792 | 58310810 | 4.75    | .                   | .       | intergenic | -0.334 | .               | 2 |
| \AAAAC.GTTTT | 17 | 58815301 | 58815326 | 4.33333 | ENSSSCT00000008179  | DPM1    | intron     | 0.044  | rs751851 rs7882 | 2 |
| \AAAAC.GTTTT | 17 | 58815301 | 58815326 | 4.33333 | ENSSSCT000000033789 | DPM1    | intron     | 0.044  | rs751851 rs7882 | 2 |
| \AAAAC.GTTTT | 17 | 58815301 | 58815326 | 4.33333 | ENSSSCT000000034996 | DPM1    | intron     | 0.044  | rs751851 rs7882 | 2 |
| \AAAAC.GTTTT | 17 | 58815301 | 58815326 | 4.33333 | ENSSSCT000000034352 | DPM1    | promoter   | 0.044  | rs751851 rs7882 | 2 |
| AAAG.CTTT    | 17 | 58993068 | 58993081 | 3.5     | .                   | .       | intergenic | -0.008 | rs300567 rs7880 | 2 |
| AC.GT        | 17 | 59057547 | 59057558 | 6       | .                   | .       | intergenic | 0.294  | .               | 2 |
| AG.CT        | 17 | 59082876 | 59082891 | 8       | .                   | .       | intergenic | 0.106  | rs788656405     | 3 |
| AAGG.CCTT    | 17 | 59235002 | 59235020 | 4.75    | ENSSSCT000000034393 | NFATC2  | intron     | -0.151 | rs785162 rs7916 | 2 |
| AAGG.CCTT    | 17 | 59235002 | 59235020 | 4.75    | ENSSSCT00000008184  | NFATC2  | intron     | -0.151 | rs785162 rs7916 | 2 |
| AAAG.CTTT    | 17 | 59677048 | 59677064 | 4.25    | .                   | .       | intergenic | .      | rs786668978     | 2 |
| ACAT.ATGT    | 17 | 59717708 | 59717721 | 3.5     | .                   | .       | intergenic | .      | .               | 2 |
| AT.AT        | 17 | 59853449 | 59853461 | 6.5     | .                   | .       | intergenic | 0.048  | rs698645216     | 2 |
| AAG.CTT      | 17 | 60052651 | 60052673 | 7.66667 | .                   | .       | intergenic | -0.043 | .               | 2 |
| AC.GT        | 17 | 60066059 | 60066069 | 5.5     | .                   | .       | intergenic | 0.096  | rs793759247     | 2 |
| AC.GT        | 17 | 60183400 | 60183411 | 6       | .                   | .       | intergenic | -0.316 | rs789206155     | 2 |
| AG.CT        | 17 | 60602324 | 60602350 | 13.5    | .                   | .       | intergenic | 0.025  | rs277253 rs7862 | 2 |
| AC.GT        | 17 | 60720865 | 60720875 | 5.5     | .                   | .       | intergenic | 0.339  | rs788386399     | 2 |
| AC.GT        | 17 | 61067019 | 61067031 | 6.5     | ENSSSCT000000034759 | TSHZ2   | intron     | -0.16  | rs324910 rs7908 | 2 |
| AG.CT        | 17 | 61196778 | 61196792 | 7.5     | ENSSSCT000000034759 | TSHZ2   | intron     | 0.184  | .               | 2 |
| AAAAG.CTTTT  | 17 | 61221976 | 61221990 | 3       | ENSSSCT000000034759 | TSHZ2   | intron     | -0.409 | rs788945266     | 2 |
| AAG.CTT      | 17 | 61333452 | 61333464 | 4.33333 | .                   | .       | intergenic | .      | rs774386 rs7900 | 2 |
| AT.AT        | 17 | 61339142 | 61339160 | 9.5     | .                   | .       | intergenic | 0.101  | .               | 2 |
| AAAC.GTTT    | 17 | 61376323 | 61376337 | 3.75    | .                   | .       | intergenic | 0.107  | rs385620 rs7881 | 2 |
| AC.GT        | 17 | 61552371 | 61552392 | 11      | .                   | .       | intergenic | 0.297  | rs786929085     | 3 |
| AC.GT        | 17 | 61738637 | 61738646 | 5       | ENSSSCT00000008194  | BCAS1   | intron     | -0.337 | rs342762 rs7910 | 2 |
| AC.GT        | 17 | 61861510 | 61861519 | 5       | .                   | .       | intergenic | -0.092 | rs789471760     | 3 |
| AG.CT        | 17 | 62729115 | 62729128 | 7       | .                   | .       | intergenic | 0.547  | rs789714250     | 2 |
| AC.GT        | 17 | 62842535 | 62842548 | 7       | .                   | .       | intergenic | -0.041 | rs323606 rs7892 | 4 |
| AG.CT        | 17 | 62932099 | 62932126 | 14      | .                   | .       | intergenic | .      | rs786365080     | 2 |
| AC.GT        | 17 | 62995953 | 62995965 | 6.5     | .                   | .       | intergenic | -0.296 | .               | 4 |

|               |    |          |          |         |                    |             |            |        |              |   |
|---------------|----|----------|----------|---------|--------------------|-------------|------------|--------|--------------|---|
| AATG.CATT     | 17 | 63118150 | 63118172 | 5.75    | .                  | .           | intergenic | -0.17  | rs786459929  | 2 |
| AT.AT         | 17 | 63210011 | 63210020 | 5       | .                  | .           | intergenic | -0.025 | rs789618714  | 4 |
| AAT.ATT       | 17 | 63235254 | 63235268 | 5       | .                  | .           | intergenic | -0.021 | .            | 2 |
| AAAAAC.GTTTT  | 17 | 63458339 | 63458358 | 3.33333 | .                  | .           | intergenic | -0.109 | rs787152782  | 2 |
| AAAAG.CTTTT   | 17 | 63562812 | 63562827 | 3.2     | .                  | .           | intergenic | 0.007  | rs786452926  | 2 |
| AC.GT         | 17 | 63631321 | 63631333 | 6.5     | .                  | .           | intergenic | 0.663  | rs7910373006 | 2 |
| AT.AT         | 17 | 63640926 | 63640939 | 7       | .                  | .           | intergenic | -0.028 | .            | 2 |
| AAAT.ATTT     | 17 | 63900424 | 63900438 | 3.75    | .                  | .           | intergenic | 0.49   | rs7913305874 | 2 |
| AAAG.CTTT     | 17 | 64070393 | 64070407 | 3.75    | ENSSSCT00000036639 | AURKA       | intron     | .      | rs793883159  | 2 |
| AC.GT         | 17 | 64123581 | 64123591 | 5.5     | ENSSSCT00000008202 | AURKA       | intron     | .      | rs793883159  | 2 |
| AC.GT         | 17 | 64123581 | 64123591 | 5.5     | ENSSSCT00000036338 | CASS4       | intron     | -0.013 | rs793612080  | 2 |
| AAC.GTT       | 17 | 64183024 | 64183037 | 4.66667 | ENSSSCT00000008204 | CASS4       | intron     | -0.013 | rs793612080  | 2 |
| AAC.GTT       | 17 | 64183024 | 64183037 | 4.66667 | ENSSSCT00000033915 | RTFDC1      | intron     | -0.097 | .            | 2 |
| AAAC.GTTT     | 17 | 64183024 | 64183037 | 4.66667 | ENSSSCT00000008206 | RTFDC1      | intron     | -0.097 | .            | 2 |
| AAAC.GTTT     | 17 | 64375556 | 64375573 | 4.5     | ENSSSCT00000036126 | RTFDC1      | intron     | -0.097 | .            | 2 |
| AC.GT         | 17 | 64504561 | 64504588 | 14      | .                  | .           | intergenic | 0.042  | rs7935346317 | 2 |
| AAAATT.AATTTT | 17 | 64644981 | 64644999 | 3.16667 | .                  | .           | intergenic | -0.443 | rs7897799626 | 2 |
| AATG.CATT     | 17 | 64657987 | 64658004 | 4.5     | .                  | .           | intergenic | -0.258 | .            | 2 |
| AGG.CCT       | 17 | 64712026 | 64712040 | 5       | .                  | .           | intergenic | -0.297 | rs791688942  | 2 |
| AC.GT         | 17 | 65387499 | 65387511 | 6.5     | .                  | .           | intergenic | -0.49  | rs790085415  | 2 |
| ATCC.GGAT     | 17 | 65387499 | 65387511 | 6.5     | .                  | .           | intergenic | -0.367 | rs787555801  | 2 |
| AC.GT         | 17 | 65477889 | 65477914 | 6.5     | .                  | .           | intergenic | -0.446 | rs788306071  | 2 |
| AC.GT         | 17 | 65535731 | 65535742 | 6       | .                  | .           | intergenic | -0.185 | rs7905221018 | 2 |
| AT.AT         | 17 | 65555021 | 65555030 | 5       | .                  | .           | intergenic | .      | .            | 2 |
| AC.GT         | 17 | 65591794 | 65591804 | 5.5     | ENSSSCT00000008225 | 17H20ORF1   | intron     | -0.173 | .            | 2 |
| AAAAC.GTTTT   | 17 | 65717256 | 65717282 | 5.4     | .                  | .           | intergenic | 0.252  | rs7867131444 | 2 |
| AAGG.CCTT     | 17 | 66840156 | 66840175 | 5       | .                  | .           | intergenic | -0.43  | rs786747283  | 2 |
| AC.GT         | 17 | 66913966 | 66913975 | 5       | .                  | .           | intergenic | -0.464 | .            | 2 |
| AAAAT.ATTTT   | 17 | 67153397 | 67153415 | 3.8     | ENSSSCT00000036671 | PHACTR3     | intron     | -0.376 | rs7898173426 | 2 |
| AAAAT.ATTTT   | 17 | 67153397 | 67153415 | 3.8     | ENSSSCT00000035421 | PHACTR3     | intron     | -0.376 | rs7898173426 | 2 |
| AAAAT.ATTTT   | 17 | 67446205 | 67446227 | 4.6     | .                  | .           | intergenic | -0.037 | rs698287139  | 2 |
| AG.CT         | 17 | 67447916 | 67447928 | 6.5     | .                  | .           | intergenic | 0.404  | rs792013594  | 2 |
| AGGC.GCCT     | 17 | 67539637 | 67539659 | 5.75    | .                  | .           | intergenic | -0.039 | .            | 2 |
| AAAT.ATTT     | 17 | 67720405 | 67720423 | 4.75    | .                  | .           | intergenic | -0.255 | rs787840688  | 2 |
| AC.GT         | 17 | 68087358 | 68087367 | 5       | .                  | .           | intergenic | 0.772  | rs791133304  | 4 |
| AC.GT         | 17 | 68370597 | 68370608 | 6       | .                  | .           | intergenic | -0.195 | rs788824286  | 2 |
| AC.GT         | 17 | 68391072 | 68391091 | 10      | ENSSSCT00000008269 | .           | intron     | -0.511 | .            | 3 |
| AC.GT         | 17 | 68456453 | 68456478 | 13      | .                  | .           | intergenic | -0.279 | rs786418583  | 2 |
| AC.GT         | 17 | 68684460 | 68684484 | 12.5    | .                  | .           | intergenic | .      | rs793217486  | 3 |
| AG.CT         | 17 | 69068456 | 69068474 | 9.5     | .                  | .           | intergenic | .      | rs787750384  | 2 |
| AAAC.GTTT     | 18 | 56411    | 56427    | 4.25    | .                  | .           | intergenic | 0.108  | rs7909390708 | 2 |
| AAAAT.ATTTT   | 18 | 2810648  | 2810663  | 3.2     | .                  | .           | intergenic | .      | rs792338680  | 2 |
| AC.GT         | 18 | 3811552  | 3811569  | 9       | .                  | .           | intergenic | -0.257 | rs791615176  | 2 |
| AAAC.GTTT     | 18 | 3862549  | 3862566  | 4.5     | .                  | .           | intergenic | -0.265 | rs789346633  | 2 |
| AAGC.GCTT     | 18 | 4339929  | 4339943  | 3.75    | .                  | .           | intergenic | -0.477 | rs7890384215 | 2 |
| AAAC.GTTT     | 18 | 4416305  | 4416317  | 3.25    | .                  | .           | intergenic | -0.16  | rs7888734693 | 2 |
| AT.AT         | 18 | 4531456  | 4531474  | 9.5     | .                  | .           | intergenic | -0.281 | .            | 3 |
| AAAC.GTTT     | 18 | 4689169  | 4689186  | 4.5     | .                  | .           | intergenic | -0.023 | rs791183761  | 2 |
| AAAAC.GTTTT   | 18 | 4888123  | 4888147  | 5       | .                  | .           | intergenic | 0.14   | rs788251996  | 2 |
| AAC.GTT       | 18 | 4965017  | 4965028  | 4       | ENSSSCT00000017888 | XRCC2       | intron     | -0.139 | rs787696050  | 2 |
| AAC.GTT       | 18 | 4965017  | 4965028  | 4       | ENSSSCT00000017887 | ACTR3B      | intron     | -0.139 | rs787696050  | 2 |
| AAC.GTT       | 18 | 5309670  | 5309694  | 8.33333 | .                  | .           | intergenic | .      | rs7934355472 | 2 |
| AC.GT         | 18 | 5444278  | 5444290  | 6.5     | ENSSSCT00000022851 | .           | promoter   | -0.046 | rs787049062  | 2 |
| AC.GT         | 18 | 5618849  | 5618861  | 6.5     | ENSSSCT00000017891 | GALNT11     | intron     | .      | rs792081555  | 2 |
| AAAAC.GTTTT   | 18 | 5663877  | 5663897  | 4.2     | ENSSSCT00000017892 | GALNTL5     | intron     | -0.107 | rs7865711972 | 2 |
| AAAC.GTTT     | 18 | 5753671  | 5753689  | 4.75    | .                  | .           | intergenic | .      | rs792749474  | 2 |
| AAAC.GTTT     | 18 | 5811201  | 5811216  | 4       | ENSSSCT00000025093 | .           | intron     | -0.227 | rs788391813  | 2 |
| AAAAC.GTTTT   | 18 | 6037277  | 6037304  | 5.6     | ENSSSCT00000017895 | RHEB        | intron     | .      | rs7906364163 | 2 |
| ACCT.AGGT     | 18 | 6292701  | 6292714  | 3.5     | ENSSSCT00000017897 | ssc-mir-671 | promoter   | -0.113 | .            | 2 |
| AAAG.CTTT     | 18 | 7165057  | 7165075  | 4.75    | ENSSSCT00000017925 | CLCN1       | intron     | 2.402  | rs789811323  | 2 |
| AAAC.GTTT     | 18 | 7236549  | 7236570  | 5.5     | ENSSSCT00000017929 | GSTK1       | intron     | 0.02   | rs699773451  | 2 |
| AAAC.GTTT     | 18 | 7247813  | 7247835  | 5.75    | .                  | .           | intergenic | .      | rs7923326275 | 2 |
| AC.GT         | 18 | 7396246  | 7396258  | 6.5     | .                  | .           | intergenic | .      | rs7934374058 | 2 |
| AAAAC.GTTTT   | 18 | 7409125  | 7409139  | 3       | .                  | .           | intergenic | .      | rs792133428  | 2 |
| AAT.ATT       | 18 | 7556080  | 7556093  | 4.66667 | ENSSSCT00000017936 | KEL         | intron     | -0.365 | .            | 2 |
| AAC.GTT       | 18 | 7619682  | 7619698  | 5.66667 | .                  | .           | intergenic | -0.102 | rs791010246  | 2 |
| AC.GT         | 18 | 7633946  | 7633959  | 7       | .                  | .           | intergenic | 0.062  | .            | 3 |
| AAAAT.ATTTT   | 18 | 7828858  | 7828873  | 3.2     | .                  | .           | intergenic | .      | rs786849328  | 3 |
| AC.GT         | 18 | 7963707  | 7963720  | 7       | ENSSSCT00000017947 | .           | intron     | -0.291 | .            | 3 |
| AAAT.ATTT     | 18 | 8058835  | 8058850  | 4       | ENSSSCT00000017951 | .           | intron     | 0.145  | rs790760811  | 2 |
| AC.GT         | 18 | 8249421  | 8249441  | 10.5    | .                  | .           | intergenic | .      | rs788874354  | 2 |
| AT.AT         | 18 | 8302072  | 8302081  | 5       | .                  | .           | intergenic | -0.028 | rs786649124  | 2 |
| AC.GT         | 18 | 8323815  | 8323826  | 6       | .                  | .           | intergenic | -0.106 | .            | 2 |
| AATC.GATT     | 18 | 8336022  | 8336043  | 5.5     | .                  | .           | intergenic | 0.23   | rs788822990  | 2 |
| AAAC.GTTT     | 18 | 8382738  | 8382751  | 3.5     | ENSSSCT00000027750 | CLEC5A      | intron     | -0.152 | rs788897591  | 2 |
| AAAC.GTTT     | 18 | 8382738  | 8382751  | 3.5     | ENSSSCT00000031347 | CLEC5A      | intron     | -0.152 | rs788897591  | 2 |
| AGC.GCT       | 18 | 8446572  | 8446590  | 6.33333 | .                  | .           | intergenic | .      | rs7868119213 | 2 |
| AT.AT         | 18 | 8493780  | 8493798  | 9.5     | .                  | .           | intergenic | .      | rs787307952  | 3 |
| AAAC.GTTT     | 18 | 8686988  | 8687003  | 4       | ENSSSCT00000017956 | AGK         | intron     | -0.07  | rs7880131785 | 2 |
| AAAAG.CTTTT   | 18 | 9034596  | 9034616  | 4.2     | .                  | .           | intergenic | -0.2   | rs790585470  | 2 |
| AAGAG.CTCTT   | 18 | 9192972  | 9192990  | 3.8     | .                  | .           | intergenic | -0.034 | rs7910287691 | 2 |
| AG.CT         | 18 | 9330637  | 9330651  | 7.5     | .                  | .           | intergenic | 0.162  | rs789450604  | 2 |
| ACGC.GCGT     | 18 | 9369605  | 9369620  | 4       | .                  | .           | intergenic | 0.184  | rs693217313  | 2 |
| AAC.GTT       | 18 | 9408946  | 9408968  | 7.66667 | ENSSSCT00000014715 | MRPS33      | promoter   | 0.299  | rs792001318  | 2 |

|               |    |          |          |         |                    |         |            |        |        |             |        |   |
|---------------|----|----------|----------|---------|--------------------|---------|------------|--------|--------|-------------|--------|---|
| AC.GT         | 18 | 9515536  | 9515548  | 6.5     | .                  | .       | intergenic | .      | 457660 | rs7899      | 2      |   |
| AT.AT         | 18 | 9545131  | 9545140  | 5       | ENSSSCT00000017958 | BRAF    | intron     | 0.098  | .      | rs789967096 | 2      |   |
| AAAAT.ATTTT   | 18 | 9651380  | 9651399  | 4       | ENSSSCT00000017959 | NDUFB2  | intron     | .      | 197272 | rs7886      | 3      |   |
| AC.GT         | 18 | 9656100  | 9656112  | 6.5     | ENSSSCT00000017959 | NDUFB2  | promoter   | .      | .      | .           | 2      |   |
| AAAC.GTTT     | 18 | 9672151  | 9672174  | 6       | ENSSSCT00000017960 | ADCK2   | intron     | 0.058  | .      | rs788652574 | 2      |   |
| AAAC.GTTT     | 18 | 9672151  | 9672174  | 6       | ENSSSCT00000028640 | ADCK2   | intron     | 0.058  | .      | rs788652574 | 2      |   |
| AC.GT         | 18 | 9808556  | 9808567  | 6       | ENSSSCT00000017961 | DENND2A | intron     | .      | .      | rs791493396 | 2      |   |
| AC.GT         | 18 | 9873945  | 9873961  | 8.5     | .                  | .       | intergenic | -0.121 | .      | rs792750843 | 5      |   |
| AT.AT         | 18 | 10011874 | 10011884 | 5.5     | ENSSSCT00000031418 | .       | intron     | .      | .      | rs787946397 | 3      |   |
| AC.GT         | 18 | 10266855 | 10266868 | 7       | ENSSSCT00000017968 | TBXAS1  | intron     | -0.018 | .      | rs787946397 | 3      |   |
| AAAT.ATTT     | 18 | 10764279 | 10764302 | 6       | ENSSSCT00000017974 | .       | intron     | 0.119  | .      | rs789533051 | 2      |   |
| AAC.GTT       | 18 | 10783564 | 10783584 | 7       | ENSSSCT00000017974 | .       | intron     | .      | .      | rs786992638 | 4      |   |
| AAAAAC.GTTTTT | 18 | 10833424 | 10833450 | 4.5     | .                  | .       | intergenic | .      | .      | rs789123615 | 2      |   |
| AC.GT         | 18 | 11040499 | 11040517 | 9.5     | ENSSSCT00000017979 | ZAP     | intron     | -0.324 | .      | .           | 2      |   |
| AGG.CCT       | 18 | 11356634 | 11356656 | 7.66667 | .                  | .       | intergenic | .      | .      | rs789225819 | 2      |   |
| AAAT.ATTT     | 18 | 11473681 | 11473694 | 3.5     | ENSSSCT00000017985 | SVOPL   | intron     | -0.141 | .      | .           | 2      |   |
| AT.AT         | 18 | 11681229 | 11681244 | 8       | .                  | .       | intergenic | 0.14   | .      | rs791701801 | 2      |   |
| AAC.GTT       | 18 | 11695404 | 11695426 | 7.66667 | .                  | .       | intergenic | .      | .      | rs786349627 | 3      |   |
| AAAC.GTTT     | 18 | 11731638 | 11731656 | 4.75    | .                  | .       | intergenic | .      | .      | rs790886982 | 3      |   |
| AC.GT         | 18 | 12133802 | 12133814 | 6.5     | ENSSSCT00000017987 | .       | intron     | 0.074  | .      | .           | 2      |   |
| AAC.GTT       | 18 | 12178525 | 12178539 | 5       | .                  | .       | intergenic | .      | .      | rs729634    | rs7862 | 2 |
| AT.AT         | 18 | 12183751 | 12183764 | 7       | .                  | .       | intergenic | .      | .      | rs793593030 | 2      |   |
| AG.CT         | 18 | 12209006 | 12209024 | 9.5     | ENSSSCT00000017988 | CREB3L2 | intron     | 0.123  | .      | rs721569    | rs7129 | 3 |
| AAT.ATT       | 18 | 12316745 | 12316767 | 7.66667 | ENSSSCT00000017988 | CREB3L2 | intron     | 0.047  | .      | rs317536    | rs7893 | 2 |
| ATC.GAT       | 18 | 12408708 | 12408720 | 4.33333 | .                  | .       | intergenic | .      | .      | rs790356495 | 2      |   |
| AAAC.GTTT     | 18 | 12430275 | 12430285 | 5.5     | .                  | .       | intergenic | 0.023  | .      | .           | 4      |   |
| AAAAC.GTTTT   | 18 | 12585728 | 12585759 | 6.4     | .                  | .       | intergenic | -0.392 | .      | rs789710996 | 2      |   |
| AC.GT         | 18 | 13007554 | 13007566 | 6.5     | .                  | .       | intergenic | .      | .      | rs119184    | rs7877 | 4 |
| AT.AT         | 18 | 13088554 | 13088573 | 10      | .                  | .       | intergenic | -0.102 | .      | rs695885752 | 2      |   |
| AAC.GTT       | 18 | 13191777 | 13191792 | 5.33333 | .                  | .       | intergenic | -0.096 | .      | rs793021436 | 2      |   |
| AG.CT         | 18 | 13214442 | 13214451 | 5       | .                  | .       | intergenic | 0.007  | .      | .           | 3      |   |
| AAAAT.ATTTT   | 18 | 13585131 | 13585154 | 4.8     | .                  | .       | intergenic | .      | .      | rs789574354 | 2      |   |
| AG.CT         | 18 | 13713288 | 13713297 | 5       | .                  | .       | intergenic | -0.002 | .      | .           | 4      |   |
| AT.AT         | 18 | 13786441 | 13786451 | 5.5     | .                  | .       | intergenic | 0.073  | .      | rs286195    | rs7936 | 2 |
| AT.AT         | 18 | 13818325 | 13818335 | 5.5     | .                  | .       | intergenic | 0.023  | .      | rs320595    | rs7887 | 2 |
| AAC.GTT       | 18 | 14269860 | 14269874 | 5       | .                  | .       | intergenic | -0.367 | .      | rs791469655 | 2      |   |
| AT.AT         | 18 | 14306414 | 14306423 | 5       | ENSSSCT00000026748 | FAM180A | promoter   | -0.088 | .      | rs792507346 | 2      |   |
| ACAG.CTGT     | 18 | 14586922 | 14586939 | 4.5     | .                  | .       | intergenic | 0.124  | .      | .           | 2      |   |
| AC.GT         | 18 | 14801094 | 14801106 | 6.5     | .                  | .       | intergenic | 0.021  | .      | rs789085790 | 2      |   |
| AC.GT         | 18 | 14974833 | 14974845 | 6.5     | .                  | .       | intergenic | .      | .      | rs792223271 | 2      |   |
| AC.GT         | 18 | 14995444 | 14995456 | 6.5     | .                  | .       | intergenic | .      | .      | rs791594755 | 5      |   |
| AC.GT         | 18 | 15029288 | 15029300 | 6.5     | ENSSSCT00000017997 | AGBL3   | intron     | 2.151  | .      | rs789741943 | 4      |   |
| AAAC.GTTT     | 18 | 15041100 | 15041118 | 4.75    | ENSSSCT00000017997 | AGBL3   | intron     | .      | .      | rs316292    | rs7867 | 2 |
| AAAC.GTTT     | 18 | 15087385 | 15087403 | 4.75    | ENSSSCT00000027194 | CALD1   | intron     | 1.326  | .      | rs90023     | rs7866 | 2 |
| AAAC.GTTT     | 18 | 15087385 | 15087403 | 4.75    | ENSSSCT00000018005 | CALD1   | intron     | 1.326  | .      | rs90023     | rs7866 | 2 |
| AAAC.GTTT     | 18 | 15087385 | 15087403 | 4.75    | ENSSSCT00000031119 | CALD1   | intron     | 1.326  | .      | rs90023     | rs7866 | 2 |
| AT.AT         | 18 | 15111619 | 15111632 | 7       | ENSSSCT00000027194 | CALD1   | intron     | 0.153  | .      | rs263271    | rs7871 | 2 |
| AT.AT         | 18 | 15111619 | 15111632 | 7       | ENSSSCT00000018005 | CALD1   | intron     | 0.153  | .      | rs263271    | rs7871 | 2 |
| AT.AT         | 18 | 15111619 | 15111632 | 7       | ENSSSCT00000031119 | CALD1   | intron     | 0.153  | .      | rs263271    | rs7871 | 2 |
| AAAC.GTTT     | 18 | 15138225 | 15138243 | 4.75    | ENSSSCT00000027194 | CALD1   | intron     | 0.041  | .      | rs364583    | rs7883 | 2 |
| AAAC.GTTT     | 18 | 15138225 | 15138243 | 4.75    | ENSSSCT00000018005 | CALD1   | intron     | 0.041  | .      | rs364583    | rs7883 | 2 |
| AAAC.GTTT     | 18 | 15138225 | 15138243 | 4.75    | ENSSSCT00000031119 | CALD1   | intron     | 0.041  | .      | rs364583    | rs7883 | 2 |
| AC.GT         | 18 | 15140245 | 15140255 | 5.5     | ENSSSCT00000027194 | CALD1   | intron     | .      | .      | .           | 2      |   |
| AC.GT         | 18 | 15140245 | 15140255 | 5.5     | ENSSSCT00000018005 | CALD1   | intron     | .      | .      | .           | 2      |   |
| AC.GT         | 18 | 15140245 | 15140255 | 5.5     | ENSSSCT00000031119 | CALD1   | intron     | .      | .      | .           | 2      |   |
| AC.GT         | 18 | 15277391 | 15277403 | 6.5     | .                  | .       | intergenic | 0.16   | .      | rs316582    | rs7886 | 2 |
| ACTC.GAGT     | 18 | 15342632 | 15342647 | 4       | .                  | .       | intergenic | -0.021 | .      | .           | 2      |   |
| AAC.GTT       | 18 | 15495330 | 15495357 | 9.33333 | .                  | .       | intergenic | 0.102  | .      | rs384425    | rs7914 | 2 |
| AT.AT         | 18 | 15624252 | 15624261 | 5       | .                  | .       | intergenic | .      | .      | .           | 2      |   |
| AAAAAC.GTTTTT | 18 | 15826298 | 15826317 | 3.33333 | .                  | .       | intergenic | .      | .      | rs789383834 | 2      |   |
| AAAT.ATTT     | 18 | 15924495 | 15924519 | 6.25    | ENSSSCT00000018012 | LRGUK   | intron     | .      | .      | rs792788046 | 2      |   |
| AAAAC.GTTTT   | 18 | 15939248 | 15939277 | 6       | ENSSSCT00000018012 | LRGUK   | intron     | 0.115  | .      | .           | 2      |   |
| AAAG.CTTT     | 18 | 15944905 | 15944916 | 3       | ENSSSCT00000018012 | LRGUK   | intron     | -0.063 | .      | rs787967301 | 2      |   |
| AGAT.ATCT     | 18 | 15979491 | 15979529 | 9.75    | ENSSSCT00000018012 | LRGUK   | intron     | -0.217 | .      | rs787517879 | 2      |   |
| AATG.CATT     | 18 | 16100932 | 16100953 | 5.5     | ENSSSCT00000018013 | EXOC4   | intron     | 0.218  | .      | rs791781695 | 3      |   |
| AG.CT         | 18 | 16176162 | 16176174 | 6.5     | ENSSSCT00000018013 | EXOC4   | intron     | 0.035  | .      | rs791044847 | 2      |   |
| AT.AT         | 18 | 16200780 | 16200789 | 5       | ENSSSCT00000018013 | EXOC4   | intron     | 0.009  | .      | rs789019683 | 2      |   |
| AAC.GTT       | 18 | 16268540 | 16268552 | 4.33333 | ENSSSCT00000018013 | EXOC4   | intron     | 0.315  | .      | rs314616    | rs7914 | 3 |
| AG.CT         | 18 | 16529059 | 16529077 | 9.5     | .                  | .       | intergenic | 0.009  | .      | rs148311    | rs7871 | 4 |
| AAAC.GTTT     | 18 | 16669411 | 16669432 | 5.5     | .                  | .       | intergenic | .      | .      | rs793654091 | 2      |   |
| AC.GT         | 18 | 16790552 | 16790568 | 8.5     | .                  | .       | intergenic | .      | .      | rs128508    | rs7913 | 3 |
| AAGG.CCTT     | 18 | 16948823 | 16948836 | 3.5     | .                  | .       | intergenic | 0.051  | .      | .           | 2      |   |
| AAAG.CTTT     | 18 | 16987279 | 16987292 | 3.5     | .                  | .       | intergenic | .      | .      | rs786393401 | 2      |   |
| AATG.CATT     | 18 | 17025897 | 17025915 | 4.75    | .                  | .       | intergenic | -0.118 | .      | rs707096974 | 2      |   |
| AAACC.GGTTT   | 18 | 17034827 | 17034844 | 3       | .                  | .       | intergenic | 0.12   | .      | rs788290070 | 2      |   |
| AAAC.GTTT     | 18 | 17054362 | 17054376 | 3.75    | .                  | .       | intergenic | 0.267  | .      | rs792843385 | 2      |   |
| AT.AT         | 18 | 17067127 | 17067137 | 5.5     | .                  | .       | intergenic | -0.076 | .      | rs577427    | rs7936 | 2 |
| AC.GT         | 18 | 17180585 | 17180617 | 16.5    | ENSSSCT00000018015 | CHCHD3  | intron     | 0.197  | .      | rs792959729 | 3      |   |
| AAAT.ATTT     | 18 | 17227523 | 17227549 | 6.75    | ENSSSCT00000018015 | CHCHD3  | intron     | 0.461  | .      | .           | 2      |   |
| AAAC.GTTT     | 18 | 17237897 | 17237916 | 5       | ENSSSCT00000018015 | CHCHD3  | intron     | 0.03   | .      | rs790119189 | 2      |   |
| AGGG.CCCT     | 18 | 17256814 | 17256829 | 4       | ENSSSCT00000018015 | CHCHD3  | intron     | -0.156 | .      | rs342932    | rs7894 | 2 |
| ACAT.ATGT     | 18 | 17578640 | 17578656 | 4.25    | .                  | .       | intergenic | 0.096  | .      | rs787700919 | 2      |   |
| AAAT.ATTT     | 18 | 17854641 | 17854658 | 4.5     | .                  | .       | intergenic | .      | .      | rs788733363 | 3      |   |
| AC.GT         | 18 | 18007810 | 18007822 | 6.5     | .                  | .       | intergenic | 0.585  | .      | rs787382619 | 2      |   |

|             |    |          |          |         |                    |         |            |        |                 |   |
|-------------|----|----------|----------|---------|--------------------|---------|------------|--------|-----------------|---|
| AAAT.ATTT   | 18 | 18275612 | 18275625 | 3.5     | .                  | .       | intergenic | .      | rs786657237     | 2 |
| AAAG.CTTT   | 18 | 18347520 | 18347538 | 4.75    | .                  | .       | intergenic | .      | rs12772 rs7864  | 2 |
| AAC.GTT     | 18 | 18484913 | 18484929 | 5.66667 | .                  | .       | intergenic | -0.337 | rs793015349     | 3 |
| AC.GT       | 18 | 18546803 | 18546825 | 11.5    | ENSSSCT00000018018 | PODXL   | intron     | 0.183  | rs790815607     | 2 |
| AAAG.CTTT   | 18 | 18769771 | 18769785 | 3.75    | .                  | .       | intergenic | 0.464  | rs85954 rs7929  | 2 |
| AT.AT       | 18 | 19103849 | 19103858 | 5       | .                  | .       | intergenic | .      | rs791559372     | 3 |
| AGAT.ATCT   | 18 | 19206217 | 19206261 | 11.25   | .                  | .       | intergenic | 0.095  | rs791223942     | 2 |
| AAAC.GTTT   | 18 | 19256579 | 19256597 | 4.75    | ENSSSCT00000018023 | COPG2   | intron     | .      | rs711299152     | 2 |
| AAC.GTT     | 18 | 19376573 | 19376592 | 6.66667 | .                  | .       | intergenic | .      | rs95185 rs7910  | 2 |
| AAAAC.GTTTT | 18 | 19537135 | 19537151 | 3.4     | .                  | .       | intergenic | 0.038  | rs790320941     | 2 |
| AAAT.ATTT   | 18 | 19606730 | 19606750 | 5.25    | .                  | .       | intergenic | 0.289  | rs788783939     | 2 |
| ACAT.ATGT   | 18 | 19664674 | 19664696 | 5.75    | ENSSSCT00000018033 | .       | intron     | -0.005 | rs793366343     | 2 |
| AAAC.GTTT   | 18 | 19975020 | 19975039 | 5       | .                  | .       | intergenic | 0.9    | rs792972156     | 2 |
| AT.AT       | 18 | 20345161 | 20345172 | 6       | ENSSSCT00000018038 | AHCYL2  | intron     | 0.504  | rs786729614     | 2 |
| AT.AT       | 18 | 20401378 | 20401391 | 7       | ENSSSCT00000018038 | AHCYL2  | intron     | 0.294  | rs788822027     | 2 |
| AAAAC.GTTTT | 18 | 20457992 | 20458027 | 7.2     | ENSSSCT00000018038 | AHCYL2  | intron     | 0.253  | rs791774346     | 2 |
| AT.AT       | 18 | 20724401 | 20724412 | 6       | ENSSSCT00000018042 | TNPO3   | intron     | 1.418  | rs31878 rs7881  | 2 |
| AAAAT.ATTTT | 18 | 20954632 | 20954647 | 3.2     | ENSSSCT00000018054 | FAM71F1 | intron     | -0.013 | rs97226 rs7892  | 2 |
| AAAAG.CTTTT | 18 | 21010316 | 21010336 | 3.5     | .                  | .       | intergenic | .      | rs791968280     | 2 |
| AAAG.CTTT   | 18 | 21398271 | 21398284 | 3.5     | ENSSSCT00000018062 | SND1    | intron     | 0.043  | rs792404525     | 2 |
| AAAC.GTTT   | 18 | 21505735 | 21505762 | 7       | ENSSSCT00000018062 | SND1    | intron     | 0.3    | rs790339144     | 2 |
| AATC.GATT   | 18 | 21836773 | 21836794 | 5.5     | .                  | .       | intergenic | 0.094  | .               | 2 |
| AAG.CTT     | 18 | 21842932 | 21842947 | 5.33333 | .                  | .       | intergenic | 0.051  | rs789598817     | 2 |
| AAAAC.GTTTT | 18 | 21874892 | 21874906 | 3       | .                  | .       | intergenic | 0.262  | .               | 2 |
| AAAT.ATTT   | 18 | 21891012 | 21891036 | 6.25    | .                  | .       | intergenic | 0.052  | .               | 2 |
| AAAC.GTTT   | 18 | 22040422 | 22040441 | 5       | .                  | .       | intergenic | -0.24  | rs788575647     | 2 |
| AAAAT.ATTTT | 18 | 22058846 | 22058863 | 3.6     | .                  | .       | intergenic | 0.154  | rs786256687     | 2 |
| AT.AT       | 18 | 22113058 | 22113071 | 7       | .                  | .       | intergenic | 0.294  | rs256502 rs7929 | 2 |
| AC.GT       | 18 | 22347499 | 22347520 | 11      | .                  | .       | intergenic | 0.053  | rs342303 rs7886 | 2 |
| AAGG.CCTT   | 18 | 22522789 | 22522810 | 5.5     | .                  | .       | intergenic | 0.173  | rs790621780     | 2 |
| AAAT.ATTT   | 18 | 22592320 | 22592336 | 4.25    | .                  | .       | intergenic | -0.144 | rs789906304     | 2 |
| AT.AT       | 18 | 22593307 | 22593326 | 10      | .                  | .       | intergenic | -0.21  | rs787362769     | 2 |
| AAAT.ATTT   | 18 | 22749350 | 22749369 | 5       | ENSSSCT00000026245 | GRM8    | intron     | 0.036  | rs786491091     | 2 |
| AAT.ATT     | 18 | 22803112 | 22803134 | 7.66667 | ENSSSCT00000026245 | GRM8    | intron     | 0.246  | rs793249297     | 2 |
| AAG.CTT     | 18 | 22887199 | 22887211 | 4.33333 | ENSSSCT00000026245 | GRM8    | intron     | .      | rs792067490     | 2 |
| AAAAT.ATTTT | 18 | 22917324 | 22917343 | 4       | ENSSSCT00000026245 | GRM8    | intron     | .      | rs790663652     | 2 |
| AATC.GATT   | 18 | 22985712 | 22985734 | 5.75    | ENSSSCT00000026245 | GRM8    | intron     | 0.185  | rs788874775     | 2 |
| AAAC.GTTT   | 18 | 23072009 | 23072032 | 6       | ENSSSCT00000026245 | GRM8    | intron     | 0.142  | rs198947 rs7873 | 2 |
| AC.GT       | 18 | 23149358 | 23149368 | 5.5     | .                  | .       | intergenic | -0.016 | rs185946 rs7875 | 2 |
| AAAAC.GTTTT | 18 | 23237316 | 23237331 | 3.2     | .                  | .       | intergenic | 0.565  | rs169267 rs7937 | 2 |
| AAAC.GTTT   | 18 | 23346591 | 23346610 | 5       | .                  | .       | intergenic | .      | rs788445775     | 2 |
| AAT.ATT     | 18 | 23526755 | 23526777 | 7.66667 | .                  | .       | intergenic | -0.137 | rs787857474     | 2 |
| AAAC.GTTT   | 18 | 23601091 | 23601119 | 7.25    | .                  | .       | intergenic | -0.021 | rs787739093     | 2 |
| AAC.GTT     | 18 | 23724311 | 23724324 | 4.66667 | .                  | .       | intergenic | .      | rs369266 rs7935 | 2 |
| AG.CT       | 18 | 23749024 | 23749034 | 5.5     | .                  | .       | intergenic | .      | rs792108976     | 2 |
| AT.AT       | 18 | 24071976 | 24071992 | 8.5     | .                  | .       | intergenic | 0.255  | rs786340368     | 2 |
| AT.AT       | 18 | 24119864 | 24119883 | 10      | .                  | .       | intergenic | -0.06  | .               | 2 |
| AAAC.GTTT   | 18 | 24539082 | 24539107 | 6.5     | .                  | .       | intergenic | 0.134  | rs791486857     | 2 |
| AAAC.GTTT   | 18 | 24579230 | 24579248 | 4.75    | .                  | .       | intergenic | 0.239  | rs788360059     | 3 |
| AGGG.CCCT   | 18 | 24755641 | 24755663 | 5.75    | .                  | .       | intergenic | 0.467  | rs791035565     | 2 |
| AAAC.GTTT   | 18 | 24913534 | 24913548 | 3.75    | .                  | .       | intergenic | 0.074  | rs788344979     | 2 |
| ACAT.ATGT   | 18 | 25421890 | 25421903 | 3.5     | .                  | .       | intergenic | 0.168  | .               | 2 |
| AT.AT       | 18 | 25453027 | 25453062 | 18      | .                  | .       | intergenic | 0.144  | rs790257064     | 3 |
| AATT.AATT   | 18 | 25526529 | 25526548 | 5       | ENSSSCT00000018081 | IQUB    | intron     | 0.045  | rs786870143     | 2 |
| AAAG.CTTT   | 18 | 25549423 | 25549449 | 6.75    | ENSSSCT00000018081 | IQUB    | intron     | .      | rs148296 rs7864 | 2 |
| AC.GT       | 18 | 25567918 | 25567931 | 7       | .                  | .       | intergenic | .      | rs690070626     | 3 |
| AAAAC.GTTTT | 18 | 25727215 | 25727232 | 3       | .                  | .       | intergenic | 0.07   | rs91984 rs7871  | 2 |
| AAAC.GTTT   | 18 | 25760802 | 25760836 | 8.75    | ENSSSCT00000018083 | SLC13A1 | intron     | 0.054  | rs787687059     | 3 |
| AAAAC.GTTTT | 18 | 25777492 | 25777512 | 4.2     | ENSSSCT00000018083 | SLC13A1 | intron     | -0.099 | rs281221 rs7897 | 2 |
| AT.AT       | 18 | 25933392 | 25933401 | 5       | .                  | .       | intergenic | .      | .               | 4 |
| AC.GT       | 18 | 26462676 | 26462685 | 5       | ENSSSCT00000018085 | CADPS2  | intron     | 0.189  | rs160321 rs7902 | 2 |
| AG.CT       | 18 | 26484090 | 26484099 | 5       | .                  | .       | intergenic | 0.149  | .               | 2 |
| AAAT.ATTT   | 18 | 26509898 | 26509914 | 4.25    | .                  | .       | intergenic | -0.245 | rs789325119     | 2 |
| AATG.CATT   | 18 | 26802471 | 26802487 | 4.25    | .                  | .       | intergenic | 0.049  | rs356623 rs7899 | 2 |
| AAAC.GTTT   | 18 | 26976925 | 26976947 | 5.75    | .                  | .       | intergenic | 0.303  | rs787177690     | 2 |
| AC.GT       | 18 | 27014466 | 27014481 | 8       | .                  | .       | intergenic | 0.202  | rs789337720     | 2 |
| AAT.ATT     | 18 | 27090416 | 27090435 | 6.66667 | .                  | .       | intergenic | .      | .               | 2 |
| ACAG.CTGT   | 18 | 27182800 | 27182819 | 5       | ENSSSCT00000018090 | FAM3C   | intron     | -0.014 | rs788697225     | 2 |
| AG.CT       | 18 | 27261616 | 27261628 | 6.5     | ENSSSCT00000018092 | CPED1   | 3'utr      | 0.447  | rs787141374     | 2 |
| AC.GT       | 18 | 27460393 | 27460425 | 16.5    | ENSSSCT00000018092 | CPED1   | intron     | -0.022 | .               | 4 |
| AAAAC.GTTTT | 18 | 27518669 | 27518693 | 4.16667 | ENSSSCT00000018092 | CPED1   | intron     | 0.029  | rs787130159     | 2 |
| AG.CT       | 18 | 27609201 | 27609210 | 5       | .                  | .       | intergenic | .      | .               | 2 |
| AGG.CCT     | 18 | 27904824 | 27904835 | 4       | .                  | .       | intergenic | -0.165 | rs790873383     | 2 |
| AAAAC.GTTTT | 18 | 27933965 | 27933988 | 4       | .                  | .       | intergenic | 0.632  | rs372307 rs7866 | 2 |
| AAGG.CCTT   | 18 | 28016250 | 28016268 | 4.75    | .                  | .       | intergenic | 0.081  | rs789123284     | 2 |
| AAT.ATT     | 18 | 28128662 | 28128681 | 6.66667 | .                  | .       | intergenic | 0.186  | rs346547 rs7882 | 2 |
| AAC.GTT     | 18 | 28189778 | 28189805 | 9.33333 | .                  | .       | intergenic | 0.123  | .               | 2 |
| AAAT.ATTT   | 18 | 28601136 | 28601166 | 7.75    | .                  | .       | intergenic | .      | rs793331203     | 2 |
| AG.CT       | 18 | 28995095 | 28995104 | 5       | .                  | .       | intergenic | .      | .               | 3 |
| AC.GT       | 18 | 29227414 | 29227425 | 6       | .                  | .       | intergenic | 0.016  | .               | 2 |
| AAC.GTT     | 18 | 29256013 | 29256033 | 7       | .                  | .       | intergenic | .      | rs781304 rs7876 | 2 |
| GATAT.ATATC | 18 | 29478118 | 29478146 | 4.83333 | .                  | .       | intergenic | -0.081 | rs790656194     | 2 |
| AGG.CCT     | 18 | 29489216 | 29489232 | 5.66667 | .                  | .       | intergenic | 0.003  | rs787925493     | 2 |
| AAAC.GTTT   | 18 | 29613398 | 29613416 | 4.75    | .                  | .       | intergenic | .      | rs790396035     | 2 |

|             |    |          |          |         |                    |         |            |        |                  |   |
|-------------|----|----------|----------|---------|--------------------|---------|------------|--------|------------------|---|
| AAAC.GTTT   | 18 | 29872418 | 29872432 | 3.75    | .                  | .       | intergenic | 0.064  | rs790719667      | 2 |
| AAC.GTT     | 18 | 29886942 | 29886958 | 5.66667 | .                  | .       | intergenic | 0.101  | rs786704097      | 2 |
| AAGC.GCTT   | 18 | 29925496 | 29925513 | 4.5     | .                  | .       | intergenic | -0.028 | rs788076387      | 2 |
| AC.GT       | 18 | 30015962 | 30015982 | 10.5    | .                  | .       | intergenic | 0.128  | rs75816 rs7865   | 2 |
| AAAC.GTTT   | 18 | 30111118 | 30111137 | 5       | .                  | .       | intergenic | 0.02   | rs741162 rs7897  | 2 |
| AAAC.GTTT   | 18 | 30323447 | 30323465 | 4.75    | ENSSSCT00000018099 | CTTNBP2 | intron     | -0.073 | rs718706 rs7906  | 2 |
| AAAT.ATTT   | 18 | 30630290 | 30630310 | 5.25    | ENSSSCT00000018103 | .       | intron     | 0.177  | rs792793783      | 3 |
| AT.AT       | 18 | 30667954 | 30667968 | 7.5     | .                  | .       | intergenic | 0.214  | .                | 3 |
| AATG.CATT   | 18 | 30684276 | 30684293 | 4.5     | .                  | .       | intergenic | 0.495  | rs790712722      | 2 |
| AATC.GATT   | 18 | 31024968 | 31024995 | 7       | .                  | .       | intergenic | 0.198  | rs746336 rs7880  | 2 |
| ACAG.CTGT   | 18 | 31161136 | 31161156 | 5.25    | ENSSSCT00000018105 | ST7     | intron     | 0.232  | .                | 2 |
| AG.CT       | 18 | 31464147 | 31464159 | 6.5     | .                  | .       | intergenic | -0.044 | rs790774994      | 3 |
| AAC.GTT     | 18 | 31812705 | 31812734 | 10      | .                  | .       | intergenic | .      | rs758282 rs7910  | 4 |
| AAG.CTT     | 18 | 31932602 | 31932616 | 5       | .                  | .       | intergenic | .      | rs787182 rs7915  | 2 |
| AAAG.CTTT   | 18 | 32030134 | 32030162 | 7.25    | .                  | .       | intergenic | 0.106  | rs787749626      | 2 |
| AAAAT.ATTTT | 18 | 32233824 | 32233839 | 3.2     | ENSSSCT00000018115 | TFEC    | intron     | 0.008  | rs790937285      | 2 |
| AAAAT.ATTTT | 18 | 32233824 | 32233839 | 3.2     | ENSSSCT00000028328 | TFEC    | intron     | 0.008  | rs790937285      | 2 |
| AAAT.ATTT   | 18 | 32448761 | 32448781 | 5.25    | .                  | .       | intergenic | -0.008 | rs788461917      | 2 |
| AAAC.GTTT   | 18 | 32802941 | 32802955 | 3.75    | .                  | .       | intergenic | .      | rs790194149      | 2 |
| AG.CT       | 18 | 32859642 | 32859656 | 7.5     | .                  | .       | intergenic | -0.215 | .                | 2 |
| AAG.CTT     | 18 | 32867501 | 32867520 | 6.66667 | .                  | .       | intergenic | -0.051 | rs788322948      | 2 |
| AT.AT       | 18 | 33289759 | 33289770 | 6       | ENSSSCT00000018116 | MDFIC   | intron     | -0.134 | rs700069 rs7919  | 2 |
| AT.AT       | 18 | 33600130 | 33600139 | 5       | .                  | .       | intergenic | 0.282  | rs788370305      | 2 |
| AC.GT       | 18 | 33876928 | 33876947 | 10      | .                  | .       | intergenic | 0.933  | .                | 3 |
| AAAC.GTTT   | 18 | 33946419 | 33946441 | 5.75    | .                  | .       | intergenic | .      | rs791230733      | 2 |
| AAAC.GTTT   | 18 | 34276943 | 34276965 | 5.75    | .                  | .       | intergenic | 0.123  | rs789370903      | 2 |
| AAG.CTT     | 18 | 34308396 | 34308410 | 5       | .                  | .       | intergenic | -0.047 | .                | 2 |
| AAC.GTT     | 18 | 34391795 | 34391813 | 6.33333 | .                  | .       | intergenic | -0.2   | rs792070720      | 2 |
| AAAC.GTTT   | 18 | 34526024 | 34526054 | 7.75    | .                  | .       | intergenic | .      | .                | 3 |
| AC.GT       | 18 | 34530406 | 34530417 | 6       | .                  | .       | intergenic | 0.013  | .                | 3 |
| AAAC.GTGT   | 18 | 34634680 | 34634703 | 4       | .                  | .       | intergenic | .      | .                | 2 |
| AC.GT       | 18 | 34919230 | 34919250 | 10.5    | .                  | .       | intergenic | .      | rs788388944      | 2 |
| AAAC.GTTT   | 18 | 34920381 | 34920394 | 3.5     | .                  | .       | intergenic | -0.005 | rs791131532      | 2 |
| AAAAT.ATTTT | 18 | 35003756 | 35003776 | 4.2     | .                  | .       | intergenic | 0.161  | rs733296 rs7867  | 2 |
| AT.AT       | 18 | 35062064 | 35062077 | 7       | .                  | .       | intergenic | .      | rs792542328      | 2 |
| AAAC.GTTT   | 18 | 35182434 | 35182446 | 3.25    | .                  | .       | intergenic | .      | rs792846234      | 2 |
| AC.GT       | 18 | 35432138 | 35432149 | 6       | .                  | .       | intergenic | 0.991  | rs786320065      | 2 |
| AAAC.GTTT   | 18 | 35646018 | 35646047 | 7.5     | .                  | .       | intergenic | .      | rs792940498      | 2 |
| AAAT.ATTT   | 18 | 35780645 | 35780675 | 7.75    | .                  | .       | intergenic | 0.228  | .                | 2 |
| AAAC.GTTT   | 18 | 35804900 | 35804918 | 4.75    | .                  | .       | intergenic | .      | rs793217187      | 2 |
| AGC.GCT     | 18 | 35896563 | 35896582 | 6.66667 | .                  | .       | intergenic | -0.071 | rs790360418      | 2 |
| AC.GT       | 18 | 35922783 | 35922792 | 5       | ENSSSCT00000018124 | IFRD1   | intron     | 2.145  | rs789335076      | 2 |
| AAC.GTT     | 18 | 36246849 | 36246862 | 4.66667 | .                  | .       | intergenic | 0.198  | .                | 4 |
| AAC.GTT     | 18 | 36423451 | 36423465 | 5       | ENSSSCT00000029218 | .       | intron     | -0.09  | .                | 2 |
| AC.GT       | 18 | 36587845 | 36587859 | 7.5     | ENSSSCT00000029218 | .       | intron     | 0.03   | .                | 5 |
| AAAAC.GTTTT | 18 | 36605075 | 36605099 | 5       | ENSSSCT00000029218 | .       | intron     | 0.063  | rs792521377      | 2 |
| AC.GT       | 18 | 36620069 | 36620081 | 6.5     | ENSSSCT00000029218 | .       | intron     | .      | rs789596267      | 2 |
| AT.AT       | 18 | 36808358 | 36808368 | 5.5     | ENSSSCT00000018126 | .       | intron     | 0.096  | rs734550 rs7917  | 2 |
| AG.CT       | 18 | 36898294 | 36898303 | 5       | .                  | .       | intergenic | -0.147 | .                | 3 |
| AC.GT       | 18 | 36930633 | 36930642 | 5       | .                  | .       | intergenic | .      | .                | 2 |
| AAAC.GTTT   | 18 | 37139015 | 37139043 | 7.25    | .                  | .       | intergenic | 0.006  | rs792300511      | 3 |
| AAAG.CTTT   | 18 | 37230221 | 37230241 | 5.25    | .                  | .       | intergenic | 0.024  | rs792201652      | 2 |
| AAC.GTT     | 18 | 37279350 | 37279368 | 6.33333 | .                  | .       | intergenic | -0.035 | .                | 2 |
| AAG.CTT     | 18 | 37301080 | 37301093 | 4.66667 | .                  | .       | intergenic | 0.183  | rs7183477 rs7899 | 2 |
| AC.GT       | 18 | 37306998 | 37307007 | 5       | .                  | .       | intergenic | 0.041  | .                | 4 |
| AC.GT       | 18 | 37501176 | 37501187 | 6       | .                  | .       | intergenic | .      | rs792383278      | 4 |
| AAC.GTT     | 18 | 37504491 | 37504504 | 4.66667 | .                  | .       | intergenic | 0.453  | rs792437008      | 2 |
| AC.GT       | 18 | 37521026 | 37521037 | 6       | .                  | .       | intergenic | 0.086  | rs788743908      | 3 |
| AC.GT       | 18 | 37543188 | 37543207 | 10      | .                  | .       | intergenic | 0.067  | .                | 2 |
| AT.AT       | 18 | 37708105 | 37708115 | 5.5     | .                  | .       | intergenic | 0.015  | rs790473291      | 2 |
| AAAG.CTTT   | 18 | 37822343 | 37822361 | 4.75    | .                  | .       | intergenic | 0.151  | rs746474 rs7875  | 2 |
| AAAAC.GTTTT | 18 | 37894255 | 37894276 | 4.4     | .                  | .       | intergenic | .      | rs7206496 rs7898 | 2 |
| AG.CT       | 18 | 38083039 | 38083054 | 8       | .                  | .       | intergenic | -0.235 | rs791114981      | 3 |
| AAAC.GTTT   | 18 | 38157373 | 38157391 | 4.75    | .                  | .       | intergenic | .      | rs788211767      | 3 |
| AT.AT       | 18 | 38285947 | 38285960 | 7       | .                  | .       | intergenic | -0.051 | rs718419 rs7863  | 2 |
| AAAAT.ATTTT | 18 | 38313825 | 38313851 | 5.4     | .                  | .       | intergenic | 0.093  | rs746388 rs7881  | 2 |
| AAACC.GTTTT | 18 | 39287308 | 39287332 | 5       | .                  | .       | intergenic | .      | rs793242782      | 2 |
| AAAC.GTTT   | 18 | 39288314 | 39288333 | 5       | .                  | .       | intergenic | .      | rs792128 rs7923  | 2 |
| AG.CT       | 18 | 39551698 | 39551735 | 19      | .                  | .       | intergenic | 0.193  | rs77812 rs7895   | 2 |
| AAAC.GTTT   | 18 | 39557788 | 39557813 | 6.5     | .                  | .       | intergenic | 0.042  | rs743788 rs7864  | 2 |
| AAC.GTT     | 18 | 40254145 | 40254158 | 4.66667 | ENSSSCT00000018133 | GPR141  | promoter   | .      | rs790011778      | 2 |
| AC.GT       | 18 | 40292121 | 40292143 | 11.5    | .                  | .       | intergenic | -0.143 | rs790398189      | 2 |
| AC.GT       | 18 | 40432831 | 40432844 | 7       | .                  | .       | intergenic | 0.406  | rs738015 rs7869  | 4 |
| AC.GT       | 18 | 40521637 | 40521646 | 5       | .                  | .       | intergenic | 0.229  | rs70350 rs7900   | 3 |
| AT.AT       | 18 | 40633517 | 40633533 | 8.5     | ENSSSCT00000018134 | ELMO1   | intron     | -0.029 | rs786973053      | 4 |
| ACC.GGT     | 18 | 40736276 | 40736291 | 5.33333 | ENSSSCT00000018134 | ELMO1   | intron     | -0.132 | rs786508784      | 2 |
| AAAAC.GTTTT | 18 | 40741342 | 40741372 | 6.2     | ENSSSCT00000018134 | ELMO1   | intron     | 0.074  | rs791476967      | 2 |
| AC.GT       | 18 | 40973098 | 40973108 | 5.5     | ENSSSCT00000018134 | ELMO1   | intron     | -0.014 | rs792686180      | 2 |
| AG.CT       | 18 | 40979294 | 40979304 | 5.5     | ENSSSCT00000018134 | ELMO1   | intron     | -0.005 | .                | 2 |
| AC.GT       | 18 | 41120603 | 41120615 | 6.5     | ENSSSCT00000018135 | AOAH    | intron     | 0.16   | rs790618579      | 4 |
| AC.GT       | 18 | 41120603 | 41120615 | 6.5     | ENSSSCT00000034056 | AOAH    | intron     | 0.16   | rs790618579      | 4 |
| AC.GT       | 18 | 41120603 | 41120615 | 6.5     | ENSSSCT00000033857 | AOAH    | intron     | 0.16   | rs790618579      | 4 |
| AGG.CCT     | 18 | 41159443 | 41159457 | 5       | ENSSSCT00000018135 | AOAH    | intron     | -0.056 | rs703901 rs7901  | 2 |
| AGG.CCT     | 18 | 41159443 | 41159457 | 5       | ENSSSCT00000034056 | AOAH    | intron     | -0.056 | rs703901 rs7901  | 2 |

|               |    |          |          |         |                    |         |            |        |             |        |   |
|---------------|----|----------|----------|---------|--------------------|---------|------------|--------|-------------|--------|---|
| AGG.CCT       | 18 | 41159443 | 41159457 | 5       | ENSSSCT00000033857 | AOAH    | intron     | -0.056 | 303901      | rs7901 | 2 |
| AG.CT         | 18 | 41309361 | 41309373 | 6.5     | ENSSSCT00000018136 | ANLN    | intron     | .      | 141284      | rs7901 | 2 |
| AG.CT         | 18 | 41824018 | 41824027 | 5       | .                  | .       | intergenic | -0.15  | .           | .      | 2 |
| AT.AT         | 18 | 42184785 | 42184795 | 5.5     | .                  | .       | intergenic | -0.04  | rs792142099 | .      | 3 |
| AAAC.GTTT     | 18 | 42271215 | 42271230 | 4       | .                  | .       | intergenic | .      | 172634      | rs7895 | 2 |
| AAAC.GTTT     | 18 | 42280600 | 42280618 | 4.75    | .                  | .       | intergenic | 0.229  | rs792411311 | .      | 2 |
| AG.CT         | 18 | 42390871 | 42390889 | 9.5     | .                  | .       | intergenic | 0.11   | .           | .      | 4 |
| AT.AT         | 18 | 42752478 | 42752490 | 6.5     | .                  | .       | intergenic | -0.197 | rs790105413 | .      | 3 |
| AG.CT         | 18 | 43044777 | 43044788 | 6       | .                  | .       | intergenic | -0.183 | rs790040353 | .      | 2 |
| \CATAT.ATATG` | 18 | 43276654 | 43276678 | 4.16667 | ENSSSCT00000029081 | BMPER   | intron     | .      | 173135      | rs7924 | 2 |
| \CATAT.ATATG` | 18 | 43276654 | 43276678 | 4.16667 | ENSSSCT00000023205 | BMPER   | intron     | .      | 173135      | rs7924 | 2 |
| \CATAT.ATATG` | 18 | 43276654 | 43276678 | 4.16667 | ENSSSCT00000018144 | BMPER   | intron     | .      | 173135      | rs7924 | 2 |
| AC.GT         | 18 | 43334015 | 43334030 | 8       | ENSSSCT00000029081 | BMPER   | intron     | -0.096 | .           | .      | 4 |
| AC.GT         | 18 | 43334015 | 43334030 | 8       | ENSSSCT00000018144 | BMPER   | intron     | -0.096 | .           | .      | 4 |
| AAAG.CTTT     | 18 | 43390885 | 43390899 | 3.75    | ENSSSCT00000029081 | BMPER   | intron     | -0.123 | rs792186691 | .      | 2 |
| AAAG.CTTT     | 18 | 43390885 | 43390899 | 3.75    | ENSSSCT00000018144 | BMPER   | intron     | -0.123 | rs792186691 | .      | 2 |
| AG.CT         | 18 | 43667395 | 43667405 | 5.5     | .                  | .       | intergenic | 0.036  | rs786557169 | .      | 2 |
| AAAC.GTTT     | 18 | 44229762 | 44229773 | 3       | ENSSSCT00000031056 | .       | intron     | .      | rs786441937 | .      | 2 |
| AAC.GTT       | 18 | 44237336 | 44237351 | 5.33333 | ENSSSCT00000031056 | .       | intron     | 0.885  | rs790125169 | .      | 2 |
| AAC.GTT       | 18 | 44461584 | 44461607 | 8       | ENSSSCT00000029905 | FKBP9   | intron     | .      | rs789306961 | .      | 2 |
| AC.GT         | 18 | 44663759 | 44663776 | 9       | .                  | .       | intergenic | .      | 779460      | rs7904 | 2 |
| ACAG.CTGT     | 18 | 44696824 | 44696840 | 4.25    | .                  | .       | intergenic | 0.123  | rs786546632 | .      | 2 |
| AAAC.GTTT     | 18 | 44777341 | 44777357 | 4.25    | ENSSSCT00000029825 | AVL9    | intron     | .      | rs793190701 | .      | 2 |
| AG.CT         | 18 | 45102270 | 45102282 | 6.5     | .                  | .       | intergenic | 0.231  | .           | .      | 4 |
| AC.GT         | 18 | 45181860 | 45181869 | 5       | .                  | .       | intergenic | -0.001 | 352707      | rs7902 | 3 |
| AC.GT         | 18 | 45217985 | 45217995 | 5.5     | .                  | .       | intergenic | .      | .           | .      | 4 |
| ACCT.AGGT     | 18 | 45320825 | 45320843 | 4.75    | ENSSSCT00000018147 | PDE1C   | intron     | 0.216  | rs792269315 | .      | 2 |
| AAAC.GTTT     | 18 | 45358644 | 45358670 | 6.75    | ENSSSCT00000018147 | PDE1C   | intron     | .      | rs792754433 | .      | 2 |
| AC.GT         | 18 | 45415777 | 45415789 | 6.5     | ENSSSCT00000018147 | PDE1C   | intron     | 0.04   | rs786921455 | .      | 2 |
| AAAG.CTTT     | 18 | 45418941 | 45418958 | 4.5     | ENSSSCT00000018147 | PDE1C   | intron     | 0.212  | rs789816560 | .      | 2 |
| AAAAC.GTTTT   | 18 | 45751974 | 45751988 | 3       | ENSSSCT00000018150 | CCDC129 | intron     | -0.022 | 378414      | rs7869 | 2 |
| AAAAC.GTTTT   | 18 | 45751974 | 45751988 | 3       | ENSSSCT00000023430 | CCDC129 | intron     | -0.022 | 378414      | rs7869 | 2 |
| AC.GT         | 18 | 45792254 | 45792264 | 5.5     | .                  | .       | intergenic | 0.279  | .           | .      | 2 |
| AC.GT         | 18 | 46197853 | 46197878 | 13      | .                  | .       | intergenic | 0.018  | 585611      | rs7874 | 2 |
| AC.GT         | 18 | 46218315 | 46218325 | 5.5     | .                  | .       | intergenic | -0.095 | rs792809600 | .      | 2 |
| AAAAC.GTTTT   | 18 | 46683869 | 46683887 | 3.8     | ENSSSCT00000018157 | GARS    | intron     | 0.073  | rs792312282 | .      | 2 |
| AC.GT         | 18 | 46718588 | 46718598 | 5.5     | ENSSSCT00000018157 | GARS    | intron     | .      | .           | .      | 2 |
| AT.AT         | 18 | 47217851 | 47217861 | 5.5     | .                  | .       | intergenic | .      | rs790073913 | .      | 2 |
| AAAC.GTTT     | 18 | 47516901 | 47516927 | 6.75    | .                  | .       | intergenic | .      | rs791040824 | .      | 2 |
| AAAG.CTTT     | 18 | 47663217 | 47663231 | 3.75    | ENSSSCT00000018168 | CHN2    | intron     | -0.049 | .           | .      | 3 |
| AG.CT         | 18 | 47672723 | 47672738 | 8       | ENSSSCT00000018168 | CHN2    | intron     | 0.104  | .           | .      | 2 |
| AC.GT         | 18 | 47760927 | 47760936 | 5       | .                  | .       | intergenic | -0.185 | rs787229993 | .      | 2 |
| AAGG.CCTT     | 18 | 47951708 | 47951726 | 4.75    | .                  | .       | intergenic | 0.029  | rs789639921 | .      | 2 |
| AG.CT         | 18 | 48140879 | 48140893 | 7.5     | .                  | .       | intergenic | -0.175 | rs708248009 | .      | 4 |
| AAAC.GTTT     | 18 | 48141119 | 48141137 | 4.75    | .                  | .       | intergenic | -0.215 | 288535      | rs7892 | 3 |
| AAAC.GTTT     | 18 | 48264793 | 48264812 | 5       | ENSSSCT00000018171 | .       | intron     | 0.234  | rs791037364 | .      | 2 |
| AG.CT         | 18 | 48303959 | 48303971 | 6.5     | ENSSSCT00000018171 | .       | intron     | 0.423  | .           | .      | 3 |
| AAAAG.CTTTT   | 18 | 48307049 | 48307067 | 3.8     | ENSSSCT00000018171 | .       | intron     | 0.632  | .           | .      | 2 |
| AAAAC.GTTTT   | 18 | 48412067 | 48412091 | 5       | .                  | .       | intergenic | 0.427  | rs791409420 | .      | 2 |
| AG.CT         | 18 | 48704531 | 48704542 | 6       | .                  | .       | intergenic | -0.078 | 309101      | rs7867 | 2 |
| AAC.GTT       | 18 | 48883898 | 48883914 | 5.66667 | .                  | .       | intergenic | 0.149  | 126902      | rs7934 | 2 |
| AAAG.CTTT     | 18 | 48907320 | 48907336 | 4.25    | .                  | .       | intergenic | 0.505  | 240486      | rs7886 | 2 |
| AATG.CATT     | 18 | 49018039 | 49018061 | 5.75    | .                  | .       | intergenic | .      | .           | .      | 2 |
| AT.AT         | 18 | 49177399 | 49177409 | 5.5     | .                  | .       | intergenic | 0.005  | rs791422392 | .      | 2 |
| AATC.GATT     | 18 | 49191392 | 49191406 | 3.75    | .                  | .       | intergenic | -0.29  | rs792604424 | .      | 2 |
| AG.CT         | 18 | 49331976 | 49331985 | 5       | ENSSSCT00000036364 | TAX1BP1 | intron     | 1.121  | .           | .      | 2 |
| AAAAC.GTTTT   | 18 | 49350303 | 49350323 | 4.2     | ENSSSCT00000018173 | TAX1BP1 | intron     | .      | rs791389669 | .      | 2 |
| AAAAC.GTTTT   | 18 | 49350303 | 49350323 | 4.2     | ENSSSCT00000036364 | TAX1BP1 | intron     | .      | rs791389669 | .      | 2 |
| AAAC.GTTT     | 18 | 49415676 | 49415694 | 4.75    | .                  | .       | intergenic | 0.066  | 189896      | rs7915 | 2 |
| AAAC.GTTT     | 18 | 50240295 | 50240308 | 3.5     | .                  | .       | intergenic | 0.724  | rs788834182 | .      | 2 |
| AC.GT         | 18 | 50845451 | 50845461 | 5.5     | ENSSSCT00000018190 | SNX10   | intron     | 0.227  | rs788260148 | .      | 4 |
| AT.AT         | 18 | 50848764 | 50848782 | 9.5     | ENSSSCT00000018190 | SNX10   | intron     | 1.09   | .           | .      | 2 |
| AAAG.CTTT     | 18 | 51179199 | 51179211 | 3.25    | .                  | .       | intergenic | 0.012  | rs791682250 | .      | 2 |
| AAT.ATT       | 18 | 51192432 | 51192448 | 5.66667 | .                  | .       | intergenic | 0.396  | rs792335094 | .      | 2 |
| CACCC.GGGTC   | 18 | 51295986 | 51296009 | 4       | .                  | .       | intergenic | 0.706  | .           | .      | 2 |
| AT.AT         | 18 | 51357788 | 51357805 | 9       | .                  | .       | intergenic | .      | rs791248633 | .      | 2 |
| AG.CT         | 18 | 51606940 | 51606956 | 8.5     | .                  | .       | intergenic | -0.055 | rs791815901 | .      | 2 |
| AAGG.CCTT     | 18 | 51989080 | 51989101 | 5.5     | .                  | .       | intergenic | 0.215  | 728562      | rs7936 | 2 |
| AAC.GTT       | 18 | 52028181 | 52028197 | 5.66667 | .                  | .       | intergenic | .      | rs713405976 | .      | 2 |
| \AAAAC.GTTTT  | 18 | 52249930 | 52249949 | 3.33333 | .                  | .       | intergenic | -0.038 | 107354      | rs7919 | 2 |
| AC.GT         | 18 | 52342399 | 52342411 | 6.5     | ENSSSCT00000018196 | OSBPL3  | intron     | .      | 343916      | rs7886 | 2 |
| AC.GT         | 18 | 52342399 | 52342411 | 6.5     | ENSSSCT00000028478 | OSBPL3  | intron     | .      | 343916      | rs7886 | 2 |
| AC.GT         | 18 | 52342399 | 52342411 | 6.5     | ENSSSCT00000030453 | OSBPL3  | intron     | .      | 343916      | rs7886 | 2 |
| AAAAC.GTTTT   | 18 | 52438918 | 52438933 | 3.2     | ENSSSCT00000018197 | DFNA5   | intron     | .      | rs786929688 | .      | 2 |
| AC.GT         | 18 | 52576240 | 52576250 | 5.5     | ENSSSCT00000018198 | MPP6    | intron     | 0.39   | rs792289562 | .      | 2 |
| AAT.ATT       | 18 | 52814773 | 52814788 | 5.33333 | .                  | .       | intergenic | 0.047  | rs789291568 | .      | 2 |
| AG.CT         | 18 | 52927246 | 52927260 | 7.5     | .                  | .       | intergenic | 0.097  | rs787722910 | .      | 4 |
| AAAT.ATTT     | 18 | 53069861 | 53069878 | 4.5     | .                  | .       | intergenic | .      | 358498      | rs7881 | 2 |
| AG.CT         | 18 | 53092269 | 53092279 | 5.5     | .                  | .       | intergenic | 0.334  | rs787293934 | .      | 2 |
| AG.CT         | 18 | 53204158 | 53204167 | 5       | .                  | .       | intergenic | 0.187  | .           | .      | 2 |
| AC.GT         | 18 | 53307882 | 53307892 | 5.5     | ENSSSCT00000018200 | STK31   | intron     | 0.242  | 392971      | rs7871 | 2 |
| AAAC.GTTT     | 18 | 53310676 | 53310694 | 4.75    | ENSSSCT00000018200 | STK31   | intron     | .      | rs711574465 | .      | 2 |
| AAAG.CTTT     | 18 | 53473330 | 53473350 | 5.25    | .                  | .       | intergenic | .      | .           | .      | 2 |
| AAAT.ATTT     | 18 | 53502872 | 53502889 | 4.5     | .                  | .       | intergenic | .      | rs791410620 | .      | 2 |

|             |    |          |          |         |                    |          |            |        |                 |   |
|-------------|----|----------|----------|---------|--------------------|----------|------------|--------|-----------------|---|
| AC.GT       | 18 | 54171718 | 54171736 | 9.5     | .                  | .        | intergenic | .      | rs793722620     | 6 |
| AAAC.GTTT   | 18 | 54177831 | 54177849 | 4.75    | .                  | .        | intergenic | .      | rs165139 rs7886 | 3 |
| AC.GT       | 18 | 54559085 | 54559099 | 7.5     | .                  | .        | intergenic | -0.009 | rs791995221     | 4 |
| AAAAT.ATTTT | 18 | 54613180 | 54613194 | 3       | .                  | .        | intergenic | -0.214 | rs791360732     | 3 |
| AAAC.GTTT   | 18 | 54749453 | 54749475 | 5.75    | .                  | .        | intergenic | .      | rs788538873     | 2 |
| AACC.GGTT   | 18 | 54868455 | 54868476 | 5.5     | ENSSSCT00000018209 | IGFBP1   | promoter   | .      | rs351300 rs7890 | 2 |
| AGC.GCT     | 18 | 55063082 | 55063094 | 4.33333 | .                  | .        | intergenic | .      | rs789731776     | 2 |
| AC.GT       | 18 | 55080555 | 55080566 | 6       | .                  | .        | intergenic | -0.47  | .               | 2 |
| AC.GT       | 18 | 55097381 | 55097410 | 15      | .                  | .        | intergenic | .      | rs788862386     | 2 |
| AAAC.GTT    | 18 | 55270490 | 55270515 | 8.66667 | .                  | .        | intergenic | .      | rs760458 rs7912 | 3 |
| AAAG.CTTT   | 18 | 55300118 | 55300141 | 6       | .                  | .        | intergenic | -0.244 | rs792309624     | 2 |
| AT.AT       | 18 | 55324387 | 55324396 | 5       | .                  | .        | intergenic | 0.197  | rs789547807     | 3 |
| AAAAC.GTTTT | 18 | 55330252 | 55330270 | 3.8     | .                  | .        | intergenic | 0.225  | rs125092 rs7896 | 2 |
| AAAG.CTTT   | 18 | 55655281 | 55655304 | 6       | ENSSSCT00000018228 | NPC1L1   | intron     | 0.04   | rs791733617     | 2 |
| AAC.GTT     | 18 | 55862960 | 55862975 | 5.33333 | ENSSSCT00000018232 | YKT6     | intron     | 0.157  | .               | 2 |
| AAAG.CTTT   | 18 | 55883948 | 55883965 | 4.5     | .                  | .        | intergenic | .      | rs790607305     | 2 |
| AT.AT       | 18 | 56121758 | 56121768 | 5.5     | .                  | .        | intergenic | 0.155  | .               | 3 |
| AAAT.ATTT   | 18 | 56139399 | 56139414 | 4       | .                  | .        | intergenic | .      | rs789429860     | 2 |
| AAAC.GTTT   | 18 | 56338189 | 56338207 | 4.75    | ENSSSCT00000018242 | HECW1    | intron     | 0.047  | rs167144 rs7868 | 2 |
| AT.AT       | 18 | 56344021 | 56344030 | 5       | ENSSSCT00000018242 | HECW1    | intron     | 0.147  | .               | 2 |
| AAAC.GTTT   | 18 | 56662106 | 56662126 | 5.25    | .                  | .        | intergenic | 0.135  | .               | 2 |
| AAAAT.ATTTT | 18 | 56746489 | 56746509 | 4.2     | .                  | .        | intergenic | 0.2    | rs787812786     | 2 |
| AC.GT       | 18 | 57144526 | 57144535 | 5       | .                  | .        | intergenic | 0.276  | rs787740260     | 3 |
| AAT.ATT     | 18 | 57219453 | 57219471 | 6.33333 | .                  | .        | intergenic | -0.101 | rs792919394     | 2 |
| AAAT.ATTT   | 18 | 57238571 | 57238585 | 3.75    | .                  | .        | intergenic | -0.405 | rs791033246     | 2 |
| AAAC.GTTT   | 18 | 57650571 | 57650593 | 5.75    | ENSSSCT00000018246 | .        | intron     | 0.961  | rs792864559     | 2 |
| AG.CT       | 18 | 57920861 | 57920875 | 7.5     | .                  | .        | intergenic | -0.051 | rs787116408     | 4 |
| AAAT.ATTT   | 18 | 57931973 | 57931995 | 5.75    | .                  | .        | intergenic | -0.054 | rs788273724     | 2 |
| AAT.ATT     | 18 | 58075328 | 58075344 | 5.66667 | .                  | .        | intergenic | 0.047  | rs786345258     | 3 |
| AC.GT       | 18 | 58082080 | 58082093 | 7       | .                  | .        | intergenic | -0.01  | rs789033654     | 3 |
| AAAC.GTTT   | 18 | 58100859 | 58100875 | 4.25    | .                  | .        | intergenic | 0.344  | rs792729950     | 2 |
| AAAG.CTTT   | 18 | 58102093 | 58102110 | 4.5     | .                  | .        | intergenic | 0.02   | rs792532763     | 2 |
| AC.GT       | 18 | 58168203 | 58168213 | 5.5     | .                  | .        | intergenic | -0.025 | rs791233820     | 2 |
| AC.GT       | 18 | 58352888 | 58352906 | 9.5     | .                  | .        | intergenic | 0.134  | .               | 3 |
| AAT.ATT     | 18 | 58764277 | 58764296 | 6.66667 | .                  | .        | intergenic | .      | rs792582410     | 2 |
| AAAT.ATTT   | 18 | 58770041 | 58770058 | 4.5     | .                  | .        | intergenic | .      | .               | 2 |
| AAAC.GTTT   | 18 | 58775118 | 58775132 | 3.75    | .                  | .        | intergenic | .      | rs150404 rs7912 | 2 |
| AAGG.CCTT   | 18 | 58988461 | 58988499 | 9.75    | .                  | .        | intergenic | .      | rs786808874     | 2 |
| AC.GT       | 18 | 59075823 | 59075858 | 18      | .                  | .        | intergenic | 0.748  | rs791622845     | 2 |
| AC.GT       | 18 | 59676748 | 59676757 | 5       | ENSSSCT00000018255 | CDK13    | intron     | .      | rs788510794     | 2 |
| AAAC.GTTT   | 18 | 59684163 | 59684176 | 3.5     | ENSSSCT00000018255 | CDK13    | intron     | .      | rs789784177     | 2 |
| AC.GT       | 18 | 59983698 | 59983720 | 11.5    | .                  | .        | intergenic | 0.132  | rs793197482     | 2 |
| AC.GT       | 18 | 60176643 | 60176662 | 10      | .                  | .        | intergenic | 0.17   | .               | 3 |
| AC.GT       | 18 | 60225079 | 60225093 | 7.5     | .                  | .        | intergenic | 0.026  | rs360359 rs7894 | 4 |
| AAAG.CTTT   | 18 | 60228659 | 60228678 | 5       | .                  | .        | intergenic | -0.165 | rs791535772     | 2 |
| AAAC.GTTT   | 2  | 278001   | 278028   | 7       | .                  | .        | intergenic | .      | rs364810 rs7917 | 2 |
| AAAC.GTTT   | 2  | 767768   | 767787   | 5       | .                  | .        | intergenic | .      | rs103490 rs7899 | 2 |
| AC.GT       | 2  | 840398   | 840417   | 10      | .                  | .        | intergenic | .      | rs311180 rs7916 | 2 |
| AAAG.CTTT   | 2  | 1993925  | 1993952  | 7       | .                  | .        | intergenic | .      | rs790023774     | 2 |
| AT.AT       | 2  | 2184000  | 2184009  | 5       | .                  | .        | intergenic | -0.11  | .               | 2 |
| AAAAC.CTTTT | 2  | 2219186  | 2219208  | 4.6     | .                  | .        | intergenic | .      | rs787235985     | 2 |
| AT.AT       | 2  | 2234711  | 2234721  | 5.5     | .                  | .        | intergenic | -0.454 | rs786901894     | 2 |
| AGGG.CCCT   | 2  | 2609038  | 2609049  | 3       | .                  | .        | intergenic | -0.487 | rs787531496     | 2 |
| AAAT.ATTT   | 2  | 2812237  | 2812267  | 7.75    | .                  | .        | intergenic | -0.16  | .               | 2 |
| AC.GT       | 2  | 2999742  | 2999751  | 5       | ENSSSCT00000014085 | PPP6R3   | intron     | -0.211 | .               | 3 |
| AAAAC.GTTTT | 2  | 3771094  | 3771117  | 4.8     | .                  | .        | intergenic | .      | rs790131631     | 2 |
| AAAC.GTTT   | 2  | 3837290  | 3837313  | 6       | ENSSSCT00000014115 | TBC1D10C | 5'utr      | 0.211  | rs790893342     | 2 |
| AAAC.GTTT   | 2  | 3837290  | 3837313  | 6       | ENSSSCT00000014116 | PPP1CA   | promoter   | 0.211  | rs790893342     | 2 |
| AAAC.GTTT   | 2  | 3952495  | 3952512  | 4.5     | .                  | .        | intergenic | 0.178  | rs788800834     | 2 |
| AAC.GTT     | 2  | 5253017  | 5253032  | 5.33333 | .                  | .        | intergenic | .      | rs791406695     | 2 |
| AC.GT       | 2  | 5530131  | 5530142  | 6       | .                  | .        | intergenic | .      | .               | 3 |
| AAAC.GTTT   | 2  | 6170322  | 6170337  | 4       | .                  | .        | intergenic | .      | rs322689 rs7895 | 2 |
| AAC.GTT     | 2  | 6392603  | 6392640  | 12.6667 | ENSSSCT00000026889 | ATG2A    | promoter   | 0.036  | rs341086 rs7893 | 2 |
| AC.GT       | 2  | 6592145  | 6592155  | 5.5     | ENSSSCT00000014237 | NRXN2    | intron     | 0.061  | rs789225295     | 4 |
| AAAC.GTTT   | 2  | 6839535  | 6839554  | 5       | .                  | .        | intergenic | .      | rs327488 rs7887 | 2 |
| AT.AT       | 2  | 7997666  | 7997677  | 6       | .                  | .        | intergenic | .      | rs791382855     | 2 |
| AC.GT       | 2  | 8013935  | 8013946  | 6       | ENSSSCT00000024497 | .        | intron     | -0.445 | rs791202983     | 6 |
| AAG.CTT     | 2  | 8016903  | 8016927  | 8.33333 | ENSSSCT00000024497 | .        | promoter   | .      | rs786732840     | 2 |
| AAC.GTT     | 2  | 8207683  | 8207703  | 7       | .                  | .        | intergenic | -0.088 | rs789759580     | 2 |
| AAAAC.GTTTT | 2  | 8404150  | 8404170  | 3.5     | ENSSSCT00000025488 | BSCL2    | intron     | -0.056 | rs789499543     | 2 |
| AGG.CCT     | 2  | 8985691  | 8985705  | 5       | ENSSSCT00000015890 | .        | intron     | 3.292  | .               | 2 |
| AAC.GTT     | 2  | 9438228  | 9438239  | 4       | .                  | .        | intergenic | .      | rs340625 rs7879 | 2 |
| AGG.CCT     | 2  | 9718112  | 9718128  | 5.66667 | ENSSSCT00000014314 | DDB1     | promoter   | -0.206 | rs788596908     | 2 |
| AGG.CCT     | 2  | 9718112  | 9718128  | 5.66667 | ENSSSCT00000014305 | DAK      | promoter   | -0.206 | rs788596908     | 2 |
| AG.CT       | 2  | 9981197  | 9981206  | 5       | .                  | .        | intergenic | .      | rs793875049     | 2 |
| AAC.GTT     | 2  | 11710722 | 11710742 | 7       | .                  | .        | intergenic | .      | rs118469 rs7928 | 2 |
| AAAC.GTTT   | 2  | 11818832 | 11818851 | 5       | ENSSSCT00000014365 | DTX4     | intron     | -0.023 | rs787285194     | 2 |
| AAAC.GTTT   | 2  | 11931366 | 11931404 | 9.75    | .                  | .        | intergenic | -0.59  | rs722318 rs7921 | 2 |
| AAAC.GTTT   | 2  | 12176429 | 12176444 | 4       | .                  | .        | intergenic | .      | rs791191782     | 2 |
| AT.AT       | 2  | 12176612 | 12176638 | 13.5    | .                  | .        | intergenic | 0.318  | rs794714 rs7899 | 2 |
| AAC.GTT     | 2  | 12245337 | 12245369 | 11      | .                  | .        | intergenic | -0.086 | rs376231 rs7897 | 2 |
| AAT.ATT     | 2  | 12617796 | 12617812 | 5.66667 | ENSSSCT00000014390 | OR6Q1    | promoter   | -0.184 | rs789362561     | 2 |
| AG.CT       | 2  | 12654047 | 12654062 | 8       | .                  | .        | intergenic | .      | rs791793108     | 3 |
| AAAAC.GTTTT | 2  | 12899137 | 12899155 | 3.8     | ENSSSCT00000014398 | ZDHC5    | intron     | 0.382  | rs326449 rs7938 | 2 |



|             |   |          |          |         |                    |          |            |        |                 |   |
|-------------|---|----------|----------|---------|--------------------|----------|------------|--------|-----------------|---|
| AT.AT       | 2 | 12937922 | 12937931 | 5       | .                  | .        | intergenic | 0.194  | rs790475174     | 2 |
| AGCCC.GGGCT | 2 | 12939678 | 12939692 | 3       | .                  | .        | intergenic | 0.15   | rs787171033     | 2 |
| AAAT.ATTT   | 2 | 13100893 | 13100910 | 4.5     | .                  | .        | intergenic | .      | rs793849082     | 2 |
| ACAG.CTGT   | 2 | 13633030 | 13633048 | 4.75    | .                  | .        | intergenic | -0.249 | rs793513735     | 2 |
| AT.AT       | 2 | 13639999 | 13640010 | 6       | .                  | .        | intergenic | -0.181 | rs45041 rs7911  | 2 |
| AC.GT       | 2 | 13807177 | 13807187 | 5.5     | .                  | .        | intergenic | 0.034  | rs787183856     | 3 |
| AAAT.ATTT   | 2 | 13826658 | 13826669 | 3       | .                  | .        | intergenic | 0.091  | .               | 2 |
| AG.CT       | 2 | 14305857 | 14305881 | 12.5    | .                  | .        | intergenic | .      | .               | 4 |
| AT.AT       | 2 | 14758476 | 14758487 | 6       | .                  | .        | intergenic | .      | rs792448497     | 2 |
| AATT.AATT   | 2 | 15007497 | 15007511 | 3.75    | .                  | .        | intergenic | .      | .               | 2 |
| AC.GT       | 2 | 15178808 | 15178821 | 7       | .                  | .        | intergenic | .      | rs389546 rs7910 | 2 |
| AAT.ATT     | 2 | 15368445 | 15368460 | 5.33333 | .                  | .        | intergenic | .      | .               | 2 |
| AAC.GTT     | 2 | 15395978 | 15395994 | 5.66667 | .                  | .        | intergenic | .      | rs300987 rs7875 | 2 |
| AC.GT       | 2 | 16476170 | 16476181 | 6       | ENSSSCT00000014456 | MYBPC3   | 3'utr      | -0.075 | rs790142520     | 2 |
| AAAAG.CTTTT | 2 | 16642783 | 16642806 | 4       | ENSSSCT00000014466 | .        | intron     | 0.178  | rs199734 rs7863 | 2 |
| AAAT.ATTT   | 2 | 16711323 | 16711343 | 5.25    | ENSSSCT00000014466 | .        | intron     | .      | rs788694041     | 2 |
| AT.AT       | 2 | 16768766 | 16768776 | 5.5     | ENSSSCT00000014466 | .        | intron     | .      | rs790199661     | 2 |
| AAG.CTT     | 2 | 16808589 | 16808602 | 4.66667 | ENSSSCT00000014466 | .        | intron     | 0.226  | .               | 2 |
| AC.GT       | 2 | 17126872 | 17126881 | 5       | ENSSSCT00000014469 | CKAP5    | intron     | .      | rs787588165     | 2 |
| AG.CT       | 2 | 17657161 | 17657189 | 14.5    | .                  | .        | intergenic | 0.085  | rs790618398     | 2 |
| AAAAT.ATTTT | 2 | 17847703 | 17847725 | 4.6     | .                  | .        | intergenic | 0.284  | rs792542651     | 2 |
| AAC.GTT     | 2 | 18637232 | 18637247 | 5.33333 | ENSSSCT00000014499 | SYT13    | 3'utr      | -0.151 | rs311148 rs7867 | 2 |
| AG.CT       | 2 | 19058799 | 19058811 | 6.5     | .                  | .        | intergenic | -0.26  | .               | 2 |
| AC.GT       | 2 | 19125574 | 19125589 | 8       | .                  | .        | intergenic | -0.167 | rs792388820     | 2 |
| AAAAC.GTTTT | 2 | 19431722 | 19431750 | 5.8     | .                  | .        | intergenic | -0.085 | rs791650122     | 2 |
| AAAG.CTT    | 2 | 19489753 | 19489764 | 6       | .                  | .        | intergenic | -0.011 | rs787286974     | 2 |
| AAAAC.GTTTT | 2 | 19528946 | 19528965 | 4       | .                  | .        | intergenic | -0.196 | rs792382232     | 2 |
| AG.CT       | 2 | 19670762 | 19670772 | 5.5     | .                  | .        | intergenic | -0.518 | rs791048266     | 2 |
| AAAC.GTTT   | 2 | 19768046 | 19768069 | 6       | ENSSSCT00000014505 | EXT2     | intron     | 0.129  | rs793521412     | 2 |
| AAAC.GTTT   | 2 | 20145865 | 20145879 | 3.75    | ENSSSCT00000027104 | HSD17B12 | intron     | -0.128 | rs790892673     | 2 |
| AAAC.GTTT   | 2 | 20145865 | 20145879 | 3.75    | ENSSSCT00000031374 | HSD17B12 | intron     | -0.128 | rs790892673     | 2 |
| AAAC.GTTT   | 2 | 20195213 | 20195229 | 4.25    | ENSSSCT00000027104 | HSD17B12 | intron     | 1.138  | rs791328046     | 2 |
| AAAC.GTTT   | 2 | 20195213 | 20195229 | 4.25    | ENSSSCT00000031374 | HSD17B12 | intron     | 1.138  | rs791328046     | 2 |
| AAAAC.GTTTT | 2 | 20275035 | 20275062 | 5.6     | .                  | .        | intergenic | .      | rs398695 rs7865 | 3 |
| AC.GT       | 2 | 20278841 | 20278853 | 6.5     | .                  | .        | intergenic | .      | rs792326767     | 2 |
| AAAC.GTTT   | 2 | 20542414 | 20542428 | 3.75    | ENSSSCT00000014508 | TTC17    | intron     | 0.01   | rs789043360     | 2 |
| AAC.GTT     | 2 | 20647405 | 20647427 | 7.66667 | ENSSSCT00000014508 | TTC17    | intron     | 0.191  | rs269465 rs7868 | 3 |
| AAAC.GTTT   | 2 | 20709009 | 20709035 | 6.75    | .                  | .        | intergenic | -0.13  | rs792226030     | 2 |
| AAAC.GTTT   | 2 | 20792860 | 20792874 | 3.75    | .                  | .        | intergenic | .      | rs364387 rs7864 | 2 |
| AC.GT       | 2 | 20844818 | 20844838 | 10.5    | .                  | .        | intergenic | 0.573  | rs394316 rs7872 | 4 |
| AAAT.ATTT   | 2 | 21402505 | 21402527 | 5.75    | .                  | .        | intergenic | .      | rs786611707     | 2 |
| AAAG.CTTT   | 2 | 21521115 | 21521127 | 3.25    | .                  | .        | intergenic | -0.149 | rs793606615     | 2 |
| AAAAC.GTTTT | 2 | 21539685 | 21539718 | 6.8     | .                  | .        | intergenic | 0.069  | rs786955211     | 2 |
| AAC.GTT     | 2 | 21656216 | 21656233 | 6       | .                  | .        | intergenic | -0.019 | rs791240347     | 2 |
| ACAGC.GCTGT | 2 | 21728568 | 21728602 | 7       | .                  | .        | intergenic | -0.298 | .               | 2 |
| ACAT.ATGT   | 2 | 21735197 | 21735216 | 5       | .                  | .        | intergenic | -0.163 | rs792038706     | 2 |
| AG.CT       | 2 | 21904530 | 21904542 | 6.5     | .                  | .        | intergenic | -0.15  | rs308769 rs7880 | 3 |
| AAAG.CTTT   | 2 | 22263244 | 22263260 | 4.25    | .                  | .        | intergenic | -0.223 | rs781074 rs7912 | 2 |
| AGC.GCT     | 2 | 22323137 | 22323150 | 4.66667 | .                  | .        | intergenic | .      | rs700519962     | 2 |
| AC.GT       | 2 | 22325849 | 22325861 | 6.5     | .                  | .        | intergenic | .      | rs789848479     | 2 |
| AG.CT       | 2 | 22330315 | 22330326 | 6       | .                  | .        | intergenic | -0.167 | rs789212618     | 3 |
| AC.GT       | 2 | 22347604 | 22347624 | 10.5    | .                  | .        | intergenic | 0.336  | rs792052065     | 2 |
| AAAC.GTTT   | 2 | 22398311 | 22398330 | 5       | .                  | .        | intergenic | -0.069 | rs308784 rs7915 | 3 |
| AAG.CTT     | 2 | 22544666 | 22544680 | 5       | .                  | .        | intergenic | 0.141  | rs783026 rs7887 | 3 |
| AG.CT       | 2 | 22565814 | 22565826 | 6.5     | .                  | .        | intergenic | -0.152 | rs788693119     | 2 |
| AAGG.CCTT   | 2 | 22642282 | 22642300 | 4.75    | .                  | .        | intergenic | 0.033  | rs793463545     | 2 |
| AT.AT       | 2 | 22784452 | 22784479 | 14      | .                  | .        | intergenic | .      | .               | 2 |
| AC.GT       | 2 | 22966435 | 22966454 | 10      | .                  | .        | intergenic | -0.074 | rs787785885     | 3 |
| AT.AT       | 2 | 22974074 | 22974085 | 6       | .                  | .        | intergenic | .      | .               | 2 |
| AC.GT       | 2 | 23100531 | 23100541 | 5.5     | .                  | .        | intergenic | 0.076  | rs696331745     | 2 |
| AAGG.CCTT   | 2 | 23167309 | 23167331 | 5.75    | .                  | .        | intergenic | -0.109 | rs787559129     | 2 |
| AAAC.GTTT   | 2 | 23169608 | 23169622 | 3.75    | .                  | .        | intergenic | .      | rs788529504     | 2 |
| AC.GT       | 2 | 23232549 | 23232565 | 8.5     | .                  | .        | intergenic | .      | rs370413 rs7907 | 4 |
| AAAC.GTTT   | 2 | 23358454 | 23358472 | 4.75    | .                  | .        | intergenic | -0.158 | rs372056 rs7864 | 2 |
| AAAG.CTTT   | 2 | 23472939 | 23472954 | 4       | .                  | .        | intergenic | 0.065  | rs354175 rs7900 | 2 |
| AAAT.ATTT   | 2 | 23484991 | 23485014 | 6       | ENSSSCT00000010323 | .        | promoter   | 0.158  | rs793219963     | 2 |
| AGGG.CCCT   | 2 | 23487958 | 23487972 | 3.75    | .                  | .        | intergenic | 0.284  | rs702363069     | 2 |
| AG.CT       | 2 | 23543154 | 23543164 | 5.5     | .                  | .        | intergenic | 0.635  | rs387726 rs7887 | 2 |
| AAAC.GTTT   | 2 | 23647672 | 23647693 | 5.5     | .                  | .        | intergenic | .      | rs793634634     | 2 |
| AAAC.GTTT   | 2 | 23722325 | 23722352 | 7       | .                  | .        | intergenic | 0.051  | rs398546 rs7930 | 3 |
| AAC.GTT     | 2 | 23811409 | 23811422 | 4.66667 | .                  | .        | intergenic | -0.069 | rs791919475     | 2 |
| AAAT.ATTT   | 2 | 23816030 | 23816056 | 6.75    | .                  | .        | intergenic | 0.001  | rs362475 rs7887 | 2 |
| AAAC.GTTT   | 2 | 23836000 | 23836030 | 7.75    | .                  | .        | intergenic | 0.401  | rs793284283     | 2 |
| AAT.ATT     | 2 | 24009611 | 24009643 | 11      | .                  | .        | intergenic | -0.042 | rs319723 rs7914 | 2 |
| AC.GT       | 2 | 24021898 | 24021916 | 9.5     | .                  | .        | intergenic | -0.171 | .               | 4 |
| ACAT.ATGT   | 2 | 24065004 | 24065025 | 5.5     | .                  | .        | intergenic | .      | rs375736 rs7899 | 2 |
| AAC.GTT     | 2 | 24065958 | 24065971 | 4.66667 | .                  | .        | intergenic | .      | rs290484 rs7891 | 2 |
| AC.GT       | 2 | 24111063 | 24111074 | 6       | .                  | .        | intergenic | .      | .               | 4 |
| AAAT.ATTT   | 2 | 24177542 | 24177564 | 5.75    | .                  | .        | intergenic | 0.258  | .               | 3 |
| ACAG.CTGT   | 2 | 24203252 | 24203274 | 5.75    | .                  | .        | intergenic | -0.241 | rs369302 rs7900 | 2 |
| AT.AT       | 2 | 24285149 | 24285180 | 16      | .                  | .        | intergenic | -0.031 | rs373929 rs7911 | 2 |
| AAAT.ATTT   | 2 | 24410539 | 24410552 | 3.5     | .                  | .        | intergenic | -0.168 | rs699640043     | 2 |
| AT.AT       | 2 | 24525832 | 24525842 | 5.5     | .                  | .        | intergenic | .      | rs365087 rs7879 | 2 |
| AT.AT       | 2 | 24552785 | 24552795 | 5.5     | .                  | .        | intergenic | .      | .               | 2 |

|              |   |          |          |         |                    |           |            |        |                 |   |
|--------------|---|----------|----------|---------|--------------------|-----------|------------|--------|-----------------|---|
| AC.GT        | 2 | 24634758 | 24634768 | 5.5     | .                  | .         | intergenic | .      | .               | 2 |
| AAAC.GTTT    | 2 | 24654940 | 24654967 | 7       | .                  | .         | intergenic | 0.152  | rs786703297     | 2 |
| AAC.GTT      | 2 | 24663531 | 24663544 | 4.66667 | .                  | .         | intergenic | 0.068  | rs89032 rs7872  | 2 |
| AT.AT        | 2 | 24734911 | 24734922 | 6       | .                  | .         | intergenic | -0.093 | rs788518775     | 3 |
| AC.GT        | 2 | 24906681 | 24906693 | 6.5     | .                  | .         | intergenic | .      | rs704436561     | 2 |
| AG.CT        | 2 | 24936461 | 24936472 | 6       | .                  | .         | intergenic | -0.077 | .               | 2 |
| AAAC.GTTT    | 2 | 25136303 | 25136319 | 4.25    | .                  | .         | intergenic | -0.016 | rs692357142     | 2 |
| AAAT.ATTT    | 2 | 25346831 | 25346852 | 5.5     | .                  | .         | intergenic | -0.125 | rs55484 rs7885  | 3 |
| AAAC.GTTT    | 2 | 25429863 | 25429886 | 6       | .                  | .         | intergenic | -0.298 | rs45862 rs7892  | 2 |
| AAAG.CTTT    | 2 | 25660320 | 25660338 | 4.75    | .                  | .         | intergenic | 0.119  | rs790127470     | 2 |
| AT.AT        | 2 | 25727327 | 25727337 | 5.5     | .                  | .         | intergenic | -0.069 | rs22542 rs7871  | 2 |
| AAAC.GTTT    | 2 | 25762968 | 25762990 | 5.75    | .                  | .         | intergenic | .      | .               | 2 |
| AG.CT        | 2 | 25768757 | 25768774 | 9       | .                  | .         | intergenic | .      | rs790042714     | 2 |
| AG.CT        | 2 | 25856645 | 25856654 | 5       | .                  | .         | intergenic | -0.039 | .               | 3 |
| AAT.ATT      | 2 | 25902366 | 25902382 | 5.66667 | .                  | .         | intergenic | -0.025 | .               | 2 |
| AAC.GTT      | 2 | 25907414 | 25907437 | 8       | .                  | .         | intergenic | -0.006 | rs331780 rs7906 | 3 |
| AATT.AATT    | 2 | 25953715 | 25953733 | 4.75    | .                  | .         | intergenic | .      | rs787936285     | 2 |
| AAC.GTT      | 2 | 26012704 | 26012720 | 5.66667 | .                  | .         | intergenic | .      | rs79476 rs7931  | 2 |
| AAAC.GTTT    | 2 | 26048168 | 26048190 | 5.75    | .                  | .         | intergenic | -0.046 | rs117986 rs7902 | 2 |
| ACAT.ATGT    | 2 | 26234987 | 26235017 | 7.75    | .                  | .         | intergenic | 0.069  | rs772865 rs7869 | 2 |
| AAC.GTT      | 2 | 26817143 | 26817164 | 7.33333 | ENSSSCT00000014517 | PRR5L     | intron     | .      | rs399738 rs7890 | 3 |
| AAAAC.GTTTT  | 2 | 27390492 | 27390526 | 7       | ENSSSCT00000014519 | LDLRAD3   | intron     | -0.121 | rs128487 rs7881 | 2 |
| AAT.ATT      | 2 | 27434455 | 27434469 | 5       | ENSSSCT00000014519 | LDLRAD3   | intron     | 0.292  | .               | 3 |
| AG.CT        | 2 | 27861126 | 27861138 | 6.5     | .                  | .         | intergenic | -0.061 | rs792798150     | 3 |
| AGAGC.GCTCT  | 2 | 27924016 | 27924041 | 5.2     | ENSSSCT00000029479 | PAMR1     | intron     | -0.154 | rs787637939     | 2 |
| AC.GT        | 2 | 27973818 | 27973830 | 6.5     | .                  | .         | intergenic | 0.183  | rs694136434     | 3 |
| AG.CT        | 2 | 28166613 | 28166627 | 7.5     | ENSSSCT00000035454 | CD44      | intron     | .      | rs791279472     | 2 |
| AG.CT        | 2 | 28166613 | 28166627 | 7.5     | ENSSSCT00000034523 | CD44      | intron     | .      | rs791279472     | 2 |
| AG.CT        | 2 | 28166613 | 28166627 | 7.5     | ENSSSCT00000036240 | CD44      | intron     | .      | rs791279472     | 2 |
| AG.CT        | 2 | 28166613 | 28166627 | 7.5     | ENSSSCT00000034695 | CD44      | intron     | .      | rs791279472     | 2 |
| AG.CT        | 2 | 28166613 | 28166627 | 7.5     | ENSSSCT00000033911 | CD44      | intron     | .      | rs791279472     | 2 |
| AG.CT        | 2 | 28166613 | 28166627 | 7.5     | ENSSSCT00000033268 | CD44      | intron     | .      | rs791279472     | 2 |
| AG.CT        | 2 | 28166613 | 28166627 | 7.5     | ENSSSCT00000014523 | CD44      | intron     | .      | rs791279472     | 2 |
| AAAC.GTTT    | 2 | 28201884 | 28201898 | 3.75    | ENSSSCT00000033268 | CD44      | intron     | 0.405  | rs790193027     | 2 |
| AAAC.GTTT    | 2 | 28201884 | 28201898 | 3.75    | ENSSSCT00000036145 | CD44      | intron     | 0.405  | rs790193027     | 2 |
| AAAC.GTTT    | 2 | 28201884 | 28201898 | 3.75    | ENSSSCT00000035454 | CD44      | intron     | 0.405  | rs790193027     | 2 |
| AAAC.GTTT    | 2 | 28201884 | 28201898 | 3.75    | ENSSSCT00000034523 | CD44      | intron     | 0.405  | rs790193027     | 2 |
| AAAC.GTTT    | 2 | 28201884 | 28201898 | 3.75    | ENSSSCT00000036240 | CD44      | intron     | 0.405  | rs790193027     | 2 |
| AAAC.GTTT    | 2 | 28201884 | 28201898 | 3.75    | ENSSSCT00000034695 | CD44      | intron     | 0.405  | rs790193027     | 2 |
| AAAC.GTTT    | 2 | 28201884 | 28201898 | 3.75    | ENSSSCT00000035311 | CD44      | intron     | 0.405  | rs790193027     | 2 |
| AAAC.GTTT    | 2 | 28201884 | 28201898 | 3.75    | ENSSSCT00000014523 | CD44      | intron     | 0.405  | rs790193027     | 2 |
| AAAC.GTTT    | 2 | 28201884 | 28201898 | 3.75    | ENSSSCT00000033911 | CD44      | intron     | 0.405  | rs790193027     | 2 |
| AAAC.GTTT    | 2 | 28261521 | 28261544 | 6       | ENSSSCT00000035311 | CD44      | intron     | -0.042 | rs356874 rs7882 | 2 |
| AAAC.GTTT    | 2 | 28268915 | 28268938 | 6       | ENSSSCT00000035311 | CD44      | intron     | 0.036  | rs790444986     | 2 |
| AAAC.GTTT    | 2 | 28432012 | 28432034 | 5.75    | ENSSSCT00000014524 | PDHX      | intron     | 0.298  | rs789333835     | 2 |
| AAT.ATT      | 2 | 28506563 | 28506576 | 4.66667 | .                  | .         | intergenic | 0.23   | rs299722 rs7929 | 2 |
| AAAC.GTTT    | 2 | 28590772 | 28590795 | 6       | .                  | .         | intergenic | 0.082  | rs112705 rs7862 | 4 |
| AAAAT.ATTTT  | 2 | 28600559 | 28600575 | 3.4     | .                  | .         | intergenic | -0.055 | rs792984128     | 2 |
| AAGG.CCTT    | 2 | 28605494 | 28605506 | 3.25    | .                  | .         | intergenic | 0.733  | .               | 2 |
| AAAC.GTTT    | 2 | 28807996 | 28808017 | 5.5     | .                  | .         | intergenic | 0.046  | rs791527196     | 2 |
| AAAAC.GTTTT  | 2 | 28963490 | 28963509 | 4       | ENSSSCT00000014529 | ABTB2     | intron     | -0.107 | rs325698 rs7917 | 2 |
| AAACC.GTTTT  | 2 | 29059091 | 29059108 | 3.6     | ENSSSCT00000014529 | ABTB2     | intron     | .      | rs710182387     | 2 |
| AAAC.GTTT    | 2 | 29088535 | 29088576 | 10.5    | ENSSSCT00000014529 | ABTB2     | intron     | 0.368  | rs330879 rs7899 | 2 |
| AG.CT        | 2 | 29136023 | 29136037 | 7.5     | ENSSSCT00000014529 | ABTB2     | intron     | -0.571 | rs792778704     | 2 |
| AG.CT        | 2 | 29266329 | 29266346 | 9       | .                  | .         | intergenic | .      | rs788061139     | 2 |
| AAAAT.ATTTT  | 2 | 29429352 | 29429370 | 3.8     | .                  | .         | intergenic | 0.027  | rs381976 rs7903 | 2 |
| AAG.CTT      | 2 | 29623533 | 29623552 | 6.66667 | ENSSSCT00000014537 | KIAA1549L | intron     | 0.234  | rs788784998     | 2 |
| AAT.ATT      | 2 | 29725903 | 29725921 | 6.33333 | ENSSSCT00000014537 | KIAA1549L | intron     | 0.19   | rs236388 rs7863 | 2 |
| AG.CT        | 2 | 29793891 | 29793903 | 6.5     | ENSSSCT00000026025 | CD59      | intron     | .      | rs790487147     | 4 |
| AG.CT        | 2 | 29892924 | 29892939 | 8       | .                  | .         | intergenic | 0.322  | rs792281427     | 2 |
| ACCCC.GGGGT  | 2 | 29966005 | 29966020 | 3.2     | .                  | .         | intergenic | 0.048  | rs787748240     | 2 |
| AAC.GTT      | 2 | 29988915 | 29988942 | 9.33333 | .                  | .         | intergenic | 0.136  | rs139091 rs7864 | 2 |
| AAAC.GTTT    | 2 | 30342620 | 30342634 | 3.75    | ENSSSCT00000029285 | DEPDC7    | intron     | 0.865  | rs790305084     | 2 |
| AT.AT        | 2 | 30503863 | 30503874 | 6       | ENSSSCT00000014540 | QSER1     | intron     | 0.18   | .               | 4 |
| AT.AT        | 2 | 30503863 | 30503874 | 6       | ENSSSCT00000025799 | QSER1     | intron     | 0.18   | .               | 4 |
| AATG.CATT    | 2 | 30524868 | 30524893 | 6.5     | ENSSSCT00000014540 | QSER1     | intron     | 0.395  | rs788315940     | 2 |
| AATG.CATT    | 2 | 30524868 | 30524893 | 6.5     | ENSSSCT00000025799 | QSER1     | intron     | 0.395  | rs788315940     | 2 |
| AAAC.GTTT    | 2 | 30538519 | 30538541 | 5.75    | .                  | .         | intergenic | 0.285  | rs791915615     | 2 |
| AAAAAC.GTTTT | 2 | 30702670 | 30702693 | 4       | ENSSSCT00000025907 | CCDC73    | intron     | 0.087  | rs789310249     | 2 |
| AG.CT        | 2 | 30757108 | 30757119 | 6       | ENSSSCT00000014541 | EIF3M     | intron     | .      | rs791537679     | 2 |
| AAAT.ATTT    | 2 | 30779487 | 30779509 | 5.75    | .                  | .         | intergenic | -0.099 | rs118464 rs7936 | 2 |
| AAAC.GTTT    | 2 | 30819002 | 30819025 | 6       | .                  | .         | intergenic | .      | .               | 2 |
| AG.CT        | 2 | 30888068 | 30888084 | 8.5     | .                  | .         | intergenic | 0.123  | .               | 3 |
| ATC.GAT      | 2 | 31130248 | 31130272 | 8.33333 | ENSSSCT00000030193 | .         | intron     | 0.214  | rs304145 rs7915 | 2 |
| AG.CT        | 2 | 31312275 | 31312286 | 6       | .                  | .         | intergenic | 1.367  | rs790625389     | 2 |
| AAAC.GTTT    | 2 | 31717289 | 31717316 | 7       | ENSSSCT00000031770 | ELP4      | intron     | .      | rs331146 rs7913 | 2 |
| AAAC.GTTT    | 2 | 31717289 | 31717316 | 7       | ENSSSCT00000014547 | ELP4      | intron     | .      | rs331146 rs7913 | 2 |
| AAAT.ATTT    | 2 | 31955467 | 31955494 | 7       | .                  | .         | intergenic | -0.024 | rs793830208     | 2 |
| AAAT.ATTT    | 2 | 32030446 | 32030459 | 3.5     | .                  | .         | intergenic | .      | rs788668316     | 3 |
| AAAAAG.CTTTT | 2 | 32317302 | 32317327 | 4.33333 | .                  | .         | intergenic | 0.229  | rs312825 rs7872 | 2 |
| AAAAT.ATTTT  | 2 | 32420082 | 32420106 | 5       | .                  | .         | intergenic | 0.498  | rs786647060     | 2 |
| AATG.CATT    | 2 | 32507862 | 32507885 | 6       | .                  | .         | intergenic | -0.056 | rs135708 rs7892 | 2 |
| AAAAC.GTTTT  | 2 | 32558602 | 32558632 | 6.2     | ENSSSCT00000014554 | MPPED2    | intron     | -0.021 | rs792325053     | 2 |
| AAAAC.GTTTT  | 2 | 32558602 | 32558632 | 6.2     | ENSSSCT00000036062 | MPPED2    | intron     | -0.021 | rs792325053     | 2 |

|             |   |          |          |         |                    |        |            |        |                 |   |
|-------------|---|----------|----------|---------|--------------------|--------|------------|--------|-----------------|---|
| AAAAC.GTTTT | 2 | 32558602 | 32558632 | 6.2     | ENSSSCT00000032813 | MPPED2 | intron     | -0.021 | rs792325053     | 2 |
| AAAAC.GTTTT | 2 | 32558602 | 32558632 | 6.2     | ENSSSCT00000034692 | MPPED2 | intron     | -0.021 | rs792325053     | 2 |
| AAAAC.GTTTT | 2 | 32558602 | 32558632 | 6.2     | ENSSSCT00000036405 | MPPED2 | intron     | -0.021 | rs792325053     | 2 |
| AAC.GTT     | 2 | 32704823 | 32704836 | 4.66667 | ENSSSCT00000034692 | MPPED2 | intron     | 0.168  | rs793695934     | 3 |
| AAC.GTT     | 2 | 32704823 | 32704836 | 4.66667 | ENSSSCT00000014554 | MPPED2 | intron     | 0.168  | rs793695934     | 3 |
| AAC.GTT     | 2 | 32704823 | 32704836 | 4.66667 | ENSSSCT00000036405 | MPPED2 | intron     | 0.168  | rs793695934     | 3 |
| AAC.GTT     | 2 | 32704823 | 32704836 | 4.66667 | ENSSSCT00000032813 | MPPED2 | intron     | 0.168  | rs793695934     | 3 |
| AAC.GTT     | 2 | 32727902 | 32727923 | 7.33333 | .                  | .      | intergenic | -0.225 | rs691529408     | 2 |
| AAG.CTT     | 2 | 32838956 | 32838975 | 6.66667 | .                  | .      | intergenic | 0.191  | rs99366 rs7912  | 2 |
| AG.CT       | 2 | 32862319 | 32862331 | 6.5     | ENSSSCT00000014555 | FSHB   | intron     | 1.461  | .               | 2 |
| AATG.CATT   | 2 | 32940259 | 32940295 | 9.25    | .                  | .      | intergenic | 0.212  | rs790415396     | 3 |
| AC.GT       | 2 | 33131486 | 33131509 | 12      | .                  | .      | intergenic | 0.041  | rs786939664     | 2 |
| AT.AT       | 2 | 33155428 | 33155439 | 6       | .                  | .      | intergenic | 0.025  | rs792366696     | 2 |
| AAAG.CTTT   | 2 | 33239858 | 33239893 | 9       | .                  | .      | intergenic | -0.042 | rs747509 rs7863 | 3 |
| AAT.ATT     | 2 | 33347908 | 33347928 | 7       | .                  | .      | intergenic | 0.008  | rs792565862     | 2 |
| AAAC.GTTT   | 2 | 33395755 | 33395769 | 3.75    | .                  | .      | intergenic | .      | rs793333968     | 2 |
| AAAT.ATTT   | 2 | 33405201 | 33405223 | 5.75    | .                  | .      | intergenic | 0.041  | .               | 2 |
| AAAAT.ATTTT | 2 | 33607194 | 33607210 | 3.4     | .                  | .      | intergenic | -0.024 | rs99628 rs7930  | 2 |
| AAAT.ATTT   | 2 | 33827922 | 33827952 | 7.75    | .                  | .      | intergenic | .      | rs788766892     | 2 |
| AAAAC.GTTTT | 2 | 34040144 | 34040170 | 4.5     | .                  | .      | intergenic | .      | rs788831542     | 2 |
| AG.CT       | 2 | 34091900 | 34091913 | 7       | .                  | .      | intergenic | -0.267 | rs793697055     | 2 |
| CACAT.ATGTG | 2 | 34140527 | 34140549 | 3.83333 | .                  | .      | intergenic | 0.092  | rs791494872     | 2 |
| AAT.ATT     | 2 | 34405037 | 34405052 | 5.33333 | .                  | .      | intergenic | 0.138  | rs788557921     | 2 |
| AAT.ATT     | 2 | 34422282 | 34422304 | 7.66667 | .                  | .      | intergenic | 0.041  | .               | 2 |
| AAAAT.ATTTT | 2 | 34453428 | 34453445 | 3       | .                  | .      | intergenic | -0.045 | rs789635502     | 2 |
| AAAC.GTTT   | 2 | 34581005 | 34581023 | 4.75    | .                  | .      | intergenic | .      | rs787673377     | 2 |
| AATC.GATT   | 2 | 35109931 | 35109943 | 3.25    | .                  | .      | intergenic | 0.106  | rs788359591     | 2 |
| AC.GT       | 2 | 35156922 | 35156932 | 5.5     | .                  | .      | intergenic | -0.07  | .               | 2 |
| AAAC.GTTT   | 2 | 35379982 | 35379996 | 3.75    | .                  | .      | intergenic | .      | rs786377814     | 2 |
| AAT.ATT     | 2 | 35402151 | 35402163 | 4.33333 | .                  | .      | intergenic | 0.209  | rs791809524     | 2 |
| AAAC.GTTT   | 2 | 35697375 | 35697389 | 3.75    | .                  | .      | intergenic | -0.036 | rs788836812     | 2 |
| AAAG.CTTT   | 2 | 35704437 | 35704448 | 3       | .                  | .      | intergenic | 0.275  | rs787300903     | 3 |
| AT.AT       | 2 | 35737512 | 35737521 | 5       | .                  | .      | intergenic | -0.012 | rs788084764     | 2 |
| AAAT.ATTT   | 2 | 36004194 | 36004220 | 6.75    | .                  | .      | intergenic | .      | rs789836927     | 3 |
| CATAT.ATATG | 2 | 36326977 | 36327000 | 4       | ENSSSCT00000014567 | ANO3   | intron     | -0.12  | rs793427155     | 2 |
| AT.AT       | 2 | 36439351 | 36439362 | 6       | .                  | .      | intergenic | .      | .               | 3 |
| AAAC.GTTT   | 2 | 36470508 | 36470522 | 3.75    | .                  | .      | intergenic | 0.034  | rs786450669     | 2 |
| AT.AT       | 2 | 36476051 | 36476063 | 6.5     | .                  | .      | intergenic | -0.064 | rs792845746     | 2 |
| AAAC.GTTT   | 2 | 36530541 | 36530562 | 5.5     | .                  | .      | intergenic | -0.012 | rs710620 rs7868 | 2 |
| AAAT.ATTT   | 2 | 36749498 | 36749524 | 6.75    | .                  | .      | intergenic | .      | rs787612584     | 2 |
| AT.AT       | 2 | 36765193 | 36765208 | 8       | .                  | .      | intergenic | 0.001  | rs788153250     | 2 |
| AAAT.ATTT   | 2 | 36783478 | 36783503 | 6.5     | .                  | .      | intergenic | .      | rs790105892     | 2 |
| AT.AT       | 2 | 36784628 | 36784639 | 6       | .                  | .      | intergenic | -0.087 | rs790419897     | 3 |
| AAAT.ATTT   | 2 | 37033928 | 37033941 | 3.5     | .                  | .      | intergenic | .      | rs85189 rs7874  | 2 |
| AT.AT       | 2 | 37082758 | 37082772 | 7.5     | .                  | .      | intergenic | .      | rs792761297     | 4 |
| AAAAC.GTTTT | 2 | 37096764 | 37096786 | 3.83333 | .                  | .      | intergenic | 0.057  | rs739848 rs7925 | 2 |
| AAAAC.GTTTT | 2 | 37119786 | 37119803 | 3.6     | .                  | .      | intergenic | -0.002 | rs708161570     | 2 |
| CATAT.ATATG | 2 | 37150451 | 37150496 | 7.66667 | .                  | .      | intergenic | -0.092 | rs788792 rs7891 | 2 |
| AC.GT       | 2 | 37371445 | 37371463 | 9.5     | .                  | .      | intergenic | 0.051  | .               | 2 |
| ACAT.ATGT   | 2 | 37444458 | 37444470 | 3.25    | .                  | .      | intergenic | .      | rs213434 rs7894 | 3 |
| AGAT.ATCT   | 2 | 37462893 | 37462904 | 3       | .                  | .      | intergenic | .      | rs383437 rs7906 | 2 |
| AAAT.ATTT   | 2 | 37470219 | 37470246 | 7       | .                  | .      | intergenic | -0.001 | rs497394 rs7906 | 2 |
| AC.GT       | 2 | 37530338 | 37530351 | 7       | .                  | .      | intergenic | -0.02  | rs792809735     | 2 |
| AAT.ATT     | 2 | 37573681 | 37573696 | 5.33333 | ENSSSCT00000014569 | LUZP2  | intron     | -0.112 | rs787776695     | 2 |
| AG.CT       | 2 | 37665238 | 37665256 | 9.5     | ENSSSCT00000014569 | LUZP2  | intron     | 0.295  | rs528994 rs7890 | 3 |
| AG.CT       | 2 | 37779684 | 37779693 | 5       | ENSSSCT00000014569 | LUZP2  | intron     | -0.025 | rs788346278     | 2 |
| AAAG.CTTT   | 2 | 37892566 | 37892578 | 3.25    | ENSSSCT00000014569 | LUZP2  | intron     | -0.458 | rs788624577     | 2 |
| AC.GT       | 2 | 38136185 | 38136195 | 5.5     | .                  | .      | intergenic | -0.091 | rs792350004     | 2 |
| AAAC.GTTT   | 2 | 38257734 | 38257750 | 4.25    | .                  | .      | intergenic | -0.125 | rs328919 rs7882 | 2 |
| AG.CT       | 2 | 38505591 | 38505608 | 9       | .                  | .      | intergenic | -0.021 | rs769428 rs7925 | 2 |
| AT.AT       | 2 | 38629598 | 38629607 | 5       | .                  | .      | intergenic | 0.111  | rs787284534     | 2 |
| ACAG.CTGT   | 2 | 38640877 | 38640894 | 4.5     | .                  | .      | intergenic | .      | .               | 2 |
| AAGG.CCTT   | 2 | 38648511 | 38648556 | 11.5    | .                  | .      | intergenic | 0.3    | rs127019 rs7920 | 2 |
| AT.AT       | 2 | 38654604 | 38654613 | 5       | .                  | .      | intergenic | -0.123 | .               | 3 |
| AAAC.GTTT   | 2 | 38696303 | 38696325 | 5.75    | .                  | .      | intergenic | 0.034  | rs793155632     | 2 |
| AAT.ATT     | 2 | 38880844 | 38880858 | 5       | .                  | .      | intergenic | -0.036 | rs789757604     | 4 |
| AAT.ATT     | 2 | 38905770 | 38905787 | 6       | .                  | .      | intergenic | .      | rs786410690     | 4 |
| AG.CT       | 2 | 39213829 | 39213839 | 5.5     | .                  | .      | intergenic | .      | rs745122 rs7900 | 2 |
| AAAAC.GTTTT | 2 | 39567551 | 39567566 | 3.2     | .                  | .      | intergenic | .      | rs787571648     | 2 |
| AAC.GTT     | 2 | 39642026 | 39642042 | 5.66667 | .                  | .      | intergenic | -0.125 | rs787750791     | 2 |
| AAAAC.GTTTT | 2 | 39758712 | 39758730 | 3.16667 | .                  | .      | intergenic | 0.089  | rs792576376     | 2 |
| AAAC.GTTT   | 2 | 39843336 | 39843349 | 3.5     | .                  | .      | intergenic | -0.125 | rs789904957     | 2 |
| AC.GT       | 2 | 39916704 | 39916714 | 5.5     | .                  | .      | intergenic | 0.709  | rs788450267     | 3 |
| AAAAC.GTTTT | 2 | 40040428 | 40040470 | 8.6     | .                  | .      | intergenic | -0.067 | rs793113403     | 2 |
| AT.AT       | 2 | 40166670 | 40166680 | 5.5     | .                  | .      | intergenic | -0.157 | rs793778328     | 4 |
| AG.CT       | 2 | 40181829 | 40181843 | 7.5     | .                  | .      | intergenic | -0.118 | .               | 4 |
| AAAT.ATTT   | 2 | 40205395 | 40205416 | 5.5     | .                  | .      | intergenic | -0.09  | rs298686 rs7907 | 2 |
| AT.AT       | 2 | 40259263 | 40259286 | 12      | .                  | .      | intergenic | 0.055  | rs788231479     | 2 |
| AGAT.ATCT   | 2 | 40387860 | 40387890 | 7.75    | ENSSSCT00000014572 | ANO5   | intron     | 0.107  | rs787298168     | 2 |
| AGAT.ATCT   | 2 | 40387860 | 40387890 | 7.75    | ENSSSCT00000028769 | ANO5   | intron     | 0.107  | rs787298168     | 2 |
| AG.CT       | 2 | 40405351 | 40405381 | 15.5    | ENSSSCT00000014572 | ANO5   | intron     | 0.187  | rs786325683     | 2 |
| AG.CT       | 2 | 40405351 | 40405381 | 15.5    | ENSSSCT00000028769 | ANO5   | intron     | 0.187  | rs786325683     | 2 |
| AG.CT       | 2 | 40486040 | 40486055 | 8       | .                  | .      | intergenic | -0.191 | rs787430733     | 2 |
| AAT.ATT     | 2 | 40572490 | 40572502 | 4.33333 | .                  | .      | intergenic | 0.061  | .               | 2 |

|             |   |          |          |         |                    |         |            |        |              |   |
|-------------|---|----------|----------|---------|--------------------|---------|------------|--------|--------------|---|
| AC.GT       | 2 | 40625753 | 40625763 | 5.5     | .                  | .       | intergenic | -0.036 | .            | 3 |
| ATC.GAT     | 2 | 40674676 | 40674692 | 5.66667 | .                  | .       | intergenic | -0.028 | rs786229736  | 2 |
| AAAAC.GTTTT | 2 | 40751805 | 40751823 | 3.8     | .                  | .       | intergenic | .      | .            | 2 |
| AC.GT       | 2 | 40811274 | 40811288 | 7.5     | .                  | .       | intergenic | 0.698  | rs793061745  | 3 |
| AG.CT       | 2 | 41154823 | 41154835 | 6.5     | .                  | .       | intergenic | .      | rs788289162  | 2 |
| AAAT.ATTT   | 2 | 41195938 | 41195955 | 4.5     | .                  | .       | intergenic | .      | rs786734320  | 2 |
| AAC.GTT     | 2 | 41238094 | 41238115 | 7.33333 | .                  | .       | intergenic | 0.013  | rs787827068  | 2 |
| AAAT.ATTT   | 2 | 41301714 | 41301726 | 3.25    | .                  | .       | intergenic | -0.178 | rs786967672  | 2 |
| AAAAC.ATTTT | 2 | 41378157 | 41378183 | 5.4     | .                  | .       | intergenic | -0.006 | rs790486830  | 2 |
| AC.GT       | 2 | 41599921 | 41599933 | 6.5     | .                  | .       | intergenic | 0.225  | rs788934997  | 3 |
| AAAAC.GTTTT | 2 | 41856117 | 41856134 | 3.6     | ENSSSCT00000014576 | PRMT3   | intron     | .      | rs7896369646 | 2 |
| AAAG.CTTT   | 2 | 42032482 | 42032500 | 4.75    | .                  | .       | intergenic | .      | rs7887325060 | 2 |
| AC.GT       | 2 | 42564049 | 42564059 | 5.5     | .                  | .       | intergenic | -0.147 | rs790698205  | 2 |
| AC.GT       | 2 | 42627269 | 42627296 | 14      | .                  | .       | intergenic | -0.035 | rs787512496  | 2 |
| AAACC.GGTTT | 2 | 42804420 | 42804442 | 3.83333 | .                  | .       | intergenic | -0.024 | rs793445815  | 2 |
| AAAAC.GTTTT | 2 | 42950058 | 42950081 | 4       | .                  | .       | intergenic | .      | rs789930393  | 2 |
| AC.GT       | 2 | 43048637 | 43048651 | 7.5     | .                  | .       | intergenic | -0.02  | rs7926336561 | 2 |
| AATG.CATT   | 2 | 43267331 | 43267360 | 7.5     | ENSSSCT00000014585 | CSRP3   | intron     | 0.007  | rs790169900  | 2 |
| AAAC.GTTT   | 2 | 43328309 | 43328323 | 3.75    | .                  | .       | intergenic | .      | rs790549467  | 2 |
| AAC.GTT     | 2 | 43328968 | 43328983 | 5.33333 | .                  | .       | intergenic | .      | rs787369898  | 2 |
| AC.GT       | 2 | 43511471 | 43511481 | 5.5     | ENSSSCT00000014589 | PTPN5   | intron     | -0.058 | rs696679403  | 2 |
| AAC.GTT     | 2 | 43646389 | 43646419 | 10.3333 | ENSSSCT00000014593 | UEVLD   | intron     | 0.565  | rs7916191926 | 2 |
| AATT.AATT   | 2 | 43705603 | 43705616 | 3.5     | ENSSSCT00000014593 | UEVLD   | intron     | .      | rs7932191773 | 3 |
| AATT.AATT   | 2 | 43705603 | 43705616 | 3.5     | ENSSSCT00000014594 | LDHC    | intron     | .      | rs7932191773 | 3 |
| AT.AT       | 2 | 43909693 | 43909704 | 6       | .                  | .       | intergenic | 0.035  | rs791904772  | 2 |
| AT.AT       | 2 | 44031330 | 44031344 | 7.5     | .                  | .       | intergenic | 0.054  | rs701407757  | 2 |
| AACAC.GTGGT | 2 | 44072224 | 44072240 | 3.4     | .                  | .       | intergenic | .      | .            | 2 |
| AAAC.GTTT   | 2 | 44120814 | 44120843 | 7.5     | .                  | .       | intergenic | 0.058  | rs787786485  | 2 |
| AAAC.GTTT   | 2 | 45022680 | 45022702 | 5.75    | ENSSSCT00000024535 | PIK3C2A | intron     | .      | rs7929302445 | 2 |
| AG.CT       | 2 | 45105155 | 45105164 | 5       | .                  | .       | intergenic | .      | rs789462345  | 3 |
| AAAC.GTTT   | 2 | 45116547 | 45116563 | 4.25    | .                  | .       | intergenic | .      | rs793838474  | 2 |
| AAAAG.CTTTT | 2 | 45281467 | 45281486 | 3.33333 | ENSSSCT00000014616 | PLEKHA7 | intron     | .      | rs7935322475 | 2 |
| ACAT.ATGT   | 2 | 45640309 | 45640327 | 4.75    | ENSSSCT00000024179 | .       | intron     | 0.252  | rs788116404  | 2 |
| AAG.CTT     | 2 | 46107305 | 46107326 | 7.33333 | ENSSSCT00000014618 | .       | intron     | 0.768  | rs7906181596 | 2 |
| AG.CT       | 2 | 46456566 | 46456577 | 6       | .                  | .       | intergenic | -0.015 | .            | 2 |
| AAAT.ATTT   | 2 | 46515113 | 46515133 | 5.25    | .                  | .       | intergenic | .      | rs787915949  | 2 |
| AG.CT       | 2 | 46541834 | 46541845 | 6       | .                  | .       | intergenic | -0.07  | rs7878128283 | 2 |
| AAAAC.GTTTT | 2 | 46596400 | 46596419 | 4       | .                  | .       | intergenic | -0.068 | .            | 2 |
| AG.CT       | 2 | 46774957 | 46774967 | 5.5     | .                  | .       | intergenic | 0.063  | rs7905792247 | 3 |
| AG.CT       | 2 | 47099299 | 47099310 | 6       | ENSSSCT00000014620 | INSC    | intron     | 0.046  | rs786889743  | 3 |
| AAAC.GTTT   | 2 | 47114583 | 47114605 | 5.75    | ENSSSCT00000014620 | INSC    | intron     | 0.254  | rs789422308  | 2 |
| AAAC.GTTT   | 2 | 47311358 | 47311377 | 5       | .                  | .       | intergenic | .      | rs7889292347 | 2 |
| AAAAC.GTTTT | 2 | 47325177 | 47325193 | 3.4     | .                  | .       | intergenic | .      | rs787021365  | 2 |
| AAAT.ATTT   | 2 | 47419036 | 47419054 | 4.75    | .                  | .       | intergenic | .      | rs792640731  | 2 |
| AAC.GTT     | 2 | 47512879 | 47512895 | 5.66667 | .                  | .       | intergenic | .      | rs786335617  | 2 |
| AC.GT       | 2 | 47545433 | 47545445 | 6.5     | .                  | .       | intergenic | .      | rs786388135  | 2 |
| AATC.GATT   | 2 | 47610137 | 47610160 | 6       | ENSSSCT00000014624 | .       | intron     | 0.033  | rs7899287644 | 2 |
| AC.GT       | 2 | 47776107 | 47776131 | 12.5    | .                  | .       | intergenic | 0.312  | rs788035651  | 2 |
| ATCC.GGAT   | 2 | 48428602 | 48428628 | 6.75    | ENSSSCT00000014630 | .       | intron     | 0.203  | rs7879270787 | 3 |
| AT.AT       | 2 | 48574398 | 48574410 | 6.5     | ENSSSCT00000014630 | .       | intron     | 0.257  | rs7876334126 | 2 |
| AAC.GTT     | 2 | 48622204 | 48622216 | 4.33333 | .                  | .       | intergenic | .      | rs788813115  | 2 |
| AAAC.GTTT   | 2 | 49218540 | 49218562 | 5.75    | .                  | .       | intergenic | 0.057  | rs787848414  | 2 |
| AC.GT       | 2 | 49584698 | 49584721 | 12      | .                  | .       | intergenic | 0.161  | rs790828111  | 6 |
| AAAC.GTTT   | 2 | 50056572 | 50056587 | 4       | .                  | .       | intergenic | -0.013 | rs7890223066 | 2 |
| AAC.GTT     | 2 | 50222912 | 50222926 | 5       | .                  | .       | intergenic | -0.106 | rs790193322  | 2 |
| AC.GT       | 2 | 50267996 | 50268006 | 5.5     | .                  | .       | intergenic | 1.148  | rs787235503  | 2 |
| AC.GT       | 2 | 50330615 | 50330627 | 6.5     | ENSSSCT00000028332 | PARVA   | intron     | .      | rs787080829  | 2 |
| AAAC.GTTT   | 2 | 50979141 | 50979163 | 5.75    | .                  | .       | intergenic | .      | rs7863320273 | 2 |
| AAAT.ATTT   | 2 | 51474259 | 51474277 | 4.75    | ENSSSCT00000025073 | GALNT18 | intron     | -0.169 | rs787220251  | 2 |
| AAAT.ATTT   | 2 | 51474259 | 51474277 | 4.75    | ENSSSCT00000014643 | GALNT18 | intron     | -0.169 | rs787220251  | 2 |
| AT.AT       | 2 | 51554636 | 51554649 | 7       | .                  | .       | intergenic | 0.624  | rs712854257  | 2 |
| AC.GT       | 2 | 51560335 | 51560346 | 6       | .                  | .       | intergenic | -0.043 | rs7905366895 | 2 |
| AG.CT       | 2 | 51567836 | 51567846 | 5.5     | .                  | .       | intergenic | -0.003 | .            | 3 |
| AATC.GATT   | 2 | 52083250 | 52083268 | 4.75    | .                  | .       | intergenic | .      | rs7865128156 | 2 |
| AAGAG.CTCTT | 2 | 52112404 | 52112425 | 4.4     | .                  | .       | intergenic | 0.076  | rs786388596  | 2 |
| AATG.CATT   | 2 | 52118452 | 52118477 | 6.5     | .                  | .       | intergenic | 0.263  | rs7895177519 | 2 |
| ACAT.ATGT   | 2 | 52235374 | 52235385 | 3       | ENSSSCT00000029147 | MRVI1   | intron     | -0.072 | rs788682191  | 2 |
| AAAAC.GTTTT | 2 | 52451644 | 52451672 | 5.8     | .                  | .       | intergenic | 0.169  | rs788497566  | 2 |
| AAAC.GTTT   | 2 | 52471314 | 52471336 | 5.75    | .                  | .       | intergenic | .      | rs788678837  | 2 |
| AAAAT.ATTTT | 2 | 52617510 | 52617524 | 3       | ENSSSCT00000024151 | .       | intron     | 0.42   | rs789780879  | 2 |
| AAC.GTT     | 2 | 53145045 | 53145057 | 4.33333 | ENSSSCT00000014650 | SWAP70  | intron     | 0.064  | rs787993805  | 2 |
| AAAC.GTTT   | 2 | 53162583 | 53162602 | 5       | .                  | .       | intergenic | .      | rs792264692  | 4 |
| AAAC.GTTT   | 2 | 53386224 | 53386253 | 7.5     | .                  | .       | intergenic | .      | rs791191627  | 2 |
| AC.GT       | 2 | 53427110 | 53427122 | 6.5     | .                  | .       | intergenic | .      | rs790649333  | 3 |
| AGG.CCT     | 2 | 53881510 | 53881524 | 5       | ENSSSCT00000015283 | ARF1    | intron     | -0.217 | rs786621235  | 2 |
| AAAAG.CTTTT | 2 | 53912567 | 53912592 | 4.33333 | ENSSSCT00000031062 | WNT3A   | intron     | 0.161  | rs7925311513 | 2 |
| AAC.GTT     | 2 | 54358293 | 54358330 | 12.6667 | ENSSSCT00000015274 | SNAP47  | intron     | .      | rs793263009  | 2 |
| AAG.CTT     | 2 | 55242988 | 55243001 | 4.66667 | .                  | .       | intergenic | .      | rs710751494  | 3 |
| AG.CT       | 2 | 55275921 | 55275930 | 5       | .                  | .       | intergenic | .      | .            | 3 |
| AAC.GTT     | 2 | 55341632 | 55341651 | 6.66667 | .                  | .       | intergenic | .      | rs789257646  | 2 |
| AC.GT       | 2 | 55955790 | 55955801 | 6       | .                  | .       | intergenic | .      | rs791186255  | 2 |
| AG.CT       | 2 | 56014558 | 56014574 | 8.5     | .                  | .       | intergenic | .      | rs789335851  | 2 |
| AT.AT       | 2 | 56019526 | 56019544 | 9.5     | .                  | .       | intergenic | .      | rs789243194  | 2 |
| AGAT.ATCT   | 2 | 56158733 | 56158770 | 9.5     | .                  | .       | intergenic | .      | rs790973178  | 2 |

|               |   |          |          |         |                    |          |            |        |                    |   |
|---------------|---|----------|----------|---------|--------------------|----------|------------|--------|--------------------|---|
| AT.AT         | 2 | 56497302 | 56497312 | 5.5     | .                  | .        | intergenic | .      | rs787061884        | 2 |
| AT.AT         | 2 | 56539320 | 56539332 | 6.5     | .                  | .        | intergenic | .      | rs788941583        | 2 |
| AAT.ATT       | 2 | 56593405 | 56593420 | 5.33333 | .                  | .        | intergenic | .      | rs793160310        | 2 |
| AG.CT         | 2 | 56603842 | 56603855 | 7       | .                  | .        | intergenic | .      | .                  | 3 |
| AAT.ATT       | 2 | 57242059 | 57242071 | 4.33333 | .                  | .        | intergenic | .      | .                  | 3 |
| AAAT.ATTT     | 2 | 57278845 | 57278858 | 3.5     | .                  | .        | intergenic | .      | rs792690849        | 2 |
| AAC.GTT       | 2 | 57837341 | 57837352 | 4       | .                  | .        | intergenic | .      | rs791301945        | 2 |
| AAAC.GTTT     | 2 | 57850914 | 57850928 | 3.75    | .                  | .        | intergenic | .      | rs789979765        | 2 |
| AAAG.CTTT     | 2 | 57946144 | 57946172 | 7.25    | .                  | .        | intergenic | .      | rs793064963        | 2 |
| AC.GT         | 2 | 57961998 | 57962007 | 5       | ENSSSCT00000015225 | ZNF496   | intron     | .      | .                  | 4 |
| AT.AT         | 2 | 58137607 | 58137617 | 5.5     | .                  | .        | intergenic | .      | .                  | 2 |
| AC.GT         | 2 | 58591674 | 58591688 | 7.5     | .                  | .        | intergenic | 0.228  | rs792840493        | 2 |
| AAAC.GTTT     | 2 | 59053444 | 59053455 | 3       | ENSSSCT00000015192 | KXD1     | intron     | 0.005  | rs787380602        | 2 |
| AAAC.GTTT     | 2 | 59295349 | 59295364 | 4       | ENSSSCT00000015180 | IL12RB1  | intron     | .      | rs793250804        | 2 |
| AC.GT         | 2 | 59322555 | 59322565 | 5.5     | .                  | .        | intergenic | -0.07  | rs788989673        | 2 |
| AG.CT         | 2 | 59447052 | 59447070 | 9.5     | ENSSSCT00000015176 | SLC5A5   | intron     | .      | rs789009860        | 2 |
| AAAC.GTTT     | 2 | 59799624 | 59799636 | 3.25    | ENSSSCT00000028010 | .        | 3'utr      | 1.088  | rs788385826        | 2 |
| AT.AT         | 2 | 60114810 | 60114820 | 5.5     | .                  | .        | intergenic | .      | rs788374 rs7873    | 4 |
| AAAC.GTTT     | 2 | 60118555 | 60118577 | 5.75    | .                  | .        | intergenic | .      | rs792384477        | 2 |
| AATG.CATT     | 2 | 60284809 | 60284838 | 7.5     | ENSSSCT00000015149 | CPAMD8   | intron     | 0.058  | rs7876571 rs7899   | 2 |
| AT.AT         | 2 | 60422066 | 60422083 | 9       | .                  | .        | intergenic | .      | rs78753160 rs7872  | 2 |
| AAAG.CTTT     | 2 | 60543235 | 60543261 | 6.75    | .                  | .        | intergenic | 0.241  | rs7886376311       | 2 |
| AT.AT         | 2 | 60594789 | 60594799 | 5.5     | .                  | .        | intergenic | .      | rs793708030        | 2 |
| AAAAC.GTTTT   | 2 | 60729494 | 60729510 | 3.4     | ENSSSCT00000015138 | C19orf44 | intron     | .      | rs7886724761       | 2 |
| AG.CT         | 2 | 60901498 | 60901512 | 7.5     | .                  | .        | intergenic | .      | rs791299181        | 2 |
| AC.GT         | 2 | 61028193 | 61028211 | 9.5     | ENSSSCT00000015134 | FAM32A   | promoter   | .      | rs791655726        | 3 |
| AAAT.ATTT     | 2 | 61028990 | 61029008 | 4.75    | .                  | .        | intergenic | .      | rs791339420        | 2 |
| AAAAAT.ATTTTT | 2 | 61037610 | 61037631 | 3.66667 | .                  | .        | intergenic | .      | rs793627286        | 2 |
| AC.GT         | 2 | 61126632 | 61126644 | 6.5     | .                  | .        | intergenic | .      | rs787155538        | 3 |
| ACC.GGT       | 2 | 61169672 | 61169684 | 4.33333 | ENSSSCT00000015127 | TPM4     | intron     | 0.051  | rs790206471        | 3 |
| AG.CT         | 2 | 61441715 | 61441725 | 5.5     | ENSSSCT00000022303 | .        | intron     | .      | rs7886532873       | 2 |
| ATC.GAT       | 2 | 61480316 | 61480342 | 9       | ENSSSCT00000022303 | .        | intron     | .      | rs791914585        | 3 |
| AATG.CATT     | 2 | 61606832 | 61606853 | 5.5     | ENSSSCT00000024967 | CYP4F22  | intron     | 0.075  | rs793488279        | 2 |
| AAAC.GTTT     | 2 | 61855007 | 61855018 | 3       | ENSSSCT00000027972 | BRD4     | intron     | -0.161 | rs790672362        | 2 |
| AC.GT         | 2 | 62162129 | 62162138 | 5       | ENSSSCT00000015111 | SLC1A6   | intron     | 0.062  | .                  | 3 |
| AAAAC.GTTTT   | 2 | 62544014 | 62544036 | 4.6     | .                  | .        | intergenic | .      | rs7932589 rs7915   | 2 |
| AAAT.ATTT     | 2 | 62835454 | 62835474 | 5.25    | .                  | .        | intergenic | .      | rs7886491684       | 2 |
| AG.CT         | 2 | 62861442 | 62861463 | 11      | .                  | .        | intergenic | .      | rs7887770743       | 2 |
| AT.AT         | 2 | 63268091 | 63268112 | 11      | .                  | .        | intergenic | .      | rs79241598 rs7900  | 2 |
| AAAAG.CTTTT   | 2 | 63929508 | 63929525 | 3.6     | .                  | .        | intergenic | .      | .                  | 2 |
| AT.AT         | 2 | 64039361 | 64039370 | 5       | .                  | .        | intergenic | .      | rs791549002        | 2 |
| AG.CT         | 2 | 64123205 | 64123215 | 5.5     | .                  | .        | intergenic | .      | rs7886331144       | 2 |
| AT.AT         | 2 | 64331690 | 64331702 | 6.5     | .                  | .        | intergenic | .      | rs7889442224       | 2 |
| AAAAAC.GTTTT  | 2 | 64832114 | 64832140 | 4.5     | ENSSSCT00000015062 | .        | intron     | .      | rs79355377 rs7877  | 2 |
| AG.CT         | 2 | 64834514 | 64834524 | 5.5     | ENSSSCT00000015062 | .        | intron     | .      | rs79183146 rs7916  | 2 |
| AAAC.GTTT     | 2 | 65212869 | 65212891 | 5.75    | ENSSSCT00000015055 | .        | promoter   | .      | rs791440616        | 2 |
| AC.GT         | 2 | 65443727 | 65443745 | 9.5     | .                  | .        | intergenic | .      | rs792160984        | 2 |
| AAAT.ATTT     | 2 | 65496147 | 65496161 | 3.75    | .                  | .        | intergenic | .      | rs7886821994       | 2 |
| AC.GT         | 2 | 65875674 | 65875696 | 11.5    | .                  | .        | intergenic | .      | rs7889978101       | 4 |
| AAAC.GTTT     | 2 | 66178260 | 66178281 | 5.5     | .                  | .        | intergenic | .      | rs79255560 rs7903  | 2 |
| AAAC.GTTT     | 2 | 66637580 | 66637593 | 3.5     | ENSSSCT00000015002 | ASNA1    | intron     | .      | .                  | 2 |
| AAAG.CTTT     | 2 | 66667644 | 66667663 | 5       | ENSSSCT00000015000 | TNPO2    | 3'utr      | 1.078  | rs787238318        | 2 |
| AAAC.GTTT     | 2 | 66747749 | 66747764 | 4       | .                  | .        | intergenic | .      | rs788584157        | 2 |
| AC.GT         | 2 | 66888190 | 66888204 | 7.5     | .                  | .        | intergenic | .      | rs791266499        | 3 |
| AAAC.GTTT     | 2 | 67231815 | 67231833 | 4.75    | ENSSSCT00000014979 | MUC16    | intron     | .      | rs792249357        | 2 |
| AAAC.GTTT     | 2 | 67231815 | 67231833 | 4.75    | ENSSSCT00000022428 | MUC16    | intron     | .      | rs792249357        | 2 |
| AT.AT         | 2 | 67294389 | 67294399 | 5.5     | .                  | .        | intergenic | 0.088  | rs792228653        | 2 |
| AAAT.ATTT     | 2 | 67320131 | 67320156 | 6.5     | .                  | .        | intergenic | .      | rs790708952 rs7935 | 2 |
| AATG.CATT     | 2 | 67448503 | 67448524 | 5.5     | .                  | .        | intergenic | .      | rs792794286        | 2 |
| AAC.GTT       | 2 | 68116064 | 68116091 | 9.33333 | .                  | .        | intergenic | .      | rs79151772 rs7889  | 2 |
| AAAT.ATTT     | 2 | 68366008 | 68366020 | 3.25    | .                  | .        | intergenic | .      | rs790759385        | 2 |
| AC.GT         | 2 | 68412365 | 68412379 | 7.5     | .                  | .        | intergenic | .      | rs790725095        | 2 |
| AT.AT         | 2 | 68442894 | 68442904 | 5.5     | .                  | .        | intergenic | .      | .                  | 2 |
| AAAC.GTTT     | 2 | 68496078 | 68496091 | 3.5     | ENSSSCT00000023717 | .        | promoter   | .      | rs7914361 rs7912   | 2 |
| AAAC.GTTT     | 2 | 68496078 | 68496091 | 3.5     | ENSSSCT00000031182 | .        | promoter   | .      | rs7914361 rs7912   | 2 |
| AATC.GATT     | 2 | 69370487 | 69370521 | 8.75    | .                  | .        | intergenic | .      | rs79361812 rs7899  | 2 |
| AAC.GTT       | 2 | 69704861 | 69704880 | 6.66667 | ENSSSCT00000014905 | ATG4D    | promoter   | .      | rs792223697        | 2 |
| AT.AT         | 2 | 70108600 | 70108609 | 5       | .                  | .        | intergenic | .      | rs790254636        | 2 |
| AAAC.GTTT     | 2 | 70179206 | 70179224 | 4.75    | .                  | .        | intergenic | .      | rs791726938        | 2 |
| AAAAC.GTTTT   | 2 | 70554598 | 70554616 | 3.8     | ENSSSCT00000014868 | ELOF1    | promoter   | .      | rs791556973        | 2 |
| AAAAT.ATTTT   | 2 | 70977292 | 70977318 | 5.4     | .                  | .        | intergenic | .      | rs7889174305       | 2 |
| AAAAC.GTTTT   | 2 | 71667642 | 71667672 | 6.2     | .                  | .        | intergenic | .      | rs79142309 rs7884  | 2 |
| AAAC.GTTT     | 2 | 71668113 | 71668135 | 5.75    | .                  | .        | intergenic | .      | rs7887261715       | 2 |
| AAG.CTT       | 2 | 71873954 | 71873972 | 6.33333 | .                  | .        | intergenic | .      | rs788214667        | 2 |
| AATT.AATT     | 2 | 72172214 | 72172229 | 4       | ENSSSCT00000014821 | PEX11G   | intron     | -0.266 | rs787648135        | 2 |
| AAAT.ATTT     | 2 | 73208255 | 73208277 | 5.75    | ENSSSCT00000014786 | GTF2F1   | intron     | .      | rs790611885        | 2 |
| AC.GT         | 2 | 73330405 | 73330431 | 13.5    | ENSSSCT00000026229 | ACER1    | intron     | 1.208  | .                  | 2 |
| AAAT.ATTT     | 2 | 73922978 | 73922992 | 3.75    | ENSSSCT00000014770 | SAFB2    | intron     | -0.257 | rs789182128        | 2 |
| AAAC.GTTT     | 2 | 74165839 | 74165857 | 4.75    | .                  | .        | intergenic | -0.181 | rs791105334        | 2 |
| AAAAC.GTTTT   | 2 | 74851196 | 74851214 | 3.8     | ENSSSCT00000014758 | .        | promoter   | -0.047 | rs79195006 rs7894  | 2 |
| AAAT.ATTT     | 2 | 75442059 | 75442073 | 3.75    | .                  | .        | intergenic | -0.363 | rs7905685 rs7894   | 2 |
| AG.CT         | 2 | 75575452 | 75575475 | 12      | ENSSSCT00000014736 | .        | intron     | -0.273 | rs7909024084       | 2 |
| ACC.GGT       | 2 | 76097141 | 76097158 | 6       | .                  | .        | intergenic | 0.276  | rs791433085        | 2 |
| AT.AT         | 2 | 76154958 | 76154970 | 6.5     | .                  | .        | intergenic | .      | rs790013745        | 2 |

|             |   |          |          |         |                    |          |            |        |               |   |
|-------------|---|----------|----------|---------|--------------------|----------|------------|--------|---------------|---|
| AT.AT       | 2 | 76214689 | 76214700 | 6       | .                  | .        | intergenic | .      | .             | 3 |
| AC.GT       | 2 | 76438694 | 76438716 | 11.5    | .                  | .        | intergenic | -0.161 | rs788477340   | 2 |
| AAAC.GTTT   | 2 | 76640508 | 76640526 | 4.75    | .                  | .        | intergenic | -0.394 | rs786531180   | 2 |
| AAT.ATT     | 2 | 76726473 | 76726489 | 5.66667 | ENSSSCT00000031657 | TMPRSS9  | intron     | .      | 169144 rs7870 | 2 |
| AC.GT       | 2 | 77062837 | 77062848 | 6       | ENSSSCT00000028307 | DOT1L    | intron     | .      | rs793213130   | 2 |
| AC.GT       | 2 | 77062837 | 77062848 | 6       | ENSSSCT00000014701 | DOT1L    | intron     | .      | rs793213130   | 2 |
| AC.GT       | 2 | 77301862 | 77301875 | 7       | .                  | .        | intergenic | .      | 337146 rs7921 | 2 |
| AC.GT       | 2 | 78008670 | 78008683 | 7       | .                  | .        | intergenic | .      | rs787562270   | 2 |
| AT.AT       | 2 | 79128389 | 79128411 | 11.5    | .                  | .        | intergenic | .      | rs789808125   | 2 |
| ACC.GGT     | 2 | 79390833 | 79390854 | 7.33333 | .                  | .        | intergenic | .      | 771017 rs7864 | 2 |
| AAAAC.GTTTT | 2 | 79827599 | 79827632 | 6.8     | ENSSSCT00000015303 | MAPK9    | intron     | .      | .             | 2 |
| AT.AT       | 2 | 80468689 | 80468702 | 7       | ENSSSCT00000015315 | CANX     | intron     | .      | rs789857467   | 4 |
| ACACC.GGTGT | 2 | 80686084 | 80686098 | 3       | .                  | .        | intergenic | -0.006 | rs792169575   | 2 |
| AAC.GTT     | 2 | 81030289 | 81030302 | 4.66667 | ENSSSCT00000031469 | ZNF354C  | intron     | .      | rs793556170   | 2 |
| AT.AT       | 2 | 81088736 | 81088752 | 8.5     | .                  | .        | intergenic | .      | rs786636418   | 2 |
| AAAC.GTTT   | 2 | 81178626 | 81178641 | 4       | .                  | .        | intergenic | 0.277  | rs787730412   | 2 |
| AAAAT.ATTTT | 2 | 81374445 | 81374463 | 3.8     | .                  | .        | intergenic | 0.259  | rs789484955   | 2 |
| ACAT.ATGT   | 2 | 81601829 | 81601849 | 5.25    | .                  | .        | intergenic | .      | rs793072898   | 2 |
| AAAC.GTTT   | 2 | 81626905 | 81626927 | 5.75    | .                  | .        | intergenic | 0.063  | rs793437296   | 2 |
| AATG.CATT   | 2 | 81888748 | 81888764 | 4.25    | ENSSSCT00000015329 | RMND5B   | intron     | 0.364  | .             | 2 |
| AATG.CATT   | 2 | 81888748 | 81888764 | 4.25    | ENSSSCT00000015334 | FAM193B  | intron     | 0.364  | .             | 2 |
| AAAAC.GTTTT | 2 | 81909913 | 81909939 | 4.5     | ENSSSCT00000015329 | RMND5B   | intron     | .      | rs787430004   | 2 |
| AAAAC.GTTTT | 2 | 81909913 | 81909939 | 4.5     | ENSSSCT00000015333 | .        | promoter   | .      | rs787430004   | 2 |
| AAAT.ATTT   | 2 | 81984420 | 81984433 | 3.5     | ENSSSCT00000015329 | RMND5B   | intron     | .      | rs788988498   | 2 |
| AAAAC.GTTTT | 2 | 82143179 | 82143205 | 4.5     | ENSSSCT00000015341 | NSD1     | intron     | .      | rs789750839   | 2 |
| AC.GT       | 2 | 83222756 | 83222766 | 5.5     | ENSSSCT00000015361 | SIMC1    | intron     | 0.221  | rs793007928   | 3 |
| AAAT.ATTT   | 2 | 83502688 | 83502711 | 6       | .                  | .        | intergenic | -0.093 | rs792192138   | 3 |
| AC.GT       | 2 | 83701703 | 83701717 | 7.5     | .                  | .        | intergenic | -0.026 | rs792321599   | 2 |
| AC.GT       | 2 | 83918692 | 83918702 | 5.5     | ENSSSCT00000026067 | FCHO2    | intron     | 1.289  | 314250 rs7933 | 2 |
| AATG.CATT   | 2 | 84023259 | 84023287 | 7.25    | .                  | .        | intergenic | .      | rs789452986   | 2 |
| AAAT.ATTT   | 2 | 84046121 | 84046134 | 3.5     | ENSSSCT00000015367 | TMEM174  | 3'utr      | 0      | rs791594183   | 2 |
| AAAC.GTTT   | 2 | 84089836 | 84089852 | 4.25    | .                  | .        | intergenic | 0.276  | 333570 rs7912 | 2 |
| AAAAT.ATTTT | 2 | 84253916 | 84253940 | 5       | .                  | .        | intergenic | -0.173 | rs791377758   | 2 |
| AC.GT       | 2 | 84355216 | 84355226 | 5.5     | .                  | .        | intergenic | -0.155 | 303880 rs7892 | 2 |
| AAAT.ATTT   | 2 | 84381459 | 84381480 | 5.5     | .                  | .        | intergenic | 0.223  | 338047 rs7917 | 2 |
| AAAAT.ATTTT | 2 | 84932166 | 84932188 | 3.83333 | .                  | .        | intergenic | 0.177  | rs793413434   | 2 |
| AC.GT       | 2 | 85161144 | 85161153 | 5       | .                  | .        | intergenic | 0.33   | rs690172201   | 2 |
| AAAC.GTTT   | 2 | 85264685 | 85264704 | 5       | .                  | .        | intergenic | .      | rs790850475   | 2 |
| AG.CT       | 2 | 85402032 | 85402042 | 5.5     | ENSSSCT00000015375 | GFM2     | intron     | .      | .             | 3 |
| AAAC.GTTT   | 2 | 85612810 | 85612829 | 5       | .                  | .        | intergenic | 0.024  | 386149 rs7935 | 2 |
| AG.CT       | 2 | 85625340 | 85625349 | 5       | .                  | .        | intergenic | 0.162  | rs788862461   | 2 |
| AAAAC.GTTTT | 2 | 85730335 | 85730352 | 3.6     | ENSSSCT00000015379 | .        | promoter   | 0.216  | rs787552926   | 2 |
| AG.CT       | 2 | 85732065 | 85732079 | 7.5     | ENSSSCT00000015379 | .        | cds        | .      | rs792939048   | 2 |
| AAAC.GTTT   | 2 | 85874522 | 85874545 | 6       | .                  | .        | intergenic | 0.366  | rs792600814   | 4 |
| AAAC.GTTT   | 2 | 86168138 | 86168164 | 6.75    | ENSSSCT00000015382 | COL4A3BP | intron     | 0.286  | rs789718167   | 2 |
| AAAC.GTTT   | 2 | 86168138 | 86168164 | 6.75    | ENSSSCT00000026755 | COL4A3BP | intron     | 0.286  | rs789718167   | 2 |
| AC.GT       | 2 | 86388142 | 86388183 | 21      | .                  | .        | intergenic | 0.178  | rs788988497   | 3 |
| AG.CT       | 2 | 86607526 | 86607535 | 5       | .                  | .        | intergenic | 0.088  | .             | 3 |
| AC.GT       | 2 | 86753344 | 86753354 | 5.5     | .                  | .        | intergenic | 0.152  | rs788995052   | 2 |
| AAAAC.GTTTT | 2 | 86766964 | 86766999 | 7.2     | .                  | .        | intergenic | 0.082  | 399637 rs7888 | 2 |
| AT.AT       | 2 | 87200724 | 87200736 | 6.5     | ENSSSCT00000015389 | IQGAP2   | intron     | 0.128  | rs788381465   | 2 |
| AAAT.ATTT   | 2 | 87225047 | 87225064 | 4.5     | .                  | .        | intergenic | -0.061 | rs788222439   | 2 |
| AAC.GTT     | 2 | 87409879 | 87409895 | 5.66667 | .                  | .        | intergenic | 0.033  | 799615 rs7894 | 2 |
| AAAT.ATTT   | 2 | 87421000 | 87421014 | 3.75    | .                  | .        | intergenic | 0.218  | rs787795306   | 2 |
| AC.GT       | 2 | 87486794 | 87486803 | 5       | .                  | .        | intergenic | .      | rs792217597   | 4 |
| AG.CT       | 2 | 87790729 | 87790741 | 6.5     | .                  | .        | intergenic | 0.238  | rs786452778   | 2 |
| AC.GT       | 2 | 87833451 | 87833464 | 7       | ENSSSCT00000015399 | PDE8B    | intron     | -0.242 | rs788428941   | 2 |
| AT.AT       | 2 | 88186628 | 88186639 | 6       | .                  | .        | intergenic | 0.121  | rs791501331   | 2 |
| AAAT.ATTT   | 2 | 88612825 | 88612840 | 4       | ENSSSCT00000015403 | .        | intron     | 0.28   | rs788691457   | 2 |
| AAC.GTT     | 2 | 88701669 | 88701688 | 6.66667 | ENSSSCT00000015403 | .        | intron     | 0.131  | rs789282523   | 2 |
| AT.AT       | 2 | 89397825 | 89397839 | 7.5     | .                  | .        | intergenic | .      | rs793638485   | 2 |
| AAAC.GTTT   | 2 | 89530464 | 89530486 | 5.75    | ENSSSCT00000015413 | DMGDH    | intron     | 0.239  | rs793300985   | 2 |
| AC.GT       | 2 | 89574345 | 89574357 | 6.5     | ENSSSCT00000015413 | DMGDH    | intron     | 0.152  | rs789105050   | 2 |
| AC.GT       | 2 | 89574345 | 89574357 | 6.5     | ENSSSCT00000015408 | .        | intron     | 0.152  | rs789105050   | 2 |
| AAC.GTT     | 2 | 89584478 | 89584494 | 5.66667 | ENSSSCT00000015413 | DMGDH    | intron     | 0.043  | rs787799650   | 2 |
| AAAC.GTTT   | 2 | 89842459 | 89842492 | 8.5     | .                  | .        | intergenic | 0.149  | rs789264074   | 2 |
| AAAT.ATTT   | 2 | 90112473 | 90112491 | 4.75    | .                  | .        | intergenic | 0.005  | 736607 rs7910 | 2 |
| AAGG.CCTT   | 2 | 90216853 | 90216869 | 4.25    | ENSSSCT00000024422 | .        | intron     | .      | rs787871955   | 2 |
| AAC.GTT     | 2 | 90235938 | 90235953 | 5.33333 | .                  | .        | intergenic | .      | 125062 rs7878 | 2 |
| AG.CT       | 2 | 90394059 | 90394074 | 8       | ENSSSCT00000015420 | .        | intron     | 0.272  | 124999 rs7930 | 2 |
| AATG.CATT   | 2 | 90413912 | 90413928 | 4.25    | .                  | .        | intergenic | 0.2    | rs790820804   | 2 |
| AG.CT       | 2 | 90515084 | 90515094 | 5.5     | ENSSSCT00000015421 | .        | intron     | 0.381  | .             | 4 |
| AAAC.GTTT   | 2 | 90599333 | 90599347 | 3.75    | .                  | .        | intergenic | 0.053  | 794935 rs7904 | 2 |
| AT.AT       | 2 | 91204065 | 91204083 | 9.5     | ENSSSCT00000015430 | MSH3     | intron     | -0.22  | rs789622819   | 2 |
| AC.GT       | 2 | 91220433 | 91220459 | 13.5    | ENSSSCT00000015430 | MSH3     | intron     | 0.067  | rs790805030   | 3 |
| AACT.AGTTT  | 2 | 91313187 | 91313202 | 3.2     | .                  | .        | intergenic | 0.128  | rs792439605   | 2 |
| AG.CT       | 2 | 91719240 | 91719250 | 5.5     | .                  | .        | intergenic | 0.198  | .             | 4 |
| AAC.GTT     | 2 | 91849064 | 91849078 | 5       | .                  | .        | intergenic | .      | 320705 rs7910 | 2 |
| AAAC.GTTT   | 2 | 91898225 | 91898244 | 5       | ENSSSCT00000015435 | SSBP2    | intron     | -0.048 | rs789921958   | 2 |
| AAAC.GTTT   | 2 | 91898225 | 91898244 | 5       | ENSSSCT00000023648 | SSBP2    | intron     | -0.048 | rs789921958   | 2 |
| AG.CT       | 2 | 92015956 | 92015967 | 6       | .                  | .        | intergenic | 0.275  | 360703 rs7932 | 2 |
| AAAAC.GTTTT | 2 | 92078654 | 92078683 | 6       | .                  | .        | intergenic | 0.191  | rs792344482   | 2 |
| AAAG.CTTT   | 2 | 92099944 | 92099965 | 5.5     | .                  | .        | intergenic | .      | .             | 2 |
| AAAAC.GTTTT | 2 | 92334753 | 92334771 | 3.16667 | .                  | .        | intergenic | 0.076  | rs790728489   | 2 |

|              |   |           |           |         |                    |          |            |        |               |   |
|--------------|---|-----------|-----------|---------|--------------------|----------|------------|--------|---------------|---|
| AG.CT        | 2 | 92794239  | 92794251  | 6.5     | .                  | .        | intergenic | 0.241  | 503197 rs7905 | 2 |
| AC.GT        | 2 | 92900293  | 92900305  | 6.5     | .                  | .        | intergenic | 0.009  | rs788594790   | 2 |
| AAT.ATT      | 2 | 93391063  | 93391078  | 5.33333 | .                  | .        | intergenic | .      | .             | 3 |
| AT.AT        | 2 | 93589051  | 93589063  | 6.5     | ENSSSCT00000015439 | XRCC4    | intron     | .      | 243127 rs7893 | 2 |
| AC.GT        | 2 | 93641300  | 93641310  | 5.5     | .                  | .        | intergenic | 0.015  | rs788230938   | 2 |
| ACAT.ATGT    | 2 | 93665541  | 93665567  | 6.75    | .                  | .        | intergenic | 0.367  | 282639 rs7927 | 2 |
| AAC.GTT      | 2 | 93700511  | 93700533  | 7.66667 | .                  | .        | intergenic | .      | 750236 rs7882 | 3 |
| AAAC.GTTT    | 2 | 93774260  | 93774278  | 4.75    | .                  | .        | intergenic | 0.019  | .             | 2 |
| AG.CT        | 2 | 93780280  | 93780290  | 5.5     | .                  | .        | intergenic | 0.154  | .             | 4 |
| AT.AT        | 2 | 93839807  | 93839817  | 5.5     | ENSSSCT00000032588 | VCAN     | intron     | -0.051 | rs789071097   | 3 |
| AT.AT        | 2 | 93839807  | 93839817  | 5.5     | ENSSSCT00000028327 | VCAN     | intron     | -0.051 | rs789071097   | 3 |
| AT.AT        | 2 | 93839807  | 93839817  | 5.5     | ENSSSCT00000015440 | VCAN     | intron     | -0.051 | rs789071097   | 3 |
| AT.AT        | 2 | 93839807  | 93839817  | 5.5     | ENSSSCT00000035607 | VCAN     | intron     | -0.051 | rs789071097   | 3 |
| AT.AT        | 2 | 93839807  | 93839817  | 5.5     | ENSSSCT00000033743 | VCAN     | intron     | -0.051 | rs789071097   | 3 |
| AT.AT        | 2 | 93839807  | 93839817  | 5.5     | ENSSSCT00000033299 | VCAN     | intron     | -0.051 | rs789071097   | 3 |
| AT.AT        | 2 | 93839807  | 93839817  | 5.5     | ENSSSCT00000031327 | VCAN     | intron     | -0.051 | rs789071097   | 3 |
| AGAGG.CCTCT  | 2 | 93992953  | 93992972  | 3.33333 | .                  | .        | intergenic | -0.132 | rs791199710   | 2 |
| AT.AT        | 2 | 94021708  | 94021722  | 7.5     | .                  | .        | intergenic | -0.119 | .             | 3 |
| AAAC.GTTT    | 2 | 94424080  | 94424098  | 4.75    | .                  | .        | intergenic | -0.101 | 50815 rs7927  | 2 |
| AAAAAC.GTTTT | 2 | 94428271  | 94428293  | 3.83333 | .                  | .        | intergenic | -0.016 | 106278 rs7906 | 2 |
| AAAC.GTTT    | 2 | 94504663  | 94504683  | 5.25    | .                  | .        | intergenic | 0.333  | .             | 2 |
| AAAC.GTTT    | 2 | 94609070  | 94609094  | 6.25    | .                  | .        | intergenic | -0.038 | 371411 rs7918 | 2 |
| AC.GT        | 2 | 94720997  | 94721011  | 7.5     | .                  | .        | intergenic | -0.002 | rs790242543   | 4 |
| AATT.AATT    | 2 | 94944446  | 94944467  | 5.5     | .                  | .        | intergenic | 0.028  | rs787313320   | 2 |
| AT.AT        | 2 | 95124201  | 95124211  | 5.5     | .                  | .        | intergenic | -0.011 | rs790856814   | 2 |
| AAAT.ATTT    | 2 | 95594477  | 95594499  | 5.75    | ENSSSCT00000024141 | .        | promoter   | 0.107  | 504462 rs7923 | 2 |
| AAAC.GTTT    | 2 | 95822457  | 95822469  | 3.25    | .                  | .        | intergenic | -0.011 | 184874 rs7895 | 2 |
| AT.AT        | 2 | 95931742  | 95931751  | 5       | .                  | .        | intergenic | 0.541  | rs790042797   | 2 |
| AAAC.GTTT    | 2 | 96125485  | 96125504  | 5       | .                  | .        | intergenic | -0.043 | 723095 rs7937 | 2 |
| AC.GT        | 2 | 96210295  | 96210305  | 5.5     | .                  | .        | intergenic | .      | 596870 rs7906 | 2 |
| AC.GT        | 2 | 96604909  | 96604918  | 5       | .                  | .        | intergenic | .      | rs792073559   | 2 |
| AAAT.ATTT    | 2 | 96615963  | 96615976  | 3.5     | .                  | .        | intergenic | .      | .             | 2 |
| AT.AT        | 2 | 96910853  | 96910863  | 5.5     | .                  | .        | intergenic | 0.292  | 371775 rs7893 | 2 |
| AC.GT        | 2 | 96921142  | 96921151  | 5       | .                  | .        | intergenic | 0.14   | rs793451378   | 2 |
| AAAT.ATTT    | 2 | 96947457  | 96947479  | 5.75    | .                  | .        | intergenic | -0.003 | rs788701061   | 2 |
| AC.GT        | 2 | 97013529  | 97013539  | 5.5     | .                  | .        | intergenic | 0.274  | rs789207491   | 2 |
| AAAC.GTTT    | 2 | 97198791  | 97198810  | 5       | .                  | .        | intergenic | 0.082  | 224432 rs7868 | 3 |
| AAAAAC.GTTTT | 2 | 97298433  | 97298460  | 4.66667 | .                  | .        | intergenic | -0.241 | rs789412756   | 2 |
| AT.AT        | 2 | 97473071  | 97473082  | 6       | ENSSSCT00000015450 | RASA1    | intron     | 0.123  | rs792174805   | 2 |
| AAAT.ATTT    | 2 | 97804026  | 97804043  | 4.5     | .                  | .        | intergenic | -0.001 | rs789139482   | 2 |
| AG.CT        | 2 | 98289036  | 98289046  | 5.5     | ENSSSCT00000015452 | TMEM161E | intron     | .      | .             | 2 |
| AAAAC.GTTTT  | 2 | 98311523  | 98311538  | 3.2     | ENSSSCT00000015452 | TMEM161E | intron     | 0.178  | rs792071667   | 2 |
| AC.GT        | 2 | 98498336  | 98498346  | 5.5     | .                  | .        | intergenic | 0.342  | .             | 3 |
| AAAC.GTTT    | 2 | 98570887  | 98570899  | 3.25    | .                  | .        | intergenic | 0.25   | 214674 rs7927 | 2 |
| AT.AT        | 2 | 98584984  | 98584993  | 5       | .                  | .        | intergenic | 0.021  | rs789813112   | 2 |
| AAAAC.GTTTT  | 2 | 98863087  | 98863110  | 4.8     | ENSSSCT00000015454 | MEF2C    | intron     | 0.04   | rs792802118   | 2 |
| AAAAC.GTTTT  | 2 | 98863087  | 98863110  | 4.8     | ENSSSCT00000015453 | MEF2C    | intron     | 0.04   | rs792802118   | 2 |
| AC.GT        | 2 | 98937453  | 98937469  | 8.5     | .                  | .        | intergenic | 1.648  | .             | 3 |
| AT.AT        | 2 | 99683970  | 99683987  | 9       | .                  | .        | intergenic | -0.101 | rs786503094   | 2 |
| AAAG.CTTT    | 2 | 99982389  | 99982421  | 8.25    | .                  | .        | intergenic | -0.029 | 239713 rs7880 | 2 |
| AT.AT        | 2 | 100350884 | 100350894 | 5.5     | .                  | .        | intergenic | .      | rs786782754   | 2 |
| AAAG.CTTT    | 2 | 100683540 | 100683552 | 3.25    | .                  | .        | intergenic | 0.252  | .             | 3 |
| AT.AT        | 2 | 101240370 | 101240380 | 5.5     | .                  | .        | intergenic | 0.076  | 729622 rs7915 | 3 |
| AC.GT        | 2 | 101250220 | 101250231 | 6       | .                  | .        | intergenic | 0.053  | rs787350983   | 4 |
| AT.AT        | 2 | 101263298 | 101263307 | 5       | .                  | .        | intergenic | .      | rs787642481   | 3 |
| AAAAC.GTTTT  | 2 | 101338989 | 101339010 | 4.4     | .                  | .        | intergenic | .      | 101250 rs7925 | 2 |
| AAAC.GTTT    | 2 | 102559677 | 102559693 | 4.25    | .                  | .        | intergenic | .      | rs787459404   | 2 |
| AAAAT.ATTTT  | 2 | 102646860 | 102646877 | 3.6     | .                  | .        | intergenic | 0.456  | 234453 rs7923 | 2 |
| AC.GT        | 2 | 102738465 | 102738483 | 9.5     | .                  | .        | intergenic | .      | rs788734592   | 2 |
| AAT.ATT      | 2 | 102808990 | 102809003 | 4.66667 | .                  | .        | intergenic | -0.011 | rs788814048   | 2 |
| AGGG.CCCT    | 2 | 102865467 | 102865481 | 3.75    | .                  | .        | intergenic | 0.134  | rs786257739   | 2 |
| AAAT.ATTT    | 2 | 102882358 | 102882372 | 3.75    | .                  | .        | intergenic | 0.184  | 162436 rs7905 | 2 |
| AAT.ATT      | 2 | 103418876 | 103418890 | 5       | .                  | .        | intergenic | 0.412  | rs790498589   | 3 |
| AC.GT        | 2 | 103730279 | 103730289 | 5.5     | .                  | .        | intergenic | 0.475  | .             | 4 |
| AT.AT        | 2 | 104286012 | 104286030 | 9.5     | .                  | .        | intergenic | 0.82   | .             | 4 |
| AC.GT        | 2 | 104476342 | 104476355 | 7       | ENSSSCT00000015467 | .        | intron     | .      | rs791470938   | 2 |
| AC.GT        | 2 | 104479047 | 104479058 | 6       | ENSSSCT00000015467 | .        | intron     | .      | rs791629040   | 2 |
| AT.AT        | 2 | 104518416 | 104518427 | 6       | ENSSSCT00000015467 | .        | intron     | .      | rs793661848   | 2 |
| AG.CT        | 2 | 104780372 | 104780381 | 5       | ENSSSCT00000015470 | KIAA0825 | intron     | .      | .             | 2 |
| AAC.GTT      | 2 | 104812279 | 104812297 | 6.33333 | ENSSSCT00000015470 | KIAA0825 | intron     | 0.189  | rs789456230   | 2 |
| AAC.GTT      | 2 | 104851540 | 104851558 | 6.33333 | ENSSSCT00000015471 | .        | intron     | .      | rs786734939   | 2 |
| AG.CT        | 2 | 105072714 | 105072740 | 13.5    | .                  | .        | intergenic | 0.055  | rs793481303   | 3 |
| AT.AT        | 2 | 105146841 | 105146850 | 5       | ENSSSCT00000015473 | .        | intron     | 0.199  | rs790705430   | 2 |
| AC.GT        | 2 | 105423469 | 105423478 | 5       | .                  | .        | intergenic | .      | .             | 3 |
| AAT.ATT      | 2 | 105429885 | 105429899 | 5       | .                  | .        | intergenic | .      | .             | 2 |
| AAAAC.GTTTT  | 2 | 105447799 | 105447813 | 3       | .                  | .        | intergenic | .      | rs789099024   | 2 |
| AAAAC.CTTTT  | 2 | 105576845 | 105576866 | 4.4     | .                  | .        | intergenic | .      | rs790369614   | 2 |
| AAAAAC.GTTTT | 2 | 106289958 | 106289977 | 3.33333 | .                  | .        | intergenic | .      | rs789590506   | 2 |
| AAAG.CTTT    | 2 | 106295940 | 106295966 | 6.75    | .                  | .        | intergenic | .      | rs786528622   | 2 |
| AC.GT        | 2 | 106356978 | 106356988 | 5.5     | .                  | .        | intergenic | .      | .             | 3 |
| AT.AT        | 2 | 106377861 | 106377871 | 5.5     | .                  | .        | intergenic | .      | 286416 rs7904 | 2 |
| AAAT.ATTT    | 2 | 106944030 | 106944050 | 5.25    | ENSSSCT00000015480 | CAST     | intron     | -0.066 | rs786874369   | 2 |
| AAAT.ATTT    | 2 | 106944030 | 106944050 | 5.25    | ENSSSCT00000015481 | CAST     | intron     | -0.066 | rs786874369   | 2 |
| AAAC.GTTT    | 2 | 106976745 | 106976769 | 6.25    | ENSSSCT00000015480 | CAST     | intron     | 0.107  | rs789069165   | 2 |



|              |   |           |           |         |                    |         |            |        |               |   |
|--------------|---|-----------|-----------|---------|--------------------|---------|------------|--------|---------------|---|
| AAAC.GTTT    | 2 | 106976745 | 106976769 | 6.25    | ENSSSCT00000015481 | CAST    | intron     | 0.107  | rs789069165   | 2 |
| AAAAG.CTTTT  | 2 | 106998233 | 106998251 | 3.8     | ENSSSCT00000015480 | CAST    | intron     | 0.236  | .             | 2 |
| AAAAG.CTTTT  | 2 | 106998233 | 106998251 | 3.8     | ENSSSCT00000015481 | CAST    | intron     | 0.236  | .             | 2 |
| AAC.GTT      | 2 | 107410062 | 107410075 | 4.66667 | ENSSSCT00000015485 | LNPEP   | intron     | 0.179  | rs789503939   | 2 |
| AT.AT        | 2 | 107448433 | 107448462 | 15      | ENSSSCT00000015485 | LNPEP   | intron     | 0.141  | .             | 2 |
| AC.GT        | 2 | 107490885 | 107490898 | 7       | .                  | .       | intergenic | .      | rs793469179   | 4 |
| AC.GT        | 2 | 107767633 | 107767646 | 7       | .                  | .       | intergenic | 0.141  | .             | 3 |
| AAAT.ATTT    | 2 | 108047470 | 108047491 | 5.5     | .                  | .       | intergenic | .      | 300352 rs7891 | 2 |
| AT.AT        | 2 | 108050579 | 108050591 | 6.5     | .                  | .       | intergenic | .      | 117475 rs7863 | 2 |
| AT.AT        | 2 | 108125273 | 108125291 | 9.5     | .                  | .       | intergenic | -0.009 | rs788003837   | 2 |
| AT.AT        | 2 | 108282136 | 108282149 | 7       | .                  | .       | intergenic | -0.016 | 341808 rs7933 | 2 |
| AATT.AATT    | 2 | 108398882 | 108398894 | 3.25    | .                  | .       | intergenic | -0.108 | 380442 rs7934 | 2 |
| AC.GT        | 2 | 108403971 | 108403983 | 6.5     | .                  | .       | intergenic | .      | .             | 3 |
| AAAT.ATTT    | 2 | 108461233 | 108461257 | 6.25    | .                  | .       | intergenic | 0.045  | rs792574788   | 2 |
| ACGT.ACGT    | 2 | 108508748 | 108508769 | 5.5     | .                  | .       | intergenic | .      | rs793871794   | 2 |
| AGGGG.CCCCT  | 2 | 108614513 | 108614534 | 3.66667 | .                  | .       | intergenic | .      | 707191 rs7935 | 2 |
| AAAAC.GTTTT  | 2 | 108783180 | 108783199 | 4       | .                  | .       | intergenic | 0.303  | rs787242763   | 2 |
| ACCT.AGCT    | 2 | 108794860 | 108794886 | 6.75    | .                  | .       | intergenic | -0.01  | 320711 rs7869 | 2 |
| AGAT.AGCT    | 2 | 108963106 | 108963127 | 5.5     | .                  | .       | intergenic | 0.218  | rs791727519   | 2 |
| AC.GT        | 2 | 109196852 | 109196882 | 15.5    | .                  | .       | intergenic | 0.138  | rs788153958   | 3 |
| AAAT.ATTT    | 2 | 109203830 | 109203844 | 3.75    | .                  | .       | intergenic | 0.204  | rs789438488   | 2 |
| AAC.GTT      | 2 | 109261268 | 109261281 | 4.66667 | .                  | .       | intergenic | 0.025  | rs790327634   | 2 |
| AC.GT        | 2 | 109320560 | 109320580 | 10.5    | .                  | .       | intergenic | .      | .             | 4 |
| AG.CT        | 2 | 109326863 | 109326873 | 5.5     | .                  | .       | intergenic | .      | .             | 2 |
| AT.AT        | 2 | 109343225 | 109343236 | 6       | .                  | .       | intergenic | .      | .             | 3 |
| AAAT.ATT     | 2 | 109465133 | 109465144 | 4       | .                  | .       | intergenic | .      | rs792273709   | 2 |
| AAAAAT.ATTTT | 2 | 109666656 | 109666678 | 3.83333 | .                  | .       | intergenic | -0.019 | .             | 2 |
| AAC.GTT      | 2 | 109844582 | 109844599 | 6       | .                  | .       | intergenic | 0.144  | 301371 rs7909 | 2 |
| AC.GT        | 2 | 109855069 | 109855084 | 8       | .                  | .       | intergenic | -0.257 | rs787768386   | 2 |
| AT.AT        | 2 | 109911257 | 109911267 | 5.5     | .                  | .       | intergenic | .      | rs788327364   | 2 |
| AC.GT        | 2 | 110005926 | 110005941 | 8       | .                  | .       | intergenic | 0.045  | 356729 rs7907 | 2 |
| AAAAC.GTTTT  | 2 | 110124328 | 110124352 | 5       | .                  | .       | intergenic | .      | rs786738094   | 2 |
| AAT.ATT      | 2 | 110295032 | 110295046 | 5       | .                  | .       | intergenic | .      | rs792729142   | 2 |
| AAT.ATT      | 2 | 110315482 | 110315493 | 4       | .                  | .       | intergenic | .      | .             | 2 |
| AT.AT        | 2 | 110453019 | 110453035 | 8.5     | .                  | .       | intergenic | .      | rs793153185   | 2 |
| AAT.ATT      | 2 | 110502614 | 110502642 | 9.66667 | .                  | .       | intergenic | 0.156  | rs788335240   | 2 |
| AC.GT        | 2 | 110653683 | 110653700 | 9       | .                  | .       | intergenic | 0.204  | rs788495580   | 4 |
| AG.CT        | 2 | 110672919 | 110672929 | 5.5     | .                  | .       | intergenic | .      | .             | 4 |
| AAAT.ATTT    | 2 | 110732029 | 110732045 | 4.25    | .                  | .       | intergenic | 0.049  | 727472 rs7885 | 2 |
| AAAAC.GTTTT  | 2 | 110819680 | 110819694 | 3       | ENSSSCT00000015492 | ST8SIA4 | intron     | 0.148  | rs789130615   | 2 |
| AG.CT        | 2 | 110834565 | 110834575 | 5.5     | .                  | .       | intergenic | -0.058 | .             | 4 |
| AT.AT        | 2 | 111187011 | 111187044 | 17      | .                  | .       | intergenic | .      | rs791974147   | 2 |
| AT.AT        | 2 | 111400007 | 111400026 | 10      | .                  | .       | intergenic | .      | rs788637213   | 2 |
| AAAC.GTTT    | 2 | 111401995 | 111402013 | 4.75    | .                  | .       | intergenic | .      | 126486 rs7895 | 2 |
| AC.GT        | 2 | 111577881 | 111577895 | 7.5     | .                  | .       | intergenic | 0.121  | rs709236214   | 4 |
| AAAAC.GTTTT  | 2 | 111633491 | 111633520 | 6       | .                  | .       | intergenic | .      | rs712449974   | 2 |
| AAAAAC.GTTTT | 2 | 111710112 | 111710144 | 5.5     | .                  | .       | intergenic | .      | 750976 rs7916 | 2 |
| AAAC.GTTT    | 2 | 112210979 | 112210993 | 3.75    | .                  | .       | intergenic | 0.119  | rs792861842   | 2 |
| ACAG.CTGT    | 2 | 112278010 | 112278041 | 8       | .                  | .       | intergenic | 0.153  | 190365 rs7872 | 2 |
| AT.AT        | 2 | 112630885 | 112630896 | 6       | ENSSSCT00000023670 | .       | intron     | 1.687  | rs790445899   | 4 |
| AAAT.ATTT    | 2 | 112674119 | 112674140 | 5.5     | ENSSSCT00000031964 | PPIP5K2 | intron     | 0.428  | rs788079085   | 2 |
| AAATC.GATTT  | 2 | 112707383 | 112707397 | 3       | ENSSSCT00000031964 | PPIP5K2 | intron     | 0.857  | rs791207217   | 2 |
| AAAC.GTTT    | 2 | 113005023 | 113005037 | 3.75    | .                  | .       | intergenic | .      | 167889 rs7862 | 2 |
| AC.GT        | 2 | 113390421 | 113390431 | 5.5     | .                  | .       | intergenic | 0.452  | .             | 3 |
| AAGG.CCTT    | 2 | 113469173 | 113469199 | 6.75    | .                  | .       | intergenic | .      | 366436 rs7867 | 2 |
| AAAAAT.ATTTT | 2 | 113505382 | 113505400 | 3.16667 | .                  | .       | intergenic | .      | rs791835419   | 2 |
| AAAT.ATTT    | 2 | 113533672 | 113533690 | 4.75    | .                  | .       | intergenic | 0.225  | 300061 rs7933 | 2 |
| AG.CT        | 2 | 113543356 | 113543368 | 6.5     | .                  | .       | intergenic | -0.001 | rs706240333   | 5 |
| AT.AT        | 2 | 113647389 | 113647408 | 10      | .                  | .       | intergenic | -0.177 | .             | 2 |
| AT.AT        | 2 | 113843554 | 113843565 | 6       | .                  | .       | intergenic | .      | rs786461627   | 2 |
| AAAC.GTTT    | 2 | 113870947 | 113870966 | 5       | .                  | .       | intergenic | .      | rs788188893   | 2 |
| AC.GT        | 2 | 114458375 | 114458387 | 6.5     | .                  | .       | intergenic | 0.395  | 398589 rs7934 | 2 |
| AAAC.GTTT    | 2 | 114596454 | 114596468 | 3.75    | .                  | .       | intergenic | .      | rs789199428   | 2 |
| AT.AT        | 2 | 114638600 | 114638617 | 9       | .                  | .       | intergenic | 0.199  | .             | 2 |
| AAG.CTT      | 2 | 114935129 | 114935143 | 5       | .                  | .       | intergenic | -0.064 | 343353 rs7898 | 2 |
| AAT.ATT      | 2 | 115160021 | 115160042 | 7.33333 | .                  | .       | intergenic | 0.084  | 119919 rs7866 | 2 |
| AT.AT        | 2 | 115623023 | 115623033 | 5.5     | .                  | .       | intergenic | -0.121 | rs792364414   | 4 |
| AAAG.CTTT    | 2 | 115670186 | 115670200 | 3.75    | .                  | .       | intergenic | -0.072 | .             | 2 |
| AAAC.GTTT    | 2 | 115692090 | 115692108 | 4.75    | .                  | .       | intergenic | -0.259 | rs790793268   | 2 |
| AAAC.GTTT    | 2 | 115777817 | 115777840 | 6       | .                  | .       | intergenic | .      | 213259 rs7864 | 2 |
| AC.GT        | 2 | 116107626 | 116107646 | 10.5    | .                  | .       | intergenic | -0.136 | rs788652233   | 2 |
| AAAT.ATTT    | 2 | 116130021 | 116130038 | 4.5     | .                  | .       | intergenic | .      | 203877 rs6958 | 2 |
| AAAAC.GTTTT  | 2 | 116180497 | 116180517 | 4.2     | .                  | .       | intergenic | .      | 170123 rs7890 | 2 |
| AT.AT        | 2 | 116212592 | 116212603 | 6       | .                  | .       | intergenic | 0.352  | rs789209556   | 2 |
| AT.AT        | 2 | 116366924 | 116366934 | 5.5     | .                  | .       | intergenic | 0.051  | rs792500992   | 2 |
| AAAAC.GTTTT  | 2 | 116444040 | 116444063 | 4.8     | .                  | .       | intergenic | -0.029 | 790338 rs7890 | 2 |
| AAC.GTT      | 2 | 116775772 | 116775787 | 5.33333 | .                  | .       | intergenic | 0.816  | rs787324845   | 2 |
| AAAC.GTTT    | 2 | 116819388 | 116819406 | 4.75    | .                  | .       | intergenic | 0.571  | rs793193137   | 2 |
| AT.AT        | 2 | 116826835 | 116826847 | 6.5     | .                  | .       | intergenic | 0.229  | .             | 4 |
| AC.GT        | 2 | 116843680 | 116843695 | 8       | .                  | .       | intergenic | -0.16  | rs789878250   | 2 |
| AG.CT        | 2 | 116949338 | 116949361 | 12      | .                  | .       | intergenic | 0.7    | rs793869426   | 3 |
| AAAAC.GTTTT  | 2 | 117031815 | 117031837 | 4.6     | .                  | .       | intergenic | .      | rs787514192   | 2 |
| AT.AT        | 2 | 117141521 | 117141532 | 6       | .                  | .       | intergenic | -0.059 | .             | 2 |
| AAAAG.CTTTT  | 2 | 117392477 | 117392497 | 4.2     | .                  | .       | intergenic | 0.023  | 379412 rs6999 | 2 |

|             |   |           |           |         |                    |         |            |        |                    |   |
|-------------|---|-----------|-----------|---------|--------------------|---------|------------|--------|--------------------|---|
| AT.AT       | 2 | 117640441 | 117640450 | 5       | .                  | .       | intergenic | 1.029  | rs790091226        | 2 |
| AAAAC.GTTTT | 2 | 117970155 | 117970177 | 3.83333 | .                  | .       | intergenic | 0.072  | .                  | 2 |
| AACAC.GTGTT | 2 | 118035056 | 118035076 | 4.2     | .                  | .       | intergenic | 0.069  | .                  | 2 |
| AT.AT       | 2 | 118202850 | 118202867 | 9       | .                  | .       | intergenic | 0.118  | rs786486354        | 2 |
| AAC.GTT     | 2 | 118224845 | 118224858 | 4.66667 | .                  | .       | intergenic | -0.049 | rs735519 rs7863    | 2 |
| AC.GT       | 2 | 118469412 | 118469422 | 5.5     | .                  | .       | intergenic | 0.03   | rs791496726        | 3 |
| AC.GT       | 2 | 118469546 | 118469561 | 8       | .                  | .       | intergenic | 0.036  | rs793556738        | 2 |
| AAAC.GTTT   | 2 | 118672185 | 118672215 | 7.75    | ENSSSCT00000024375 | .       | intron     | 0.056  | rs793197428        | 2 |
| AATGG.CCATT | 2 | 119040191 | 119040207 | 3.4     | .                  | .       | intergenic | 0.177  | rs789752835        | 2 |
| AT.AT       | 2 | 119071434 | 119071443 | 5       | .                  | .       | intergenic | -0.122 | rs786960014        | 2 |
| AAAT.ATTT   | 2 | 119098310 | 119098326 | 4.25    | .                  | .       | intergenic | 0.412  | rs793393784        | 2 |
| AC.GT       | 2 | 119121377 | 119121387 | 5.5     | .                  | .       | intergenic | 0.18   | rs792550630        | 3 |
| AAAAC.GTTTT | 2 | 119159753 | 119159767 | 3       | ENSSSCT00000015510 | MAN2A1  | intron     | -0.165 | .                  | 2 |
| AAAAC.GTTTT | 2 | 119166131 | 119166162 | 6.4     | ENSSSCT00000015510 | MAN2A1  | intron     | 1.006  | rs786697 rs7936    | 2 |
| AT.AT       | 2 | 119179390 | 119179400 | 5.5     | ENSSSCT00000015510 | MAN2A1  | intron     | 0.041  | rs786908687        | 2 |
| AAT.ATT     | 2 | 119317239 | 119317251 | 4.33333 | .                  | .       | intergenic | 0.252  | rs726433 rs7918    | 2 |
| AAAC.GTTT   | 2 | 119387918 | 119387954 | 9.25    | .                  | .       | intergenic | 0.057  | rs7854001 rs7864   | 2 |
| AC.GT       | 2 | 119514160 | 119514172 | 6.5     | .                  | .       | intergenic | 0.113  | rs793192548        | 2 |
| AT.AT       | 2 | 119566374 | 119566391 | 9       | .                  | .       | intergenic | 0.065  | .                  | 2 |
| AAAT.ATTT   | 2 | 119699843 | 119699860 | 4.5     | .                  | .       | intergenic | .      | rs789752809        | 2 |
| AC.GT       | 2 | 120182656 | 120182670 | 7.5     | .                  | .       | intergenic | 0.228  | rs791183985        | 3 |
| AT.AT       | 2 | 120665090 | 120665099 | 5       | .                  | .       | intergenic | 0.025  | .                  | 2 |
| AAAC.GTTT   | 2 | 120689640 | 120689655 | 4       | .                  | .       | intergenic | 1.202  | rs790989 rs7892    | 2 |
| AAAC.GTTT   | 2 | 120695062 | 120695074 | 3.25    | .                  | .       | intergenic | .      | rs789230194        | 2 |
| AAAAG.CTTTT | 2 | 120754653 | 120754670 | 3.6     | .                  | .       | intergenic | .      | rs727333 rs7911    | 2 |
| AAAC.GTTT   | 2 | 120837268 | 120837294 | 6.75    | ENSSSCT00000015517 | STARD4  | intron     | 0.168  | rs7844825 rs7895   | 2 |
| AC.GT       | 2 | 121219879 | 121219895 | 8.5     | .                  | .       | intergenic | -0.022 | rs793759024        | 2 |
| AAAC.GTTT   | 2 | 121308524 | 121308556 | 8.25    | ENSSSCT00000015519 | .       | intron     | -0.235 | rs788608403        | 2 |
| AC.GT       | 2 | 121399949 | 121399961 | 6.5     | ENSSSCT00000015522 | DCP2    | intron     | .      | .                  | 3 |
| AACAC.GTGTT | 2 | 121444651 | 121444672 | 3.66667 | .                  | .       | intergenic | .      | rs792581952        | 2 |
| AAAC.GTTT   | 2 | 121496287 | 121496307 | 5.25    | ENSSSCT00000024663 | REEP5   | intron     | 0.022  | rs754657 rs7917    | 2 |
| AAAAC.GTTTT | 2 | 121504373 | 121504392 | 4       | ENSSSCT00000024663 | REEP5   | intron     | 0.141  | rs7846399 rs7886   | 2 |
| AAAC.GTTT   | 2 | 121715873 | 121715886 | 3.5     | .                  | .       | intergenic | -0.071 | rs7841914 rs7867   | 2 |
| AAT.ATT     | 2 | 121824381 | 121824401 | 7       | .                  | .       | intergenic | -0.028 | rs78330681 rs7910  | 2 |
| AAAT.ATTT   | 2 | 122120626 | 122120640 | 3.75    | .                  | .       | intergenic | .      | rs787224512        | 2 |
| AT.AT       | 2 | 122654697 | 122654719 | 11.5    | ENSSSCT00000015529 | YTHDC2  | intron     | -0.523 | rs78786803952      | 2 |
| AAAAC.GTTTT | 2 | 123057242 | 123057259 | 3.6     | .                  | .       | intergenic | .      | rs793153801        | 4 |
| AAAC.GTTT   | 2 | 123574647 | 123574665 | 4.75    | ENSSSCT00000015531 | KCNN2   | intron     | 0.066  | rs78120795 rs7886  | 2 |
| AC.GT       | 2 | 123610233 | 123610245 | 6.5     | ENSSSCT00000015531 | KCNN2   | intron     | -0.093 | rs792098484        | 2 |
| AC.GT       | 2 | 123865264 | 123865275 | 6       | .                  | .       | intergenic | 0.152  | rs791076455        | 2 |
| AAAC.GTTT   | 2 | 124082792 | 124082806 | 3.75    | .                  | .       | intergenic | -0.007 | rs786799441        | 2 |
| AC.GT       | 2 | 124148607 | 124148625 | 9.5     | ENSSSCT00000032987 | TRIM36  | intron     | 0.551  | .                  | 4 |
| AC.GT       | 2 | 124148607 | 124148625 | 9.5     | ENSSSCT00000015532 | TRIM36  | intron     | 0.551  | .                  | 4 |
| AC.GT       | 2 | 124148607 | 124148625 | 9.5     | ENSSSCT00000033618 | TRIM36  | intron     | 0.551  | .                  | 4 |
| AG.CT       | 2 | 124196224 | 124196234 | 5.5     | .                  | .       | intergenic | -0.06  | .                  | 4 |
| AC.GT       | 2 | 124522674 | 124522693 | 10      | .                  | .       | intergenic | -0.103 | rs705370534        | 3 |
| AC.GT       | 2 | 124608255 | 124608271 | 8.5     | .                  | .       | intergenic | 0.721  | rs789375819        | 3 |
| AG.CT       | 2 | 124672349 | 124672361 | 6.5     | .                  | .       | intergenic | .      | rs7896864 rs7884   | 2 |
| AT.AT       | 2 | 125114712 | 125114722 | 5.5     | .                  | .       | intergenic | .      | .                  | 3 |
| AAAC.GTTT   | 2 | 125168380 | 125168400 | 5.25    | ENSSSCT00000015541 | COMMD10 | intron     | .      | rs78957169 rs7902  | 2 |
| AAAT.ATTT   | 2 | 125315456 | 125315472 | 4.25    | ENSSSCT00000015541 | COMMD10 | intron     | 0.113  | .                  | 2 |
| AG.CT       | 2 | 125334672 | 125334683 | 6       | ENSSSCT00000015541 | COMMD10 | 3'utr      | 0.277  | rs789380906 rs7876 | 2 |
| AC.GT       | 2 | 125535731 | 125535743 | 6.5     | .                  | .       | intergenic | -0.015 | rs78952396 rs7899  | 2 |
| AT.AT       | 2 | 125539062 | 125539072 | 5.5     | .                  | .       | intergenic | 0.027  | rs788402560        | 2 |
| AAAC.GTTT   | 2 | 125674898 | 125674924 | 6.75    | .                  | .       | intergenic | .      | rs789349793 rs7874 | 2 |
| AT.AT       | 2 | 126022949 | 126022973 | 12.5    | .                  | .       | intergenic | -0.032 | rs792901839        | 2 |
| AC.GT       | 2 | 126173053 | 126173065 | 6.5     | .                  | .       | intergenic | 0.013  | rs788290583        | 2 |
| AAAAC.GTTTT | 2 | 126173558 | 126173577 | 4       | .                  | .       | intergenic | 0.213  | rs7878462176       | 2 |
| AAC.GTT     | 2 | 126179786 | 126179801 | 5.33333 | .                  | .       | intergenic | 0.047  | rs792654605        | 2 |
| AT.AT       | 2 | 126179853 | 126179874 | 11      | .                  | .       | intergenic | 0.103  | rs790898190        | 4 |
| AAC.GTT     | 2 | 126327480 | 126327491 | 4       | .                  | .       | intergenic | .      | .                  | 3 |
| AAAG.CTTT   | 2 | 126620593 | 126620607 | 3.75    | .                  | .       | intergenic | .      | rs786673385        | 2 |
| AGAT.ATCT   | 2 | 126876553 | 126876569 | 4.25    | .                  | .       | intergenic | 0.056  | rs7844900 rs7869   | 2 |
| AAAC.GTTT   | 2 | 126933047 | 126933066 | 5       | .                  | .       | intergenic | -0.089 | rs786486249 rs7864 | 2 |
| AC.GT       | 2 | 126992872 | 126992886 | 7.5     | .                  | .       | intergenic | -0.09  | .                  | 3 |
| AAC.GTT     | 2 | 127041741 | 127041759 | 6.33333 | .                  | .       | intergenic | -0.066 | rs788319300        | 3 |
| AAAC.GTTT   | 2 | 127234226 | 127234244 | 4.75    | .                  | .       | intergenic | -0.067 | rs790690697        | 2 |
| AAAC.GTTT   | 2 | 127354602 | 127354626 | 6.25    | .                  | .       | intergenic | -0.17  | rs79334456 rs7937  | 3 |
| AAC.GTT     | 2 | 127412442 | 127412454 | 4.33333 | .                  | .       | intergenic | .      | .                  | 3 |
| AG.CT       | 2 | 127482934 | 127482948 | 7.5     | .                  | .       | intergenic | -0.121 | .                  | 4 |
| AG.CT       | 2 | 127597412 | 127597426 | 7.5     | .                  | .       | intergenic | -0.133 | rs793106507        | 4 |
| AAAAT.ATTTT | 2 | 127665716 | 127665738 | 4.6     | .                  | .       | intergenic | -0.146 | rs793019019        | 2 |
| AG.CT       | 2 | 127865305 | 127865325 | 10.5    | .                  | .       | intergenic | -0.091 | rs79319676 rs7905  | 2 |
| AAAAC.GTTTT | 2 | 128473037 | 128473055 | 3.8     | ENSSSCT00000024571 | DMXL1   | intron     | 3.213  | .                  | 2 |
| AAAAC.GTTTT | 2 | 128473037 | 128473055 | 3.8     | ENSSSCT00000031873 | DMXL1   | intron     | 3.213  | .                  | 2 |
| AAC.GTT     | 2 | 128478373 | 128478386 | 4.66667 | ENSSSCT00000024571 | DMXL1   | intron     | 0.21   | rs793551464        | 2 |
| AAC.GTT     | 2 | 128478373 | 128478386 | 4.66667 | ENSSSCT00000031873 | DMXL1   | intron     | 0.21   | rs793551464        | 2 |
| AAAC.GTTT   | 2 | 128573798 | 128573826 | 7.25    | .                  | .       | intergenic | 0.334  | rs790281105        | 3 |
| AAC.GTT     | 2 | 128677501 | 128677514 | 4.66667 | .                  | .       | intergenic | 0.084  | rs789591912        | 2 |
| AAAC.GTTT   | 2 | 128708245 | 128708267 | 5.75    | .                  | .       | intergenic | 0.032  | rs78959991 rs7862  | 2 |
| AC.GT       | 2 | 128753742 | 128753752 | 5.5     | ENSSSCT00000025027 | HSD17B4 | intron     | 0.124  | rs790541007        | 2 |
| AC.GT       | 2 | 128755284 | 128755294 | 5.5     | ENSSSCT00000025027 | HSD17B4 | intron     | 0.312  | rs788549768        | 2 |
| AAAAC.GTTTT | 2 | 128845030 | 128845048 | 3.8     | .                  | .       | intergenic | 0.082  | rs792727439        | 2 |
| AGC.GCT     | 2 | 128964866 | 128964882 | 5.66667 | .                  | .       | intergenic | 0.219  | rs791019146        | 2 |

|             |   |           |           |         |                    |         |            |        |             |   |
|-------------|---|-----------|-----------|---------|--------------------|---------|------------|--------|-------------|---|
| AAAT.ATTT   | 2 | 129408735 | 129408752 | 4.5     | .                  | .       | intergenic | 0.065  | rs789052992 | 2 |
| AAC.GTT     | 2 | 129556017 | 129556030 | 4.66667 | .                  | .       | intergenic | .      | rs790281040 | 2 |
| AC.GT       | 2 | 129693736 | 129693754 | 9.5     | .                  | .       | intergenic | -0.043 | rs699670189 | 2 |
| AC.GT       | 2 | 129701984 | 129702000 | 8.5     | .                  | .       | intergenic | .      | rs790872116 | 5 |
| AT.AT       | 2 | 129708046 | 129708057 | 6       | .                  | .       | intergenic | 0.059  | rs792458306 | 2 |
| AAC.GTT     | 2 | 129980338 | 129980357 | 6.66667 | .                  | .       | intergenic | 0.174  | rs787785534 | 2 |
| AAAC.GTTT   | 2 | 130187670 | 130187684 | 3.75    | .                  | .       | intergenic | 0.022  | rs7871      | 2 |
| AAC.GTT     | 2 | 130258738 | 130258761 | 8       | .                  | .       | intergenic | .      | rs7894      | 4 |
| AAAC.GTTT   | 2 | 130269063 | 130269082 | 5       | .                  | .       | intergenic | -0.033 | rs7876      | 2 |
| AAAT.ATTT   | 2 | 130375001 | 130375023 | 5.75    | .                  | .       | intergenic | .      | rs788711845 | 2 |
| AC.GT       | 2 | 130579437 | 130579448 | 6       | .                  | .       | intergenic | .      | rs792860786 | 2 |
| ACAT.ATGT   | 2 | 130658533 | 130658553 | 5.25    | .                  | .       | intergenic | .      | rs7914      | 2 |
| AAAC.GTTT   | 2 | 130790724 | 130790751 | 7       | .                  | .       | intergenic | 0.054  | rs793190127 | 2 |
| AG.CT       | 2 | 130878828 | 130878838 | 5.5     | .                  | .       | intergenic | 0.097  | .           | 2 |
| AT.AT       | 2 | 130968260 | 130968282 | 11.5    | ENSSSCT00000015551 | ZNF474  | intron     | .      | rs793046460 | 3 |
| AATC.GATT   | 2 | 131004834 | 131004856 | 5.75    | ENSSSCT00000015551 | ZNF474  | intron     | 0.193  | rs789209563 | 2 |
| AC.GT       | 2 | 131028832 | 131028844 | 6.5     | .                  | .       | intergenic | 0.03   | rs7904      | 5 |
| AAAC.GTTT   | 2 | 131238049 | 131238072 | 6       | .                  | .       | intergenic | -0.011 | .           | 2 |
| AAAC.GTTT   | 2 | 131333140 | 131333154 | 3.75    | .                  | .       | intergenic | 0.239  | rs787928283 | 2 |
| AAAT.ATTT   | 2 | 131363091 | 131363105 | 3.75    | .                  | .       | intergenic | -0.001 | rs792152902 | 2 |
| AC.GT       | 2 | 131422643 | 131422653 | 5.5     | .                  | .       | intergenic | 0.289  | rs793083329 | 2 |
| ACT.AGT     | 2 | 131616834 | 131616846 | 4.33333 | ENSSSCT00000022941 | SNX24   | intron     | .      | .           | 2 |
| AAC.GTT     | 2 | 132021017 | 132021035 | 6.33333 | .                  | .       | intergenic | 0.007  | rs7887      | 2 |
| AAC.GTT     | 2 | 132256822 | 132256842 | 7       | ENSSSCT00000015559 | CEP120  | intron     | .      | rs792433916 | 2 |
| AAAC.GTTT   | 2 | 132270130 | 132270148 | 4.75    | ENSSSCT00000015559 | CEP120  | promoter   | -0.03  | rs788946824 | 2 |
| AC.GT       | 2 | 132284239 | 132284251 | 6.5     | .                  | .       | intergenic | 0.154  | .           | 2 |
| AT.AT       | 2 | 132429857 | 132429867 | 5.5     | ENSSSCT00000015560 | CSNK1G3 | intron     | .      | rs793095934 | 2 |
| AT.AT       | 2 | 132509099 | 132509108 | 5       | .                  | .       | intergenic | .      | rs786234465 | 2 |
| AC.GT       | 2 | 132731283 | 132731299 | 8.5     | .                  | .       | intergenic | 0.627  | rs787127780 | 2 |
| AAAT.ATTT   | 2 | 132834587 | 132834606 | 5       | .                  | .       | intergenic | .      | rs788475441 | 2 |
| AG.CT       | 2 | 132859201 | 132859213 | 6.5     | .                  | .       | intergenic | 0.611  | rs7878      | 2 |
| AAAG.CTTT   | 2 | 132893556 | 132893578 | 5.75    | .                  | .       | intergenic | .      | rs788594393 | 2 |
| AGAT.ATCT   | 2 | 133000604 | 133000618 | 3.75    | .                  | .       | intergenic | -0.062 | rs793361947 | 2 |
| AC.GT       | 2 | 133428616 | 133428632 | 8.5     | .                  | .       | intergenic | 0.057  | .           | 2 |
| AAAC.GTTT   | 2 | 133439155 | 133439167 | 3.25    | .                  | .       | intergenic | 0.62   | rs787653517 | 2 |
| AAAAC.GTTTT | 2 | 133692948 | 133692970 | 4.6     | .                  | .       | intergenic | 0.3    | .           | 2 |
| AG.CT       | 2 | 133799279 | 133799291 | 6.5     | .                  | .       | intergenic | -0.004 | rs791389286 | 2 |
| AC.GT       | 2 | 133953510 | 133953520 | 5.5     | .                  | .       | intergenic | 0.165  | rs792346572 | 2 |
| AAC.GTT     | 2 | 134035022 | 134035044 | 7.66667 | .                  | .       | intergenic | 0.206  | rs793574441 | 3 |
| AT.AT       | 2 | 134173099 | 134173108 | 5       | .                  | .       | intergenic | .      | .           | 3 |
| AAAC.GTTT   | 2 | 134210094 | 134210116 | 5.75    | .                  | .       | intergenic | 0.138  | rs7916      | 2 |
| AAAAC.GTTTT | 2 | 134360602 | 134360630 | 5.8     | .                  | .       | intergenic | 0.423  | rs789286998 | 3 |
| AT.AT       | 2 | 134404454 | 134404464 | 5.5     | .                  | .       | intergenic | .      | rs697954378 | 2 |
| AG.CT       | 2 | 134856073 | 134856083 | 5.5     | .                  | .       | intergenic | 0.074  | .           | 2 |
| AG.CT       | 2 | 134876380 | 134876390 | 5.5     | .                  | .       | intergenic | 0.158  | rs790946789 | 2 |
| AAT.ATT     | 2 | 134954672 | 134954684 | 4.33333 | ENSSSCT00000015567 | ALDH7A1 | intron     | -0.206 | .           | 2 |
| AAAT.ATTT   | 2 | 135010207 | 135010221 | 3.75    | ENSSSCT00000027284 | .       | promoter   | .      | rs793780625 | 2 |
| AAAT.ATTT   | 2 | 135010207 | 135010221 | 3.75    | ENSSSCT00000015564 | PHAX    | promoter   | .      | rs793780625 | 2 |
| AAAAC.GTTTT | 2 | 135040272 | 135040296 | 4.16667 | .                  | .       | intergenic | .      | rs7900      | 2 |
| AAAC.GTTT   | 2 | 135051362 | 135051379 | 4.5     | .                  | .       | intergenic | -0.176 | rs792041744 | 2 |
| AG.CT       | 2 | 135280185 | 135280200 | 8       | ENSSSCT00000015569 | 3-Mar   | intron     | 0.042  | rs790987669 | 4 |
| AT.AT       | 2 | 135503406 | 135503415 | 5       | .                  | .       | intergenic | 0.16   | rs787549409 | 2 |
| AG.CT       | 2 | 135525979 | 135525990 | 6       | ENSSSCT00000015571 | MEGF10  | intron     | 0.157  | .           | 2 |
| AAT.ATT     | 2 | 135675469 | 135675494 | 8.66667 | .                  | .       | intergenic | 0.163  | rs789366242 | 2 |
| AT.AT       | 2 | 135697971 | 135697980 | 5       | .                  | .       | intergenic | 0.633  | rs786483060 | 2 |
| AG.CT       | 2 | 135807598 | 135807608 | 5.5     | ENSSSCT00000015573 | .       | intron     | 0.237  | .           | 2 |
| AT.AT       | 2 | 135820037 | 135820048 | 6       | ENSSSCT00000015573 | .       | intron     | 0.079  | rs789643106 | 2 |
| AT.AT       | 2 | 135862431 | 135862442 | 6       | .                  | .       | intergenic | .      | rs789299756 | 3 |
| AT.AT       | 2 | 135892277 | 135892288 | 6       | .                  | .       | intergenic | 0.127  | rs793047990 | 2 |
| AC.GT       | 2 | 135972378 | 135972388 | 5.5     | .                  | .       | intergenic | 0.15   | .           | 5 |
| AAAT.ATTT   | 2 | 136043441 | 136043468 | 7       | .                  | .       | intergenic | 0.136  | rs7932      | 2 |
| ACAT.ATGT   | 2 | 136129985 | 136129999 | 3.75    | .                  | .       | intergenic | .      | .           | 2 |
| AAAAC.GTTTT | 2 | 136276192 | 136276215 | 4.8     | .                  | .       | intergenic | .      | rs7876      | 2 |
| AAAAC.GTTTT | 2 | 136784372 | 136784388 | 3.4     | .                  | .       | intergenic | .      | rs792637807 | 2 |
| AC.GT       | 2 | 137125465 | 137125477 | 6.5     | ENSSSCT00000015578 | SLC27A6 | intron     | 0.155  | rs793052762 | 3 |
| AAAC.GTTT   | 2 | 137280821 | 137280835 | 3.75    | .                  | .       | intergenic | -0.14  | rs7929      | 2 |
| ACAG.CTGT   | 2 | 137348183 | 137348200 | 4.5     | .                  | .       | intergenic | 0.034  | rs793696240 | 2 |
| AT.AT       | 2 | 137364402 | 137364412 | 5.5     | .                  | .       | intergenic | -0.033 | rs695934974 | 2 |
| AG.CT       | 2 | 137814855 | 137814865 | 5.5     | .                  | .       | intergenic | -0.035 | rs792619456 | 2 |
| AAAT.ATTT   | 2 | 138210174 | 138210188 | 3.75    | .                  | .       | intergenic | 0.075  | rs793813022 | 2 |
| AAAAC.GTTTT | 2 | 138250854 | 138250881 | 5.6     | .                  | .       | intergenic | 0.033  | .           | 2 |
| AAAC.GTTT   | 2 | 138451864 | 138451879 | 4       | .                  | .       | intergenic | .      | .           | 2 |
| AT.AT       | 2 | 138455244 | 138455255 | 6       | .                  | .       | intergenic | 0.241  | rs7910      | 2 |
| AG.CT       | 2 | 138581383 | 138581393 | 5.5     | .                  | .       | intergenic | .      | .           | 2 |
| AAAAT.ATTTT | 2 | 138744956 | 138744976 | 4.2     | .                  | .       | intergenic | .      | rs7915      | 2 |
| AC.GT       | 2 | 138766520 | 138766529 | 5       | .                  | .       | intergenic | 0.164  | rs7868      | 2 |
| AC.GT       | 2 | 138773416 | 138773430 | 7.5     | .                  | .       | intergenic | .      | rs693953193 | 2 |
| AC.GT       | 2 | 138796719 | 138796730 | 6       | .                  | .       | intergenic | 0.231  | rs788595361 | 2 |
| AAAAC.GTTTT | 2 | 138840338 | 138840356 | 3.8     | ENSSSCT00000029538 | LYRM7   | intron     | 0.008  | rs7918      | 2 |
| AAAAC.GTTTT | 2 | 138840338 | 138840356 | 3.8     | ENSSSCT00000015586 | LYRM7   | intron     | 0.008  | rs7918      | 2 |
| AAC.GTT     | 2 | 138841055 | 138841069 | 5       | ENSSSCT00000029538 | LYRM7   | intron     | .      | rs704753358 | 2 |
| AAC.GTT     | 2 | 138841055 | 138841069 | 5       | ENSSSCT00000015586 | LYRM7   | intron     | .      | rs704753358 | 2 |
| AC.GT       | 2 | 138897038 | 138897048 | 5.5     | ENSSSCT00000029538 | LYRM7   | intron     | -0.124 | .           | 2 |
| AC.GT       | 2 | 138897038 | 138897048 | 5.5     | ENSSSCT00000015586 | LYRM7   | intron     | -0.124 | .           | 2 |

|             |   |           |           |         |                    |          |            |        |                  |   |
|-------------|---|-----------|-----------|---------|--------------------|----------|------------|--------|------------------|---|
| AC.GT       | 2 | 138965710 | 138965724 | 7.5     | .                  | .        | intergenic | -0.131 | rs789032086      | 2 |
| AC.GT       | 2 | 139033382 | 139033392 | 5.5     | ENSSSCT00000015589 | .        | intron     | 0.069  | rs789871950      | 2 |
| AAAAC.GTTTT | 2 | 139122618 | 139122641 | 4.8     | ENSSSCT00000015589 | .        | intron     | -0.075 | rs786355878      | 3 |
| AC.GT       | 2 | 139162213 | 139162230 | 9       | .                  | .        | intergenic | .      | rs791964182      | 4 |
| AG.CT       | 2 | 139255479 | 139255493 | 7.5     | .                  | .        | intergenic | 0.163  | rs789293520      | 2 |
| AC.GT       | 2 | 139288429 | 139288442 | 7       | ENSSSCT00000015591 | .        | intron     | 0.018  | rs73026 rs7882   | 2 |
| AAAC.GTTT   | 2 | 139601896 | 139601914 | 4.75    | ENSSSCT00000015595 | ACSL6    | intron     | .      | rs786903236      | 2 |
| AT.AT       | 2 | 139785510 | 139785521 | 6       | .                  | .        | intergenic | .      | rs727631 rs7932  | 3 |
| AAC.GTT     | 2 | 139825125 | 139825145 | 7       | .                  | .        | intergenic | .      | rs791546835      | 2 |
| AAAT.ATTT   | 2 | 139837744 | 139837765 | 5.5     | .                  | .        | intergenic | 0.242  | rs788323812      | 2 |
| AAAC.GTTT   | 2 | 140525566 | 140525580 | 3.75    | ENSSSCT00000015606 | KIF3A    | intron     | .      | rs763192 rs7930  | 2 |
| AT.AT       | 2 | 140539653 | 140539670 | 9       | ENSSSCT00000015606 | KIF3A    | promoter   | 0.165  | rs7121994 rs7911 | 2 |
| AT.AT       | 2 | 140805863 | 140805872 | 5       | ENSSSCT00000015614 | AFF4     | promoter   | 0.251  | rs790238897      | 3 |
| AT.AT       | 2 | 140805863 | 140805872 | 5       | ENSSSCT00000025744 | AFF4     | promoter   | 0.251  | rs790238897      | 3 |
| ACGC.GCGT   | 2 | 141353699 | 141353721 | 5.75    | .                  | .        | intergenic | 0.099  | rs793265536      | 2 |
| AG.CT       | 2 | 141556785 | 141556794 | 5       | .                  | .        | intergenic | 0.032  | rs788849095      | 3 |
| AC.GT       | 2 | 141579260 | 141579283 | 12      | .                  | .        | intergenic | -0.135 | rs789958594      | 2 |
| AC.GT       | 2 | 141608854 | 141608873 | 10      | .                  | .        | intergenic | -0.308 | rs781841 rs7863  | 2 |
| AGAGG.CCTCT | 2 | 141792493 | 141792513 | 4.2     | .                  | .        | intergenic | -0.231 | rs708884046      | 2 |
| AC.GT       | 2 | 141876073 | 141876096 | 12      | .                  | .        | intergenic | -0.333 | .                | 3 |
| AAC.GTT     | 2 | 142127357 | 142127371 | 5       | .                  | .        | intergenic | 0.303  | rs713701373      | 2 |
| AAAT.ATTT   | 2 | 142538975 | 142538998 | 6       | ENSSSCT00000015628 | SEC24A   | intron     | .      | rs788718625      | 2 |
| AAAAG.CTTTT | 2 | 142830941 | 142830964 | 4.8     | .                  | .        | intergenic | -0.035 | rs786737717      | 2 |
| AT.AT       | 2 | 143209588 | 143209598 | 5.5     | .                  | .        | intergenic | 0.131  | rs792095743      | 2 |
| AAT.ATT     | 2 | 143211310 | 143211331 | 7.33333 | .                  | .        | intergenic | 0.276  | rs791277432      | 2 |
| AT.AT       | 2 | 143563405 | 143563415 | 5.5     | .                  | .        | intergenic | -0.076 | .                | 2 |
| AAAC.GTTT   | 2 | 143635743 | 143635759 | 4.25    | .                  | .        | intergenic | -0.154 | rs792468617      | 2 |
| ACGC.GCGT   | 2 | 143995095 | 143995108 | 3.5     | ENSSSCT00000015644 | TRPC7    | intron     | 0.361  | rs795737 rs7888  | 2 |
| AC.GT       | 2 | 144158639 | 144158648 | 5       | .                  | .        | intergenic | 0.319  | rs7153536 rs7936 | 2 |
| AC.GT       | 2 | 144170404 | 144170418 | 7.5     | .                  | .        | intergenic | .      | rs792282596      | 3 |
| ACCC.GGGT   | 2 | 144268253 | 144268264 | 3       | .                  | .        | intergenic | 0.108  | rs793429257      | 2 |
| AG.CT       | 2 | 144404527 | 144404555 | 14.5    | .                  | .        | intergenic | -0.078 | rs7174708 rs7123 | 3 |
| AAAC.GTTT   | 2 | 144611061 | 144611079 | 4.75    | .                  | .        | intergenic | -0.002 | rs789268881      | 2 |
| AGCCC.GGGCT | 2 | 144783280 | 144783300 | 4.2     | .                  | .        | intergenic | -0.195 | rs791339273      | 2 |
| AAG.CTT     | 2 | 145076775 | 145076789 | 5       | .                  | .        | intergenic | -0.266 | rs734500 rs7863  | 2 |
| AG.CT       | 2 | 145129821 | 145129830 | 5       | .                  | .        | intergenic | 1.037  | rs787978768      | 2 |
| AT.AT       | 2 | 145152866 | 145152877 | 6       | .                  | .        | intergenic | 0.033  | rs792918444      | 2 |
| AAAG.CTTT   | 2 | 145488945 | 145488959 | 3.75    | .                  | .        | intergenic | 0.138  | rs7105194 rs7901 | 2 |
| AC.GT       | 2 | 145596330 | 145596339 | 5       | .                  | .        | intergenic | 0.269  | rs793844919      | 2 |
| AC.GT       | 2 | 145605825 | 145605834 | 5       | .                  | .        | intergenic | .      | rs788318125      | 2 |
| AAAC.GTTT   | 2 | 145799402 | 145799418 | 4.25    | .                  | .        | intergenic | 0.244  | rs786362690      | 2 |
| AT.AT       | 2 | 145809839 | 145809854 | 8       | .                  | .        | intergenic | .      | rs790435166      | 2 |
| AAAT.ATTT   | 2 | 146250761 | 146250775 | 3.75    | .                  | .        | intergenic | 0.195  | .                | 2 |
| AAAG.CTTT   | 2 | 146263014 | 146263039 | 6.5     | .                  | .        | intergenic | 0.235  | rs77924 rs7886   | 2 |
| AAAAG.CTTTT | 2 | 146469037 | 146469062 | 4.33333 | ENSSSCT00000015666 | CTNNA1   | intron     | .      | rs789720401      | 2 |
| AAAAC.GTTTT | 2 | 146830501 | 146830529 | 4.83333 | .                  | .        | intergenic | .      | rs762183 rs7920  | 2 |
| AC.GT       | 2 | 147077974 | 147077983 | 5       | ENSSSCT00000031093 | PAIP2    | intron     | .      | rs787080 rs7878  | 2 |
| AAG.CTT     | 2 | 147158302 | 147158318 | 5.66667 | ENSSSCT00000015680 | ECSCR    | intron     | 0.134  | rs7380032 rs7894 | 2 |
| AAAC.GTTT   | 2 | 148012640 | 148012661 | 5.5     | ENSSSCT00000023543 | PFDN1    | intron     | 1.528  | rs7826663 rs7899 | 2 |
| AAAC.GTTT   | 2 | 148097331 | 148097351 | 5.25    | .                  | .        | intergenic | .      | rs792803139      | 2 |
| AAAAC.GTTTT | 2 | 148166564 | 148166584 | 4.2     | ENSSSCT00000015694 | .        | intron     | 0.214  | rs790078730      | 2 |
| AAAAT.ATTTT | 2 | 148183406 | 148183425 | 4       | ENSSSCT00000015694 | .        | intron     | 0.368  | rs789728703      | 2 |
| AC.GT       | 2 | 148275084 | 148275094 | 5.5     | ENSSSCT00000015698 | .        | intron     | 0.358  | rs7171441 rs7878 | 2 |
| AT.AT       | 2 | 148695005 | 148695032 | 14      | ENSSSCT00000030809 | PCDHAC2  | intron     | .      | rs7339313 rs7885 | 2 |
| ACAT.ATGT   | 2 | 148790790 | 148790805 | 4       | .                  | .        | intergenic | 0.22   | .                | 2 |
| AAAT.ATTT   | 2 | 148834243 | 148834262 | 5       | .                  | .        | intergenic | .      | rs784597 rs7921  | 2 |
| AC.GT       | 2 | 148919522 | 148919532 | 5.5     | .                  | .        | intergenic | .      | rs791860784      | 3 |
| AG.CT       | 2 | 149317620 | 149317630 | 5.5     | .                  | .        | intergenic | .      | rs789972976      | 2 |
| AGG.CCT     | 2 | 149383998 | 149384010 | 4.33333 | ENSSSCT00000015724 | DIAPH1   | intron     | .      | rs792739653      | 2 |
| AAAAG.CTTTT | 2 | 149630912 | 149630931 | 4       | .                  | .        | intergenic | 0.29   | rs788718474      | 2 |
| AGG.CCT     | 2 | 149716474 | 149716489 | 5.33333 | .                  | .        | intergenic | .      | rs790895960      | 2 |
| AAAC.GTTT   | 2 | 149769243 | 149769258 | 4       | .                  | .        | intergenic | 0.228  | rs790533865      | 2 |
| AAAT.ATTT   | 2 | 149778772 | 149778785 | 3.5     | ENSSSCT00000015732 | RNF14    | intron     | 0.105  | .                | 2 |
| AAAC.GTTT   | 2 | 149855864 | 149855880 | 4.25    | .                  | .        | intergenic | 0.027  | rs787246932      | 2 |
| AAAAT.ATTTT | 2 | 149864930 | 149864950 | 4.2     | .                  | .        | intergenic | .      | rs792540458      | 2 |
| AC.GT       | 2 | 150049738 | 150049764 | 13.5    | .                  | .        | intergenic | -0.026 | rs7309766 rs7932 | 2 |
| AC.GT       | 2 | 150105304 | 150105316 | 6.5     | .                  | .        | intergenic | 0.088  | rs787173741      | 2 |
| AAC.GTT     | 2 | 150405336 | 150405360 | 8.33333 | ENSSSCT00000028925 | FGF1     | intron     | .      | rs792715626      | 2 |
| AG.CT       | 2 | 150460739 | 150460756 | 9       | .                  | .        | intergenic | .      | rs791930500      | 2 |
| AG.CT       | 2 | 150673715 | 150673724 | 5       | ENSSSCT00000015737 | ARHGAP26 | intron     | -0.004 | .                | 2 |
| AC.GT       | 2 | 150725722 | 150725733 | 6       | ENSSSCT00000015737 | ARHGAP26 | intron     | .      | rs702976154      | 2 |
| AAAT.ATTT   | 2 | 150891780 | 150891798 | 4.75    | ENSSSCT00000015737 | ARHGAP26 | intron     | 0.049  | rs791046372      | 2 |
| AT.AT       | 2 | 151022782 | 151022806 | 12.5    | .                  | .        | intergenic | -0.132 | rs790245049      | 2 |
| AG.CT       | 2 | 151038713 | 151038725 | 6.5     | .                  | .        | intergenic | .      | rs702573682      | 4 |
| AAAG.CTTT   | 2 | 151044387 | 151044409 | 5.75    | .                  | .        | intergenic | 0.071  | rs723544 rs7863  | 2 |
| AC.GT       | 2 | 151088027 | 151088040 | 7       | ENSSSCT00000015739 | NR3C1    | intron     | -0.001 | rs788892891      | 3 |
| AATG.CATT   | 2 | 151214175 | 151214194 | 5       | .                  | .        | intergenic | 0.162  | rs788467673      | 2 |
| AC.GT       | 2 | 151368399 | 151368416 | 9       | .                  | .        | intergenic | .      | rs791554 rs7931  | 2 |
| AAAC.GTTT   | 2 | 151399182 | 151399203 | 5.5     | .                  | .        | intergenic | 0.06   | rs715995 rs7886  | 2 |
| AGC.GCT     | 2 | 151439511 | 151439524 | 4.66667 | .                  | .        | intergenic | -0.144 | .                | 2 |
| AG.CT       | 2 | 151480480 | 151480492 | 6.5     | .                  | .        | intergenic | 0.028  | rs791113093      | 2 |
| AAAAC.GTTTT | 2 | 151645911 | 151645936 | 5.2     | .                  | .        | intergenic | .      | rs792729605      | 2 |
| AG.CT       | 2 | 151855415 | 151855424 | 5       | .                  | .        | intergenic | 0.215  | rs787653918      | 2 |
| AAG.CTT     | 2 | 151987242 | 151987257 | 5.33333 | .                  | .        | intergenic | 0.11   | rs791961230      | 2 |

|             |   |           |           |         |                    |            |            |        |                |   |
|-------------|---|-----------|-----------|---------|--------------------|------------|------------|--------|----------------|---|
| AAC.GTT     | 2 | 152346649 | 152346662 | 4.66667 | .                  | .          | intergenic | .      | 371629 rs7892  | 2 |
| AAAC.GTTT   | 2 | 152383413 | 152383433 | 5.25    | .                  | .          | intergenic | 0.071  | rs790968962    | 3 |
| AAC.GTT     | 2 | 152584576 | 152584594 | 6.33333 | .                  | .          | intergenic | 0.496  | 311435 rs7920  | 2 |
| AAAC.GTTT   | 2 | 152662795 | 152662809 | 3.75    | .                  | .          | intergenic | -0.094 | rs791051157    | 2 |
| AAAC.GTTT   | 2 | 152744597 | 152744617 | 5.25    | .                  | .          | intergenic | 0.034  | rs787353989    | 3 |
| AT.AT       | 2 | 152814512 | 152814522 | 5.5     | .                  | .          | intergenic | 0.015  | rs792944941    | 3 |
| AAAC.GTTT   | 2 | 153038706 | 153038723 | 4.5     | .                  | .          | intergenic | .      | 305424 rs7887  | 2 |
| AC.GT       | 2 | 153236002 | 153236023 | 11      | .                  | .          | intergenic | -0.086 | rs787974668    | 4 |
| AAATT.AATTT | 2 | 153248215 | 153248231 | 3.4     | .                  | .          | intergenic | 0.078  | rs793143874    | 2 |
| AC.GT       | 2 | 153267049 | 153267060 | 6       | .                  | .          | intergenic | 0.208  | rs787667300    | 2 |
| AG.CT       | 2 | 153310383 | 153310401 | 9.5     | .                  | .          | intergenic | 0.189  | 317188 rs7867  | 2 |
| AG.CT       | 2 | 153465533 | 153465543 | 5.5     | .                  | .          | intergenic | .      | rs790502902    | 3 |
| AAAAC.GTTTT | 2 | 153824447 | 153824469 | 4.6     | ENSSSCT00000015749 | .          | intron     | .      | 395187 rs7870  | 2 |
| AAAAG.CTTTT | 2 | 153839670 | 153839687 | 3.6     | ENSSSCT00000015749 | .          | intron     | 0.743  | rs793731080    | 2 |
| AAAAG.CTTTT | 2 | 153839670 | 153839687 | 3.6     | ENSSSCT00000029042 | .          | intron     | 0.743  | rs793731080    | 2 |
| AAAAG.CTTTT | 2 | 153839670 | 153839687 | 3.6     | ENSSSCT00000015750 | .          | intron     | 0.743  | rs793731080    | 2 |
| AT.AT       | 2 | 153958554 | 153958564 | 5.5     | ENSSSCT00000015746 | PLAC8L1    | intron     | 0.104  | rs793321156    | 3 |
| AAT.ATT     | 2 | 154110133 | 154110154 | 7.33333 | .                  | .          | intergenic | .      | 376295 rs7877  | 2 |
| AAAC.GTTT   | 2 | 154167799 | 154167821 | 5.75    | ENSSSCT00000015753 | .          | intron     | 0.26   | 251836 rs7896  | 2 |
| AAAC.GTTT   | 2 | 154191069 | 154191092 | 6       | .                  | .          | intergenic | -0.011 | rs786911066    | 2 |
| AAAC.GTTT   | 2 | 154256435 | 154256449 | 3.75    | .                  | .          | intergenic | .      | 323982 rs7871  | 2 |
| AG.CT       | 2 | 154266253 | 154266263 | 5.5     | .                  | .          | intergenic | 0.273  | rs787124101    | 3 |
| AAAC.GTTT   | 2 | 154322690 | 154322703 | 3.5     | ENSSSCT00000015755 | TCERG1     | intron     | .      | 374530 rs7899  | 3 |
| AAAG.CTTT   | 2 | 154340833 | 154340847 | 3.75    | ENSSSCT00000015755 | TCERG1     | intron     | 0.302  | rs790086387    | 2 |
| AG.CT       | 2 | 154459482 | 154459491 | 5       | ENSSSCT00000029561 | PPP2R2B    | intron     | 0.002  | rs791124767    | 4 |
| AAC.GTT     | 2 | 154739588 | 154739600 | 4.33333 | .                  | .          | intergenic | -0.277 | 370453 rs7930  | 3 |
| AG.CT       | 2 | 154864453 | 154864464 | 6       | .                  | .          | intergenic | 0.087  | rs705091475    | 2 |
| AC.GT       | 2 | 155208697 | 155208710 | 7       | .                  | .          | intergenic | -0.12  | rs786869060    | 7 |
| AC.GT       | 2 | 155452507 | 155452521 | 7.5     | .                  | .          | intergenic | -0.012 | 322545 rs7892  | 4 |
| ACAT.ATGT   | 2 | 155472645 | 155472658 | 3.5     | .                  | .          | intergenic | 0.209  | 300342 rs7904  | 2 |
| AC.GT       | 2 | 155489766 | 155489776 | 5.5     | .                  | .          | intergenic | 0.899  | rs787801380    | 2 |
| AC.GT       | 2 | 155575316 | 155575329 | 7       | .                  | .          | intergenic | -0.023 | 332968 rs7869  | 4 |
| AC.GT       | 2 | 155588941 | 155588951 | 5.5     | .                  | .          | intergenic | .      | .              | 3 |
| AACAT.ATGTT | 2 | 155597403 | 155597434 | 6.4     | .                  | .          | intergenic | 0.262  | rs788273394    | 2 |
| AAAC.GTTT   | 2 | 155732994 | 155733008 | 3.75    | .                  | .          | intergenic | 0.116  | rs787102492    | 2 |
| AT.AT       | 2 | 156075552 | 156075561 | 5       | .                  | .          | intergenic | .      | rs788140328    | 2 |
| AC.GT       | 2 | 156105206 | 156105220 | 7.5     | .                  | .          | intergenic | .      | 316009 rs7925  | 2 |
| AG.CT       | 2 | 156531578 | 156531592 | 7.5     | ENSSSCT00000015770 | HTR4       | intron     | .      | rs791793665    | 2 |
| AAAC.GTTT   | 2 | 156628960 | 156628974 | 3.75    | .                  | .          | intergenic | .      | rs788210107    | 2 |
| AAG.CTT     | 2 | 156674485 | 156674496 | 4       | .                  | .          | intergenic | .      | rs788331031    | 2 |
| AAAC.GTTT   | 2 | 157587920 | 157587943 | 6       | .                  | .          | intergenic | -0.055 | 375922 rs7893  | 2 |
| AAAC.GTTT   | 2 | 158579464 | 158579482 | 4.75    | .                  | .          | intergenic | .      | rs787404224    | 2 |
| AGC.GCT     | 2 | 158650368 | 158650385 | 6       | .                  | .          | intergenic | -0.227 | rs791733688    | 2 |
| AT.AT       | 2 | 159104897 | 159104920 | 12      | .                  | .          | intergenic | .      | rs793826477    | 2 |
| AGAT.ATCT   | 2 | 159117674 | 159117688 | 3.75    | .                  | .          | intergenic | .      | .              | 2 |
| AG.CT       | 2 | 159126415 | 159126426 | 6       | .                  | .          | intergenic | .      | rs791231361    | 3 |
| AG.CT       | 2 | 159148556 | 159148568 | 6.5     | .                  | .          | intergenic | .      | rs792282056    | 3 |
| ATC.GAT     | 2 | 159152212 | 159152229 | 6       | .                  | .          | intergenic | .      | rs788712173    | 2 |
| AAAT.ATTT   | 2 | 159280686 | 159280704 | 4.75    | .                  | .          | intergenic | -0.313 | rs789576600    | 2 |
| AAC.GTT     | 2 | 159309955 | 159309971 | 5.66667 | .                  | .          | intergenic | -0.032 | rs790244465    | 2 |
| AT.AT       | 2 | 160211596 | 160211607 | 6       | .                  | .          | intergenic | .      | 774187 rs7933  | 4 |
| ACAT.ATGT   | 2 | 160428855 | 160428867 | 3.25    | .                  | .          | intergenic | .      | .              | 2 |
| AG.CT       | 2 | 160438561 | 160438575 | 7.5     | .                  | .          | intergenic | .      | .              | 2 |
| AC.GT       | 2 | 160654682 | 160654697 | 8       | .                  | .          | intergenic | .      | rs788953566    | 3 |
| AAG.CTT     | 2 | 160902748 | 160902789 | 14      | .                  | .          | intergenic | .      | .              | 2 |
| AT.AT       | 2 | 161194690 | 161194704 | 7.5     | .                  | .          | intergenic | .      | rs793506435    | 4 |
| AAAT.ATTT   | 2 | 161196644 | 161196670 | 6.75    | .                  | .          | intergenic | .      | rs793602640    | 2 |
| AT.AT       | 2 | 161277953 | 161277962 | 5       | .                  | .          | intergenic | .      | .              | 2 |
| AG.CT       | 2 | 161284968 | 161284983 | 8       | .                  | .          | intergenic | .      | .              | 2 |
| AAAC.GTTT   | 2 | 161319782 | 161319812 | 7.75    | .                  | .          | intergenic | .      | rs697877376    | 2 |
| AT.AT       | 2 | 161507554 | 161507563 | 5       | .                  | .          | intergenic | .      | 381225 rs7913  | 2 |
| AT.AT       | 2 | 161621828 | 161621839 | 6       | .                  | .          | intergenic | .      | rs793083876    | 2 |
| AAC.GTT     | 3 | 421468    | 421481    | 4.66667 | .                  | .          | intergenic | .      | rs792696310    | 2 |
| AC.GT       | 3 | 2070057   | 2070070   | 7       | .                  | .          | intergenic | .      | .              | 2 |
| AG.CT       | 3 | 2252647   | 2252659   | 6.5     | .                  | .          | intergenic | -0.176 | 322959 rs7903  | 2 |
| AAAG.CTTT   | 3 | 2381908   | 2381932   | 6.25    | .                  | .          | intergenic | 0.145  | rs789902690    | 2 |
| AG.CT       | 3 | 2389474   | 2389499   | 13      | .                  | .          | intergenic | .      | 363174 rs7883  | 2 |
| AAAAG.CTTTT | 3 | 3901535   | 3901552   | 3.6     | .                  | .          | intergenic | .      | .              | 2 |
| AGGG.CCCT   | 3 | 4730915   | 4730929   | 3.75    | ENSSSCT00000008324 | BETA-ACTII | intron     | 3.528  | 377865 rs7933  | 2 |
| AC.GT       | 3 | 4992914   | 4992925   | 6       | .                  | .          | intergenic | .      | rs787180760    | 3 |
| AAAC.GTTT   | 3 | 5348211   | 5348228   | 4.5     | .                  | .          | intergenic | .      | rs790199766    | 2 |
| AAAC.GTTT   | 3 | 5588626   | 5588650   | 6.25    | ENSSSCT00000008342 | BAIAP2L1   | cds        | 1.291  | .              | 2 |
| AAAC.GTTT   | 3 | 5588626   | 5588650   | 6.25    | ENSSSCT00000008342 | BAIAP2L1   | intron     | 1.291  | .              | 2 |
| AGGG.CCCT   | 3 | 5799868   | 5799892   | 6.25    | .                  | .          | intergenic | 0.503  | 327022 rs7926  | 2 |
| AAAC.GTTT   | 3 | 5936249   | 5936276   | 7       | .                  | .          | intergenic | -0.057 | 3770928 rs7907 | 3 |
| AAAT.ATTT   | 3 | 7120854   | 7120867   | 3.5     | ENSSSCT00000008382 | AZGP1      | promoter   | .      | 312620 rs7901  | 2 |
| AC.GT       | 3 | 7269250   | 7269259   | 5       | .                  | .          | intergenic | .      | .              | 2 |
| AAAAC.GTTTT | 3 | 7415010   | 7415037   | 5.6     | .                  | .          | intergenic | .      | rs787523280    | 2 |
| AAAC.GTTT   | 3 | 7556314   | 7556328   | 3.75    | .                  | .          | intergenic | .      | rs789508326    | 2 |
| AAAC.GTTT   | 3 | 7567839   | 7567855   | 4.25    | .                  | .          | intergenic | .      | rs792469810    | 2 |
| AAAG.CTTT   | 3 | 8026757   | 8026769   | 3.25    | .                  | .          | intergenic | -0.079 | rs786852086    | 3 |
| AAC.GTT     | 3 | 8108749   | 8108762   | 4.66667 | ENSSSCT00000008416 | EPHB4      | intron     | 0.028  | rs788231299    | 2 |
| AG.CT       | 3 | 9536768   | 9536780   | 6.5     | ENSSSCT00000008425 | PRKRIP1    | intron     | .      | rs793549770    | 4 |
| AAGGG.CCCT  | 3 | 9659541   | 9659563   | 4.6     | .                  | .          | intergenic | .      | rs792378961    | 2 |

|             |   |          |          |         |                    |          |            |        |               |   |
|-------------|---|----------|----------|---------|--------------------|----------|------------|--------|---------------|---|
| AAAT.ATTT   | 3 | 9664587  | 9664601  | 3.75    | ENSSSCT00000024358 | .        | promoter   | .      | J72750 rs7898 | 2 |
| AATG.CATT   | 3 | 10000883 | 10000901 | 4.75    | .                  | .        | intergenic | .      | rs786541958   | 2 |
| AAAG.CTTT   | 3 | 10141694 | 10141713 | 5       | .                  | .        | intergenic | .      | rs786767143   | 3 |
| AAT.ATT     | 3 | 10170258 | 10170273 | 5.33333 | .                  | .        | intergenic | .      | rs790090480   | 3 |
| AC.GT       | 3 | 10563415 | 10563427 | 6.5     | ENSSSCT00000008451 | BCL7B    | intron     | .      | .             | 2 |
| AT.AT       | 3 | 10639362 | 10639372 | 5.5     | .                  | .        | intergenic | .      | J17783 rs7918 | 2 |
| AAAC.GTTT   | 3 | 10660585 | 10660607 | 5.75    | ENSSSCT00000008456 | WBSCR22  | intron     | -0.101 | rs792096315   | 2 |
| AAAC.GTTT   | 3 | 10919799 | 10919817 | 4.75    | .                  | .        | intergenic | -0.305 | rs793846557   | 2 |
| AC.GT       | 3 | 10934382 | 10934408 | 13.5    | ENSSSCT00000032354 | .        | intron     | 0.335  | 367184 rs7887 | 2 |
| AC.GT       | 3 | 10934382 | 10934408 | 13.5    | ENSSSCT00000025955 | LIMK1    | promoter   | 0.335  | 367184 rs7887 | 2 |
| AAAT.ATTT   | 3 | 10972510 | 10972526 | 4.25    | .                  | .        | intergenic | .      | J17798 rs7863 | 2 |
| AAAAC.GTTTT | 3 | 11044661 | 11044677 | 3.4     | ENSSSCT00000028458 | LAT2     | intron     | .      | 399638 rs7918 | 2 |
| AAAC.GTTT   | 3 | 11411341 | 11411355 | 3.75    | .                  | .        | intergenic | .      | rs787738819   | 2 |
| AAAC.GTTT   | 3 | 11483100 | 11483117 | 4.5     | ENSSSCT00000031896 | GTF2I    | intron     | -0.146 | 190096 rs7901 | 3 |
| AAAC.GTTT   | 3 | 11483100 | 11483117 | 4.5     | ENSSSCT00000030268 | GTF2I    | intron     | -0.146 | 190096 rs7901 | 3 |
| AAAC.GTTT   | 3 | 11483100 | 11483117 | 4.5     | ENSSSCT00000008466 | GTF2I    | intron     | -0.146 | 190096 rs7901 | 3 |
| AAAAT.ATTTT | 3 | 11803008 | 11803027 | 4       | .                  | .        | intergenic | 0.094  | rs788260334   | 2 |
| AG.CT       | 3 | 11843728 | 11843739 | 6       | .                  | .        | intergenic | -0.06  | rs791683513   | 2 |
| AC.GT       | 3 | 12083600 | 12083616 | 8.5     | .                  | .        | intergenic | 0.005  | 267192 rs7933 | 2 |
| AG.CT       | 3 | 12123359 | 12123370 | 6       | .                  | .        | intergenic | .      | .             | 3 |
| AAAC.GTTT   | 3 | 12573637 | 12573655 | 4.75    | .                  | .        | intergenic | 0.282  | rs792556219   | 3 |
| AGGG.CCCT   | 3 | 13127848 | 13127862 | 3.75    | .                  | .        | intergenic | -0.097 | 131810 rs7906 | 2 |
| AAAC.GTTT   | 3 | 13428765 | 13428776 | 3       | .                  | .        | intergenic | 0.365  | rs787549328   | 2 |
| AC.GT       | 3 | 13437166 | 13437177 | 6       | .                  | .        | intergenic | -0.171 | rs788567036   | 2 |
| AC.GT       | 3 | 13489359 | 13489378 | 10      | .                  | .        | intergenic | .      | 381813 rs7907 | 3 |
| AAAT.ATTT   | 3 | 13545020 | 13545035 | 4       | .                  | .        | intergenic | .      | rs791911327   | 2 |
| AAAAT.ATTTT | 3 | 13615722 | 13615737 | 3.2     | .                  | .        | intergenic | 0.209  | rs791838821   | 2 |
| AAAAC.GTTTT | 3 | 13802802 | 13802819 | 3.6     | .                  | .        | intergenic | 0.251  | 722377 rs7901 | 2 |
| AAC.GTT     | 3 | 13846771 | 13846785 | 5       | .                  | .        | intergenic | 0.059  | 315694 rs7892 | 2 |
| AAAC.GTTT   | 3 | 14145001 | 14145019 | 4.75    | .                  | .        | intergenic | 0.256  | 396860 rs7927 | 2 |
| AC.GT       | 3 | 14274603 | 14274613 | 5.5     | .                  | .        | intergenic | -0.017 | rs786807599   | 3 |
| AAT.ATT     | 3 | 14302613 | 14302626 | 4.66667 | .                  | .        | intergenic | .      | rs713251305   | 2 |
| AAAAG.CTTTT | 3 | 14310373 | 14310399 | 5.4     | .                  | .        | intergenic | -0.216 | rs787304370   | 2 |
| AC.GT       | 3 | 14327850 | 14327879 | 15      | .                  | .        | intergenic | -0.102 | rs791399923   | 5 |
| AGAT.ATCT   | 3 | 14967463 | 14967481 | 4.75    | .                  | .        | intergenic | .      | 219854 rs7889 | 2 |
| AAT.ATT     | 3 | 15177160 | 15177180 | 7       | .                  | .        | intergenic | 0.081  | 349306 rs7915 | 2 |
| AC.GT       | 3 | 15192148 | 15192160 | 6.5     | .                  | .        | intergenic | 0.106  | rs790747702   | 8 |
| AAAT.ATTT   | 3 | 15210826 | 15210837 | 3       | .                  | .        | intergenic | 0.043  | 298011 rs7928 | 2 |
| AT.AT       | 3 | 15227122 | 15227154 | 16.5    | .                  | .        | intergenic | 0.036  | rs691205448   | 2 |
| AT.AT       | 3 | 15238314 | 15238326 | 6.5     | .                  | .        | intergenic | 0.149  | 771331 rs7882 | 2 |
| AGGG.CCCT   | 3 | 15247293 | 15247306 | 3.5     | .                  | .        | intergenic | 0.002  | 334746 rs7884 | 2 |
| AAAAG.CTTTT | 3 | 15315160 | 15315180 | 4.2     | .                  | .        | intergenic | 0.188  | rs786909290   | 2 |
| AAAC.GTTT   | 3 | 15326604 | 15326625 | 5.5     | .                  | .        | intergenic | 0.055  | rs792960491   | 2 |
| AG.CT       | 3 | 15366819 | 15366833 | 7.5     | .                  | .        | intergenic | -0.135 | rs788551964   | 3 |
| AG.CT       | 3 | 15374810 | 15374824 | 7.5     | .                  | .        | intergenic | 0.635  | rs791028179   | 2 |
| AC.GT       | 3 | 15487909 | 15487927 | 9.5     | .                  | .        | intergenic | 0.591  | rs787842560   | 3 |
| AAT.ATT     | 3 | 15851165 | 15851178 | 4.66667 | .                  | .        | intergenic | .      | 355772 rs7909 | 2 |
| AC.GT       | 3 | 15855741 | 15855754 | 7       | .                  | .        | intergenic | 0.166  | rs786235528   | 3 |
| AC.GT       | 3 | 16023423 | 16023435 | 6.5     | ENSSSCT00000008475 | .        | intron     | -0.185 | .             | 2 |
| AC.GT       | 3 | 16023901 | 16023918 | 9       | ENSSSCT00000008475 | .        | intron     | -0.026 | rs792734795   | 3 |
| AC.GT       | 3 | 16157984 | 16157993 | 5       | ENSSSCT00000008475 | .        | intron     | 0.181  | .             | 2 |
| AT.AT       | 3 | 16166135 | 16166144 | 5       | ENSSSCT00000008475 | .        | intron     | .      | rs788679775   | 2 |
| AC.GT       | 3 | 16200725 | 16200735 | 5.5     | .                  | .        | intergenic | -0.134 | .             | 2 |
| AAAAC.GTTTT | 3 | 16220706 | 16220729 | 4.8     | .                  | .        | intergenic | 0.175  | rs792100248   | 2 |
| ATCC.GGAT   | 3 | 16234161 | 16234185 | 6.25    | .                  | .        | intergenic | .      | rs790520415   | 2 |
| AC.GT       | 3 | 16344376 | 16344386 | 5.5     | ENSSSCT00000008478 | .        | intron     | -0.152 | rs786248095   | 2 |
| AG.CT       | 3 | 16626607 | 16626621 | 7.5     | ENSSSCT00000008480 | .        | intron     | -0.103 | .             | 3 |
| AATC.GATT   | 3 | 16653874 | 16653900 | 6.75    | .                  | .        | intergenic | 0.308  | 175387 rs7876 | 2 |
| AG.CT       | 3 | 16801434 | 16801446 | 6.5     | .                  | .        | intergenic | .      | .             | 2 |
| AAAC.GTTT   | 3 | 16857923 | 16857942 | 5       | .                  | .        | intergenic | .      | rs792463429   | 3 |
| AC.GT       | 3 | 16995043 | 16995053 | 5.5     | ENSSSCT00000025455 | VKORC1L1 | intron     | -0.029 | .             | 2 |
| AC.GT       | 3 | 17000390 | 17000413 | 12      | ENSSSCT00000025455 | VKORC1L1 | intron     | .      | rs790405007   | 2 |
| AAAG.CTTT   | 3 | 17008622 | 17008636 | 3.75    | ENSSSCT00000025455 | VKORC1L1 | intron     | 0.011  | rs789078869   | 2 |
| AAAT.ATTT   | 3 | 17252712 | 17252734 | 5.75    | ENSSSCT00000027523 | ZNF713   | intron     | .      | rs793329212   | 2 |
| AC.GT       | 3 | 17258013 | 17258026 | 7       | ENSSSCT00000027523 | ZNF713   | intron     | .      | .             | 3 |
| AAAC.GTTT   | 3 | 17292878 | 17292892 | 3.75    | ENSSSCT00000008498 | 14-Sep   | intron     | 1.029  | rs790027683   | 2 |
| AC.GT       | 3 | 17334831 | 17334842 | 6       | .                  | .        | intergenic | .      | rs786717932   | 2 |
| AAAC.GTTT   | 3 | 17511891 | 17511909 | 4.75    | ENSSSCT00000008507 | PRSS8    | intron     | -0.008 | rs792308175   | 2 |
| AG.CT       | 3 | 17650992 | 17651002 | 5.5     | .                  | .        | intergenic | .      | 222220 rs7865 | 2 |
| ACAG.CTGT   | 3 | 17850137 | 17850155 | 4.75    | ENSSSCT00000008519 | STX1B    | intron     | 0.209  | rs791566213   | 2 |
| AG.CT       | 3 | 17911904 | 17911918 | 7.5     | .                  | .        | intergenic | 0.04   | rs791765405   | 2 |
| AAAC.GTTT   | 3 | 18627694 | 18627725 | 8       | ENSSSCT00000028946 | KCTD13   | promoter   | 0.058  | rs793706001   | 2 |
| AAAC.GTTT   | 3 | 19029919 | 19029941 | 5.75    | ENSSSCT00000008560 | XPO6     | intron     | 0.139  | rs793264463   | 2 |
| AAAT.ATTT   | 3 | 19172558 | 19172580 | 5.75    | ENSSSCT00000026157 | GSG1L    | intron     | 0.604  | rs790301307   | 2 |
| ACGC.GCGT   | 3 | 19437258 | 19437269 | 3       | ENSSSCT00000032927 | KIAA0556 | intron     | -0.079 | rs790825949   | 2 |
| ACGC.GCGT   | 3 | 19437258 | 19437269 | 3       | ENSSSCT00000008563 | KIAA0556 | intron     | -0.079 | rs790825949   | 2 |
| ACGC.GCGT   | 3 | 19437258 | 19437269 | 3       | ENSSSCT00000034865 | KIAA0556 | intron     | -0.079 | rs790825949   | 2 |
| ACGC.GCGT   | 3 | 19437258 | 19437269 | 3       | ENSSSCT00000036362 | KIAA0556 | intron     | -0.079 | rs790825949   | 2 |
| AC.GT       | 3 | 19675246 | 19675260 | 7.5     | .                  | .        | intergenic | -0.445 | .             | 2 |
| AG.CT       | 3 | 20005785 | 20005801 | 8.5     | .                  | .        | intergenic | 0.22   | rs792289629   | 2 |
| AAAG.CTTT   | 3 | 20404346 | 20404376 | 7.75    | .                  | .        | intergenic | .      | .             | 2 |
| AG.CT       | 3 | 20441038 | 20441051 | 7       | .                  | .        | intergenic | -0.107 | rs791525193   | 2 |
| AT.AT       | 3 | 20681897 | 20681908 | 6       | .                  | .        | intergenic | .      | .             | 2 |
| AC.GT       | 3 | 20684382 | 20684396 | 7.5     | .                  | .        | intergenic | -0.434 | rs711639571   | 2 |

|             |   |          |          |         |                    |          |            |        |               |   |
|-------------|---|----------|----------|---------|--------------------|----------|------------|--------|---------------|---|
| AG.CT       | 3 | 20885265 | 20885280 | 8       | .                  | .        | intergenic | 0.853  | .             | 2 |
| AC.GT       | 3 | 21299709 | 21299720 | 6       | .                  | .        | intergenic | -0.065 | rs789187820   | 2 |
| AAAAG.CTTTT | 3 | 21429644 | 21429663 | 4       | .                  | .        | intergenic | .      | 350629 rs7862 | 2 |
| AC.GT       | 3 | 21471162 | 21471178 | 8.5     | .                  | .        | intergenic | 0.045  | 332552 rs7922 | 3 |
| AGAT.ATCT   | 3 | 21476940 | 21476957 | 4.5     | .                  | .        | intergenic | -0.249 | 384429 rs7932 | 2 |
| AC.GT       | 3 | 21705823 | 21705837 | 7.5     | .                  | .        | intergenic | 0.012  | 354309 rs7896 | 4 |
| AT.AT       | 3 | 22853768 | 22853779 | 6       | ENSSSCT00000008581 | CACNG3   | intron     | .      | rs789162769   | 2 |
| ATCC.GGAT   | 3 | 23720360 | 23720397 | 9.5     | ENSSSCT00000008587 | HS3ST2   | intron     | 0.084  | rs789846499   | 2 |
| AAAAC.GTTTT | 3 | 23800485 | 23800501 | 3.4     | ENSSSCT00000008587 | HS3ST2   | intron     | 0.153  | rs788131476   | 2 |
| AAG.CTT     | 3 | 23873231 | 23873247 | 5.66667 | .                  | .        | intergenic | -0.149 | 167760 rs7922 | 2 |
| AG.CT       | 3 | 23881449 | 23881459 | 5.5     | .                  | .        | intergenic | .      | 364613 rs7934 | 3 |
| AAAAC.GTTTT | 3 | 24150513 | 24150534 | 3.66667 | ENSSSCT00000030167 | METTL9   | intron     | 0.353  | rs790661451   | 2 |
| AATG.CATT   | 3 | 24198505 | 24198533 | 7.25    | .                  | .        | intergenic | -0.07  | .             | 2 |
| AG.CT       | 3 | 24289209 | 24289223 | 7.5     | ENSSSCT00000008589 | EEF2K    | 3'utr      | 0.004  | rs787948656   | 2 |
| AAAC.GTTT   | 3 | 24520932 | 24520946 | 3.75    | .                  | .        | intergenic | 0.416  | 270773 rs7929 | 2 |
| AG.CT       | 3 | 24719016 | 24719032 | 8.5     | ENSSSCT00000008595 | .        | intron     | 0.083  | 225340 rs7884 | 2 |
| ACTC.GAGT   | 3 | 25154164 | 25154182 | 4.75    | ENSSSCT00000008597 | .        | intron     | .      | rs787839936   | 2 |
| AAC.GTT     | 3 | 25350401 | 25350413 | 4.33333 | ENSSSCT00000008598 | .        | intron     | .      | 751127 rs7863 | 2 |
| AC.GT       | 3 | 25479381 | 25479394 | 7       | ENSSSCT00000008598 | .        | intron     | .      | rs791544974   | 2 |
| AC.GT       | 3 | 25689287 | 25689300 | 7       | .                  | .        | intergenic | .      | .             | 3 |
| AAAAT.ATTTT | 3 | 25745686 | 25745703 | 3.6     | .                  | .        | intergenic | 0.384  | rs792133166   | 2 |
| AT.AT       | 3 | 25749741 | 25749769 | 14.5    | .                  | .        | intergenic | 0.089  | rs793766056   | 2 |
| AAAT.ATTT   | 3 | 26072642 | 26072672 | 7.75    | ENSSSCT00000024527 | THUMPD1  | intron     | 0.098  | rs791150587   | 2 |
| AAG.CTT     | 3 | 26081905 | 26081917 | 4.33333 | ENSSSCT00000027442 | ACSM4    | intron     | -0.028 | rs793186876   | 2 |
| AAC.GTT     | 3 | 26133293 | 26133309 | 5.66667 | .                  | .        | intergenic | 0.008  | rs791972632   | 2 |
| AAC.GTT     | 3 | 26299352 | 26299370 | 6.33333 | .                  | .        | intergenic | .      | 151860 rs7866 | 3 |
| AAAG.CTTT   | 3 | 26522382 | 26522400 | 4.75    | .                  | .        | intergenic | -0.042 | 372452 rs7888 | 2 |
| AAAC.GTTT   | 3 | 26760369 | 26760387 | 4.75    | .                  | .        | intergenic | .      | 307133 rs7916 | 2 |
| AAAT.ATTT   | 3 | 26761175 | 26761193 | 4.75    | .                  | .        | intergenic | .      | .             | 2 |
| AT.AT       | 3 | 26794927 | 26794936 | 5       | .                  | .        | intergenic | 0.07   | rs789435071   | 2 |
| AAC.GTT     | 3 | 27072563 | 27072575 | 4.33333 | ENSSSCT00000020027 | U6       | promoter   | .      | 355487 rs7926 | 2 |
| AT.AT       | 3 | 27210055 | 27210064 | 5       | ENSSSCT00000031474 | .        | intron     | -0.174 | rs790200791   | 2 |
| AAAC.GTTT   | 3 | 27286736 | 27286761 | 6.5     | .                  | .        | intergenic | 0.158  | rs792723982   | 2 |
| AAAAT.ATTTT | 3 | 27325161 | 27325183 | 4.6     | .                  | .        | intergenic | .      | rs790342853   | 2 |
| AAC.GTT     | 3 | 27334977 | 27334990 | 4.66667 | .                  | .        | intergenic | .      | rs787408074   | 2 |
| AC.GT       | 3 | 27449948 | 27449961 | 7       | .                  | .        | intergenic | -0.074 | .             | 2 |
| AAAC.GTTT   | 3 | 27573131 | 27573157 | 6.75    | .                  | .        | intergenic | .      | rs787659662   | 2 |
| AAAT.ATTT   | 3 | 27769523 | 27769549 | 6.75    | ENSSSCT00000008627 | .        | intron     | -0.365 | 284007 rs7933 | 2 |
| AAAC.GTTT   | 3 | 27946124 | 27946147 | 6       | .                  | .        | intergenic | 0.674  | 338130 rs7929 | 2 |
| AG.CT       | 3 | 28179473 | 28179502 | 15      | .                  | .        | intergenic | -0.095 | 312233 rs7878 | 4 |
| AC.GT       | 3 | 28228085 | 28228095 | 5.5     | .                  | .        | intergenic | .      | rs790570479   | 2 |
| AG.CT       | 3 | 28404420 | 28404432 | 6.5     | .                  | .        | intergenic | -0.145 | 206218 rs7907 | 2 |
| AGG.CCT     | 3 | 28441500 | 28441514 | 5       | .                  | .        | intergenic | -0.094 | rs787824609   | 2 |
| AAGG.CCTT   | 3 | 28450891 | 28450940 | 12.5    | .                  | .        | intergenic | .      | rs788078843   | 2 |
| AT.AT       | 3 | 28577166 | 28577178 | 6.5     | .                  | .        | intergenic | 0.098  | rs787879683   | 2 |
| AC.GT       | 3 | 28934139 | 28934164 | 13      | .                  | .        | intergenic | .      | rs789737939   | 3 |
| AAAC.GTTT   | 3 | 28938708 | 28938729 | 5.5     | .                  | .        | intergenic | -0.983 | 334358 rs7916 | 2 |
| AC.GT       | 3 | 29037345 | 29037359 | 7.5     | ENSSSCT00000008628 | .        | intron     | .      | rs790442665   | 2 |
| AAAC.GTTT   | 3 | 29178366 | 29178390 | 6.25    | .                  | .        | intergenic | .      | 198267 rs7913 | 2 |
| AAAC.GTTT   | 3 | 29179281 | 29179299 | 4.75    | .                  | .        | intergenic | .      | 106248 rs7877 | 2 |
| AG.CT       | 3 | 29290568 | 29290581 | 7       | .                  | .        | intergenic | 0.13   | rs787818520   | 3 |
| AC.GT       | 3 | 29366014 | 29366035 | 11      | .                  | .        | intergenic | .      | .             | 2 |
| AC.GT       | 3 | 29514832 | 29514843 | 6       | ENSSSCT00000028273 | CPPED1   | intron     | -0.345 | .             | 2 |
| AG.CT       | 3 | 29638967 | 29638979 | 6.5     | ENSSSCT00000008633 | PARN     | intron     | -0.071 | rs787390643   | 2 |
| AAAC.GTTT   | 3 | 30094814 | 30094829 | 4       | ENSSSCT00000027014 | .        | intron     | -0.009 | rs788019543   | 2 |
| AT.AT       | 3 | 30140590 | 30140600 | 5.5     | ENSSSCT00000027014 | .        | intron     | 0.098  | rs791475370   | 2 |
| AAAAC.GTTTT | 3 | 30386599 | 30386622 | 4.8     | .                  | .        | intergenic | .      | rs790239337   | 2 |
| AAT.ATT     | 3 | 30670742 | 30670762 | 7       | .                  | .        | intergenic | -0.03  | rs791856306   | 2 |
| AACC.GGTT   | 3 | 30771432 | 30771455 | 6       | .                  | .        | intergenic | -0.141 | rs793059327   | 2 |
| AC.GT       | 3 | 30805483 | 30805502 | 10      | .                  | .        | intergenic | -0.004 | .             | 2 |
| ATCC.GGAT   | 3 | 30807557 | 30807574 | 4.5     | .                  | .        | intergenic | .      | 369000 rs7899 | 2 |
| AAAC.GTTT   | 3 | 30814789 | 30814809 | 5.25    | .                  | .        | intergenic | 0.045  | 335118 rs7862 | 2 |
| AGG.CCT     | 3 | 31076364 | 31076378 | 5       | .                  | .        | intergenic | 0.015  | 167215 rs7930 | 2 |
| AG.CT       | 3 | 31189647 | 31189659 | 6.5     | .                  | .        | intergenic | -0.098 | .             | 3 |
| AAAAG.CTTTT | 3 | 31313871 | 31313894 | 4       | .                  | .        | intergenic | 0.06   | rs787631771   | 2 |
| AAACC.GGTTT | 3 | 31336903 | 31336929 | 5.4     | .                  | .        | intergenic | 0.044  | 340136 rs7891 | 2 |
| AC.GT       | 3 | 32032502 | 32032511 | 5       | .                  | .        | intergenic | 0.266  | rs791211044   | 4 |
| AC.GT       | 3 | 32403270 | 32403290 | 10.5    | .                  | .        | intergenic | .      | .             | 2 |
| AC.GT       | 3 | 32524095 | 32524105 | 5.5     | ENSSSCT00000008655 | .        | intron     | .      | rs787640796   | 2 |
| AAAT.ATTT   | 3 | 32581781 | 32581803 | 5.75    | .                  | .        | intergenic | .      | 341057 rs7917 | 2 |
| AAAG.CTTT   | 3 | 32968036 | 32968051 | 4       | .                  | .        | intergenic | 0.027  | rs787680043   | 2 |
| AGC.GCT     | 3 | 33183314 | 33183326 | 4.33333 | ENSSSCT00000008661 | .        | intron     | -0.025 | rs790736425   | 2 |
| AAAC.GTTT   | 3 | 33220407 | 33220430 | 6       | .                  | .        | intergenic | .      | 320660 rs7935 | 2 |
| AG.CT       | 3 | 33269693 | 33269707 | 7.5     | .                  | .        | intergenic | -0.243 | .             | 3 |
| AAAAC.GTTTT | 3 | 33351631 | 33351652 | 4.4     | ENSSSCT00000032425 | ATF7IP2  | intron     | 0.174  | rs790991063   | 2 |
| ACTC.GAGT   | 3 | 33611925 | 33611938 | 3.5     | .                  | .        | intergenic | -0.187 | .             | 2 |
| AAAG.CCTTT  | 3 | 33775902 | 33775922 | 4.2     | ENSSSCT00000008663 | GRIN2A   | intron     | -0.051 | rs790099937   | 2 |
| AG.CT       | 3 | 33880947 | 33880959 | 6.5     | .                  | .        | intergenic | -0.025 | rs790923279   | 2 |
| AAAAT.ATTTT | 3 | 34438321 | 34438336 | 3.2     | ENSSSCT00000029316 | C16orf72 | intron     | .      | .             | 2 |
| AG.CT       | 3 | 34653544 | 34653562 | 9.5     | ENSSSCT00000008668 | ABAT     | intron     | 0.035  | rs788823649   | 2 |
| AAAC.GTTT   | 3 | 34886000 | 34886018 | 4.75    | .                  | .        | intergenic | .      | rs790255667   | 2 |
| ACAG.CTGT   | 3 | 34894962 | 34894981 | 5       | .                  | .        | intergenic | 0.089  | rs791418228   | 2 |
| AC.GT       | 3 | 34991972 | 34991985 | 7       | .                  | .        | intergenic | .      | 358010 rs7892 | 4 |
| AACC.GGTT   | 3 | 35206388 | 35206410 | 5.75    | .                  | .        | intergenic | 0.26   | rs793015582   | 2 |



|             |   |          |          |         |                     |              |            |        |                 |   |
|-------------|---|----------|----------|---------|---------------------|--------------|------------|--------|-----------------|---|
| AAAAC.GTTTT | 3 | 35229566 | 35229588 | 4.6     | .                   | .            | intergenic | 0.062  | rs786707448     | 2 |
| AAAAC.GTTTT | 3 | 35415965 | 35415990 | 5.2     | .                   | .            | intergenic | 0.116  | rs789634035     | 2 |
| AAAAT.ATTTT | 3 | 35657350 | 35657370 | 4.2     | .                   | .            | intergenic | 0.03   | rs738337 rs7924 | 2 |
| AAC.GTT     | 3 | 35861948 | 35861964 | 5.66667 | .                   | .            | intergenic | .      | rs300461 rs7881 | 2 |
| AAAAG.CTTTT | 3 | 35976741 | 35976764 | 4.8     | .                   | .            | intergenic | -0.195 | rs792163064     | 2 |
| AAC.GTT     | 3 | 36010165 | 36010181 | 5.66667 | ENSSSCT00000008677  | RBFOX1       | intron     | 0.334  | rs790134000     | 2 |
| AAT.ATT     | 3 | 36018170 | 36018185 | 5.33333 | ENSSSCT00000008677  | RBFOX1       | intron     | 0.115  | rs791617795     | 2 |
| AAAAT.ATTTT | 3 | 36305892 | 36305913 | 4.4     | .                   | .            | intergenic | -0.187 | rs698640738     | 2 |
| AAG.CCTT    | 3 | 36308918 | 36308941 | 6       | .                   | .            | intergenic | -0.171 | rs792092927     | 3 |
| AAAC.GTTT   | 3 | 36313848 | 36313862 | 3.75    | .                   | .            | intergenic | -0.196 | rs789018803     | 3 |
| ATC.GAT     | 3 | 36344317 | 36344348 | 10.6667 | .                   | .            | intergenic | 0.02   | rs707885805     | 2 |
| AG.CT       | 3 | 36413067 | 36413076 | 5       | .                   | .            | intergenic | 0.261  | .               | 2 |
| AAT.ATT     | 3 | 36418357 | 36418371 | 5       | .                   | .            | intergenic | -0.245 | .               | 3 |
| AAAC.GTTT   | 3 | 36453247 | 36453273 | 6.75    | .                   | .            | intergenic | 0.077  | rs789134916     | 2 |
| AC.GT       | 3 | 36518940 | 36518951 | 6       | .                   | .            | intergenic | -0.051 | rs790434773     | 3 |
| AC.GT       | 3 | 36584149 | 36584183 | 17.5    | .                   | .            | intergenic | -0.48  | rs787805291     | 4 |
| AC.GT       | 3 | 36629444 | 36629456 | 6.5     | .                   | .            | intergenic | .      | rs227677 rs7933 | 2 |
| AT.AT       | 3 | 36901880 | 36901894 | 7.5     | .                   | .            | intergenic | -0.265 | .               | 2 |
| AAG.CTT     | 3 | 37064554 | 37064573 | 6.66667 | .                   | .            | intergenic | -0.692 | rs792070993     | 3 |
| AC.GT       | 3 | 37101013 | 37101029 | 8.5     | .                   | .            | intergenic | 0.102  | rs788336016     | 2 |
| ACATC.GATGT | 3 | 37111945 | 37111962 | 3.6     | .                   | .            | intergenic | -0.02  | rs793607077     | 2 |
| AC.GT       | 3 | 37221424 | 37221446 | 11.5    | .                   | .            | intergenic | -0.275 | .               | 4 |
| AAAAG.CTTTT | 3 | 37314258 | 37314275 | 3       | .                   | .            | intergenic | 0.115  | rs744785 rs7892 | 2 |
| AC.GT       | 3 | 37508089 | 37508100 | 6       | .                   | .            | intergenic | -0.736 | .               | 3 |
| AG.CT       | 3 | 37680015 | 37680037 | 11.5    | .                   | .            | intergenic | 0.118  | rs787100346     | 4 |
| AT.AT       | 3 | 37695929 | 37695938 | 5       | .                   | .            | intergenic | .      | rs793716337     | 2 |
| AAC.GTT     | 3 | 38269718 | 38269731 | 4.66667 | .                   | .            | intergenic | -0.287 | rs788255600     | 2 |
| AGGG.CCCT   | 3 | 39273108 | 39273120 | 3.25    | .                   | .            | intergenic | 0.03   | .               | 2 |
| AC.GT       | 3 | 39567975 | 39567987 | 6.5     | ENSSSCT00000008714  | CREBBP       | intron     | .      | .               | 4 |
| AC.GT       | 3 | 39567975 | 39567987 | 6.5     | ENSSSCT000000034723 | CREBBP       | intron     | .      | .               | 4 |
| AAAT.ATTT   | 3 | 40978406 | 40978422 | 4.25    | ENSSSCT00000008742  | LUC7L        | intron     | .      | rs789534264     | 2 |
| AATT.AATT   | 3 | 41139093 | 41139118 | 6.5     | .                   | .            | intergenic | .      | rs790643325     | 2 |
| AAAC.GTTT   | 3 | 41831579 | 41831595 | 4.25    | ENSSSCT00000008789  | IFT140       | intron     | .      | rs792505824     | 2 |
| AT.AT       | 3 | 43124368 | 43124386 | 9.5     | .                   | .            | intergenic | .      | .               | 3 |
| AC.GT       | 3 | 43263445 | 43263457 | 6.5     | ENSSSCT00000008843  | CENPP        | intron     | 0.879  | .               | 3 |
| AC.GT       | 3 | 43364100 | 43364113 | 7       | ENSSSCT00000008843  | CENPP        | intron     | 0.175  | .               | 2 |
| AC.GT       | 3 | 43364100 | 43364113 | 7       | ENSSSCT00000008845  | ASPN         | intron     | 0.175  | .               | 2 |
| AC.GT       | 3 | 43398485 | 43398494 | 5       | ENSSSCT00000008843  | CENPP        | intron     | 0.031  | .               | 2 |
| AC.GT       | 3 | 43398485 | 43398494 | 5       | ENSSSCT000000032452 | ECM2         | intron     | 0.031  | .               | 2 |
| AC.GT       | 3 | 44380830 | 44380840 | 5.5     | .                   | .            | intergenic | .      | rs793551974     | 2 |
| AG.CT       | 3 | 44619480 | 44619495 | 8       | .                   | .            | intergenic | -0.095 | rs792135547     | 2 |
| AAAAC.GTTTT | 3 | 44776485 | 44776523 | 7.8     | .                   | .            | intergenic | .      | rs790332319     | 2 |
| AAAT.ATTT   | 3 | 44862459 | 44862480 | 5.5     | ENSSSCT00000019914  | ssc-let-7a-2 | promoter   | -0.037 | rs789989135     | 2 |
| AAG.CTT     | 3 | 45054399 | 45054410 | 4       | .                   | .            | intergenic | .      | rs793647955     | 2 |
| AAAC.GTTT   | 3 | 45200304 | 45200335 | 8       | .                   | .            | intergenic | .      | rs789256224     | 2 |
| AAG.CTT     | 3 | 45376215 | 45376264 | 16.6667 | .                   | .            | intergenic | .      | .               | 3 |
| AAAG.CTTT   | 3 | 45719859 | 45719885 | 6.75    | .                   | .            | intergenic | 0.254  | rs378292 rs7914 | 2 |
| AAAAC.GTTTT | 3 | 45772649 | 45772684 | 6       | ENSSSCT00000008872  | ZC3H8        | intron     | .      | rs788036463     | 2 |
| AG.CT       | 3 | 45776894 | 45776904 | 5.5     | ENSSSCT00000008872  | ZC3H8        | intron     | 0.401  | rs788013580     | 2 |
| AC.GT       | 3 | 46227628 | 46227641 | 7       | ENSSSCT00000008877  | .            | intron     | .      | rs775253 rs7908 | 3 |
| AAAC.GTTT   | 3 | 46317255 | 46317273 | 4.75    | ENSSSCT00000008877  | .            | intron     | 0.669  | rs787334354     | 2 |
| AAAC.GTTT   | 3 | 46317255 | 46317273 | 4.75    | ENSSSCT00000008879  | .            | intron     | 0.669  | rs787334354     | 2 |
| ACC.GGT     | 3 | 46343203 | 46343221 | 6.33333 | ENSSSCT00000008877  | .            | intron     | .      | rs786881947     | 2 |
| CACCC.GGGTG | 3 | 46343356 | 46343379 | 4       | ENSSSCT00000008877  | .            | intron     | .      | rs788904938     | 2 |
| AT.AT       | 3 | 46454856 | 46454869 | 7       | .                   | .            | intergenic | -0.092 | rs789471132     | 2 |
| AAAAG.CTTTT | 3 | 46466184 | 46466208 | 4.16667 | .                   | .            | intergenic | -0.097 | rs790782182     | 2 |
| AGG.CCT     | 3 | 46543670 | 46543684 | 5       | .                   | .            | intergenic | .      | .               | 2 |
| AAG.CTT     | 3 | 46736828 | 46736840 | 4.33333 | .                   | .            | intergenic | -0.271 | rs788354279     | 2 |
| AAC.GTT     | 3 | 47137836 | 47137854 | 6.33333 | ENSSSCT00000029914  | .            | intron     | 0.15   | rs789818528     | 2 |
| AAAAC.GTTTT | 3 | 47244252 | 47244273 | 3.66667 | ENSSSCT00000023794  | .            | intron     | .      | rs786403932     | 2 |
| AC.GT       | 3 | 47330896 | 47330908 | 6.5     | ENSSSCT00000008884  | .            | intron     | 0.09   | .               | 4 |
| ATCC.GGAT   | 3 | 47544227 | 47544250 | 6       | .                   | .            | intergenic | 0.065  | rs790772041     | 2 |
| AAAT.ATTT   | 3 | 47753442 | 47753473 | 8       | .                   | .            | intergenic | .      | rs362933 rs7872 | 2 |
| AC.GT       | 3 | 47839040 | 47839051 | 6       | .                   | .            | intergenic | .      | rs382401 rs7912 | 2 |
| AAAC.GTTT   | 3 | 47921676 | 47921695 | 5       | .                   | .            | intergenic | .      | rs355803 rs7908 | 2 |
| AAAAC.GTTTT | 3 | 48322355 | 48322384 | 6       | .                   | .            | intergenic | -0.174 | rs149725 rs7893 | 2 |
| AC.GT       | 3 | 48427019 | 48427031 | 6.5     | ENSSSCT00000008895  | KCNIP3       | intron     | 0.149  | rs787682158     | 3 |
| AG.CT       | 3 | 48483892 | 48483901 | 5       | ENSSSCT00000008896  | .            | intron     | -0.226 | rs791175603     | 2 |
| AC.GT       | 3 | 49002914 | 49002932 | 9.5     | ENSSSCT00000008901  | .            | intron     | -0.211 | rs187355 rs7918 | 2 |
| AAAAT.ATTTT | 3 | 49079112 | 49079132 | 3.5     | ENSSSCT00000008901  | .            | intron     | .      | rs787794978     | 2 |
| AT.AT       | 3 | 49137966 | 49137978 | 6.5     | ENSSSCT00000008909  | STARD7       | intron     | 0.282  | rs302349 rs7891 | 2 |
| AT.AT       | 3 | 49291910 | 49291921 | 6       | .                   | .            | intergenic | .      | .               | 5 |
| AC.GT       | 3 | 49323756 | 49323773 | 9       | .                   | .            | intergenic | .      | rs788761719     | 2 |
| AG.CT       | 3 | 49554941 | 49554952 | 6       | .                   | .            | intergenic | .      | rs789609597     | 2 |
| AAAT.ATTT   | 3 | 49637014 | 49637026 | 3.25    | ENSSSCT00000008912  | CCDC138      | intron     | .      | rs790812391     | 2 |
| AC.GT       | 3 | 49658190 | 49658216 | 13.5    | ENSSSCT00000008912  | CCDC138      | intron     | .      | rs790603422     | 3 |
| AAAC.GTTT   | 3 | 49766228 | 49766246 | 4.75    | .                   | .            | intergenic | .      | .               | 2 |
| AAAAC.GTTTT | 3 | 49894382 | 49894408 | 5.4     | ENSSSCT00000008915  | GCC2         | intron     | 0.558  | rs321655 rs7901 | 3 |
| ACAT.ATGT   | 3 | 50304543 | 50304565 | 5.75    | .                   | .            | intergenic | 0.038  | rs787681339     | 2 |
| AAAG.CTTT   | 3 | 50367811 | 50367828 | 4.5     | .                   | .            | intergenic | -0.426 | rs793437954     | 2 |
| AG.CT       | 3 | 50400716 | 50400731 | 8       | .                   | .            | intergenic | 0.199  | rs786359354     | 2 |
| AG.CT       | 3 | 50624389 | 50624406 | 9       | .                   | .            | intergenic | 0.068  | rs787087650     | 2 |
| ACAT.ATGT   | 3 | 50861754 | 50861765 | 3       | .                   | .            | intergenic | 0.183  | rs791489285     | 2 |
| ACAT.ATGT   | 3 | 50967932 | 50967949 | 4.5     | .                   | .            | intergenic | .      | rs791331351     | 2 |

|             |   |          |          |         |                    |         |            |        |                 |   |
|-------------|---|----------|----------|---------|--------------------|---------|------------|--------|-----------------|---|
| AC.GT       | 3 | 51157921 | 51157932 | 6       | .                  | .       | intergenic | .      | rs18597 rs7883  | 3 |
| AT.AT       | 3 | 51289471 | 51289482 | 6       | .                  | .       | intergenic | -0.04  | rs792759189     | 2 |
| AAAG.CTTT   | 3 | 51308956 | 51308975 | 5       | .                  | .       | intergenic | -0.473 | rs789508718     | 2 |
| AAG.CTT     | 3 | 51365551 | 51365562 | 4       | .                  | .       | intergenic | .      | rs793497040     | 2 |
| AAAAG.CTTTT | 3 | 51417486 | 51417508 | 4.6     | .                  | .       | intergenic | -0.026 | rs791219867     | 2 |
| AC.GT       | 3 | 51616839 | 51616849 | 5.5     | ENSSSCT0000008924  | FHL2    | intron     | .      | rs792211351     | 2 |
| AAAC.GTTT   | 3 | 51778026 | 51778042 | 4.25    | .                  | .       | intergenic | 0.096  | rs790676461     | 2 |
| AAT.ATT     | 3 | 52606556 | 52606567 | 4       | .                  | .       | intergenic | .      | .               | 2 |
| AT.AT       | 3 | 52677256 | 52677272 | 8.5     | .                  | .       | intergenic | .      | rs786972748     | 2 |
| AT.AT       | 3 | 52695888 | 52695900 | 6.5     | .                  | .       | intergenic | -0.243 | .               | 2 |
| AAAC.GTTT   | 3 | 52854901 | 52854919 | 4.75    | .                  | .       | intergenic | 0.055  | rs793032999     | 2 |
| AAC.GTT     | 3 | 52875396 | 52875413 | 6       | .                  | .       | intergenic | .      | rs790457937     | 2 |
| AG.CT       | 3 | 52907797 | 52907809 | 6.5     | .                  | .       | intergenic | -0.09  | .               | 3 |
| AT.AT       | 3 | 52951117 | 52951135 | 9.5     | .                  | .       | intergenic | 0.057  | rs792120594     | 2 |
| AG.CT       | 3 | 53137205 | 53137217 | 6.5     | .                  | .       | intergenic | -0.033 | .               | 3 |
| AAAAC.GTTTT | 3 | 53182752 | 53182776 | 5       | .                  | .       | intergenic | -0.067 | rs788260723     | 2 |
| AC.GT       | 3 | 53367359 | 53367370 | 6       | .                  | .       | intergenic | -0.081 | rs790354451     | 4 |
| AAAC.GTTT   | 3 | 53373699 | 53373722 | 6       | .                  | .       | intergenic | 0.123  | rs79091 rs7927  | 2 |
| AAC.GTT     | 3 | 53494785 | 53494797 | 4.33333 | .                  | .       | intergenic | 0.357  | rs134074 rs7881 | 2 |
| AG.CT       | 3 | 53728655 | 53728679 | 12.5    | .                  | .       | intergenic | -0.168 | rs788381517     | 2 |
| AAAC.GTTT   | 3 | 53904980 | 53905002 | 5.75    | ENSSSCT0000008927  | TMEM182 | intron     | .      | rs788979679     | 2 |
| AAC.GTT     | 3 | 53944724 | 53944737 | 4.66667 | ENSSSCT0000008928  | MFSD9   | intron     | -0.084 | rs789383230     | 2 |
| AAT.ATT     | 3 | 53955352 | 53955372 | 7       | .                  | .       | intergenic | .      | .               | 2 |
| AAAC.GTTT   | 3 | 54001602 | 54001620 | 4.75    | ENSSSCT0000008930  | NHE-2   | intron     | 0.073  | rs788645005     | 2 |
| AC.GT       | 3 | 54255721 | 54255743 | 11.5    | ENSSSCT0000008934  | IL18RAP | intron     | -0.365 | rs692554221     | 2 |
| AC.GT       | 3 | 54255721 | 54255743 | 11.5    | ENSSSCT00000034710 | IL18RAP | intron     | -0.365 | rs692554221     | 2 |
| AC.GT       | 3 | 54255721 | 54255743 | 11.5    | ENSSSCT00000034786 | IL18RAP | intron     | -0.365 | rs692554221     | 2 |
| AG.CT       | 3 | 54276543 | 54276553 | 5.5     | .                  | .       | intergenic | 0.106  | .               | 2 |
| AG.CT       | 3 | 54448366 | 54448375 | 5       | ENSSSCT0000008936  | IL1RL1  | intron     | .      | rs786523167     | 2 |
| AC.GT       | 3 | 54627913 | 54627936 | 12      | .                  | .       | intergenic | .      | rs787754077     | 2 |
| AAAC.GTTT   | 3 | 54676165 | 54676182 | 4.5     | .                  | .       | intergenic | .      | rs341931 rs7933 | 2 |
| AC.GT       | 3 | 54684357 | 54684368 | 6       | .                  | .       | intergenic | .      | .               | 3 |
| AG.CT       | 3 | 54781714 | 54781725 | 6       | .                  | .       | intergenic | -0.259 | rs16343 rs7870  | 2 |
| AAGG.CCTT   | 3 | 54790454 | 54790465 | 3       | .                  | .       | intergenic | -0.069 | .               | 2 |
| AAAAG.CTTTT | 3 | 54797534 | 54797552 | 3.8     | .                  | .       | intergenic | .      | rs377792 rs7886 | 2 |
| AAAAC.GTTTT | 3 | 54838716 | 54838741 | 4.33333 | .                  | .       | intergenic | 0.111  | rs309547 rs7911 | 2 |
| AAAC.GTTT   | 3 | 54890500 | 54890511 | 3       | .                  | .       | intergenic | .      | .               | 2 |
| AAC.GTT     | 3 | 54972216 | 54972235 | 6.66667 | .                  | .       | intergenic | -0.021 | rs354675 rs7923 | 2 |
| AC.GT       | 3 | 55396430 | 55396446 | 8.5     | ENSSSCT0000008942  | RFX8    | intron     | .      | rs786278722     | 5 |
| AG.CT       | 3 | 55672673 | 55672687 | 7.5     | .                  | .       | intergenic | 0.208  | rs793790178     | 2 |
| AC.GT       | 3 | 55759184 | 55759206 | 11.5    | ENSSSCT0000008947  | RPL31   | intron     | .      | rs300325 rs7887 | 5 |
| ACAT.ATGT   | 3 | 55871369 | 55871393 | 6.25    | ENSSSCT0000008948  | .       | intron     | -0.258 | rs786951017     | 3 |
| AGG.CCT     | 3 | 56007554 | 56007565 | 4       | ENSSSCT0000008948  | .       | intron     | 0.181  | .               | 2 |
| AC.GT       | 3 | 56312439 | 56312451 | 6.5     | .                  | .       | intergenic | .      | rs697944266     | 4 |
| AC.GT       | 3 | 56323814 | 56323828 | 7.5     | .                  | .       | intergenic | 0.11   | rs349971 rs7931 | 3 |
| AAAAG.CTTTT | 3 | 56446123 | 56446142 | 3.33333 | .                  | .       | intergenic | .      | .               | 3 |
| AC.GT       | 3 | 56684223 | 56684233 | 5.5     | .                  | .       | intergenic | -0.104 | .               | 3 |
| AT.AT       | 3 | 56782197 | 56782206 | 5       | ENSSSCT0000008955  | .       | intron     | -0.592 | .               | 3 |
| AGG.CCT     | 3 | 56850868 | 56850883 | 5.33333 | ENSSSCT0000008955  | .       | intron     | 0.075  | rs320037 rs7900 | 2 |
| AT.AT       | 3 | 56939026 | 56939036 | 5.5     | ENSSSCT0000008955  | .       | intron     | 0.435  | rs394984 rs7897 | 2 |
| ATC.GAT     | 3 | 56966119 | 56966140 | 7.33333 | ENSSSCT0000008955  | .       | intron     | 0.061  | rs786283077     | 2 |
| AAAC.GTTT   | 3 | 56966421 | 56966461 | 10.25   | ENSSSCT0000008955  | .       | intron     | 0.331  | rs791188348     | 3 |
| AATG.CATT   | 3 | 56993116 | 56993143 | 7       | ENSSSCT0000008955  | .       | intron     | -0.361 | rs786733285     | 3 |
| AG.CT       | 3 | 57188074 | 57188087 | 7       | ENSSSCT0000008955  | .       | intron     | .      | rs793736078     | 2 |
| AAAC.GTTT   | 3 | 57239155 | 57239183 | 7.25    | .                  | .       | intergenic | -0.03  | rs789803412     | 3 |
| AAAAG.CTTTT | 3 | 57492965 | 57492998 | 6.8     | ENSSSCT0000008958  | REV1    | intron     | 2.45   | .               | 4 |
| AT.AT       | 3 | 57655239 | 57655261 | 11.5    | ENSSSCT00000024738 | LYG2    | intron     | 0.091  | rs787313547     | 3 |
| AAAAC.GTTTT | 3 | 57776240 | 57776267 | 4.66667 | ENSSSCT0000008965  | TSGA10  | cds        | 0.376  | rs791797830     | 2 |
| AG.CT       | 3 | 57893469 | 57893479 | 5.5     | .                  | .       | intergenic | 0.008  | .               | 2 |
| AAAC.GTTT   | 3 | 57944128 | 57944163 | 9       | .                  | .       | intergenic | .      | rs788853730     | 2 |
| AAACC.GTTT  | 3 | 57997941 | 57997960 | 3.33333 | .                  | .       | intergenic | -0.177 | .               | 2 |
| AAAAC.GTTTT | 3 | 58405220 | 58405261 | 8.4     | .                  | .       | intergenic | .      | .               | 2 |
| AAAAC.GTTTT | 3 | 58828318 | 58828342 | 4.16667 | .                  | .       | intergenic | 0.05   | rs790796831     | 2 |
| AAAT.ATTT   | 3 | 59148350 | 59148366 | 4.25    | ENSSSCT00000035625 | ZAP70   | intron     | .      | rs792618811     | 2 |
| AAAT.ATTT   | 3 | 59148350 | 59148366 | 4.25    | ENSSSCT00000036079 | ZAP70   | intron     | .      | rs792618811     | 2 |
| AAAT.ATTT   | 3 | 59148350 | 59148366 | 4.25    | ENSSSCT0000008972  | ZAP70   | intron     | .      | rs792618811     | 2 |
| AAAT.ATTT   | 3 | 59477044 | 59477056 | 3.25    | ENSSSCT0000008980  | .       | intron     | .      | rs358375 rs7909 | 2 |
| ACAAT.ATTGT | 3 | 59508393 | 59508420 | 4.66667 | .                  | .       | intergenic | 0.372  | rs703238455     | 2 |
| AAC.GTT     | 3 | 60247356 | 60247382 | 9       | .                  | .       | intergenic | -0.313 | rs719431 rs7882 | 3 |
| AAC.GTT     | 3 | 60394187 | 60394203 | 5.66667 | .                  | .       | intergenic | .      | rs791882021     | 2 |
| AG.CT       | 3 | 60621097 | 60621108 | 6       | ENSSSCT00000033509 | CD8B    | intron     | -0.079 | rs790723495     | 2 |
| AG.CT       | 3 | 60621097 | 60621108 | 6       | ENSSSCT0000008994  | CD8B    | intron     | -0.079 | rs790723495     | 2 |
| AG.CT       | 3 | 60621097 | 60621108 | 6       | ENSSSCT00000033653 | CD8B    | intron     | -0.079 | rs790723495     | 2 |
| AG.CT       | 3 | 60621097 | 60621108 | 6       | ENSSSCT00000034821 | CD8B    | intron     | -0.079 | rs790723495     | 2 |
| AC.GT       | 3 | 60780895 | 60780907 | 6.5     | .                  | .       | intergenic | .      | rs789917204     | 3 |
| AAAAG.CTTTT | 3 | 60818602 | 60818626 | 5       | ENSSSCT0000008997  | RMND5A  | intron     | .      | rs789515303     | 2 |
| AT.AT       | 3 | 60966749 | 60966761 | 6.5     | ENSSSCT00000031530 | .       | intron     | 0.111  | rs788521123     | 2 |
| AAAT.ATTT   | 3 | 61170368 | 61170394 | 6.75    | .                  | .       | intergenic | .      | .               | 2 |
| AG.CT       | 3 | 61192762 | 61192788 | 13.5    | .                  | .       | intergenic | 0.106  | rs791475660     | 2 |
| AT.AT       | 3 | 61460580 | 61460590 | 5.5     | ENSSSCT00000030815 | IMMT    | intron     | .      | rs788101578     | 2 |
| AAT.ATT     | 3 | 61719636 | 61719648 | 4.33333 | .                  | .       | intergenic | .      | .               | 3 |
| AAAC.GTTT   | 3 | 61726263 | 61726277 | 3.75    | ENSSSCT00000025660 | .       | intron     | 0.078  | rs741180 rs7871 | 2 |
| AC.GT       | 3 | 61751027 | 61751039 | 6.5     | .                  | .       | intergenic | 0.083  | rs792328867     | 2 |
| AAAT.ATTT   | 3 | 62012551 | 62012567 | 4.25    | .                  | .       | intergenic | .      | rs786225079     | 2 |

|             |   |          |          |         |                    |        |            |        |                    |   |
|-------------|---|----------|----------|---------|--------------------|--------|------------|--------|--------------------|---|
| AAAAT.ATTTT | 3 | 62034309 | 62034332 | 4.8     | ENSSSCT00000009013 | ATOH8  | intron     | -0.211 | rs788129432        | 2 |
| AG.CT       | 3 | 62158668 | 62158692 | 12.5    | .                  | .      | intergenic | -0.014 | rs791868086        | 4 |
| AAAC.GTTT   | 3 | 62197861 | 62197881 | 5.25    | ENSSSCT00000027775 | .      | intron     | .      | rs793274522        | 2 |
| AAAG.CTTT   | 3 | 62388137 | 62388151 | 3.75    | .                  | .      | intergenic | .      | rs750588 rs7063    | 2 |
| AAAC.GTTT   | 3 | 62424214 | 62424230 | 4.25    | .                  | .      | intergenic | -0.433 | rs789249119        | 2 |
| AC.GT       | 3 | 62606985 | 62606995 | 5.5     | .                  | .      | intergenic | 0.115  | .                  | 2 |
| AC.GT       | 3 | 62708769 | 62708787 | 9.5     | .                  | .      | intergenic | 0.639  | rs791220368        | 2 |
| AC.GT       | 3 | 62885802 | 62885816 | 7.5     | .                  | .      | intergenic | 0.029  | rs7913649 rs7868   | 2 |
| ACAT.ATGT   | 3 | 62915694 | 62915707 | 3.5     | .                  | .      | intergenic | -0.205 | rs789643936        | 2 |
| AT.AT       | 3 | 63005707 | 63005716 | 5       | .                  | .      | intergenic | .      | rs786279021        | 2 |
| AAAT.ATTT   | 3 | 63033490 | 63033509 | 5       | .                  | .      | intergenic | 0.197  | rs790112302        | 2 |
| AAAC.GTTT   | 3 | 63066351 | 63066367 | 4.25    | .                  | .      | intergenic | 0.168  | .                  | 2 |
| AATC.GATT   | 3 | 63377320 | 63377339 | 5       | .                  | .      | intergenic | .      | rs7969170 rs7896   | 2 |
| AT.AT       | 3 | 63411806 | 63411820 | 7.5     | .                  | .      | intergenic | 0.031  | rs790257207        | 2 |
| AAAC.GTTT   | 3 | 63723823 | 63723837 | 3.75    | .                  | .      | intergenic | .      | .                  | 2 |
| AAAAT.ATTTT | 3 | 63801213 | 63801230 | 3.6     | .                  | .      | intergenic | 0.112  | rs79275565 rs7929  | 2 |
| AT.AT       | 3 | 63875483 | 63875495 | 6.5     | .                  | .      | intergenic | 0.03   | rs792602480        | 2 |
| AT.AT       | 3 | 64003820 | 64003831 | 6       | .                  | .      | intergenic | 0.144  | rs787053880        | 2 |
| AC.GT       | 3 | 64049338 | 64049348 | 5.5     | .                  | .      | intergenic | .      | rs791366628        | 2 |
| AAAC.GTTT   | 3 | 64105405 | 64105423 | 4.75    | .                  | .      | intergenic | .      | rs788470526        | 2 |
| AAAC.GTTT   | 3 | 64109806 | 64109820 | 3.75    | .                  | .      | intergenic | -0.032 | rs790924686        | 2 |
| AAAAC.GTTTT | 3 | 64145656 | 64145685 | 6       | .                  | .      | intergenic | .      | rs790005156        | 2 |
| AG.CT       | 3 | 64314197 | 64314209 | 6.5     | .                  | .      | intergenic | -0.131 | .                  | 3 |
| AC.GT       | 3 | 64322258 | 64322272 | 7.5     | .                  | .      | intergenic | -0.414 | rs78180767 rs7891  | 8 |
| AAAAT.ATTTT | 3 | 64361948 | 64361969 | 4.4     | .                  | .      | intergenic | .      | .                  | 2 |
| AT.AT       | 3 | 64437162 | 64437171 | 5       | .                  | .      | intergenic | 0.071  | rs793094715        | 2 |
| AAAC.GTTT   | 3 | 64486732 | 64486762 | 7.75    | .                  | .      | intergenic | -0.146 | rs7822037 rs7881   | 2 |
| AT.AT       | 3 | 64604258 | 64604275 | 9       | .                  | .      | intergenic | -0.159 | rs78241871 rs7881  | 2 |
| AAAC.GTTT   | 3 | 64607089 | 64607113 | 6.25    | .                  | .      | intergenic | -0.081 | rs791750228        | 2 |
| AC.GT       | 3 | 64618223 | 64618232 | 5       | .                  | .      | intergenic | 0.095  | .                  | 3 |
| AAC.GTT     | 3 | 64641821 | 64641837 | 5.66667 | .                  | .      | intergenic | -0.123 | rs790558409        | 2 |
| AAAC.GTTT   | 3 | 64832020 | 64832047 | 7       | .                  | .      | intergenic | -0.097 | rs790701306 rs7866 | 2 |
| AT.AT       | 3 | 64871988 | 64872010 | 11.5    | .                  | .      | intergenic | -0.234 | rs78343966 rs7113  | 2 |
| AAT.ATT     | 3 | 64952556 | 64952568 | 4.33333 | .                  | .      | intergenic | 0.104  | .                  | 2 |
| AAAG.CTTT   | 3 | 64955818 | 64955832 | 3.75    | .                  | .      | intergenic | 0.157  | .                  | 2 |
| AAAT.ATTT   | 3 | 65052452 | 65052466 | 3.75    | .                  | .      | intergenic | -0.063 | rs791337103        | 2 |
| AAGGG.CCCTT | 3 | 65064666 | 65064683 | 3.6     | .                  | .      | intergenic | -0.108 | rs789823809        | 2 |
| AT.AT       | 3 | 65111738 | 65111747 | 5       | .                  | .      | intergenic | .      | .                  | 2 |
| AAT.ATT     | 3 | 65140787 | 65140798 | 4       | .                  | .      | intergenic | .      | rs788845407        | 2 |
| AAC.GTT     | 3 | 65271276 | 65271289 | 4.66667 | .                  | .      | intergenic | 0.047  | rs788720885        | 3 |
| AAC.GTT     | 3 | 65318156 | 65318173 | 6       | .                  | .      | intergenic | -0.18  | rs791266817        | 2 |
| AG.CT       | 3 | 65372924 | 65372937 | 7       | .                  | .      | intergenic | .      | .                  | 4 |
| AC.GT       | 3 | 65545824 | 65545835 | 6       | .                  | .      | intergenic | .      | .                  | 3 |
| AAGC.GCTT   | 3 | 65991358 | 65991374 | 4.25    | .                  | .      | intergenic | .      | rs78708737788      | 2 |
| AAAAG.CTTTT | 3 | 66013207 | 66013224 | 3.6     | .                  | .      | intergenic | -0.044 | rs793597171        | 2 |
| AG.CT       | 3 | 66023278 | 66023311 | 17      | .                  | .      | intergenic | .      | rs78180219 rs7896  | 4 |
| AC.GT       | 3 | 66066209 | 66066222 | 7       | .                  | .      | intergenic | 0.375  | rs789498643        | 2 |
| AG.CT       | 3 | 66301903 | 66301912 | 5       | ENSSSCT00000009036 | .      | intron     | -0.109 | .                  | 4 |
| AT.AT       | 3 | 66345080 | 66345101 | 11      | ENSSSCT00000009036 | .      | intron     | 0.123  | rs78141255 rs7892  | 2 |
| AAG.CTT     | 3 | 66479207 | 66479219 | 4.33333 | ENSSSCT00000009036 | .      | intron     | 0.459  | rs786301574        | 2 |
| AAATG.CATTT | 3 | 66538817 | 66538836 | 4       | ENSSSCT00000009036 | .      | intron     | 0.296  | rs78686422 rs7921  | 2 |
| AAAC.GTTT   | 3 | 66549757 | 66549791 | 8.75    | ENSSSCT00000009036 | .      | intron     | .      | rs79290029 rs7912  | 3 |
| AAAC.GTTT   | 3 | 66691237 | 66691261 | 6.25    | .                  | .      | intergenic | 0.273  | rs791375308        | 2 |
| AG.CT       | 3 | 66703078 | 66703111 | 17      | .                  | .      | intergenic | 1.389  | rs786468125        | 4 |
| AAATT.AATTT | 3 | 66847623 | 66847637 | 3       | .                  | .      | intergenic | .      | .                  | 2 |
| AAAC.GTTT   | 3 | 66876555 | 66876573 | 4.75    | .                  | .      | intergenic | -0.417 | rs790869342        | 2 |
| AG.CT       | 3 | 67075708 | 67075720 | 6.5     | .                  | .      | intergenic | -0.071 | rs78571551 rs7892  | 2 |
| ATC.GAT     | 3 | 67109453 | 67109468 | 5.33333 | .                  | .      | intergenic | -0.197 | rs78516488 rs7904  | 2 |
| AT.AT       | 3 | 67293740 | 67293750 | 5.5     | ENSSSCT00000009040 | CTNNA2 | intron     | -0.051 | rs789090427        | 2 |
| AAAT.ATTT   | 3 | 67302455 | 67302469 | 3.75    | ENSSSCT00000009040 | CTNNA2 | intron     | -0.183 | rs78342682 rs7923  | 2 |
| AAAC.GTTT   | 3 | 67802583 | 67802601 | 4.75    | .                  | .      | intergenic | .      | rs78787541453      | 2 |
| AT.AT       | 3 | 67827215 | 67827227 | 6.5     | .                  | .      | intergenic | .      | rs792353205        | 4 |
| AC.GT       | 3 | 67870100 | 67870110 | 5.5     | .                  | .      | intergenic | -0.097 | rs788179133        | 3 |
| AAG.CTT     | 3 | 67918573 | 67918584 | 4       | .                  | .      | intergenic | .      | rs7878638043       | 2 |
| AT.AT       | 3 | 68046143 | 68046155 | 6.5     | .                  | .      | intergenic | -0.21  | rs791667769        | 3 |
| AAAT.ATTT   | 3 | 68325851 | 68325876 | 6.5     | .                  | .      | intergenic | 0.063  | rs788849747        | 2 |
| AC.GT       | 3 | 68512803 | 68512817 | 7.5     | .                  | .      | intergenic | .      | rs78359054 rs7879  | 2 |
| AT.AT       | 3 | 68570459 | 68570481 | 11.5    | .                  | .      | intergenic | .      | rs790775884        | 2 |
| AGAT.ATCT   | 3 | 68877765 | 68877779 | 3.75    | .                  | .      | intergenic | -0.065 | rs791900267        | 2 |
| AAAAT.ATTTT | 3 | 68968644 | 68968662 | 3.8     | .                  | .      | intergenic | .      | .                  | 2 |
| AAAC.GTTT   | 3 | 69020704 | 69020728 | 6.25    | .                  | .      | intergenic | .      | .                  | 4 |
| AC.GT       | 3 | 69066934 | 69066947 | 7       | .                  | .      | intergenic | .      | .                  | 3 |
| AAC.GTT     | 3 | 69279689 | 69279712 | 8       | .                  | .      | intergenic | 0.043  | rs789843558        | 2 |
| AT.AT       | 3 | 69433931 | 69433950 | 10      | .                  | .      | intergenic | -0.061 | rs787157579        | 2 |
| AAC.GTT     | 3 | 69489962 | 69489978 | 5.66667 | .                  | .      | intergenic | -0.023 | rs789741366        | 3 |
| AAAAC.GTTTT | 3 | 69556808 | 69556828 | 4.2     | .                  | .      | intergenic | .      | rs792117877        | 2 |
| AAAC.GTTT   | 3 | 69656919 | 69656944 | 6.5     | .                  | .      | intergenic | 0.163  | rs78234521 rs7878  | 4 |
| AAAAT.ATTTT | 3 | 69694724 | 69694746 | 4.6     | .                  | .      | intergenic | .      | rs790508552        | 2 |
| AG.CT       | 3 | 69845193 | 69845211 | 9.5     | .                  | .      | intergenic | -0.001 | rs793818419        | 4 |
| AT.AT       | 3 | 69873491 | 69873506 | 8       | .                  | .      | intergenic | -0.047 | rs787000701        | 2 |
| AC.GT       | 3 | 69883953 | 69883976 | 12      | .                  | .      | intergenic | 0.027  | rs787973599        | 2 |
| AAAAG.CTTTT | 3 | 69919100 | 69919121 | 3.66667 | .                  | .      | intergenic | -0.213 | rs78388662 rs7926  | 2 |
| AAAC.GTTT   | 3 | 70037428 | 70037447 | 5       | .                  | .      | intergenic | -0.038 | .                  | 3 |
| AAAC.GTTT   | 3 | 70044614 | 70044636 | 5.75    | .                  | .      | intergenic | 0.002  | rs692417613        | 2 |

|             |   |          |          |         |                    |        |            |        |             |   |
|-------------|---|----------|----------|---------|--------------------|--------|------------|--------|-------------|---|
| AAC.GTT     | 3 | 70081463 | 70081476 | 4.66667 | .                  | .      | intergenic | -0.229 | rs790375198 | 2 |
| AAT.ATT     | 3 | 70220104 | 70220120 | 5.66667 | .                  | .      | intergenic | -0.075 | .           | 2 |
| AGAT.ATCT   | 3 | 70298457 | 70298475 | 4.75    | .                  | .      | intergenic | -0.01  | rs789715611 | 2 |
| AAC.GTT     | 3 | 70349329 | 70349348 | 6.66667 | .                  | .      | intergenic | .      | rs791721503 | 2 |
| AAT.ATT     | 3 | 70384560 | 70384571 | 4       | .                  | .      | intergenic | -0.004 | rs792615491 | 2 |
| AAAT.ATTT   | 3 | 70421368 | 70421397 | 7.5     | .                  | .      | intergenic | 0.134  | rs790180251 | 2 |
| AC.GT       | 3 | 70424037 | 70424064 | 14      | .                  | .      | intergenic | 1.091  | rs789980403 | 4 |
| AGG.CCT     | 3 | 71074117 | 71074130 | 4.66667 | .                  | .      | intergenic | 0.185  | rs791714990 | 2 |
| AAAC.GTTT   | 3 | 71105412 | 71105423 | 3       | ENSSSCT00000023158 | MRPL19 | 3'utr      | .      | .           | 2 |
| AC.GT       | 3 | 71453836 | 71453872 | 18.5    | .                  | .      | intergenic | -0.138 | rs791406410 | 2 |
| AT.AT       | 3 | 71519704 | 71519715 | 6       | .                  | .      | intergenic | 0.113  | rs793518493 | 2 |
| AAAG.CTTT   | 3 | 71617772 | 71617783 | 3       | ENSSSCT00000009049 | M1AP   | intron     | .      | rs792467269 | 2 |
| AAAG.CTTT   | 3 | 71746418 | 71746436 | 4.75    | ENSSSCT00000009054 | AUP1   | intron     | 0.105  | rs793045219 | 2 |
| AATG.CATT   | 3 | 71831003 | 71831029 | 6.75    | ENSSSCT00000009054 | AUP1   | intron     | -0.11  | rs792896544 | 2 |
| AAG.CTT     | 3 | 71863802 | 71863818 | 5.66667 | ENSSSCT00000009065 | .      | promoter   | 0.045  | rs793003089 | 2 |
| AAG.CTT     | 3 | 71873861 | 71873886 | 8.66667 | ENSSSCT00000009066 | LBX2   | promoter   | -0.016 | rs792518040 | 3 |
| AT.AT       | 3 | 72381108 | 72381120 | 6.5     | ENSSSCT00000009091 | STAMPB | intron     | 0.157  | rs786939946 | 2 |
| AT.AT       | 3 | 72563191 | 72563200 | 5       | .                  | .      | intergenic | 0.182  | .           | 4 |
| AAC.GTT     | 3 | 72626791 | 72626810 | 6.66667 | .                  | .      | intergenic | 0.219  | .           | 4 |
| AC.GT       | 3 | 72729683 | 72729693 | 5.5     | .                  | .      | intergenic | -0.073 | rs790803160 | 2 |
| AAAT.ATTT   | 3 | 73443640 | 73443663 | 6       | .                  | .      | intergenic | .      | .           | 2 |
| AC.GT       | 3 | 74059213 | 74059229 | 8.5     | .                  | .      | intergenic | .      | .           | 2 |
| AAAC.GTTT   | 3 | 74229873 | 74229887 | 3.75    | .                  | .      | intergenic | .      | rs789400673 | 2 |
| AC.GT       | 3 | 74252027 | 74252037 | 5.5     | .                  | .      | intergenic | -0.058 | rs797414    | 2 |
| AG.CT       | 3 | 74373332 | 74373345 | 7       | .                  | .      | intergenic | 0.075  | rs791470502 | 2 |
| AC.GT       | 3 | 74410699 | 74410713 | 7.5     | .                  | .      | intergenic | .      | .           | 3 |
| AC.GT       | 3 | 74472764 | 74472779 | 8       | ENSSSCT00000009103 | DYSF   | intron     | -0.136 | .           | 2 |
| AC.GT       | 3 | 74559439 | 74559449 | 5.5     | ENSSSCT00000009103 | DYSF   | intron     | -0.013 | .           | 2 |
| AG.CT       | 3 | 74839718 | 74839732 | 7.5     | .                  | .      | intergenic | .      | rs786387139 | 2 |
| ATC.GAT     | 3 | 74863532 | 74863554 | 7.66667 | .                  | .      | intergenic | 0.261  | rs788434435 | 2 |
| AAAC.GTTT   | 3 | 74865462 | 74865482 | 5.25    | .                  | .      | intergenic | 0.326  | rs792203158 | 2 |
| AAAAC.GTTTT | 3 | 75015716 | 75015740 | 5       | .                  | .      | intergenic | -0.123 | .           | 2 |
| AC.GT       | 3 | 75125050 | 75125061 | 6       | .                  | .      | intergenic | .      | .           | 2 |
| AAAG.CTTT   | 3 | 75610001 | 75610019 | 4.75    | .                  | .      | intergenic | -0.168 | rs786460534 | 2 |
| ATC.GAT     | 3 | 75827776 | 75827799 | 8       | .                  | .      | intergenic | 0.122  | rs790661251 | 3 |
| AT.AT       | 3 | 75877167 | 75877176 | 5       | .                  | .      | intergenic | -0.269 | .           | 4 |
| CACAG.CTGTG | 3 | 75931799 | 75931819 | 3.5     | ENSSSCT00000009126 | MXD1   | intron     | 0.153  | rs790634    | 2 |
| AGG.CCT     | 3 | 76003804 | 76003818 | 5       | ENSSSCT00000009127 | .      | intron     | 0.401  | .           | 2 |
| AG.CT       | 3 | 76111213 | 76111223 | 5.5     | ENSSSCT00000009128 | ANXA4  | intron     | 0.035  | .           | 3 |
| ACAG.CTGT   | 3 | 76147209 | 76147222 | 3.5     | .                  | .      | intergenic | -0.01  | rs790186859 | 2 |
| AAAC.GTTT   | 3 | 76216374 | 76216388 | 3.75    | .                  | .      | intergenic | .      | rs788040403 | 2 |
| AAAC.GTTT   | 3 | 76283156 | 76283180 | 6.25    | ENSSSCT00000009130 | AAK1   | intron     | 0.081  | .           | 2 |
| AAAG.CTTT   | 3 | 76520931 | 76520943 | 3.25    | .                  | .      | intergenic | 0.16   | rs793814819 | 2 |
| AAAC.GTTT   | 3 | 76554021 | 76554047 | 6.75    | .                  | .      | intergenic | .      | rs786741692 | 2 |
| AC.GT       | 3 | 76621069 | 76621080 | 6       | ENSSSCT00000009134 | ANTXR1 | intron     | 0.06   | rs792927723 | 2 |
| AAAG.CTTT   | 3 | 76667819 | 76667836 | 4.5     | ENSSSCT00000009134 | ANTXR1 | intron     | -0.104 | rs793525297 | 2 |
| AAAC.GTTT   | 3 | 76807945 | 76807963 | 4.75    | ENSSSCT00000009134 | ANTXR1 | intron     | .      | rs788577922 | 2 |
| AAC.GTT     | 3 | 77283586 | 77283605 | 6.66667 | .                  | .      | intergenic | 0.204  | rs791130116 | 4 |
| AG.CT       | 3 | 77360425 | 77360436 | 6       | ENSSSCT00000009140 | APLF   | intron     | 0.076  | .           | 2 |
| AG.CT       | 3 | 77360425 | 77360436 | 6       | ENSSSCT00000009141 | FBXO48 | promoter   | 0.076  | .           | 2 |
| AATT.AATT   | 3 | 77643127 | 77643142 | 4       | .                  | .      | intergenic | 0.007  | rs791932898 | 2 |
| AAAT.ATTT   | 3 | 77645466 | 77645488 | 5.75    | .                  | .      | intergenic | -0.037 | rs793579987 | 2 |
| AC.GT       | 3 | 77657161 | 77657171 | 5.5     | .                  | .      | intergenic | 0.035  | .           | 2 |
| AAAC.GTTT   | 3 | 77721672 | 77721693 | 5.5     | .                  | .      | intergenic | .      | rs793332583 | 3 |
| AAG.CTT     | 3 | 77925315 | 77925327 | 4.33333 | .                  | .      | intergenic | 0.359  | rs787199631 | 2 |
| AC.GT       | 3 | 77985710 | 77985719 | 5       | .                  | .      | intergenic | -0.168 | .           | 2 |
| CACAG.CTGTG | 3 | 77990885 | 77990910 | 4.33333 | .                  | .      | intergenic | -0.051 | rs789181190 | 2 |
| AAAC.GTTT   | 3 | 78071010 | 78071036 | 6.75    | .                  | .      | intergenic | 0.594  | rs792073410 | 2 |
| AAAC.GTTT   | 3 | 78153407 | 78153429 | 5.75    | .                  | .      | intergenic | 0.404  | rs793156286 | 3 |
| AAC.GTT     | 3 | 78265147 | 78265164 | 6       | .                  | .      | intergenic | .      | rs793625368 | 2 |
| AAAT.ATTT   | 3 | 78312629 | 78312652 | 6       | .                  | .      | intergenic | .      | rs793110439 | 2 |
| AT.AT       | 3 | 78314264 | 78314280 | 8.5     | .                  | .      | intergenic | .      | rs788975633 | 2 |
| AAAC.GTTT   | 3 | 78317993 | 78318006 | 3.5     | .                  | .      | intergenic | .      | rs792600513 | 2 |
| AC.GT       | 3 | 78332195 | 78332205 | 5.5     | .                  | .      | intergenic | 0.082  | rs791711779 | 2 |
| AAC.GTT     | 3 | 78502611 | 78502625 | 5       | .                  | .      | intergenic | 0.212  | rs793062317 | 2 |
| AAAC.GTTT   | 3 | 78577938 | 78577956 | 4.75    | .                  | .      | intergenic | 0.179  | rs790829    | 2 |
| AC.GT       | 3 | 78591128 | 78591137 | 5       | .                  | .      | intergenic | -0.285 | .           | 2 |
| AAAT.ATTT   | 3 | 78599544 | 78599562 | 4.75    | .                  | .      | intergenic | -0.061 | rs792644842 | 2 |
| AAAC.GTTT   | 3 | 78961986 | 78962005 | 5       | .                  | .      | intergenic | 0.09   | rs789413936 | 2 |
| AC.GT       | 3 | 79030432 | 79030442 | 5.5     | .                  | .      | intergenic | 0.166  | rs79862     | 2 |
| AAAG.CTTT   | 3 | 79256888 | 79256906 | 4.75    | .                  | .      | intergenic | 0.976  | rs7935      | 2 |
| AAT.ATT     | 3 | 79413749 | 79413781 | 11      | .                  | .      | intergenic | 0.107  | rs787650289 | 2 |
| AG.CT       | 3 | 79481548 | 79481558 | 5.5     | .                  | .      | intergenic | 0.077  | rs790861052 | 2 |
| AAAC.GTTT   | 3 | 79799653 | 79799667 | 3.75    | .                  | .      | intergenic | 0.076  | rs790792578 | 2 |
| ACTC.GAGT   | 3 | 79856508 | 79856530 | 5.75    | .                  | .      | intergenic | 0.08   | rs7921105   | 2 |
| AC.GT       | 3 | 79900740 | 79900750 | 5.5     | .                  | .      | intergenic | 0.162  | rs787108968 | 4 |
| AAAG.CTTT   | 3 | 80084228 | 80084239 | 3       | .                  | .      | intergenic | .      | .           | 2 |
| AAAC.GTTT   | 3 | 80166867 | 80166887 | 5.25    | .                  | .      | intergenic | 0.158  | rs788499942 | 2 |
| AAAAG.CTTTT | 3 | 80294181 | 80294204 | 4.8     | .                  | .      | intergenic | .      | rs786712624 | 2 |
| AT.AT       | 3 | 80670789 | 80670804 | 8       | .                  | .      | intergenic | .      | rs791772707 | 3 |
| AAAC.GTTT   | 3 | 80753419 | 80753441 | 5.75    | ENSSSCT00000024583 | .      | intron     | -0.012 | rs787690095 | 2 |
| AAAT.ATTT   | 3 | 81028486 | 81028504 | 4.75    | .                  | .      | intergenic | 0.193  | rs787838005 | 2 |
| AATG.CATT   | 3 | 81166763 | 81166781 | 4.75    | .                  | .      | intergenic | -0.077 | rs7918907   | 2 |
| AAC.GTT     | 3 | 81327236 | 81327249 | 4.66667 | ENSSSCT00000030136 | .      | promoter   | 0.264  | rs788481606 | 2 |

|              |   |          |          |         |                    |        |            |        |               |   |
|--------------|---|----------|----------|---------|--------------------|--------|------------|--------|---------------|---|
| AT.AT        | 3 | 81358479 | 81358488 | 5       | .                  | .      | intergenic | -0.178 | rs791270067   | 2 |
| AT.AT        | 3 | 81557990 | 81557999 | 5       | .                  | .      | intergenic | .      | rs790473996   | 2 |
| AAC.GTT      | 3 | 81604966 | 81604979 | 4.66667 | ENSSSCT00000028590 | .      | intron     | 0.302  | rs792812239   | 2 |
| ACAT.ATGT    | 3 | 81796755 | 81796773 | 4.75    | .                  | .      | intergenic | 0.289  | 56161 rs7895  | 2 |
| AG.CT        | 3 | 82108068 | 82108079 | 6       | .                  | .      | intergenic | .      | .             | 3 |
| AT.AT        | 3 | 82469516 | 82469525 | 5       | .                  | .      | intergenic | 0.523  | 322515 rs7871 | 2 |
| AG.CT        | 3 | 82670980 | 82670990 | 5.5     | .                  | .      | intergenic | 2.262  | rs792856320   | 2 |
| AC.GT        | 3 | 82810840 | 82810870 | 15.5    | .                  | .      | intergenic | .      | rs788907618   | 2 |
| AAAAC.GTTTT  | 3 | 82946284 | 82946304 | 4.2     | .                  | .      | intergenic | 0.152  | 327597 rs7875 | 2 |
| AC.GT        | 3 | 83261922 | 83261934 | 6.5     | .                  | .      | intergenic | .      | .             | 2 |
| AAC.GTT      | 3 | 83544642 | 83544658 | 5.66667 | .                  | .      | intergenic | 0.176  | 307934 rs7931 | 2 |
| AAC.GTT      | 3 | 83842812 | 83842825 | 4.66667 | .                  | .      | intergenic | .      | rs789302385   | 2 |
| AAAT.ATTT    | 3 | 84984734 | 84984752 | 4.75    | ENSSSCT00000009185 | REL    | intron     | 0.065  | rs790365270   | 2 |
| AAAC.GTTT    | 3 | 84988643 | 84988661 | 4.75    | ENSSSCT00000009185 | REL    | intron     | 0.019  | rs788034905   | 2 |
| AG.CT        | 3 | 85157237 | 85157249 | 6.5     | .                  | .      | intergenic | .      | rs787004227   | 2 |
| AAG.CTT      | 3 | 85223587 | 85223610 | 8       | .                  | .      | intergenic | 0.526  | rs793010251   | 2 |
| AC.GT        | 3 | 85460461 | 85460483 | 11.5    | .                  | .      | intergenic | 0.161  | .             | 2 |
| AAAC.GTTT    | 3 | 85748055 | 85748090 | 9       | .                  | .      | intergenic | -0.115 | 386391 rs7901 | 2 |
| AG.CT        | 3 | 85823034 | 85823061 | 14      | .                  | .      | intergenic | 0.003  | rs790490510   | 2 |
| AC.GT        | 3 | 86055984 | 86055998 | 7.5     | .                  | .      | intergenic | 0.262  | rs787897799   | 3 |
| AC.GT        | 3 | 86114397 | 86114411 | 7.5     | .                  | .      | intergenic | .      | 381438 rs7865 | 5 |
| AC.GT        | 3 | 86221712 | 86221727 | 8       | .                  | .      | intergenic | 1.354  | .             | 3 |
| AG.CT        | 3 | 86232296 | 86232310 | 7.5     | .                  | .      | intergenic | 0.239  | rs791281821   | 2 |
| AT.AT        | 3 | 86246305 | 86246323 | 9.5     | .                  | .      | intergenic | 0.134  | .             | 2 |
| AAAT.ATTT    | 3 | 86375061 | 86375078 | 4.5     | .                  | .      | intergenic | 0.01   | 386902 rs7883 | 2 |
| AAAC.GTTT    | 3 | 86421253 | 86421279 | 6.75    | .                  | .      | intergenic | 0.017  | 313163 rs7909 | 2 |
| AC.GT        | 3 | 86527505 | 86527515 | 5.5     | .                  | .      | intergenic | 0.294  | .             | 3 |
| AAATT.AATTT  | 3 | 86551620 | 86551638 | 3.8     | .                  | .      | intergenic | 0.081  | rs793580083   | 2 |
| AAAT.ATTT    | 3 | 86736142 | 86736164 | 5.75    | .                  | .      | intergenic | 0.007  | rs793504276   | 2 |
| AAAAC.GTTTT  | 3 | 86823342 | 86823366 | 5       | .                  | .      | intergenic | -0.058 | rs787066139   | 2 |
| AC.GT        | 3 | 86985821 | 86985835 | 7.5     | .                  | .      | intergenic | .      | .             | 2 |
| AG.CT        | 3 | 87042989 | 87043002 | 7       | .                  | .      | intergenic | 0.899  | rs788704220   | 2 |
| AT.AT        | 3 | 87182468 | 87182477 | 5       | .                  | .      | intergenic | 1.301  | rs789684120   | 2 |
| ACAG.CTGT    | 3 | 87219965 | 87219991 | 6.75    | .                  | .      | intergenic | -0.064 | rs791322659   | 2 |
| AAAAT.GTTTT  | 3 | 87561285 | 87561304 | 4       | .                  | .      | intergenic | 0.563  | rs792612432   | 2 |
| AAAAC.GTTTT  | 3 | 87637724 | 87637748 | 5       | .                  | .      | intergenic | -0.26  | .             | 2 |
| AAAAC.GTTTT  | 3 | 88056120 | 88056134 | 3       | ENSSSCT00000009192 | VRK2   | intron     | .      | rs786739719   | 2 |
| AAAT.ATTT    | 3 | 88060017 | 88060039 | 5.75    | ENSSSCT00000009192 | VRK2   | intron     | 0.196  | rs786651940   | 2 |
| AT.AT        | 3 | 88247084 | 88247094 | 5.5     | .                  | .      | intergenic | 0.187  | rs788302290   | 2 |
| AT.AT        | 3 | 88483069 | 88483083 | 7.5     | .                  | .      | intergenic | .      | rs790980392   | 2 |
| AAAG.CTTT    | 3 | 88513104 | 88513126 | 5.75    | .                  | .      | intergenic | -0.079 | rs787944015   | 2 |
| AAAC.GTTT    | 3 | 88630083 | 88630099 | 4.25    | .                  | .      | intergenic | 0.092  | rs788944176   | 2 |
| AAC.GTT      | 3 | 88874567 | 88874580 | 4.66667 | .                  | .      | intergenic | 0.1    | rs788045280   | 2 |
| AT.AT        | 3 | 88899445 | 88899456 | 6       | .                  | .      | intergenic | .      | 383000 rs7862 | 2 |
| AGATAT.ATATC | 3 | 88909158 | 88909186 | 4.83333 | .                  | .      | intergenic | -0.173 | 353054 rs7905 | 2 |
| AG.CT        | 3 | 88948328 | 88948338 | 5.5     | .                  | .      | intergenic | .      | rs790543712   | 2 |
| AT.AT        | 3 | 88953185 | 88953194 | 5       | .                  | .      | intergenic | -0.095 | 178031 rs7882 | 2 |
| AT.AT        | 3 | 88963436 | 88963445 | 5       | .                  | .      | intergenic | 0.119  | rs792166769   | 2 |
| AAC.GTT      | 3 | 89070809 | 89070824 | 5.33333 | .                  | .      | intergenic | .      | rs791945823   | 2 |
| AT.AT        | 3 | 89152486 | 89152507 | 11      | .                  | .      | intergenic | .      | .             | 4 |
| AT.AT        | 3 | 89168887 | 89168898 | 6       | .                  | .      | intergenic | 0.125  | rs787272654   | 3 |
| AG.CT        | 3 | 89221570 | 89221589 | 10      | .                  | .      | intergenic | .      | .             | 3 |
| AAAC.GTTT    | 3 | 89373092 | 89373119 | 7       | .                  | .      | intergenic | 0.06   | rs786358257   | 2 |
| AAAC.GTTT    | 3 | 89764134 | 89764147 | 3.5     | ENSSSCT00000009193 | .      | intron     | .      | rs788940478   | 2 |
| AAAT.ATTT    | 3 | 89838763 | 89838785 | 5.75    | ENSSSCT00000009193 | .      | intron     | -0.117 | 372962 rs7905 | 2 |
| AG.CT        | 3 | 89943980 | 89944000 | 10.5    | .                  | .      | intergenic | 0.141  | .             | 2 |
| AC.GT        | 3 | 90139903 | 90139923 | 10.5    | ENSSSCT00000009194 | EFEMP1 | intron     | 1.064  | .             | 3 |
| AC.GT        | 3 | 90191165 | 90191199 | 17.5    | ENSSSCT00000009194 | EFEMP1 | intron     | 0.271  | rs789236620   | 3 |
| AAAT.ATTT    | 3 | 90750562 | 90750582 | 5.25    | ENSSSCT00000009201 | MTIF2  | intron     | 2.367  | rs790305446   | 2 |
| AAAT.ATTT    | 3 | 90775286 | 90775300 | 3.75    | ENSSSCT00000026044 | RPS27A | intron     | 1.64   | rs793701981   | 2 |
| AT.AT        | 3 | 90805609 | 90805621 | 6.5     | ENSSSCT00000009199 | CLHC1  | intron     | .      | rs789469141   | 3 |
| AAAAC.GTTTT  | 3 | 90844289 | 90844325 | 7.4     | .                  | .      | intergenic | -0.009 | rs786310564   | 2 |
| ACC.GGT      | 3 | 90884328 | 90884347 | 6.66667 | .                  | .      | intergenic | .      | rs789801513   | 3 |
| AAT.ATT      | 3 | 91147213 | 91147230 | 6       | ENSSSCT00000009205 | RTN4   | intron     | 0.04   | rs789224129   | 2 |
| AAT.ATT      | 3 | 91147213 | 91147230 | 6       | ENSSSCT00000032131 | EML6   | intron     | 0.04   | rs789224129   | 2 |
| AAC.GTT      | 3 | 91265987 | 91265999 | 4.33333 | .                  | .      | intergenic | 0.119  | rs787617788   | 6 |
| AAAAC.GTTTT  | 3 | 91285285 | 91285303 | 3.8     | .                  | .      | intergenic | .      | rs789344168   | 2 |
| AAT.ATT      | 3 | 91331105 | 91331123 | 6.33333 | .                  | .      | intergenic | 0.206  | .             | 2 |
| AT.AT        | 3 | 91384670 | 91384679 | 5       | .                  | .      | intergenic | 0.207  | rs787288524   | 2 |
| ATC.GAT      | 3 | 91728654 | 91728671 | 6       | .                  | .      | intergenic | 0.282  | rs789650928   | 2 |
| AAAAC.GTTTT  | 3 | 91786566 | 91786583 | 3.6     | .                  | .      | intergenic | .      | 102647 rs7923 | 2 |
| AAT.ATT      | 3 | 91866725 | 91866738 | 4.66667 | .                  | .      | intergenic | .      | .             | 2 |
| AATT.AATT    | 3 | 92030613 | 92030631 | 4.75    | .                  | .      | intergenic | -0.154 | 102176 rs7891 | 2 |
| AG.CT        | 3 | 92058356 | 92058367 | 6       | .                  | .      | intergenic | -0.097 | rs792041475   | 2 |
| AC.GT        | 3 | 92059526 | 92059538 | 6.5     | .                  | .      | intergenic | 0.055  | 392783 rs7873 | 2 |
| AG.CT        | 3 | 92073844 | 92073858 | 7.5     | ENSSSCT00000023995 | GPR115 | intron     | 0.82   | rs792207116   | 2 |
| AT.AT        | 3 | 92239168 | 92239178 | 5.5     | .                  | .      | intergenic | 0.225  | rs789633216   | 4 |
| AT.AT        | 3 | 92249093 | 92249116 | 12      | .                  | .      | intergenic | .      | rs793461866   | 2 |
| AC.GT        | 3 | 92297569 | 92297595 | 13.5    | .                  | .      | intergenic | .      | rs786646402   | 2 |
| AG.CT        | 3 | 92822863 | 92822873 | 5.5     | .                  | .      | intergenic | 0.232  | .             | 2 |
| AAAT.ATTT    | 3 | 92959695 | 92959721 | 6.75    | .                  | .      | intergenic | .      | rs790475272   | 2 |
| AAAAC.GTTTT  | 3 | 92991737 | 92991757 | 4.2     | .                  | .      | intergenic | .      | rs792517012   | 2 |
| AAAAT.ATTTT  | 3 | 92992482 | 92992499 | 3.6     | .                  | .      | intergenic | .      | rs789309032   | 2 |
| AAAC.GTTT    | 3 | 93009106 | 93009117 | 3       | .                  | .      | intergenic | -0.048 | rs788469028   | 2 |

|               |   |           |           |         |                    |         |            |        |               |   |
|---------------|---|-----------|-----------|---------|--------------------|---------|------------|--------|---------------|---|
| AG.CT         | 3 | 93038465  | 93038475  | 5.5     | .                  | .       | intergenic | .      | rs791461811   | 3 |
| AAT.ATT       | 3 | 93169330  | 93169350  | 7       | .                  | .       | intergenic | .      | 383556 rs7896 | 2 |
| AG.CT         | 3 | 93301112  | 93301121  | 5       | .                  | .       | intergenic | -0.08  | rs690243232   | 3 |
| AC.GT         | 3 | 93382452  | 93382466  | 7.5     | .                  | .       | intergenic | 0.128  | .             | 4 |
| AAT.ATT       | 3 | 93741993  | 93742010  | 6       | .                  | .       | intergenic | .      | .             | 2 |
| AC.GT         | 3 | 93796978  | 93796988  | 5.5     | .                  | .       | intergenic | .      | rs790502528   | 2 |
| AAATT.AATTT   | 3 | 93821052  | 93821068  | 3.4     | .                  | .       | intergenic | -0.092 | rs793434337   | 2 |
| AT.AT         | 3 | 94168685  | 94168701  | 8.5     | .                  | .       | intergenic | -0.118 | .             | 2 |
| AC.GT         | 3 | 94254656  | 94254667  | 6       | .                  | .       | intergenic | -0.031 | .             | 3 |
| AAAT.ATTT     | 3 | 94499870  | 94499885  | 4       | .                  | .       | intergenic | 0.04   | rs787542236   | 2 |
| AAAT.ATTT     | 3 | 94738822  | 94738844  | 5.75    | .                  | .       | intergenic | .      | rs789390028   | 2 |
| AAAC.GTTT     | 3 | 94821267  | 94821285  | 4.75    | .                  | .       | intergenic | 0.094  | rs788624615   | 2 |
| AAC.GTT       | 3 | 94850873  | 94850886  | 4.66667 | .                  | .       | intergenic | 0.012  | rs790005002   | 2 |
| AAAAC.GTTTT   | 3 | 94885149  | 94885182  | 6.8     | .                  | .       | intergenic | -0.008 | rs789599268   | 2 |
| AAAC.GTTT     | 3 | 94908378  | 94908405  | 7       | .                  | .       | intergenic | .      | 344109 rs7914 | 2 |
| AAT.ATT       | 3 | 95051133  | 95051149  | 5.66667 | .                  | .       | intergenic | -0.09  | rs792533571   | 2 |
| AC.GT         | 3 | 95062358  | 95062398  | 20.5    | .                  | .       | intergenic | 0.232  | rs789248421   | 4 |
| AATG.CATT     | 3 | 95870024  | 95870046  | 5.75    | .                  | .       | intergenic | 0.045  | rs789835797   | 2 |
| ATC.GAT       | 3 | 95935225  | 95935237  | 4.33333 | .                  | .       | intergenic | -0.047 | rs790287793   | 2 |
| AAAAC.GTTTT   | 3 | 95949724  | 95949745  | 4.4     | .                  | .       | intergenic | 0.061  | rs792066476   | 2 |
| AAAG.CTTT     | 3 | 96056440  | 96056459  | 5       | .                  | .       | intergenic | -0.083 | 138697 rs7885 | 2 |
| AC.GT         | 3 | 96061206  | 96061219  | 7       | .                  | .       | intergenic | -0.047 | rs792926568   | 3 |
| AAAAC.GTTTT   | 3 | 96236443  | 96236463  | 4.2     | .                  | .       | intergenic | .      | .             | 2 |
| AC.GT         | 3 | 96382811  | 96382821  | 5.5     | .                  | .       | intergenic | 0.148  | rs709029079   | 4 |
| AAAT.ATTT     | 3 | 96707470  | 96707495  | 6.5     | .                  | .       | intergenic | .      | 389858 rs7932 | 2 |
| AAAC.GTTT     | 3 | 96873280  | 96873299  | 5       | .                  | .       | intergenic | .      | 128124 rs7881 | 2 |
| AG.CT         | 3 | 97202655  | 97202671  | 8.5     | .                  | .       | intergenic | -0.102 | rs789506942   | 3 |
| AAAC.GTTT     | 3 | 97227298  | 97227314  | 4.25    | .                  | .       | intergenic | 0.036  | rs703902661   | 2 |
| AT.AT         | 3 | 97284859  | 97284868  | 5       | .                  | .       | intergenic | .      | rs792158256   | 2 |
| AT.AT         | 3 | 97380372  | 97380381  | 5       | .                  | .       | intergenic | -0.105 | rs787714148   | 3 |
| AAAC.GTTT     | 3 | 97392899  | 97392930  | 8       | .                  | .       | intergenic | .      | .             | 2 |
| AT.AT         | 3 | 97477799  | 97477808  | 5       | .                  | .       | intergenic | -0.627 | rs788961049   | 2 |
| AC.GT         | 3 | 97539645  | 97539655  | 5.5     | ENSSSCT00000024756 | FSHR    | intron     | 0.052  | rs789055584   | 2 |
| AAAC.GTTT     | 3 | 97595684  | 97595702  | 4.75    | .                  | .       | intergenic | -0.108 | rs789684427   | 2 |
| AAC.GTT       | 3 | 97608006  | 97608025  | 6.66667 | .                  | .       | intergenic | 0.201  | rs793335022   | 2 |
| AC.GT         | 3 | 97616356  | 97616367  | 6       | .                  | .       | intergenic | -0.049 | rs786243770   | 2 |
| AAAT.ATTT     | 3 | 97918517  | 97918545  | 7.25    | .                  | .       | intergenic | 0.051  | rs786685108   | 2 |
| AAAG.CTTT     | 3 | 98033243  | 98033265  | 5.75    | ENSSSCT00000009224 | PPP1R21 | intron     | 0.179  | rs790053748   | 2 |
| AC.GT         | 3 | 98141031  | 98141043  | 6.5     | ENSSSCT00000025707 | FOXN2   | intron     | 0.825  | 368251 rs7868 | 2 |
| AAAG.CTTT     | 3 | 98473106  | 98473117  | 3       | .                  | .       | intergenic | -0.024 | rs793586692   | 2 |
| AAC.GTT       | 3 | 98509532  | 98509545  | 4.66667 | .                  | .       | intergenic | 0.149  | rs692834837   | 2 |
| AAAC.GTTT     | 3 | 98788793  | 98788816  | 6       | .                  | .       | intergenic | .      | rs790207494   | 2 |
| AAAAAT.CTTTTT | 3 | 98802086  | 98802108  | 3.83333 | .                  | .       | intergenic | .      | .             | 2 |
| ACTG.CAGT     | 3 | 98825336  | 98825355  | 5       | .                  | .       | intergenic | 0.05   | .             | 2 |
| AAAG.CTTT     | 3 | 99290273  | 99290287  | 3.75    | ENSSSCT00000009229 | .       | intron     | .      | rs791910003   | 2 |
| AG.CT         | 3 | 99422179  | 99422191  | 6.5     | .                  | .       | intergenic | 0      | 387720 rs7878 | 2 |
| AAAC.GTTT     | 3 | 99486070  | 99486089  | 5       | .                  | .       | intergenic | 0.047  | rs790468781   | 2 |
| AAAC.GTTT     | 3 | 99738233  | 99738247  | 3.75    | .                  | .       | intergenic | 0.027  | rs788387164   | 2 |
| AATG.CATT     | 3 | 99869497  | 99869517  | 5.25    | .                  | .       | intergenic | 0.484  | rs788166857   | 2 |
| AT.AT         | 3 | 99984366  | 99984376  | 5.5     | .                  | .       | intergenic | 0.03   | rs786669131   | 2 |
| AAAT.ATTT     | 3 | 100029898 | 100029918 | 5.25    | .                  | .       | intergenic | 0.055  | rs790949526   | 2 |
| AAAAC.GTTTT   | 3 | 100076823 | 100076846 | 4.8     | ENSSSCT00000009240 | RHOQ    | intron     | -0.065 | rs789807451   | 2 |
| AC.GT         | 3 | 100189729 | 100189747 | 9.5     | ENSSSCT00000009245 | EPAS1   | intron     | 0.335  | .             | 2 |
| AAAAG.CTTTT   | 3 | 100363722 | 100363744 | 4.6     | .                  | .       | intergenic | 0.302  | .             | 2 |
| AGC.GCT       | 3 | 100481749 | 100481764 | 5.33333 | ENSSSCT00000009246 | PRKCE   | intron     | 0.245  | rs790495579   | 2 |
| AAT.ATT       | 3 | 100691855 | 100691869 | 5       | .                  | .       | intergenic | 0.056  | .             | 2 |
| AC.GT         | 3 | 100775687 | 100775697 | 5.5     | .                  | .       | intergenic | 0.119  | .             | 2 |
| AATC.GATT     | 3 | 100901653 | 100901686 | 8.5     | .                  | .       | intergenic | 0.06   | rs789667161   | 2 |
| AAAC.GTTT     | 3 | 101066847 | 101066863 | 4.25    | ENSSSCT00000009247 | SRBD1   | intron     | 0.188  | rs789899037   | 2 |
| AAAT.ATTT     | 3 | 101200450 | 101200468 | 4.75    | ENSSSCT00000009247 | SRBD1   | intron     | 0.25   | rs793445862   | 2 |
| AAAAG.CTTTT   | 3 | 101736530 | 101736557 | 5.6     | .                  | .       | intergenic | .      | rs789132833   | 2 |
| AT.AT         | 3 | 102209333 | 102209344 | 6       | .                  | .       | intergenic | 0.175  | 359880 rs7888 | 2 |
| AAC.GTT       | 3 | 102249691 | 102249708 | 6       | ENSSSCT00000009249 | .       | promoter   | 0.233  | rs789002244   | 2 |
| AAC.GTT       | 3 | 102249691 | 102249708 | 6       | ENSSSCT00000009250 | PREPL   | promoter   | 0.233  | rs789002244   | 2 |
| AAAT.ATTT     | 3 | 102289615 | 102289650 | 9       | ENSSSCT00000009250 | PREPL   | intron     | .      | 325016 rs7870 | 2 |
| AAAAC.GTTTT   | 3 | 102337096 | 102337127 | 6.4     | ENSSSCT00000009251 | .       | intron     | -0.109 | 727639 rs7915 | 2 |
| AACTC.GAGTT   | 3 | 102386564 | 102386587 | 4       | .                  | .       | intergenic | 0.099  | rs791568739   | 2 |
| AAAAC.GTTTT   | 3 | 102480066 | 102480083 | 3.6     | .                  | .       | intergenic | 0.483  | rs790396945   | 2 |
| AAC.GTT       | 3 | 102552237 | 102552251 | 5       | .                  | .       | intergenic | 0.135  | 362562 rs7920 | 2 |
| ATC.GAT       | 3 | 103076951 | 103076968 | 6       | ENSSSCT00000032410 | .       | intron     | 0.53   | 207850 rs7913 | 2 |
| AATG.CATT     | 3 | 103406215 | 103406236 | 5.5     | .                  | .       | intergenic | 0.049  | .             | 2 |
| AG.CT         | 3 | 103493723 | 103493732 | 5       | .                  | .       | intergenic | 0.166  | rs788688462   | 2 |
| AACT.AGTT     | 3 | 103511676 | 103511698 | 5.75    | .                  | .       | intergenic | -0.13  | 317665 rs7934 | 2 |
| AAAC.GTTT     | 3 | 103869609 | 103869627 | 4.75    | .                  | .       | intergenic | -0.032 | rs790908674   | 2 |
| AAAC.GTTT     | 3 | 104245736 | 104245758 | 5.75    | .                  | .       | intergenic | 0.102  | rs789695645   | 2 |
| AT.AT         | 3 | 104294739 | 104294750 | 6       | .                  | .       | intergenic | .      | .             | 4 |
| AAAAT.ATTTT   | 3 | 104472558 | 104472575 | 3.6     | .                  | .       | intergenic | .      | 364579 rs7909 | 2 |
| AAAC.GTTT     | 3 | 104568463 | 104568486 | 6       | .                  | .       | intergenic | 0.016  | rs789355509   | 2 |
| AAAC.GTTT     | 3 | 104866090 | 104866108 | 4.75    | .                  | .       | intergenic | 0.153  | 703802 rs7895 | 2 |
| AC.GT         | 3 | 104908825 | 104908849 | 12.5    | .                  | .       | intergenic | 0.151  | rs793302767   | 4 |
| AT.AT         | 3 | 104941655 | 104941664 | 5       | .                  | .       | intergenic | 0.121  | .             | 3 |
| AC.GT         | 3 | 104990350 | 104990365 | 8       | .                  | .       | intergenic | .      | rs787511400   | 4 |
| AC.GT         | 3 | 105087291 | 105087301 | 5.5     | .                  | .       | intergenic | .      | rs788886211   | 3 |
| AAAC.GTTT     | 3 | 105193695 | 105193712 | 4.5     | .                  | .       | intergenic | .      | rs792704484   | 3 |

|             |   |           |           |         |                    |        |            |        |                  |   |
|-------------|---|-----------|-----------|---------|--------------------|--------|------------|--------|------------------|---|
| AAAT.ATTT   | 3 | 105411821 | 105411853 | 8.25    | .                  | .      | intergenic | -0.133 | rs792489256      | 2 |
| AAGC.GCTT   | 3 | 105530213 | 105530245 | 8.25    | .                  | .      | intergenic | 0      | rs792574275      | 2 |
| AAAT.ATTT   | 3 | 105788919 | 105788936 | 4.5     | .                  | .      | intergenic | -0.077 | rs788244502      | 3 |
| AAAC.GTTT   | 3 | 105856964 | 105856982 | 4.75    | .                  | .      | intergenic | -0.091 | rs791319280      | 2 |
| AC.GT       | 3 | 105864313 | 105864322 | 5       | .                  | .      | intergenic | .      | .                | 2 |
| AAAC.GTTT   | 3 | 105913340 | 105913366 | 6.75    | .                  | .      | intergenic | .      | rs787862840      | 2 |
| AAAC.GTTT   | 3 | 105973682 | 105973702 | 5.25    | .                  | .      | intergenic | 0.107  | rs789928947      | 2 |
| AC.GT       | 3 | 105990104 | 105990121 | 9       | .                  | .      | intergenic | 0.028  | rs728899 rs7936  | 3 |
| AC.GT       | 3 | 105992555 | 105992590 | 18      | .                  | .      | intergenic | -0.006 | .                | 2 |
| AAAC.GTTT   | 3 | 106316384 | 106316406 | 5.75    | .                  | .      | intergenic | 0.187  | .                | 2 |
| AAAAC.GTTTT | 3 | 106352575 | 106352597 | 4.6     | .                  | .      | intergenic | -0.088 | rs786643072      | 2 |
| AAAAT.ATTTT | 3 | 106358785 | 106358806 | 4.4     | .                  | .      | intergenic | 0.043  | rs791687705      | 2 |
| AAC.GTT     | 3 | 106511575 | 106511589 | 5       | .                  | .      | intergenic | .      | .                | 3 |
| AGAGC.GCTCT | 3 | 106524840 | 106524859 | 4       | .                  | .      | intergenic | -0.326 | rs789906711      | 2 |
| AC.GT       | 3 | 106528156 | 106528165 | 5       | .                  | .      | intergenic | .      | rs787039751      | 2 |
| AAAAC.GTTTT | 3 | 106574091 | 106574119 | 5.8     | .                  | .      | intergenic | .      | rs702072022      | 2 |
| AG.CT       | 3 | 106853830 | 106853839 | 5       | .                  | .      | intergenic | 0.038  | .                | 2 |
| AAAAC.GTTTT | 3 | 107087927 | 107087947 | 4.2     | ENSSSCT00000009277 | MAP4K3 | promoter   | 0.268  | rs788315107      | 2 |
| AAAG.CTTT   | 3 | 107095516 | 107095534 | 4.75    | ENSSSCT00000009277 | MAP4K3 | intron     | 0.272  | rs788109267      | 2 |
| AG.CT       | 3 | 107551491 | 107551500 | 5       | ENSSSCT00000009283 | .      | promoter   | 0.859  | rs790065722      | 2 |
| AAC.GTT     | 3 | 107739193 | 107739205 | 4.33333 | .                  | .      | intergenic | .      | rs792584983      | 2 |
| AAC.GTT     | 3 | 107834360 | 107834382 | 7.66667 | ENSSSCT00000009287 | .      | promoter   | .      | rs791912 rs7898  | 2 |
| ATAT.ATAT   | 3 | 107950288 | 107950321 | 8.5     | .                  | .      | intergenic | 0.161  | .                | 2 |
| AAGG.CCTT   | 3 | 108319107 | 108319137 | 7.75    | .                  | .      | intergenic | .      | .                | 2 |
| AAT.ATT     | 3 | 108363079 | 108363092 | 4.66667 | .                  | .      | intergenic | 0.029  | .                | 3 |
| AAAC.GTTT   | 3 | 108955258 | 108955282 | 6.25    | ENSSSCT00000023650 | .      | intron     | 0.002  | rs88866 rs7918   | 2 |
| AC.GT       | 3 | 109027289 | 109027298 | 5       | .                  | .      | intergenic | 0.262  | rs791273970      | 3 |
| AAAC.GTTT   | 3 | 109476738 | 109476756 | 4.75    | ENSSSCT00000009297 | PRKD3  | intron     | 0.263  | rs795575 rs7923  | 2 |
| AAAAT.ATTTT | 3 | 109926962 | 109926979 | 3.6     | ENSSSCT00000009301 | STRN   | intron     | 0.075  | rs787165808      | 2 |
| AAAG.CTTT   | 3 | 110179747 | 110179766 | 5       | .                  | .      | intergenic | 0.126  | rs763085 rs7929  | 2 |
| AT.AT       | 3 | 110667331 | 110667344 | 7       | .                  | .      | intergenic | 0.132  | rs703982573      | 3 |
| AAAC.GTTT   | 3 | 110825093 | 110825107 | 3.75    | .                  | .      | intergenic | 0.231  | rs307534 rs7877  | 2 |
| AAAAG.CTTTT | 3 | 110844568 | 110844585 | 3.6     | .                  | .      | intergenic | .      | rs792743928      | 2 |
| AAAAT.ATTTT | 3 | 111031908 | 111031922 | 3       | .                  | .      | intergenic | 0.476  | rs793192195      | 2 |
| AAT.ATT     | 3 | 111157469 | 111157480 | 4       | .                  | .      | intergenic | 0.103  | rs792663277      | 2 |
| AAC.GTT     | 3 | 111229064 | 111229077 | 4.66667 | .                  | .      | intergenic | 0.07   | rs789993675      | 2 |
| AAAC.GTTT   | 3 | 111369369 | 111369382 | 3.5     | .                  | .      | intergenic | -0.117 | rs792307199      | 2 |
| AT.AT       | 3 | 111497197 | 111497234 | 19      | .                  | .      | intergenic | 0.121  | rs7920239 rs7876 | 2 |
| AT.AT       | 3 | 111565594 | 111565607 | 7       | .                  | .      | intergenic | 0.059  | rs789837748      | 2 |
| AAC.GTT     | 3 | 111666144 | 111666160 | 5.66667 | .                  | .      | intergenic | 0.047  | rs744353 rs7934  | 2 |
| AAG.CTT     | 3 | 111680705 | 111680729 | 8.33333 | .                  | .      | intergenic | -0.006 | rs792552942      | 2 |
| AAC.GTT     | 3 | 111968292 | 111968304 | 4.33333 | .                  | .      | intergenic | 0.393  | rs790477926      | 2 |
| AG.CT       | 3 | 111989953 | 111989967 | 7.5     | .                  | .      | intergenic | 0.021  | rs786408214      | 2 |
| AAAT.ATTT   | 3 | 112005531 | 112005553 | 5.75    | .                  | .      | intergenic | 0.027  | .                | 2 |
| AAAC.GTTT   | 3 | 112024264 | 112024282 | 4.75    | .                  | .      | intergenic | -0.049 | rs792593944      | 2 |
| AT.AT       | 3 | 112144351 | 112144361 | 5.5     | .                  | .      | intergenic | 0.134  | rs792180771      | 2 |
| AAAAT.ATTTT | 3 | 112228843 | 112228865 | 4.6     | .                  | .      | intergenic | 0.102  | rs788206993      | 2 |
| AAAC.GTTT   | 3 | 112523914 | 112523928 | 3.75    | .                  | .      | intergenic | .      | rs723510 rs7911  | 2 |
| AT.AT       | 3 | 112550058 | 112550074 | 8.5     | .                  | .      | intergenic | 0.017  | rs787589739      | 3 |
| AG.CT       | 3 | 112713735 | 112713750 | 8       | .                  | .      | intergenic | .      | rs790549863      | 5 |
| AAAAC.GTTTT | 3 | 112920243 | 112920270 | 5.6     | .                  | .      | intergenic | 0.078  | rs713289 rs7893  | 2 |
| AT.AT       | 3 | 113170222 | 113170231 | 5       | .                  | .      | intergenic | .      | rs787135092      | 2 |
| AG.CT       | 3 | 113347669 | 113347681 | 6.5     | ENSSSCT00000009313 | LTBP1  | intron     | -0.125 | .                | 3 |
| AC.GT       | 3 | 113353630 | 113353643 | 7       | ENSSSCT00000009313 | LTBP1  | intron     | 0.508  | rs789834603      | 2 |
| AAG.CTT     | 3 | 113362239 | 113362255 | 5.66667 | ENSSSCT00000009313 | LTBP1  | intron     | 0.009  | rs333849 rs7875  | 2 |
| AAG.CTT     | 3 | 113719495 | 113719511 | 5.66667 | .                  | .      | intergenic | 0.001  | rs787910259      | 2 |
| AC.GT       | 3 | 113772474 | 113772489 | 8       | ENSSSCT00000023086 | .      | intron     | -0.01  | rs790622178      | 2 |
| AAAT.ATTT   | 3 | 113934562 | 113934588 | 6.75    | ENSSSCT00000009315 | .      | intron     | 0.138  | rs790699632      | 2 |
| AAAG.CTTT   | 3 | 113967693 | 113967706 | 3.5     | ENSSSCT00000009316 | BIRC6  | intron     | 2.917  | rs789844429      | 2 |
| AAAG.CTTT   | 3 | 114326392 | 114326409 | 4.5     | ENSSSCT00000009319 | MEMO1  | intron     | 0.778  | rs790308698      | 2 |
| AAC.GTT     | 3 | 114395179 | 114395192 | 4.66667 | ENSSSCT00000009319 | MEMO1  | intron     | 0.275  | rs791115920      | 2 |
| AAAG.CTTT   | 3 | 114448985 | 114448997 | 3.25    | .                  | .      | intergenic | 0.211  | rs793763879      | 2 |
| AAAAT.ATTTT | 3 | 114554112 | 114554128 | 3.4     | .                  | .      | intergenic | .      | rs786495265      | 2 |
| ACAT.ATGT   | 3 | 114580897 | 114580915 | 4.75    | .                  | .      | intergenic | -0.07  | rs799827 rs7905  | 2 |
| AG.CT       | 3 | 114713275 | 114713288 | 7       | .                  | .      | intergenic | 0.095  | rs789128218      | 2 |
| AAT.ATT     | 3 | 114730996 | 114731007 | 4       | ENSSSCT00000009326 | XDH    | promoter   | -0.008 | rs789609981      | 2 |
| AATG.CATT   | 3 | 114778622 | 114778645 | 6       | ENSSSCT00000009326 | XDH    | intron     | .      | rs788772922      | 2 |
| AG.CT       | 3 | 114812835 | 114812851 | 8.5     | .                  | .      | intergenic | -0.14  | rs790327382      | 2 |
| AG.CT       | 3 | 114972396 | 114972410 | 7.5     | .                  | .      | intergenic | .      | .                | 3 |
| AG.CT       | 3 | 114982019 | 114982030 | 6       | .                  | .      | intergenic | 0.058  | .                | 2 |
| ACGC.GCGT   | 3 | 115856605 | 115856620 | 4       | .                  | .      | intergenic | -0.026 | rs797953 rs7924  | 2 |
| AG.CT       | 3 | 116344049 | 116344058 | 5       | .                  | .      | intergenic | 0.007  | rs339087 rs7876  | 3 |
| AAAC.GTTT   | 3 | 116398272 | 116398292 | 5.25    | ENSSSCT00000036644 | ALK    | intron     | -0.023 | rs793508544      | 2 |
| AAGG.CCTT   | 3 | 116413659 | 116413692 | 8.5     | .                  | .      | intergenic | .      | rs789254 rs7899  | 2 |
| AAAAC.GTTTT | 3 | 116507623 | 116507663 | 8.2     | .                  | .      | intergenic | -0.03  | rs789943936      | 2 |
| AAC.GTT     | 3 | 116536276 | 116536289 | 4.66667 | .                  | .      | intergenic | 0.204  | rs788274998      | 2 |
| AG.CT       | 3 | 116861255 | 116861269 | 7.5     | ENSSSCT00000033256 | ALK    | intron     | -0.017 | rs790144974      | 2 |
| AC.GT       | 3 | 117119513 | 117119525 | 6.5     | .                  | .      | intergenic | -0.051 | .                | 3 |
| AAAAC.GTTTT | 3 | 117195368 | 117195390 | 4.6     | .                  | .      | intergenic | 0.115  | rs793679517      | 2 |
| AAAC.GTTT   | 3 | 117601371 | 117601399 | 7.25    | .                  | .      | intergenic | .      | rs788740619      | 2 |
| AC.GT       | 3 | 117952380 | 117952401 | 11      | .                  | .      | intergenic | -0.2   | rs792763065      | 4 |
| ACG.CGT     | 3 | 118077532 | 118077545 | 4.66667 | ENSSSCT00000023126 | BRE    | intron     | 0.246  | rs789726253      | 2 |
| AC.GT       | 3 | 118131660 | 118131669 | 5       | .                  | .      | intergenic | 0.159  | .                | 2 |
| AGG.CCT     | 3 | 118461440 | 118461458 | 6.33333 | .                  | .      | intergenic | 0.678  | rs717846 rs7885  | 2 |



|             |   |           |           |         |                    |          |            |        |             |        |   |
|-------------|---|-----------|-----------|---------|--------------------|----------|------------|--------|-------------|--------|---|
| AC.GT       | 3 | 119188657 | 119188675 | 9.5     | ENSSSCT00000009365 | DPYSL5   | intron     | 0.207  | .           | .      | 4 |
| AATG.CATT   | 3 | 119472662 | 119472703 | 10.5    | ENSSSCT00000009371 | C2orf70  | intron     | -0.097 | 229262      | rs7885 | 3 |
| AAAC.GTTT   | 3 | 119508390 | 119508407 | 4.5     | .                  | .        | intergenic | 0.051  | rs790518947 | .      | 2 |
| AAAC.GTTT   | 3 | 119524595 | 119524609 | 3.75    | .                  | .        | intergenic | -0.016 | rs789521871 | .      | 2 |
| AAC.GTT     | 3 | 120083285 | 120083304 | 6.66667 | ENSSSCT00000009382 | ASXL2    | intron     | 0.159  | rs789547809 | .      | 2 |
| AC.GT       | 3 | 120133140 | 120133153 | 7       | ENSSSCT00000009382 | ASXL2    | intron     | .      | rs789944333 | .      | 2 |
| AG.CT       | 3 | 120165616 | 120165626 | 5.5     | ENSSSCT00000009382 | ASXL2    | intron     | 0.218  | 348950      | rs7901 | 2 |
| AC.GT       | 3 | 120261106 | 120261115 | 5       | ENSSSCT00000009384 | DTNB     | intron     | 0.208  | rs790822480 | .      | 6 |
| AAAC.GTTT   | 3 | 120837619 | 120837642 | 6       | ENSSSCT00000031886 | .        | intron     | .      | rs791129439 | .      | 2 |
| AT.AT       | 3 | 121038000 | 121038018 | 9.5     | ENSSSCT00000009386 | DNAJC27  | intron     | 1.097  | rs790616895 | .      | 3 |
| AT.AT       | 3 | 121134303 | 121134318 | 8       | ENSSSCT00000009387 | ADCY3    | intron     | .      | rs790773869 | .      | 4 |
| AAC.GTT     | 3 | 121387560 | 121387585 | 8.66667 | .                  | .        | intergenic | 0.252  | 356908      | rs7930 | 2 |
| AAC.GTT     | 3 | 121533145 | 121533159 | 5       | .                  | .        | intergenic | 0.163  | rs787658730 | .      | 2 |
| AG.CT       | 3 | 121785949 | 121785963 | 7.5     | ENSSSCT00000009392 | FAM228A  | intron     | .      | .           | .      | 2 |
| AAAAC.GTTTT | 3 | 121872592 | 121872613 | 4.4     | ENSSSCT00000009397 | .        | intron     | 0.194  | .           | .      | 2 |
| AC.GT       | 3 | 121901728 | 121901743 | 8       | ENSSSCT00000009399 | C2orf44  | intron     | 0.202  | 256014      | rs7873 | 4 |
| AC.GT       | 3 | 121965790 | 121965802 | 6.5     | .                  | .        | intergenic | .      | .           | .      | 4 |
| AG.CT       | 3 | 122031644 | 122031658 | 7.5     | ENSSSCT00000009401 | .        | intron     | -0.261 | rs792053086 | .      | 4 |
| AT.AT       | 3 | 122047557 | 122047567 | 5.5     | .                  | .        | intergenic | 0.218  | rs787552140 | .      | 2 |
| AAACC.GGTTT | 3 | 122318227 | 122318249 | 4.6     | .                  | .        | intergenic | 0.051  | 330633      | rs7913 | 3 |
| AG.CT       | 3 | 122438123 | 122438135 | 6.5     | .                  | .        | intergenic | 0.912  | rs786541883 | .      | 2 |
| ACAT.ATGT   | 3 | 122699663 | 122699698 | 9       | .                  | .        | intergenic | 0.065  | rs790388440 | .      | 2 |
| AAC.GTT     | 3 | 122751933 | 122751958 | 8.66667 | .                  | .        | intergenic | 0.078  | rs787861805 | .      | 2 |
| AT.AT       | 3 | 122873130 | 122873143 | 7       | .                  | .        | intergenic | 0.462  | rs787084816 | .      | 2 |
| AAG.CTT     | 3 | 122926658 | 122926679 | 7.33333 | .                  | .        | intergenic | 0.078  | .           | .      | 2 |
| ACAG.CTGT   | 3 | 123121193 | 123121215 | 5.75    | .                  | .        | intergenic | .      | 167893      | rs7900 | 2 |
| AAAC.GTTT   | 3 | 123300628 | 123300642 | 3.75    | .                  | .        | intergenic | 0.051  | rs789029189 | .      | 2 |
| AC.GT       | 3 | 123757249 | 123757259 | 5.5     | .                  | .        | intergenic | 0.04   | rs793642645 | .      | 2 |
| AAAT.ATTT   | 3 | 123758705 | 123758718 | 3.5     | .                  | .        | intergenic | 0.243  | rs788357131 | .      | 2 |
| AG.CT       | 3 | 123778460 | 123778469 | 5       | .                  | .        | intergenic | -0.17  | .           | .      | 2 |
| AC.GT       | 3 | 124019262 | 124019274 | 6.5     | .                  | .        | intergenic | .      | rs789944526 | .      | 2 |
| AG.CT       | 3 | 124076413 | 124076422 | 5       | .                  | .        | intergenic | -0.192 | 345479      | rs7937 | 2 |
| AAT.ATT     | 3 | 124127943 | 124127954 | 4       | .                  | .        | intergenic | 0.064  | .           | .      | 2 |
| AAT.ATT     | 3 | 124189769 | 124189785 | 5.66667 | .                  | .        | intergenic | .      | .           | .      | 2 |
| AT.AT       | 3 | 124245076 | 124245091 | 8       | .                  | .        | intergenic | .      | .           | .      | 2 |
| AG.CT       | 3 | 124370867 | 124370878 | 6       | .                  | .        | intergenic | -0.019 | .           | .      | 2 |
| AC.GT       | 3 | 124648011 | 124648022 | 6       | .                  | .        | intergenic | .      | rs791596732 | .      | 2 |
| AAC.GTT     | 3 | 124761245 | 124761256 | 4       | .                  | .        | intergenic | 0.268  | rs792264894 | .      | 2 |
| AAT.ATT     | 3 | 124876024 | 124876037 | 4.66667 | .                  | .        | intergenic | .      | rs786733326 | .      | 5 |
| AACCC.GGGTT | 3 | 125263024 | 125263040 | 3.4     | .                  | .        | intergenic | .      | rs787373171 | .      | 2 |
| AAAC.GTTT   | 3 | 125332387 | 125332401 | 3.75    | .                  | .        | intergenic | .      | .           | .      | 2 |
| AAAC.GTTT   | 3 | 125447926 | 125447944 | 4.75    | ENSSSCT00000025009 | C2orf43  | intron     | .      | rs788632839 | .      | 2 |
| AAAC.GTTT   | 3 | 125447926 | 125447944 | 4.75    | ENSSSCT00000023215 | C2orf43  | intron     | .      | rs788632839 | .      | 2 |
| AT.AT       | 3 | 125462389 | 125462399 | 5.5     | ENSSSCT00000023215 | C2orf43  | intron     | 0.271  | 107566      | rs7912 | 3 |
| AT.AT       | 3 | 125462389 | 125462399 | 5.5     | ENSSSCT00000025009 | C2orf43  | intron     | 0.271  | 107566      | rs7912 | 3 |
| AT.AT       | 3 | 125656268 | 125656278 | 5.5     | .                  | .        | intergenic | 0.276  | rs792382431 | .      | 3 |
| AC.GT       | 3 | 125744563 | 125744577 | 7.5     | .                  | .        | intergenic | 0.078  | rs787649374 | .      | 3 |
| AG.CT       | 3 | 125812973 | 125812985 | 6.5     | .                  | .        | intergenic | .      | rs786508856 | .      | 2 |
| AAT.ATT     | 3 | 126107665 | 126107680 | 5.33333 | .                  | .        | intergenic | -0.147 | rs790888831 | .      | 2 |
| AC.GT       | 3 | 126278559 | 126278575 | 8.5     | ENSSSCT00000009415 | WDR35    | intron     | .      | .           | .      | 2 |
| AC.GT       | 3 | 126278559 | 126278575 | 8.5     | ENSSSCT00000031965 | WDR35    | intron     | .      | .           | .      | 2 |
| AAC.GTT     | 3 | 126281801 | 126281816 | 5.33333 | ENSSSCT00000009415 | WDR35    | intron     | .      | rs793101570 | .      | 2 |
| AAC.GTT     | 3 | 126281801 | 126281816 | 5.33333 | ENSSSCT00000031965 | WDR35    | intron     | .      | rs793101570 | .      | 2 |
| AAAT.ATTT   | 3 | 126436786 | 126436806 | 5.25    | .                  | .        | intergenic | 0.061  | rs793381164 | .      | 2 |
| AC.GT       | 3 | 126560242 | 126560256 | 7.5     | .                  | .        | intergenic | .      | .           | .      | 4 |
| AC.GT       | 3 | 126588273 | 126588297 | 12.5    | .                  | .        | intergenic | 1.714  | .           | .      | 2 |
| AAAC.GTTT   | 3 | 126751910 | 126751930 | 5.25    | .                  | .        | intergenic | 0.043  | rs787295211 | .      | 3 |
| AAAC.GTTT   | 3 | 126784091 | 126784105 | 3.75    | .                  | .        | intergenic | -0.111 | rs791047494 | .      | 2 |
| AG.CT       | 3 | 126785713 | 126785742 | 15      | .                  | .        | intergenic | 0.133  | rs790664457 | .      | 2 |
| AAAT.ATTT   | 3 | 126861055 | 126861082 | 7       | .                  | .        | intergenic | .      | rs793139242 | .      | 2 |
| AAT.ATT     | 3 | 126944132 | 126944155 | 8       | .                  | .        | intergenic | -0.04  | .           | .      | 4 |
| AT.AT       | 3 | 127052509 | 127052518 | 5       | .                  | .        | intergenic | -0.087 | .           | .      | 2 |
| AC.GT       | 3 | 127080472 | 127080482 | 5.5     | .                  | .        | intergenic | -0.187 | rs791624296 | .      | 2 |
| AAAAC.GTTTT | 3 | 127186856 | 127186876 | 4.2     | .                  | .        | intergenic | -0.264 | rs789191765 | .      | 2 |
| AT.AT       | 3 | 127190487 | 127190496 | 5       | .                  | .        | intergenic | 0.122  | rs788043692 | .      | 2 |
| AGAT.ATCT   | 3 | 127226787 | 127226814 | 7       | .                  | .        | intergenic | -0.035 | rs790031624 | .      | 2 |
| ATCC.GGAT   | 3 | 127226911 | 127226925 | 3.75    | .                  | .        | intergenic | 0.054  | rs787365795 | .      | 2 |
| AAAG.CTTT   | 3 | 127232019 | 127232032 | 3.5     | .                  | .        | intergenic | 0.056  | 246655      | rs7897 | 2 |
| AAAC.GTTT   | 3 | 127310051 | 127310075 | 6.25    | .                  | .        | intergenic | -0.047 | rs788953389 | .      | 2 |
| AT.AT       | 3 | 127715759 | 127715768 | 5       | .                  | .        | intergenic | .      | rs788954530 | .      | 2 |
| AAAAC.GTTTT | 3 | 127740983 | 127741005 | 4.6     | .                  | .        | intergenic | .      | rs792538814 | .      | 2 |
| AAAC.GTTT   | 3 | 127817520 | 127817550 | 7.75    | .                  | .        | intergenic | .      | rs787100207 | .      | 2 |
| AT.AT       | 3 | 128211693 | 128211710 | 9       | .                  | .        | intergenic | .      | rs793669856 | .      | 4 |
| AAAC.GTTT   | 3 | 128268786 | 128268800 | 3.75    | ENSSSCT00000009425 | SMC6     | intron     | 1.117  | rs786957286 | .      | 2 |
| AC.GT       | 3 | 128319815 | 128319829 | 7.5     | .                  | .        | intergenic | 0.117  | .           | .      | 2 |
| AAACC.GGTTT | 3 | 128439038 | 128439058 | 3.5     | .                  | .        | intergenic | -0.106 | .           | .      | 2 |
| AG.CT       | 3 | 128472156 | 128472173 | 9       | ENSSSCT00000024717 | RAD51AP2 | intron     | 0.141  | 355842      | rs7886 | 2 |
| AT.AT       | 3 | 128561180 | 128561189 | 5       | .                  | .        | intergenic | .      | rs789162099 | .      | 2 |
| AG.CT       | 3 | 128633208 | 128633219 | 6       | .                  | .        | intergenic | 0.375  | rs787215421 | .      | 3 |
| AAAC.GTTT   | 3 | 128961407 | 128961425 | 4.75    | .                  | .        | intergenic | -0.277 | rs792732448 | .      | 2 |
| AC.GT       | 3 | 129007138 | 129007149 | 6       | .                  | .        | intergenic | -0.055 | rs709790272 | .      | 2 |
| AAAAT.ATTTT | 3 | 129037124 | 129037158 | 7       | .                  | .        | intergenic | 0.229  | rs792531755 | .      | 2 |
| AAAAC.GTTTT | 3 | 129208988 | 129209006 | 3.8     | .                  | .        | intergenic | 0.044  | rs789206430 | .      | 2 |
| AAAAC.GTTTT | 3 | 129292867 | 129292891 | 4.16667 | ENSSSCT00000009428 | FAM49A   | intron     | -0.161 | 267447      | rs7885 | 2 |

|              |   |           |           |         |                    |         |            |        |                 |   |
|--------------|---|-----------|-----------|---------|--------------------|---------|------------|--------|-----------------|---|
| AC.GT        | 3 | 129372691 | 129372703 | 6.5     | .                  | .       | intergenic | -0.086 | rs791214230     | 2 |
| AC.GT        | 3 | 129430504 | 129430518 | 7.5     | .                  | .       | intergenic | -0.142 | rs789337606     | 2 |
| ACTC.GAGT    | 3 | 129619945 | 129619965 | 5.25    | .                  | .       | intergenic | -0.241 | rs78398 rs7933  | 2 |
| AAAT.ATTT    | 3 | 129948506 | 129948524 | 4.75    | .                  | .       | intergenic | -0.087 | rs792856937     | 2 |
| AAAC.GTTT    | 3 | 130026412 | 130026430 | 4.75    | .                  | .       | intergenic | 0.087  | rs29117 rs7914  | 2 |
| AATG.CATT    | 3 | 130067626 | 130067655 | 7.5     | .                  | .       | intergenic | -0.338 | rs792027126     | 3 |
| AAAAT.ATTTT  | 3 | 130122335 | 130122354 | 4       | .                  | .       | intergenic | -0.29  | rs296634 rs7893 | 2 |
| AAATG.CATTT  | 3 | 130627568 | 130627588 | 3.5     | ENSSSCT0000009431  | .       | intron     | 0.437  | rs540320 rs7874 | 2 |
| AAAAAG.CTTTT | 3 | 131204417 | 131204439 | 3.83333 | .                  | .       | intergenic | .      | rs787371550     | 2 |
| AATC.GATT    | 3 | 131333359 | 131333385 | 6.75    | .                  | .       | intergenic | -0.01  | rs788599680     | 2 |
| AAT.ATT      | 3 | 131337772 | 131337783 | 4       | .                  | .       | intergenic | .      | rs786322765     | 2 |
| AT.AT        | 3 | 131351645 | 131351656 | 6       | .                  | .       | intergenic | 0.212  | rs793272376     | 2 |
| AC.GT        | 3 | 131464896 | 131464906 | 5.5     | .                  | .       | intergenic | .      | .               | 3 |
| AT.AT        | 3 | 131763273 | 131763287 | 7.5     | .                  | .       | intergenic | -0.025 | rs788840906     | 2 |
| AT.AT        | 3 | 131822391 | 131822402 | 6       | .                  | .       | intergenic | -0.163 | rs789016264     | 2 |
| AAAC.GTTT    | 3 | 131838731 | 131838750 | 5       | .                  | .       | intergenic | .      | rs792408509     | 2 |
| AAAC.GTTT    | 3 | 131975669 | 131975691 | 5.75    | .                  | .       | intergenic | -0.09  | rs365019 rs7924 | 2 |
| AG.CT        | 3 | 132236959 | 132236982 | 12      | .                  | .       | intergenic | .      | .               | 4 |
| AC.GT        | 3 | 132279645 | 132279669 | 12.5    | .                  | .       | intergenic | .      | rs788854088     | 2 |
| AAAC.GTTT    | 3 | 132333631 | 132333655 | 6.25    | .                  | .       | intergenic | -0.123 | rs732352 rs7888 | 2 |
| AC.GT        | 3 | 132336638 | 132336650 | 6.5     | .                  | .       | intergenic | 0.13   | .               | 2 |
| AAAAC.GTTTT  | 3 | 132441791 | 132441814 | 4.8     | .                  | .       | intergenic | -0.416 | rs789871868     | 2 |
| AAC.GTT      | 3 | 132457949 | 132457965 | 5.66667 | .                  | .       | intergenic | -0.195 | rs180335 rs7924 | 2 |
| AT.AT        | 3 | 132524354 | 132524371 | 9       | .                  | .       | intergenic | 0.06   | rs789988741     | 2 |
| AT.AT        | 3 | 132730905 | 132730921 | 8.5     | .                  | .       | intergenic | .      | rs786593200     | 2 |
| AC.GT        | 3 | 132738006 | 132738033 | 14      | .                  | .       | intergenic | -0.058 | rs788781721     | 2 |
| AAG.CTT      | 3 | 132835008 | 132835021 | 4.66667 | .                  | .       | intergenic | -0.129 | .               | 2 |
| AC.GT        | 3 | 132845324 | 132845341 | 9       | .                  | .       | intergenic | -0.001 | rs151958 rs7926 | 3 |
| AAAT.ATTT    | 3 | 132865487 | 132865505 | 4.75    | .                  | .       | intergenic | .      | .               | 2 |
| AG.CT        | 3 | 132893408 | 132893424 | 8.5     | .                  | .       | intergenic | -0.145 | rs788400116     | 2 |
| AAAT.ATTT    | 3 | 132904048 | 132904061 | 3.5     | .                  | .       | intergenic | -0.248 | rs788879585     | 2 |
| AG.CT        | 3 | 133509451 | 133509463 | 6.5     | .                  | .       | intergenic | -0.169 | rs787663056     | 4 |
| ACC.GGT      | 3 | 133544992 | 133545005 | 4.66667 | .                  | .       | intergenic | -0.047 | .               | 2 |
| AAC.GTT      | 3 | 134252919 | 134252933 | 5       | ENSSSCT0000009440  | ROCK2   | intron     | 3.313  | rs793403816     | 2 |
| AAAC.GTTT    | 3 | 134607641 | 134607657 | 4.25    | .                  | .       | intergenic | .      | rs790213134     | 3 |
| AG.CT        | 3 | 134637254 | 134637270 | 8.5     | ENSSSCT0000009447  | NOL10   | intron     | 1.267  | rs787363649     | 2 |
| AC.GT        | 3 | 135499540 | 135499550 | 5.5     | .                  | .       | intergenic | -0.098 | .               | 2 |
| AC.GT        | 3 | 135676870 | 135676882 | 6.5     | ENSSSCT00000026647 | MBOAT2  | intron     | 0.082  | rs788289728     | 2 |
| AAAC.GTTT    | 3 | 136064437 | 136064460 | 6       | .                  | .       | intergenic | -0.02  | rs719610 rs7891 | 2 |
| AAAAC.GTTTT  | 3 | 136719095 | 136719118 | 4.8     | .                  | .       | intergenic | -0.105 | rs788816284     | 2 |
| AAAC.GTTT    | 3 | 136766002 | 136766018 | 4.25    | .                  | .       | intergenic | -0.366 | rs389492 rs7933 | 2 |
| AAAAC.GTTTT  | 3 | 137761441 | 137761459 | 3.8     | .                  | .       | intergenic | 0.159  | rs792594308     | 2 |
| AG.CT        | 3 | 138158994 | 138159003 | 5       | .                  | .       | intergenic | -0.37  | .               | 2 |
| AC.GT        | 3 | 138541310 | 138541320 | 5.5     | .                  | .       | intergenic | .      | rs273264 rs6996 | 4 |
| AAT.ATT      | 3 | 138760284 | 138760312 | 9.66667 | .                  | .       | intergenic | -0.172 | rs789077091     | 2 |
| AAAC.GTTT    | 3 | 138957218 | 138957237 | 5       | .                  | .       | intergenic | .      | rs793001339     | 2 |
| AT.AT        | 3 | 139002197 | 139002206 | 5       | .                  | .       | intergenic | .      | rs790582314     | 2 |
| AC.GT        | 3 | 139129714 | 139129724 | 5.5     | .                  | .       | intergenic | .      | rs793241759     | 2 |
| AACT.AGTT    | 3 | 139302652 | 139302673 | 5.5     | .                  | .       | intergenic | -0.098 | rs183905 rs7924 | 2 |
| AATG.CATT    | 3 | 139628663 | 139628686 | 6       | .                  | .       | intergenic | -0.237 | rs357544 rs7929 | 2 |
| AC.GT        | 3 | 139716374 | 139716390 | 8.5     | .                  | .       | intergenic | -0.471 | .               | 4 |
| AAT.ATT      | 3 | 140069320 | 140069334 | 5       | .                  | .       | intergenic | -0.124 | rs186471 rs7922 | 3 |
| AAGG.CCTT    | 3 | 140135343 | 140135365 | 5.75    | .                  | .       | intergenic | -0.223 | rs787667650     | 2 |
| AC.GT        | 3 | 140338928 | 140338937 | 5       | .                  | .       | intergenic | -0.3   | rs789614301     | 3 |
| AAAT.ATTT    | 3 | 140365107 | 140365127 | 5.25    | ENSSSCT0000009464  | DCDC2C  | intron     | 0.549  | rs128727 rs7893 | 2 |
| AAAAT.ATTTT  | 3 | 141048960 | 141048984 | 5       | .                  | .       | intergenic | -0.304 | rs741787 rs7877 | 2 |
| AAAAT.ATTTT  | 3 | 141116010 | 141116029 | 4       | .                  | .       | intergenic | 0.168  | rs136465 rs7876 | 2 |
| AAAT.ATTT    | 3 | 141226210 | 141226229 | 5       | .                  | .       | intergenic | -0.713 | rs790150722     | 4 |
| AC.GT        | 3 | 143735764 | 143735813 | 25      | .                  | .       | intergenic | 0.485  | .               | 5 |
| AAAC.GTTT    | 3 | 144162775 | 144162797 | 5.75    | .                  | .       | intergenic | .      | rs360756 rs7899 | 2 |
| AAAC.GTTT    | 4 | 1119405   | 1119426   | 5.5     | .                  | .       | intergenic | .      | rs786444172     | 2 |
| AAAC.GTTT    | 4 | 1791485   | 1791503   | 4.75    | .                  | .       | intergenic | -0.135 | rs787535543     | 2 |
| AG.CT        | 4 | 2381826   | 2381838   | 6.5     | ENSSSCT0000006516  | AGO2    | intron     | .      | rs364148 rs7913 | 2 |
| AT.AT        | 4 | 3035800   | 3035816   | 8.5     | .                  | .       | intergenic | 0.007  | rs352362 rs7936 | 4 |
| AC.GT        | 4 | 3433760   | 3433771   | 6       | .                  | .       | intergenic | .      | .               | 2 |
| AG.CT        | 4 | 4275361   | 4275379   | 9.5     | ENSSSCT00000034533 | FAM135B | intron     | -0.216 | rs702488221     | 2 |
| AG.CT        | 4 | 4275361   | 4275379   | 9.5     | ENSSSCT0000006522  | FAM135B | intron     | -0.216 | rs702488221     | 2 |
| AG.CT        | 4 | 4529041   | 4529053   | 6.5     | .                  | .       | intergenic | -0.282 | rs789481578     | 2 |
| ACACC.GGTGT  | 4 | 4588547   | 4588569   | 4.6     | .                  | .       | intergenic | -0.114 | rs346588 rs7901 | 2 |
| AT.AT        | 4 | 4685724   | 4685742   | 9.5     | .                  | .       | intergenic | -0.282 | rs787328281     | 2 |
| AG.CT        | 4 | 4709654   | 4709664   | 5.5     | .                  | .       | intergenic | -0.443 | rs786839524     | 2 |
| AG.CT        | 4 | 4803051   | 4803065   | 7.5     | .                  | .       | intergenic | -0.256 | rs787469393     | 3 |
| AAAGC.GCTTT  | 4 | 5018758   | 5018774   | 3.4     | .                  | .       | intergenic | -0.207 | .               | 2 |
| AC.GT        | 4 | 5061699   | 5061717   | 9.5     | .                  | .       | intergenic | -0.223 | rs789256918     | 3 |
| AAT.ATT      | 4 | 5255251   | 5255263   | 4.33333 | .                  | .       | intergenic | -0.084 | rs793032314     | 2 |
| AC.GT        | 4 | 5336241   | 5336256   | 8       | .                  | .       | intergenic | 0.133  | rs345528 rs7937 | 2 |
| AG.CT        | 4 | 5379583   | 5379602   | 10      | .                  | .       | intergenic | -0.208 | rs322220 rs7890 | 2 |
| AC.GT        | 4 | 5486359   | 5486371   | 6.5     | .                  | .       | intergenic | -0.203 | rs775467 rs7872 | 3 |
| AC.GT        | 4 | 5490762   | 5490774   | 6.5     | .                  | .       | intergenic | -0.062 | rs337345 rs7929 | 3 |
| AAAAAC.GTTTT | 4 | 5503508   | 5503529   | 3.66667 | .                  | .       | intergenic | -0.204 | rs790701871     | 2 |
| AT.AT        | 4 | 5511670   | 5511683   | 7       | .                  | .       | intergenic | -0.014 | rs378333 rs7929 | 2 |
| AAG.CTT      | 4 | 5648168   | 5648181   | 4.66667 | .                  | .       | intergenic | -0.328 | rs786969173     | 6 |
| AAT.ATT      | 4 | 5886377   | 5886392   | 5.33333 | .                  | .       | intergenic | -0.147 | rs791844345     | 2 |
| AC.GT        | 4 | 5905391   | 5905408   | 9       | .                  | .       | intergenic | -0.216 | rs787707652     | 4 |

|              |   |          |          |         |                    |           |            |        |             |   |
|--------------|---|----------|----------|---------|--------------------|-----------|------------|--------|-------------|---|
| AC.GT        | 4 | 5936063  | 5936081  | 9.5     | .                  | .         | intergenic | -0.633 | rs790595934 | 3 |
| AC.GT        | 4 | 6025135  | 6025145  | 5.5     | .                  | .         | intergenic | -0.192 | rs789333401 | 2 |
| AAAAAT.ATTTT | 4 | 6083094  | 6083113  | 3.33333 | .                  | .         | intergenic | 0.303  | rs787268321 | 2 |
| AAAC.GTTT    | 4 | 6180033  | 6180051  | 4.75    | ENSSSCT0000006524  | CU151851. | intron     | .      | rs793747849 | 2 |
| AAAC.GTTT    | 4 | 6180033  | 6180051  | 4.75    | ENSSSCT00000036563 | CU151851. | intron     | .      | rs793747849 | 2 |
| AAAC.GTTT    | 4 | 6180033  | 6180051  | 4.75    | ENSSSCT00000035168 | CU151851. | intron     | .      | rs793747849 | 2 |
| AC.GT        | 4 | 6242958  | 6242967  | 5       | .                  | .         | intergenic | -0.105 | .           | 2 |
| AAAC.GTTT    | 4 | 6324318  | 6324335  | 4.5     | .                  | .         | intergenic | 0.05   | rs792477147 | 2 |
| AC.GT        | 4 | 6561317  | 6561326  | 5       | .                  | .         | intergenic | 0.012  | rs788433497 | 2 |
| AC.GT        | 4 | 6948626  | 6948635  | 5       | ENSSSCT00000033897 | CU571095. | intron     | .      | .           | 2 |
| AC.GT        | 4 | 7077369  | 7077379  | 5.5     | .                  | .         | intergenic | 0.078  | .           | 4 |
| AATG.CATT    | 4 | 7081076  | 7081099  | 6       | .                  | .         | intergenic | 0.154  | rs7914      | 2 |
| AGCCC.GGGCT  | 4 | 7435013  | 7435027  | 3       | .                  | .         | intergenic | -0.137 | .           | 2 |
| AGATAT.ATATC | 4 | 7447065  | 7447095  | 5.16667 | .                  | .         | intergenic | -0.391 | rs793622545 | 2 |
| AG.CT        | 4 | 7492546  | 7492556  | 5.5     | .                  | .         | intergenic | -0.144 | rs7903      | 3 |
| AG.CT        | 4 | 7543767  | 7543784  | 9       | .                  | .         | intergenic | 0.055  | .           | 2 |
| AAC.GTT      | 4 | 7812501  | 7812514  | 4.66667 | .                  | .         | intergenic | -0.124 | rs789986688 | 2 |
| AAAC.GTTT    | 4 | 8440418  | 8440435  | 4.5     | ENSSSCT0000006533  | PHF20L1   | intron     | -0.044 | rs789081001 | 2 |
| AAAC.GTTT    | 4 | 8529005  | 8529029  | 6.25    | ENSSSCT0000006534  | .         | intron     | 0.028  | rs7892      | 2 |
| AAAT.ATTT    | 4 | 8630675  | 8630693  | 4.75    | ENSSSCT00000034663 | LRRC6     | intron     | -0.282 | rs793661939 | 2 |
| AAAT.ATTT    | 4 | 8630675  | 8630693  | 4.75    | ENSSSCT0000006535  | LRRC6     | intron     | -0.282 | rs793661939 | 2 |
| AAC.GTT      | 4 | 8727804  | 8727820  | 5.66667 | .                  | .         | intergenic | -0.194 | .           | 2 |
| AAAC.GTTT    | 4 | 8810103  | 8810122  | 5       | .                  | .         | intergenic | -0.183 | rs793300960 | 2 |
| ATCC.GGAT    | 4 | 8954675  | 8954696  | 5.5     | ENSSSCT00000029622 | .         | promoter   | -0.108 | rs789261847 | 2 |
| AC.GT        | 4 | 8959633  | 8959652  | 10      | .                  | .         | intergenic | -0.118 | rs786231170 | 3 |
| AGG.CCT      | 4 | 8995151  | 8995169  | 6.33333 | .                  | .         | intergenic | -0.267 | rs793454411 | 3 |
| AAC.GTT      | 4 | 9888015  | 9888036  | 7.33333 | .                  | .         | intergenic | -0.063 | rs793869607 | 2 |
| AAAAC.GTTTT  | 4 | 10687472 | 10687492 | 4.2     | .                  | .         | intergenic | -0.115 | .           | 2 |
| AATG.CATT    | 4 | 10711512 | 10711528 | 4.25    | .                  | .         | intergenic | -0.264 | rs787575676 | 2 |
| AAAC.GTTT    | 4 | 10770069 | 10770087 | 4.75    | .                  | .         | intergenic | .      | rs7887      | 2 |
| AAAAG.CTTTT  | 4 | 11079013 | 11079031 | 3.8     | .                  | .         | intergenic | -0.188 | rs793054851 | 2 |
| AAAC.GTTT    | 4 | 11094146 | 11094170 | 6.25    | ENSSSCT0000006545  | GSDMC     | promoter   | .      | rs7869      | 2 |
| AGGG.CCCT    | 4 | 11264438 | 11264450 | 3.25    | .                  | .         | intergenic | 0.023  | rs790569505 | 2 |
| AAAT.ATTT    | 4 | 11522729 | 11522750 | 5.5     | .                  | .         | intergenic | 0.021  | rs788927901 | 2 |
| AAC.GTT      | 4 | 11535903 | 11535918 | 5.33333 | .                  | .         | intergenic | 0.172  | rs790709093 | 2 |
| ACAT.ATGT    | 4 | 11755897 | 11755916 | 5       | .                  | .         | intergenic | -0.255 | rs787109231 | 2 |
| ACAT.ATGT    | 4 | 11819320 | 11819334 | 3.75    | .                  | .         | intergenic | -0.327 | rs7930      | 2 |
| AT.AT        | 4 | 12073352 | 12073364 | 6.5     | .                  | .         | intergenic | 0.037  | rs789883185 | 3 |
| AG.CT        | 4 | 12115242 | 12115251 | 5       | .                  | .         | intergenic | -0.151 | .           | 2 |
| AAC.GTT      | 4 | 12179984 | 12179996 | 4.33333 | .                  | .         | intergenic | -0.117 | rs789006013 | 2 |
| AG.CT        | 4 | 12289638 | 12289647 | 5       | .                  | .         | intergenic | -0.134 | rs7881      | 2 |
| AC.GT        | 4 | 12378700 | 12378709 | 5       | .                  | .         | intergenic | -0.086 | .           | 2 |
| AAT.ATT      | 4 | 12682848 | 12682866 | 6.33333 | .                  | .         | intergenic | -0.226 | rs788653145 | 2 |
| AAAC.GTTT    | 4 | 12743437 | 12743451 | 3.75    | .                  | .         | intergenic | .      | rs786543882 | 2 |
| AAAT.ATTT    | 4 | 12809545 | 12809567 | 5.75    | .                  | .         | intergenic | -0.175 | rs792108620 | 2 |
| ATC.GAT      | 4 | 12820506 | 12820520 | 5       | .                  | .         | intergenic | -0.28  | rs790089840 | 2 |
| AT.AT        | 4 | 12854629 | 12854646 | 9       | .                  | .         | intergenic | -0.155 | rs7933      | 2 |
| AC.GT        | 4 | 13228469 | 13228480 | 6       | .                  | .         | intergenic | 0.133  | rs7905      | 4 |
| AAAAAT.ATTTT | 4 | 13240829 | 13240851 | 3.83333 | .                  | .         | intergenic | 0.053  | rs792057455 | 2 |
| AT.AT        | 4 | 13391073 | 13391090 | 9       | .                  | .         | intergenic | -0.19  | rs787165400 | 3 |
| AG.CT        | 4 | 13392147 | 13392158 | 6       | .                  | .         | intergenic | 1.215  | .           | 3 |
| AAAC.GTTT    | 4 | 13430292 | 13430315 | 6       | .                  | .         | intergenic | -0.11  | rs792824417 | 2 |
| AC.GT        | 4 | 13558562 | 13558576 | 7.5     | .                  | .         | intergenic | -0.037 | rs787019350 | 2 |
| AAAC.GTTT    | 4 | 13565672 | 13565699 | 7       | .                  | .         | intergenic | .      | rs7901      | 2 |
| AAAC.GTTT    | 4 | 13645065 | 13645084 | 5       | .                  | .         | intergenic | 0.203  | rs789778945 | 2 |
| AAGAG.CTCTT  | 4 | 14443727 | 14443743 | 3.4     | .                  | .         | intergenic | 0.495  | rs792049048 | 2 |
| AAAAAC.GTTTT | 4 | 14612991 | 14613015 | 4.16667 | .                  | .         | intergenic | 0.444  | rs7889      | 2 |
| AAAC.GTTT    | 4 | 14692772 | 14692803 | 8       | .                  | .         | intergenic | -0.145 | rs7882      | 2 |
| AAAT.ATTT    | 4 | 14827673 | 14827689 | 4.25    | .                  | .         | intergenic | -0.203 | rs793855200 | 2 |
| AAAT.ATTT    | 4 | 15101766 | 15101786 | 5.25    | .                  | .         | intergenic | 0.11   | rs788516833 | 2 |
| AC.GT        | 4 | 15186550 | 15186560 | 5.5     | ENSSSCT0000006552  | KIAA0196  | intron     | 0.095  | .           | 2 |
| AC.GT        | 4 | 15186550 | 15186560 | 5.5     | ENSSSCT00000026728 | .         | promoter   | 0.095  | .           | 2 |
| AT.AT        | 4 | 15218845 | 15218877 | 16.5    | ENSSSCT00000034190 | KIAA0196  | intron     | -0.207 | rs7895      | 2 |
| AT.AT        | 4 | 15218845 | 15218877 | 16.5    | ENSSSCT0000006552  | KIAA0196  | intron     | -0.207 | rs7895      | 2 |
| AAAAT.ATTTT  | 4 | 15284545 | 15284564 | 4       | .                  | .         | intergenic | 0.174  | rs786493486 | 2 |
| AAAAT.ATTTT  | 4 | 15913328 | 15913357 | 6       | ENSSSCT0000006560  | TMEM65    | intron     | .      | rs790671232 | 2 |
| AAAAC.GTTTT  | 4 | 15949757 | 15949784 | 5.6     | .                  | .         | intergenic | -0.059 | rs790348430 | 2 |
| AC.GT        | 4 | 16162979 | 16163000 | 11      | .                  | .         | intergenic | 0.125  | rs709860514 | 4 |
| AAAC.GTTT    | 4 | 16335622 | 16335635 | 3.5     | .                  | .         | intergenic | -0.18  | rs788673593 | 2 |
| AC.GT        | 4 | 16383655 | 16383666 | 6       | ENSSSCT00000027516 | FAM91A1   | intron     | 1.081  | rs789870026 | 2 |
| AGAT.ATCT    | 4 | 16441962 | 16441982 | 5.25    | .                  | .         | intergenic | 0.004  | rs787170842 | 2 |
| AAAAT.ATTTT  | 4 | 16701839 | 16701863 | 5       | .                  | .         | intergenic | .      | rs7884      | 2 |
| ACC.GGT      | 4 | 16716370 | 16716383 | 4.66667 | .                  | .         | intergenic | -0.038 | rs790856571 | 4 |
| AT.AT        | 4 | 16775843 | 16775868 | 13      | ENSSSCT0000006566  | ATAD2     | intron     | 0.264  | rs792103838 | 4 |
| AATC.GATT    | 4 | 16790277 | 16790298 | 5.5     | ENSSSCT0000006566  | ATAD2     | intron     | .      | rs793876993 | 2 |
| AAAAC.GTTTT  | 4 | 16807317 | 16807336 | 4       | ENSSSCT0000006566  | ATAD2     | intron     | .      | rs7909      | 2 |
| AC.GT        | 4 | 16898815 | 16898827 | 6.5     | ENSSSCT00000024326 | .         | intron     | .      | rs694051292 | 3 |
| AAC.GTT      | 4 | 17139111 | 17139127 | 5.66667 | .                  | .         | intergenic | .      | rs790332987 | 2 |
| AT.AT        | 4 | 17184361 | 17184370 | 5       | .                  | .         | intergenic | .      | .           | 2 |
| AGGG.CCCT    | 4 | 17291439 | 17291450 | 3       | .                  | .         | intergenic | -0.289 | .           | 2 |
| AC.GT        | 4 | 17305911 | 17305925 | 7.5     | .                  | .         | intergenic | -0.09  | rs791887360 | 2 |
| AC.GT        | 4 | 17524880 | 17524894 | 7.5     | .                  | .         | intergenic | 0.125  | rs699721282 | 2 |
| AGG.CCT      | 4 | 17661863 | 17661875 | 4.33333 | .                  | .         | intergenic | 0.039  | rs792035373 | 2 |
| AC.GT        | 4 | 17686018 | 17686046 | 14.5    | .                  | .         | intergenic | 0.207  | .           | 2 |

|             |   |          |          |         |                    |         |            |        |             |        |   |
|-------------|---|----------|----------|---------|--------------------|---------|------------|--------|-------------|--------|---|
| AAAC.GTTT   | 4 | 17935971 | 17935988 | 4.5     | .                  | .       | intergenic | .      | rs49050     | rs7014 | 4 |
| AG.CT       | 4 | 17994958 | 17994989 | 16      | .                  | .       | intergenic | -0.215 | .           | .      | 4 |
| AG.CT       | 4 | 18137054 | 18137069 | 8       | .                  | .       | intergenic | -0.022 | rs786517363 | .      | 2 |
| AAAC.GTTT   | 4 | 18236573 | 18236598 | 6.5     | .                  | .       | intergenic | .      | .           | .      | 2 |
| AG.CT       | 4 | 18261618 | 18261632 | 7.5     | .                  | .       | intergenic | 0.226  | .           | .      | 3 |
| AAT.ATT     | 4 | 18534144 | 18534158 | 5       | .                  | .       | intergenic | 0.379  | rs789145513 | .      | 2 |
| AAAT.ATTT   | 4 | 18546564 | 18546586 | 5.75    | .                  | .       | intergenic | 0.049  | rs381433    | rs7911 | 2 |
| AC.GT       | 4 | 18749306 | 18749327 | 11      | .                  | .       | intergenic | 0.134  | rs788789661 | .      | 4 |
| AGC.GCT     | 4 | 18803246 | 18803258 | 4.33333 | .                  | .       | intergenic | -0.173 | rs788925205 | .      | 2 |
| AAG.CTT     | 4 | 18807366 | 18807390 | 8.33333 | .                  | .       | intergenic | -0.271 | rs787367049 | .      | 2 |
| AG.CT       | 4 | 19011423 | 19011436 | 7       | .                  | .       | intergenic | 0.163  | .           | .      | 3 |
| AC.GT       | 4 | 19016979 | 19016990 | 6       | .                  | .       | intergenic | 1.06   | rs790883351 | .      | 2 |
| AAAC.GTTT   | 4 | 19225948 | 19225966 | 4.75    | .                  | .       | intergenic | .      | .           | .      | 2 |
| AAAAC.GTTTT | 4 | 19250745 | 19250770 | 5.2     | .                  | .       | intergenic | .      | rs172182    | rs7904 | 2 |
| AAAC.GTTT   | 4 | 19253068 | 19253088 | 5.25    | .                  | .       | intergenic | -0.204 | rs323127    | rs7863 | 2 |
| AC.GT       | 4 | 19374834 | 19374852 | 9.5     | .                  | .       | intergenic | 0.003  | rs712100598 | .      | 3 |
| AAAAT.ATTTT | 4 | 19774229 | 19774253 | 5       | ENSSSCT00000035287 | COL14A1 | intron     | 0.497  | rs788098968 | .      | 2 |
| AAAAT.ATTTT | 4 | 19774229 | 19774253 | 5       | ENSSSCT00000006580 | COL14A1 | intron     | 0.497  | rs788098968 | .      | 2 |
| AAAC.GTTT   | 4 | 19806287 | 19806309 | 5.75    | ENSSSCT00000035287 | COL14A1 | intron     | -0.172 | rs788355159 | .      | 2 |
| AAAC.GTTT   | 4 | 19806287 | 19806309 | 5.75    | ENSSSCT00000006580 | COL14A1 | intron     | -0.172 | rs788355159 | .      | 2 |
| AAACC.GGTTT | 4 | 19810122 | 19810142 | 3.5     | ENSSSCT00000035287 | COL14A1 | intron     | 1.717  | rs793260201 | .      | 2 |
| AAACC.GGTTT | 4 | 19810122 | 19810142 | 3.5     | ENSSSCT00000006580 | COL14A1 | intron     | 1.717  | rs793260201 | .      | 2 |
| AAAC.GTTT   | 4 | 19841774 | 19841802 | 7.25    | ENSSSCT00000035287 | COL14A1 | intron     | -0.405 | rs787937706 | .      | 3 |
| AAAC.GTTT   | 4 | 19841774 | 19841802 | 7.25    | ENSSSCT00000006580 | COL14A1 | intron     | -0.405 | rs787937706 | .      | 3 |
| AAAC.GTTT   | 4 | 20006695 | 20006718 | 6       | ENSSSCT00000036252 | DEPTOR  | 3'utr      | 0.218  | rs326352    | rs7912 | 2 |
| AAAC.GTTT   | 4 | 20006695 | 20006718 | 6       | ENSSSCT00000034055 | DEPTOR  | intron     | 0.218  | rs326352    | rs7912 | 2 |
| AT.AT       | 4 | 20056152 | 20056162 | 5.5     | ENSSSCT00000034055 | DEPTOR  | intron     | .      | rs788345458 | .      | 3 |
| AT.AT       | 4 | 20056152 | 20056162 | 5.5     | ENSSSCT00000036252 | DEPTOR  | intron     | .      | rs788345458 | .      | 3 |
| AT.AT       | 4 | 20056152 | 20056162 | 5.5     | ENSSSCT00000006581 | DEPTOR  | intron     | .      | rs788345458 | .      | 3 |
| AT.AT       | 4 | 20056152 | 20056162 | 5.5     | ENSSSCT00000034473 | DEPTOR  | intron     | .      | rs788345458 | .      | 3 |
| AAACC.GGTTT | 4 | 20088258 | 20088276 | 3.8     | ENSSSCT00000006581 | DEPTOR  | intron     | .      | rs789452135 | .      | 2 |
| AAACC.GGTTT | 4 | 20088258 | 20088276 | 3.8     | ENSSSCT00000034473 | DEPTOR  | intron     | .      | rs789452135 | .      | 2 |
| AAACC.GGTTT | 4 | 20088258 | 20088276 | 3.8     | ENSSSCT00000036252 | DEPTOR  | intron     | .      | rs789452135 | .      | 2 |
| AAAC.GTTT   | 4 | 20103532 | 20103558 | 6.75    | ENSSSCT00000006581 | DEPTOR  | intron     | 0.364  | rs788621269 | .      | 2 |
| AAAC.GTTT   | 4 | 20103532 | 20103558 | 6.75    | ENSSSCT00000034473 | DEPTOR  | intron     | 0.364  | rs788621269 | .      | 2 |
| AAAC.GTTT   | 4 | 20103532 | 20103558 | 6.75    | ENSSSCT00000036252 | DEPTOR  | intron     | 0.364  | rs788621269 | .      | 2 |
| AT.AT       | 4 | 20264682 | 20264694 | 6.5     | ENSSSCT00000006583 | TAF2    | intron     | 0.25   | rs793721047 | .      | 4 |
| AT.AT       | 4 | 20264682 | 20264694 | 6.5     | ENSSSCT00000033583 | TAF2    | intron     | 0.25   | rs793721047 | .      | 4 |
| AT.AT       | 4 | 20264682 | 20264694 | 6.5     | ENSSSCT00000034647 | TAF2    | intron     | 0.25   | rs793721047 | .      | 4 |
| AAT.ATT     | 4 | 20275152 | 20275164 | 4.33333 | ENSSSCT00000006583 | TAF2    | intron     | 0.081  | .           | .      | 2 |
| AAT.ATT     | 4 | 20275152 | 20275164 | 4.33333 | ENSSSCT00000033583 | TAF2    | intron     | 0.081  | .           | .      | 2 |
| AAT.ATT     | 4 | 20275152 | 20275164 | 4.33333 | ENSSSCT00000034647 | TAF2    | intron     | 0.081  | .           | .      | 2 |
| AAATC.GATTT | 4 | 20378715 | 20378742 | 5.6     | ENSSSCT00000006585 | ENPP2   | intron     | -0.369 | rs793610594 | .      | 2 |
| AAAC.GTTT   | 4 | 20410270 | 20410292 | 5.75    | ENSSSCT00000006585 | ENPP2   | intron     | 0.46   | rs788456489 | .      | 3 |
| AAT.ATT     | 4 | 20448994 | 20449017 | 8       | ENSSSCT00000006585 | ENPP2   | intron     | -0.169 | rs792595269 | .      | 2 |
| AATG.CATT   | 4 | 20504033 | 20504059 | 6.75    | .                  | .       | intergenic | 0.08   | rs158900    | rs7905 | 2 |
| AAT.ATT     | 4 | 20504839 | 20504850 | 4       | .                  | .       | intergenic | -0.073 | .           | .      | 2 |
| AAAAG.CTTTT | 4 | 20572605 | 20572628 | 4.8     | .                  | .       | intergenic | 0.05   | rs791852858 | .      | 2 |
| AG.CT       | 4 | 20615447 | 20615461 | 7.5     | ENSSSCT00000006587 | MAL2    | 3'utr      | 0.395  | .           | .      | 2 |
| AC.GT       | 4 | 20648955 | 20648965 | 5.5     | .                  | .       | intergenic | 0.131  | .           | .      | 2 |
| AT.AT       | 4 | 20655478 | 20655490 | 6.5     | .                  | .       | intergenic | 0.092  | .           | .      | 3 |
| AAGC.CCTT   | 4 | 20674671 | 20674688 | 4.5     | .                  | .       | intergenic | 0.003  | rs792477340 | .      | 2 |
| AT.AT       | 4 | 20839501 | 20839513 | 6.5     | .                  | .       | intergenic | -0.004 | rs788243844 | .      | 2 |
| AC.GT       | 4 | 20997483 | 20997495 | 6.5     | .                  | .       | intergenic | 0.166  | rs792884111 | .      | 2 |
| AG.CT       | 4 | 21200378 | 21200390 | 6.5     | .                  | .       | intergenic | -0.05  | rs745662    | rs7934 | 2 |
| AC.GT       | 4 | 21247674 | 21247686 | 6.5     | .                  | .       | intergenic | 0.055  | rs159871    | rs7883 | 2 |
| AAAT.ATTT   | 4 | 21402576 | 21402595 | 5       | .                  | .       | intergenic | -0.161 | rs787517754 | .      | 3 |
| AATG.CATT   | 4 | 21466125 | 21466143 | 4.75    | .                  | .       | intergenic | -0.095 | rs789626174 | .      | 2 |
| AG.CT       | 4 | 21710514 | 21710524 | 5.5     | .                  | .       | intergenic | 0.066  | rs508321    | rs7923 | 2 |
| AAAAC.GTTTT | 4 | 21738843 | 21738864 | 3.66667 | .                  | .       | intergenic | 0.134  | rs791973844 | .      | 2 |
| AAAG.CTTT   | 4 | 21859604 | 21859623 | 5       | .                  | .       | intergenic | 0.363  | rs722409    | rs7925 | 2 |
| AG.CT       | 4 | 21864582 | 21864604 | 11.5    | .                  | .       | intergenic | -0.048 | rs793763025 | .      | 2 |
| AAAAC.GTTTT | 4 | 21872410 | 21872433 | 4.8     | .                  | .       | intergenic | 0.001  | rs790036415 | .      | 3 |
| AC.GT       | 4 | 21963529 | 21963556 | 14      | .                  | .       | intergenic | -0.047 | .           | .      | 3 |
| AC.GT       | 4 | 22088178 | 22088195 | 9       | ENSSSCT00000006593 | EXT1    | promoter   | 1.316  | .           | .      | 3 |
| AC.GT       | 4 | 22088178 | 22088195 | 9       | ENSSSCT00000033159 | EXT1    | promoter   | 1.316  | .           | .      | 3 |
| AC.GT       | 4 | 22281117 | 22281131 | 7.5     | .                  | .       | intergenic | .      | .           | .      | 2 |
| AAAT.ATTT   | 4 | 22313313 | 22313330 | 4.5     | .                  | .       | intergenic | .      | rs705535    | rs7899 | 2 |
| AG.CT       | 4 | 22318563 | 22318574 | 6       | .                  | .       | intergenic | 0.477  | rs788091019 | .      | 2 |
| AC.GT       | 4 | 22523383 | 22523398 | 8       | .                  | .       | intergenic | .      | rs789076435 | .      | 2 |
| AC.GT       | 4 | 22606937 | 22606957 | 10.5    | .                  | .       | intergenic | 0.017  | .           | .      | 4 |
| AC.GT       | 4 | 22610185 | 22610199 | 7.5     | .                  | .       | intergenic | -0.036 | rs790665028 | .      | 2 |
| AT.AT       | 4 | 22703190 | 22703199 | 5       | .                  | .       | intergenic | -0.099 | .           | .      | 2 |
| AT.AT       | 4 | 22748154 | 22748165 | 6       | .                  | .       | intergenic | 0.202  | .           | .      | 3 |
| AAT.ATT     | 4 | 22766210 | 22766228 | 6.33333 | .                  | .       | intergenic | 0.226  | .           | .      | 2 |
| AG.CT       | 4 | 22820289 | 22820300 | 6       | ENSSSCT00000035755 | SLC30A8 | intron     | .      | rs787479890 | .      | 2 |
| AG.CT       | 4 | 22820289 | 22820300 | 6       | ENSSSCT00000006597 | SLC30A8 | intron     | .      | rs787479890 | .      | 2 |
| AAAAC.GTTTT | 4 | 22852602 | 22852626 | 5       | .                  | .       | intergenic | 0.334  | rs791498400 | .      | 2 |
| AC.GT       | 4 | 22856504 | 22856542 | 19.5    | .                  | .       | intergenic | 0.041  | rs786562340 | .      | 6 |
| ACTG.CAGT   | 4 | 22870012 | 22870034 | 5.75    | .                  | .       | intergenic | 0.164  | rs792377824 | .      | 2 |
| AAAT.ATTT   | 4 | 22873035 | 22873067 | 8.25    | .                  | .       | intergenic | 0.097  | rs338782    | rs7906 | 2 |
| AAAC.GTTT   | 4 | 22946754 | 22946776 | 5.75    | .                  | .       | intergenic | 0.104  | rs789538894 | .      | 2 |
| AC.GT       | 4 | 23065350 | 23065366 | 8.5     | ENSSSCT00000033947 | RAD21   | intron     | .      | .           | .      | 3 |
| AC.GT       | 4 | 23065350 | 23065366 | 8.5     | ENSSSCT00000006600 | RAD21   | intron     | .      | .           | .      | 3 |

|              |   |          |          |         |                    |        |            |        |               |   |
|--------------|---|----------|----------|---------|--------------------|--------|------------|--------|---------------|---|
| AAAC.GTTT    | 4 | 23125085 | 23125099 | 3.75    | ENSSSCT00000006600 | RAD21  | intron     | .      | 723748 rs7935 | 2 |
| ACC.GGT      | 4 | 23152311 | 23152329 | 6.33333 | ENSSSCT00000006600 | RAD21  | intron     | .      | rs788041336   | 2 |
| AAC.GTT      | 4 | 24552019 | 24552036 | 6       | .                  | .      | intergenic | 0.37   | rs791493224   | 4 |
| AAAC.GTTT    | 4 | 24554660 | 24554680 | 5.25    | .                  | .      | intergenic | 0.206  | rs790027003   | 2 |
| AC.GT        | 4 | 24699536 | 24699550 | 7.5     | .                  | .      | intergenic | .      | rs793033031   | 2 |
| AC.GT        | 4 | 24839841 | 24839851 | 5.5     | ENSSSCT00000006604 | TRPS1  | intron     | .      | rs790021406   | 2 |
| AAAT.ATTT    | 4 | 25094093 | 25094111 | 4.75    | .                  | .      | intergenic | 0.162  | .             | 2 |
| AG.CT        | 4 | 25190850 | 25190859 | 5       | .                  | .      | intergenic | 0.013  | rs787062006   | 2 |
| AC.GT        | 4 | 25219346 | 25219358 | 6.5     | .                  | .      | intergenic | -0.124 | rs791987235   | 2 |
| ATC.GAT      | 4 | 25309991 | 25310004 | 4.66667 | .                  | .      | intergenic | -0.115 | 770108 rs7916 | 3 |
| AG.CT        | 4 | 25317202 | 25317225 | 12      | .                  | .      | intergenic | 0.059  | rs793126807   | 4 |
| ACAT.ATGT    | 4 | 25329967 | 25329990 | 6       | .                  | .      | intergenic | -0.098 | rs787376958   | 2 |
| AT.AT        | 4 | 25472143 | 25472156 | 7       | .                  | .      | intergenic | -0.058 | 327175 rs7872 | 4 |
| AC.GT        | 4 | 25488800 | 25488812 | 6.5     | .                  | .      | intergenic | -0.019 | rs790900331   | 2 |
| AT.AT        | 4 | 25504607 | 25504622 | 8       | .                  | .      | intergenic | .      | 145723 rs7865 | 3 |
| AT.AT        | 4 | 25653752 | 25653764 | 6.5     | .                  | .      | intergenic | .      | .             | 4 |
| AT.AT        | 4 | 25695870 | 25695881 | 6       | .                  | .      | intergenic | -0.084 | .             | 2 |
| AAAT.ATTT    | 4 | 25848227 | 25848247 | 5.25    | .                  | .      | intergenic | -0.007 | rs793596109   | 2 |
| AAAC.GTTT    | 4 | 25951308 | 25951326 | 4.75    | .                  | .      | intergenic | -0.021 | 375130 rs7895 | 2 |
| AAAAC.GTTTTT | 4 | 26057482 | 26057499 | 3       | .                  | .      | intergenic | -0.05  | rs701864834   | 2 |
| AAC.GTT      | 4 | 26188658 | 26188680 | 7.66667 | .                  | .      | intergenic | -0.123 | 500313 rs7935 | 2 |
| AAC.GTT      | 4 | 26194571 | 26194587 | 5.66667 | .                  | .      | intergenic | .      | 342062 rs7932 | 2 |
| AAAAT.ATTTT  | 4 | 26259760 | 26259783 | 4.8     | .                  | .      | intergenic | .      | 329424 rs7937 | 2 |
| AC.GT        | 4 | 26408372 | 26408390 | 9.5     | .                  | .      | intergenic | 0.115  | rs790945249   | 2 |
| AT.AT        | 4 | 26566340 | 26566349 | 5       | .                  | .      | intergenic | 0.077  | rs793740238   | 2 |
| AC.GT        | 4 | 26956784 | 26956805 | 11      | .                  | .      | intergenic | -0.103 | rs789666580   | 2 |
| AAAG.CTTT    | 4 | 27337361 | 27337372 | 3       | .                  | .      | intergenic | -0.11  | .             | 2 |
| AG.CT        | 4 | 27403055 | 27403087 | 16.5    | .                  | .      | intergenic | -0.02  | rs792639487   | 2 |
| AAAAC.GTTTT  | 4 | 27733803 | 27733826 | 4.8     | ENSSSCT00000032782 | CSMD3  | intron     | -0.017 | 356707 rs7886 | 2 |
| AAAC.GTTT    | 4 | 27745616 | 27745633 | 4.5     | ENSSSCT00000032782 | CSMD3  | intron     | -0.014 | rs790263585   | 2 |
| AT.AT        | 4 | 27787573 | 27787585 | 6.5     | .                  | .      | intergenic | -0.162 | rs788531378   | 2 |
| AAGT.ACTT    | 4 | 27810039 | 27810050 | 3       | .                  | .      | intergenic | 0.301  | rs792125711   | 2 |
| AAAC.GTTT    | 4 | 27893021 | 27893039 | 4.75    | .                  | .      | intergenic | -0.057 | rs789434998   | 2 |
| AT.AT        | 4 | 27912038 | 27912047 | 5       | .                  | .      | intergenic | .      | .             | 2 |
| AG.CT        | 4 | 28107775 | 28107793 | 9.5     | .                  | .      | intergenic | 0.089  | rs786787905   | 3 |
| AAAC.GTTT    | 4 | 28630313 | 28630333 | 5.25    | .                  | .      | intergenic | -0.033 | rs791608721   | 2 |
| AAC.GTT      | 4 | 28767896 | 28767912 | 5.66667 | .                  | .      | intergenic | .      | .             | 2 |
| AC.GT        | 4 | 28829391 | 28829404 | 7       | .                  | .      | intergenic | .      | rs793159059   | 4 |
| AAAAC.GTTTT  | 4 | 28906858 | 28906886 | 5.8     | .                  | .      | intergenic | .      | rs791989803   | 2 |
| AT.AT        | 4 | 29006083 | 29006092 | 5       | .                  | .      | intergenic | 0.073  | rs791149212   | 2 |
| AAT.ATT      | 4 | 29133145 | 29133160 | 5.33333 | .                  | .      | intergenic | 0.128  | 381093 rs7900 | 2 |
| AAC.GTT      | 4 | 29290618 | 29290636 | 6.33333 | .                  | .      | intergenic | .      | 396457 rs7893 | 2 |
| AT.AT        | 4 | 29549568 | 29549579 | 6       | .                  | .      | intergenic | 0.001  | rs791375101   | 4 |
| AAAAC.GTTTT  | 4 | 29870449 | 29870467 | 3.8     | .                  | .      | intergenic | 0.245  | .             | 2 |
| AC.GT        | 4 | 29879616 | 29879629 | 7       | .                  | .      | intergenic | 0.006  | 757265 rs7877 | 2 |
| AAAC.GTTT    | 4 | 30252710 | 30252724 | 3.75    | ENSSSCT00000006611 | EBAG9  | intron     | 0.195  | rs792582363   | 2 |
| AG.CT        | 4 | 30264673 | 30264686 | 7       | .                  | .      | intergenic | 0.084  | rs788079395   | 2 |
| AAT.ATT      | 4 | 30865290 | 30865303 | 4.66667 | .                  | .      | intergenic | 0.108  | rs790561795   | 2 |
| AATG.CATT    | 4 | 30970248 | 30970274 | 6.75    | .                  | .      | intergenic | .      | rs791887749   | 2 |
| AT.AT        | 4 | 31018344 | 31018354 | 5.5     | .                  | .      | intergenic | 0.02   | 366836 rs7886 | 3 |
| AC.GT        | 4 | 31063946 | 31063961 | 8       | ENSSSCT00000034120 | TMEM74 | 5'utr      | 0.125  | 303387 rs7879 | 2 |
| AC.GT        | 4 | 31063946 | 31063961 | 8       | ENSSSCT00000006620 | TMEM74 | promoter   | 0.125  | 303387 rs7879 | 2 |
| ACAT.ATGT    | 4 | 31605088 | 31605110 | 5.75    | .                  | .      | intergenic | .      | rs702204322   | 2 |
| AG.CT        | 4 | 31614200 | 31614215 | 8       | .                  | .      | intergenic | .      | .             | 2 |
| AAT.ATT      | 4 | 31784048 | 31784063 | 5.33333 | .                  | .      | intergenic | .      | .             | 2 |
| AC.GT        | 4 | 31949510 | 31949520 | 5.5     | ENSSSCT00000006623 | RSPO2  | intron     | .      | rs787653506   | 2 |
| AAAT.ATTT    | 4 | 32142191 | 32142209 | 4.75    | .                  | .      | intergenic | 0.03   | rs790625674   | 2 |
| AC.GT        | 4 | 32409386 | 32409396 | 5.5     | .                  | .      | intergenic | .      | .             | 4 |
| AAC.GTT      | 4 | 32839314 | 32839327 | 4.66667 | .                  | .      | intergenic | .      | rs789863448   | 2 |
| AG.CT        | 4 | 32851481 | 32851490 | 5       | .                  | .      | intergenic | 0.02   | rs793868839   | 2 |
| AAC.GTT      | 4 | 33051326 | 33051339 | 4.66667 | .                  | .      | intergenic | .      | .             | 3 |
| ACC.GGT      | 4 | 33377944 | 33377963 | 6.66667 | ENSSSCT00000006626 | .      | 3'utr      | 0.808  | rs793392309   | 2 |
| AAT.ATT      | 4 | 33592029 | 33592049 | 7       | .                  | .      | intergenic | -0.037 | rs787704827   | 2 |
| AC.GT        | 4 | 33668035 | 33668048 | 7       | .                  | .      | intergenic | -0.006 | .             | 3 |
| AC.GT        | 4 | 33781359 | 33781373 | 7.5     | .                  | .      | intergenic | 0.013  | 390097 rs7898 | 3 |
| AAG.CTT      | 4 | 33815537 | 33815552 | 5.33333 | .                  | .      | intergenic | -0.176 | 377920 rs7906 | 2 |
| AATC.GATT    | 4 | 34082211 | 34082228 | 4.5     | .                  | .      | intergenic | .      | rs786401776   | 2 |
| AC.GT        | 4 | 34280725 | 34280752 | 14      | ENSSSCT00000006627 | ZFPM2  | intron     | 0.443  | rs792311825   | 5 |
| AC.GT        | 4 | 34331267 | 34331282 | 8       | ENSSSCT00000006627 | ZFPM2  | intron     | 0.222  | .             | 4 |
| AAAG.CTTT    | 4 | 34331899 | 34331912 | 3.5     | ENSSSCT00000006627 | ZFPM2  | intron     | 0.046  | 393505 rs7891 | 2 |
| AT.AT        | 4 | 34333559 | 34333568 | 5       | ENSSSCT00000006627 | ZFPM2  | intron     | -0.066 | rs787578503   | 2 |
| AAAAT.ATTTT  | 4 | 34347204 | 34347234 | 6.2     | ENSSSCT00000006627 | ZFPM2  | intron     | 0.044  | rs703940018   | 2 |
| AAAC.GTTT    | 4 | 34549740 | 34549754 | 3.75    | ENSSSCT00000006627 | ZFPM2  | intron     | -0.211 | rs791996694   | 2 |
| AAAAC.GTTTT  | 4 | 34788970 | 34788998 | 5.8     | .                  | .      | intergenic | .      | rs786743055   | 3 |
| AAAC.GTTT    | 4 | 34805281 | 34805313 | 8.25    | .                  | .      | intergenic | 0.086  | rs786827137   | 2 |
| AAC.GTT      | 4 | 34950034 | 34950061 | 9.33333 | .                  | .      | intergenic | .      | rs792192542   | 2 |
| AAT.ATT      | 4 | 35066287 | 35066311 | 8.33333 | .                  | .      | intergenic | 0.042  | rs791626818   | 2 |
| AC.GT        | 4 | 35083134 | 35083146 | 6.5     | .                  | .      | intergenic | 0.397  | 794530 rs7892 | 2 |
| AATG.CATT    | 4 | 35252883 | 35252908 | 6.5     | .                  | .      | intergenic | .      | 75464 rs7868  | 2 |
| AAAG.CTTT    | 4 | 35365775 | 35365796 | 5.5     | .                  | .      | intergenic | 0.022  | 112542 rs7937 | 2 |
| AAAAC.GTTTT  | 4 | 35538023 | 35538041 | 3.8     | ENSSSCT00000006629 | DPYS   | intron     | .      | rs704086484   | 2 |
| AC.GT        | 4 | 35810110 | 35810126 | 8.5     | ENSSSCT00000006634 | RIMS2  | intron     | 0.117  | 143803 rs7884 | 3 |
| AAT.ATT      | 4 | 35881150 | 35881178 | 9.66667 | ENSSSCT00000006634 | RIMS2  | intron     | 0.149  | rs696825635   | 2 |
| AAGG.CCTT    | 4 | 35881700 | 35881712 | 3.25    | ENSSSCT00000006634 | RIMS2  | intron     | 0.238  | .             | 2 |

|              |   |          |          |         |                    |           |            |        |               |   |
|--------------|---|----------|----------|---------|--------------------|-----------|------------|--------|---------------|---|
| AAT.ATT      | 4 | 35909079 | 35909097 | 6.33333 | ENSSSCT00000006634 | RIMS2     | intron     | 0.121  | rs793302596   | 2 |
| AAGC.GCTT    | 4 | 35962821 | 35962842 | 5.5     | .                  | .         | intergenic | .      | 138804 rs7890 | 2 |
| AAC.GTT      | 4 | 36072094 | 36072109 | 5.33333 | ENSSSCT00000029168 | .         | intron     | 0.118  | 270986 rs7912 | 2 |
| AAAAC.GTTTT  | 4 | 36262406 | 36262430 | 5       | .                  | .         | intergenic | 0.173  | rs696189827   | 2 |
| AAAC.GTTT    | 4 | 36331238 | 36331256 | 4.75    | .                  | .         | intergenic | .      | rs788656338   | 2 |
| AAAAT.ATTTT  | 4 | 36468495 | 36468509 | 3       | ENSSSCT00000006637 | DCAF13    | intron     | -0.022 | rs788380830   | 2 |
| AG.CT        | 4 | 36815871 | 36815880 | 5       | .                  | .         | intergenic | 0.092  | rs793084015   | 2 |
| AC.GT        | 4 | 36820743 | 36820758 | 8       | .                  | .         | intergenic | 0.083  | rs789966357   | 2 |
| AC.GT        | 4 | 36918468 | 36918477 | 5       | ENSSSCT00000006643 | ATP6V1C1  | promoter   | 0.159  | .             | 3 |
| AAAC.GTTT    | 4 | 37033825 | 37033843 | 4.75    | .                  | .         | intergenic | 0.345  | rs793454367   | 2 |
| AAAC.GTTT    | 4 | 37264898 | 37264917 | 5       | .                  | .         | intergenic | -0.035 | 320848 rs7866 | 2 |
| AAAT.ATTT    | 4 | 37296981 | 37297001 | 5.25    | .                  | .         | intergenic | 0.003  | rs791217992   | 2 |
| AAAG.CTTT    | 4 | 37306353 | 37306365 | 3.25    | .                  | .         | intergenic | -0.096 | rs791887842   | 2 |
| AT.AT        | 4 | 37675813 | 37675827 | 7.5     | .                  | .         | intergenic | 0.111  | rs786883455   | 4 |
| AAAT.ATTT    | 4 | 37781813 | 37781831 | 4.75    | ENSSSCT00000035758 | CU633679. | intron     | .      | rs789729881   | 2 |
| AATT.AATT    | 4 | 37855832 | 37855856 | 6.25    | .                  | .         | intergenic | .      | rs790345029   | 2 |
| AG.CT        | 4 | 37858170 | 37858179 | 5       | .                  | .         | intergenic | -0.074 | rs787131631   | 2 |
| AG.CT        | 4 | 38010569 | 38010582 | 7       | ENSSSCT00000035357 | NCALD     | intron     | -0.073 | rs791157844   | 2 |
| AG.CT        | 4 | 38010569 | 38010582 | 7       | ENSSSCT00000006648 | NCALD     | intron     | -0.073 | rs791157844   | 2 |
| \AAAAC.GTTTT | 4 | 38174692 | 38174714 | 3.83333 | ENSSSCT00000036111 | NCALD     | intron     | 0.06   | rs789261322   | 2 |
| \AAAAC.GTTTT | 4 | 38174692 | 38174714 | 3.83333 | ENSSSCT00000035298 | NCALD     | intron     | 0.06   | rs789261322   | 2 |
| \AAAAC.GTTTT | 4 | 38174692 | 38174714 | 3.83333 | ENSSSCT00000035679 | NCALD     | intron     | 0.06   | rs789261322   | 2 |
| \AAAAC.GTTTT | 4 | 38174692 | 38174714 | 3.83333 | ENSSSCT00000006648 | NCALD     | intron     | 0.06   | rs789261322   | 2 |
| \AAAAC.GTTTT | 4 | 38174692 | 38174714 | 3.83333 | ENSSSCT00000032895 | NCALD     | intron     | 0.06   | rs789261322   | 2 |
| \AAAAC.GTTTT | 4 | 38174692 | 38174714 | 3.83333 | ENSSSCT00000035469 | NCALD     | intron     | 0.06   | rs789261322   | 2 |
| \AAAAC.GTTTT | 4 | 38174692 | 38174714 | 3.83333 | ENSSSCT00000033437 | NCALD     | intron     | 0.06   | rs789261322   | 2 |
| \AAAAC.GTTTT | 4 | 38174692 | 38174714 | 3.83333 | ENSSSCT00000035357 | NCALD     | intron     | 0.06   | rs789261322   | 2 |
| \AAAAC.GTTTT | 4 | 38174692 | 38174714 | 3.83333 | ENSSSCT00000033719 | NCALD     | intron     | 0.06   | rs789261322   | 2 |
| \AAAAC.GTTTT | 4 | 38174692 | 38174714 | 3.83333 | ENSSSCT00000034691 | NCALD     | intron     | 0.06   | rs789261322   | 2 |
| \AAAAC.GTTTT | 4 | 38174692 | 38174714 | 3.83333 | ENSSSCT00000033597 | NCALD     | intron     | 0.06   | rs789261322   | 2 |
| \AAAAC.GTTTT | 4 | 38174692 | 38174714 | 3.83333 | ENSSSCT00000034309 | NCALD     | intron     | 0.06   | rs789261322   | 2 |
| AAC.GTT      | 4 | 38180136 | 38180161 | 8.66667 | ENSSSCT00000036111 | NCALD     | intron     | -0.127 | rs793273220   | 2 |
| AAC.GTT      | 4 | 38180136 | 38180161 | 8.66667 | ENSSSCT00000035298 | NCALD     | intron     | -0.127 | rs793273220   | 2 |
| AAC.GTT      | 4 | 38180136 | 38180161 | 8.66667 | ENSSSCT00000035679 | NCALD     | intron     | -0.127 | rs793273220   | 2 |
| AAC.GTT      | 4 | 38180136 | 38180161 | 8.66667 | ENSSSCT00000006648 | NCALD     | intron     | -0.127 | rs793273220   | 2 |
| AAC.GTT      | 4 | 38180136 | 38180161 | 8.66667 | ENSSSCT00000032895 | NCALD     | intron     | -0.127 | rs793273220   | 2 |
| AAC.GTT      | 4 | 38180136 | 38180161 | 8.66667 | ENSSSCT00000035469 | NCALD     | intron     | -0.127 | rs793273220   | 2 |
| AAC.GTT      | 4 | 38180136 | 38180161 | 8.66667 | ENSSSCT00000033437 | NCALD     | intron     | -0.127 | rs793273220   | 2 |
| AAC.GTT      | 4 | 38180136 | 38180161 | 8.66667 | ENSSSCT00000035357 | NCALD     | intron     | -0.127 | rs793273220   | 2 |
| AAC.GTT      | 4 | 38180136 | 38180161 | 8.66667 | ENSSSCT00000033719 | NCALD     | intron     | -0.127 | rs793273220   | 2 |
| AAC.GTT      | 4 | 38180136 | 38180161 | 8.66667 | ENSSSCT00000034691 | NCALD     | intron     | -0.127 | rs793273220   | 2 |
| AAC.GTT      | 4 | 38180136 | 38180161 | 8.66667 | ENSSSCT00000033597 | NCALD     | intron     | -0.127 | rs793273220   | 2 |
| AAC.GTT      | 4 | 38180136 | 38180161 | 8.66667 | ENSSSCT00000034309 | NCALD     | intron     | -0.127 | rs793273220   | 2 |
| AAAAC.GTTTT  | 4 | 38320049 | 38320069 | 4.2     | ENSSSCT00000006649 | GRHL2     | intron     | -0.119 | rs787589205   | 2 |
| AATG.CATT    | 4 | 38329519 | 38329535 | 4.25    | ENSSSCT00000006649 | GRHL2     | intron     | -0.031 | .             | 2 |
| AG.CT        | 4 | 38444191 | 38444202 | 6       | .                  | .         | intergenic | -0.02  | rs791153296   | 2 |
| AAC.GTT      | 4 | 38575770 | 38575788 | 6.33333 | .                  | .         | intergenic | .      | rs793800938   | 2 |
| AC.GT        | 4 | 38629307 | 38629336 | 15      | .                  | .         | intergenic | -0.002 | .             | 3 |
| AAAC.GTTT    | 4 | 38979237 | 38979253 | 4.25    | .                  | .         | intergenic | -0.047 | rs787312116   | 2 |
| AG.CT        | 4 | 39054102 | 39054111 | 5       | .                  | .         | intergenic | -0.148 | rs789371624   | 2 |
| AAT.ATT      | 4 | 39274211 | 39274228 | 6       | ENSSSCT00000006653 | SNX31     | intron     | 0.128  | rs792926022   | 2 |
| AAAG.CTTT    | 4 | 39285799 | 39285813 | 3.75    | ENSSSCT00000006653 | SNX31     | intron     | .      | rs792128919   | 2 |
| AAAT.ATTT    | 4 | 39369168 | 39369193 | 6.5     | .                  | .         | intergenic | -0.187 | rs791457235   | 2 |
| AC.GT        | 4 | 39377793 | 39377809 | 8.5     | .                  | .         | intergenic | 0.092  | rs793590163   | 2 |
| AAAC.GTTT    | 4 | 39384005 | 39384026 | 5.5     | .                  | .         | intergenic | 0.186  | rs791631132   | 2 |
| AAAG.CTTT    | 4 | 39469678 | 39469696 | 4.75    | .                  | .         | intergenic | 0.032  | rs787276169   | 2 |
| AAAT.ATTT    | 4 | 39595733 | 39595755 | 5.75    | ENSSSCT00000006656 | RNF19A    | intron     | 0.139  | 284808 rs7908 | 2 |
| AC.GT        | 4 | 39619636 | 39619647 | 6       | ENSSSCT00000006656 | RNF19A    | intron     | 0.275  | rs787441047   | 4 |
| AG.CT        | 4 | 39821996 | 39822010 | 7.5     | .                  | .         | intergenic | 0.458  | .             | 3 |
| AC.GT        | 4 | 39936508 | 39936520 | 6.5     | ENSSSCT00000006660 | RGS22     | intron     | 0.098  | rs789508917   | 2 |
| AC.GT        | 4 | 39956215 | 39956228 | 7       | ENSSSCT00000006660 | RGS22     | intron     | .      | rs787811735   | 2 |
| AAAT.ATTT    | 4 | 39965055 | 39965072 | 4.5     | .                  | .         | intergenic | .      | .             | 2 |
| AATC.GATT    | 4 | 39979661 | 39979676 | 4       | .                  | .         | intergenic | 0.029  | .             | 2 |
| AAAC.GTTT    | 4 | 39982387 | 39982411 | 6.25    | .                  | .         | intergenic | 0.166  | rs786476603   | 2 |
| AG.CT        | 4 | 40008999 | 40009011 | 6.5     | ENSSSCT00000006662 | .         | intron     | 0.143  | rs790538723   | 2 |
| AATG.CATT    | 4 | 40118990 | 40119029 | 10      | ENSSSCT00000006662 | .         | intron     | 0.648  | rs793602475   | 2 |
| AT.AT        | 4 | 40258821 | 40258832 | 6       | .                  | .         | intergenic | 0.109  | .             | 2 |
| AT.AT        | 4 | 40322151 | 40322166 | 8       | .                  | .         | intergenic | 0.135  | rs786704459   | 2 |
| AAC.GTT      | 4 | 40496113 | 40496127 | 5       | ENSSSCT00000030508 | .         | intron     | 0.529  | rs793111008   | 3 |
| AC.GT        | 4 | 40584808 | 40584818 | 5.5     | ENSSSCT00000030508 | .         | intron     | 0.159  | .             | 2 |
| AAAC.GTTT    | 4 | 41010776 | 41010791 | 4       | .                  | .         | intergenic | -0.083 | rs788734925   | 2 |
| AAAT.ATTT    | 4 | 41142871 | 41142888 | 4.5     | ENSSSCT00000006665 | STK3      | intron     | 0.293  | rs787112513   | 2 |
| AC.GT        | 4 | 41325220 | 41325229 | 5       | .                  | .         | intergenic | .      | rs790943933   | 2 |
| AAC.GTT      | 4 | 41327724 | 41327737 | 4.66667 | .                  | .         | intergenic | .      | 326084 rs7895 | 4 |
| AG.CT        | 4 | 41455476 | 41455490 | 7.5     | .                  | .         | intergenic | -0.09  | rs790150311   | 2 |
| AG.CT        | 4 | 41466719 | 41466732 | 7       | .                  | .         | intergenic | .      | rs789916180   | 2 |
| AAAC.GTTT    | 4 | 41522955 | 41522971 | 4.25    | .                  | .         | intergenic | -0.103 | 194394 rs7885 | 2 |
| AAAAC.GTTTT  | 4 | 41628113 | 41628132 | 4       | ENSSSCT00000026541 | .         | intron     | -0.019 | 306904 rs7888 | 2 |
| AAAC.GTTT    | 4 | 41633206 | 41633229 | 6       | ENSSSCT00000026541 | .         | 3'utr      | .      | rs790229163   | 2 |
| AAAT.ATTT    | 4 | 41643853 | 41643869 | 4.25    | .                  | .         | intergenic | .      | rs787208026   | 2 |
| AAAC.GTTT    | 4 | 41726628 | 41726646 | 4.75    | ENSSSCT00000023470 | .         | intron     | .      | 513669 rs7931 | 4 |
| AAAC.GTTT    | 4 | 41726628 | 41726646 | 4.75    | ENSSSCT00000006669 | .         | intron     | .      | 513669 rs7931 | 4 |
| AAAC.GTTT    | 4 | 41809188 | 41809202 | 3.75    | ENSSSCT00000006670 | HRSP12    | intron     | 0.103  | .             | 2 |
| AAAC.GTTT    | 4 | 41809188 | 41809202 | 3.75    | ENSSSCT00000023470 | .         | promoter   | 0.103  | .             | 2 |

|              |   |          |          |         |                     |            |            |        |          |             |        |   |
|--------------|---|----------|----------|---------|---------------------|------------|------------|--------|----------|-------------|--------|---|
| AAAC.GTTT    | 4 | 41809188 | 41809202 | 3.75    | ENSSSCT00000006669  | .          | promoter   | 0.103  | .        | .           | 2      |   |
| AAT.ATT      | 4 | 41947039 | 41947057 | 6.33333 | .                   | .          | intergenic | 0.209  | rs80968  | rs7873      | 2      |   |
| AAAC.GTTT    | 4 | 42024168 | 42024183 | 4       | ENSSSCT00000006674  | LAPTM4B    | intron     | 0.105  | rs344499 | rs7872      | 2      |   |
| AAAAC.GTTTT  | 4 | 42263507 | 42263532 | 5.2     | .                   | .          | intergenic | .      | rs192889 | rs7873      | 2      |   |
| AAAC.GTTT    | 4 | 42473814 | 42473830 | 4.25    | ENSSSCT000000034269 | CU302278.8 | promoter   | 0.175  | .        | rs790164653 | 3      |   |
| AG.CT        | 4 | 42522157 | 42522177 | 10.5    | ENSSSCT00000006678  | .          | intron     | 0.214  | .        | rs792916576 | 4      |   |
| AG.CT        | 4 | 42883848 | 42883857 | 5       | ENSSSCT00000006678  | .          | intron     | 0.567  | .        | rs789405615 | 2      |   |
| AAAG.CTTT    | 4 | 42917013 | 42917025 | 3.25    | ENSSSCT00000006678  | .          | intron     | .      | .        | rs789916649 | 2      |   |
| AAAC.GTTT    | 4 | 43125816 | 43125839 | 6       | ENSSSCT00000006679  | SDC2       | intron     | 0.511  | .        | rs793876679 | 2      |   |
| AAT.ATT      | 4 | 43174356 | 43174389 | 11.3333 | .                   | .          | intergenic | -0.06  | rs120590 | rs7922      | 2      |   |
| AAAC.GTTT    | 4 | 43234734 | 43234762 | 7.25    | .                   | .          | intergenic | 0.236  | rs779661 | rs7903      | 2      |   |
| AT.AT        | 4 | 43306366 | 43306394 | 14.5    | .                   | .          | intergenic | .      | .        | rs787408333 | 2      |   |
| AAC.GTT      | 4 | 43511356 | 43511369 | 4.66667 | ENSSSCT00000006680  | PTDSS1     | intron     | -0.19  | .        | rs790517324 | 2      |   |
| AAT.ATT      | 4 | 43578069 | 43578086 | 6       | ENSSSCT00000006681  | MTERFD1    | intron     | 1.029  | .        | rs788429201 | 2      |   |
| AAAC.GTTT    | 4 | 43591461 | 43591491 | 7.75    | .                   | .          | intergenic | 0.229  | .        | rs790709224 | 4      |   |
| AT.AT        | 4 | 43817335 | 43817350 | 8       | .                   | .          | intergenic | .      | .        | .           | 3      |   |
| AAAG.CTTT    | 4 | 43882653 | 43882676 | 6       | .                   | .          | intergenic | 0.224  | rs345172 | rs7909      | 2      |   |
| AC.GT        | 4 | 43979497 | 43979525 | 14.5    | .                   | .          | intergenic | 0.099  | rs341456 | rs7919      | 2      |   |
| AAAG.CTTT    | 4 | 44015542 | 44015553 | 3       | .                   | .          | intergenic | 0.256  | .        | .           | 2      |   |
| AAAAT.ATTTT  | 4 | 44038683 | 44038712 | 6       | .                   | .          | intergenic | 0.251  | rs341073 | rs7895      | 2      |   |
| AAAT.ATTT    | 4 | 44242924 | 44242938 | 3.75    | .                   | .          | intergenic | -0.099 | .        | rs790738441 | 2      |   |
| AC.GT        | 4 | 44271790 | 44271803 | 7       | .                   | .          | intergenic | 0.046  | .        | .           | 2      |   |
| AT.AT        | 4 | 44272326 | 44272337 | 6       | .                   | .          | intergenic | 0.117  | .        | rs788693443 | 2      |   |
| AAAGAT.ATCTT | 4 | 44336116 | 44336157 | 7       | .                   | .          | intergenic | .      | .        | rs793076761 | 2      |   |
| AATG.CATT    | 4 | 44532519 | 44532540 | 5.5     | .                   | .          | intergenic | 0.054  | .        | rs792228113 | 2      |   |
| AAAAC.GTTTT  | 4 | 44870081 | 44870100 | 3.33333 | .                   | .          | intergenic | -0.009 | .        | rs788519154 | 2      |   |
| AC.GT        | 4 | 44877958 | 44877978 | 10.5    | ENSSSCT00000006684  | NDUFAF6    | intron     | 0.369  | rs383169 | rs7876      | 2      |   |
| AC.GT        | 4 | 45127601 | 45127611 | 5.5     | ENSSSCT00000006686  | CCNE2      | intron     | 0.226  | .        | rs790010408 | 2      |   |
| AC.GT        | 4 | 45176720 | 45176729 | 5       | ENSSSCT00000006687  | INTS8      | intron     | -0.004 | .        | rs788412807 | 3      |   |
| AAAC.GTTT    | 4 | 45189732 | 45189758 | 6.75    | ENSSSCT00000006687  | INTS8      | intron     | .      | rs116691 | rs7932      | 2      |   |
| AAT.ATT      | 4 | 46034038 | 46034050 | 4.33333 | .                   | .          | intergenic | 0.106  | .        | rs789521167 | 2      |   |
| AT.AT        | 4 | 46074249 | 46074258 | 5       | .                   | .          | intergenic | -0.166 | .        | .           | 2      |   |
| AG.CT        | 4 | 46232453 | 46232463 | 5.5     | .                   | .          | intergenic | 0.088  | .        | rs786770046 | 3      |   |
| AAT.ATT      | 4 | 46331794 | 46331814 | 7       | ENSSSCT00000006700  | .          | intron     | 0.152  | .        | rs788997259 | 2      |   |
| AAAT.ATTT    | 4 | 46362347 | 46362364 | 4.5     | .                   | .          | intergenic | 0.051  | .        | rs791219738 | 2      |   |
| ACAG.CTGT    | 4 | 46505875 | 46505903 | 7.25    | .                   | .          | intergenic | 0.131  | rs380786 | rs7901      | 3      |   |
| AC.GT        | 4 | 46750298 | 46750314 | 8.5     | .                   | .          | intergenic | 0.115  | .        | rs786865395 | 2      |   |
| AG.CT        | 4 | 46939282 | 46939295 | 7       | .                   | .          | intergenic | .      | rs318938 | rs7909      | 2      |   |
| AT.AT        | 4 | 47104399 | 47104416 | 9       | .                   | .          | intergenic | -0.075 | .        | rs791724381 | 2      |   |
| AG.CT        | 4 | 47105855 | 47105867 | 6.5     | .                   | .          | intergenic | -0.155 | .        | .           | 3      |   |
| AAAT.ATTT    | 4 | 47344755 | 47344773 | 4.75    | .                   | .          | intergenic | 0.152  | .        | rs793712730 | 2      |   |
| AAAC.GTTT    | 4 | 47383108 | 47383136 | 7.25    | .                   | .          | intergenic | -0.042 | rs220084 | rs7905      | 2      |   |
| AG.CT        | 4 | 47433666 | 47433676 | 5.5     | .                   | .          | intergenic | -0.051 | .        | rs791802128 | 3      |   |
| AAAAT.ATTTT  | 4 | 47460641 | 47460662 | 4.4     | .                   | .          | intergenic | -0.001 | .        | rs792512935 | 2      |   |
| AG.CT        | 4 | 47964247 | 47964275 | 14.5    | .                   | .          | intergenic | .      | .        | rs789585619 | 3      |   |
| AG.CT        | 4 | 48138205 | 48138217 | 6.5     | ENSSSCT00000006707  | RUNX1T1    | intron     | -0.186 | .        | rs709744200 | 4      |   |
| AC.GT        | 4 | 48144578 | 48144587 | 5       | ENSSSCT00000006707  | RUNX1T1    | intron     | 0.013  | rs205980 | rs7049      | 4      |   |
| AT.AT        | 4 | 48166242 | 48166252 | 5.5     | ENSSSCT00000006707  | RUNX1T1    | intron     | 0.056  | .        | .           | 4      |   |
| AAAT.ATTT    | 4 | 48170292 | 48170321 | 7.5     | ENSSSCT00000006707  | RUNX1T1    | intron     | -0.395 | rs389055 | rs7876      | 2      |   |
| ACT.AGT      | 4 | 48552964 | 48552975 | 4       | .                   | .          | intergenic | 0.029  | .        | rs790249038 | 2      |   |
| AT.AT        | 4 | 48707115 | 48707125 | 5.5     | .                   | .          | intergenic | 0.149  | .        | .           | 4      |   |
| AT.AT        | 4 | 48743372 | 48743383 | 6       | .                   | .          | intergenic | .      | .        | .           | 2      |   |
| AC.GT        | 4 | 49257055 | 49257078 | 12      | ENSSSCT00000006708  | SLC26A7    | intron     | 0.635  | rs158802 | rs7937      | 2      |   |
| AAAAC.GTTTT  | 4 | 49559309 | 49559329 | 4.2     | .                   | .          | intergenic | .      | .        | rs790535997 | 2      |   |
| AAC.GTT      | 4 | 50026945 | 50026968 | 8       | .                   | .          | intergenic | .      | rs395933 | rs7881      | 2      |   |
| AT.AT        | 4 | 50316884 | 50316901 | 9       | .                   | .          | intergenic | .      | rs775627 | rs7929      | 2      |   |
| AAAAC.GTTTT  | 4 | 50401989 | 50402009 | 4.2     | .                   | .          | intergenic | -0.168 | .        | rs788453395 | 2      |   |
| AG.CT        | 4 | 50416666 | 50416680 | 7.5     | .                   | .          | intergenic | .      | .        | .           | 3      |   |
| AT.AT        | 4 | 50949094 | 50949115 | 11      | .                   | .          | intergenic | -0.016 | .        | rs791752432 | 2      |   |
| AT.AT        | 4 | 50956826 | 50956849 | 12      | .                   | .          | intergenic | .      | .        | .           | 2      |   |
| AG.CT        | 4 | 51130755 | 51130769 | 7.5     | .                   | .          | intergenic | .      | rs110204 | rs7875      | 3      |   |
| AC.GT        | 4 | 51133369 | 51133404 | 18      | .                   | .          | intergenic | .      | rs775625 | rs7898      | 3      |   |
| AG.CT        | 4 | 51631785 | 51631799 | 7.5     | .                   | .          | intergenic | .      | .        | .           | 4      |   |
| AAAT.ATTT    | 4 | 51677915 | 51677937 | 5.75    | .                   | .          | intergenic | 0.223  | .        | rs712755880 | 2      |   |
| AAAC.GTTT    | 4 | 51704605 | 51704625 | 5.25    | .                   | .          | intergenic | 0.209  | .        | rs167225    | rs7896 | 2 |
| AAAG.CTTT    | 4 | 51853617 | 51853633 | 4.25    | .                   | .          | intergenic | 0.19   | .        | rs375373    | rs7891 | 2 |
| AG.CT        | 4 | 51948338 | 51948352 | 7.5     | .                   | .          | intergenic | 0.021  | .        | rs790058093 | 3      |   |
| AT.AT        | 4 | 52094379 | 52094388 | 5       | .                   | .          | intergenic | 0.11   | .        | rs786260529 | 2      |   |
| AG.CT        | 4 | 52205038 | 52205054 | 8.5     | .                   | .          | intergenic | .      | .        | rs791297126 | 2      |   |
| AAT.ATT      | 4 | 52210481 | 52210501 | 7       | .                   | .          | intergenic | .      | .        | .           | 4      |   |
| AT.AT        | 4 | 52220898 | 52220908 | 5.5     | .                   | .          | intergenic | -0.166 | .        | .           | 4      |   |
| AAT.ATT      | 4 | 52496082 | 52496098 | 5.66667 | .                   | .          | intergenic | .      | rs304290 | rs7904      | 2      |   |
| AG.CT        | 4 | 52612166 | 52612183 | 9       | .                   | .          | intergenic | .      | rs156301 | rs7874      | 3      |   |
| AT.AT        | 4 | 53401945 | 53401955 | 5.5     | .                   | .          | intergenic | 0.024  | .        | rs360901    | rs7898 | 3 |
| AT.AT        | 4 | 53712535 | 53712550 | 8       | .                   | .          | intergenic | 0.114  | .        | .           | 3      |   |
| AC.GT        | 4 | 53738246 | 53738255 | 5       | .                   | .          | intergenic | 0.243  | .        | .           | 4      |   |
| AC.GT        | 4 | 53749049 | 53749064 | 8       | .                   | .          | intergenic | -0.142 | .        | rs374123    | rs7864 | 2 |
| AAAT.ATTT    | 4 | 53969231 | 53969245 | 3.75    | .                   | .          | intergenic | 0.073  | .        | .           | 2      |   |
| AAAT.ATTT    | 4 | 53973927 | 53973944 | 4.5     | .                   | .          | intergenic | -0.009 | .        | rs384856    | rs7930 | 2 |
| AAC.GTT      | 4 | 54044706 | 54044734 | 9.66667 | .                   | .          | intergenic | .      | .        | rs382072    | rs7873 | 2 |
| AAAAC.GTTTT  | 4 | 54114918 | 54114942 | 5       | .                   | .          | intergenic | .      | .        | rs788456743 | 2      |   |
| AC.GT        | 4 | 54149246 | 54149260 | 7.5     | .                   | .          | intergenic | 0.086  | .        | rs390353    | rs7875 | 3 |
| AAAAC.GTTTT  | 4 | 54268685 | 54268718 | 6.8     | .                   | .          | intergenic | -0.041 | .        | rs323127    | rs7871 | 2 |
| AAC.GTT      | 4 | 54426683 | 54426699 | 5.66667 | .                   | .          | intergenic | .      | .        | rs389672    | rs7937 | 2 |



|              |   |          |          |         |                    |        |            |        |               |   |
|--------------|---|----------|----------|---------|--------------------|--------|------------|--------|---------------|---|
| AAAC.GTTT    | 4 | 55078005 | 55078018 | 3.5     | .                  | .      | intergenic | .      | rs789724700   | 2 |
| AATG.CATT    | 4 | 55155501 | 55155520 | 5       | ENSSSCT00000006727 | CNGB3  | intron     | 0.064  | rs790843583   | 2 |
| AAAT.ATTT    | 4 | 55157662 | 55157688 | 6.75    | ENSSSCT00000006727 | CNGB3  | intron     | .      | 52749 rs7884  | 2 |
| AT.AT        | 4 | 55185620 | 55185632 | 6.5     | .                  | .      | intergenic | 0.287  | 189872 rs7873 | 2 |
| AATG.CATT    | 4 | 55860336 | 55860357 | 5.5     | .                  | .      | intergenic | 0.057  | 578708 rs7897 | 2 |
| AAAC.GTTT    | 4 | 55949519 | 55949545 | 6.75    | .                  | .      | intergenic | 0.122  | rs788203272   | 2 |
| AAAG.CTTT    | 4 | 55984161 | 55984204 | 11      | .                  | .      | intergenic | 0.023  | rs791136500   | 2 |
| AG.CT        | 4 | 56001084 | 56001095 | 6       | .                  | .      | intergenic | 0.12   | 773140 rs7916 | 2 |
| AG.CT        | 4 | 56015911 | 56015931 | 10.5    | .                  | .      | intergenic | 0.074  | 142650 rs7891 | 4 |
| AC.GT        | 4 | 56106935 | 56106949 | 7.5     | .                  | .      | intergenic | -0.291 | rs790911834   | 2 |
| AC.GT        | 4 | 56261816 | 56261825 | 5       | .                  | .      | intergenic | -0.126 | .             | 2 |
| AT.AT        | 4 | 56263245 | 56263257 | 6.5     | .                  | .      | intergenic | -0.036 | 376790 rs7901 | 3 |
| AT.AT        | 4 | 56600940 | 56600950 | 5.5     | .                  | .      | intergenic | .      | rs788251980   | 3 |
| AT.AT        | 4 | 56710509 | 56710523 | 7.5     | .                  | .      | intergenic | .      | 104605 rs7878 | 2 |
| AAT.ATT      | 4 | 57013447 | 57013458 | 4       | ENSSSCT00000006742 | RALYL  | intron     | -0.142 | rs791625629   | 2 |
| AT.AT        | 4 | 57082420 | 57082429 | 5       | .                  | .      | intergenic | .      | rs790344886   | 3 |
| AT.AT        | 4 | 57511860 | 57511882 | 11.5    | ENSSSCT00000025498 | .      | intron     | .      | .             | 2 |
| AC.GT        | 4 | 57639890 | 57639907 | 9       | ENSSSCT00000025498 | .      | intron     | 0.086  | 297614 rs7869 | 5 |
| ACAT.ATGT    | 4 | 57656852 | 57656878 | 6.75    | ENSSSCT00000025498 | .      | intron     | 0.001  | rs792433616   | 3 |
| AC.GT        | 4 | 57665638 | 57665656 | 9.5     | ENSSSCT00000025498 | .      | intron     | .      | rs787007337   | 3 |
| AAAC.GTTT    | 4 | 57684527 | 57684549 | 5.75    | ENSSSCT00000025498 | .      | intron     | -0.134 | 541947 rs7870 | 4 |
| AAAC.GTTT    | 4 | 57724012 | 57724040 | 7.25    | .                  | .      | intergenic | -0.106 | rs786396229   | 2 |
| AC.GT        | 4 | 57732426 | 57732435 | 5       | .                  | .      | intergenic | 0.018  | .             | 2 |
| AAG.CTT      | 4 | 57987448 | 57987463 | 5.33333 | .                  | .      | intergenic | -0.088 | 131090 rs7895 | 2 |
| AT.AT        | 4 | 58085781 | 58085793 | 6.5     | .                  | .      | intergenic | .      | rs791606032   | 4 |
| AAAC.GTTT    | 4 | 58337761 | 58337775 | 3.75    | .                  | .      | intergenic | 0.025  | rs791064930   | 2 |
| AAC.GTT      | 4 | 58355022 | 58355038 | 5.66667 | .                  | .      | intergenic | -0.058 | 385054 rs7925 | 2 |
| AAAC.GTTT    | 4 | 58371649 | 58371665 | 4.25    | .                  | .      | intergenic | 0.012  | rs793001881   | 2 |
| AT.AT        | 4 | 58462164 | 58462181 | 9       | .                  | .      | intergenic | .      | rs793184789   | 2 |
| AG.CT        | 4 | 58651889 | 58651911 | 11.5    | .                  | .      | intergenic | .      | rs705920180   | 3 |
| AAC.GTT      | 4 | 58750908 | 58750922 | 5       | .                  | .      | intergenic | 0.034  | rs793132468   | 2 |
| AC.GT        | 4 | 59412646 | 59412658 | 6.5     | .                  | .      | intergenic | -0.029 | .             | 3 |
| AG.CT        | 4 | 59498453 | 59498463 | 5.5     | .                  | .      | intergenic | 0.11   | .             | 4 |
| AAAC.GTTT    | 4 | 59530054 | 59530070 | 4.25    | .                  | .      | intergenic | 0.12   | rs793469006   | 2 |
| AC.GT        | 4 | 59585451 | 59585473 | 11.5    | .                  | .      | intergenic | -0.098 | rs787508529   | 3 |
| AT.AT        | 4 | 59832080 | 59832097 | 9       | .                  | .      | intergenic | .      | .             | 2 |
| AAAC.GTTT    | 4 | 59928875 | 59928889 | 3.75    | .                  | .      | intergenic | 0.231  | 506142 rs7894 | 2 |
| ATCC.GGAT    | 4 | 60024777 | 60024804 | 7       | .                  | .      | intergenic | 0.12   | .             | 4 |
| AAAC.GTTT    | 4 | 60195697 | 60195723 | 6.75    | .                  | .      | intergenic | .      | rs790885019   | 2 |
| AG.CT        | 4 | 60468319 | 60468332 | 7       | .                  | .      | intergenic | -0.154 | 252769 rs7914 | 2 |
| AAAG.CTTT    | 4 | 60518388 | 60518409 | 5.5     | .                  | .      | intergenic | -0.152 | rs787386957   | 2 |
| ATC.GAT      | 4 | 61011876 | 61011891 | 5.33333 | .                  | .      | intergenic | -0.085 | .             | 3 |
| AC.GT        | 4 | 61019802 | 61019818 | 8.5     | .                  | .      | intergenic | -0.145 | 191323 rs7876 | 2 |
| AAAAT.ATTTT  | 4 | 61037904 | 61037926 | 4.6     | .                  | .      | intergenic | .      | rs788797221   | 2 |
| AAAC.GTTT    | 4 | 61247645 | 61247663 | 4.75    | .                  | .      | intergenic | 0.187  | 787072 rs7864 | 2 |
| AT.AT        | 4 | 61285500 | 61285511 | 6       | ENSSSCT00000029360 | ZBTB10 | intron     | 0.086  | rs790892746   | 2 |
| AT.AT        | 4 | 61285500 | 61285511 | 6       | ENSSSCT00000006749 | ZBTB10 | intron     | 0.086  | rs790892746   | 2 |
| AAAAT.ATTTT  | 4 | 61423307 | 61423327 | 4.2     | .                  | .      | intergenic | -0.205 | rs793543315   | 2 |
| AAAT.ATTT    | 4 | 61437964 | 61437978 | 3.75    | .                  | .      | intergenic | 0.182  | rs791870482   | 3 |
| AC.GT        | 4 | 61513928 | 61513942 | 7.5     | .                  | .      | intergenic | 0.182  | rs787090840   | 3 |
| AAAT.ATTT    | 4 | 61588718 | 61588740 | 5.75    | .                  | .      | intergenic | -0.021 | 309701 rs7916 | 2 |
| AAAT.ATTT    | 4 | 61735365 | 61735386 | 5.5     | .                  | .      | intergenic | -0.129 | 330648 rs7920 | 2 |
| AT.AT        | 4 | 61890316 | 61890343 | 14      | ENSSSCT00000006752 | MRPS28 | intron     | 0.023  | .             | 4 |
| AAAAT.ATTTT  | 4 | 62098055 | 62098077 | 4.6     | .                  | .      | intergenic | 0.046  | 289518 rs7914 | 2 |
| AC.GT        | 4 | 62220995 | 62221020 | 13      | ENSSSCT00000035189 | STMN2  | intron     | 0.592  | 516993 rs7922 | 2 |
| AC.GT        | 4 | 62220995 | 62221020 | 13      | ENSSSCT00000006754 | STMN2  | intron     | 0.592  | 516993 rs7922 | 2 |
| AC.GT        | 4 | 62220995 | 62221020 | 13      | ENSSSCT00000036553 | STMN2  | intron     | 0.592  | 516993 rs7922 | 2 |
| AC.GT        | 4 | 62220995 | 62221020 | 13      | ENSSSCT00000033041 | STMN2  | intron     | 0.592  | 516993 rs7922 | 2 |
| AC.GT        | 4 | 62220995 | 62221020 | 13      | ENSSSCT00000032694 | STMN2  | intron     | 0.592  | 516993 rs7922 | 2 |
| AAC.GTT      | 4 | 62262582 | 62262607 | 8.66667 | .                  | .      | intergenic | .      | 334921 rs7930 | 2 |
| AC.GT        | 4 | 62399801 | 62399812 | 6       | .                  | .      | intergenic | -0.085 | rs791950094   | 2 |
| AAAC.GTTT    | 4 | 62459737 | 62459755 | 4.75    | .                  | .      | intergenic | 0.008  | rs786649829   | 2 |
| AAT.ATT      | 4 | 62875252 | 62875266 | 5       | .                  | .      | intergenic | 0.04   | rs792171427   | 2 |
| AC.GT        | 4 | 63184517 | 63184549 | 16.5    | .                  | .      | intergenic | 0.038  | 510175 rs7889 | 4 |
| AG.CT        | 4 | 63250652 | 63250687 | 18      | .                  | .      | intergenic | 0.02   | rs706664001   | 2 |
| AT.AT        | 4 | 63357765 | 63357779 | 7.5     | .                  | .      | intergenic | 0.068  | rs788988351   | 2 |
| AC.GT        | 4 | 63401524 | 63401535 | 6       | .                  | .      | intergenic | -0.013 | rs786302516   | 2 |
| AAC.GTT      | 4 | 63412343 | 63412365 | 7.66667 | .                  | .      | intergenic | -0.121 | rs787333275   | 2 |
| AAAC.GTTT    | 4 | 63916707 | 63916730 | 6       | .                  | .      | intergenic | 0.156  | 187177 rs7921 | 3 |
| AAG.CTT      | 4 | 63955034 | 63955046 | 4.33333 | .                  | .      | intergenic | -0.179 | rs790508067   | 2 |
| AAC.GTT      | 4 | 63967983 | 63967995 | 4.33333 | .                  | .      | intergenic | .      | rs792591159   | 3 |
| AAAC.GTTT    | 4 | 63996959 | 63996973 | 3.75    | .                  | .      | intergenic | .      | rs788650448   | 2 |
| ACATAT.ATATG | 4 | 64205555 | 64205579 | 4.16667 | .                  | .      | intergenic | 1.795  | rs792986938   | 2 |
| AAAT.ATTT    | 4 | 64425202 | 64425221 | 5       | .                  | .      | intergenic | .      | rs791741543   | 2 |
| AAAT.ATTT    | 4 | 64435773 | 64435810 | 9.5     | .                  | .      | intergenic | 0.096  | rs787185404   | 2 |
| AC.GT        | 4 | 64445823 | 64445845 | 11.5    | .                  | .      | intergenic | 0.36   | .             | 2 |
| ACAT.ATGT    | 4 | 64484537 | 64484548 | 3       | .                  | .      | intergenic | -0.194 | .             | 2 |
| AG.CT        | 4 | 64550810 | 64550820 | 5.5     | .                  | .      | intergenic | -0.143 | rs792626519   | 2 |
| AAAC.GTTT    | 4 | 64577372 | 64577386 | 3.75    | .                  | .      | intergenic | .      | rs790975967   | 2 |
| AAAAT.ATTTT  | 4 | 64585784 | 64585810 | 5.4     | .                  | .      | intergenic | 0.081  | 539955 rs7883 | 2 |
| AT.AT        | 4 | 64633783 | 64633795 | 6.5     | .                  | .      | intergenic | 0.091  | rs787397896   | 3 |
| AAGG.CCTT    | 4 | 64641954 | 64641974 | 5.25    | .                  | .      | intergenic | 0.082  | 119271 rs7915 | 2 |
| AATT.AATT    | 4 | 64806944 | 64806965 | 5.5     | .                  | .      | intergenic | -0.217 | rs792760403   | 2 |
| AAAT.ATTT    | 4 | 64822127 | 64822151 | 6.25    | .                  | .      | intergenic | 0.267  | rs791639481   | 2 |

|             |   |          |          |         |                     |         |            |        |             |        |   |
|-------------|---|----------|----------|---------|---------------------|---------|------------|--------|-------------|--------|---|
| AT.AT       | 4 | 64937515 | 64937524 | 5       | ENSSSCT00000006763  | ZFXH4   | intron     | 0.074  | .           | .      | 4 |
| AC.GT       | 4 | 65258670 | 65258685 | 8       | .                   | .       | intergenic | 0.125  | 110744      | rs7881 | 2 |
| ACC.GGT     | 4 | 65592147 | 65592159 | 4.33333 | .                   | .       | intergenic | -0.081 | rs788446138 | .      | 2 |
| AC.GT       | 4 | 65995479 | 65995491 | 6.5     | .                   | .       | intergenic | 1.024  | rs790388685 | .      | 3 |
| AG.CT       | 4 | 66197460 | 66197472 | 6.5     | .                   | .       | intergenic | -0.025 | 358355      | rs7921 | 2 |
| AAAT.ATTT   | 4 | 66387498 | 66387511 | 3.5     | .                   | .       | intergenic | 0.175  | rs786514647 | .      | 2 |
| AC.GT       | 4 | 66517051 | 66517071 | 10.5    | .                   | .       | intergenic | -0.337 | .           | .      | 3 |
| AC.GT       | 4 | 66912417 | 66912426 | 5       | .                   | .       | intergenic | 0.631  | rs789713290 | .      | 2 |
| AT.AT       | 4 | 66958113 | 66958127 | 7.5     | .                   | .       | intergenic | .      | rs790060720 | .      | 2 |
| AC.GT       | 4 | 66998827 | 66998837 | 5.5     | .                   | .       | intergenic | 0.06   | rs792991092 | .      | 2 |
| AT.AT       | 4 | 67008794 | 67008804 | 5.5     | .                   | .       | intergenic | .      | rs787784436 | .      | 2 |
| AC.GT       | 4 | 67046214 | 67046230 | 8.5     | .                   | .       | intergenic | 0.13   | rs791001633 | .      | 3 |
| AAAC.GTTT   | 4 | 67103020 | 67103035 | 4       | .                   | .       | intergenic | .      | rs793363165 | .      | 2 |
| AC.GT       | 4 | 67149108 | 67149118 | 5.5     | .                   | .       | intergenic | 0.16   | rs792020106 | .      | 2 |
| AAAC.GTTT   | 4 | 67195843 | 67195864 | 5.5     | ENSSSCT00000006767  | GDAP1   | intron     | .      | rs792952822 | .      | 2 |
| AC.GT       | 4 | 67240957 | 67240977 | 10.5    | .                   | .       | intergenic | 0.114  | 764370      | rs7893 | 4 |
| AC.GT       | 4 | 67512177 | 67512199 | 11.5    | .                   | .       | intergenic | .      | 720554      | rs7938 | 5 |
| AAAT.ATTT   | 4 | 67596527 | 67596541 | 3.75    | .                   | .       | intergenic | .      | rs790873196 | .      | 2 |
| AC.GT       | 4 | 67597519 | 67597528 | 5       | .                   | .       | intergenic | -0.038 | .           | .      | 2 |
| AAAAC.GTTTT | 4 | 67630599 | 67630621 | 4.6     | ENSSSCT000000035167 | MD-2    | intron     | .      | rs793448898 | .      | 2 |
| AAAAC.GTTTT | 4 | 67630599 | 67630621 | 4.6     | ENSSSCT00000006769  | MD-2    | intron     | .      | rs793448898 | .      | 2 |
| AAAG.CTTT   | 4 | 67646001 | 67646019 | 4.75    | ENSSSCT00000006769  | MD-2    | intron     | 0.426  | rs792057885 | .      | 2 |
| AAAG.CTTT   | 4 | 67646001 | 67646019 | 4.75    | ENSSSCT000000035167 | MD-2    | intron     | 0.426  | rs792057885 | .      | 2 |
| AAAC.GTTT   | 4 | 67686701 | 67686729 | 7.25    | .                   | .       | intergenic | 0.208  | .           | .      | 2 |
| AC.GT       | 4 | 67689449 | 67689458 | 5       | ENSSSCT00000006770  | TCEB1   | promoter   | 0.319  | rs789254298 | .      | 2 |
| AAAT.ATTT   | 4 | 67765138 | 67765157 | 5       | ENSSSCT00000006771  | .       | intron     | 0.358  | rs791973344 | .      | 2 |
| AAT.ATT     | 4 | 67807958 | 67807970 | 4.33333 | .                   | .       | intergenic | .      | rs791378816 | .      | 2 |
| AAAC.GTTT   | 4 | 67814830 | 67814842 | 3.25    | .                   | .       | intergenic | -0.012 | .           | .      | 2 |
| AAAG.CTTT   | 4 | 67819354 | 67819366 | 3.25    | .                   | .       | intergenic | .      | .           | .      | 3 |
| AC.GT       | 4 | 67881440 | 67881454 | 7.5     | .                   | .       | intergenic | .      | rs789318612 | .      | 6 |
| AAAT.ATTT   | 4 | 67918929 | 67918948 | 5       | .                   | .       | intergenic | 0.054  | rs790690157 | .      | 2 |
| AG.CT       | 4 | 68106396 | 68106425 | 15      | .                   | .       | intergenic | 0.336  | rs787530036 | .      | 2 |
| AAAAC.GTTTT | 4 | 68126871 | 68126899 | 5.8     | .                   | .       | intergenic | .      | rs787622100 | .      | 2 |
| AC.GT       | 4 | 68565520 | 68565538 | 9.5     | .                   | .       | intergenic | 0.044  | 391419      | rs7882 | 3 |
| AT.AT       | 4 | 68589281 | 68589291 | 5.5     | .                   | .       | intergenic | .      | rs786336742 | .      | 2 |
| AAGG.CCTT   | 4 | 68836041 | 68836082 | 10.5    | .                   | .       | intergenic | .      | rs789480682 | .      | 2 |
| AT.AT       | 4 | 69253653 | 69253664 | 6       | ENSSSCT00000006780  | .       | intron     | 0.049  | 766862      | rs7914 | 2 |
| AAAAT.ATTTT | 4 | 69358023 | 69358039 | 3.4     | .                   | .       | intergenic | -0.306 | .           | .      | 2 |
| AC.GT       | 4 | 69383931 | 69383952 | 11      | .                   | .       | intergenic | .      | rs788057312 | .      | 4 |
| AAC.GTT     | 4 | 69501220 | 69501233 | 4.66667 | .                   | .       | intergenic | -0.218 | rs790937791 | .      | 2 |
| AGG.CCT     | 4 | 69581229 | 69581245 | 5.66667 | .                   | .       | intergenic | -0.281 | 28223       | rs7935 | 2 |
| AT.AT       | 4 | 69621226 | 69621235 | 5       | .                   | .       | intergenic | 0.59   | .           | .      | 2 |
| AAAT.ATTT   | 4 | 69823345 | 69823365 | 5.25    | .                   | .       | intergenic | 0.077  | rs787899194 | .      | 3 |
| AAAC.GTTT   | 4 | 69837097 | 69837115 | 4.75    | .                   | .       | intergenic | .      | rs789719638 | .      | 2 |
| AG.CT       | 4 | 69873988 | 69874002 | 7.5     | .                   | .       | intergenic | 0.452  | rs786759634 | .      | 3 |
| AT.AT       | 4 | 69885041 | 69885059 | 9.5     | .                   | .       | intergenic | 0.232  | rs786663566 | .      | 2 |
| AT.AT       | 4 | 70172233 | 70172249 | 8.5     | .                   | .       | intergenic | .      | rs788717871 | .      | 2 |
| AT.AT       | 4 | 70189172 | 70189183 | 6       | .                   | .       | intergenic | 0.015  | .           | .      | 3 |
| AC.GT       | 4 | 70234140 | 70234165 | 13      | .                   | .       | intergenic | .      | .           | .      | 4 |
| AAT.ATT     | 4 | 70352905 | 70352916 | 4       | ENSSSCT00000006786  | LACTB2  | intron     | 0.327  | .           | .      | 3 |
| AAAG.CTTT   | 4 | 70480592 | 70480609 | 4.5     | .                   | .       | intergenic | 0.322  | rs790631591 | .      | 2 |
| AAAG.CTTT   | 4 | 70982450 | 70982478 | 7.25    | .                   | .       | intergenic | 0.067  | 334581      | rs7916 | 2 |
| AAAC.GTTT   | 4 | 71012904 | 71012923 | 5       | .                   | .       | intergenic | .      | rs788684339 | .      | 2 |
| AAAC.GTTT   | 4 | 71232755 | 71232777 | 5.75    | ENSSSCT00000006791  | SLCO5A1 | intron     | 0.026  | rs790374917 | .      | 2 |
| AC.GT       | 4 | 71368951 | 71368966 | 8       | ENSSSCT00000006792  | SULF1   | intron     | -0.008 | 386263      | rs7908 | 2 |
| AC.GT       | 4 | 71396331 | 71396343 | 6.5     | ENSSSCT00000006792  | SULF1   | intron     | 0.211  | rs790567437 | .      | 2 |
| AC.GT       | 4 | 72033786 | 72033806 | 10.5    | .                   | .       | intergenic | .      | 371179      | rs7932 | 2 |
| AT.AT       | 4 | 72337357 | 72337366 | 5       | .                   | .       | intergenic | 0.085  | rs792302027 | .      | 2 |
| AT.AT       | 4 | 72564757 | 72564769 | 6.5     | .                   | .       | intergenic | 0.331  | 335116      | rs7900 | 2 |
| AAAC.GTTT   | 4 | 72579652 | 72579669 | 4.5     | .                   | .       | intergenic | 0.048  | rs789812612 | .      | 2 |
| AT.AT       | 4 | 72587082 | 72587100 | 9.5     | .                   | .       | intergenic | 0.364  | 353686      | rs7866 | 2 |
| AAAAC.GTTTT | 4 | 72625341 | 72625372 | 5.33333 | .                   | .       | intergenic | 0.047  | rs788973644 | .      | 2 |
| AAT.ATT     | 4 | 72632382 | 72632394 | 4.33333 | .                   | .       | intergenic | .      | .           | .      | 2 |
| AG.CT       | 4 | 73131717 | 73131728 | 6       | ENSSSCT000000034412 | CPA6    | intron     | 0.009  | rs787386044 | .      | 2 |
| AG.CT       | 4 | 73354788 | 73354797 | 5       | ENSSSCT00000006795  | CPA6    | intron     | 0.408  | rs705285566 | .      | 2 |
| AG.CT       | 4 | 73354788 | 73354797 | 5       | ENSSSCT000000034412 | CPA6    | intron     | 0.408  | rs705285566 | .      | 2 |
| AATT.AATT   | 4 | 73365748 | 73365761 | 3.5     | ENSSSCT00000006795  | CPA6    | intron     | .      | rs786854835 | .      | 2 |
| AATT.AATT   | 4 | 73365748 | 73365761 | 3.5     | ENSSSCT000000034412 | CPA6    | intron     | .      | rs786854835 | .      | 2 |
| ACAT.ATGT   | 4 | 73470743 | 73470761 | 4.75    | .                   | .       | intergenic | 0.01   | rs788317004 | .      | 2 |
| AG.CT       | 4 | 73481119 | 73481133 | 7.5     | .                   | .       | intergenic | -0.298 | rs793378025 | .      | 2 |
| AAAC.GTTT   | 4 | 73506788 | 73506807 | 5       | .                   | .       | intergenic | -0.049 | rs792239294 | .      | 3 |
| AC.GT       | 4 | 73652963 | 73652977 | 7.5     | ENSSSCT00000006796  | ARFGF1  | intron     | 0.044  | rs705284403 | .      | 3 |
| AC.GT       | 4 | 73652963 | 73652977 | 7.5     | ENSSSCT000000035957 | ARFGF1  | intron     | 0.044  | rs705284403 | .      | 3 |
| AT.AT       | 4 | 73923573 | 73923591 | 9.5     | ENSSSCT00000006800  | MCMDC2  | intron     | 0.368  | rs789966123 | .      | 2 |
| ACC.GGT     | 4 | 74373197 | 74373210 | 4.66667 | ENSSSCT000000032451 | C8orf46 | intron     | -0.047 | .           | .      | 2 |
| AAT.ATT     | 4 | 74493291 | 74493302 | 4       | .                   | .       | intergenic | .      | rs786390115 | .      | 2 |
| AC.GT       | 4 | 74630835 | 74630854 | 10      | .                   | .       | intergenic | 0.041  | 375808      | rs7888 | 2 |
| AT.AT       | 4 | 74961051 | 74961062 | 6       | .                   | .       | intergenic | 0.285  | rs792179032 | .      | 2 |
| AAAT.ATTT   | 4 | 75022732 | 75022748 | 4.25    | .                   | .       | intergenic | .      | rs791365378 | .      | 2 |
| AAAT.ATTT   | 4 | 75023101 | 75023123 | 5.75    | .                   | .       | intergenic | .      | rs788072529 | .      | 2 |
| AAAT.ATTT   | 4 | 75155499 | 75155520 | 5.5     | ENSSSCT00000006816  | ARMC1   | intron     | .      | rs790457173 | .      | 2 |
| AAAT.ATTT   | 4 | 75183321 | 75183350 | 7.5     | .                   | .       | intergenic | 0.7    | rs789367345 | .      | 2 |
| AAAG.CTTT   | 4 | 75717084 | 75717098 | 3.75    | .                   | .       | intergenic | 2.031  | rs788996072 | .      | 2 |
| AAAT.ATTT   | 4 | 75927713 | 75927738 | 6.5     | ENSSSCT000000031830 | .       | intron     | -0.018 | rs786386554 | .      | 4 |

|             |   |          |          |         |                    |       |            |        |               |   |
|-------------|---|----------|----------|---------|--------------------|-------|------------|--------|---------------|---|
| AAC.GTT     | 4 | 76000829 | 76000853 | 8.33333 | .                  | .     | intergenic | 0.846  | 396617 rs7867 | 2 |
| AATT.AATT   | 4 | 76031549 | 76031579 | 7.75    | .                  | .     | intergenic | 0.143  | rs791943543   | 2 |
| AAAAC.GTTTT | 4 | 76146136 | 76146155 | 4       | .                  | .     | intergenic | 0.235  | .             | 2 |
| AAAC.GTTT   | 4 | 76338094 | 76338117 | 6       | .                  | .     | intergenic | .      | rs790266601   | 2 |
| AG.CT       | 4 | 76542754 | 76542772 | 9.5     | .                  | .     | intergenic | 0.204  | 300038 rs7924 | 6 |
| AAAAC.GTTTT | 4 | 76776727 | 76776760 | 5.66667 | .                  | .     | intergenic | 0.156  | rs793551142   | 2 |
| AAAT.ATTT   | 4 | 76812951 | 76812965 | 3.75    | .                  | .     | intergenic | .      | 321914 rs7882 | 2 |
| AAGAG.CTCTT | 4 | 77185759 | 77185782 | 4.8     | .                  | .     | intergenic | 0.09   | rs792044911   | 2 |
| AG.CT       | 4 | 77362501 | 77362512 | 6       | .                  | .     | intergenic | 0.101  | rs790235620   | 3 |
| AG.CT       | 4 | 77387152 | 77387163 | 6       | .                  | .     | intergenic | 0.198  | 771388 rs7926 | 2 |
| AC.GT       | 4 | 77393689 | 77393705 | 8.5     | .                  | .     | intergenic | 0.038  | .             | 4 |
| AC.GT       | 4 | 77402946 | 77402961 | 8       | .                  | .     | intergenic | 0.015  | .             | 2 |
| AG.CT       | 4 | 77405499 | 77405515 | 8.5     | .                  | .     | intergenic | .      | rs697829498   | 3 |
| AAAAC.GTTTT | 4 | 77406742 | 77406767 | 5.2     | .                  | .     | intergenic | .      | rs793014921   | 2 |
| AT.AT       | 4 | 77718097 | 77718108 | 6       | .                  | .     | intergenic | .      | .             | 3 |
| AC.GT       | 4 | 77733984 | 77733994 | 5.5     | .                  | .     | intergenic | .      | .             | 2 |
| AAAG.CTTT   | 4 | 77791535 | 77791572 | 9.5     | ENSSSCT00000020920 | U6    | exon       | -0.006 | rs791274123   | 2 |
| AT.AT       | 4 | 78124810 | 78124819 | 5       | .                  | .     | intergenic | -0.073 | rs788986480   | 2 |
| AAAC.GTTT   | 4 | 78132090 | 78132122 | 8.25    | .                  | .     | intergenic | .      | 366805 rs7910 | 2 |
| AC.GT       | 4 | 78231685 | 78231695 | 5.5     | .                  | .     | intergenic | 0.096  | rs790134924   | 3 |
| AAT.ATT     | 4 | 78480311 | 78480332 | 7.33333 | ENSSSCT00000028806 | .     | intron     | -0.193 | rs790108025   | 2 |
| CATAT.ATATG | 4 | 78486494 | 78486513 | 3.33333 | ENSSSCT00000028806 | .     | intron     | 0.118  | rs791719738   | 2 |
| AAGG.CCTT   | 4 | 78498919 | 78498937 | 4.75    | ENSSSCT00000028806 | .     | intron     | 0.052  | 451822 rs7897 | 2 |
| AG.CT       | 4 | 78574050 | 78574062 | 6.5     | ENSSSCT00000006827 | CLVS1 | intron     | .      | .             | 2 |
| AAAC.GTTT   | 4 | 78590366 | 78590380 | 3.75    | ENSSSCT00000006827 | CLVS1 | intron     | 0.013  | rs792363867   | 2 |
| AAAT.ATTT   | 4 | 78630452 | 78630482 | 7.75    | ENSSSCT00000006827 | CLVS1 | intron     | 0.198  | .             | 2 |
| AAC.GTT     | 4 | 78662583 | 78662603 | 7       | .                  | .     | intergenic | 0.187  | rs787259919   | 2 |
| AAAT.ATTT   | 4 | 78806869 | 78806883 | 3.75    | .                  | .     | intergenic | 0.078  | .             | 2 |
| AGAT.ATCT   | 4 | 78853475 | 78853491 | 4.25    | .                  | .     | intergenic | -0.156 | rs791027929   | 2 |
| AATG.CATT   | 4 | 78930287 | 78930316 | 7.5     | .                  | .     | intergenic | 0.067  | rs786284797   | 2 |
| AAAC.GTTT   | 4 | 79062249 | 79062273 | 6.25    | ENSSSCT00000006828 | CHD7  | intron     | 0.006  | rs791777595   | 2 |
| AT.AT       | 4 | 79411781 | 79411797 | 8.5     | .                  | .     | intergenic | .      | rs793014430   | 2 |
| AG.CT       | 4 | 80254646 | 80254656 | 5.5     | .                  | .     | intergenic | -0.175 | rs787980390   | 2 |
| AT.AT       | 4 | 80257507 | 80257516 | 5       | .                  | .     | intergenic | 0.401  | rs792277190   | 2 |
| CAGAT.ATCTG | 4 | 80333863 | 80333890 | 4.66667 | .                  | .     | intergenic | -0.107 | .             | 2 |
| AAAC.GTTT   | 4 | 80756320 | 80756345 | 6.5     | ENSSSCT00000006832 | TOX   | promoter   | 0.448  | rs792492372   | 2 |
| AC.GT       | 4 | 81168813 | 81168825 | 6.5     | .                  | .     | intergenic | .      | rs793325325   | 2 |
| AAT.ATT     | 4 | 81244253 | 81244270 | 6       | .                  | .     | intergenic | 0.119  | rs788653026   | 2 |
| AAAAC.GTTTT | 4 | 81263103 | 81263119 | 3.4     | .                  | .     | intergenic | 0.307  | rs786865829   | 2 |
| AC.GT       | 4 | 81340467 | 81340479 | 6.5     | .                  | .     | intergenic | -0.001 | rs786375036   | 2 |
| AAAAC.GTTTT | 4 | 81496043 | 81496060 | 3.6     | .                  | .     | intergenic | -0.172 | rs791710636   | 2 |
| AAAC.GTTT   | 4 | 81568631 | 81568649 | 4.75    | .                  | .     | intergenic | -0.109 | rs792273484   | 2 |
| AAAAC.GTTTT | 4 | 81574908 | 81574927 | 4       | .                  | .     | intergenic | -0.22  | rs788878242   | 2 |
| AT.AT       | 4 | 81775446 | 81775455 | 5       | .                  | .     | intergenic | -0.047 | rs787849321   | 2 |
| AAAC.GTTT   | 4 | 81788301 | 81788323 | 5.75    | .                  | .     | intergenic | -0.168 | 353543 rs7867 | 2 |
| AAAT.ATTT   | 4 | 81925100 | 81925126 | 6.75    | .                  | .     | intergenic | .      | rs792528956   | 3 |
| AC.GT       | 4 | 82058963 | 82058975 | 6.5     | .                  | .     | intergenic | -0.01  | .             | 3 |
| AAC.GTT     | 4 | 82177263 | 82177282 | 6.66667 | .                  | .     | intergenic | -0.078 | 199044 rs7884 | 2 |
| AAT.ATT     | 4 | 82245326 | 82245346 | 7       | .                  | .     | intergenic | 0.099  | rs709999110   | 2 |
| AAT.ATT     | 4 | 82303988 | 82304004 | 5.66667 | .                  | .     | intergenic | 0.034  | rs790849375   | 4 |
| AAC.GTT     | 4 | 82305537 | 82305550 | 4.66667 | .                  | .     | intergenic | .      | rs791917291   | 2 |
| AAC.GTT     | 4 | 82340910 | 82340929 | 6.66667 | .                  | .     | intergenic | 0.114  | rs793449986   | 2 |
| AAAAC.GTTTT | 4 | 82434397 | 82434432 | 7.2     | .                  | .     | intergenic | 0.143  | rs792830818   | 2 |
| AAAC.GTTT   | 4 | 82519637 | 82519670 | 8.5     | .                  | .     | intergenic | 0.389  | rs787644951   | 2 |
| AAAC.GTTT   | 4 | 82546349 | 82546361 | 3.25    | .                  | .     | intergenic | -0.092 | rs792446379   | 2 |
| AAC.GTT     | 4 | 82708163 | 82708185 | 7.66667 | .                  | .     | intergenic | 0.082  | rs788756505   | 2 |
| AAAC.GTTT   | 4 | 82751583 | 82751596 | 3.5     | ENSSSCT00000006849 | LYN   | intron     | -0.002 | rs788920120   | 2 |
| AC.GT       | 4 | 82917915 | 82917926 | 6       | ENSSSCT00000006851 | .     | intron     | .      | rs790038123   | 3 |
| AAGC.GCTT   | 4 | 82928812 | 82928836 | 6.25    | ENSSSCT00000006851 | .     | intron     | 0.019  | .             | 4 |
| AAG.CTT     | 4 | 83041881 | 83041892 | 4       | .                  | .     | intergenic | 0.074  | 328454 rs7887 | 2 |
| AAAT.ATTT   | 4 | 83134114 | 83134137 | 6       | .                  | .     | intergenic | -0.001 | 318933 rs7907 | 4 |
| AT.AT       | 4 | 83232668 | 83232679 | 6       | .                  | .     | intergenic | -0.045 | 304627 rs7896 | 2 |
| AG.CT       | 4 | 83482960 | 83482973 | 7       | .                  | .     | intergenic | .      | rs793470337   | 4 |
| ACCT.AGGT   | 4 | 83614213 | 83614228 | 4       | .                  | .     | intergenic | 0.301  | .             | 3 |
| AC.GT       | 4 | 83774484 | 83774496 | 6.5     | .                  | .     | intergenic | 0.127  | .             | 4 |
| AAAC.GTTT   | 4 | 84049000 | 84049025 | 6.5     | .                  | .     | intergenic | -0.235 | rs787168752   | 2 |
| AAAT.ATTT   | 4 | 84101210 | 84101225 | 4       | .                  | .     | intergenic | -0.019 | 320020 rs7887 | 2 |
| AAT.ATT     | 4 | 84433036 | 84433057 | 7.33333 | .                  | .     | intergenic | 0.085  | .             | 2 |
| AG.CT       | 4 | 84503313 | 84503324 | 6       | .                  | .     | intergenic | -0.235 | rs787908390   | 2 |
| AAAC.GTTT   | 4 | 84633110 | 84633124 | 3.75    | .                  | .     | intergenic | -0.02  | rs788378730   | 2 |
| AT.AT       | 4 | 85011277 | 85011291 | 7.5     | .                  | .     | intergenic | 0.038  | .             | 2 |
| AC.GT       | 4 | 85011358 | 85011372 | 7.5     | .                  | .     | intergenic | 0.062  | rs792808921   | 2 |
| AAAG.CTTT   | 4 | 85266985 | 85267013 | 7.25    | .                  | .     | intergenic | .      | rs792680446   | 2 |
| AC.GT       | 4 | 85424877 | 85424888 | 6       | .                  | .     | intergenic | 0.067  | .             | 4 |
| AAACT.AGTTT | 4 | 85624382 | 85624402 | 4.2     | .                  | .     | intergenic | -0.03  | 355508 rs7880 | 2 |
| AC.GT       | 4 | 85624920 | 85624929 | 5       | .                  | .     | intergenic | -0.141 | rs793710280   | 2 |
| AT.AT       | 4 | 86509775 | 86509784 | 5       | .                  | .     | intergenic | 0.078  | rs790849629   | 2 |
| AG.CT       | 4 | 86510924 | 86510935 | 6       | .                  | .     | intergenic | 0.078  | rs787543531   | 2 |
| AC.GT       | 4 | 86680384 | 86680394 | 5.5     | ENSSSCT00000006869 | SNAI2 | cds        | 1.388  | .             | 2 |
| AC.GT       | 4 | 86768973 | 86768993 | 10.5    | .                  | .     | intergenic | 0.522  | .             | 2 |
| AAATG.CATTT | 4 | 87013290 | 87013308 | 3.8     | .                  | .     | intergenic | 0      | rs788681442   | 2 |
| AAG.CTT     | 4 | 87329329 | 87329340 | 4       | ENSSSCT00000006873 | PRKDC | intron     | 0.077  | rs790470818   | 2 |
| AC.GT       | 4 | 87549352 | 87549371 | 10      | ENSSSCT00000006876 | SPIDR | intron     | 0.297  | rs790259410   | 2 |
| AAAC.GTTT   | 4 | 87823194 | 87823210 | 4.25    | .                  | .     | intergenic | .      | .             | 4 |

|              |   |          |          |         |                    |          |            |        |               |   |
|--------------|---|----------|----------|---------|--------------------|----------|------------|--------|---------------|---|
| AT.AT        | 4 | 88031336 | 88031346 | 5.5     | .                  | .        | intergenic | -0.033 | .             | 2 |
| AAAC.GTTT    | 4 | 88108869 | 88108889 | 5.25    | .                  | .        | intergenic | 0.137  | rs787714106   | 2 |
| AG.CT        | 4 | 88417235 | 88417244 | 5       | .                  | .        | intergenic | -0.072 | rs789065087   | 3 |
| AAAAAT.ATTTT | 4 | 88468842 | 88468861 | 3.33333 | .                  | .        | intergenic | .      | .             | 2 |
| AAC.GTT      | 4 | 88622432 | 88622446 | 5       | ENSSSCT0000006882  | KIFAP3   | intron     | 0.104  | .             | 2 |
| AAAAC.GTTTT  | 4 | 88754552 | 88754570 | 3.8     | .                  | .        | intergenic | .      | rs791632931   | 2 |
| AT.AT        | 4 | 88811832 | 88811860 | 14.5    | ENSSSCT0000006884  | C1orf112 | intron     | 0.092  | rs793683184   | 2 |
| AATG.CATT    | 4 | 88811992 | 88812008 | 4.25    | ENSSSCT0000006884  | C1orf112 | intron     | 0.19   | .             | 2 |
| AT.AT        | 4 | 88822704 | 88822728 | 12.5    | ENSSSCT0000006884  | C1orf112 | intron     | 0.309  | rs791128782   | 3 |
| AAG.CTT      | 4 | 88991797 | 88991808 | 4       | ENSSSCT0000006891  | SELP     | intron     | 0.082  | rs789359555   | 2 |
| AAG.CTT      | 4 | 88991797 | 88991808 | 4       | ENSSSCT00000036036 | SELP     | intron     | 0.082  | rs789359555   | 2 |
| AAAT.ATTT    | 4 | 88993023 | 88993041 | 4.75    | ENSSSCT0000006891  | SELP     | intron     | 0.119  | rs790854616   | 2 |
| AAAT.ATTT    | 4 | 88993023 | 88993041 | 4.75    | ENSSSCT00000036036 | SELP     | intron     | 0.119  | rs790854616   | 2 |
| AAT.ATT      | 4 | 89012472 | 89012483 | 4       | ENSSSCT00000036036 | SELP     | intron     | 0.13   | .             | 2 |
| AAT.ATT      | 4 | 89012472 | 89012483 | 4       | ENSSSCT0000006891  | SELP     | intron     | 0.13   | .             | 2 |
| AAT.ATT      | 4 | 89012472 | 89012483 | 4       | ENSSSCT00000035164 | SELP     | intron     | 0.13   | .             | 2 |
| AAAAAT.ATTTT | 4 | 89335165 | 89335192 | 4.66667 | ENSSSCT0000006898  | NME7     | intron     | -0.048 | rs790334025   | 2 |
| AAAC.GTTT    | 4 | 89409028 | 89409051 | 6       | .                  | .        | intergenic | .      | 345362 rs7868 | 2 |
| AC.GT        | 4 | 89415724 | 89415746 | 11.5    | .                  | .        | intergenic | .      | rs793762164   | 7 |
| AAAAC.GTTTT  | 4 | 89471891 | 89471912 | 4.4     | .                  | .        | intergenic | .      | rs792925704   | 2 |
| AG.CT        | 4 | 89477755 | 89477771 | 8.5     | .                  | .        | intergenic | .      | rs790076869   | 2 |
| AAAAT.ATTTT  | 4 | 89506804 | 89506821 | 3.6     | .                  | .        | intergenic | .      | rs791313268   | 2 |
| AC.GT        | 4 | 89587013 | 89587033 | 10.5    | .                  | .        | intergenic | .      | .             | 2 |
| AAAAT.ATTTT  | 4 | 89738240 | 89738263 | 4.8     | .                  | .        | intergenic | .      | 368063 rs7894 | 2 |
| AAAT.ATTT    | 4 | 89738446 | 89738460 | 3.75    | .                  | .        | intergenic | -0.044 | rs792172536   | 2 |
| AT.AT        | 4 | 89945509 | 89945525 | 8.5     | .                  | .        | intergenic | -0.079 | .             | 2 |
| AAC.GTT      | 4 | 90091399 | 90091413 | 5       | .                  | .        | intergenic | -0.113 | rs713488607   | 3 |
| AAAAG.CTTTT  | 4 | 90258733 | 90258753 | 4.2     | .                  | .        | intergenic | .      | rs793090798   | 2 |
| AAAC.GTTT    | 4 | 90376294 | 90376305 | 3       | .                  | .        | intergenic | .      | rs791091989   | 2 |
| AAC.GTT      | 4 | 90487976 | 90487996 | 7       | .                  | .        | intergenic | 0.188  | .             | 2 |
| AAAT.ATTT    | 4 | 90768058 | 90768076 | 4.75    | .                  | .        | intergenic | 0.218  | rs789927264   | 2 |
| AAAG.CTTT    | 4 | 90796553 | 90796572 | 5       | ENSSSCT0000006910  | ADCY10   | intron     | 0.015  | rs793058620   | 2 |
| AAAAC.GTTTT  | 4 | 90864021 | 90864051 | 6.2     | ENSSSCT0000006910  | ADCY10   | intron     | -0.392 | rs788313252   | 2 |
| AAG.CTT      | 4 | 90914520 | 90914535 | 5.33333 | ENSSSCT0000006911  | MPZL1    | intron     | 0.004  | rs793008061   | 2 |
| AATT.AATT    | 4 | 90998901 | 90998926 | 6.5     | ENSSSCT0000006912  | RCSD1    | 3'utr      | -0.12  | rs792027788   | 2 |
| AAAT.ATTT    | 4 | 91091752 | 91091772 | 5.25    | .                  | .        | intergenic | .      | rs793303659   | 3 |
| AAG.CTT      | 4 | 91265549 | 91265566 | 6       | .                  | .        | intergenic | 0.46   | 394951 rs7921 | 2 |
| AAAC.GTTT    | 4 | 91517032 | 91517059 | 7       | .                  | .        | intergenic | -0.037 | rs788653903   | 4 |
| AC.GT        | 4 | 91715067 | 91715091 | 12.5    | ENSSSCT0000006923  | .        | promoter   | .      | rs787988874   | 2 |
| AAAT.ATTT    | 4 | 91721044 | 91721061 | 4.5     | ENSSSCT0000006923  | .        | intron     | .      | rs788539225   | 2 |
| AAC.GTT      | 4 | 91737496 | 91737509 | 4.66667 | .                  | .        | intergenic | .      | rs787976200   | 2 |
| AG.CT        | 4 | 91910871 | 91910882 | 6       | ENSSSCT0000006926  | POGK     | intron     | 0.779  | rs788601207   | 3 |
| AT.AT        | 4 | 91930446 | 91930474 | 14.5    | .                  | .        | intergenic | 0.164  | .             | 2 |
| AGG.CCT      | 4 | 92268259 | 92268271 | 4.33333 | .                  | .        | intergenic | .      | 39846 rs7915  | 2 |
| AAT.ATT      | 4 | 92336124 | 92336144 | 7       | ENSSSCT0000006928  | FAM78B   | intron     | .      | rs787539666   | 2 |
| AAAT.ATTT    | 4 | 92628290 | 92628324 | 8.75    | ENSSSCT0000006931  | TMCO1    | intron     | 0.109  | rs793081998   | 2 |
| AT.AT        | 4 | 92661199 | 92661208 | 5       | ENSSSCT0000006931  | TMCO1    | intron     | 0.172  | .             | 4 |
| AAC.GTT      | 4 | 92664872 | 92664897 | 8.66667 | ENSSSCT0000006931  | TMCO1    | intron     | -0.029 | .             | 2 |
| AC.GT        | 4 | 92857935 | 92857946 | 6       | ENSSSCT00000027133 | LRR52    | intron     | 0.046  | .             | 3 |
| AAAAT.ATTTT  | 4 | 92963272 | 92963290 | 3.8     | .                  | .        | intergenic | 0.107  | rs792607926   | 2 |
| AAAT.ATTT    | 4 | 92971174 | 92971201 | 7       | .                  | .        | intergenic | 0.404  | 159936 rs7913 | 2 |
| AAT.ATT      | 4 | 93035849 | 93035863 | 5       | ENSSSCT0000006936  | RXRG     | intron     | -0.003 | rs786470010   | 2 |
| AAT.ATT      | 4 | 93035849 | 93035863 | 5       | ENSSSCT00000033501 | RXRG     | intron     | -0.003 | rs786470010   | 2 |
| AT.AT        | 4 | 93105835 | 93105844 | 5       | .                  | .        | intergenic | 0      | rs791034991   | 2 |
| AC.GT        | 4 | 93175685 | 93175696 | 6       | .                  | .        | intergenic | 0.115  | .             | 2 |
| AC.GT        | 4 | 93223485 | 93223497 | 6.5     | .                  | .        | intergenic | -0.006 | rs790582539   | 2 |
| AAAC.GTTT    | 4 | 93321105 | 93321125 | 5.25    | .                  | .        | intergenic | .      | rs787804878   | 2 |
| AAAAT.ATTTT  | 4 | 93353587 | 93353610 | 4.8     | .                  | .        | intergenic | .      | rs793539293   | 2 |
| AAAT.ATTT    | 4 | 93548383 | 93548406 | 6       | .                  | .        | intergenic | -0.147 | 39117 rs7901  | 2 |
| AATC.GATT    | 4 | 93960329 | 93960351 | 5.75    | .                  | .        | intergenic | 0.253  | rs790060932   | 2 |
| AT.AT        | 4 | 93966186 | 93966197 | 6       | .                  | .        | intergenic | 0.028  | rs787565532   | 2 |
| AG.CT        | 4 | 93971442 | 93971451 | 5       | .                  | .        | intergenic | -0.067 | rs790219847   | 2 |
| AC.GT        | 4 | 93982967 | 93982977 | 5.5     | .                  | .        | intergenic | .      | 151522 rs7873 | 2 |
| AT.AT        | 4 | 93993864 | 93993874 | 5.5     | .                  | .        | intergenic | -0.105 | rs789464046   | 2 |
| AC.GT        | 4 | 94036235 | 94036245 | 5.5     | .                  | .        | intergenic | 0.617  | .             | 3 |
| AT.AT        | 4 | 94374878 | 94374888 | 5.5     | .                  | .        | intergenic | .      | rs793425999   | 2 |
| AG.CT        | 4 | 94415681 | 94415708 | 14      | .                  | .        | intergenic | 1.47   | rs788598611   | 5 |
| AAAT.ATTT    | 4 | 94422436 | 94422454 | 4.75    | .                  | .        | intergenic | -0.068 | rs786568166   | 2 |
| AC.GT        | 4 | 94467880 | 94467894 | 7.5     | .                  | .        | intergenic | -0.04  | 395133 rs7866 | 2 |
| AAAC.GTTT    | 4 | 94489927 | 94489946 | 5       | .                  | .        | intergenic | 0.002  | 341726 rs7910 | 3 |
| AT.AT        | 4 | 94671909 | 94671924 | 8       | .                  | .        | intergenic | .      | 321804 rs7928 | 2 |
| AAAC.GTTT    | 4 | 94747557 | 94747568 | 3       | .                  | .        | intergenic | 0.009  | rs787352350   | 2 |
| AT.AT        | 4 | 94753511 | 94753520 | 5       | .                  | .        | intergenic | 0.027  | rs792789597   | 2 |
| AAAC.GTTT    | 4 | 94771725 | 94771763 | 9.75    | .                  | .        | intergenic | 0.211  | 394735 rs7937 | 2 |
| AC.GT        | 4 | 94896356 | 94896370 | 7.5     | ENSSSCT0000006941  | NUF2     | intron     | .      | rs786726779   | 2 |
| AAAAG.CTTTT  | 4 | 95042931 | 95042958 | 5.6     | ENSSSCT0000006942  | RGS5     | intron     | 0.038  | 358224 rs7912 | 2 |
| AC.GT        | 4 | 95052713 | 95052723 | 5.5     | ENSSSCT0000006942  | RGS5     | 3'utr      | 0.098  | 182135 rs7917 | 4 |
| AAAAG.CTTTT  | 4 | 95093878 | 95093899 | 3.66667 | .                  | .        | intergenic | .      | 703994 rs7864 | 2 |
| AAAC.GTTT    | 4 | 95182097 | 95182129 | 8.25    | .                  | .        | intergenic | -0.114 | rs787847532   | 2 |
| AAAC.GTTT    | 4 | 95337025 | 95337058 | 8.5     | .                  | .        | intergenic | .      | rs695474459   | 2 |
| AC.GT        | 4 | 95372204 | 95372213 | 5       | .                  | .        | intergenic | 0.057  | .             | 3 |
| AAC.GTT      | 4 | 95457929 | 95457949 | 7       | .                  | .        | intergenic | -0.031 | rs789313766   | 2 |
| AT.AT        | 4 | 95495137 | 95495156 | 10      | .                  | .        | intergenic | .      | rs789035432   | 2 |
| AC.GT        | 4 | 95702637 | 95702652 | 8       | .                  | .        | intergenic | -0.258 | 342812 rs7927 | 2 |

|               |   |           |           |         |                    |          |            |        |             |   |
|---------------|---|-----------|-----------|---------|--------------------|----------|------------|--------|-------------|---|
| AC.GT         | 4 | 95970588  | 95970599  | 6       | .                  | .        | intergenic | .      | rs7918      | 2 |
| AT.AT         | 4 | 96194910  | 96194920  | 5.5     | .                  | .        | intergenic | .      | rs7926      | 2 |
| AT.AT         | 4 | 96275614  | 96275623  | 5       | .                  | .        | intergenic | 0.006  | rs792968449 | 2 |
| AC.GT         | 4 | 96302958  | 96302968  | 5.5     | .                  | .        | intergenic | -0.135 | .           | 3 |
| AC.GT         | 4 | 96522030  | 96522043  | 7       | .                  | .        | intergenic | -0.239 | rs7866      | 2 |
| AAT.ATT       | 4 | 96868587  | 96868603  | 5.66667 | ENSSSCT0000006957  | .        | intron     | -0.038 | rs7882      | 2 |
| AG.CT         | 4 | 96901669  | 96901713  | 22.5    | ENSSSCT00000033832 | CD32     | intron     | -0.348 | rs7897      | 4 |
| AG.CT         | 4 | 96901669  | 96901713  | 22.5    | ENSSSCT00000033848 | CD32     | intron     | -0.348 | rs7897      | 4 |
| AG.CT         | 4 | 96901669  | 96901713  | 22.5    | ENSSSCT0000006958  | CD32     | intron     | -0.348 | rs7897      | 4 |
| AG.CT         | 4 | 96901669  | 96901713  | 22.5    | ENSSSCT00000033401 | CD32     | intron     | -0.348 | rs7897      | 4 |
| AG.CT         | 4 | 96901669  | 96901713  | 22.5    | ENSSSCT0000006959  | CD32     | intron     | -0.348 | rs7897      | 4 |
| AG.CT         | 4 | 96901669  | 96901713  | 22.5    | ENSSSCT00000031531 | CD32     | intron     | -0.348 | rs7897      | 4 |
| AG.CT         | 4 | 96901669  | 96901713  | 22.5    | ENSSSCT00000035271 | CD32     | intron     | -0.348 | rs7897      | 4 |
| AT.AT         | 4 | 97056643  | 97056656  | 7       | .                  | .        | intergenic | .      | .           | 3 |
| AC.GT         | 4 | 97330624  | 97330638  | 7.5     | ENSSSCT0000006979  | F11R     | intron     | .      | rs712139257 | 2 |
| AC.GT         | 4 | 97330624  | 97330638  | 7.5     | ENSSSCT00000033820 | F11R     | intron     | .      | rs712139257 | 2 |
| AC.GT         | 4 | 97355223  | 97355238  | 8       | .                  | .        | intergenic | .      | rs7871      | 3 |
| AC.GT         | 4 | 97370994  | 97371003  | 5       | .                  | .        | intergenic | -0.019 | rs787426485 | 2 |
| AAAT.ATTT     | 4 | 97532675  | 97532693  | 4.75    | ENSSSCT00000034681 | LY9      | intron     | 0.078  | rs793218981 | 2 |
| AAAT.ATTT     | 4 | 97532675  | 97532693  | 4.75    | ENSSSCT0000006986  | LY9      | intron     | 0.078  | rs793218981 | 2 |
| AAAT.ATTT     | 4 | 97532675  | 97532693  | 4.75    | ENSSSCT00000036000 | LY9      | intron     | 0.078  | rs793218981 | 2 |
| AAGG.CCTT     | 4 | 97622363  | 97622380  | 4.5     | ENSSSCT0000006984  | .        | promoter   | .      | rs7091      | 2 |
| AC.GT         | 4 | 97737192  | 97737205  | 7       | .                  | .        | intergenic | 0.223  | rs7892      | 4 |
| AT.AT         | 4 | 98734458  | 98734468  | 5.5     | .                  | .        | intergenic | 0.198  | rs787290926 | 2 |
| ACC.GGT       | 4 | 98928833  | 98928852  | 6.66667 | .                  | .        | intergenic | -0.059 | rs791774658 | 2 |
| AAAAC.GTTTT   | 4 | 98961477  | 98961503  | 5.4     | .                  | .        | intergenic | -0.317 | rs786360782 | 2 |
| AC.GT         | 4 | 99054937  | 99054968  | 16      | .                  | .        | intergenic | -0.046 | .           | 2 |
| AAAC.GTTT     | 4 | 99064897  | 99064911  | 3.75    | .                  | .        | intergenic | .      | rs791217755 | 2 |
| AC.GT         | 4 | 99134239  | 99134249  | 5.5     | .                  | .        | intergenic | -0.067 | .           | 3 |
| AG.CT         | 4 | 99365376  | 99365390  | 7.5     | .                  | .        | intergenic | -0.221 | rs788673186 | 3 |
| AAAT.ATTT     | 4 | 99529983  | 99530004  | 5.5     | .                  | .        | intergenic | 0.048  | rs791486968 | 2 |
| AT.AT         | 4 | 99540169  | 99540179  | 5.5     | .                  | .        | intergenic | .      | rs792580102 | 2 |
| AAAC.GTTT     | 4 | 100458847 | 100458861 | 3.75    | ENSSSCT00000035228 | CD1D     | intron     | .      | rs787616185 | 2 |
| AC.GT         | 4 | 100541776 | 100541789 | 7       | ENSSSCT00000033538 | KIRREL   | intron     | -0.212 | .           | 2 |
| AC.GT         | 4 | 100541776 | 100541789 | 7       | ENSSSCT0000007068  | KIRREL   | intron     | -0.212 | .           | 2 |
| AC.GT         | 4 | 100541776 | 100541789 | 7       | ENSSSCT00000036287 | KIRREL   | intron     | -0.212 | .           | 2 |
| AAAC.GTTT     | 4 | 100711556 | 100711584 | 7.25    | .                  | .        | intergenic | -0.036 | rs694080126 | 2 |
| AG.CT         | 4 | 100825631 | 100825645 | 7.5     | ENSSSCT0000007074  | FCRL3    | intron     | .      | rs7905      | 2 |
| AAG.CTT       | 4 | 101034488 | 101034501 | 4.66667 | .                  | .        | intergenic | .      | rs7876      | 2 |
| AAAAAT.ATTTTT | 4 | 101518025 | 101518045 | 3.5     | ENSSSCT0000007078  | ARHGEF11 | intron     | -0.015 | rs790652761 | 2 |
| AC.GT         | 4 | 101557538 | 101557549 | 6       | ENSSSCT0000007078  | ARHGEF11 | intron     | -0.108 | rs792463940 | 2 |
| AAAC.GTTT     | 4 | 101788297 | 101788325 | 7.25    | .                  | .        | intergenic | -0.207 | rs789472489 | 2 |
| AT.AT         | 4 | 101871516 | 101871531 | 8       | ENSSSCT0000007084  | PRCC     | intron     | 0.257  | rs792310514 | 3 |
| AAAAC.GTTTT   | 4 | 101983084 | 101983105 | 4.4     | ENSSSCT0000007091  | .        | promoter   | -0.034 | rs7887      | 2 |
| AAAAC.GTTTT   | 4 | 101983084 | 101983105 | 4.4     | ENSSSCT00000027298 | .        | promoter   | -0.034 | rs7887      | 2 |
| AAAAC.GTTTT   | 4 | 101983084 | 101983105 | 4.4     | ENSSSCT00000031509 | .        | promoter   | -0.034 | rs7887      | 2 |
| AAAC.GTTT     | 4 | 102189331 | 102189353 | 5.75    | .                  | .        | intergenic | .      | rs792899737 | 2 |
| AAAAC.GTTTT   | 4 | 102264266 | 102264298 | 5.5     | .                  | .        | intergenic | -0.189 | rs787642295 | 2 |
| AAAC.GTTT     | 4 | 102424923 | 102424950 | 7       | .                  | .        | intergenic | .      | .           | 3 |
| AAAAT.ATTTT   | 4 | 102441185 | 102441206 | 4.4     | ENSSSCT0000007106  | CCT3     | intron     | 0.086  | rs790235469 | 2 |
| AG.CT         | 4 | 102472088 | 102472098 | 5.5     | ENSSSCT0000007109  | SMG5     | intron     | 0.239  | rs7937      | 3 |
| AAC.GTT       | 4 | 102908819 | 102908833 | 5       | ENSSSCT00000028079 | .        | intron     | 0.099  | rs792003574 | 4 |
| AC.GT         | 4 | 103367631 | 103367644 | 7       | ENSSSCT0000007143  | GBA      | intron     | -0.215 | rs791456973 | 2 |
| AAC.GTT       | 4 | 103368694 | 103368710 | 5.66667 | ENSSSCT0000007143  | GBA      | intron     | .      | rs792493183 | 4 |
| AAAC.GTTT     | 4 | 103719802 | 103719820 | 4.75    | ENSSSCT0000007166  | KCNN3    | intron     | -0.226 | rs7893      | 2 |
| AAAC.GTTT     | 4 | 103867239 | 103867253 | 3.75    | ENSSSCT0000007166  | KCNN3    | intron     | -0.075 | rs788048366 | 2 |
| AC.GT         | 4 | 104029472 | 104029481 | 5       | ENSSSCT0000007170  | CHRN2    | intron     | -0.023 | rs788715561 | 3 |
| AAAT.ATTT     | 4 | 104524511 | 104524533 | 5.75    | .                  | .        | intergenic | .      | rs789048763 | 2 |
| AT.AT         | 4 | 104552053 | 104552077 | 12.5    | .                  | .        | intergenic | 0.937  | rs787940527 | 3 |
| AAAAT.ATTTT   | 4 | 104566884 | 104566899 | 3.2     | .                  | .        | intergenic | 0.604  | rs787923303 | 2 |
| AC.GT         | 4 | 104726401 | 104726417 | 8.5     | ENSSSCT0000007189  | GATAD2B  | intron     | .      | rs788246383 | 2 |
| AG.CT         | 4 | 105028813 | 105028823 | 5.5     | .                  | .        | intergenic | .      | rs791150422 | 2 |
| AAAC.GTTT     | 4 | 105204768 | 105204782 | 3.75    | ENSSSCT00000030953 | PGLYRP3  | intron     | .      | rs7903      | 2 |
| AG.CT         | 4 | 105471617 | 105471627 | 5.5     | .                  | .        | intergenic | .      | rs704917131 | 2 |
| AG.CT         | 4 | 105675766 | 105675777 | 6       | .                  | .        | intergenic | .      | rs787287577 | 2 |
| AAAAC.GTTTT   | 4 | 105681763 | 105681787 | 5       | .                  | .        | intergenic | -0.009 | rs786222043 | 2 |
| AG.CT         | 4 | 105705992 | 105706019 | 14      | .                  | .        | intergenic | 0.12   | rs7875      | 2 |
| AT.AT         | 4 | 106066459 | 106066468 | 5       | .                  | .        | intergenic | .      | .           | 4 |
| AG.CT         | 4 | 106091412 | 106091423 | 6       | .                  | .        | intergenic | 0.02   | rs789665474 | 2 |
| AG.CT         | 4 | 106122980 | 106122994 | 7.5     | .                  | .        | intergenic | 0.094  | rs7864      | 2 |
| AAAC.GTTT     | 4 | 106267788 | 106267802 | 3.75    | .                  | .        | intergenic | 0.029  | rs7920      | 2 |
| AAAC.GTTT     | 4 | 106586230 | 106586247 | 4.5     | .                  | .        | intergenic | 0.281  | rs789902976 | 2 |
| AT.AT         | 4 | 106664459 | 106664468 | 5       | ENSSSCT0000007253  | SNX27    | promoter   | 0.683  | .           | 3 |
| AG.CT         | 4 | 106674642 | 106674652 | 5.5     | ENSSSCT0000007253  | SNX27    | intron     | 0.178  | rs788490784 | 3 |
| AAAT.ATTT     | 4 | 106703909 | 106703933 | 6.25    | ENSSSCT0000007253  | SNX27    | intron     | .      | rs7907      | 2 |
| AAAT.ATTT     | 4 | 106703909 | 106703933 | 6.25    | ENSSSCT00000023541 | SNORD112 | promoter   | .      | rs7907      | 2 |
| AAC.GTT       | 4 | 107322105 | 107322129 | 8.33333 | ENSSSCT0000007266  | VPS72    | intron     | 0.148  | rs789598391 | 3 |
| AAAG.CTTT     | 4 | 107429908 | 107429928 | 5.25    | ENSSSCT0000007274  | CDC42SE1 | intron     | 0.221  | rs786233235 | 2 |
| AAAG.CTTT     | 4 | 107667696 | 107667710 | 3.75    | ENSSSCT0000007284  | CTSS     | intron     | -0.061 | rs793065801 | 2 |
| AAAC.GTTT     | 4 | 107699311 | 107699322 | 3       | ENSSSCT0000007285  | HORMAD1  | intron     | 0.389  | rs792621973 | 2 |
| AT.AT         | 4 | 109034393 | 109034408 | 8       | ENSSSCT00000023324 | LIX1L    | intron     | 0.093  | rs7935      | 3 |
| AAT.ATT       | 4 | 109036290 | 109036308 | 6.33333 | ENSSSCT00000023324 | LIX1L    | intron     | 0.458  | rs7911      | 2 |
| AAAC.GTTT     | 4 | 109038160 | 109038174 | 3.75    | ENSSSCT00000023324 | LIX1L    | intron     | 0.429  | rs698164247 | 2 |
| AATT.AATT     | 4 | 109040867 | 109040878 | 3       | ENSSSCT00000023324 | LIX1L    | intron     | 0.258  | rs790237818 | 2 |

|              |   |           |           |         |                    |          |            |        |               |   |
|--------------|---|-----------|-----------|---------|--------------------|----------|------------|--------|---------------|---|
| AT.AT        | 4 | 109604035 | 109604045 | 5.5     | .                  | .        | intergenic | 0.214  | .             | 3 |
| AAAT.ATTT    | 4 | 109720078 | 109720094 | 4.25    | .                  | .        | intergenic | -0.012 | rs792604029   | 2 |
| AG.CT        | 4 | 109785395 | 109785405 | 5.5     | .                  | .        | intergenic | -0.123 | .             | 2 |
| AG.CT        | 4 | 110018443 | 110018453 | 5.5     | .                  | .        | intergenic | 0.121  | rs791556347   | 2 |
| ACAT.ATGT    | 4 | 110123859 | 110123877 | 4.75    | ENSSSCT00000007340 | CHD1L    | intron     | -0.025 | .             | 4 |
| AAAC.GTTT    | 4 | 110196509 | 110196529 | 5.25    | ENSSSCT00000007341 | FMO5     | intron     | 0.137  | 352898 rs7869 | 2 |
| AG.CT        | 4 | 110556588 | 110556598 | 5.5     | ENSSSCT00000007347 | PDE4DIP  | intron     | .      | .             | 3 |
| AC.GT        | 4 | 110738323 | 110738333 | 5.5     | .                  | .        | intergenic | .      | .             | 4 |
| AAAAC.GTTTT  | 4 | 110747231 | 110747249 | 3.8     | .                  | .        | intergenic | 0.244  | rs787094981   | 2 |
| AAAG.CTTT    | 4 | 111554182 | 111554206 | 6.25    | .                  | .        | intergenic | -0.544 | rs791364294   | 2 |
| AT.AT        | 4 | 111801723 | 111801736 | 7       | ENSSSCT00000007362 | WARS     | intron     | 0.104  | .             | 3 |
| AC.GT        | 4 | 111816928 | 111816940 | 6.5     | ENSSSCT00000007362 | WARS     | intron     | 0.05   | 727858 rs7886 | 2 |
| AC.GT        | 4 | 111936770 | 111936783 | 7       | .                  | .        | intergenic | .      | rs790350667   | 2 |
| AT.AT        | 4 | 112054351 | 112054361 | 5.5     | .                  | .        | intergenic | 0.081  | .             | 3 |
| AAAAC.GTTTT  | 4 | 112056862 | 112056878 | 3.4     | .                  | .        | intergenic | -0.016 | rs788354726   | 2 |
| AG.CT        | 4 | 112289429 | 112289456 | 14      | .                  | .        | intergenic | .      | rs791956016   | 3 |
| AC.GT        | 4 | 112383988 | 112384003 | 8       | .                  | .        | intergenic | 0.347  | 132920 rs7933 | 5 |
| AC.GT        | 4 | 112401210 | 112401222 | 6.5     | .                  | .        | intergenic | .      | rs793429710   | 2 |
| AG.CT        | 4 | 112586713 | 112586723 | 5.5     | .                  | .        | intergenic | 0.151  | rs787132408   | 3 |
| AC.GT        | 4 | 112710974 | 112710985 | 6       | ENSSSCT00000007368 | .        | intron     | 0.252  | 793732 rs7893 | 2 |
| AC.GT        | 4 | 112710974 | 112710985 | 6       | ENSSSCT00000007367 | .        | intron     | 0.252  | 793732 rs7893 | 2 |
| AC.GT        | 4 | 112981985 | 112982018 | 17      | .                  | .        | intergenic | 0.166  | .             | 2 |
| AC.GT        | 4 | 113236104 | 113236116 | 6.5     | ENSSSCT00000007372 | MAN1A2   | intron     | .      | 598913 rs7889 | 3 |
| AAG.CTT      | 4 | 113328567 | 113328581 | 5       | ENSSSCT00000007372 | MAN1A2   | intron     | .      | rs790733726   | 2 |
| AAC.GTT      | 4 | 113376136 | 113376148 | 4.33333 | .                  | .        | intergenic | -0.091 | .             | 2 |
| AG.CT        | 4 | 113687693 | 113687708 | 8       | ENSSSCT00000035345 | CD101    | intron     | 0.064  | rs793366918   | 2 |
| AG.CT        | 4 | 113687693 | 113687708 | 8       | ENSSSCT00000033361 | CD101    | intron     | 0.064  | rs793366918   | 2 |
| AG.CT        | 4 | 113687693 | 113687708 | 8       | ENSSSCT00000033366 | CD101    | intron     | 0.064  | rs793366918   | 2 |
| AG.CT        | 4 | 113687693 | 113687708 | 8       | ENSSSCT00000007377 | CD101    | intron     | 0.064  | rs793366918   | 2 |
| AC.GT        | 4 | 113693351 | 113693361 | 5.5     | ENSSSCT00000035345 | CD101    | intron     | -0.19  | 157095 rs7897 | 4 |
| AC.GT        | 4 | 113693351 | 113693361 | 5.5     | ENSSSCT00000033361 | CD101    | intron     | -0.19  | 157095 rs7897 | 4 |
| AC.GT        | 4 | 113693351 | 113693361 | 5.5     | ENSSSCT00000033366 | CD101    | intron     | -0.19  | 157095 rs7897 | 4 |
| AAAT.ATTT    | 4 | 113695368 | 113695391 | 6       | ENSSSCT00000035345 | CD101    | intron     | 0.134  | 290138 rs7864 | 2 |
| AAAT.ATTT    | 4 | 113695368 | 113695391 | 6       | ENSSSCT00000033361 | CD101    | intron     | 0.134  | 290138 rs7864 | 2 |
| AAAT.ATTT    | 4 | 113695368 | 113695391 | 6       | ENSSSCT00000033366 | CD101    | intron     | 0.134  | 290138 rs7864 | 2 |
| AAG.CTT      | 4 | 114106232 | 114106254 | 7.66667 | ENSSSCT00000007380 | IGSF3    | intron     | 0.096  | rs793392023   | 2 |
| AC.GT        | 4 | 114290959 | 114290976 | 9       | .                  | .        | intergenic | .      | 302703 rs7894 | 3 |
| AT.AT        | 4 | 114534681 | 114534692 | 6       | .                  | .        | intergenic | .      | 328760 rs7874 | 2 |
| AT.AT        | 4 | 114536321 | 114536333 | 6.5     | .                  | .        | intergenic | -0.043 | 273282 rs7923 | 2 |
| AAAC.GTTT    | 4 | 114636022 | 114636043 | 5.5     | .                  | .        | intergenic | 0.219  | rs791808624   | 2 |
| AC.GT        | 4 | 114751515 | 114751535 | 10.5    | .                  | .        | intergenic | 0.03   | .             | 2 |
| AGG.CCT      | 4 | 114776400 | 114776413 | 4.66667 | ENSSSCT00000007388 | SLC22A15 | intron     | 0.921  | rs790261029   | 2 |
| AC.GT        | 4 | 114799616 | 114799636 | 10.5    | ENSSSCT00000007388 | SLC22A15 | intron     | -0.025 | rs792104710   | 2 |
| ACAT.ATGT    | 4 | 114807118 | 114807135 | 4.5     | ENSSSCT00000007388 | SLC22A15 | intron     | .      | rs786717998   | 2 |
| AT.AT        | 4 | 114987885 | 114987896 | 6       | .                  | .        | intergenic | 0.065  | rs789969639   | 3 |
| AC.GT        | 4 | 114992113 | 114992134 | 11      | .                  | .        | intergenic | -0.103 | 365818 rs7869 | 2 |
| GCATG.CATGC  | 4 | 114993789 | 114993811 | 3.83333 | .                  | .        | intergenic | -0.034 | rs791516972   | 2 |
| AC.GT        | 4 | 115451806 | 115451833 | 14      | .                  | .        | intergenic | 0.088  | 324855 rs7884 | 3 |
| AC.GT        | 4 | 115693291 | 115693306 | 8       | ENSSSCT00000007394 | TSHB     | promoter   | 0.229  | rs786823137   | 2 |
| AG.CT        | 4 | 115742501 | 115742515 | 7.5     | ENSSSCT00000007395 | SYCP1    | intron     | .      | rs787802898   | 2 |
| AAAT.ATTT    | 4 | 115791225 | 115791249 | 6.25    | ENSSSCT00000007395 | SYCP1    | intron     | 1.372  | 377704 rs7918 | 2 |
| AAAT.ATTT    | 4 | 116046098 | 116046124 | 6.75    | .                  | .        | intergenic | 0.9    | .             | 2 |
| AC.GT        | 4 | 116233201 | 116233217 | 8.5     | .                  | .        | intergenic | -0.06  | .             | 2 |
| AC.GT        | 4 | 116449759 | 116449768 | 5       | .                  | .        | intergenic | -0.18  | .             | 2 |
| AG.CT        | 4 | 116486093 | 116486105 | 6.5     | .                  | .        | intergenic | 0.151  | 349317 rs7869 | 3 |
| AGAT.ATCT    | 4 | 116504917 | 116504944 | 7       | .                  | .        | intergenic | .      | rs792850401   | 2 |
| AAC.GTT      | 4 | 116535374 | 116535405 | 10.6667 | .                  | .        | intergenic | -0.229 | rs792370991   | 2 |
| AAGG.CCTT    | 4 | 116544878 | 116544895 | 4.5     | .                  | .        | intergenic | 0.463  | rs791940826   | 2 |
| AGAT.ATCT    | 4 | 116794646 | 116794670 | 6.25    | ENSSSCT00000007406 | HIPK1    | intron     | 1.015  | 260982 rs7893 | 4 |
| AGAT.ATCT    | 4 | 116794646 | 116794670 | 6.25    | ENSSSCT00000007405 | HIPK1    | intron     | 1.015  | 260982 rs7893 | 4 |
| AAAC.GTTT    | 4 | 116881116 | 116881139 | 6       | ENSSSCT00000025586 | BCL2L15  | intron     | 0.258  | rs789573201   | 2 |
| AAAC.GTTT    | 4 | 116881116 | 116881139 | 6       | ENSSSCT00000007409 | BCL2L15  | intron     | 0.258  | rs789573201   | 2 |
| AG.CT        | 4 | 116980046 | 116980061 | 8       | ENSSSCT00000007412 | PHTF1    | intron     | .      | rs788860196   | 2 |
| AAAAT.ATTTT  | 4 | 116982463 | 116982481 | 3.8     | ENSSSCT00000007412 | PHTF1    | intron     | 0.29   | rs791356597   | 2 |
| AC.GT        | 4 | 117020844 | 117020855 | 6       | ENSSSCT00000007412 | PHTF1    | intron     | 0.046  | .             | 3 |
| AT.AT        | 4 | 117122962 | 117122972 | 5.5     | ENSSSCT00000007413 | MAGI3    | intron     | 0.167  | rs791237278   | 2 |
| AAT.ATT      | 4 | 117130759 | 117130778 | 6.66667 | ENSSSCT00000007413 | MAGI3    | intron     | 0.218  | rs790320346   | 2 |
| AT.AT        | 4 | 117352251 | 117352261 | 5.5     | .                  | .        | intergenic | 0.095  | rs793354030   | 2 |
| AAAG.CTTT    | 4 | 117357889 | 117357903 | 3.75    | .                  | .        | intergenic | -0.166 | rs786859939   | 2 |
| AAAC.GTTT    | 4 | 117370425 | 117370451 | 6.75    | .                  | .        | intergenic | 0.327  | 325417 rs7938 | 2 |
| AAAC.GTTT    | 4 | 117590865 | 117590884 | 5       | .                  | .        | intergenic | 0.035  | rs792837597   | 2 |
| AC.GT        | 4 | 117597719 | 117597729 | 5.5     | .                  | .        | intergenic | 0.809  | rs786238574   | 2 |
| AG.CT        | 4 | 118022451 | 118022467 | 8.5     | .                  | .        | intergenic | 0.663  | rs791581826   | 4 |
| AG.CT        | 4 | 118425469 | 118425500 | 16      | .                  | .        | intergenic | 0.145  | rs791742631   | 3 |
| AG.CT        | 4 | 118552877 | 118552890 | 7       | .                  | .        | intergenic | 0.226  | 183575 rs7885 | 2 |
| AG.CT        | 4 | 118662543 | 118662553 | 5.5     | .                  | .        | intergenic | 0.01   | rs789573532   | 2 |
| AATT.AATT    | 4 | 119065858 | 119065873 | 4       | ENSSSCT00000027506 | C1orf162 | promoter   | .      | 155500 rs7871 | 2 |
| AAAC.GTTT    | 4 | 119418293 | 119418309 | 4.25    | ENSSSCT00000023214 | CEPT1    | intron     | 0.053  | 395404 rs7913 | 2 |
| AAAC.GTTT    | 4 | 119418293 | 119418309 | 4.25    | ENSSSCT00000030532 | CHIA     | intron     | 0.053  | 395404 rs7913 | 2 |
| AT.AT        | 4 | 119427784 | 119427794 | 5.5     | ENSSSCT00000023214 | CEPT1    | intron     | 0.056  | rs786413265   | 2 |
| AC.GT        | 4 | 119644119 | 119644132 | 7       | .                  | .        | intergenic | 0.203  | rs787689226   | 2 |
| AAAAG.CTTTT  | 4 | 119660611 | 119660629 | 3.8     | .                  | .        | intergenic | 0.145  | rs790924087   | 2 |
| AC.GT        | 4 | 119735311 | 119735339 | 14.5    | .                  | .        | intergenic | 0.12   | .             | 2 |
| AAAAAT.ATTTT | 4 | 120198453 | 120198475 | 3.83333 | .                  | .        | intergenic | 0.18   | rs790475222   | 2 |

|              |   |           |           |         |                    |          |            |        |               |   |
|--------------|---|-----------|-----------|---------|--------------------|----------|------------|--------|---------------|---|
| AAAC.GTTT    | 4 | 120245327 | 120245345 | 4.75    | .                  | .        | intergenic | .      | .             | 3 |
| ACC.GGT      | 4 | 120302917 | 120302933 | 5.66667 | ENSSSCT00000007459 | .        | intron     | -0.074 | rs788288646   | 2 |
| AAGAG.CTCTT  | 4 | 120536659 | 120536702 | 8.8     | ENSSSCT00000007463 | .        | intron     | -0.128 | 118612 rs7877 | 2 |
| AC.GT        | 4 | 120690195 | 120690209 | 7.5     | .                  | .        | intergenic | .      | rs786726796   | 7 |
| AAAG.CTTT    | 4 | 121371120 | 121371148 | 7.25    | .                  | .        | intergenic | 0.103  | rs790639693   | 2 |
| AT.AT        | 4 | 121413228 | 121413237 | 5       | ENSSSCT00000007487 | KIAA1324 | intron     | 0.144  | rs790815005   | 2 |
| AC.GT        | 4 | 121600850 | 121600869 | 10      | ENSSSCT00000023502 | .        | intron     | .      | .             | 2 |
| AT.AT        | 4 | 121703953 | 121703964 | 6       | ENSSSCT00000025132 | AKNAD1   | intron     | .      | .             | 4 |
| AT.AT        | 4 | 121703953 | 121703964 | 6       | ENSSSCT00000007493 | AKNAD1   | intron     | .      | .             | 4 |
| AGG.CCT      | 4 | 121828012 | 121828030 | 6.33333 | ENSSSCT00000007495 | FNDC7    | promoter   | .      | rs790816646   | 2 |
| AGG.CCT      | 4 | 121828012 | 121828030 | 6.33333 | ENSSSCT00000007496 | FNDC7    | promoter   | .      | rs790816646   | 2 |
| AT.AT        | 4 | 122394762 | 122394773 | 6       | .                  | .        | intergenic | 0.158  | rs701312758   | 2 |
| ATC.GAT      | 4 | 122398413 | 122398426 | 4.66667 | .                  | .        | intergenic | 0.17   | rs793572984   | 2 |
| AC.GT        | 4 | 122772893 | 122772909 | 8.5     | ENSSSCT00000007504 | .        | intron     | 0.55   | .             | 2 |
| AAT.ATT      | 4 | 123129877 | 123129891 | 5       | ENSSSCT00000035715 | NTNG1    | intron     | 0.087  | rs791341256   | 4 |
| AAT.ATT      | 4 | 123129877 | 123129891 | 5       | ENSSSCT00000034022 | NTNG1    | intron     | 0.087  | rs791341256   | 4 |
| AAT.ATT      | 4 | 123129877 | 123129891 | 5       | ENSSSCT00000033143 | NTNG1    | intron     | 0.087  | rs791341256   | 4 |
| AAT.ATT      | 4 | 123129877 | 123129891 | 5       | ENSSSCT00000022367 | NTNG1    | intron     | 0.087  | rs791341256   | 4 |
| AAT.ATT      | 4 | 123129877 | 123129891 | 5       | ENSSSCT00000007505 | NTNG1    | intron     | 0.087  | rs791341256   | 4 |
| AAT.ATT      | 4 | 123129877 | 123129891 | 5       | ENSSSCT00000033782 | NTNG1    | intron     | 0.087  | rs791341256   | 4 |
| AAT.ATT      | 4 | 123129877 | 123129891 | 5       | ENSSSCT00000035789 | NTNG1    | intron     | 0.087  | rs791341256   | 4 |
| ATC.GAT      | 4 | 123139761 | 123139776 | 5.33333 | ENSSSCT00000035789 | NTNG1    | intron     | 0.088  | 337629 rs7901 | 2 |
| ATC.GAT      | 4 | 123139761 | 123139776 | 5.33333 | ENSSSCT00000035715 | NTNG1    | intron     | 0.088  | 337629 rs7901 | 2 |
| ATC.GAT      | 4 | 123139761 | 123139776 | 5.33333 | ENSSSCT00000033143 | NTNG1    | intron     | 0.088  | 337629 rs7901 | 2 |
| ATC.GAT      | 4 | 123139761 | 123139776 | 5.33333 | ENSSSCT00000022367 | NTNG1    | intron     | 0.088  | 337629 rs7901 | 2 |
| ATC.GAT      | 4 | 123139761 | 123139776 | 5.33333 | ENSSSCT00000007505 | NTNG1    | intron     | 0.088  | 337629 rs7901 | 2 |
| ATC.GAT      | 4 | 123139761 | 123139776 | 5.33333 | ENSSSCT00000033782 | NTNG1    | intron     | 0.088  | 337629 rs7901 | 2 |
| ATC.GAT      | 4 | 123139761 | 123139776 | 5.33333 | ENSSSCT00000034022 | NTNG1    | intron     | 0.088  | 337629 rs7901 | 2 |
| AC.GT        | 4 | 123248841 | 123248862 | 11      | .                  | .        | intergenic | -0.452 | rs696498154   | 2 |
| AC.GT        | 4 | 123285234 | 123285259 | 13      | .                  | .        | intergenic | 0.144  | rs791295508   | 3 |
| AAAT.ATTT    | 4 | 123300078 | 123300096 | 4.75    | .                  | .        | intergenic | 0      | 78423 rs7876  | 2 |
| AAAT.ATTT    | 4 | 123436784 | 123436802 | 4.75    | .                  | .        | intergenic | .      | rs793588911   | 2 |
| AG.CT        | 4 | 123860254 | 123860265 | 6       | .                  | .        | intergenic | -0.086 | 224749 rs7879 | 2 |
| AG.CT        | 4 | 123922438 | 123922450 | 6.5     | .                  | .        | intergenic | 0.19   | .             | 2 |
| AAT.ATT      | 4 | 123931195 | 123931206 | 4       | .                  | .        | intergenic | 0.128  | rs787949499   | 2 |
| AG.CT        | 4 | 123982463 | 123982474 | 6       | .                  | .        | intergenic | -0.204 | 325621 rs7863 | 2 |
| AAAAC.GTTTT  | 4 | 124386483 | 124386505 | 4.6     | .                  | .        | intergenic | -0.229 | 371729 rs7866 | 2 |
| AC.GT        | 4 | 124393654 | 124393665 | 6       | .                  | .        | intergenic | .      | 359380 rs7864 | 2 |
| ATC.GAT      | 4 | 124403401 | 124403415 | 5       | .                  | .        | intergenic | -0.124 | 306799 rs7894 | 2 |
| AT.AT        | 4 | 124445590 | 124445599 | 5       | .                  | .        | intergenic | .      | 164434 rs7916 | 4 |
| AT.AT        | 4 | 124453163 | 124453172 | 5       | .                  | .        | intergenic | .      | .             | 2 |
| ACAT.ATGT    | 4 | 124480905 | 124480933 | 7.25    | .                  | .        | intergenic | 0.039  | 735249 rs7904 | 2 |
| AT.AT        | 4 | 124608726 | 124608739 | 7       | .                  | .        | intergenic | .      | rs786339736   | 3 |
| AG.CT        | 4 | 124729209 | 124729219 | 5.5     | .                  | .        | intergenic | -0.176 | 151535 rs7080 | 4 |
| AAAAC.GTTTT  | 4 | 125014090 | 125014108 | 3.8     | .                  | .        | intergenic | 0.073  | 761045 rs7930 | 2 |
| AT.AT        | 4 | 125124854 | 125124867 | 7       | .                  | .        | intergenic | .      | 194543 rs7892 | 2 |
| AT.AT        | 4 | 125128680 | 125128689 | 5       | .                  | .        | intergenic | 0.098  | 390707 rs7912 | 4 |
| AAC.GTT      | 4 | 125682621 | 125682634 | 4.66667 | .                  | .        | intergenic | -0.02  | 169505 rs7916 | 2 |
| AAAAC.GTTTT  | 4 | 125742661 | 125742677 | 3.4     | .                  | .        | intergenic | 0.099  | 202608 rs7883 | 2 |
| AAAG.CTTT    | 4 | 125845586 | 125845608 | 5.75    | .                  | .        | intergenic | .      | rs790346002   | 2 |
| AC.GT        | 4 | 125875672 | 125875689 | 9       | .                  | .        | intergenic | -0.145 | 313708 rs7936 | 2 |
| AAG.CTT      | 4 | 125887150 | 125887161 | 4       | .                  | .        | intergenic | .      | rs787827179   | 2 |
| ACAG.CTGT    | 4 | 125892356 | 125892370 | 3.75    | .                  | .        | intergenic | .      | .             | 2 |
| AAAAG.CTTTT  | 4 | 125960206 | 125960229 | 4.8     | .                  | .        | intergenic | .      | 337565 rs7876 | 2 |
| AAAG.CTTT    | 4 | 126109574 | 126109585 | 3       | .                  | .        | intergenic | .      | 354669 rs7906 | 2 |
| AAAAG.CTTTT  | 4 | 126149369 | 126149385 | 3.4     | .                  | .        | intergenic | -0.142 | .             | 2 |
| AAAC.GTTT    | 4 | 126765524 | 126765547 | 6       | .                  | .        | intergenic | 0.067  | 398541 rs7875 | 2 |
| AAAT.ATTT    | 4 | 126919186 | 126919208 | 5.75    | .                  | .        | intergenic | 0.046  | 340399 rs7932 | 2 |
| AAC.GTT      | 4 | 127064948 | 127064973 | 8.66667 | .                  | .        | intergenic | 0.375  | 385035 rs7909 | 3 |
| AC.GT        | 4 | 127074650 | 127074676 | 13.5    | .                  | .        | intergenic | .      | rs791419708   | 4 |
| AAAC.GTTT    | 4 | 127301975 | 127301993 | 4.75    | ENSSSCT00000007510 | COL11A1  | intron     | 0.474  | 178262 rs7899 | 2 |
| AAAGC.GCTTT  | 4 | 127512443 | 127512464 | 4.4     | .                  | .        | intergenic | -0.106 | rs787128110   | 2 |
| AT.AT        | 4 | 127521827 | 127521839 | 6.5     | .                  | .        | intergenic | -0.012 | rs789407194   | 4 |
| AG.CT        | 4 | 127574506 | 127574515 | 5       | .                  | .        | intergenic | -0.146 | 395846 rs7871 | 2 |
| AT.AT        | 4 | 127593303 | 127593325 | 11.5    | .                  | .        | intergenic | 0.046  | .             | 2 |
| AAAG.CTTT    | 4 | 127763731 | 127763748 | 4.5     | .                  | .        | intergenic | .      | rs788081734   | 2 |
| AATG.CATT    | 4 | 127903248 | 127903263 | 4       | .                  | .        | intergenic | 0.023  | rs791125815   | 2 |
| AAAAG.CTTTT  | 4 | 128371270 | 128371291 | 4.4     | .                  | .        | intergenic | .      | .             | 2 |
| AC.GT        | 4 | 128570590 | 128570603 | 7       | .                  | .        | intergenic | .      | rs787314544   | 2 |
| AAAAC.GTTTT  | 4 | 128667009 | 128667031 | 4.6     | .                  | .        | intergenic | -0.098 | 350777 rs7884 | 2 |
| AT.AT        | 4 | 128764331 | 128764354 | 12      | .                  | .        | intergenic | .      | rs793469330   | 2 |
| AG.CT        | 4 | 128923517 | 128923526 | 5       | ENSSSCT00000007513 | SLC30A7  | intron     | -0.456 | .             | 2 |
| AT.AT        | 4 | 128998403 | 128998413 | 5.5     | .                  | .        | intergenic | .      | rs787561075   | 2 |
| AC.GT        | 4 | 129044693 | 129044703 | 5.5     | ENSSSCT00000007515 | VCAM1    | intron     | 0.804  | rs790763321   | 3 |
| AC.GT        | 4 | 129044693 | 129044703 | 5.5     | ENSSSCT00000035678 | VCAM1    | intron     | 0.804  | rs790763321   | 3 |
| AG.CT        | 4 | 129168525 | 129168534 | 5       | .                  | .        | intergenic | -0.049 | .             | 3 |
| AACC.GGTT    | 4 | 129312520 | 129312537 | 4.5     | ENSSSCT00000007517 | CDC14A   | intron     | 0.054  | rs791951324   | 2 |
| AC.GT        | 4 | 129410841 | 129410851 | 5.5     | ENSSSCT00000007517 | CDC14A   | intron     | 0.12   | rs792765693   | 2 |
| AT.AT        | 4 | 129444234 | 129444243 | 5       | ENSSSCT00000007517 | CDC14A   | intron     | .      | rs786387942   | 2 |
| AAAAT.ATTTT  | 4 | 129604115 | 129604137 | 4.6     | ENSSSCT00000007520 | .        | intron     | 0.042  | 379447 rs7869 | 2 |
| AAAAAT.ATTTT | 4 | 129722191 | 129722226 | 6       | .                  | .        | intergenic | .      | rs793644086   | 2 |
| AAAAC.GTTTT  | 4 | 129725395 | 129725419 | 5       | ENSSSCT00000007524 | SLC35A3  | intron     | 4.582  | rs793091476   | 2 |
| AC.GT        | 4 | 129738796 | 129738806 | 5.5     | ENSSSCT00000007524 | SLC35A3  | intron     | 0.143  | 393654 rs7936 | 3 |
| AC.GT        | 4 | 129983528 | 129983537 | 5       | ENSSSCT00000007528 | PALMD    | intron     | 0.116  | .             | 2 |



|               |   |           |           |         |                    |         |            |        |             |        |   |
|---------------|---|-----------|-----------|---------|--------------------|---------|------------|--------|-------------|--------|---|
| AT.AT         | 4 | 130027608 | 130027619 | 6       | .                  | .       | intergenic | 0.077  | .           | .      | 2 |
| AAAC.GTTT     | 4 | 130168903 | 130168915 | 3.25    | .                  | .       | intergenic | 0.185  | rs17376     | rs7900 | 2 |
| AG.CT         | 4 | 130183274 | 130183286 | 6.5     | .                  | .       | intergenic | 0.075  | rs790163231 | .      | 3 |
| AAAATT.AATTTT | 4 | 130188619 | 130188640 | 3.66667 | .                  | .       | intergenic | .      | rs790583651 | .      | 3 |
| AAC.GTT       | 4 | 130219709 | 130219725 | 5.66667 | .                  | .       | intergenic | .      | rs06207     | rs7934 | 4 |
| AC.GT         | 4 | 130385433 | 130385446 | 7       | .                  | .       | intergenic | -0.026 | .           | .      | 4 |
| AT.AT         | 4 | 130494681 | 130494693 | 6.5     | .                  | .       | intergenic | 0.075  | rs788663421 | .      | 2 |
| AC.GT         | 4 | 130535910 | 130535922 | 6.5     | .                  | .       | intergenic | 0.112  | rs790103133 | .      | 2 |
| AC.GT         | 4 | 130754502 | 130754523 | 11      | .                  | .       | intergenic | -0.028 | rs793420662 | .      | 2 |
| AAT.ATT       | 4 | 130760027 | 130760044 | 6       | ENSSSCT0000007531  | .       | intron     | 0.446  | rs791168680 | .      | 2 |
| AG.CT         | 4 | 130835919 | 130835928 | 5       | .                  | .       | intergenic | .      | rs02868     | rs7879 | 2 |
| AT.AT         | 4 | 130915187 | 130915197 | 5.5     | .                  | .       | intergenic | .      | rs787920757 | .      | 2 |
| ACAT.ATGT     | 4 | 130933174 | 130933200 | 6.75    | .                  | .       | intergenic | 0.036  | rs793094458 | .      | 2 |
| AAAT.ATTT     | 4 | 131162248 | 131162279 | 8       | .                  | .       | intergenic | .      | rs793044957 | .      | 4 |
| AC.GT         | 4 | 131522045 | 131522054 | 5       | ENSSSCT0000007532  | DPYD    | intron     | 0.146  | rs788560613 | .      | 2 |
| AC.GT         | 4 | 132012555 | 132012568 | 7       | ENSSSCT0000007532  | DPYD    | intron     | -0.067 | rs267249    | rs7887 | 2 |
| AAT.ATT       | 4 | 132038462 | 132038481 | 6.66667 | ENSSSCT0000007532  | DPYD    | intron     | -0.039 | rs793527285 | .      | 3 |
| AAAC.GTTT     | 4 | 132086104 | 132086122 | 4.75    | ENSSSCT0000007532  | DPYD    | intron     | 0.079  | .           | .      | 2 |
| AAAG.CTTT     | 4 | 132122520 | 132122533 | 3.5     | ENSSSCT0000007532  | DPYD    | intron     | -0.036 | rs696178186 | .      | 2 |
| AC.GT         | 4 | 132170872 | 132170897 | 13      | ENSSSCT0000007532  | DPYD    | intron     | -0.171 | rs790768312 | .      | 2 |
| AAAG.CTTT     | 4 | 132177930 | 132177953 | 6       | ENSSSCT0000007532  | DPYD    | intron     | 3.53   | .           | .      | 3 |
| AT.AT         | 4 | 132182652 | 132182662 | 5.5     | ENSSSCT0000007532  | DPYD    | intron     | 0.029  | rs23991     | rs7900 | 2 |
| AAAT.ATTT     | 4 | 132269953 | 132269968 | 4       | ENSSSCT0000007532  | DPYD    | intron     | -0.269 | rs791700588 | .      | 2 |
| AAAAC.GTTTT   | 4 | 132278668 | 132278696 | 5.8     | ENSSSCT0000007532  | DPYD    | intron     | 0.101  | rs792819384 | .      | 2 |
| AC.GT         | 4 | 132434332 | 132434350 | 9.5     | ENSSSCT0000007532  | DPYD    | intron     | 0.432  | rs707676537 | .      | 2 |
| AAAAT.ATTTT   | 4 | 132466428 | 132466456 | 5.8     | ENSSSCT0000007532  | DPYD    | intron     | 0.348  | rs793856650 | .      | 2 |
| AG.CT         | 4 | 132644460 | 132644470 | 5.5     | .                  | .       | intergenic | -0.147 | rs792788420 | .      | 2 |
| AAAT.ATTT     | 4 | 132907639 | 132907658 | 5       | .                  | .       | intergenic | 0.039  | rs790861084 | .      | 3 |
| AC.GT         | 4 | 132962088 | 132962118 | 15.5    | .                  | .       | intergenic | 0.131  | rs175644    | rs7864 | 3 |
| AAT.ATT       | 4 | 132993380 | 132993403 | 8       | .                  | .       | intergenic | 0.011  | rs791507688 | .      | 2 |
| AT.AT         | 4 | 133051125 | 133051136 | 6       | .                  | .       | intergenic | 0.1    | rs315226    | rs7909 | 3 |
| AAT.ATT       | 4 | 133271245 | 133271257 | 4.33333 | .                  | .       | intergenic | -0.051 | rs788645404 | .      | 2 |
| AAC.GTT       | 4 | 133380522 | 133380540 | 6.33333 | .                  | .       | intergenic | 0.05   | .           | .      | 2 |
| AGGGC.GCCCT   | 4 | 133608154 | 133608174 | 4.2     | .                  | .       | intergenic | 0.136  | rs786477494 | .      | 2 |
| AC.GT         | 4 | 133845545 | 133845555 | 5.5     | .                  | .       | intergenic | -0.086 | rs708535863 | .      | 2 |
| AC.GT         | 4 | 133867953 | 133867976 | 12      | .                  | .       | intergenic | .      | rs788471019 | .      | 2 |
| AAC.GTT       | 4 | 133930145 | 133930159 | 5       | ENSSSCT0000007539  | ALG14   | intron     | 0.099  | .           | .      | 3 |
| AATG.CATT     | 4 | 134164544 | 134164559 | 4       | ENSSSCT00000031017 | .       | intron     | 1.769  | rs786622356 | .      | 3 |
| AG.CT         | 4 | 134249868 | 134249878 | 5.5     | ENSSSCT0000007541  | CNN3    | intron     | 1.769  | rs786622356 | .      | 3 |
| AG.CT         | 4 | 134249868 | 134249878 | 5.5     | .                  | .       | intergenic | -0.058 | rs789238456 | .      | 2 |
| AAAAT.ATTTT   | 4 | 134311514 | 134311528 | 3       | .                  | .       | intergenic | 0.052  | rs792580625 | .      | 2 |
| AAC.GTT       | 4 | 134333979 | 134333994 | 5.33333 | .                  | .       | intergenic | 0.056  | .           | .      | 3 |
| AG.CT         | 4 | 134349247 | 134349256 | 5       | .                  | .       | intergenic | .      | rs789128113 | .      | 2 |
| AAAC.GTTT     | 4 | 134374546 | 134374559 | 3.5     | ENSSSCT0000007542  | .       | intron     | .      | rs786562571 | .      | 2 |
| AC.GT         | 4 | 134402197 | 134402210 | 7       | ENSSSCT00000028417 | .       | intron     | .      | rs789551788 | .      | 2 |
| AAAAT.ATTTT   | 4 | 134593550 | 134593582 | 6.6     | .                  | .       | intergenic | 0.03   | rs354776    | rs7901 | 2 |
| AAAT.ATTT     | 4 | 134625335 | 134625353 | 4.75    | .                  | .       | intergenic | 1.165  | rs37502     | rs7864 | 2 |
| AAAG.CTTT     | 4 | 134762571 | 134762587 | 4.25    | ENSSSCT0000007543  | .       | intron     | 0.153  | rs793349084 | .      | 2 |
| AC.GT         | 4 | 134809903 | 134809915 | 6.5     | .                  | .       | intergenic | 0.338  | rs789909014 | .      | 4 |
| AT.AT         | 4 | 134810964 | 134810974 | 5.5     | .                  | .       | intergenic | 0.117  | rs788916555 | .      | 2 |
| AAAC.GTTT     | 4 | 134869375 | 134869395 | 5.25    | ENSSSCT0000007545  | ABCA4   | intron     | 0.218  | rs788276046 | .      | 2 |
| AAAAC.GTTTT   | 4 | 134965684 | 134965702 | 3.8     | ENSSSCT0000007545  | ABCA4   | intron     | 0.253  | rs792689974 | .      | 2 |
| AAAC.GTTT     | 4 | 135022535 | 135022554 | 5       | ENSSSCT0000007546  | GCLM    | intron     | 0.241  | rs793129780 | .      | 2 |
| AAT.ATT       | 4 | 135023629 | 135023642 | 4.66667 | ENSSSCT0000007546  | GCLM    | intron     | .      | rs790765239 | .      | 2 |
| AAAAG.CTTTT   | 4 | 135579947 | 135579962 | 3.2     | ENSSSCT0000007551  | TMED5   | intron     | .      | .           | .      | 2 |
| ACAG.CTGT     | 4 | 135587270 | 135587289 | 5       | .                  | .       | intergenic | .      | rs792335977 | .      | 2 |
| AAAC.GTTT     | 4 | 135601200 | 135601214 | 3.75    | ENSSSCT0000007552  | .       | intron     | 0.167  | rs789674928 | .      | 2 |
| AAAT.ATTT     | 4 | 135718940 | 135718965 | 6.5     | ENSSSCT0000007553  | MTF2    | intron     | 0.167  | rs789674928 | .      | 2 |
| AAAT.ATTT     | 4 | 135718940 | 135718965 | 6.5     | ENSSSCT00000034081 | MTF2    | intron     | 0.38   | rs228315    | rs7883 | 2 |
| AAT.ATT       | 4 | 135759024 | 135759051 | 9.33333 | .                  | .       | intergenic | 0.614  | rs787903374 | .      | 2 |
| AT.AT         | 4 | 135805841 | 135805851 | 5.5     | ENSSSCT00000033701 | TGFBFR3 | intron     | 0.251  | rs792716239 | .      | 2 |
| AG.CT         | 4 | 136679253 | 136679265 | 6.5     | ENSSSCT00000033701 | TGFBFR3 | intron     | 1.392  | rs792273460 | .      | 2 |
| AG.CT         | 4 | 136754594 | 136754606 | 6.5     | ENSSSCT0000007569  | TGFBFR3 | intron     | 0.252  | rs790274523 | .      | 2 |
| AAAAC.GTTTT   | 4 | 136885873 | 136885892 | 4       | ENSSSCT00000035989 | TGFBFR3 | intron     | 0.252  | rs790274523 | .      | 2 |
| AAAAC.GTTTT   | 4 | 136885873 | 136885892 | 4       | ENSSSCT00000036583 | TGFBFR3 | intron     | 0.252  | rs790274523 | .      | 2 |
| AAAAC.GTTTT   | 4 | 136885873 | 136885892 | 4       | ENSSSCT00000033701 | TGFBFR3 | intron     | 0.252  | rs790274523 | .      | 2 |
| AAAAC.GTTTT   | 4 | 136885873 | 136885892 | 4       | ENSSSCT00000034411 | TGFBFR3 | intron     | 0.252  | rs790274523 | .      | 2 |
| AGG.CCT       | 4 | 137168365 | 137168382 | 6       | ENSSSCT0000007570  | HFM1    | intron     | 0.126  | rs194219    | rs7887 | 2 |
| AAAC.GTTT     | 4 | 137234497 | 137234523 | 6.75    | .                  | .       | intergenic | 0.188  | .           | .      | 2 |
| AAAC.GTTT     | 4 | 137273023 | 137273034 | 3       | .                  | .       | intergenic | 0.118  | rs749940    | rs7895 | 2 |
| AT.AT         | 4 | 137574337 | 137574348 | 6       | .                  | .       | intergenic | .      | rs789660025 | .      | 4 |
| AC.GT         | 4 | 137691536 | 137691546 | 5.5     | .                  | .       | intergenic | 0.373  | .           | .      | 2 |
| AG.CT         | 4 | 137792343 | 137792375 | 16.5    | .                  | .       | intergenic | 0.14   | rs789982832 | .      | 2 |
| AAT.ATT       | 4 | 138158472 | 138158493 | 7.33333 | .                  | .       | intergenic | 0.263  | rs786704468 | .      | 2 |
| AAAAC.GTTTT   | 4 | 138162885 | 138162904 | 4       | .                  | .       | intergenic | .      | rs786407454 | .      | 2 |
| AG.CT         | 4 | 138315919 | 138315940 | 11      | .                  | .       | intergenic | .      | .           | .      | 4 |
| AT.AT         | 4 | 138418005 | 138418017 | 6.5     | .                  | .       | intergenic | .      | rs305310    | rs7888 | 3 |
| AC.GT         | 4 | 138435749 | 138435759 | 5.5     | .                  | .       | intergenic | 0.314  | .           | .      | 2 |
| AG.CT         | 4 | 138647678 | 138647690 | 6.5     | .                  | .       | intergenic | .      | rs788274045 | .      | 2 |
| AAAC.GTTT     | 4 | 139096049 | 139096072 | 6       | .                  | .       | intergenic | 0.028  | rs789996241 | .      | 2 |
| AC.GT         | 4 | 139272891 | 139272901 | 5.5     | .                  | .       | intergenic | -0.21  | rs793560151 | .      | 3 |
| AT.AT         | 4 | 139307839 | 139307849 | 5.5     | .                  | .       | intergenic | .      | rs07328     | rs7926 | 2 |
| AAAT.ATTT     | 4 | 139484153 | 139484171 | 4.75    | .                  | .       | intergenic | .      | rs787103557 | .      | 2 |

|             |   |           |           |         |                    |          |            |        |             |             |   |
|-------------|---|-----------|-----------|---------|--------------------|----------|------------|--------|-------------|-------------|---|
| AAAC.GTTT   | 4 | 139610163 | 139610194 | 8       | .                  | .        | intergenic | .      | 189979      | rs7933      | 4 |
| AAAAC.GTTTT | 4 | 139738145 | 139738163 | 3.8     | .                  | .        | intergenic | 0.777  | .           | rs786876175 | 2 |
| AAG.CTT     | 4 | 139793449 | 139793465 | 5.66667 | .                  | .        | intergenic | .      | 351456      | rs7885      | 2 |
| AAATT.AATTT | 4 | 140193692 | 140193714 | 4.6     | .                  | .        | intergenic | .      | rs793015156 | 2           |   |
| AG.CT       | 4 | 141203828 | 141203837 | 5       | .                  | .        | intergenic | 0.046  | 389896      | rs7893      | 3 |
| AAAAC.GTTTT | 4 | 141298092 | 141298109 | 3.6     | .                  | .        | intergenic | 0.252  | 297848      | rs7874      | 2 |
| AC.GT       | 4 | 141347773 | 141347790 | 9       | ENSSSCT00000007590 | LMO4     | intron     | 3.653  | rs786545600 | 2           |   |
| AG.CT       | 4 | 141406932 | 141406944 | 6.5     | .                  | .        | intergenic | 1.665  | rs789009050 | 2           |   |
| AAAC.GTT    | 4 | 141470107 | 141470123 | 5.66667 | .                  | .        | intergenic | -0.113 | 366755      | rs7917      | 2 |
| AAAG.CTTT   | 4 | 141728671 | 141728701 | 7.75    | ENSSSCT00000028257 | .        | intron     | 0.061  | rs786851127 | 2           |   |
| AAAC.GTTT   | 4 | 141957226 | 141957244 | 4.75    | .                  | .        | intergenic | 0.19   | rs793452112 | 2           |   |
| AC.GT       | 4 | 142145143 | 142145161 | 9.5     | ENSSSCT00000007595 | CLCA1    | intron     | 0.599  | 130116      | rs7885      | 2 |
| AG.CT       | 4 | 142180379 | 142180389 | 5.5     | .                  | .        | intergenic | 0.173  | .           | 2           |   |
| AAAG.CTTT   | 4 | 142418861 | 142418873 | 3.25    | .                  | .        | intergenic | 0.411  | .           | 2           |   |
| AG.CT       | 4 | 142448831 | 142448846 | 8       | .                  | .        | intergenic | 0.026  | rs788579170 | 2           |   |
| AGG.CCT     | 4 | 142643470 | 142643481 | 4       | .                  | .        | intergenic | 0.152  | .           | 2           |   |
| AT.AT       | 4 | 142748854 | 142748866 | 6.5     | ENSSSCT00000007603 | ZNHIT6   | intron     | 1.534  | rs709165712 | 3           |   |
| AAAAC.GTTTT | 4 | 142759611 | 142759629 | 3.16667 | ENSSSCT00000007603 | ZNHIT6   | intron     | .      | 295164      | rs7914      | 2 |
| AG.CT       | 5 | 1529171   | 1529182   | 6       | .                  | .        | intergenic | 0.062  | .           | 2           |   |
| AC.GT       | 5 | 1852971   | 1852984   | 7       | .                  | .        | intergenic | -0.039 | rs792433403 | 2           |   |
| AAAC.GTTT   | 5 | 2014771   | 2014790   | 5       | .                  | .        | intergenic | -0.178 | rs792128714 | 2           |   |
| AAG.CTT     | 5 | 2556673   | 2556695   | 7.66667 | .                  | .        | intergenic | 0.033  | 165032      | rs7883      | 4 |
| AC.GT       | 5 | 2596719   | 2596731   | 6.5     | ENSSSCT00000000029 | EFCAB6   | intron     | -0.078 | 387812      | rs7884      | 2 |
| AG.CT       | 5 | 2937784   | 2937794   | 5.5     | .                  | .        | intergenic | -0.119 | rs786540436 | 2           |   |
| ATC.GAT     | 5 | 4161504   | 4161518   | 5       | .                  | .        | intergenic | -0.03  | 304185      | rs7922      | 2 |
| AAT.ATT     | 5 | 4311716   | 4311732   | 5.66667 | ENSSSCT00000000066 | DES11    | intron     | 0.184  | 393571      | rs7925      | 2 |
| AAAAC.GTTT  | 5 | 4317773   | 4317791   | 4.75    | ENSSSCT00000000066 | DES11    | intron     | 0.076  | rs791267180 | 2           |   |
| AAC.GTT     | 5 | 4615805   | 4615824   | 6.66667 | ENSSSCT00000026332 | EP300    | intron     | .      | 255902      | rs7872      | 2 |
| AAC.GTT     | 5 | 4615805   | 4615824   | 6.66667 | ENSSSCT00000000074 | EP300    | intron     | .      | 255902      | rs7872      | 2 |
| AAAT.ATTT   | 5 | 4683576   | 4683588   | 3.25    | .                  | .        | intergenic | .      | rs792758549 | 2           |   |
| AAAC.GTTT   | 5 | 4817125   | 4817143   | 4.75    | ENSSSCT00000000078 | SLC25A17 | intron     | 0.175  | rs791539431 | 4           |   |
| AGG.CCT     | 5 | 4851668   | 4851680   | 4.33333 | .                  | .        | intergenic | 0.289  | rs791068223 | 2           |   |
| AAAC.GTTT   | 5 | 5096381   | 5096406   | 6.5     | .                  | .        | intergenic | .      | rs791327969 | 2           |   |
| AT.AT       | 5 | 5105386   | 5105397   | 6       | .                  | .        | intergenic | 0.673  | rs790221783 | 2           |   |
| AATG.CATT   | 5 | 5153012   | 5153030   | 4.75    | .                  | .        | intergenic | 0.087  | rs787709638 | 2           |   |
| AAAT.ATTT   | 5 | 5229962   | 5229978   | 4.25    | ENSSSCT00000000082 | SGSM3    | intron     | .      | 355580      | rs7890      | 2 |
| AAAT.ATTT   | 5 | 5229962   | 5229978   | 4.25    | ENSSSCT00000031184 | SGSM3    | intron     | .      | 355580      | rs7890      | 2 |
| AGG.CCT     | 5 | 5368637   | 5368651   | 5       | ENSSSCT00000000084 | .        | intron     | 0.101  | rs695920451 | 2           |   |
| AGC.GCT     | 5 | 5374983   | 5375000   | 6       | ENSSSCT00000000084 | .        | cds        | 0.281  | 319057      | rs7865      | 3 |
| AAAC.GTTT   | 5 | 5376116   | 5376142   | 6.75    | ENSSSCT00000000084 | .        | intron     | -0.09  | rs792472842 | 2           |   |
| ACCCC.GGGGT | 5 | 5380221   | 5380237   | 3.4     | ENSSSCT00000000084 | .        | intron     | 0.21   | 298535      | rs7906      | 2 |
| AAAT.ATTT   | 5 | 5544371   | 5544387   | 4.25    | .                  | .        | intergenic | .      | rs790685073 | 2           |   |
| AC.GT       | 5 | 5557370   | 5557381   | 6       | .                  | .        | intergenic | 0.193  | rs790975584 | 2           |   |
| AAAAC.GTTTT | 5 | 5557816   | 5557838   | 3.83333 | .                  | .        | intergenic | 0.169  | rs789279659 | 2           |   |
| AC.GT       | 5 | 6020251   | 6020261   | 5.5     | .                  | .        | intergenic | 0.164  | rs790179919 | 2           |   |
| AG.CT       | 5 | 6291504   | 6291517   | 7       | .                  | .        | intergenic | .      | 356789      | rs7931      | 2 |
| AAAC.GTTT   | 5 | 6310628   | 6310644   | 4.25    | .                  | .        | intergenic | .      | rs790742556 | 4           |   |
| AC.GT       | 5 | 6504134   | 6504164   | 15.5    | .                  | .        | intergenic | -0.136 | .           | 2           |   |
| AAAC.GTTT   | 5 | 6678567   | 6678579   | 3.25    | .                  | .        | intergenic | .      | rs788590946 | 2           |   |
| AAAT.ATTT   | 5 | 6700767   | 6700778   | 3       | .                  | .        | intergenic | 0.144  | rs787561508 | 2           |   |
| AATC.GATT   | 5 | 7017545   | 7017576   | 8       | ENSSSCT00000022302 | PLA2G6   | intron     | .      | rs786564139 | 3           |   |
| AATC.GATT   | 5 | 7017545   | 7017576   | 8       | ENSSSCT00000000116 | PLA2G6   | intron     | .      | rs786564139 | 3           |   |
| AAAAC.GTTT  | 5 | 7791700   | 7791718   | 4.75    | .                  | .        | intergenic | .      | .           | 2           |   |
| AAC.GTT     | 5 | 7836333   | 7836352   | 6.66667 | .                  | .        | intergenic | .      | rs786693844 | 2           |   |
| AAGG.CCTT   | 5 | 8393382   | 8393395   | 3.5     | .                  | .        | intergenic | -0.091 | 359885      | rs7864      | 2 |
| AC.GT       | 5 | 8505212   | 8505221   | 5       | .                  | .        | intergenic | -0.285 | .           | 2           |   |
| AATG.CATT   | 5 | 8536292   | 8536318   | 6.75    | .                  | .        | intergenic | -0.038 | 308912      | rs7915      | 2 |
| AGAT.ATCT   | 5 | 8800627   | 8800638   | 3       | .                  | .        | intergenic | 0.135  | rs787425775 | 2           |   |
| AAAT.ATTT   | 5 | 9056157   | 9056183   | 6.75    | .                  | .        | intergenic | .      | 387194      | rs7882      | 2 |
| AAAC.GTTT   | 5 | 9354800   | 9354817   | 4.5     | .                  | .        | intergenic | -0.158 | rs789645502 | 2           |   |
| AGAT.ATCT   | 5 | 9407324   | 9407338   | 3.75    | ENSSSCT00000024278 | .        | intron     | 0.199  | rs786553023 | 2           |   |
| AAAAC.GTTTT | 5 | 10591248  | 10591278  | 6.2     | .                  | .        | intergenic | 0.15   | .           | 2           |   |
| AAAAG.CTTTT | 5 | 10595119  | 10595137  | 3.16667 | .                  | .        | intergenic | 0.072  | rs788666177 | 2           |   |
| AAAAC.GTTTT | 5 | 10605387  | 10605405  | 3.8     | .                  | .        | intergenic | 0.041  | rs788001243 | 2           |   |
| AG.CT       | 5 | 10681154  | 10681165  | 6       | .                  | .        | intergenic | -0.115 | rs787493435 | 2           |   |
| AT.AT       | 5 | 10740662  | 10740673  | 6       | .                  | .        | intergenic | .      | 394622      | rs7932      | 3 |
| AAAAC.GTTTT | 5 | 11002822  | 11002841  | 4       | .                  | .        | intergenic | .      | rs793622268 | 2           |   |
| AAAAC.GTTTT | 5 | 11595663  | 11595687  | 5       | .                  | .        | intergenic | -0.242 | rs790068249 | 2           |   |
| AATG.CATT   | 5 | 11665964  | 11665983  | 5       | ENSSSCT00000028759 | .        | intron     | -0.062 | .           | 2           |   |
| AG.CT       | 5 | 12205469  | 12205480  | 6       | .                  | .        | intergenic | 0.08   | rs789112376 | 2           |   |
| AG.CT       | 5 | 12280669  | 12280681  | 6.5     | ENSSSCT00000000162 | SYN3     | intron     | -0.065 | .           | 2           |   |
| AC.GT       | 5 | 12555925  | 12555937  | 6.5     | ENSSSCT00000000171 | BTBD11   | intron     | 0.045  | 230295      | rs7882      | 3 |
| AC.GT       | 5 | 12688682  | 12688694  | 6.5     | ENSSSCT00000000171 | BTBD11   | intron     | -0.058 | .           | 3           |   |
| AAT.ATT     | 5 | 12796399  | 12796415  | 5.66667 | ENSSSCT00000000171 | BTBD11   | intron     | -0.004 | rs789757747 | 2           |   |
| AC.GT       | 5 | 12863319  | 12863329  | 5.5     | ENSSSCT00000000171 | BTBD11   | intron     | 0.139  | rs791039369 | 2           |   |
| AAT.ATT     | 5 | 12882175  | 12882216  | 14      | ENSSSCT00000000171 | BTBD11   | intron     | .      | rs792254425 | 2           |   |
| AAAT.ATTT   | 5 | 12927310  | 12927323  | 3.5     | .                  | .        | intergenic | .      | .           | 2           |   |
| AC.GT       | 5 | 12988389  | 12988399  | 5.5     | .                  | .        | intergenic | -0.045 | .           | 2           |   |
| AAC.GTT     | 5 | 13174933  | 13174946  | 4.66667 | ENSSSCT00000000173 | CRY1     | intron     | .      | 348907      | rs7908      | 2 |
| AG.CT       | 5 | 13458979  | 13458991  | 6.5     | ENSSSCT00000000177 | RFX4     | intron     | 0.071  | rs790941400 | 2           |   |
| ACC.GGT     | 5 | 13473533  | 13473546  | 4.66667 | ENSSSCT00000000177 | RFX4     | intron     | 0.215  | 379284      | rs7933      | 2 |
| AT.AT       | 5 | 13491901  | 13491919  | 9.5     | ENSSSCT00000000177 | RFX4     | intron     | .      | rs790435213 | 2           |   |
| AAC.GTT     | 5 | 13567619  | 13567630  | 4       | .                  | .        | intergenic | 0.063  | 385995      | rs7922      | 2 |
| AAAC.GTTT   | 5 | 13578181  | 13578199  | 4.75    | .                  | .        | intergenic | 0.015  | rs789481293 | 2           |   |

|             |   |          |          |         |                    |          |            |        |                 |   |
|-------------|---|----------|----------|---------|--------------------|----------|------------|--------|-----------------|---|
| AG.CT       | 5 | 13581747 | 13581759 | 6.5     | .                  | .        | intergenic | -0.144 | rs699432491     | 2 |
| AG.CT       | 5 | 14116797 | 14116807 | 5.5     | .                  | .        | intergenic | -0.042 | .               | 2 |
| ACAT.ATGT   | 5 | 14141808 | 14141826 | 4.75    | .                  | .        | intergenic | 0.245  | rs786742196     | 2 |
| AAAG.CTTT   | 5 | 14211324 | 14211335 | 3       | .                  | .        | intergenic | 0.113  | .               | 2 |
| AC.GT       | 5 | 14355221 | 14355233 | 6.5     | .                  | .        | intergenic | -0.152 | rs791814139     | 2 |
| AG.CT       | 5 | 14510301 | 14510312 | 6       | .                  | .        | intergenic | -0.507 | rs788765438     | 2 |
| AG.CT       | 5 | 14828609 | 14828618 | 5       | .                  | .        | intergenic | -0.225 | rs792213669     | 2 |
| AT.AT       | 5 | 14836350 | 14836359 | 5       | .                  | .        | intergenic | .      | rs692763202     | 2 |
| AC.GT       | 5 | 15177959 | 15177968 | 5       | ENSSSCT00000000185 | CACNB3   | intron     | 1.164  | rs788831760     | 2 |
| AAAT.ATTT   | 5 | 15363580 | 15363597 | 4.5     | ENSSSCT00000000188 | CCDC65   | intron     | .      | rs791667725     | 2 |
| AATG.CATT   | 5 | 15622236 | 15622274 | 9.75    | .                  | .        | intergenic | .      | rs793599376     | 2 |
| AC.GT       | 5 | 15849304 | 15849319 | 8       | .                  | .        | intergenic | .      | rs24486 rs7888  | 3 |
| AC.GT       | 5 | 15955788 | 15955806 | 9.5     | ENSSSCT00000000212 | SPATS2   | intron     | .      | .               | 2 |
| AAAC.GTTT   | 5 | 16187602 | 16187627 | 6.5     | .                  | .        | intergenic | .      | .               | 3 |
| AAAC.GTTT   | 5 | 16556625 | 16556649 | 6.25    | ENSSSCT00000022818 | .        | intron     | 0.629  | rs790451643     | 2 |
| AG.CT       | 5 | 16580799 | 16580812 | 7       | .                  | .        | intergenic | 0.308  | rs13039 rs7924  | 2 |
| AAAC.GTT    | 5 | 16786055 | 16786069 | 5       | .                  | .        | intergenic | -0.078 | rs359644 rs7893 | 2 |
| AAAAC.GTTTT | 5 | 17128691 | 17128707 | 3.4     | ENSSSCT00000028346 | DIP2B    | intron     | -0.019 | rs353759 rs7930 | 2 |
| AAAAC.GTTTT | 5 | 17163086 | 17163109 | 4.8     | ENSSSCT00000028346 | DIP2B    | intron     | .      | .               | 2 |
| AAAAG.CTTTT | 5 | 17541169 | 17541190 | 3.66667 | .                  | .        | intergenic | 0.195  | rs792760808     | 2 |
| AAAC.GTTT   | 5 | 17570945 | 17570967 | 5.75    | ENSSSCT00000000245 | SCN8A    | intron     | 0.109  | rs791306152     | 2 |
| AAT.ATT     | 5 | 18445460 | 18445482 | 7.66667 | ENSSSCT00000000269 | KRT2     | intron     | -0.049 | rs219071 rs7871 | 2 |
| AC.GT       | 5 | 18582059 | 18582069 | 5.5     | .                  | .        | intergenic | -0.093 | .               | 2 |
| AAAC.GTTT   | 5 | 18765703 | 18765729 | 6.75    | .                  | .        | intergenic | 0.108  | rs787265951     | 2 |
| AAAAG.CTTTT | 5 | 19073340 | 19073366 | 4.5     | .                  | .        | intergenic | .      | rs579749 rs7866 | 2 |
| AAG.CTT     | 5 | 19180373 | 19180397 | 8.33333 | ENSSSCT00000000299 | .        | intron     | -0.054 | rs701145 rs7877 | 3 |
| AAG.CTT     | 5 | 19180373 | 19180397 | 8.33333 | ENSSSCT00000023450 | .        | intron     | -0.054 | rs701145 rs7877 | 3 |
| AAT.ATT     | 5 | 19302109 | 19302122 | 4.66667 | .                  | .        | intergenic | 0.29   | rs787057857     | 2 |
| AAAC.GTTT   | 5 | 19579071 | 19579089 | 4.75    | .                  | .        | intergenic | .      | rs792919399     | 2 |
| AC.GT       | 5 | 20459451 | 20459463 | 6.5     | ENSSSCT00000035821 | ITGA5    | intron     | -0.092 | rs140258 rs7864 | 3 |
| AC.GT       | 5 | 20459451 | 20459463 | 6.5     | ENSSSCT00000034427 | ITGA5    | intron     | -0.092 | rs140258 rs7864 | 3 |
| AC.GT       | 5 | 20459451 | 20459463 | 6.5     | ENSSSCT00000000314 | ITGA5    | intron     | -0.092 | rs140258 rs7864 | 3 |
| AC.GT       | 5 | 20459451 | 20459463 | 6.5     | ENSSSCT00000033141 | ITGA5    | promoter   | -0.092 | rs140258 rs7864 | 3 |
| AAAC.GTTT   | 5 | 20492473 | 20492505 | 8.25    | .                  | .        | intergenic | .      | rs789830913     | 2 |
| AAAC.GTTT   | 5 | 20706177 | 20706189 | 3.25    | .                  | .        | intergenic | .      | .               | 2 |
| ACAT.ATGT   | 5 | 20807336 | 20807351 | 4       | .                  | .        | intergenic | -0.147 | .               | 4 |
| AAAG.CTTT   | 5 | 21291321 | 21291340 | 5       | .                  | .        | intergenic | .      | rs357841 rs7891 | 2 |
| AAAAC.GTTTT | 5 | 22040301 | 22040315 | 3       | .                  | .        | intergenic | .      | .               | 2 |
| AAAC.GTTT   | 5 | 22403097 | 22403119 | 5.75    | .                  | .        | intergenic | .      | rs387560 rs7901 | 2 |
| AAAAC.GTTTT | 5 | 22740935 | 22740954 | 4       | .                  | .        | intergenic | 0.372  | rs793005507     | 2 |
| AC.GT       | 5 | 22811643 | 22811661 | 9.5     | ENSSSCT00000000393 | DGKA     | promoter   | 0.522  | .               | 2 |
| AAAAC.GTTTT | 5 | 23428609 | 23428638 | 5       | ENSSSCT00000000434 | RBMS2    | intron     | .      | rs786286424     | 2 |
| AC.GT       | 5 | 23610219 | 23610239 | 10.5    | ENSSSCT00000032195 | BAZ2A    | 3'utr      | 1.282  | .               | 2 |
| AC.GT       | 5 | 23610219 | 23610239 | 10.5    | ENSSSCT00000000436 | BAZ2A    | 3'utr      | 1.282  | .               | 2 |
| AG.CT       | 5 | 24138141 | 24138153 | 6.5     | ENSSSCT00000028141 | .        | intron     | -0.661 | .               | 2 |
| AC.GT       | 5 | 24511712 | 24511726 | 7.5     | ENSSSCT00000027063 | .        | intron     | 0.263  | .               | 3 |
| AT.AT       | 5 | 24835363 | 24835373 | 5.5     | ENSSSCT00000000478 | GLI1     | 3'utr      | .      | rs788073903     | 2 |
| AT.AT       | 5 | 24835363 | 24835373 | 5.5     | ENSSSCT00000000472 | .        | 3'utr      | .      | rs788073903     | 2 |
| AAAAT.ATTTT | 5 | 24919631 | 24919646 | 3.2     | .                  | .        | intergenic | 0.335  | .               | 3 |
| AAAC.GTTT   | 5 | 24920565 | 24920583 | 4.75    | .                  | .        | intergenic | 0.269  | rs790219891     | 2 |
| AAAC.GTTT   | 5 | 24974090 | 24974104 | 3.75    | ENSSSCT00000000489 | XRCC6BP1 | intron     | 0.067  | .               | 3 |
| AAT.ATT     | 5 | 25098125 | 25098140 | 5.33333 | .                  | .        | intergenic | -0.041 | .               | 2 |
| AG.CT       | 5 | 25152606 | 25152619 | 7       | .                  | .        | intergenic | 0.041  | rs776649 rs7885 | 2 |
| AAAC.GTTT   | 5 | 25194540 | 25194554 | 3.75    | .                  | .        | intergenic | 0.064  | .               | 3 |
| AG.CT       | 5 | 25206296 | 25206308 | 6.5     | .                  | .        | intergenic | 0.42   | rs787223154     | 2 |
| AAAAC.GTTTT | 5 | 25216496 | 25216510 | 3       | .                  | .        | intergenic | .      | .               | 2 |
| AAAAT.ATTTT | 5 | 25608249 | 25608268 | 4       | .                  | .        | intergenic | 0.119  | rs310540 rs7891 | 2 |
| AC.GT       | 5 | 25974711 | 25974734 | 12      | .                  | .        | intergenic | .      | rs369835 rs7091 | 4 |
| AAT.ATT     | 5 | 26576384 | 26576402 | 6.33333 | .                  | .        | intergenic | 0.162  | rs791275580     | 2 |
| AC.GT       | 5 | 26584159 | 26584180 | 11      | .                  | .        | intergenic | 0.11   | .               | 2 |
| AG.CT       | 5 | 26649914 | 26649933 | 10      | .                  | .        | intergenic | .      | rs395878 rs7918 | 2 |
| AAAT.ATTT   | 5 | 26879663 | 26879680 | 4.5     | .                  | .        | intergenic | .      | rs787574936     | 2 |
| AT.AT       | 5 | 26973839 | 26973848 | 5       | .                  | .        | intergenic | .      | rs158904 rs7880 | 3 |
| AAAG.CTTT   | 5 | 27000988 | 27001007 | 5       | .                  | .        | intergenic | -0.14  | rs787790445     | 2 |
| AT.AT       | 5 | 27056008 | 27056025 | 9       | .                  | .        | intergenic | 0.336  | .               | 4 |
| AAAC.GTTT   | 5 | 27172276 | 27172290 | 3.75    | .                  | .        | intergenic | .      | rs789879738     | 2 |
| AT.AT       | 5 | 27279805 | 27279814 | 5       | .                  | .        | intergenic | .      | rs791039313     | 2 |
| AT.AT       | 5 | 27292936 | 27292945 | 5       | .                  | .        | intergenic | .      | rs792362689     | 2 |
| AAAC.GTTT   | 5 | 27303885 | 27303908 | 6       | .                  | .        | intergenic | 0.3    | rs373994 rs7937 | 2 |
| AAAAC.GTTTT | 5 | 27477660 | 27477681 | 4.4     | .                  | .        | intergenic | .      | rs391081 rs7916 | 2 |
| AAAT.ATTT   | 5 | 27826224 | 27826238 | 3.75    | .                  | .        | intergenic | -0.051 | rs701609808     | 3 |
| AAAC.GTTT   | 5 | 27894546 | 27894558 | 3.25    | .                  | .        | intergenic | 0.499  | rs789225067     | 2 |
| AAG.CTT     | 5 | 27924137 | 27924152 | 5.33333 | .                  | .        | intergenic | 0.125  | rs787302028     | 4 |
| AT.AT       | 5 | 28159730 | 28159743 | 7       | .                  | .        | intergenic | .      | rs352197 rs7912 | 2 |
| AAAT.ATTT   | 5 | 28238832 | 28238854 | 5.75    | .                  | .        | intergenic | 0.056  | rs790124948     | 2 |
| AC.GT       | 5 | 28507676 | 28507688 | 6.5     | .                  | .        | intergenic | .      | .               | 2 |
| AT.AT       | 5 | 28537658 | 28537676 | 9.5     | .                  | .        | intergenic | .      | rs389885 rs7864 | 3 |
| AAAAG.CTTTT | 5 | 28882558 | 28882580 | 4.6     | .                  | .        | intergenic | .      | rs793420915     | 2 |
| AGG.CCT     | 5 | 29044428 | 29044446 | 6.33333 | .                  | .        | intergenic | -0.036 | rs789989604     | 3 |
| AAAAC.GTTTT | 5 | 29210231 | 29210257 | 5.4     | .                  | .        | intergenic | 0.037  | rs185295 rs7926 | 2 |
| AC.GT       | 5 | 29853024 | 29853038 | 7.5     | .                  | .        | intergenic | 0.222  | rs793567246     | 2 |
| AC.GT       | 5 | 30183337 | 30183363 | 13.5    | ENSSSCT00000029741 | .        | intron     | 1.026  | .               | 2 |
| AG.CT       | 5 | 30238992 | 30239005 | 7       | .                  | .        | intergenic | -0.034 | rs102319 rs7886 | 2 |
| AT.AT       | 5 | 30398998 | 30399009 | 6       | .                  | .        | intergenic | 0.126  | rs386751 rs7931 | 2 |

|             |   |          |          |         |                    |         |            |        |               |   |
|-------------|---|----------|----------|---------|--------------------|---------|------------|--------|---------------|---|
| AT.AT       | 5 | 31298702 | 31298720 | 9.5     | .                  | .       | intergenic | 0.014  | rs790241021   | 2 |
| AAC.GTT     | 5 | 31401697 | 31401717 | 7       | .                  | .       | intergenic | -0.11  | 772776 rs7923 | 2 |
| AAC.GTT     | 5 | 31431410 | 31431426 | 5.66667 | ENSSSCT00000020867 | U6      | promoter   | .      | rs792485779   | 2 |
| AAAT.ATTT   | 5 | 31462571 | 31462593 | 5.75    | .                  | .       | intergenic | .      | rs788870371   | 2 |
| AAAT.ATTT   | 5 | 31561893 | 31561906 | 3.5     | .                  | .       | intergenic | 0.235  | .             | 2 |
| AAAC.GTTT   | 5 | 31588670 | 31588694 | 6.25    | .                  | .       | intergenic | 0.068  | 399642 rs7902 | 2 |
| AAAAC.GTTTT | 5 | 31715933 | 31715958 | 5.2     | .                  | .       | intergenic | 0.055  | rs787035574   | 2 |
| AAC.GTT     | 5 | 31766269 | 31766280 | 4       | ENSSSCT00000025861 | SRGAP1  | intron     | 0.588  | rs789041469   | 2 |
| AAAC.GTTT   | 5 | 32221677 | 32221691 | 3.75    | ENSSSCT00000028687 | TBC1D30 | intron     | 0.147  | rs786770777   | 2 |
| AC.GT       | 5 | 32678916 | 32678930 | 7.5     | .                  | .       | intergenic | 0.081  | rs791671598   | 3 |
| AC.GT       | 5 | 32786347 | 32786367 | 10.5    | ENSSSCT00000000507 | LEMD3   | intron     | 0.427  | .             | 5 |
| AAC.GTT     | 5 | 33009949 | 33009965 | 5.66667 | .                  | .       | intergenic | 0.291  | rs789549514   | 3 |
| AC.GT       | 5 | 33036152 | 33036165 | 7       | ENSSSCT00000028225 | MSRB3   | intron     | 0.124  | 155300 rs7927 | 2 |
| AAG.CTT     | 5 | 33057948 | 33057962 | 5       | ENSSSCT00000028225 | MSRB3   | intron     | -0.009 | .             | 2 |
| AC.GT       | 5 | 33171312 | 33171326 | 7.5     | .                  | .       | intergenic | 0.133  | rs790427726   | 2 |
| AG.CT       | 5 | 33228316 | 33228325 | 5       | .                  | .       | intergenic | 0.052  | .             | 4 |
| AAC.GTT     | 5 | 33274093 | 33274106 | 4.66667 | .                  | .       | intergenic | .      | rs789529167   | 2 |
| AAAAC.GTTTT | 5 | 33276883 | 33276897 | 3       | .                  | .       | intergenic | .      | rs787016193   | 2 |
| AAAC.GTTT   | 5 | 33391263 | 33391279 | 4.25    | ENSSSCT00000000509 | HMGA2   | intron     | .      | 387815 rs7902 | 2 |
| AG.CT       | 5 | 33406060 | 33406070 | 5.5     | ENSSSCT00000000509 | HMGA2   | intron     | 0.708  | .             | 2 |
| AAAC.GTTT   | 5 | 33936717 | 33936730 | 3.5     | ENSSSCT00000000515 | HELB    | intron     | -0.066 | 319442 rs7867 | 2 |
| ACTC.GAGT   | 5 | 34211027 | 34211046 | 5       | ENSSSCT00000000516 | GRIP1   | intron     | 0.055  | rs789141965   | 2 |
| AAAAC.GTTTT | 5 | 34243841 | 34243859 | 3.8     | ENSSSCT00000000516 | GRIP1   | intron     | -0.071 | rs787356599   | 2 |
| AG.CT       | 5 | 34298935 | 34298946 | 6       | .                  | .       | intergenic | 0.061  | 125816 rs7903 | 2 |
| AAT.ATT     | 5 | 34389577 | 34389589 | 4.33333 | .                  | .       | intergenic | -0.281 | rs696456646   | 2 |
| AAAC.GTTT   | 5 | 34412269 | 34412291 | 5.75    | .                  | .       | intergenic | 0.051  | rs789370231   | 2 |
| AAAC.GTTT   | 5 | 34522475 | 34522492 | 4.5     | .                  | .       | intergenic | -0.074 | rs789436456   | 2 |
| AAAAC.GTTTT | 5 | 34573928 | 34573950 | 4.6     | .                  | .       | intergenic | 0.208  | .             | 2 |
| AAAAG.CTTTT | 5 | 34601439 | 34601470 | 6.4     | .                  | .       | intergenic | 0.184  | 396042 rs7918 | 2 |
| AAAT.ATTT   | 5 | 34833325 | 34833352 | 7       | .                  | .       | intergenic | 0.045  | rs711492149   | 2 |
| AC.GT       | 5 | 34862561 | 34862571 | 5.5     | .                  | .       | intergenic | 0.379  | 366950 rs7890 | 2 |
| AAAC.GTTT   | 5 | 35180908 | 35180932 | 6.25    | .                  | .       | intergenic | -0.078 | .             | 2 |
| AC.GT       | 5 | 35364312 | 35364322 | 5.5     | .                  | .       | intergenic | 0.038  | rs786896987   | 2 |
| CTCTC.GAGAG | 5 | 35540348 | 35540370 | 3.83333 | .                  | .       | intergenic | .      | .             | 2 |
| AC.GT       | 5 | 35810285 | 35810302 | 9       | ENSSSCT00000000524 | .       | intron     | 0.229  | rs793585266   | 3 |
| AC.GT       | 5 | 35962335 | 35962345 | 5.5     | ENSSSCT00000000526 | MDM2    | intron     | .      | rs788012636   | 2 |
| AT.AT       | 5 | 36113275 | 36113286 | 6       | .                  | .       | intergenic | 0.336  | rs788075889   | 3 |
| AC.GT       | 5 | 36182189 | 36182200 | 6       | ENSSSCT00000033585 | LYZ     | intron     | -0.106 | .             | 3 |
| AC.GT       | 5 | 36182189 | 36182200 | 6       | ENSSSCT00000034939 | LYZ     | intron     | -0.106 | .             | 3 |
| AC.GT       | 5 | 36182189 | 36182200 | 6       | ENSSSCT00000000530 | LYZ     | intron     | -0.106 | .             | 3 |
| AC.GT       | 5 | 36601044 | 36601053 | 5       | .                  | .       | intergenic | 0.07   | 368764 rs7933 | 3 |
| AAAC.GTTT   | 5 | 36686334 | 36686351 | 4.5     | ENSSSCT00000022623 | .       | intron     | .      | rs791374272   | 2 |
| AT.AT       | 5 | 36965115 | 36965124 | 5       | .                  | .       | intergenic | -0.01  | .             | 2 |
| AAAG.CTTT   | 5 | 37057701 | 37057712 | 3       | .                  | .       | intergenic | 0.31   | .             | 2 |
| AAG.CTT     | 5 | 37184310 | 37184323 | 4.66667 | ENSSSCT00000000541 | CNOT2   | intron     | 0.204  | rs793084428   | 3 |
| AC.GT       | 5 | 37191693 | 37191704 | 6       | ENSSSCT00000000541 | CNOT2   | intron     | 2.23   | 309398 rs7906 | 3 |
| AAAAC.GTTTT | 5 | 37233830 | 37233853 | 4       | .                  | .       | intergenic | 1.936  | 341253 rs7901 | 2 |
| AAAAC.GTTTT | 5 | 37275617 | 37275631 | 3       | ENSSSCT00000000543 | PTPRB   | intron     | 0.267  | .             | 2 |
| AC.GT       | 5 | 37405659 | 37405669 | 5.5     | ENSSSCT00000032079 | PTPRR   | intron     | 0.08   | 394799 rs7918 | 3 |
| AG.CT       | 5 | 37493335 | 37493356 | 11      | ENSSSCT00000032079 | PTPRR   | intron     | .      | 311453 rs6989 | 2 |
| AAAC.GTTT   | 5 | 37655578 | 37655592 | 3.75    | .                  | .       | intergenic | 0.149  | rs790948225   | 2 |
| AAC.GTT     | 5 | 37747133 | 37747155 | 7.66667 | .                  | .       | intergenic | -0.064 | rs789047498   | 2 |
| AT.AT       | 5 | 37767936 | 37767946 | 5.5     | .                  | .       | intergenic | -0.279 | rs791041653   | 2 |
| AATG.CATT   | 5 | 37852000 | 37852019 | 5       | .                  | .       | intergenic | 0.023  | rs787818634   | 2 |
| AG.CT       | 5 | 37901119 | 37901133 | 7.5     | .                  | .       | intergenic | .      | 319093 rs7901 | 2 |
| AGAT.ATCT   | 5 | 38069714 | 38069750 | 9.25    | .                  | .       | intergenic | .      | rs787713533   | 2 |
| AAAT.ATTT   | 5 | 38357105 | 38357126 | 5.5     | ENSSSCT00000000548 | .       | intron     | -0.01  | 352081 rs7882 | 2 |
| ACAT.ATGT   | 5 | 38359551 | 38359566 | 4       | ENSSSCT00000000548 | .       | intron     | 0.217  | 109111 rs7902 | 2 |
| AAT.ATT     | 5 | 38476956 | 38476972 | 5.66667 | ENSSSCT00000000550 | RAB21   | intron     | 0.303  | .             | 2 |
| AC.GT       | 5 | 38599574 | 38599585 | 6       | ENSSSCT00000000551 | TBC1D15 | intron     | 0.134  | .             | 3 |
| AT.AT       | 5 | 38612650 | 38612669 | 10      | .                  | .       | intergenic | -0.048 | rs790448401   | 2 |
| AC.GT       | 5 | 38695065 | 38695084 | 10      | ENSSSCT00000000553 | TPH2    | intron     | 0.644  | rs792164470   | 2 |
| AT.AT       | 5 | 39099742 | 39099753 | 6       | ENSSSCT00000000555 | TRH-DE  | intron     | 0.45   | 787906 rs7931 | 2 |
| AAAAT.ATTTT | 5 | 39147598 | 39147622 | 5       | ENSSSCT00000000555 | TRH-DE  | intron     | .      | 346637 rs7881 | 2 |
| AAAAT.ATTTT | 5 | 39160393 | 39160417 | 5       | ENSSSCT00000000555 | TRH-DE  | intron     | 0.096  | 291485 rs7905 | 2 |
| AATC.GATT   | 5 | 39271011 | 39271029 | 4.75    | ENSSSCT00000000555 | TRH-DE  | intron     | 0.28   | rs787600447   | 2 |
| AC.GT       | 5 | 39288339 | 39288350 | 6       | ENSSSCT00000000555 | TRH-DE  | intron     | 0.048  | rs787442755   | 2 |
| AAAAC.GTTTT | 5 | 39333482 | 39333506 | 4.16667 | ENSSSCT00000000555 | TRH-DE  | intron     | -0.04  | rs787954421   | 4 |
| AAC.GTT     | 5 | 39371033 | 39371052 | 6.66667 | ENSSSCT00000000555 | TRH-DE  | intron     | 0.192  | .             | 2 |
| AC.GT       | 5 | 39490521 | 39490537 | 8.5     | ENSSSCT00000000555 | TRH-DE  | intron     | 0.142  | rs792906584   | 2 |
| AAC.GTT     | 5 | 39506558 | 39506579 | 7.33333 | ENSSSCT00000000555 | TRH-DE  | intron     | .      | rs788671838   | 2 |
| AC.GT       | 5 | 39515548 | 39515565 | 9       | ENSSSCT00000000555 | TRH-DE  | intron     | .      | rs790648064   | 6 |
| AAT.ATT     | 5 | 39603525 | 39603536 | 4       | .                  | .       | intergenic | 0.085  | .             | 2 |
| AAG.CTT     | 5 | 39610349 | 39610361 | 4.33333 | .                  | .       | intergenic | .      | rs790195309   | 2 |
| AAC.GTT     | 5 | 39699372 | 39699391 | 6.66667 | .                  | .       | intergenic | .      | 792332 rs7875 | 3 |
| AAAC.GTTT   | 5 | 40139752 | 40139767 | 4       | .                  | .       | intergenic | -0.189 | rs790442389   | 2 |
| AAAAT.ATTTT | 5 | 40302898 | 40302923 | 5.2     | .                  | .       | intergenic | .      | 172994 rs7902 | 2 |
| AC.GT       | 5 | 40321169 | 40321190 | 11      | .                  | .       | intergenic | -0.009 | 115590 rs7915 | 3 |
| AAT.ATT     | 5 | 40336325 | 40336336 | 4       | .                  | .       | intergenic | 0.061  | rs789673277   | 2 |
| AT.AT       | 5 | 40355074 | 40355083 | 5       | .                  | .       | intergenic | .      | rs787076393   | 2 |
| AAAG.CTTT   | 5 | 40785121 | 40785135 | 3.75    | .                  | .       | intergenic | 0.118  | .             | 2 |
| AT.AT       | 5 | 40897041 | 40897051 | 5.5     | .                  | .       | intergenic | 0.096  | .             | 2 |
| AAAC.GTTT   | 5 | 41432611 | 41432629 | 4.75    | .                  | .       | intergenic | -0.041 | 389135 rs7870 | 2 |
| AAAGG.CCTTT | 5 | 41433301 | 41433318 | 3.6     | .                  | .       | intergenic | 0.031  | 319818 rs7924 | 2 |

|             |   |          |          |         |                    |         |            |        |               |   |
|-------------|---|----------|----------|---------|--------------------|---------|------------|--------|---------------|---|
| AAAC.GTTT   | 5 | 41440160 | 41440182 | 5.75    | .                  | .       | intergenic | 0.093  | rs708752907   | 2 |
| AC.GT       | 5 | 41664172 | 41664198 | 13.5    | .                  | .       | intergenic | -0.096 | rs786503046   | 3 |
| AAAC.GTTT   | 5 | 41697137 | 41697157 | 5.25    | .                  | .       | intergenic | 0.175  | rs791777335   | 2 |
| AAT.ATT     | 5 | 42317040 | 42317054 | 5       | .                  | .       | intergenic | 0.079  | 323202 rs7876 | 2 |
| AT.AT       | 5 | 42378896 | 42378918 | 11.5    | ENSSSCT00000000562 | KRR1    | intron     | 0      | 168676 rs7897 | 2 |
| AG.CT       | 5 | 42450307 | 42450322 | 8       | .                  | .       | intergenic | 0.231  | .             | 2 |
| AT.AT       | 5 | 42491107 | 42491117 | 5.5     | .                  | .       | intergenic | 0.137  | 351470 rs7904 | 2 |
| AACT.AGTTT  | 5 | 42695366 | 42695396 | 6.2     | .                  | .       | intergenic | -0.281 | rs789911009   | 2 |
| AT.AT       | 5 | 42766377 | 42766387 | 5.5     | .                  | .       | intergenic | 0.583  | 765195 rs7891 | 2 |
| AG.CT       | 5 | 42964334 | 42964355 | 11      | .                  | .       | intergenic | 0.077  | 339647 rs7879 | 2 |
| AAAT.ATTT   | 5 | 43032537 | 43032550 | 3.5     | .                  | .       | intergenic | 0.095  | rs791403267   | 2 |
| AAAAC.GTTTT | 5 | 43306894 | 43306909 | 3.2     | ENSSSCT00000029484 | OSBPL8  | intron     | 0.269  | .             | 2 |
| AAAT.ATTT   | 5 | 43988807 | 43988820 | 3.5     | .                  | .       | intergenic | .      | .             | 3 |
| ACAT.ATGT   | 5 | 44073284 | 44073306 | 5.75    | .                  | .       | intergenic | .      | 281068 rs7868 | 2 |
| AAAC.GTTT   | 5 | 44087608 | 44087629 | 5.5     | .                  | .       | intergenic | .      | rs789357703   | 2 |
| AAAT.ATTT   | 5 | 44101615 | 44101637 | 5.75    | .                  | .       | intergenic | 0.014  | rs792393451   | 2 |
| AAC.GTT     | 5 | 44541480 | 44541491 | 4       | .                  | .       | intergenic | 0.18   | .             | 2 |
| AAAC.GTTT   | 5 | 44588740 | 44588756 | 4.25    | ENSSSCT00000000570 | PKP2    | intron     | -0.119 | 377368 rs7878 | 2 |
| AT.AT       | 5 | 44710359 | 44710370 | 6       | .                  | .       | intergenic | 0.212  | 361092 rs7921 | 3 |
| AAAT.ATTT   | 5 | 44763382 | 44763400 | 4.75    | ENSSSCT00000000571 | .       | intron     | .      | .             | 3 |
| AAAT.ATTT   | 5 | 44763382 | 44763400 | 4.75    | ENSSSCT00000030054 | .       | intron     | .      | .             | 3 |
| AACC.GGTT   | 5 | 44886260 | 44886284 | 6.25    | ENSSSCT00000031839 | .       | intron     | -0.214 | 304868 rs7917 | 2 |
| AAT.ATT     | 5 | 44932344 | 44932361 | 6       | ENSSSCT00000031839 | .       | intron     | 0.051  | rs790230710   | 3 |
| AAT.ATT     | 5 | 44932344 | 44932361 | 6       | ENSSSCT00000000572 | FGD4    | promoter   | 0.051  | rs790230710   | 3 |
| AAT.ATT     | 5 | 44932344 | 44932361 | 6       | ENSSSCT00000036458 | FGD4    | promoter   | 0.051  | rs790230710   | 3 |
| AAAG.CTTT   | 5 | 45536934 | 45536949 | 4       | .                  | .       | intergenic | .      | rs786337738   | 2 |
| AG.CT       | 5 | 46610527 | 46610539 | 6.5     | .                  | .       | intergenic | .      | rs787073657   | 2 |
| AT.AT       | 5 | 46649857 | 46649867 | 5.5     | .                  | .       | intergenic | .      | rs790522238   | 2 |
| AAAAC.GTTTT | 5 | 47129181 | 47129201 | 3.5     | .                  | .       | intergenic | 0.15   | 354703 rs7883 | 2 |
| AC.GT       | 5 | 47171854 | 47171872 | 9.5     | .                  | .       | intergenic | 0.174  | rs791858767   | 2 |
| AAAT.ATTT   | 5 | 47422864 | 47422887 | 6       | ENSSSCT00000028514 | .       | promoter   | .      | 168510 rs7903 | 2 |
| AT.AT       | 5 | 47548107 | 47548119 | 6.5     | ENSSSCT00000000582 | OVCH1   | intron     | .      | rs790736162   | 2 |
| AAAT.ATTT   | 5 | 47662507 | 47662525 | 4.75    | ENSSSCT00000000578 | ERGIC2  | intron     | 0.144  | rs789788826   | 2 |
| AC.GT       | 5 | 48000562 | 48000574 | 6.5     | .                  | .       | intergenic | .      | 365422 rs7923 | 2 |
| AC.GT       | 5 | 48242996 | 48243008 | 6.5     | .                  | .       | intergenic | 1.585  | rs786390287   | 2 |
| AT.AT       | 5 | 48244327 | 48244341 | 7.5     | .                  | .       | intergenic | .      | rs791886668   | 2 |
| AGGG.CCCT   | 5 | 48270418 | 48270445 | 7       | .                  | .       | intergenic | .      | .             | 2 |
| AAC.GTT     | 5 | 48538424 | 48538446 | 7.66667 | .                  | .       | intergenic | .      | rs703333250   | 3 |
| AC.GT       | 5 | 48800401 | 48800413 | 6.5     | .                  | .       | intergenic | 0.16   | rs789408815   | 4 |
| AAAT.ATTT   | 5 | 49271054 | 49271075 | 5.5     | .                  | .       | intergenic | .      | rs790321352   | 2 |
| AAC.GTT     | 5 | 49444612 | 49444627 | 5.33333 | .                  | .       | intergenic | .      | rs791433919   | 2 |
| AAAC.GTTT   | 5 | 49511773 | 49511787 | 3.75    | ENSSSCT00000000588 | KLHL42  | intron     | 0.038  | rs791234072   | 2 |
| AAAC.GTTT   | 5 | 49618912 | 49618937 | 6.5     | ENSSSCT00000027008 | PPFIBP1 | intron     | 0.222  | 323936 rs7904 | 2 |
| AAAC.GTTT   | 5 | 49618912 | 49618937 | 6.5     | ENSSSCT00000000592 | PPFIBP1 | intron     | 0.222  | 323936 rs7904 | 2 |
| AAAC.GTTT   | 5 | 49618912 | 49618937 | 6.5     | ENSSSCT00000031448 | PPFIBP1 | intron     | 0.222  | 323936 rs7904 | 2 |
| AAC.GTT     | 5 | 50138288 | 50138309 | 7.33333 | .                  | .       | intergenic | .      | rs790851123   | 2 |
| AAC.GTT     | 5 | 50384927 | 50384944 | 6       | ENSSSCT00000031326 | ASUN    | intron     | .      | rs791954785   | 2 |
| AAAC.GTTT   | 5 | 50398783 | 50398796 | 3.5     | ENSSSCT00000031326 | ASUN    | intron     | 0.047  | rs789249126   | 2 |
| AAAC.GTTT   | 5 | 51525324 | 51525342 | 4.75    | ENSSSCT00000000602 | RASSF8  | intron     | 0.12   | rs791460113   | 3 |
| AAGG.CCTT   | 5 | 51631090 | 51631111 | 5.5     | .                  | .       | intergenic | .      | rs696122658   | 2 |
| AC.GT       | 5 | 51998912 | 51998927 | 8       | .                  | .       | intergenic | .      | 105604 rs7910 | 2 |
| AG.CT       | 5 | 52107206 | 52107221 | 8       | .                  | .       | intergenic | -0.594 | rs793572838   | 2 |
| AAAT.ATTT   | 5 | 52253996 | 52254018 | 5.75    | ENSSSCT00000025989 | KRAS    | intron     | 0.536  | rs793861932   | 2 |
| AAG.CTT     | 5 | 52838182 | 52838205 | 8       | .                  | .       | intergenic | 0.173  | rs791553967   | 2 |
| AG.CT       | 5 | 52883414 | 52883432 | 9.5     | .                  | .       | intergenic | 0.101  | rs790965057   | 2 |
| AT.AT       | 5 | 53205293 | 53205304 | 6       | .                  | .       | intergenic | -0.08  | rs786936851   | 2 |
| AAAAC.GTTTT | 5 | 53305701 | 53305724 | 4.8     | .                  | .       | intergenic | 0.158  | 117186 rs7926 | 3 |
| AC.GT       | 5 | 53375479 | 53375493 | 7.5     | .                  | .       | intergenic | -0.194 | .             | 3 |
| AC.GT       | 5 | 53718466 | 53718480 | 7.5     | .                  | .       | intergenic | -0.069 | .             | 3 |
| AAC.GTT     | 5 | 53787480 | 53787492 | 4.33333 | .                  | .       | intergenic | -0.081 | rs791229785   | 2 |
| AT.AT       | 5 | 53791359 | 53791368 | 5       | .                  | .       | intergenic | 0.3    | rs787778496   | 2 |
| AAAG.CTTT   | 5 | 53844213 | 53844245 | 8.25    | .                  | .       | intergenic | 0.437  | 354317 rs7920 | 2 |
| AAAT.ATTT   | 5 | 53871917 | 53871936 | 5       | .                  | .       | intergenic | .      | rs792563610   | 2 |
| AAGT.ACTT   | 5 | 53910190 | 53910201 | 3       | .                  | .       | intergenic | 0.029  | .             | 2 |
| AC.GT       | 5 | 54101821 | 54101833 | 6.5     | .                  | .       | intergenic | 0.075  | rs789405302   | 2 |
| AAAC.GTTT   | 5 | 54328697 | 54328731 | 8.75    | .                  | .       | intergenic | 0.979  | rs793617609   | 2 |
| AAAAC.GTTTT | 5 | 54660455 | 54660477 | 3.83333 | .                  | .       | intergenic | -0.167 | rs788974012   | 2 |
| AAAC.GTTT   | 5 | 54777123 | 54777139 | 4.25    | .                  | .       | intergenic | 0.217  | rs788401105   | 2 |
| AAAC.GTTT   | 5 | 54947959 | 54947980 | 5.5     | .                  | .       | intergenic | 0.005  | 394962 rs7931 | 3 |
| AT.AT       | 5 | 55084616 | 55084626 | 5.5     | .                  | .       | intergenic | 0.169  | rs788722005   | 2 |
| AAAAC.GTTTT | 5 | 55170394 | 55170420 | 5.4     | ENSSSCT00000000621 | GYS2    | intron     | .      | rs792063776   | 2 |
| AAAC.GTTT   | 5 | 55333293 | 55333307 | 3.75    | .                  | .       | intergenic | 0.02   | rs790298794   | 2 |
| AC.GT       | 5 | 55483396 | 55483406 | 5.5     | .                  | .       | intergenic | .      | .             | 4 |
| AAAAC.GTTTT | 5 | 55695115 | 55695133 | 3.8     | .                  | .       | intergenic | .      | rs787734815   | 2 |
| AAAAC.GTTTT | 5 | 55809557 | 55809590 | 6.8     | ENSSSCT00000027940 | .       | intron     | 0.103  | rs791598239   | 2 |
| ACAT.ATGT   | 5 | 55819066 | 55819096 | 7.75    | ENSSSCT00000027940 | .       | intron     | 0.033  | rs790420648   | 2 |
| AC.GT       | 5 | 56114174 | 56114196 | 11.5    | .                  | .       | intergenic | .      | rs790113860   | 2 |
| AG.CT       | 5 | 56161994 | 56162010 | 8.5     | .                  | .       | intergenic | .      | rs787871933   | 2 |
| AAAC.GTTT   | 5 | 56236402 | 56236417 | 4       | .                  | .       | intergenic | .      | rs789188126   | 2 |
| AT.AT       | 5 | 56479762 | 56479772 | 5.5     | .                  | .       | intergenic | .      | rs789535652   | 4 |
| AC.GT       | 5 | 56703873 | 56703884 | 6       | .                  | .       | intergenic | 0.017  | rs792346090   | 2 |
| AAAC.GTTT   | 5 | 56831159 | 56831176 | 4.5     | .                  | .       | intergenic | 0.274  | 104590 rs7936 | 2 |
| AC.GT       | 5 | 56968177 | 56968195 | 9.5     | ENSSSCT00000000632 | AEBP2   | intron     | 0.18   | .             | 3 |
| AAAC.GTTT   | 5 | 56977443 | 56977461 | 4.75    | ENSSSCT00000000632 | AEBP2   | intron     | -0.109 | 376177 rs7868 | 2 |

|             |   |          |          |         |                    |         |            |        |                 |   |
|-------------|---|----------|----------|---------|--------------------|---------|------------|--------|-----------------|---|
| AAAC.GTTT   | 5 | 57002078 | 57002099 | 5.5     | .                  | .       | intergenic | 0.083  | rs792524450     | 2 |
| AAAC.GTTT   | 5 | 57075331 | 57075357 | 6.75    | ENSSSCT00000000633 | .       | intron     | -0.061 | rs789182217     | 2 |
| AG.CT       | 5 | 57139998 | 57140008 | 5.5     | ENSSSCT00000000633 | .       | intron     | 0.17   | rs792370941     | 2 |
| AT.AT       | 5 | 57207395 | 57207408 | 7       | .                  | .       | intergenic | 0.047  | rs789265256     | 3 |
| AAAT.ATTT   | 5 | 57215150 | 57215173 | 6       | .                  | .       | intergenic | -0.063 | rs792187995     | 2 |
| AAAC.GTTT   | 5 | 57218740 | 57218758 | 4.75    | .                  | .       | intergenic | 0.03   | rs161000 rs7931 | 4 |
| AAAT.ATTT   | 5 | 57271827 | 57271841 | 3.75    | .                  | .       | intergenic | 0.016  | rs283973 rs7913 | 2 |
| AG.CT       | 5 | 57539939 | 57539957 | 9.5     | .                  | .       | intergenic | 0.08   | rs793216505     | 2 |
| AT.AT       | 5 | 57654693 | 57654706 | 7       | .                  | .       | intergenic | 0.064  | rs17309 rs7926  | 2 |
| AC.GT       | 5 | 57678205 | 57678221 | 8.5     | .                  | .       | intergenic | -0.031 | rs792398517     | 2 |
| AAG.CTT     | 5 | 57705137 | 57705149 | 4.33333 | ENSSSCT00000000635 | PLCZ1   | intron     | -0.181 | rs787313793     | 2 |
| AAC.GTT     | 5 | 57875505 | 57875524 | 6.66667 | ENSSSCT00000031285 | PIK3C2G | intron     | 0.025  | rs786500379     | 3 |
| AAC.GTT     | 5 | 57875505 | 57875524 | 6.66667 | ENSSSCT00000000636 | PIK3C2G | intron     | 0.025  | rs786500379     | 3 |
| AAC.GTT     | 5 | 57875505 | 57875524 | 6.66667 | ENSSSCT00000027538 | PIK3C2G | intron     | 0.025  | rs786500379     | 3 |
| AAAC.GTTT   | 5 | 57880580 | 57880610 | 7.75    | ENSSSCT00000031285 | PIK3C2G | intron     | -0.012 | rs790745872     | 2 |
| AAAC.GTTT   | 5 | 57880580 | 57880610 | 7.75    | ENSSSCT00000000636 | PIK3C2G | intron     | -0.012 | rs790745872     | 2 |
| AAAC.GTTT   | 5 | 57880580 | 57880610 | 7.75    | ENSSSCT00000027538 | PIK3C2G | intron     | -0.012 | rs790745872     | 2 |
| AC.GT       | 5 | 58280881 | 58280891 | 5.5     | .                  | .       | intergenic | 0.061  | .               | 3 |
| AAAC.GTTT   | 5 | 58296248 | 58296275 | 7       | .                  | .       | intergenic | .      | rs790214617     | 2 |
| AG.CT       | 5 | 58327749 | 58327764 | 8       | .                  | .       | intergenic | 0.224  | rs793271519     | 5 |
| AG.CT       | 5 | 58399288 | 58399299 | 6       | .                  | .       | intergenic | -0.076 | .               | 4 |
| AATC.GATT   | 5 | 58402884 | 58402907 | 6       | .                  | .       | intergenic | -0.066 | rs792850416     | 2 |
| AC.GT       | 5 | 58576414 | 58576432 | 9.5     | .                  | .       | intergenic | -0.09  | rs789976205     | 2 |
| AT.AT       | 5 | 58641927 | 58641941 | 7.5     | .                  | .       | intergenic | 0.058  | rs792416349     | 2 |
| AAC.GTT     | 5 | 59027724 | 59027745 | 7.33333 | .                  | .       | intergenic | .      | rs786863185     | 2 |
| AT.AT       | 5 | 59106173 | 59106183 | 5.5     | .                  | .       | intergenic | 0.584  | rs787509732     | 2 |
| AT.AT       | 5 | 59298521 | 59298530 | 5       | .                  | .       | intergenic | 0.083  | rs792431406     | 2 |
| AG.CT       | 5 | 59321546 | 59321555 | 5       | .                  | .       | intergenic | 1.336  | rs789456714     | 2 |
| AG.CT       | 5 | 59433199 | 59433223 | 12.5    | .                  | .       | intergenic | 0.097  | rs791481984     | 2 |
| AAAC.GTTT   | 5 | 59615080 | 59615111 | 8       | .                  | .       | intergenic | 0.466  | rs718007 rs7864 | 2 |
| AC.GT       | 5 | 59647563 | 59647577 | 7.5     | ENSSSCT00000000643 | SLC15A5 | promoter   | .      | .               | 2 |
| AC.GT       | 5 | 59649191 | 59649216 | 13      | ENSSSCT00000000643 | SLC15A5 | promoter   | 1.192  | rs788035808     | 2 |
| AG.CT       | 5 | 59711975 | 59711989 | 7.5     | ENSSSCT00000000643 | SLC15A5 | intron     | -0.015 | rs789697643     | 2 |
| AAG.CTT     | 5 | 59765979 | 59766003 | 8.33333 | .                  | .       | intergenic | 0.485  | rs787690384     | 3 |
| AC.GT       | 5 | 60192297 | 60192307 | 5.5     | .                  | .       | intergenic | .      | .               | 3 |
| AG.CT       | 5 | 60294076 | 60294086 | 5.5     | .                  | .       | intergenic | -0.353 | rs787514915     | 2 |
| AC.GT       | 5 | 60316124 | 60316141 | 9       | ENSSSCT00000000645 | .       | intron     | 0.544  | rs396185 rs7865 | 2 |
| AAAC.GTTT   | 5 | 60365584 | 60365617 | 8.5     | ENSSSCT00000000645 | .       | intron     | 0.029  | rs791115998     | 2 |
| AC.GT       | 5 | 60491369 | 60491381 | 6.5     | ENSSSCT00000027092 | .       | intron     | 1.45   | .               | 3 |
| AC.GT       | 5 | 60501932 | 60501960 | 14.5    | ENSSSCT00000027092 | .       | intron     | .      | .               | 3 |
| AAC.GTT     | 5 | 60504262 | 60504275 | 4.66667 | ENSSSCT00000027092 | .       | intron     | 0.023  | rs791232359     | 2 |
| AT.AT       | 5 | 60582290 | 60582301 | 6       | .                  | .       | intergenic | 0.155  | rs790422519     | 2 |
| AAG.CTT     | 5 | 60629468 | 60629484 | 5.66667 | .                  | .       | intergenic | 0.101  | rs301323 rs7869 | 2 |
| AG.CT       | 5 | 60748295 | 60748322 | 14      | ENSSSCT00000000647 | RERG    | intron     | 0.735  | rs793211587     | 3 |
| AC.GT       | 5 | 60755669 | 60755680 | 6       | ENSSSCT00000000647 | RERG    | intron     | 0.013  | rs790351603     | 2 |
| AAAAC.GTTTT | 5 | 60825047 | 60825067 | 3.5     | ENSSSCT00000000647 | RERG    | intron     | -0.044 | rs109014 rs7918 | 2 |
| ATCC.GGAT   | 5 | 60827344 | 60827361 | 4.5     | ENSSSCT00000000647 | RERG    | intron     | -0.003 | .               | 2 |
| AAAG.CTTT   | 5 | 60865139 | 60865165 | 6.75    | .                  | .       | intergenic | 0.227  | rs790361374     | 2 |
| AAAC.GTTT   | 5 | 60884578 | 60884601 | 6       | .                  | .       | intergenic | -0.018 | rs786397930     | 2 |
| AG.CT       | 5 | 60933457 | 60933467 | 5.5     | .                  | .       | intergenic | 0.069  | .               | 2 |
| AC.GT       | 5 | 60975661 | 60975670 | 5       | ENSSSCT00000000649 | ARHGDI  | intron     | 1.565  | rs786598512     | 2 |
| AC.GT       | 5 | 60978296 | 60978310 | 7.5     | ENSSSCT00000000649 | ARHGDI  | intron     | 0.059  | rs787673295     | 2 |
| ACC.GGT     | 5 | 61080613 | 61080625 | 4.33333 | .                  | .       | intergenic | 0.088  | rs192492 rs7911 | 2 |
| AG.CT       | 5 | 61414619 | 61414634 | 8       | .                  | .       | intergenic | .      | .               | 3 |
| AC.GT       | 5 | 61444369 | 61444383 | 7.5     | ENSSSCT00000000658 | ATF7IP  | 3'utr      | 1.93   | .               | 3 |
| AC.GT       | 5 | 61444369 | 61444383 | 7.5     | ENSSSCT00000022782 | ATF7IP  | 3'utr      | 1.93   | .               | 3 |
| AAC.GTT     | 5 | 61877438 | 61877454 | 5.66667 | .                  | .       | intergenic | 0.404  | rs789418723     | 2 |
| AC.GT       | 5 | 61917578 | 61917588 | 5.5     | .                  | .       | intergenic | 0.317  | .               | 4 |
| AC.GT       | 5 | 62351996 | 62352010 | 7.5     | .                  | .       | intergenic | 0.131  | .               | 2 |
| AC.GT       | 5 | 62444185 | 62444197 | 6.5     | .                  | .       | intergenic | 0.013  | rs786443298     | 3 |
| AAT.ATT     | 5 | 62528315 | 62528332 | 6       | .                  | .       | intergenic | 0.233  | rs793780894     | 2 |
| AAAT.ATTT   | 5 | 62638880 | 62638903 | 6       | .                  | .       | intergenic | -0.089 | rs262287 rs7929 | 2 |
| AG.CT       | 5 | 63075232 | 63075242 | 5.5     | .                  | .       | intergenic | 0.209  | rs788737517     | 5 |
| ATCC.GGAT   | 5 | 63185951 | 63185986 | 9       | ENSSSCT00000031037 | ETV6    | intron     | 0.013  | rs315801 rs7885 | 2 |
| AG.CT       | 5 | 63215970 | 63215979 | 5       | ENSSSCT00000031037 | ETV6    | intron     | -0.074 | .               | 2 |
| AG.CT       | 5 | 63234730 | 63234743 | 7       | ENSSSCT00000031037 | ETV6    | intron     | .      | rs793715192     | 3 |
| AAT.ATT     | 5 | 63235580 | 63235593 | 4.66667 | ENSSSCT00000031037 | ETV6    | intron     | 0.186  | rs790377810     | 2 |
| AAAC.GTTT   | 5 | 63239469 | 63239483 | 3.75    | ENSSSCT00000031037 | ETV6    | intron     | -0.145 | rs793559511     | 2 |
| AGGG.CCCT   | 5 | 63248284 | 63248303 | 5       | ENSSSCT00000031037 | ETV6    | intron     | 0.777  | rs787448705     | 2 |
| AG.CT       | 5 | 63300016 | 63300027 | 6       | ENSSSCT00000031037 | ETV6    | intron     | -0.057 | rs790858751     | 2 |
| AAAC.GTTT   | 5 | 63592694 | 63592723 | 7.5     | ENSSSCT00000000671 | LRP6    | intron     | .      | rs793700854     | 3 |
| AG.CT       | 5 | 63711797 | 63711815 | 9.5     | ENSSSCT00000000669 | BCL2L14 | intron     | -0.062 | rs792818606     | 2 |
| AAAC.GTTT   | 5 | 63971735 | 63971760 | 6.5     | .                  | .       | intergenic | .      | rs786924178     | 2 |
| AT.AT       | 5 | 63976656 | 63976668 | 6.5     | ENSSSCT00000000678 | TAS2R9  | promoter   | -0.111 | rs32659 rs7914  | 3 |
| AG.CT       | 5 | 63997225 | 63997237 | 6.5     | .                  | .       | intergenic | .      | rs352750 rs7907 | 2 |
| AC.GT       | 5 | 64132941 | 64132955 | 7.5     | ENSSSCT00000000681 | STYK1   | intron     | 0.125  | rs34258 rs7937  | 2 |
| AC.GT       | 5 | 64159002 | 64159012 | 5.5     | .                  | .       | intergenic | 0.017  | rs788817730     | 2 |
| AG.CT       | 5 | 64343133 | 64343146 | 7       | .                  | .       | intergenic | .      | rs787533810     | 2 |
| AG.CT       | 5 | 64414198 | 64414208 | 5.5     | .                  | .       | intergenic | 0.017  | rs788257786     | 2 |
| AG.CT       | 5 | 64521553 | 64521562 | 5       | ENSSSCT00000000703 | CLEC1A  | intron     | 0.464  | rs145047 rs7888 | 4 |
| AG.CT       | 5 | 64521553 | 64521562 | 5       | ENSSSCT00000027764 | CLEC1A  | intron     | 0.464  | rs145047 rs7888 | 4 |
| AT.AT       | 5 | 64549810 | 64549835 | 13      | ENSSSCT00000033773 | CLEC7A  | intron     | 0.018  | .               | 4 |
| AT.AT       | 5 | 64549810 | 64549835 | 13      | ENSSSCT00000000700 | CLEC7A  | intron     | 0.018  | .               | 4 |
| AT.AT       | 5 | 64549810 | 64549835 | 13      | ENSSSCT00000000699 | CLEC7A  | intron     | 0.018  | .               | 4 |

|              |   |          |          |         |                     |          |            |        |                 |   |
|--------------|---|----------|----------|---------|---------------------|----------|------------|--------|-----------------|---|
| AT.AT        | 5 | 64549810 | 64549835 | 13      | ENSSSCT00000000701  | CLEC7A   | intron     | 0.018  | .               | 4 |
| AT.AT        | 5 | 64549810 | 64549835 | 13      | ENSSSCT000000033700 | CLEC7A   | intron     | 0.018  | .               | 4 |
| AG.CT        | 5 | 64552169 | 64552180 | 6       | ENSSSCT00000000699  | CLEC7A   | intron     | 0.021  | .               | 3 |
| AG.CT        | 5 | 64552169 | 64552180 | 6       | ENSSSCT000000033700 | CLEC7A   | intron     | 0.021  | .               | 3 |
| AG.CT        | 5 | 64552169 | 64552180 | 6       | ENSSSCT00000000700  | CLEC7A   | intron     | 0.021  | .               | 3 |
| AG.CT        | 5 | 64552169 | 64552180 | 6       | ENSSSCT000000033773 | CLEC7A   | intron     | 0.021  | .               | 3 |
| AG.CT        | 5 | 64552169 | 64552180 | 6       | ENSSSCT00000000701  | CLEC7A   | intron     | 0.021  | .               | 3 |
| AT.AT        | 5 | 64733633 | 64733643 | 5.5     | .                   | .        | intergenic | .      | rs793167888     | 3 |
| AAAC.GTTT    | 5 | 64759846 | 64759872 | 6.75    | ENSSSCT00000000707  | CLEC12A  | intron     | .      | 175026 rs7936   | 2 |
| AAAC.GTTT    | 5 | 64759846 | 64759872 | 6.75    | ENSSSCT000000035148 | CLEC12A  | intron     | .      | 175026 rs7936   | 2 |
| AAG.CTT      | 5 | 64881915 | 64881928 | 4.66667 | .                   | .        | intergenic | 0.147  | rs692962230     | 2 |
| AAAC.GTTT    | 5 | 64892367 | 64892387 | 5.25    | .                   | .        | intergenic | -0.097 | rs7937 rs7937   | 2 |
| AAC.GTT      | 5 | 64911233 | 64911250 | 6       | ENSSSCT00000000709  | CD69     | intron     | -0.071 | rs788857275     | 2 |
| AAC.GTT      | 5 | 64911233 | 64911250 | 6       | ENSSSCT00000000708  | CD69     | intron     | -0.071 | rs788857275     | 2 |
| AAG.CTT      | 5 | 65000411 | 65000434 | 8       | .                   | .        | intergenic | .      | rs789668336     | 2 |
| AAAC.GTTT    | 5 | 65007805 | 65007824 | 5       | .                   | .        | intergenic | .      | rs789768111     | 2 |
| AT.AT        | 5 | 65405361 | 65405374 | 7       | .                   | .        | intergenic | .      | .               | 2 |
| AG.CT        | 5 | 65472831 | 65472846 | 8       | ENSSSCT00000000720  | A2ML1    | intron     | .      | rs19244 rs7873  | 2 |
| AAAC.GTTT    | 5 | 65602241 | 65602263 | 5.75    | .                   | .        | intergenic | 0.23   | rs709732225     | 2 |
| AT.AT        | 5 | 65637818 | 65637832 | 7.5     | .                   | .        | intergenic | 0.13   | rs791398221     | 2 |
| AAT.ATT      | 5 | 65940241 | 65940253 | 4.33333 | ENSSSCT00000027671  | PEX5     | intron     | 0.16   | rs694101583     | 4 |
| AC.GT        | 5 | 65963672 | 65963703 | 16      | .                   | .        | intergenic | .      | rs73754 rs7913  | 2 |
| AG.CT        | 5 | 66310961 | 66310975 | 7.5     | ENSSSCT00000000742  | LEPREL2  | intron     | .      | .               | 3 |
| AAT.ATT      | 5 | 66517352 | 66517369 | 6       | ENSSSCT00000000754  | PIANP    | intron     | 0.137  | rs788577014     | 2 |
| AAAC.GTTT    | 5 | 66631900 | 66631913 | 3.5     | .                   | .        | intergenic | .      | rs787391482     | 2 |
| AC.GT        | 5 | 66675234 | 66675244 | 5.5     | .                   | .        | intergenic | .      | rs788931158     | 2 |
| AC.GT        | 5 | 67344826 | 67344838 | 6.5     | .                   | .        | intergenic | -0.055 | .               | 2 |
| AGC.GCT      | 5 | 67348437 | 67348453 | 5.66667 | .                   | .        | intergenic | -0.208 | rs789942600     | 2 |
| AAAC.GTTT    | 5 | 67381639 | 67381661 | 5.75    | .                   | .        | intergenic | -0.115 | rs793366423     | 2 |
| AC.GT        | 5 | 68098717 | 68098728 | 6       | ENSSSCT00000000785  | RAD51AP1 | intron     | 0.626  | rs787797665     | 2 |
| AC.GT        | 5 | 68133864 | 68133874 | 5.5     | ENSSSCT00000000786  | C12orf4  | intron     | -0.037 | .               | 2 |
| AC.GT        | 5 | 68241600 | 68241624 | 12.5    | .                   | .        | intergenic | 0.429  | rs792077401     | 2 |
| AC.GT        | 5 | 69775864 | 69775888 | 12.5    | ENSSSCT00000000812  | IQSEC3   | intron     | 0.006  | rs791057588     | 4 |
| AAAAT.ATTTT  | 5 | 70017275 | 70017295 | 4.2     | ENSSSCT00000023353  | KDM5A    | intron     | -0.135 | rs791439868     | 2 |
| AAAAG.CTTT   | 5 | 70343594 | 70343617 | 4.8     | ENSSSCT00000000817  | WNK1     | intron     | 0.199  | rs788953824     | 3 |
| AT.AT        | 5 | 70563564 | 70563576 | 6.5     | ENSSSCT00000000819  | RAB6IP2  | intron     | .      | rs787191862     | 2 |
| AG.CT        | 5 | 70578218 | 70578248 | 15.5    | ENSSSCT00000000819  | RAB6IP2  | intron     | 0.031  | rs789975592     | 2 |
| ATC.GAT      | 5 | 70614382 | 70614399 | 6       | ENSSSCT00000000819  | RAB6IP2  | intron     | 0.163  | rs790187760     | 2 |
| ACAT.ATGT    | 5 | 70623677 | 70623692 | 4       | ENSSSCT00000000819  | RAB6IP2  | intron     | .      | .               | 2 |
| AC.GT        | 5 | 70758620 | 70758631 | 6       | .                   | .        | intergenic | .      | .               | 3 |
| AAC.GTT      | 5 | 71309083 | 71309100 | 6       | .                   | .        | intergenic | 0.183  | rs788454386     | 3 |
| AAAAC.GTTTT  | 5 | 71361463 | 71361496 | 6.8     | .                   | .        | intergenic | 0.23   | rs790004991     | 2 |
| AAAAC.GTTTT  | 5 | 72070900 | 72070918 | 3.8     | ENSSSCT00000031909  | BCL2L13  | intron     | .      | rs793830810     | 2 |
| AT.AT        | 5 | 72089246 | 72089263 | 9       | ENSSSCT00000031909  | BCL2L13  | intron     | 0.212  | rs788640242     | 2 |
| AT.AT        | 5 | 72177332 | 72177344 | 6.5     | ENSSSCT00000000834  | .        | intron     | .      | rs79999 rs7916  | 2 |
| AGG.CCT      | 5 | 72650256 | 72650270 | 5       | .                   | .        | intergenic | .      | rs789553249     | 3 |
| AAT.ATT      | 5 | 72658577 | 72658595 | 6.33333 | .                   | .        | intergenic | -0.012 | rs788780661     | 2 |
| ACAT.ATGT    | 5 | 72777413 | 72777426 | 3.5     | .                   | .        | intergenic | 0.003  | rs793640423     | 2 |
| AAAT.ATTT    | 5 | 72779618 | 72779633 | 4       | .                   | .        | intergenic | 0.257  | rs787994679     | 2 |
| AAT.ATT      | 5 | 72804363 | 72804376 | 4.66667 | ENSSSCT00000028240  | CPNE8    | intron     | 0.126  | rs788736129     | 2 |
| AAT.ATT      | 5 | 72804363 | 72804376 | 4.66667 | ENSSSCT00000000842  | CPNE8    | intron     | 0.126  | rs788736129     | 2 |
| AAT.ATT      | 5 | 72804363 | 72804376 | 4.66667 | ENSSSCT00000027279  | CPNE8    | intron     | 0.126  | rs788736129     | 2 |
| AAAG.CTTT    | 5 | 73048700 | 73048715 | 4       | ENSSSCT00000028240  | CPNE8    | intron     | 0.153  | rs789089185     | 2 |
| AT.AT        | 5 | 73095654 | 73095665 | 6       | ENSSSCT00000028240  | CPNE8    | intron     | -0.019 | .               | 2 |
| AT.AT        | 5 | 73152609 | 73152619 | 5.5     | .                   | .        | intergenic | 0.218  | rs72384 rs7870  | 2 |
| AGG.CCT      | 5 | 73412917 | 73412933 | 5.66667 | ENSSSCT00000000843  | KIF21A   | intron     | 0.018  | .               | 2 |
| AAAG.CTTT    | 5 | 73732161 | 73732187 | 6.75    | ENSSSCT00000000845  | ABCD2    | intron     | 0.133  | rs786834847     | 2 |
| AT.AT        | 5 | 73813618 | 73813632 | 7.5     | ENSSSCT00000000846  | C12orf40 | intron     | .      | rs790220822     | 2 |
| AAAT.ATTT    | 5 | 73820653 | 73820670 | 4.5     | ENSSSCT00000000846  | C12orf40 | intron     | .      | rs788968218     | 2 |
| AG.CT        | 5 | 73951966 | 73951975 | 5       | ENSSSCT00000034370  | SLC2A13  | intron     | 0.118  | .               | 3 |
| AT.AT        | 5 | 73963953 | 73963964 | 6       | ENSSSCT00000034370  | SLC2A13  | intron     | 0.023  | rs792926914     | 2 |
| ACAT.ATGT    | 5 | 73964054 | 73964072 | 4.75    | ENSSSCT00000034370  | SLC2A13  | intron     | -0.039 | .               | 2 |
| AT.AT        | 5 | 73980232 | 73980249 | 9       | ENSSSCT00000034370  | SLC2A13  | intron     | 0.037  | .               | 5 |
| AT.AT        | 5 | 73995600 | 73995614 | 7.5     | ENSSSCT00000034370  | SLC2A13  | intron     | 0.172  | rs787077874     | 2 |
| AAT.ATT      | 5 | 73997634 | 73997655 | 7.33333 | ENSSSCT00000034370  | SLC2A13  | intron     | 0.175  | rs787993260     | 2 |
| AAG.CTT      | 5 | 74134714 | 74134731 | 6       | .                   | .        | intergenic | 0.318  | rs789571068     | 2 |
| AAAC.GTTT    | 5 | 74639476 | 74639498 | 5.75    | ENSSSCT00000000849  | LRRK2    | intron     | 2.987  | rs788464692     | 2 |
| AG.CT        | 5 | 75026870 | 75026880 | 5.5     | .                   | .        | intergenic | -0.242 | .               | 2 |
| AC.GT        | 5 | 75173842 | 75173853 | 6       | ENSSSCT00000000855  | CNTN1    | intron     | 0.022  | rs786239328     | 2 |
| AT.AT        | 5 | 75378144 | 75378154 | 5.5     | ENSSSCT00000034945  | CNTN1    | intron     | 0.259  | rs789436177     | 2 |
| AT.AT        | 5 | 75378144 | 75378154 | 5.5     | ENSSSCT00000036262  | CNTN1    | intron     | 0.259  | rs789436177     | 2 |
| AT.AT        | 5 | 75460909 | 75460919 | 5.5     | .                   | .        | intergenic | .      | rs787656390     | 3 |
| AC.GT        | 5 | 75548494 | 75548528 | 17.5    | .                   | .        | intergenic | 0.456  | rs38008 rs7913  | 4 |
| GAGGG.CCCTC  | 5 | 75601711 | 75601742 | 5.33333 | .                   | .        | intergenic | 0.154  | .               | 2 |
| AAAC.GTTT    | 5 | 75603867 | 75603901 | 8.75    | .                   | .        | intergenic | 0.072  | rs790961447     | 2 |
| AC.GT        | 5 | 75617201 | 75617214 | 7       | .                   | .        | intergenic | 0.047  | .               | 4 |
| AC.GT        | 5 | 75624825 | 75624839 | 7.5     | .                   | .        | intergenic | 0.026  | rs790767195     | 2 |
| AC.GT        | 5 | 75629390 | 75629409 | 10      | .                   | .        | intergenic | 0.09   | rs261619 rs7923 | 4 |
| AAAAAT.ATTTT | 5 | 75648629 | 75648651 | 3.83333 | .                   | .        | intergenic | -0.293 | rs790946606     | 2 |
| AAAAG.CTTT   | 5 | 75716649 | 75716675 | 5.4     | .                   | .        | intergenic | -0.09  | rs788869162     | 2 |
| AG.CT        | 5 | 75764940 | 75764949 | 5       | .                   | .        | intergenic | -0.181 | rs792626424     | 2 |
| AAGG.CCTT    | 5 | 75793010 | 75793035 | 6.5     | .                   | .        | intergenic | -0.068 | .               | 3 |
| AAAC.GTTT    | 5 | 75944353 | 75944368 | 4       | .                   | .        | intergenic | -0.075 | rs793046275     | 2 |
| AAAAAG.CTTT  | 5 | 75985605 | 75985629 | 4.16667 | .                   | .        | intergenic | 0.006  | rs787787452     | 2 |



|             |   |          |          |         |                     |          |            |        |             |   |
|-------------|---|----------|----------|---------|---------------------|----------|------------|--------|-------------|---|
| AC.GT       | 5 | 76212044 | 76212054 | 5.5     | .                   | .        | intergenic | .      | rs786917626 | 2 |
| AC.GT       | 5 | 76325340 | 76325349 | 5       | ENSSSCT00000000859  | PPHLN1   | intron     | 0.131  | .           | 2 |
| AAAT.ATTT   | 5 | 76651777 | 76651788 | 3       | .                   | .        | intergenic | .      | rs793759285 | 2 |
| AC.GT       | 5 | 76658063 | 76658077 | 7.5     | .                   | .        | intergenic | .      | rs791570050 | 4 |
| AAAC.GTTT   | 5 | 76771663 | 76771686 | 6       | .                   | .        | intergenic | -0.22  | rs790424050 | 2 |
| AC.GT       | 5 | 76794813 | 76794823 | 5.5     | .                   | .        | intergenic | 0.108  | rs789005193 | 2 |
| AT.AT       | 5 | 77057866 | 77057877 | 6       | .                   | .        | intergenic | .      | .           | 3 |
| AT.AT       | 5 | 77214784 | 77214794 | 5.5     | .                   | .        | intergenic | .      | rs786366496 | 2 |
| AT.AT       | 5 | 77446778 | 77446789 | 6       | ENSSSCT00000000862  | ADAMTS2C | intron     | 0.126  | rs793771542 | 2 |
| AAG.CTT     | 5 | 77451208 | 77451219 | 4       | ENSSSCT00000000862  | ADAMTS2C | intron     | -0.091 | rs786787004 | 2 |
| AC.GT       | 5 | 77480222 | 77480232 | 5.5     | ENSSSCT00000000862  | ADAMTS2C | intron     | -0.097 | rs786759565 | 3 |
| AT.AT       | 5 | 77489406 | 77489417 | 6       | .                   | .        | intergenic | 0.065  | .           | 2 |
| AAAAT.ATTTT | 5 | 77510071 | 77510096 | 5.2     | .                   | .        | intergenic | 0.03   | rs7918      | 2 |
| AG.CT       | 5 | 77517113 | 77517138 | 13      | .                   | .        | intergenic | 0.085  | rs792516835 | 2 |
| AC.GT       | 5 | 77526666 | 77526678 | 6.5     | .                   | .        | intergenic | 0.759  | rs788107800 | 2 |
| AAG.CTT     | 5 | 77645597 | 77645608 | 4       | ENSSSCT00000000867  | PUS7L    | intron     | 0.106  | rs7892      | 3 |
| AAG.CTT     | 5 | 77645597 | 77645608 | 4       | ENSSSCT00000000866  | IRAK4    | promoter   | 0.106  | rs7892      | 3 |
| AAG.CTT     | 5 | 77645597 | 77645608 | 4       | ENSSSCT000000035861 | IRAK4    | promoter   | 0.106  | rs7892      | 3 |
| AAAT.ATTT   | 5 | 77794536 | 77794554 | 4.75    | .                   | .        | intergenic | 0.073  | .           | 2 |
| CACAT.ATGTG | 5 | 77966222 | 77966246 | 4.16667 | .                   | .        | intergenic | 0.226  | rs792513865 | 2 |
| AAC.GTT     | 5 | 78029012 | 78029028 | 5.66667 | .                   | .        | intergenic | .      | rs791367968 | 2 |
| AT.AT       | 5 | 78086027 | 78086036 | 5       | .                   | .        | intergenic | -0.085 | .           | 3 |
| AC.GT       | 5 | 78120065 | 78120084 | 10      | .                   | .        | intergenic | 0.032  | rs793079175 | 2 |
| AT.AT       | 5 | 78125336 | 78125346 | 5.5     | .                   | .        | intergenic | 0.027  | rs789274540 | 3 |
| AAAT.ATTT   | 5 | 78134529 | 78134547 | 4.75    | .                   | .        | intergenic | 0.117  | rs788974308 | 2 |
| AAC.GTT     | 5 | 78540246 | 78540262 | 5.66667 | ENSSSCT00000000870  | NELL2    | intron     | 0.104  | rs789330256 | 4 |
| AC.GT       | 5 | 78565118 | 78565131 | 7       | ENSSSCT00000000870  | NELL2    | intron     | -0.068 | rs789028190 | 2 |
| GATAT.ATATC | 5 | 78580040 | 78580077 | 6.33333 | ENSSSCT00000000870  | NELL2    | intron     | 0.004  | rs790746379 | 3 |
| AAAAT.ATTTT | 5 | 78591323 | 78591341 | 3.8     | ENSSSCT00000000870  | NELL2    | intron     | 0.107  | rs790749678 | 2 |
| AAC.GTT     | 5 | 78672140 | 78672159 | 6.66667 | ENSSSCT00000000870  | NELL2    | intron     | 0.06   | rs786710211 | 2 |
| AAATC.GATTT | 5 | 78963036 | 78963064 | 5.8     | .                   | .        | intergenic | .      | rs790556993 | 2 |
| AAAG.CTTT   | 5 | 79070827 | 79070843 | 4.25    | .                   | .        | intergenic | .      | rs78931     | 2 |
| AAAT.ATTT   | 5 | 79137934 | 79137952 | 4.75    | ENSSSCT00000000873  | ANO6     | intron     | .      | rs788960988 | 2 |
| AATAT.ATATT | 5 | 79250357 | 79250385 | 5.8     | .                   | .        | intergenic | 0.196  | rs7904      | 2 |
| AAAAT.GTTTT | 5 | 79362709 | 79362728 | 4       | .                   | .        | intergenic | 0.012  | rs7879      | 3 |
| AAC.CTT     | 5 | 79406359 | 79406384 | 8.66667 | .                   | .        | intergenic | .      | rs78925     | 2 |
| AT.AT       | 5 | 79492188 | 79492198 | 5.5     | .                   | .        | intergenic | .      | .           | 3 |
| AT.AT       | 5 | 79739655 | 79739667 | 6.5     | ENSSSCT00000023077  | SCAF11   | intron     | 1.81   | rs7882      | 2 |
| AT.AT       | 5 | 79739655 | 79739667 | 6.5     | ENSSSCT00000031177  | SCAF11   | intron     | 1.81   | rs7882      | 2 |
| AT.AT       | 5 | 79739655 | 79739667 | 6.5     | ENSSSCT00000000875  | SCAF11   | intron     | 1.81   | rs7882      | 2 |
| AT.AT       | 5 | 79908706 | 79908716 | 5.5     | .                   | .        | intergenic | 0.016  | .           | 4 |
| AAAT.ATTT   | 5 | 79983942 | 79983962 | 5.25    | ENSSSCT00000000876  | SLC38A1  | intron     | 0.393  | rs7936      | 2 |
| AAAC.GTTT   | 5 | 80008702 | 80008715 | 3.5     | .                   | .        | intergenic | .      | rs790227746 | 2 |
| AAAT.ATTT   | 5 | 80016827 | 80016847 | 5.25    | .                   | .        | intergenic | -0.078 | rs7911      | 2 |
| AC.GT       | 5 | 80101801 | 80101819 | 9.5     | .                   | .        | intergenic | 0.049  | rs792963302 | 5 |
| AAAAG.CTTTT | 5 | 80307234 | 80307260 | 5.4     | .                   | .        | intergenic | .      | rs7901      | 2 |
| AC.GT       | 5 | 80410764 | 80410775 | 6       | ENSSSCT00000029189  | SLC38A4  | intron     | 0.105  | rs787655268 | 2 |
| AATG.CATT   | 5 | 80642879 | 80642906 | 7       | .                   | .        | intergenic | -0.091 | rs791469144 | 2 |
| AAACC.GGTTT | 5 | 81082452 | 81082468 | 3.4     | .                   | .        | intergenic | 0.007  | rs790882818 | 2 |
| AG.CT       | 5 | 81101898 | 81101908 | 5.5     | .                   | .        | intergenic | 0.366  | .           | 2 |
| AAT.ATT     | 5 | 81316067 | 81316083 | 5.66667 | ENSSSCT00000032274  | VDR      | intron     | 0.034  | rs792773981 | 2 |
| AAAC.GTTT   | 5 | 81823019 | 81823033 | 3.75    | .                   | .        | intergenic | .      | rs792173823 | 2 |
| AAAAT.ATTTT | 5 | 81824174 | 81824195 | 4.4     | .                   | .        | intergenic | .      | rs793807236 | 4 |
| ACC.GGT     | 5 | 81897633 | 81897648 | 5.33333 | .                   | .        | intergenic | -0.286 | rs792038136 | 2 |
| AC.GT       | 5 | 82175623 | 82175633 | 5.5     | .                   | .        | intergenic | 0.181  | rs7896      | 2 |
| AT.AT       | 5 | 82459452 | 82459462 | 5.5     | ENSSSCT00000025699  | .        | intron     | .      | .           | 2 |
| AC.GT       | 5 | 82662042 | 82662057 | 8       | ENSSSCT00000000915  | APPL2    | intron     | .      | rs791181165 | 3 |
| AAAT.ATTT   | 5 | 82668577 | 82668591 | 3.75    | ENSSSCT00000000915  | APPL2    | intron     | -0.381 | rs7879      | 2 |
| AAT.ATT     | 5 | 83030451 | 83030476 | 8.66667 | ENSSSCT00000000911  | SLC41A2  | intron     | 0.063  | rs791433966 | 2 |
| AC.GT       | 5 | 83110990 | 83111000 | 5.5     | ENSSSCT00000000911  | SLC41A2  | intron     | 0.022  | rs792503657 | 2 |
| ATATC.GATAT | 5 | 83233315 | 83233329 | 3       | ENSSSCT00000000910  | CHST11   | intron     | -0.069 | rs786209092 | 2 |
| AAGG.CCTT   | 5 | 83462394 | 83462412 | 4.75    | ENSSSCT00000000910  | CHST11   | intron     | -0.069 | rs787588213 | 2 |
| AAC.GTT     | 5 | 83839954 | 83839967 | 4.66667 | .                   | .        | intergenic | 0.278  | rs790520    | 2 |
| AAAG.CTTT   | 5 | 83893623 | 83893637 | 3.75    | .                   | .        | intergenic | .      | rs786711417 | 2 |
| AAAC.GTTT   | 5 | 83984098 | 83984118 | 5.25    | .                   | .        | intergenic | 0.221  | rs792320154 | 2 |
| AC.GT       | 5 | 84038931 | 84038950 | 10      | ENSSSCT00000000926  | HSP90B1  | intron     | -0.256 | rs789746840 | 4 |
| AC.GT       | 5 | 84038931 | 84038950 | 10      | ENSSSCT00000000925  | GLT8D2   | intron     | -0.256 | rs789746840 | 4 |
| AAAG.CTTT   | 5 | 84073364 | 84073382 | 4.75    | ENSSSCT00000000926  | HSP90B1  | intron     | .      | rs788422493 | 2 |
| AC.GT       | 5 | 84154401 | 84154411 | 5.5     | ENSSSCT00000000930  | .        | intron     | -0.021 | .           | 2 |
| AAAC.GTTT   | 5 | 84171786 | 84171804 | 4.75    | ENSSSCT00000000930  | .        | intron     | 0.333  | rs7910      | 2 |
| AAAAC.GTTTT | 5 | 84494053 | 84494077 | 5       | .                   | .        | intergenic | .      | rs7871      | 2 |
| AG.CT       | 5 | 84537279 | 84537295 | 8.5     | .                   | .        | intergenic | -0.2   | .           | 2 |
| AG.CT       | 5 | 84597858 | 84597872 | 7.5     | .                   | .        | intergenic | 0.245  | .           | 2 |
| AAAAC.GTTTT | 5 | 84959338 | 84959359 | 4.4     | .                   | .        | intergenic | 0.103  | .           | 2 |
| AT.AT       | 5 | 85062200 | 85062210 | 5.5     | ENSSSCT00000022294  | .        | promoter   | 0.002  | rs793488247 | 3 |
| AC.GT       | 5 | 85610631 | 85610644 | 7       | .                   | .        | intergenic | 1.757  | rs789162522 | 2 |
| AC.GT       | 5 | 85764617 | 85764627 | 5.5     | ENSSSCT00000034902  | IGFI     | intron     | 0.179  | .           | 5 |
| AC.GT       | 5 | 85764617 | 85764627 | 5.5     | ENSSSCT00000034323  | IGFI     | intron     | 0.179  | .           | 5 |
| AC.GT       | 5 | 85764617 | 85764627 | 5.5     | ENSSSCT00000034198  | IGFI     | intron     | 0.179  | .           | 5 |
| AC.GT       | 5 | 85764617 | 85764627 | 5.5     | ENSSSCT00000035604  | IGFI     | intron     | 0.179  | .           | 5 |
| AC.GT       | 5 | 85764617 | 85764627 | 5.5     | ENSSSCT00000000936  | IGFI     | intron     | 0.179  | .           | 5 |
| AC.GT       | 5 | 85764617 | 85764627 | 5.5     | ENSSSCT00000035532  | IGFI     | intron     | 0.179  | .           | 5 |
| AC.GT       | 5 | 85764617 | 85764627 | 5.5     | ENSSSCT00000035024  | IGFI     | intron     | 0.179  | .           | 5 |
| AC.GT       | 5 | 85764617 | 85764627 | 5.5     | ENSSSCT00000034991  | IGFI     | intron     | 0.179  | .           | 5 |

|              |   |          |          |         |                    |          |            |        |               |   |
|--------------|---|----------|----------|---------|--------------------|----------|------------|--------|---------------|---|
| AT.AT        | 5 | 85810054 | 85810070 | 8.5     | .                  | .        | intergenic | 0.076  | 219375 rs7924 | 2 |
| AC.GT        | 5 | 86069438 | 86069461 | 12      | ENSSSCT00000000939 | .        | intron     | 0.082  | .             | 2 |
| AAAC.GTTT    | 5 | 86369160 | 86369177 | 4.5     | ENSSSCT00000028915 | .        | intron     | .      | rs790634353   | 2 |
| AAC.GTT      | 5 | 86401970 | 86401983 | 4.66667 | ENSSSCT00000028915 | .        | intron     | 1.907  | rs787480497   | 2 |
| AAC.GTT      | 5 | 86401970 | 86401983 | 4.66667 | ENSSSCT00000000941 | .        | intron     | 1.907  | rs787480497   | 2 |
| AAC.GTT      | 5 | 86401970 | 86401983 | 4.66667 | ENSSSCT00000029378 | U2       | promoter   | 1.907  | rs787480497   | 2 |
| AG.CT        | 5 | 86424190 | 86424201 | 6       | .                  | .        | intergenic | .      | 226369 rs7874 | 4 |
| AAAC.GTTT    | 5 | 86472143 | 86472157 | 3.75    | ENSSSCT00000000943 | CHPT1    | intron     | .      | 394772 rs7900 | 2 |
| AAC.GTT      | 5 | 86472247 | 86472258 | 4       | ENSSSCT00000000943 | CHPT1    | intron     | .      | rs707653662   | 2 |
| AAAAC.GTTTT  | 5 | 86527346 | 86527367 | 4.4     | ENSSSCT00000000945 | MYBPC1   | intron     | .      | rs789583802   | 3 |
| AAAAC.GTTTT  | 5 | 86527346 | 86527367 | 4.4     | ENSSSCT00000030865 | .        | intron     | .      | rs789583802   | 3 |
| AAAG.CTTT    | 5 | 86570806 | 86570823 | 4.5     | ENSSSCT00000000945 | MYBPC1   | intron     | 1.926  | rs790668456   | 2 |
| AAC.GTT      | 5 | 86602807 | 86602818 | 4       | ENSSSCT00000000945 | MYBPC1   | intron     | 0.149  | rs790101476   | 3 |
| AC.GT        | 5 | 86688523 | 86688539 | 8.5     | .                  | .        | intergenic | .      | .             | 4 |
| AAC.GTT      | 5 | 86700801 | 86700813 | 4.33333 | .                  | .        | intergenic | .      | rs787814525   | 3 |
| AAAC.GTTT    | 5 | 86763936 | 86763948 | 3.25    | .                  | .        | intergenic | 0.375  | rs786247492   | 2 |
| AATC.GATT    | 5 | 86772625 | 86772644 | 5       | .                  | .        | intergenic | 0.162  | 368426 rs7907 | 2 |
| AAAT.ATTT    | 5 | 86775082 | 86775110 | 7.25    | .                  | .        | intergenic | .      | 717248 rs7872 | 2 |
| AAAAC.GTTT   | 5 | 86784294 | 86784312 | 4.75    | .                  | .        | intergenic | 0.233  | 382631 rs7887 | 2 |
| AAAC.GTTT    | 5 | 86824214 | 86824232 | 4.75    | ENSSSCT00000000949 | UTP20    | intron     | -0.264 | rs789181836   | 3 |
| AAC.GTT      | 5 | 86862428 | 86862443 | 5.33333 | ENSSSCT00000000949 | UTP20    | intron     | -0.064 | rs788414750   | 2 |
| AT.AT        | 5 | 86937216 | 86937226 | 5.5     | .                  | .        | intergenic | .      | .             | 2 |
| AC.GT        | 5 | 87212135 | 87212152 | 9       | ENSSSCT00000000956 | ANO4     | intron     | 0.027  | rs790804608   | 2 |
| AC.GT        | 5 | 87382682 | 87382703 | 11      | .                  | .        | intergenic | 0.126  | rs793787852   | 2 |
| AAAC.GTTT    | 5 | 87434006 | 87434017 | 3       | .                  | .        | intergenic | 0.451  | rs787489961   | 2 |
| AAT.ATT      | 5 | 87495988 | 87496001 | 4.66667 | .                  | .        | intergenic | 0.081  | rs789824405   | 2 |
| AAG.CTT      | 5 | 87728622 | 87728638 | 5.66667 | .                  | .        | intergenic | -0.074 | rs701341248   | 2 |
| AT.AT        | 5 | 87741299 | 87741318 | 10      | .                  | .        | intergenic | 0.04   | 790947 rs7912 | 2 |
| AGATAT.ATATC | 5 | 87743022 | 87743041 | 3.33333 | .                  | .        | intergenic | 0.161  | rs793614187   | 3 |
| ACAT.ATGT    | 5 | 87746940 | 87746966 | 6.75    | .                  | .        | intergenic | .      | 347165 rs7931 | 2 |
| AAAAT.ATTTT  | 5 | 87955042 | 87955060 | 3.8     | .                  | .        | intergenic | 0.208  | rs787671008   | 2 |
| AT.AT        | 5 | 88009909 | 88009932 | 12      | ENSSSCT00000028017 | JHRF1BP1 | intron     | 0.192  | 221515 rs7891 | 2 |
| AT.AT        | 5 | 88009909 | 88009932 | 12      | ENSSSCT00000000960 | .        | intron     | 0.192  | 221515 rs7891 | 2 |
| AT.AT        | 5 | 88009909 | 88009932 | 12      | ENSSSCT00000000963 | .        | intron     | 0.192  | 221515 rs7891 | 2 |
| AAAT.ATTT    | 5 | 88495827 | 88495843 | 4.25    | .                  | .        | intergenic | 0.363  | .             | 2 |
| AATG.CATT    | 5 | 88529401 | 88529419 | 4.75    | ENSSSCT00000000964 | .        | intron     | 0.084  | rs789115589   | 2 |
| AAAAC.GTTTT  | 5 | 88653480 | 88653498 | 3.8     | ENSSSCT00000000964 | .        | intron     | -0.036 | rs791420906   | 2 |
| AAAAC.GTTTT  | 5 | 88924301 | 88924324 | 4.8     | ENSSSCT00000000966 | .        | intron     | 0.137  | 295441 rs7938 | 3 |
| AC.GT        | 5 | 89014202 | 89014212 | 5.5     | ENSSSCT00000000966 | .        | intron     | 0.119  | 325853 rs7894 | 2 |
| AAAG.CTTT    | 5 | 89122176 | 89122197 | 5.5     | .                  | .        | intergenic | 0.23   | rs790593233   | 2 |
| AG.CT        | 5 | 89143955 | 89143970 | 8       | .                  | .        | intergenic | 0.108  | .             | 2 |
| AAAC.GTTT    | 5 | 89148058 | 89148080 | 5.75    | .                  | .        | intergenic | .      | 720081 rs7898 | 2 |
| AC.GT        | 5 | 89223538 | 89223548 | 5.5     | .                  | .        | intergenic | 0.055  | rs786450670   | 2 |
| AT.AT        | 5 | 89253502 | 89253513 | 6       | .                  | .        | intergenic | .      | rs793296685   | 2 |
| AG.CT        | 5 | 89639968 | 89639979 | 6       | .                  | .        | intergenic | 0.034  | rs791776374   | 2 |
| AAAC.GTTT    | 5 | 89643998 | 89644009 | 3       | ENSSSCT00000000971 | .        | intron     | 1.216  | rs786821587   | 2 |
| AC.GT        | 5 | 89666104 | 89666115 | 6       | ENSSSCT00000000971 | .        | intron     | 0.253  | rs790384701   | 2 |
| AC.GT        | 5 | 89882086 | 89882105 | 10      | .                  | .        | intergenic | .      | rs790553117   | 2 |
| AAT.ATT      | 5 | 90235614 | 90235637 | 8       | .                  | .        | intergenic | 0.402  | 300606 rs7921 | 2 |
| AG.CT        | 5 | 90239972 | 90239982 | 5.5     | .                  | .        | intergenic | -0.014 | .             | 2 |
| AAAG.CTTT    | 5 | 90276941 | 90276967 | 6.75    | .                  | .        | intergenic | 0.618  | .             | 2 |
| AT.AT        | 5 | 90366564 | 90366573 | 5       | .                  | .        | intergenic | 0.521  | rs793425664   | 2 |
| AC.GT        | 5 | 90497295 | 90497305 | 5.5     | .                  | .        | intergenic | -0.089 | rs788127717   | 2 |
| AAC.GTT      | 5 | 90503700 | 90503713 | 4.66667 | .                  | .        | intergenic | 0.517  | rs793695733   | 2 |
| AAAT.ATTT    | 5 | 90524433 | 90524467 | 8.75    | .                  | .        | intergenic | 0.191  | rs792718994   | 2 |
| AG.CT        | 5 | 90578666 | 90578675 | 5       | .                  | .        | intergenic | -0.044 | rs792615175   | 2 |
| AAAT.ATTT    | 5 | 90617058 | 90617076 | 4.75    | .                  | .        | intergenic | 0.081  | rs786429608   | 2 |
| AC.GT        | 5 | 90699270 | 90699284 | 7.5     | .                  | .        | intergenic | -0.116 | rs792364960   | 3 |
| AAAC.GTTT    | 5 | 91044547 | 91044562 | 4       | .                  | .        | intergenic | 0.106  | .             | 2 |
| AAAG.CTTT    | 5 | 91073892 | 91073909 | 4.5     | .                  | .        | intergenic | .      | .             | 2 |
| AAT.ATT      | 5 | 91130172 | 91130185 | 4.66667 | .                  | .        | intergenic | 0.005  | rs787361439   | 3 |
| AAAT.ATTT    | 5 | 91140280 | 91140313 | 8.5     | .                  | .        | intergenic | 0.087  | .             | 2 |
| AATG.CATT    | 5 | 91178665 | 91178691 | 6.75    | .                  | .        | intergenic | 0.042  | rs792812403   | 2 |
| AC.GT        | 5 | 91206553 | 91206569 | 8.5     | .                  | .        | intergenic | .      | rs787914436   | 2 |
| AT.AT        | 5 | 91289788 | 91289809 | 11      | ENSSSCT00000000974 | NEDD1    | promoter   | 0.217  | .             | 2 |
| AT.AT        | 5 | 91409669 | 91409679 | 5.5     | .                  | .        | intergenic | .      | rs790224224   | 2 |
| ACAT.ATGT    | 5 | 91544997 | 91545018 | 5.5     | .                  | .        | intergenic | .      | rs791163655   | 2 |
| AAAAC.GTTTT  | 5 | 91629314 | 91629336 | 4.6     | .                  | .        | intergenic | .      | rs787188181   | 2 |
| AAAT.ATTT    | 5 | 91833558 | 91833571 | 3.5     | .                  | .        | intergenic | .      | rs786265279   | 2 |
| AAAC.GTTT    | 5 | 91896256 | 91896288 | 8.25    | ENSSSCT00000000980 | NTN4     | intron     | 0.834  | 754334 rs7868 | 2 |
| AAAAG.CTTTT  | 5 | 91923719 | 91923739 | 4.2     | ENSSSCT00000000980 | NTN4     | intron     | .      | rs786469481   | 4 |
| AAGC.GCTT    | 5 | 91987110 | 91987137 | 7       | .                  | .        | intergenic | 0.316  | rs790002367   | 2 |
| AAC.GTT      | 5 | 92133455 | 92133468 | 4.66667 | .                  | .        | intergenic | .      | rs788937456   | 2 |
| AAAT.ATTT    | 5 | 92177803 | 92177830 | 7       | .                  | .        | intergenic | .      | 365972 rs7901 | 2 |
| AAAAC.GTTTT  | 5 | 92651889 | 92651918 | 6       | ENSSSCT00000000989 | NDUFA12  | intron     | 0.267  | 130839 rs7878 | 2 |
| AAAAC.GTTTT  | 5 | 92762822 | 92762842 | 4.2     | .                  | .        | intergenic | .      | rs791602523   | 2 |
| AT.AT        | 5 | 92775891 | 92775901 | 5.5     | .                  | .        | intergenic | 0.388  | rs791680818   | 2 |
| AATG.CATT    | 5 | 92993788 | 92993810 | 5.75    | .                  | .        | intergenic | -0.438 | rs791853385   | 2 |
| AAAAC.GTTTT  | 5 | 93470079 | 93470098 | 4       | ENSSSCT00000032383 | CCDC41   | intron     | .      | rs786348283   | 2 |
| AAAAC.GTTTT  | 5 | 93470079 | 93470098 | 4       | ENSSSCT00000024929 | CCDC41   | intron     | .      | rs786348283   | 2 |
| AC.GT        | 5 | 93471864 | 93471883 | 10      | ENSSSCT00000032383 | CCDC41   | intron     | .      | rs793749089   | 2 |
| AC.GT        | 5 | 93471864 | 93471883 | 10      | ENSSSCT00000024929 | CCDC41   | intron     | .      | rs793749089   | 2 |
| AT.AT        | 5 | 93496857 | 93496867 | 5.5     | ENSSSCT00000032383 | CCDC41   | intron     | .      | 116225 rs7907 | 2 |
| AT.AT        | 5 | 93496857 | 93496867 | 5.5     | ENSSSCT00000024929 | CCDC41   | intron     | .      | 116225 rs7907 | 2 |

|              |   |           |           |         |                    |          |            |        |                     |   |
|--------------|---|-----------|-----------|---------|--------------------|----------|------------|--------|---------------------|---|
| AC.GT        | 5 | 93501766  | 93501778  | 6.5     | ENSSSCT00000032383 | CCDC41   | intron     | .      | rs792519525         | 2 |
| AC.GT        | 5 | 93501766  | 93501778  | 6.5     | ENSSSCT00000024929 | CCDC41   | intron     | .      | rs792519525         | 2 |
| AAAC.GTTT    | 5 | 93516028  | 93516042  | 3.75    | ENSSSCT00000032383 | CCDC41   | intron     | 0.142  | rs792607054         | 2 |
| AAAC.GTTT    | 5 | 93516028  | 93516042  | 3.75    | ENSSSCT00000024929 | CCDC41   | intron     | 0.142  | rs792607054         | 2 |
| ATC.GAT      | 5 | 93664443  | 93664464  | 7.33333 | .                  | .        | intergenic | 0.289  | rs792883074         | 2 |
| AG.CT        | 5 | 93672477  | 93672487  | 5.5     | .                  | .        | intergenic | 0.067  | rs7925201 rs7930    | 2 |
| AAAT.ATTT    | 5 | 93724116  | 93724132  | 4.25    | .                  | .        | intergenic | 0.503  | rs792518625 rs7938  | 2 |
| AG.CT        | 5 | 93726409  | 93726418  | 5       | .                  | .        | intergenic | -0.047 | rs7925184670 rs7922 | 2 |
| AGATAT.ATATC | 5 | 93825480  | 93825505  | 4.33333 | .                  | .        | intergenic | .      | rs791592558         | 2 |
| ATC.GAT      | 5 | 94027660  | 94027672  | 4.33333 | .                  | .        | intergenic | 0.013  | rs787407989         | 2 |
| AAAAT.ATTTT  | 5 | 94331408  | 94331423  | 3.2     | .                  | .        | intergenic | .      | rs787132705         | 2 |
| AC.GT        | 5 | 94379160  | 94379174  | 7.5     | .                  | .        | intergenic | .      | .                   | 3 |
| AG.CT        | 5 | 94678481  | 94678492  | 6       | .                  | .        | intergenic | 0.139  | rs791125648         | 2 |
| AAG.CTT      | 5 | 94689673  | 94689689  | 5.66667 | .                  | .        | intergenic | 0.761  | rs792990085         | 2 |
| AAAAT.ATTTT  | 5 | 94948818  | 94948834  | 3.4     | .                  | .        | intergenic | 0.048  | rs799768 rs7897     | 2 |
| AGC.GCT      | 5 | 95015933  | 95015951  | 6.33333 | .                  | .        | intergenic | 0.177  | rs712914937         | 3 |
| AAAAG.CTTTT  | 5 | 95549472  | 95549495  | 4.8     | .                  | .        | intergenic | 0.328  | rs79148912 rs7898   | 2 |
| AT.AT        | 5 | 95561483  | 95561500  | 9       | .                  | .        | intergenic | 0.093  | rs791093334         | 2 |
| AAAC.GTTT    | 5 | 96153246  | 96153272  | 6.75    | .                  | .        | intergenic | .      | rs791189165         | 2 |
| AAAAT.ATTTT  | 5 | 96376547  | 96376562  | 3.2     | .                  | .        | intergenic | .      | rs787972499         | 2 |
| AAAC.GTTT    | 5 | 96478089  | 96478107  | 4.75    | .                  | .        | intergenic | .      | rs786768232         | 4 |
| AAAC.GTTT    | 5 | 96746480  | 96746494  | 3.75    | .                  | .        | intergenic | .      | rs786628520         | 2 |
| AC.GT        | 5 | 96758071  | 96758084  | 7       | .                  | .        | intergenic | 0.044  | .                   | 2 |
| AAT.ATT      | 5 | 96924500  | 96924529  | 10      | .                  | .        | intergenic | -0.093 | .                   | 2 |
| AT.AT        | 5 | 97232768  | 97232802  | 17.5    | .                  | .        | intergenic | 0.755  | rs793437995         | 2 |
| AG.CT        | 5 | 97291369  | 97291379  | 5.5     | .                  | .        | intergenic | .      | .                   | 3 |
| AGC.GCT      | 5 | 97486328  | 97486348  | 7       | .                  | .        | intergenic | 0.112  | rs789068530         | 2 |
| AG.CT        | 5 | 97849161  | 97849175  | 7.5     | ENSSSCT0000001004  | .        | intron     | .      | rs786742080         | 2 |
| AAT.ATT      | 5 | 97980247  | 97980258  | 4       | .                  | .        | intergenic | 0.068  | rs791913 rs7916     | 2 |
| AAAAC.GTTTT  | 5 | 98127633  | 98127654  | 3.66667 | .                  | .        | intergenic | 0.104  | rs789887170         | 2 |
| AAAAC.GTTTT  | 5 | 98136774  | 98136789  | 3.2     | .                  | .        | intergenic | 0.414  | .                   | 2 |
| ACAG.CTGT    | 5 | 98240590  | 98240612  | 5.75    | .                  | .        | intergenic | -0.089 | rs788528592         | 2 |
| AC.GT        | 5 | 98519794  | 98519808  | 7.5     | .                  | .        | intergenic | .      | rs788477120         | 4 |
| AG.CT        | 5 | 98579561  | 98579583  | 11.5    | .                  | .        | intergenic | 0.036  | rs788329719         | 2 |
| AG.CT        | 5 | 98740771  | 98740781  | 5.5     | .                  | .        | intergenic | .      | rs789800713         | 2 |
| AAAC.GTTT    | 5 | 98986513  | 98986531  | 4.75    | .                  | .        | intergenic | 0.084  | .                   | 4 |
| AT.AT        | 5 | 99038056  | 99038067  | 6       | ENSSSCT0000001012  | TMTC3    | intron     | 0.238  | rs787082636         | 2 |
| AAC.GTT      | 5 | 99184652  | 99184668  | 5.66667 | ENSSSCT0000001009  | C12orf50 | intron     | .      | rs791776910         | 2 |
| AAACC.GGTTT  | 5 | 99232719  | 99232742  | 4.8     | .                  | .        | intergenic | 0.094  | rs792408587         | 2 |
| AG.CT        | 5 | 99252202  | 99252211  | 5       | .                  | .        | intergenic | .      | .                   | 3 |
| AT.AT        | 5 | 99448667  | 99448677  | 5.5     | .                  | .        | intergenic | 0.016  | rs793140210         | 3 |
| AAAC.GTTT    | 5 | 99543046  | 99543065  | 5       | .                  | .        | intergenic | .      | rs792446462         | 2 |
| AC.GT        | 5 | 99567114  | 99567124  | 5.5     | .                  | .        | intergenic | 0.242  | rs789490730         | 3 |
| AAAC.GTTT    | 5 | 99635380  | 99635394  | 3.75    | .                  | .        | intergenic | 0.217  | rs791164280         | 2 |
| AC.GT        | 5 | 99655523  | 99655532  | 5       | .                  | .        | intergenic | 0.18   | .                   | 2 |
| AAAAT.ATTTT  | 5 | 99739353  | 99739374  | 3.66667 | .                  | .        | intergenic | -0.311 | rs79156633 rs7898   | 2 |
| AT.AT        | 5 | 99777775  | 99777785  | 5.5     | .                  | .        | intergenic | 0.091  | rs786751765         | 4 |
| AG.CT        | 5 | 99781165  | 99781176  | 6       | .                  | .        | intergenic | .      | rs786744983         | 2 |
| AC.GT        | 5 | 99805667  | 99805682  | 8       | .                  | .        | intergenic | 0.025  | .                   | 2 |
| AAAC.GTTT    | 5 | 99835855  | 99835873  | 4.75    | .                  | .        | intergenic | 0.408  | rs788575706         | 2 |
| AT.AT        | 5 | 100171373 | 100171394 | 11      | .                  | .        | intergenic | 0.807  | .                   | 2 |
| AG.CT        | 5 | 100405143 | 100405166 | 12      | .                  | .        | intergenic | .      | rs790633921         | 2 |
| AAT.ATT      | 5 | 100489003 | 100489027 | 8.33333 | .                  | .        | intergenic | .      | rs791926296         | 2 |
| AAAC.GTTT    | 5 | 100586993 | 100587011 | 4.75    | .                  | .        | intergenic | 0.104  | rs789592931         | 2 |
| ACAT.ATGT    | 5 | 100597485 | 100597503 | 4.75    | .                  | .        | intergenic | .      | rs79152025 rs7868   | 2 |
| AAAC.GTTT    | 5 | 100664482 | 100664518 | 9.25    | .                  | .        | intergenic | 0.324  | rs791383014 rs7894  | 2 |
| AAG.CTT      | 5 | 100670813 | 100670826 | 4.66667 | .                  | .        | intergenic | -0.003 | rs787028025         | 2 |
| AAAAC.GTTTT  | 5 | 100713210 | 100713225 | 3.2     | .                  | .        | intergenic | 0.264  | rs788748061         | 2 |
| AC.GT        | 5 | 100831729 | 100831739 | 5.5     | ENSSSCT0000001016  | MGAT4C   | intron     | -0.098 | .                   | 2 |
| AAT.ATT      | 5 | 100924308 | 100924321 | 4.66667 | ENSSSCT0000001016  | MGAT4C   | intron     | .      | rs786986584         | 2 |
| AAAAC.GTTTT  | 5 | 101229552 | 101229566 | 3       | .                  | .        | intergenic | 0.17   | rs791538043         | 2 |
| AG.CT        | 5 | 101334939 | 101334951 | 6.5     | .                  | .        | intergenic | -0.239 | rs791368063 rs7908  | 2 |
| AC.GT        | 5 | 101366158 | 101366178 | 10.5    | .                  | .        | intergenic | 0.035  | .                   | 2 |
| AAC.GTT      | 5 | 101382779 | 101382792 | 4.66667 | .                  | .        | intergenic | 0.539  | rs792371523         | 3 |
| AAC.GTT      | 5 | 101581153 | 101581176 | 8       | .                  | .        | intergenic | 0.143  | rs792113919         | 2 |
| AAAG.CTTT    | 5 | 101824015 | 101824026 | 3       | .                  | .        | intergenic | 0.025  | .                   | 2 |
| AATG.CATT    | 5 | 101836650 | 101836680 | 7.75    | .                  | .        | intergenic | 0.017  | rs790306807         | 2 |
| AAAT.ATTT    | 5 | 102429164 | 102429178 | 3.75    | .                  | .        | intergenic | .      | rs789910343         | 2 |
| AAAT.ATTT    | 5 | 102500583 | 102500601 | 4.75    | .                  | .        | intergenic | .      | rs788274717         | 2 |
| AAC.GTT      | 5 | 102521978 | 102521997 | 6.66667 | .                  | .        | intergenic | 0.006  | rs787471661         | 2 |
| AC.GT        | 5 | 102528401 | 102528413 | 6.5     | .                  | .        | intergenic | .      | rs786707720         | 2 |
| AAAG.CTTT    | 5 | 102760046 | 102760061 | 4       | .                  | .        | intergenic | 0.047  | rs791336271 rs7887  | 2 |
| AT.AT        | 5 | 102866686 | 102866696 | 5.5     | .                  | .        | intergenic | .      | .                   | 3 |
| AC.GT        | 5 | 103066996 | 103067007 | 6       | .                  | .        | intergenic | -0.046 | rs788166947         | 2 |
| AC.GT        | 5 | 103089638 | 103089659 | 11      | .                  | .        | intergenic | -0.006 | rs791712421 rs7906  | 2 |
| AAAT.ATTT    | 5 | 103102881 | 103102896 | 4       | .                  | .        | intergenic | .      | rs79182147 rs7931   | 2 |
| AAAT.ATTT    | 5 | 103153372 | 103153391 | 5       | .                  | .        | intergenic | 0.178  | rs791713230482      | 2 |
| AAAAC.GTTTT  | 5 | 103165836 | 103165854 | 3.8     | .                  | .        | intergenic | 0.092  | rs787448293         | 2 |
| AC.GT        | 5 | 103238932 | 103238943 | 6       | .                  | .        | intergenic | 0.516  | rs789520057         | 2 |
| ACAT.ATGT    | 5 | 103340754 | 103340788 | 8.75    | .                  | .        | intergenic | .      | .                   | 2 |
| AAAAT.ATTTT  | 5 | 103413916 | 103413937 | 3.66667 | .                  | .        | intergenic | 0.268  | rs791353114         | 2 |
| AC.GT        | 5 | 103553044 | 103553055 | 6       | ENSSSCT00000030219 | .        | intron     | 0.006  | .                   | 4 |
| AAAAC.GTTTT  | 5 | 103633421 | 103633441 | 4.2     | ENSSSCT00000030219 | .        | intron     | 0.395  | rs79176939 rs7931   | 2 |
| AAAC.GTTT    | 5 | 103640993 | 103641012 | 5       | ENSSSCT00000030219 | .        | intron     | 0.043  | rs791704214 rs7914  | 3 |

|              |   |           |           |         |                    |            |            |        |                 |   |
|--------------|---|-----------|-----------|---------|--------------------|------------|------------|--------|-----------------|---|
| AC.GT        | 5 | 103844708 | 103844718 | 5.5     | ENSSSCT00000029091 | .          | intron     | 0.014  | rs792339741     | 2 |
| AAAT.ATTT    | 5 | 103853189 | 103853203 | 3.75    | ENSSSCT00000029091 | .          | intron     | 0.314  | rs38279 rs7914  | 2 |
| AC.GT        | 5 | 104481681 | 104481690 | 5       | .                  | .          | intergenic | 0.041  | .               | 2 |
| AT.AT        | 5 | 104651246 | 104651258 | 6.5     | .                  | .          | intergenic | 0.036  | rs181602 rs7873 | 2 |
| AAAC.GTTT    | 5 | 104709317 | 104709331 | 3.75    | .                  | .          | intergenic | 0.007  | rs701516 rs7926 | 2 |
| AAAC.GTTT    | 5 | 104710553 | 104710578 | 6.5     | .                  | .          | intergenic | -0.043 | rs789579235     | 2 |
| AG.CT        | 5 | 105124433 | 105124443 | 5.5     | ENSSSCT00000001028 | PPFIA2     | intron     | -0.011 | rs792273119     | 2 |
| AGG.CCT      | 5 | 105403210 | 105403236 | 9       | .                  | .          | intergenic | 0.062  | rs164875 rs7862 | 2 |
| AAC.GTT      | 5 | 105635855 | 105635876 | 7.33333 | .                  | .          | intergenic | 0.046  | rs787854262     | 2 |
| AT.AT        | 5 | 105694646 | 105694655 | 5       | .                  | .          | intergenic | .      | .               | 3 |
| AAGC.GCTT    | 5 | 105817925 | 105817939 | 3.75    | .                  | .          | intergenic | 0.109  | .               | 2 |
| AAAAC.GTTTT  | 5 | 105877225 | 105877247 | 4.6     | ENSSSCT00000001032 | OTOGL      | intron     | .      | rs322441 rs7901 | 2 |
| AC.GT        | 5 | 105934008 | 105934027 | 10      | ENSSSCT00000001032 | OTOGL      | intron     | 1.535  | rs253799 rs7904 | 2 |
| AATG.CATT    | 5 | 106040257 | 106040272 | 4       | .                  | .          | intergenic | 0.151  | rs792452297     | 2 |
| AC.GT        | 5 | 106561427 | 106561441 | 7.5     | .                  | .          | intergenic | -0.146 | rs787288510     | 5 |
| AAC.GTT      | 5 | 106608966 | 106608979 | 4.66667 | ENSSSCT00000028012 | PPP1R12A   | intron     | 0.066  | rs790441227     | 2 |
| AGC.GCT      | 5 | 106922442 | 106922461 | 6.66667 | ENSSSCT00000001037 | SYT1       | intron     | 0.276  | rs392860 rs7903 | 2 |
| AAAC.GTTT    | 5 | 107240790 | 107240804 | 3.75    | .                  | .          | intergenic | -0.036 | rs792153024     | 2 |
| AC.GT        | 5 | 107321289 | 107321304 | 8       | .                  | .          | intergenic | -0.034 | rs777334 rs7888 | 2 |
| AAG.CTT      | 5 | 107327869 | 107327890 | 7.33333 | .                  | .          | intergenic | 0.114  | rs704144022     | 2 |
| ACAT.ATGT    | 5 | 107332071 | 107332087 | 4.25    | .                  | .          | intergenic | 0.306  | rs786450405     | 2 |
| AAAT.ATTT    | 5 | 107332126 | 107332138 | 3.25    | .                  | .          | intergenic | 0.281  | .               | 2 |
| AAAC.GTTT    | 5 | 107749297 | 107749319 | 5.75    | .                  | .          | intergenic | .      | rs325948 rs7930 | 2 |
| AAC.GTT      | 5 | 107752512 | 107752526 | 5       | .                  | .          | intergenic | .      | rs789608839     | 3 |
| ACATAT.ATATG | 5 | 107789606 | 107789624 | 3.16667 | .                  | .          | intergenic | 0.058  | rs190061 rs7909 | 2 |
| AC.GT        | 5 | 107953362 | 107953376 | 7.5     | .                  | .          | intergenic | -0.047 | rs788680210     | 2 |
| AAAAC.GTTTT  | 5 | 108084154 | 108084177 | 4.8     | .                  | .          | intergenic | 0.025  | rs326866 rs7895 | 2 |
| AAAT.ATTT    | 5 | 108163036 | 108163051 | 4       | .                  | .          | intergenic | 0.37   | rs304751 rs7936 | 2 |
| AAAC.GTTT    | 5 | 108215626 | 108215643 | 4.5     | ENSSSCT00000029790 | .          | intron     | 0.025  | rs786429846     | 2 |
| AAAC.GTTT    | 5 | 108215626 | 108215643 | 4.5     | ENSSSCT00000026141 | .          | intron     | 0.025  | rs786429846     | 2 |
| AAT.ATT      | 5 | 108228264 | 108228278 | 5       | ENSSSCT00000029790 | .          | intron     | 0.043  | .               | 2 |
| AAT.ATT      | 5 | 108228264 | 108228278 | 5       | ENSSSCT00000026141 | .          | intron     | 0.043  | .               | 2 |
| AAAC.GTTT    | 5 | 108316282 | 108316297 | 4       | .                  | .          | intergenic | -0.143 | rs786697709     | 2 |
| AAAC.GTTT    | 5 | 108428668 | 108428685 | 4.5     | .                  | .          | intergenic | -0.18  | rs358384 rs7918 | 2 |
| AG.CT        | 5 | 108551564 | 108551574 | 5.5     | .                  | .          | intergenic | -0.337 | rs787444513     | 3 |
| AC.GT        | 5 | 108700631 | 108700649 | 9.5     | .                  | .          | intergenic | 1.184  | .               | 2 |
| AAAC.GTTT    | 5 | 108752416 | 108752448 | 8.25    | .                  | .          | intergenic | 0.47   | rs786650 rs7918 | 3 |
| AT.AT        | 5 | 108839106 | 108839115 | 5       | .                  | .          | intergenic | .      | rs793366402     | 2 |
| AC.GT        | 5 | 108933984 | 108934003 | 10      | .                  | .          | intergenic | 0.117  | .               | 3 |
| AAAAG.CTTTT  | 5 | 108953723 | 108953743 | 4.2     | .                  | .          | intergenic | 0.444  | rs791147373     | 2 |
| AAAAC.GTTTT  | 5 | 109230938 | 109230963 | 5.2     | .                  | .          | intergenic | 0.146  | rs789009525     | 2 |
| ACAG.CTGT    | 5 | 109629922 | 109629947 | 6.5     | .                  | .          | intergenic | 0.149  | rs793288320     | 2 |
| AAT.ATT      | 5 | 110140135 | 110140150 | 5.33333 | .                  | .          | intergenic | 0.089  | .               | 2 |
| AT.AT        | 5 | 111124216 | 111124228 | 6.5     | .                  | .          | intergenic | .      | rs791670373     | 2 |
| AAAG.CTTT    | 5 | 111267203 | 111267225 | 5.75    | .                  | .          | intergenic | .      | rs790388463     | 2 |
| AC.GT        | 5 | 111336563 | 111336580 | 9       | .                  | .          | intergenic | -0.335 | .               | 2 |
| AAC.GTT      | 6 | 378111    | 378123    | 4.33333 | ENSSSCT00000031647 | FANCA      | promoter   | .      | rs792311531     | 2 |
| CCCG.CGGG    | 6 | 871151    | 871172    | 5.5     | ENSSSCT00000026558 | sc-mir-433 | promoter   | .      | .               | 2 |
| AAC.GTT      | 6 | 950394    | 950418    | 8.33333 | .                  | .          | intergenic | .      | rs147685 rs7919 | 2 |
| AC.GT        | 6 | 1808171   | 1808182   | 6       | ENSSSCT00000002944 | JPH3       | intron     | .      | rs786537211     | 4 |
| AC.GT        | 6 | 2090337   | 2090359   | 11.5    | ENSSSCT00000002948 | C16orf95   | intron     | .      | .               | 2 |
| AC.GT        | 6 | 2096963   | 2096972   | 5       | ENSSSCT00000002948 | C16orf95   | intron     | .      | .               | 4 |
| AAAG.CTTT    | 6 | 2153902   | 2153933   | 8       | .                  | .          | intergenic | .      | .               | 2 |
| AAT.ATT      | 6 | 2774126   | 2774139   | 4.66667 | ENSSSCT00000002951 | MTHFSD     | intron     | 0.083  | rs788889925     | 2 |
| AAC.GTT      | 6 | 5362612   | 5362634   | 7.66667 | ENSSSCT00000002977 | CDH13      | intron     | 0.013  | rs789835452     | 2 |
| AT.AT        | 6 | 5365210   | 5365223   | 7       | ENSSSCT00000002977 | CDH13      | promoter   | -0.167 | rs734637 rs7928 | 2 |
| AAAT.ATTT    | 6 | 5372422   | 5372434   | 3.25    | .                  | .          | intergenic | 0.23   | rs786459183     | 2 |
| AG.CT        | 6 | 5478002   | 5478018   | 8.5     | .                  | .          | intergenic | -0.272 | rs341981 rs7926 | 2 |
| AGGG.CCCT    | 6 | 5516330   | 5516346   | 4.25    | .                  | .          | intergenic | -0.08  | rs788017161     | 2 |
| AT.AT        | 6 | 5609288   | 5609298   | 5.5     | ENSSSCT00000031996 | .          | intron     | 0.483  | rs787469867     | 2 |
| AG.CT        | 6 | 5625620   | 5625631   | 6       | ENSSSCT00000031996 | .          | intron     | -0.005 | .               | 2 |
| AC.GT        | 6 | 5723333   | 5723349   | 8.5     | ENSSSCT00000031996 | .          | intron     | -0.404 | rs791377347     | 4 |
| AC.GT        | 6 | 6037174   | 6037192   | 9.5     | .                  | .          | intergenic | .      | rs787796378     | 2 |
| AAAAC.GTTTT  | 6 | 6225985   | 6226010   | 5.2     | .                  | .          | intergenic | -0.215 | .               | 2 |
| AC.GT        | 6 | 6724703   | 6724719   | 8.5     | .                  | .          | intergenic | 0.506  | rs787628292     | 2 |
| AAAC.GTTT    | 6 | 6746198   | 6746215   | 4.5     | .                  | .          | intergenic | 0.03   | rs788833230     | 2 |
| ACC.GGT      | 6 | 7120597   | 7120614   | 6       | .                  | .          | intergenic | .      | rs792010823     | 2 |
| AC.GT        | 6 | 7254719   | 7254730   | 6       | ENSSSCT00000002982 | CMIP       | intron     | -0.498 | rs745519 rs7893 | 3 |
| AC.GT        | 6 | 7255807   | 7255833   | 13.5    | ENSSSCT00000002982 | CMIP       | intron     | -0.065 | rs787202640     | 4 |
| AAT.ATT      | 6 | 7423480   | 7423497   | 6       | .                  | .          | intergenic | .      | .               | 2 |
| AAG.CTT      | 6 | 7456080   | 7456093   | 4.66667 | .                  | .          | intergenic | -0.237 | rs788634545     | 2 |
| AAAT.ATTT    | 6 | 7628139   | 7628156   | 4.5     | .                  | .          | intergenic | -0.089 | rs791685293     | 2 |
| AAC.GTT      | 6 | 8224735   | 8224746   | 4       | .                  | .          | intergenic | -0.18  | .               | 2 |
| AC.GT        | 6 | 8238221   | 8238233   | 6.5     | .                  | .          | intergenic | -0.266 | rs793656766     | 4 |
| AC.GT        | 6 | 8303238   | 8303257   | 10      | .                  | .          | intergenic | -0.099 | rs793458584     | 2 |
| AAAC.GTTT    | 6 | 8581625   | 8581644   | 5       | .                  | .          | intergenic | 1.357  | rs789251516     | 2 |
| AAAAC.GTTTT  | 6 | 9241129   | 9241151   | 4.6     | .                  | .          | intergenic | -0.212 | rs791592969     | 2 |
| AAAC.GTTT    | 6 | 9265295   | 9265308   | 3.5     | .                  | .          | intergenic | -0.055 | rs793372061     | 2 |
| AT.AT        | 6 | 9335214   | 9335224   | 5.5     | .                  | .          | intergenic | 0.517  | .               | 3 |
| AAAT.ATTT    | 6 | 9453824   | 9453850   | 6.75    | .                  | .          | intergenic | -0.102 | rs130217 rs7938 | 3 |
| AC.GT        | 6 | 9463270   | 9463294   | 12.5    | .                  | .          | intergenic | -0.04  | rs332942 rs7886 | 3 |
| AAAG.CTTT    | 6 | 9473982   | 9473996   | 3.75    | .                  | .          | intergenic | 0.638  | rs788625446     | 2 |
| ACGG.CCGT    | 6 | 9779838   | 9779854   | 4.25    | .                  | .          | intergenic | 0.055  | rs789563233     | 2 |
| AAAC.GTTT    | 6 | 10319287  | 10319301  | 3.75    | .                  | .          | intergenic | -0.166 | rs786727791     | 2 |

|              |   |          |          |         |                    |         |            |        |                    |   |
|--------------|---|----------|----------|---------|--------------------|---------|------------|--------|--------------------|---|
| AC.GT        | 6 | 10652123 | 10652139 | 8.5     | .                  | .       | intergenic | -0.179 | rs787288479        | 3 |
| AC.GT        | 6 | 10780709 | 10780727 | 9.5     | .                  | .       | intergenic | 0.008  | .                  | 5 |
| AAAT.ATTT    | 6 | 10799819 | 10799833 | 3.75    | .                  | .       | intergenic | .      | .                  | 2 |
| AAAC.GTTT    | 6 | 10932857 | 10932873 | 4.25    | .                  | .       | intergenic | -0.121 | rs786943940        | 2 |
| AG.CT        | 6 | 11175333 | 11175345 | 6.5     | ENSSSCT00000032493 | .       | intron     | 0.218  | rs791152904        | 2 |
| AC.GT        | 6 | 11217572 | 11217598 | 13.5    | ENSSSCT00000032493 | .       | intron     | 0.034  | rs791636009        | 2 |
| AAAAAT.ATTTT | 6 | 11271803 | 11271832 | 5       | ENSSSCT00000032493 | .       | intron     | .      | rs799013 rs7883    | 2 |
| AT.AT        | 6 | 11277409 | 11277420 | 6       | ENSSSCT00000032493 | .       | intron     | .      | .                  | 3 |
| AAAAC.GTTT   | 6 | 11516966 | 11516984 | 3.8     | .                  | .       | intergenic | .      | rs793193992        | 2 |
| AAC.GTT      | 6 | 11594402 | 11594418 | 5.66667 | .                  | .       | intergenic | .      | rs793031 rs7870    | 2 |
| AAAT.ATTT    | 6 | 11613189 | 11613209 | 5.25    | .                  | .       | intergenic | 0.339  | rs791754170        | 2 |
| AC.GT        | 6 | 11663713 | 11663733 | 10.5    | .                  | .       | intergenic | .      | rs789273733        | 4 |
| AT.AT        | 6 | 11793005 | 11793035 | 15.5    | .                  | .       | intergenic | 0.53   | rs789115220        | 2 |
| AAAC.GTTT    | 6 | 11852390 | 11852412 | 5.75    | .                  | .       | intergenic | .      | rs786391027        | 2 |
| AT.AT        | 6 | 11975349 | 11975358 | 5       | ENSSSCT0000003001  | ABARAPL | promoter   | 0.141  | .                  | 2 |
| AAAC.GTTT    | 6 | 11988354 | 11988374 | 5.25    | ENSSSCT0000003002  | .       | intron     | .      | .                  | 2 |
| AAAT.ATTT    | 6 | 12287445 | 12287472 | 7       | .                  | .       | intergenic | .      | rs793138834        | 2 |
| AGG.CCT      | 6 | 12430547 | 12430561 | 5       | .                  | .       | intergenic | 0.836  | rs793718079        | 2 |
| AC.GT        | 6 | 12472449 | 12472463 | 7.5     | .                  | .       | intergenic | .      | rs788706545        | 3 |
| AAAC.GTTT    | 6 | 12603088 | 12603108 | 5.25    | .                  | .       | intergenic | 0.216  | rs789505479        | 2 |
| AAAC.GTTT    | 6 | 12654044 | 12654063 | 5       | ENSSSCT00000028190 | .       | intron     | 0.041  | rs788701712        | 2 |
| AG.CT        | 6 | 12835665 | 12835682 | 9       | ENSSSCT0000003012  | FA2H    | intron     | -0.215 | rs7919668 rs7901   | 2 |
| AAAC.GTTT    | 6 | 12863975 | 12863995 | 5.25    | .                  | .       | intergenic | .      | rs786733053        | 2 |
| AAAT.ATTT    | 6 | 13005970 | 13005988 | 4.75    | ENSSSCT00000030720 | GLG1    | intron     | .      | rs788610045        | 2 |
| AAC.GTT      | 6 | 13041104 | 13041120 | 5.66667 | ENSSSCT00000030720 | GLG1    | intron     | .      | rs788234911        | 2 |
| AAAAC.GTTT   | 6 | 13248535 | 13248558 | 4.8     | ENSSSCT0000003016  | .       | intron     | .      | rs787384955        | 2 |
| AC.GT        | 6 | 13369712 | 13369739 | 14      | ENSSSCT0000003017  | AARS    | intron     | -0.399 | rs7914065 rs7868   | 3 |
| AAG.CTT      | 6 | 13626375 | 13626393 | 6.33333 | .                  | .       | intergenic | .      | rs793078644        | 2 |
| AG.CT        | 6 | 13639120 | 13639131 | 6       | .                  | .       | intergenic | -0.011 | rs789296301        | 2 |
| AC.GT        | 6 | 13685755 | 13685764 | 5       | .                  | .       | intergenic | -0.221 | rs791768728        | 2 |
| AAAC.GTTT    | 6 | 13686298 | 13686312 | 3.75    | .                  | .       | intergenic | .      | rs787861254        | 2 |
| AT.AT        | 6 | 13791107 | 13791119 | 6.5     | ENSSSCT0000003024  | .       | intron     | .      | rs790429271        | 2 |
| AAAT.ATTT    | 6 | 13882584 | 13882601 | 4.5     | .                  | .       | intergenic | 0.064  | rs79242146 rs7891  | 2 |
| AGATAT.ATATC | 6 | 13979674 | 13979703 | 5       | ENSSSCT0000003034  | ZNF23   | promoter   | .      | rs786691656        | 2 |
| AAGG.CCTT    | 6 | 14406477 | 14406495 | 4.75    | .                  | .       | intergenic | .      | rs79163218 rs7900  | 2 |
| AAAT.ATTT    | 6 | 14737527 | 14737549 | 5.75    | .                  | .       | intergenic | 0.147  | rs792698507        | 2 |
| AT.AT        | 6 | 14767978 | 14767992 | 7.5     | .                  | .       | intergenic | .      | .                  | 3 |
| AAC.GTT      | 6 | 14949942 | 14949956 | 5       | .                  | .       | intergenic | .      | rs79161033 rs7917  | 2 |
| AT.AT        | 6 | 15002446 | 15002462 | 8.5     | .                  | .       | intergenic | 0.022  | .                  | 2 |
| AC.GT        | 6 | 15183552 | 15183565 | 7       | .                  | .       | intergenic | -0.008 | rs787695299        | 4 |
| AAAT.ATTT    | 6 | 15664397 | 15664411 | 3.75    | .                  | .       | intergenic | 0.228  | rs790653835        | 2 |
| AC.GT        | 6 | 15772699 | 15772723 | 12.5    | .                  | .       | intergenic | 0.845  | .                  | 3 |
| AG.CT        | 6 | 15783251 | 15783269 | 9.5     | .                  | .       | intergenic | -0.025 | rs792829310        | 2 |
| AT.AT        | 6 | 15853618 | 15853629 | 6       | .                  | .       | intergenic | .      | rs786775775        | 2 |
| AT.AT        | 6 | 15866361 | 15866371 | 5.5     | .                  | .       | intergenic | 0.032  | rs791475087        | 2 |
| AG.CT        | 6 | 15874807 | 15874831 | 12.5    | .                  | .       | intergenic | 1.078  | rs786210449        | 2 |
| AC.GT        | 6 | 15875040 | 15875057 | 9       | .                  | .       | intergenic | 1.534  | rs791872566        | 3 |
| AAAAAG.CTTT  | 6 | 15931495 | 15931520 | 4.33333 | .                  | .       | intergenic | 0.197  | rs790180018        | 2 |
| AAAAC.GTTT   | 6 | 15991205 | 15991223 | 3.8     | .                  | .       | intergenic | -0.03  | rs789437113        | 2 |
| AC.GT        | 6 | 16006098 | 16006109 | 6       | .                  | .       | intergenic | 0.051  | rs786447286        | 2 |
| AG.CT        | 6 | 16021914 | 16021924 | 5.5     | .                  | .       | intergenic | 0.006  | .                  | 2 |
| AC.GT        | 6 | 16057764 | 16057773 | 5       | .                  | .       | intergenic | 0.026  | .                  | 2 |
| AC.GT        | 6 | 16063969 | 16063982 | 7       | .                  | .       | intergenic | 0.611  | rs786227279        | 2 |
| AAC.GTT      | 6 | 16235596 | 16235609 | 4.66667 | .                  | .       | intergenic | .      | rs791615076        | 2 |
| AAAAAT.ATTT  | 6 | 16541868 | 16541891 | 4.8     | .                  | .       | intergenic | .      | rs787947947        | 2 |
| AT.AT        | 6 | 16618840 | 16618851 | 6       | .                  | .       | intergenic | .      | rs787942805        | 2 |
| AT.AT        | 6 | 17023272 | 17023287 | 8       | .                  | .       | intergenic | .      | .                  | 4 |
| AG.CT        | 6 | 17203467 | 17203477 | 5.5     | ENSSSCT0000003119  | ARL2BP  | intron     | 1.921  | rs7905991 rs7886   | 2 |
| AG.CT        | 6 | 17235162 | 17235171 | 5       | .                  | .       | intergenic | 0.21   | rs790330890        | 2 |
| AC.GT        | 6 | 17301766 | 17301787 | 11      | .                  | .       | intergenic | -0.084 | .                  | 4 |
| AAAC.GTTT    | 6 | 17318233 | 17318257 | 6.25    | .                  | .       | intergenic | -0.275 | rs793834986        | 2 |
| AC.GT        | 6 | 17828278 | 17828287 | 5       | ENSSSCT0000003111  | CNGB1   | intron     | 0.982  | rs787124819        | 3 |
| AAAC.GTTT    | 6 | 17956378 | 17956409 | 8       | ENSSSCT0000003106  | MMP15   | intron     | -0.015 | rs786570868        | 2 |
| AC.GT        | 6 | 18061804 | 18061813 | 5       | ENSSSCT0000003104  | CSNK2A2 | intron     | -0.072 | .                  | 2 |
| AC.GT        | 6 | 18133876 | 18133895 | 10      | ENSSSCT0000003103  | .       | intron     | .      | rs791530019        | 2 |
| ACTC.GAGT    | 6 | 18276711 | 18276732 | 5.5     | .                  | .       | intergenic | -0.008 | rs7903650 rs7887   | 2 |
| ATCC.GGAT    | 6 | 18280224 | 18280252 | 7.25    | .                  | .       | intergenic | 0.093  | rs791744926 rs7917 | 3 |
| AAAT.ATTT    | 6 | 18384609 | 18384622 | 3.5     | .                  | .       | intergenic | .      | rs790307644        | 2 |
| AAAC.GTTT    | 6 | 18401161 | 18401182 | 5.5     | .                  | .       | intergenic | .      | rs792345757        | 2 |
| AAAC.GTTT    | 6 | 18418121 | 18418148 | 7       | ENSSSCT00000023952 | CNOT1   | intron     | 0.14   | rs787328756        | 2 |
| AAAC.GTTT    | 6 | 18418121 | 18418148 | 7       | ENSSSCT0000003099  | CNOT1   | intron     | 0.14   | rs787328756        | 2 |
| AAAG.CTTT    | 6 | 18525393 | 18525412 | 5       | .                  | .       | intergenic | 0.163  | rs79343443 rs7865  | 3 |
| AT.AT        | 6 | 18715904 | 18715916 | 6.5     | .                  | .       | intergenic | .      | rs7921876 rs7928   | 2 |
| AAC.GTT      | 6 | 18798448 | 18798463 | 5.33333 | .                  | .       | intergenic | .      | rs789663312        | 2 |
| AAAT.ATTT    | 6 | 18850230 | 18850261 | 8       | .                  | .       | intergenic | 0.162  | rs788451449        | 2 |
| AC.GT        | 6 | 19005040 | 19005061 | 11      | .                  | .       | intergenic | 0.059  | .                  | 2 |
| AAAC.GTTT    | 6 | 19010162 | 19010176 | 3.75    | .                  | .       | intergenic | 0.229  | rs79344434 rs7864  | 2 |
| ACAT.ATGT    | 6 | 19189278 | 19189293 | 4       | .                  | .       | intergenic | 0.019  | rs79299639 rs7925  | 2 |
| AAC.GTT      | 6 | 19249501 | 19249519 | 6.33333 | .                  | .       | intergenic | .      | rs79380512 rs6947  | 3 |
| ACC.GGT      | 6 | 19541590 | 19541602 | 4.33333 | .                  | .       | intergenic | -0.09  | .                  | 2 |
| AAAAAC.GTTT  | 6 | 19636054 | 19636077 | 4.8     | .                  | .       | intergenic | .      | rs789700371        | 2 |
| AC.GT        | 6 | 19783751 | 19783766 | 8       | .                  | .       | intergenic | -0.079 | .                  | 3 |
| AAT.ATT      | 6 | 20010193 | 20010209 | 5.66667 | .                  | .       | intergenic | .      | rs792696368341     | 2 |
| AC.GT        | 6 | 20544654 | 20544664 | 5.5     | .                  | .       | intergenic | -0.131 | .                  | 4 |

|             |   |          |          |         |                    |        |            |        |               |   |
|-------------|---|----------|----------|---------|--------------------|--------|------------|--------|---------------|---|
| AGAT.ATCT   | 6 | 20566193 | 20566224 | 8       | .                  | .      | intergenic | .      | rs789497309   | 2 |
| AAAT.ATTT   | 6 | 20865349 | 20865368 | 5       | .                  | .      | intergenic | -0.16  | rs790471246   | 2 |
| AC.GT       | 6 | 20973058 | 20973068 | 5.5     | .                  | .      | intergenic | .      | rs786609071   | 3 |
| AAT.ATT     | 6 | 21239921 | 21239956 | 12      | .                  | .      | intergenic | 0.222  | .             | 2 |
| AAC.GTT     | 6 | 21366631 | 21366654 | 8       | .                  | .      | intergenic | -0.249 | 339505 rs7912 | 2 |
| ACAG.CTGT   | 6 | 21488229 | 21488246 | 4.5     | .                  | .      | intergenic | .      | rs788960983   | 2 |
| AC.GT       | 6 | 21504952 | 21504966 | 7.5     | .                  | .      | intergenic | -0.279 | 700475 rs7890 | 3 |
| AG.CT       | 6 | 21594205 | 21594215 | 5.5     | .                  | .      | intergenic | 0.509  | 353340 rs7934 | 2 |
| AAC.GTT     | 6 | 21618019 | 21618033 | 5       | .                  | .      | intergenic | 0.093  | .             | 2 |
| AT.AT       | 6 | 21624146 | 21624157 | 6       | .                  | .      | intergenic | 0.155  | rs791411398   | 2 |
| ACT.AGT     | 6 | 21723169 | 21723187 | 6.33333 | .                  | .      | intergenic | 0.047  | 189309 rs7938 | 2 |
| AAAC.GTTT   | 6 | 21723577 | 21723597 | 5.25    | .                  | .      | intergenic | .      | 520342 rs7887 | 2 |
| AAC.GTT     | 6 | 21833661 | 21833680 | 6.66667 | .                  | .      | intergenic | 0.053  | .             | 2 |
| AG.CT       | 6 | 21840078 | 21840094 | 8.5     | .                  | .      | intergenic | .      | .             | 2 |
| AAC.GTT     | 6 | 21870140 | 21870152 | 4.33333 | .                  | .      | intergenic | -0.21  | 311581 rs7933 | 2 |
| AAAC.GTTT   | 6 | 21901151 | 21901167 | 4.25    | .                  | .      | intergenic | 0.007  | rs790516338   | 2 |
| AAAC.GTTT   | 6 | 22054085 | 22054099 | 3.75    | .                  | .      | intergenic | 0.091  | rs792824711   | 2 |
| AG.CT       | 6 | 22132905 | 22132916 | 6       | .                  | .      | intergenic | -0.192 | rs793604302   | 3 |
| AC.GT       | 6 | 22556037 | 22556059 | 11.5    | .                  | .      | intergenic | 0.313  | rs793820021   | 2 |
| AAAC.GTTT   | 6 | 22592472 | 22592495 | 6       | .                  | .      | intergenic | -0.002 | 301225 rs7872 | 2 |
| AAAAT.ATTTT | 6 | 22621776 | 22621792 | 3.4     | .                  | .      | intergenic | -0.114 | rs790262664   | 2 |
| AC.GT       | 6 | 22755687 | 22755700 | 7       | .                  | .      | intergenic | -0.092 | 368226 rs7894 | 2 |
| AC.GT       | 6 | 22821417 | 22821428 | 6       | .                  | .      | intergenic | 0.281  | rs789401165   | 2 |
| AT.AT       | 6 | 22905956 | 22905968 | 6.5     | .                  | .      | intergenic | 0.729  | 395789 rs7927 | 4 |
| AC.GT       | 6 | 23184335 | 23184344 | 5       | .                  | .      | intergenic | 0.513  | .             | 2 |
| AC.GT       | 6 | 23478550 | 23478560 | 5.5     | .                  | .      | intergenic | -0.185 | 367669 rs7928 | 2 |
| AAC.GTT     | 6 | 23731863 | 23731885 | 7.66667 | ENSSSCT00000035974 | CDH11  | intron     | -0.033 | .             | 2 |
| AAC.GTT     | 6 | 23731863 | 23731885 | 7.66667 | ENSSSCT00000033754 | CDH11  | intron     | -0.033 | .             | 2 |
| AAC.GTT     | 6 | 23731863 | 23731885 | 7.66667 | ENSSSCT0000003095  | CDH11  | intron     | -0.033 | .             | 2 |
| AAC.GTT     | 6 | 23731863 | 23731885 | 7.66667 | ENSSSCT00000033473 | CDH11  | intron     | -0.033 | .             | 2 |
| AC.GT       | 6 | 23747861 | 23747872 | 6       | ENSSSCT00000035974 | CDH11  | intron     | -0.26  | .             | 2 |
| AC.GT       | 6 | 23747861 | 23747872 | 6       | ENSSSCT00000033754 | CDH11  | intron     | -0.26  | .             | 2 |
| AC.GT       | 6 | 23747861 | 23747872 | 6       | ENSSSCT0000003095  | CDH11  | intron     | -0.26  | .             | 2 |
| AC.GT       | 6 | 23747861 | 23747872 | 6       | ENSSSCT00000033473 | CDH11  | intron     | -0.26  | .             | 2 |
| AC.GT       | 6 | 23747861 | 23747872 | 6       | ENSSSCT00000032635 | CDH11  | intron     | -0.26  | .             | 2 |
| AAAT.ATTT   | 6 | 23838643 | 23838668 | 6.5     | .                  | .      | intergenic | 0.097  | 363017 rs7927 | 2 |
| AAT.ATT     | 6 | 23839088 | 23839116 | 9.66667 | .                  | .      | intergenic | -0.191 | rs790535487   | 2 |
| AAAC.GTTT   | 6 | 23973436 | 23973456 | 5.25    | .                  | .      | intergenic | -0.06  | 333689 rs7862 | 2 |
| ACC.GGT     | 6 | 23993779 | 23993791 | 4.33333 | .                  | .      | intergenic | -0.054 | rs792457477   | 2 |
| AATG.CATT   | 6 | 24042330 | 24042344 | 3.75    | .                  | .      | intergenic | 0.246  | .             | 2 |
| AT.AT       | 6 | 24180259 | 24180268 | 5       | .                  | .      | intergenic | 0.535  | rs792971688   | 3 |
| AG.CT       | 6 | 24232623 | 24232632 | 5       | .                  | .      | intergenic | -0.095 | .             | 2 |
| AG.CT       | 6 | 24406628 | 24406639 | 6       | .                  | .      | intergenic | 0.072  | rs791963968   | 2 |
| AC.GT       | 6 | 24413402 | 24413414 | 6.5     | .                  | .      | intergenic | 0.073  | rs792178891   | 3 |
| AAAC.GTTT   | 6 | 24731853 | 24731876 | 6       | .                  | .      | intergenic | 0.098  | 305410 rs7896 | 2 |
| AGGG.CCCT   | 6 | 24928145 | 24928162 | 4.5     | .                  | .      | intergenic | -0.005 | rs790739864   | 2 |
| AAAC.GTTT   | 6 | 25416202 | 25416213 | 3       | .                  | .      | intergenic | .      | rs786443610   | 2 |
| AAAAC.GTTTT | 6 | 26171879 | 26171900 | 3.66667 | ENSSSCT0000003062  | SMPD3  | intron     | 0.169  | rs789498524   | 2 |
| AC.GT       | 6 | 26491622 | 26491631 | 5       | .                  | .      | intergenic | .      | .             | 2 |
| AG.CT       | 6 | 26707227 | 26707237 | 5.5     | .                  | .      | intergenic | 0.263  | rs787237475   | 2 |
| AAAT.ATTT   | 6 | 27450864 | 27450882 | 4.75    | .                  | .      | intergenic | -0.071 | rs791477237   | 2 |
| AAAAG.CTTTT | 6 | 27501712 | 27501732 | 4.2     | ENSSSCT0000003129  | LPCAT2 | intron     | -0.217 | rs787050448   | 2 |
| AGC.GCT     | 6 | 27674204 | 27674219 | 5.33333 | .                  | .      | intergenic | 0.503  | 240471 rs7905 | 2 |
| AG.CT       | 6 | 27676335 | 27676351 | 8.5     | .                  | .      | intergenic | 0.658  | 103568 rs7921 | 2 |
| AG.CT       | 6 | 27696995 | 27697015 | 10.5    | .                  | .      | intergenic | 0.272  | 186332 rs7877 | 2 |
| AAAC.GTTT   | 6 | 28028926 | 28028947 | 5.5     | .                  | .      | intergenic | 0.018  | rs786872448   | 2 |
| AAT.ATT     | 6 | 28260408 | 28260424 | 5.66667 | .                  | .      | intergenic | 1.366  | .             | 2 |
| AAC.GTT     | 6 | 28401362 | 28401378 | 5.66667 | .                  | .      | intergenic | 1.221  | rs788920971   | 2 |
| AAAC.GTTT   | 6 | 28525459 | 28525490 | 8       | .                  | .      | intergenic | -0.121 | 353611 rs7893 | 2 |
| AAAAC.GTTTT | 6 | 28775281 | 28775300 | 4       | .                  | .      | intergenic | 0.047  | .             | 2 |
| AT.AT       | 6 | 28878339 | 28878350 | 6       | .                  | .      | intergenic | 0.149  | rs791418990   | 2 |
| ATCC.GGAT   | 6 | 28903119 | 28903151 | 8.25    | .                  | .      | intergenic | -0.145 | 308521 rs7871 | 2 |
| AAG.CTT     | 6 | 29273069 | 29273080 | 4       | .                  | .      | intergenic | .      | 726750 rs7916 | 2 |
| AAAG.CTTT   | 6 | 29403535 | 29403558 | 6       | ENSSSCT0000003136  | TOX3   | intron     | -0.18  | .             | 2 |
| AC.GT       | 6 | 29755746 | 29755758 | 6.5     | .                  | .      | intergenic | -0.189 | rs787467010   | 4 |
| AC.GT       | 6 | 29781243 | 29781256 | 7       | .                  | .      | intergenic | 0.113  | rs787826106   | 2 |
| AT.AT       | 6 | 29938514 | 29938524 | 5.5     | .                  | .      | intergenic | -0.25  | rs789889385   | 2 |
| AC.GT       | 6 | 30085584 | 30085594 | 5.5     | .                  | .      | intergenic | .      | .             | 2 |
| AG.CT       | 6 | 30202809 | 30202825 | 8.5     | .                  | .      | intergenic | 0.065  | rs786701782   | 2 |
| AAAAC.GTTTT | 6 | 30254966 | 30254985 | 4       | .                  | .      | intergenic | 0.083  | rs788829139   | 4 |
| AC.GT       | 6 | 30264054 | 30264072 | 9.5     | .                  | .      | intergenic | 1.231  | .             | 4 |
| AC.GT       | 6 | 30272965 | 30272978 | 7       | .                  | .      | intergenic | 0.021  | rs789844702   | 2 |
| AG.CT       | 6 | 30331666 | 30331677 | 6       | .                  | .      | intergenic | 0.004  | 390848 rs7883 | 3 |
| AAAAT.ATTTT | 6 | 30809995 | 30810014 | 4       | .                  | .      | intergenic | .      | rs793492673   | 2 |
| AC.GT       | 6 | 30964673 | 30964689 | 8.5     | .                  | .      | intergenic | 0.093  | 335663 rs7888 | 2 |
| AAAC.GTTT   | 6 | 31241391 | 31241409 | 4.75    | .                  | .      | intergenic | -0.125 | rs788439298   | 2 |
| AAAC.GTTT   | 6 | 31372949 | 31372962 | 3.5     | .                  | .      | intergenic | -0.214 | rs788453390   | 2 |
| AAAC.GTTT   | 6 | 31635931 | 31635945 | 3.75    | .                  | .      | intergenic | .      | rs788227585   | 2 |
| AAAC.GTTT   | 6 | 31665852 | 31665881 | 7.5     | .                  | .      | intergenic | .      | 198211 rs7888 | 2 |
| AAAC.GTTT   | 6 | 31695255 | 31695277 | 5.75    | .                  | .      | intergenic | -0.027 | 145711 rs7883 | 2 |
| ATC.GAT     | 6 | 31987264 | 31987277 | 4.66667 | .                  | .      | intergenic | -0.022 | rs790433018   | 2 |
| AG.CT       | 6 | 32230271 | 32230281 | 5.5     | ENSSSCT0000003145  | PHKB   | intron     | 0.317  | rs790108291   | 4 |
| AAAAG.CTTTT | 6 | 32347599 | 32347616 | 3.6     | ENSSSCT0000003145  | PHKB   | intron     | .      | rs791989465   | 2 |
| AG.CT       | 6 | 32459667 | 32459678 | 6       | .                  | .      | intergenic | 0.277  | rs792166104   | 2 |

|             |   |          |          |         |                    |          |            |        |                   |   |
|-------------|---|----------|----------|---------|--------------------|----------|------------|--------|-------------------|---|
| AAAC.GTTT   | 6 | 32685355 | 32685370 | 4       | .                  | .        | intergenic | -0.298 | rs788917956       | 2 |
| AGAGG.CCTCT | 6 | 32727017 | 32727037 | 4.2     | ENSSSCT00000030872 | .        | intron     | .      | rs787509508       | 2 |
| AAAC.GTTT   | 6 | 32816287 | 32816314 | 7       | .                  | .        | intergenic | .      | rs791343785       | 2 |
| AAC.GTT     | 6 | 32899066 | 32899082 | 5.66667 | ENSSSCT00000003148 | GPT2     | intron     | -0.177 | rs793340720       | 2 |
| AAAT.ATTT   | 6 | 32950733 | 32950751 | 4.75    | .                  | .        | intergenic | 0.146  | rs786402809       | 2 |
| AAAC.GTTT   | 6 | 33302901 | 33302923 | 5.75    | .                  | .        | intergenic | .      | rs793783039       | 3 |
| AAAG.CTTT   | 6 | 33338749 | 33338772 | 6       | .                  | .        | intergenic | .      | rs792470813       | 2 |
| AAC.GTT     | 6 | 33709343 | 33709361 | 6.33333 | .                  | .        | intergenic | .      | rs787326876       | 2 |
| AAT.ATT     | 6 | 33809784 | 33809808 | 8.33333 | .                  | .        | intergenic | .      | rs791423199       | 2 |
| AAAC.GTTT   | 6 | 34262759 | 34262775 | 4.25    | .                  | .        | intergenic | -0.296 | rs793157 rs7905   | 2 |
| AAAC.GTTT   | 6 | 34442993 | 34443015 | 5.75    | .                  | .        | intergenic | 0.138  | rs792778222       | 2 |
| AT.AT       | 6 | 34500560 | 34500574 | 7.5     | .                  | .        | intergenic | .      | rs789338429       | 2 |
| ACAT.ATGT   | 6 | 34844453 | 34844475 | 5.75    | ENSSSCT00000020081 | U6       | promoter   | .      | rs790978426       | 4 |
| AC.GT       | 6 | 34934289 | 34934299 | 5.5     | .                  | .        | intergenic | -0.031 | rs786900842       | 3 |
| AAAAC.GTTTT | 6 | 35030574 | 35030596 | 3.83333 | ENSSSCT00000003155 | POP4     | intron     | -0.099 | rs793303126       | 2 |
| AT.AT       | 6 | 35273611 | 35273623 | 6.5     | .                  | .        | intergenic | .      | rs792521501       | 2 |
| AT.AT       | 6 | 35274702 | 35274713 | 6       | .                  | .        | intergenic | .      | rs788998404       | 2 |
| AAAC.GTTT   | 6 | 35499672 | 35499689 | 4.5     | .                  | .        | intergenic | .      | rs787905383       | 2 |
| AC.GT       | 6 | 35560955 | 35560987 | 16.5    | .                  | .        | intergenic | -0.615 | .                 | 2 |
| AAT.ATT     | 6 | 35597340 | 35597361 | 7.33333 | .                  | .        | intergenic | -0.153 | rs793751 rs7934   | 2 |
| AC.GT       | 6 | 36034652 | 36034669 | 9       | ENSSSCT00000026089 | ZNF536   | intron     | .      | rs786423523       | 2 |
| AC.GT       | 6 | 36034652 | 36034669 | 9       | ENSSSCT00000024971 | ZNF536   | intron     | .      | rs786423523       | 2 |
| AT.AT       | 6 | 36090836 | 36090846 | 5.5     | .                  | .        | intergenic | -0.124 | rs789042 rs7931   | 2 |
| AC.GT       | 6 | 36126944 | 36126968 | 12.5    | .                  | .        | intergenic | -0.231 | rs792414955       | 2 |
| AG.CT       | 6 | 36507229 | 36507256 | 14      | .                  | .        | intergenic | 1.227  | rs786325930       | 2 |
| AC.GT       | 6 | 36577793 | 36577821 | 14.5    | .                  | .        | intergenic | -0.341 | rs793744013       | 2 |
| AC.GT       | 6 | 36602247 | 36602266 | 10      | .                  | .        | intergenic | 0.006  | rs708510675       | 2 |
| AC.GT       | 6 | 36943987 | 36943998 | 6       | .                  | .        | intergenic | 0.286  | rs780484 rs7900   | 2 |
| AAG.CTT     | 6 | 36984349 | 36984369 | 7       | .                  | .        | intergenic | -0.101 | rs712598239       | 2 |
| AG.CT       | 6 | 37173933 | 37173943 | 5.5     | .                  | .        | intergenic | -0.03  | .                 | 2 |
| AAAC.GTTT   | 6 | 37328119 | 37328143 | 6.25    | .                  | .        | intergenic | -0.094 | rs791769972       | 2 |
| ACAT.ATGT   | 6 | 37365233 | 37365244 | 3       | .                  | .        | intergenic | .      | rs790415 rs7876   | 2 |
| AG.CT       | 6 | 37625256 | 37625266 | 5.5     | .                  | .        | intergenic | 0.032  | rs790856259       | 2 |
| AGG.CCT     | 6 | 37702857 | 37702870 | 4.66667 | .                  | .        | intergenic | 0.1    | .                 | 2 |
| AAAAT.ATTTT | 6 | 37904687 | 37904707 | 4.2     | ENSSSCT00000025063 | DPY19L3  | intron     | 0.108  | rs791759180       | 2 |
| AC.GT       | 6 | 37917202 | 37917226 | 12.5    | ENSSSCT00000025063 | DPY19L3  | intron     | -0.043 | rs788596417       | 2 |
| AC.GT       | 6 | 37928379 | 37928389 | 5.5     | .                  | .        | intergenic | 0.351  | rs791081247       | 2 |
| AAC.GTT     | 6 | 37981850 | 37981861 | 4       | .                  | .        | intergenic | .      | .                 | 2 |
| AAAC.GTTT   | 6 | 38120278 | 38120290 | 3.25    | ENSSSCT00000003160 | ANKRD27  | intron     | -0.064 | rs792893252       | 2 |
| AAAC.GTTT   | 6 | 38120278 | 38120290 | 3.25    | ENSSSCT00000027536 | SLC7A9   | intron     | -0.064 | rs792893252       | 2 |
| AC.GT       | 6 | 38422325 | 38422336 | 6       | .                  | .        | intergenic | .      | rs791224766       | 2 |
| AAAAC.GTTTT | 6 | 39122749 | 39122777 | 5.8     | .                  | .        | intergenic | 0.298  | rs7917506 rs7888  | 2 |
| AAAC.GTTT   | 6 | 39239710 | 39239722 | 3.25    | ENSSSCT00000021685 | U6       | promoter   | .      | rs786655930       | 2 |
| AAAAT.ATTTT | 6 | 39713751 | 39713773 | 4.6     | .                  | .        | intergenic | .      | rs786721621       | 2 |
| AT.AT       | 6 | 39721897 | 39721906 | 5       | .                  | .        | intergenic | .      | rs788329548       | 2 |
| AAAC.GTTT   | 6 | 40712254 | 40712266 | 3.25    | ENSSSCT00000003224 | TYROBP   | intron     | 0.369  | rs793549 rs7916   | 2 |
| AC.GT       | 6 | 40861068 | 40861080 | 6.5     | ENSSSCT00000003228 | WDR62    | intron     | 0.376  | .                 | 3 |
| AAAC.GTTT   | 6 | 40978346 | 40978362 | 4.25    | .                  | .        | intergenic | .      | rs79131190 rs7911 | 2 |
| AAAAT.ATTTT | 6 | 41035593 | 41035615 | 3.83333 | .                  | .        | intergenic | .      | rs792075771       | 2 |
| AC.GT       | 6 | 41053266 | 41053282 | 8.5     | ENSSSCT00000003238 | ZNF565   | intron     | .      | rs790278762       | 4 |
| AC.GT       | 6 | 41123837 | 41123849 | 6.5     | .                  | .        | intergenic | .      | rs786837587       | 2 |
| AAAG.CTTT   | 6 | 41133765 | 41133783 | 4.75    | .                  | .        | intergenic | .      | rs788159625       | 2 |
| AAAT.ATTT   | 6 | 41178688 | 41178711 | 6       | ENSSSCT00000003245 | ZNF567   | intron     | .      | .                 | 2 |
| AAC.GTT     | 6 | 41199282 | 41199301 | 6.66667 | ENSSSCT00000003241 | ZNF461   | intron     | 0.259  | rs7915081 rs7865  | 2 |
| AAAAT.ATTTT | 6 | 41291053 | 41291087 | 7       | .                  | .        | intergenic | .      | rs793711100       | 2 |
| AAT.ATT     | 6 | 41297238 | 41297255 | 6       | .                  | .        | intergenic | .      | rs794988 rs7890   | 2 |
| AAAAC.GTTTT | 6 | 41310825 | 41310852 | 4.66667 | .                  | .        | intergenic | 0.34   | rs79291429 rs7916 | 2 |
| AAAAC.GTTTT | 6 | 41336715 | 41336742 | 4.66667 | .                  | .        | intergenic | .      | rs787248368       | 2 |
| AAAC.GTTT   | 6 | 41711908 | 41711922 | 3.75    | ENSSSCT00000022792 | ZNF383   | 3'utr      | 0.294  | rs789944365       | 2 |
| AAAT.ATTT   | 6 | 41915086 | 41915106 | 5.25    | ENSSSCT00000003259 | .        | intron     | 0.1    | rs792679882       | 2 |
| AAAC.GTTT   | 6 | 42070101 | 42070115 | 3.75    | .                  | .        | intergenic | .      | rs792871378       | 2 |
| AG.CT       | 6 | 42941955 | 42941964 | 5       | ENSSSCT00000003285 | RYR1     | intron     | 0.522  | rs790396864       | 3 |
| AC.GT       | 6 | 43427740 | 43427750 | 5.5     | ENSSSCT00000003296 | .        | intron     | .      | rs792255101       | 2 |
| AC.GT       | 6 | 43489063 | 43489073 | 5.5     | .                  | .        | intergenic | .      | rs793303830       | 2 |
| AAAC.GTTT   | 6 | 43930510 | 43930528 | 4.75    | .                  | .        | intergenic | .      | rs79369937 rs7865 | 2 |
| AG.CT       | 6 | 44532553 | 44532569 | 8.5     | .                  | .        | intergenic | .      | rs788377739       | 2 |
| AC.GT       | 6 | 45609003 | 45609016 | 7       | ENSSSCT00000003371 | GSK3A    | intron     | 0.045  | .                 | 3 |
| AAT.ATT     | 6 | 46096117 | 46096136 | 6.66667 | .                  | .        | intergenic | .      | rs79103545 rs7921 | 2 |
| AAAC.GTTT   | 6 | 46301565 | 46301583 | 4.75    | ENSSSCT00000003398 | CADM4    | intron     | -0.185 | rs7918658 rs7908  | 2 |
| AC.GT       | 6 | 46457368 | 46457380 | 6.5     | .                  | .        | intergenic | -0.364 | rs79386882 rs7921 | 2 |
| AT.AT       | 6 | 46532109 | 46532118 | 5       | .                  | .        | intergenic | .      | .                 | 3 |
| AAAC.GTTT   | 6 | 47424545 | 47424572 | 7       | ENSSSCT00000003432 | SYMPK    | intron     | .      | rs79375746 rs7904 | 2 |
| AAC.GTT     | 6 | 47814455 | 47814466 | 4       | .                  | .        | intergenic | .      | rs790740903       | 2 |
| AAAC.GTTT   | 6 | 48085464 | 48085484 | 5.25    | .                  | .        | intergenic | 0.302  | rs79292502 rs7893 | 2 |
| AC.GT       | 6 | 48418445 | 48418472 | 14      | ENSSSCT00000003452 | .        | intron     | 0.359  | rs788199224       | 3 |
| AAAC.GTTT   | 6 | 48543802 | 48543823 | 5.5     | .                  | .        | intergenic | -0.072 | rs792263379       | 2 |
| AT.AT       | 6 | 48691019 | 48691029 | 5.5     | .                  | .        | intergenic | 0.095  | rs79326770 rs7885 | 2 |
| AAAAC.GTTTT | 6 | 48938652 | 48938672 | 4.2     | ENSSSCT00000022965 | GLTSCR1  | intron     | -0.127 | .                 | 2 |
| AAAAC.GTTTT | 6 | 48938652 | 48938672 | 4.2     | ENSSSCT00000024758 | GLTSCR1  | intron     | -0.127 | .                 | 2 |
| AT.AT       | 6 | 49214831 | 49214842 | 6       | ENSSSCT00000003469 | LIG1     | intron     | -0.593 | rs791240257       | 2 |
| AAT.ATT     | 6 | 49392294 | 49392306 | 4.33333 | ENSSSCT00000024369 | EMP3     | promoter   | 0.247  | rs790136589       | 2 |
| AC.GT       | 6 | 49881368 | 49881383 | 8       | ENSSSCT00000003479 | HSD17B14 | intron     | -0.375 | .                 | 2 |
| AC.GT       | 6 | 50057739 | 50057749 | 5.5     | .                  | .        | intergenic | -0.317 | .                 | 2 |
| AAAAT.ATTTT | 6 | 50910777 | 50910798 | 4.4     | ENSSSCT00000026507 | .        | intron     | -0.119 | rs787935971       | 2 |



|             |   |          |          |         |                    |         |            |        |             |        |   |
|-------------|---|----------|----------|---------|--------------------|---------|------------|--------|-------------|--------|---|
| AAAT.ATTT   | 6 | 51342053 | 51342074 | 5.5     | .                  | .       | intergenic | -0.037 | rs65339     | rs7901 | 2 |
| AAAAT.ATTTT | 6 | 51820343 | 51820362 | 4       | ENSSSCT00000003595 | SIGLEC5 | intron     | .      | rs789240568 | .      | 2 |
| AAAC.GTTT   | 6 | 52341065 | 52341086 | 5.5     | ENSSSCT00000024905 | ZNF615  | intron     | .      | rs168852    | rs7917 | 3 |
| AT.AT       | 6 | 53076559 | 53076568 | 5       | ENSSSCT00000003618 | CACNG6  | intron     | .      | rs786245327 | .      | 2 |
| AC.GT       | 6 | 53444891 | 53444908 | 9       | ENSSSCT00000025769 | TTYH1   | promoter   | -0.254 | rs792523984 | .      | 2 |
| AC.GT       | 6 | 53444891 | 53444908 | 9       | ENSSSCT00000003632 | TTYH1   | promoter   | -0.254 | rs792523984 | .      | 2 |
| AAC.GTT     | 6 | 54275357 | 54275382 | 8.66667 | ENSSSCT00000027366 | PTPRH   | 3'utr      | .      | rs152174    | rs7930 | 2 |
| AAC.GTT     | 6 | 54275357 | 54275382 | 8.66667 | ENSSSCT00000022455 | PTPRH   | 3'utr      | .      | rs152174    | rs7930 | 2 |
| AAG.CTT     | 6 | 56777388 | 56777400 | 4.33333 | .                  | .       | intergenic | .      | rs394179    | rs7877 | 2 |
| AAAAC.GTTTT | 6 | 56831282 | 56831313 | 6.4     | .                  | .       | intergenic | .      | rs154002    | rs7887 | 2 |
| AAAC.GTTT   | 6 | 57191369 | 57191384 | 4       | .                  | .       | intergenic | .      | rs123232    | rs7873 | 2 |
| AAAAC.GTTTT | 6 | 57217947 | 57217974 | 4.66667 | .                  | .       | intergenic | .      | rs792988934 | .      | 2 |
| AAAT.ATTT   | 6 | 57687847 | 57687868 | 5.5     | ENSSSCT00000004425 | RPS5    | intron     | .      | rs789579895 | .      | 2 |
| AAAAC.GTTTT | 6 | 58204361 | 58204387 | 4.5     | .                  | .       | intergenic | .      | .           | .      | 2 |
| AAG.CTT     | 6 | 58390673 | 58390686 | 4.66667 | ENSSSCT00000032230 | PRKCZ   | intron     | 0.589  | rs303139    | rs7892 | 2 |
| AG.CT       | 6 | 59038847 | 59038864 | 9       | .                  | .       | intergenic | .      | rs10098     | rs7921 | 2 |
| AAAC.GTTT   | 6 | 59527365 | 59527383 | 4.75    | .                  | .       | intergenic | -0.351 | rs792343292 | .      | 2 |
| AAAAC.GTTTT | 6 | 60378044 | 60378064 | 4.2     | .                  | .       | intergenic | -0.138 | rs786434609 | .      | 2 |
| AC.GT       | 6 | 60438922 | 60438946 | 12.5    | .                  | .       | intergenic | -0.438 | rs789225885 | .      | 2 |
| AGG.CCT     | 6 | 61217006 | 61217020 | 5       | .                  | .       | intergenic | .      | rs789853814 | .      | 2 |
| AAT.ATT     | 6 | 61757978 | 61757989 | 4       | ENSSSCT00000022446 | NPHP4   | promoter   | 0.146  | rs366787    | rs7877 | 2 |
| AAC.GTT     | 6 | 62175743 | 62175755 | 4.33333 | ENSSSCT00000003747 | ACOT7   | intron     | 2.137  | rs791830740 | .      | 2 |
| AC.GT       | 6 | 62585113 | 62585127 | 7.5     | .                  | .       | intergenic | -0.228 | rs209403    | rs7870 | 2 |
| AAC.GTT     | 6 | 62880331 | 62880347 | 5.66667 | .                  | .       | intergenic | 1.555  | rs750129    | rs7882 | 2 |
| AC.GT       | 6 | 63032121 | 63032134 | 7       | ENSSSCT00000003756 | PARK7   | intron     | -0.097 | rs792452892 | .      | 3 |
| AC.GT       | 6 | 63212581 | 63212595 | 7.5     | .                  | .       | intergenic | .      | rs792742785 | .      | 2 |
| AAAC.GTTT   | 6 | 63693957 | 63693983 | 6.75    | ENSSSCT00000003762 | CA6     | intron     | .      | rs787611498 | .      | 2 |
| AAG.CTT     | 6 | 63937289 | 63937303 | 5       | .                  | .       | intergenic | -0.138 | rs786589481 | .      | 2 |
| AG.CT       | 6 | 64237099 | 64237110 | 6       | .                  | .       | intergenic | 0.073  | rs399055    | rs7897 | 2 |
| AAAC.GTTT   | 6 | 64261409 | 64261429 | 5.25    | .                  | .       | intergenic | -0.364 | rs693783101 | .      | 3 |
| AATG.CATT   | 6 | 64268130 | 64268154 | 6.25    | .                  | .       | intergenic | .      | rs791020399 | .      | 2 |
| AAAAC.GTTTT | 6 | 64356773 | 64356799 | 5.4     | .                  | .       | intergenic | .      | rs790040390 | .      | 2 |
| AAAAG.CTTTT | 6 | 64666429 | 64666452 | 4.8     | ENSSSCT00000003777 | DFFA    | intron     | 0.028  | rs363189    | rs7874 | 2 |
| AAC.GTT     | 6 | 64676126 | 64676145 | 6.66667 | ENSSSCT00000003778 | PEX14   | intron     | .      | rs242410    | rs7879 | 2 |
| AAAC.GTTT   | 6 | 64680847 | 64680865 | 4.75    | ENSSSCT00000003778 | PEX14   | intron     | .      | rs792072305 | .      | 2 |
| AGAT.ATCT   | 6 | 65234004 | 65234022 | 4.75    | ENSSSCT00000003786 | FRAP1   | intron     | 0.252  | rs307507    | rs7920 | 2 |
| AAAC.GTTT   | 6 | 65302543 | 65302571 | 7.25    | ENSSSCT00000003786 | FRAP1   | intron     | -0.289 | rs705137    | rs7920 | 2 |
| AT.AT       | 6 | 65421909 | 65421920 | 6       | .                  | .       | intergenic | -0.166 | rs385311    | rs7916 | 2 |
| AC.GT       | 6 | 65668318 | 65668329 | 6       | ENSSSCT00000003795 | FBXO44  | intron     | 1.03   | rs788152514 | .      | 2 |
| AAAAC.GTTTT | 6 | 65720732 | 65720753 | 3.66667 | .                  | .       | intergenic | -0.184 | rs347842    | rs7885 | 2 |
| AAAT.ATTT   | 6 | 65797477 | 65797491 | 3.75    | ENSSSCT00000003807 | CLCN6   | intron     | .      | rs374469    | rs7871 | 2 |
| AGG.CCT     | 6 | 65915248 | 65915261 | 4.66667 | ENSSSCT00000003811 | PLOD1   | intron     | 0.593  | .           | .      | 2 |
| AAAAC.GTTTT | 6 | 67122315 | 67122338 | 4       | .                  | .       | intergenic | -0.435 | rs787235387 | .      | 2 |
| AAG.CCTT    | 6 | 67189830 | 67189846 | 4.25    | .                  | .       | intergenic | .      | rs791670240 | .      | 2 |
| AAAAG.CTTTT | 6 | 67205496 | 67205518 | 4.6     | .                  | .       | intergenic | 0.019  | rs104460    | rs7863 | 2 |
| AC.GT       | 6 | 67527601 | 67527613 | 6.5     | .                  | .       | intergenic | -0.043 | rs337990    | rs7931 | 2 |
| AC.GT       | 6 | 67720322 | 67720332 | 5.5     | .                  | .       | intergenic | 0.069  | rs788410417 | .      | 3 |
| AG.CT       | 6 | 67884087 | 67884103 | 8.5     | .                  | .       | intergenic | -0.113 | rs790737057 | .      | 2 |
| AGC.GCT     | 6 | 67961863 | 67961875 | 4.33333 | .                  | .       | intergenic | -0.144 | rs789737082 | .      | 2 |
| AAAC.GTTT   | 6 | 68161014 | 68161033 | 5       | .                  | .       | intergenic | -0.243 | rs793108665 | .      | 2 |
| AAAAT.ATTTT | 6 | 68481139 | 68481157 | 3.8     | .                  | .       | intergenic | -0.189 | rs369310    | rs7867 | 2 |
| AC.GT       | 6 | 68662022 | 68662035 | 7       | ENSSSCT00000003835 | KAZN    | intron     | -0.108 | rs793026612 | .      | 2 |
| AG.CT       | 6 | 68937185 | 68937195 | 5.5     | .                  | .       | intergenic | -0.089 | rs787741408 | .      | 3 |
| AC.GT       | 6 | 68947439 | 68947449 | 5.5     | ENSSSCT00000027709 | .       | intron     | 0.144  | rs791330954 | .      | 2 |
| AC.GT       | 6 | 68947439 | 68947449 | 5.5     | ENSSSCT00000003836 | .       | intron     | 0.144  | rs791330954 | .      | 2 |
| AAC.GTT     | 6 | 69235687 | 69235699 | 4.33333 | ENSSSCT00000003850 | DNAJC16 | intron     | 0.088  | rs791116949 | .      | 2 |
| AAAC.GTTT   | 6 | 69249126 | 69249140 | 3.75    | ENSSSCT00000003850 | DNAJC16 | intron     | 0.068  | rs354943    | rs7879 | 2 |
| AAAC.GTTT   | 6 | 69355022 | 69355048 | 6.75    | ENSSSCT00000003851 | FBLIM1  | intron     | 0.031  | .           | .      | 2 |
| AAC.GTT     | 6 | 69369825 | 69369840 | 5.33333 | ENSSSCT00000003851 | FBLIM1  | intron     | -0.134 | rs793253460 | .      | 2 |
| AAAC.GTTT   | 6 | 69649411 | 69649437 | 6.75    | .                  | .       | intergenic | -0.202 | rs792605751 | .      | 2 |
| AAAAC.GTTTT | 6 | 69745258 | 69745276 | 3.16667 | ENSSSCT00000032385 | FBXO42  | intron     | .      | rs786206765 | .      | 2 |
| AG.CT       | 6 | 70180744 | 70180758 | 7.5     | ENSSSCT00000033697 | PADI1   | intron     | -0.028 | rs327662    | rs7868 | 2 |
| AAAT.ATTT   | 6 | 70225076 | 70225090 | 3.75    | ENSSSCT00000003868 | PADI3   | intron     | -0.34  | rs793205161 | .      | 2 |
| AAC.GTT     | 6 | 70257380 | 70257402 | 7.66667 | .                  | .       | intergenic | .      | rs791376184 | .      | 2 |
| AAC.GTT     | 6 | 70436814 | 70436833 | 6.66667 | .                  | .       | intergenic | .      | rs792305502 | .      | 2 |
| AAAG.CTTT   | 6 | 70468951 | 70468969 | 4.75    | .                  | .       | intergenic | -0.142 | .           | .      | 2 |
| AAAG.CTTT   | 6 | 70562896 | 70562912 | 4.25    | .                  | .       | intergenic | -0.113 | rs788483300 | .      | 2 |
| ATC.GAT     | 6 | 70692860 | 70692876 | 5.66667 | .                  | .       | intergenic | .      | rs216867    | rs7864 | 2 |
| AC.GT       | 6 | 70795566 | 70795576 | 5.5     | .                  | .       | intergenic | -0.321 | rs355139    | rs7918 | 2 |
| ATCC.GGAT   | 6 | 71055621 | 71055636 | 4       | .                  | .       | intergenic | -0.005 | .           | .      | 2 |
| AC.GT       | 6 | 72517021 | 72517060 | 20      | .                  | .       | intergenic | -0.285 | rs399075    | rs7926 | 4 |
| AC.GT       | 6 | 72521624 | 72521635 | 6       | ENSSSCT00000003882 | PLA2G2A | promoter   | .      | rs760132    | rs7932 | 2 |
| AC.GT       | 6 | 72532189 | 72532203 | 7.5     | .                  | .       | intergenic | .      | rs787663704 | .      | 2 |
| AAAT.ATTT   | 6 | 72616127 | 72616162 | 9       | .                  | .       | intergenic | .      | .           | .      | 2 |
| AC.GT       | 6 | 72891534 | 72891544 | 5.5     | .                  | .       | intergenic | .      | .           | .      | 2 |
| AC.GT       | 6 | 72944253 | 72944262 | 5       | ENSSSCT00000027632 | MUL1    | intron     | .      | .           | .      | 2 |
| AT.AT       | 6 | 73363786 | 73363799 | 7       | .                  | .       | intergenic | 0.139  | rs790221559 | .      | 2 |
| AAAAT.ATTTT | 6 | 73459761 | 73459782 | 4.4     | .                  | .       | intergenic | 0.048  | rs791024635 | .      | 2 |
| AC.GT       | 6 | 73564810 | 73564820 | 5.5     | .                  | .       | intergenic | 0.34   | .           | .      | 2 |
| AAAT.ATTT   | 6 | 74315245 | 74315271 | 6.75    | .                  | .       | intergenic | .      | rs396046    | rs7908 | 2 |
| AC.GT       | 6 | 74745550 | 74745563 | 7       | .                  | .       | intergenic | 0.038  | rs375504    | rs7913 | 2 |
| AT.AT       | 6 | 74769648 | 74769658 | 5.5     | ENSSSCT00000003918 | EPHB2   | intron     | 0.14   | .           | .      | 2 |
| AAAC.GTTT   | 6 | 74951866 | 74951898 | 8.25    | ENSSSCT00000003922 | KDM1A   | intron     | 0.19   | .           | .      | 2 |
| AAAC.GTTT   | 6 | 74951866 | 74951898 | 8.25    | ENSSSCT00000003923 | KDM1A   | intron     | 0.19   | .           | .      | 2 |

|              |   |          |          |         |                    |          |            |        |               |   |
|--------------|---|----------|----------|---------|--------------------|----------|------------|--------|---------------|---|
| AT.AT        | 6 | 75181348 | 75181359 | 6       | .                  | .        | intergenic | 0.009  | 147140 rs7922 | 2 |
| AAAG.CTTT    | 6 | 75246258 | 75246283 | 6.5     | .                  | .        | intergenic | .      | 10664 rs7897  | 3 |
| AAAAC.GTTTT  | 6 | 76024485 | 76024504 | 4       | .                  | .        | intergenic | -0.066 | rs788885662   | 2 |
| AAC.GTT      | 6 | 76046290 | 76046303 | 4.66667 | .                  | .        | intergenic | 0.148  | 260569 rs7898 | 2 |
| AATC.GATT    | 6 | 76289081 | 76289109 | 7.25    | .                  | .        | intergenic | -0.216 | .             | 2 |
| AAAAC.GTTTT  | 6 | 76492714 | 76492748 | 7       | .                  | .        | intergenic | .      | rs788056522   | 2 |
| AT.AT        | 6 | 76852789 | 76852799 | 5.5     | .                  | .        | intergenic | .      | rs792296769   | 2 |
| AC.GT        | 6 | 77224880 | 77224895 | 8       | ENSSSCT00000024815 | CATSPER4 | intron     | 0.846  | .             | 2 |
| AAC.GTT      | 6 | 78641723 | 78641737 | 5       | ENSSSCT00000003975 | EYA3     | intron     | -0.02  | 166971 rs7902 | 2 |
| AAAT.ATTT    | 6 | 79121036 | 79121053 | 4.5     | .                  | .        | intergenic | 0.229  | rs786613414   | 2 |
| AAAC.GTTT    | 6 | 79363880 | 79363901 | 5.5     | ENSSSCT00000028011 | RCC1     | intron     | .      | .             | 2 |
| AAAC.GTTT    | 6 | 79405416 | 79405430 | 3.75    | ENSSSCT00000028704 | TRNAU1AF | intron     | .      | .             | 3 |
| AAAAC.GTTTT  | 6 | 79436575 | 79436604 | 6       | ENSSSCT00000027861 | TAF12    | intron     | 0.456  | .             | 2 |
| AAG.CTT      | 6 | 79566125 | 79566140 | 5.33333 | .                  | .        | intergenic | 0.284  | rs790470702   | 2 |
| AAAAT.ATTTT  | 6 | 79831189 | 79831212 | 4.8     | ENSSSCT00000003981 | EPB41    | intron     | 0.379  | rs789483116   | 2 |
| AAC.GTT      | 6 | 80050145 | 80050173 | 9.66667 | ENSSSCT00000003985 | PTPRU    | intron     | -0.084 | 325341 rs7896 | 2 |
| AG.CT        | 6 | 80189534 | 80189546 | 6.5     | .                  | .        | intergenic | 0.281  | rs793454489   | 2 |
| AG.CT        | 6 | 80244065 | 80244076 | 6       | .                  | .        | intergenic | .      | .             | 2 |
| AC.GT        | 6 | 80299679 | 80299691 | 6.5     | .                  | .        | intergenic | 0.042  | 202682 rs7906 | 2 |
| AG.CT        | 6 | 80654265 | 80654289 | 12.5    | .                  | .        | intergenic | -0.409 | .             | 3 |
| AC.GT        | 6 | 80803136 | 80803147 | 6       | .                  | .        | intergenic | -0.337 | rs790491132   | 2 |
| AAAC.GTTT    | 6 | 80851264 | 80851287 | 6       | .                  | .        | intergenic | .      | rs787901763   | 2 |
| ATC.GAT      | 6 | 80868176 | 80868207 | 10.6667 | .                  | .        | intergenic | -0.101 | 345427 rs7910 | 2 |
| ACAG.CTGT    | 6 | 81102839 | 81102856 | 4.5     | .                  | .        | intergenic | -0.167 | rs792804670   | 3 |
| AAAC.GTTT    | 6 | 81166754 | 81166776 | 5.75    | .                  | .        | intergenic | 0.115  | 380692 rs7895 | 2 |
| AT.AT        | 6 | 81410131 | 81410149 | 9.5     | .                  | .        | intergenic | .      | rs792834598   | 2 |
| AAAT.ATTT    | 6 | 81464364 | 81464377 | 3.5     | .                  | .        | intergenic | .      | .             | 2 |
| AG.CT        | 6 | 81765987 | 81765999 | 6.5     | ENSSSCT00000003994 | .        | intron     | .      | rs696422270   | 3 |
| AC.GT        | 6 | 81965995 | 81966007 | 6.5     | ENSSSCT00000003999 | .        | intron     | -0.001 | .             | 3 |
| AAC.GTT      | 6 | 82296547 | 82296570 | 8       | .                  | .        | intergenic | .      | rs787699537   | 2 |
| AG.CT        | 6 | 83398055 | 83398070 | 8       | .                  | .        | intergenic | 0.226  | .             | 4 |
| AAAC.GTTT    | 6 | 83914060 | 83914086 | 6.75    | ENSSSCT00000004018 | CSMD2    | intron     | -0.225 | rs789731403   | 2 |
| AG.CT        | 6 | 84041740 | 84041749 | 5       | ENSSSCT00000004018 | CSMD2    | intron     | -0.39  | .             | 4 |
| AAAC.GTTT    | 6 | 84218659 | 84218675 | 4.25    | .                  | .        | intergenic | -0.02  | rs787599556   | 2 |
| AG.CT        | 6 | 84229308 | 84229319 | 6       | .                  | .        | intergenic | 0.114  | rs786825269   | 2 |
| AG.CT        | 6 | 84235814 | 84235843 | 15      | .                  | .        | intergenic | -0.113 | .             | 2 |
| AAC.GTT      | 6 | 84520363 | 84520374 | 4       | .                  | .        | intergenic | 0.234  | .             | 2 |
| AT.AT        | 6 | 84590312 | 84590339 | 14      | .                  | .        | intergenic | -0.243 | 395408 rs7935 | 2 |
| AC.GT        | 6 | 84594503 | 84594517 | 7.5     | .                  | .        | intergenic | 0.259  | 368243 rs7898 | 2 |
| AAC.GTT      | 6 | 84595567 | 84595586 | 6.66667 | .                  | .        | intergenic | -0.048 | 716384 rs7903 | 2 |
| AC.GT        | 6 | 85243563 | 85243573 | 5.5     | ENSSSCT00000020107 | SNORD22  | promoter   | .      | rs790742995   | 2 |
| AAAT.ATTT    | 6 | 85566350 | 85566376 | 6.75    | ENSSSCT00000004032 | .        | intron     | .      | rs793150867   | 3 |
| AATG.CATT    | 6 | 85667662 | 85667687 | 6.5     | ENSSSCT00000004034 | TRAPPC3  | intron     | .      | rs789380643   | 2 |
| AATG.CATT    | 6 | 85790353 | 85790382 | 7.5     | .                  | .        | intergenic | .      | rs788592785   | 3 |
| AC.GT        | 6 | 85916422 | 85916432 | 5.5     | .                  | .        | intergenic | -0.094 | rs793504318   | 2 |
| AAC.GTT      | 6 | 86066088 | 86066099 | 4       | .                  | .        | intergenic | .      | rs709217950   | 3 |
| AG.CT        | 6 | 86482335 | 86482349 | 7.5     | .                  | .        | intergenic | .      | 305550 rs7864 | 2 |
| AAGG.CCTT    | 6 | 86493115 | 86493137 | 5.75    | .                  | .        | intergenic | -0.065 | .             | 4 |
| ACGC.GCGT    | 6 | 86880370 | 86880384 | 3.75    | .                  | .        | intergenic | 0.38   | rs789731793   | 2 |
| AAAC.GTTT    | 6 | 87705616 | 87705638 | 5.75    | .                  | .        | intergenic | -0.176 | 394141 rs7912 | 2 |
| AAAC.GTTT    | 6 | 87833173 | 87833205 | 8.25    | .                  | .        | intergenic | 0.096  | 711447 rs7063 | 2 |
| AAAAAC.GTTTT | 6 | 88033711 | 88033737 | 4.5     | ENSSSCT00000004050 | MACF1    | intron     | -0.305 | rs787717609   | 2 |
| AAAC.GTTT    | 6 | 88393728 | 88393739 | 3       | ENSSSCT00000004050 | MACF1    | intron     | -0.021 | rs789551531   | 2 |
| AG.CT        | 6 | 88534538 | 88534563 | 13      | ENSSSCT00000023745 | HEYL     | intron     | -0.1   | rs707868325   | 4 |
| AAC.GTT      | 6 | 88578863 | 88578884 | 7.33333 | ENSSSCT00000004058 | NT5C1A   | intron     | .      | rs788938716   | 2 |
| AAGG.CCTT    | 6 | 88733652 | 88733684 | 8.25    | ENSSSCT00000004061 | .        | intron     | .      | rs789241405   | 2 |
| AAGG.CCTT    | 6 | 88733652 | 88733684 | 8.25    | ENSSSCT00000004052 | .        | intron     | .      | rs789241405   | 2 |
| AC.GT        | 6 | 88776350 | 88776359 | 5       | .                  | .        | intergenic | 0.2    | .             | 2 |
| AAAT.ATTT    | 6 | 88861388 | 88861413 | 6.5     | .                  | .        | intergenic | .      | .             | 2 |
| AAAC.GTTT    | 6 | 88885661 | 88885683 | 5.75    | .                  | .        | intergenic | 0.042  | rs787519975   | 2 |
| AAT.ATT      | 6 | 88992216 | 88992238 | 7.66667 | .                  | .        | intergenic | .      | rs786985793   | 2 |
| AT.AT        | 6 | 89188918 | 89188928 | 5.5     | ENSSSCT00000004066 | RLF      | intron     | 0.405  | rs789281296   | 2 |
| AAG.CTT      | 6 | 89248346 | 89248359 | 4.66667 | .                  | .        | intergenic | .      | .             | 2 |
| AAGG.CCTT    | 6 | 89253488 | 89253499 | 3       | .                  | .        | intergenic | .      | rs788450015   | 2 |
| AC.GT        | 6 | 89669154 | 89669164 | 5.5     | .                  | .        | intergenic | .      | rs792851819   | 2 |
| AT.AT        | 6 | 89714997 | 89715008 | 6       | ENSSSCT00000032434 | LDLRAD4  | intron     | 0.164  | 272173 rs7886 | 2 |
| ACAT.ATGT    | 6 | 89946646 | 89946665 | 5       | ENSSSCT00000004070 | CEP192   | intron     | 0.042  | 227349 rs7922 | 2 |
| ACAG.CTGT    | 6 | 90053044 | 90053065 | 5.5     | .                  | .        | intergenic | .      | rs791469414   | 2 |
| AAAC.GTTT    | 6 | 90169848 | 90169862 | 3.75    | ENSSSCT00000025318 | PTPN2    | intron     | .      | rs792229356   | 2 |
| AAT.ATT      | 6 | 90336968 | 90336987 | 6.66667 | ENSSSCT00000031445 | CEP76    | 3'utr      | 0.324  | 138459 rs7916 | 2 |
| AC.GT        | 6 | 90369620 | 90369632 | 6.5     | ENSSSCT00000028047 | .        | intron     | .      | .             | 3 |
| AAC.GTT      | 6 | 90449308 | 90449324 | 5.66667 | .                  | .        | intergenic | -0.3   | 307338 rs7888 | 2 |
| AAAT.ATTT    | 6 | 90462578 | 90462595 | 4.5     | .                  | .        | intergenic | .      | rs790882559   | 2 |
| AC.GT        | 6 | 90750532 | 90750546 | 7.5     | ENSSSCT00000022557 | IMPA2    | intron     | .      | .             | 2 |
| ACC.GGT      | 6 | 90917060 | 90917071 | 4       | .                  | .        | intergenic | -0.188 | rs789234056   | 2 |
| AAAT.ATTT    | 6 | 90923932 | 90923943 | 3       | .                  | .        | intergenic | .      | rs793781486   | 2 |
| AAAAC.GTTTT  | 6 | 91115487 | 91115507 | 4.2     | .                  | .        | intergenic | -0.099 | rs789889511   | 2 |
| AAAC.GTTT    | 6 | 91123398 | 91123436 | 9.75    | .                  | .        | intergenic | 0.21   | 354110 rs7899 | 2 |
| AGC.GCT      | 6 | 91161535 | 91161555 | 7       | .                  | .        | intergenic | 0.056  | .             | 2 |
| AT.AT        | 6 | 91300157 | 91300171 | 7.5     | .                  | .        | intergenic | .      | rs793292516   | 2 |
| AC.GT        | 6 | 91348549 | 91348565 | 8.5     | .                  | .        | intergenic | -0.199 | rs792634739   | 2 |
| AT.AT        | 6 | 91409909 | 91409925 | 8.5     | .                  | .        | intergenic | .      | rs786349076   | 2 |
| AG.CT        | 6 | 91483293 | 91483307 | 7.5     | .                  | .        | intergenic | -0.047 | rs789877075   | 2 |
| AT.AT        | 6 | 91510196 | 91510213 | 9       | .                  | .        | intergenic | .      | .             | 2 |

|               |   |           |           |         |                    |         |            |        |                    |   |
|---------------|---|-----------|-----------|---------|--------------------|---------|------------|--------|--------------------|---|
| ATGC.GCAT     | 6 | 91824929  | 91824944  | 4       | ENSSSCT00000004076 | .       | intron     | .      | .                  | 2 |
| AAAC.GTTT     | 6 | 91866495  | 91866526  | 8       | ENSSSCT00000004076 | .       | intron     | .      | rs790357696        | 2 |
| AAAC.GTTT     | 6 | 91866495  | 91866526  | 8       | ENSSSCT00000004078 | RALBP1  | intron     | .      | rs790357696        | 2 |
| AT.AT         | 6 | 92105019  | 92105029  | 5.5     | ENSSSCT00000004080 | ANKRD12 | intron     | 0.153  | rs786819720        | 4 |
| AAAC.GTTT     | 6 | 92346239  | 92346261  | 5.75    | .                  | .       | intergenic | -0.294 | rs789902594        | 2 |
| AC.GT         | 6 | 92409475  | 92409486  | 6       | ENSSSCT00000024838 | SOGA2   | intron     | 0.039  | rs793024293        | 2 |
| AC.GT         | 6 | 92409475  | 92409486  | 6       | ENSSSCT00000004082 | SOGA2   | intron     | 0.039  | rs793024293        | 2 |
| AC.GT         | 6 | 92545326  | 92545347  | 11      | ENSSSCT00000032539 | PTPRM   | intron     | .      | rs793680660        | 2 |
| AC.GT         | 6 | 92647994  | 92648004  | 5.5     | .                  | .       | intergenic | -0.236 | rs787868324        | 2 |
| AATT.AATT     | 6 | 92726334  | 92726351  | 4.5     | .                  | .       | intergenic | 0.248  | rs792453311        | 2 |
| AC.GT         | 6 | 92798062  | 92798074  | 6.5     | .                  | .       | intergenic | -0.321 | rs793607780        | 2 |
| AAAG.CTTT     | 6 | 92936658  | 92936671  | 3.5     | .                  | .       | intergenic | .      | rs789232014        | 2 |
| AAGG.CCTT     | 6 | 93048165  | 93048184  | 5       | .                  | .       | intergenic | -0.216 | rs790632050        | 2 |
| AAT.ATT       | 6 | 93156765  | 93156782  | 6       | .                  | .       | intergenic | -0.048 | .                  | 2 |
| AAG.CTT       | 6 | 93233128  | 93233159  | 10.6667 | .                  | .       | intergenic | 0.114  | rs791217831        | 2 |
| AT.AT         | 6 | 93338712  | 93338722  | 5.5     | .                  | .       | intergenic | .      | rs793836556        | 3 |
| AGAGC.GCTCT   | 6 | 93442079  | 93442098  | 4       | .                  | .       | intergenic | .      | rs792437 rs7862    | 2 |
| AC.GT         | 6 | 93686710  | 93686722  | 6.5     | ENSSSCT00000004084 | .       | intron     | 0.161  | rs787325777        | 2 |
| AC.GT         | 6 | 93770304  | 93770327  | 12      | ENSSSCT00000004084 | .       | intron     | .      | rs788671695        | 4 |
| AAAC.GTTT     | 6 | 93798120  | 93798140  | 5.25    | ENSSSCT00000004084 | .       | intron     | 0.24   | rs789337089        | 2 |
| AAAG.CTTT     | 6 | 93811075  | 93811120  | 11.5    | ENSSSCT00000004084 | .       | intron     | -0.018 | rs786648078        | 2 |
| AT.AT         | 6 | 93960710  | 93960726  | 8.5     | .                  | .       | intergenic | 0.128  | rs793283749        | 2 |
| AAAAG.CTTTT   | 6 | 93961047  | 93961070  | 4.8     | .                  | .       | intergenic | -0.066 | rs791636298        | 2 |
| AC.GT         | 6 | 94215508  | 94215530  | 11.5    | .                  | .       | intergenic | .      | rs79603 rs7931     | 2 |
| AG.CT         | 6 | 94242037  | 94242047  | 5.5     | .                  | .       | intergenic | .      | rs792396324        | 2 |
| AAAC.GTTT     | 6 | 94259653  | 94259687  | 8.75    | .                  | .       | intergenic | .      | rs792230191        | 2 |
| AAAT.ATTT     | 6 | 94752787  | 94752816  | 7.5     | ENSSSCT00000004085 | EPB41L3 | intron     | 0.106  | rs79235586 rs7923  | 2 |
| ACAG.CTGT     | 6 | 95003862  | 95003875  | 3.5     | .                  | .       | intergenic | .      | .                  | 2 |
| AAAC.GTTT     | 6 | 95027629  | 95027643  | 3.75    | .                  | .       | intergenic | 0.082  | rs786343557        | 4 |
| AC.GT         | 6 | 95069327  | 95069341  | 7.5     | .                  | .       | intergenic | 0.123  | rs793585110        | 2 |
| AT.AT         | 6 | 95280953  | 95280966  | 7       | .                  | .       | intergenic | -0.038 | rs698121647        | 2 |
| AAAC.GTTT     | 6 | 95330656  | 95330676  | 5.25    | .                  | .       | intergenic | -0.049 | rs791980852        | 2 |
| AAC.GTT       | 6 | 95548825  | 95548849  | 8.33333 | .                  | .       | intergenic | .      | rs791739252        | 2 |
| AG.CT         | 6 | 95581817  | 95581827  | 5.5     | .                  | .       | intergenic | 0.395  | rs787984489        | 4 |
| AAAT.ATTT     | 6 | 95590815  | 95590829  | 3.75    | .                  | .       | intergenic | 0.374  | rs791136620        | 2 |
| AAAC.GTTT     | 6 | 95703659  | 95703681  | 5.75    | .                  | .       | intergenic | 0.169  | rs790017056        | 2 |
| AG.CT         | 6 | 95726530  | 95726541  | 6       | .                  | .       | intergenic | -0.095 | rs793608192        | 2 |
| AAT.ATT       | 6 | 95764845  | 95764861  | 5.66667 | .                  | .       | intergenic | 0.018  | rs792608869        | 2 |
| AC.GT         | 6 | 95770294  | 95770314  | 10.5    | .                  | .       | intergenic | -0.043 | rs7914700 rs7884   | 2 |
| AAAAC.GTTTT   | 6 | 95949308  | 95949330  | 3.83333 | ENSSSCT00000026090 | .       | intron     | .      | rs790992061        | 2 |
| AC.GT         | 6 | 95981855  | 95981865  | 5.5     | .                  | .       | intergenic | -0.046 | .                  | 4 |
| AAAT.ATTT     | 6 | 96114852  | 96114872  | 5.25    | .                  | .       | intergenic | -0.05  | rs788158908        | 2 |
| AC.GT         | 6 | 96135670  | 96135682  | 6.5     | .                  | .       | intergenic | 0.023  | rs790830263        | 2 |
| AAAAG.CTTTT   | 6 | 96205207  | 96205229  | 4.6     | ENSSSCT00000004088 | DLGAP1  | intron     | -0.004 | rs790133453 rs7901 | 2 |
| AAAT.ATTT     | 6 | 96333672  | 96333695  | 6       | .                  | .       | intergenic | 0.115  | rs790903171        | 2 |
| AAAC.GTTT     | 6 | 96335091  | 96335103  | 3.25    | .                  | .       | intergenic | 0.036  | .                  | 2 |
| AAAG.CTTT     | 6 | 96369918  | 96369941  | 6       | .                  | .       | intergenic | .      | rs790012071        | 2 |
| AAAT.ATTT     | 6 | 96763386  | 96763404  | 4.75    | ENSSSCT00000004093 | EMILIN2 | intron     | 0.02   | rs790804525        | 2 |
| AAAAC.GTTTT   | 6 | 96951014  | 96951046  | 6.6     | .                  | .       | intergenic | 0.114  | rs787885696        | 2 |
| AG.CT         | 6 | 97273108  | 97273120  | 6.5     | .                  | .       | intergenic | .      | rs792814004        | 3 |
| AAAC.GTTT     | 6 | 97279322  | 97279353  | 8       | .                  | .       | intergenic | 0.124  | rs790713716        | 3 |
| AT.AT         | 6 | 97456786  | 97456796  | 5.5     | .                  | .       | intergenic | 0.169  | rs789605420        | 2 |
| AAAG.CTTT     | 6 | 97459231  | 97459249  | 4.75    | .                  | .       | intergenic | 0.039  | rs793229611        | 2 |
| AT.AT         | 6 | 97587678  | 97587690  | 6.5     | .                  | .       | intergenic | 0.392  | rs7900114893       | 2 |
| AAAT.ATTT     | 6 | 97624836  | 97624853  | 4.5     | .                  | .       | intergenic | .      | rs7918159270       | 2 |
| AT.AT         | 6 | 97917004  | 97917019  | 8       | .                  | .       | intergenic | 0.036  | rs787312908        | 3 |
| AG.CT         | 6 | 97963601  | 97963623  | 11.5    | .                  | .       | intergenic | 0.045  | rs7908328006       | 2 |
| AT.AT         | 6 | 98146606  | 98146620  | 7.5     | .                  | .       | intergenic | .      | rs792577476        | 2 |
| ATCAT.ATGAT   | 6 | 98207450  | 98207478  | 4.83333 | .                  | .       | intergenic | .      | .                  | 2 |
| AG.CT         | 6 | 98216554  | 98216570  | 8.5     | .                  | .       | intergenic | .      | rs7869333408       | 5 |
| AG.CT         | 6 | 98407644  | 98407681  | 19      | .                  | .       | intergenic | 0.182  | rs790305658        | 2 |
| AAAC.GTTT     | 6 | 98513714  | 98513736  | 5.75    | .                  | .       | intergenic | 0.06   | rs791431644        | 2 |
| AAAT.ATTT     | 6 | 98691072  | 98691084  | 3.25    | .                  | .       | intergenic | 0.085  | .                  | 3 |
| AAC.GTT       | 6 | 98729480  | 98729492  | 4.33333 | ENSSSCT00000029907 | ROCK1   | intron     | .      | rs788861348        | 3 |
| AAC.GTT       | 6 | 98729480  | 98729492  | 4.33333 | ENSSSCT00000026467 | ROCK1   | intron     | .      | rs788861348        | 3 |
| AG.CT         | 6 | 99118258  | 99118276  | 9.5     | ENSSSCT00000004098 | GREB1L  | intron     | 1.322  | rs793214520        | 2 |
| AC.GT         | 6 | 99370829  | 99370838  | 5       | ENSSSCT00000031178 | ABHD3   | intron     | 0.12   | rs791097121        | 2 |
| AAAT.ATTT     | 6 | 99392333  | 99392348  | 4       | ENSSSCT00000031178 | ABHD3   | intron     | -0.087 | rs7915340113       | 2 |
| AC.GT         | 6 | 99713900  | 99713914  | 7.5     | .                  | .       | intergenic | -0.025 | rs7930353298       | 2 |
| AC.GT         | 6 | 99753223  | 99753237  | 7.5     | .                  | .       | intergenic | 0.151  | rs790996573        | 3 |
| AGG.CCT       | 6 | 99841236  | 99841253  | 6       | .                  | .       | intergenic | -0.059 | rs793423560        | 2 |
| AAAAC.GTTTT   | 6 | 99892160  | 99892185  | 5.2     | .                  | .       | intergenic | 0.185  | rs7892278432       | 2 |
| AAAC.GTTT     | 6 | 99907720  | 99907738  | 4.75    | .                  | .       | intergenic | .      | rs7901320684       | 2 |
| AAAC.GTTT     | 6 | 100179386 | 100179397 | 3       | .                  | .       | intergenic | 0.269  | .                  | 2 |
| AAG.CTT       | 6 | 100330159 | 100330176 | 6       | .                  | .       | intergenic | .      | rs7897349485       | 3 |
| AAAAC.GTTTT   | 6 | 100572350 | 100572379 | 6       | .                  | .       | intergenic | 0.268  | rs7894389515       | 2 |
| AAAAC.GTTTT   | 6 | 101065449 | 101065476 | 5.6     | ENSSSCT00000004107 | ANKRD29 | intron     | .      | rs793879093        | 2 |
| AAC.GTT       | 6 | 101276400 | 101276414 | 5       | ENSSSCT00000027989 | LAMA5   | intron     | 0.883  | rs787272636        | 2 |
| AATG.CATT     | 6 | 101311754 | 101311771 | 4.5     | ENSSSCT00000027989 | LAMA5   | intron     | -0.047 | rs792169969        | 2 |
| AAAG.CTTT     | 6 | 101474831 | 101474845 | 3.75    | ENSSSCT00000004108 | LAMA3   | intron     | 0.296  | rs787087609        | 2 |
| AAAG.CTTT     | 6 | 101474831 | 101474845 | 3.75    | ENSSSCT00000024191 | LAMA3   | intron     | 0.296  | rs787087609        | 2 |
| AAAAAT.ATTTTT | 6 | 101761908 | 101761935 | 4.66667 | ENSSSCT00000004111 | OSBPL1A | intron     | .      | rs787961323        | 2 |
| AC.GT         | 6 | 102448839 | 102448870 | 16      | .                  | .       | intergenic | -0.247 | rs790852455        | 2 |
| AAC.GTT       | 6 | 102688800 | 102688813 | 4.66667 | .                  | .       | intergenic | 0.181  | rs792907075        | 2 |

|             |   |           |           |         |                     |        |            |        |               |   |
|-------------|---|-----------|-----------|---------|---------------------|--------|------------|--------|---------------|---|
| AAAC.GTTT   | 6 | 102803028 | 102803048 | 5.25    | .                   | .      | intergenic | -0.203 | .             | 2 |
| AG.CT       | 6 | 103107758 | 103107767 | 5       | .                   | .      | intergenic | .      | rs789241293   | 2 |
| AGAT.ATCT   | 6 | 103142644 | 103142680 | 9.25    | .                   | .      | intergenic | 0.07   | rs793662530   | 2 |
| ACAT.ATGT   | 6 | 103351557 | 103351576 | 5       | .                   | .      | intergenic | -0.035 | rs789593031   | 2 |
| AAAC.GTTT   | 6 | 103581198 | 103581218 | 5.25    | .                   | .      | intergenic | 0.435  | rs793574140   | 2 |
| AAAG.CTTT   | 6 | 103865559 | 103865571 | 3.25    | ENSSSCT00000004118  | TAF4B  | intron     | .      | rs786345540   | 2 |
| AAG.CTT     | 6 | 104041430 | 104041449 | 6.66667 | ENSSSCT000000031750 | KCTD1  | intron     | 0.196  | rs788335004   | 2 |
| AAG.CTT     | 6 | 104041430 | 104041449 | 6.66667 | ENSSSCT00000004119  | KCTD1  | intron     | 0.196  | rs788335004   | 2 |
| AAATG.CATTT | 6 | 104060176 | 104060204 | 5.8     | ENSSSCT000000031750 | KCTD1  | intron     | 0.041  | rs791388784   | 2 |
| ACAG.CTGT   | 6 | 104085672 | 104085699 | 7       | ENSSSCT000000031750 | KCTD1  | intron     | 0.16   | 201709 rs7895 | 2 |
| AC.GT       | 6 | 104145577 | 104145587 | 5.5     | .                   | .      | intergenic | 0.279  | .             | 3 |
| AAT.ATT     | 6 | 104176575 | 104176588 | 4.66667 | .                   | .      | intergenic | -0.128 | rs792411908   | 2 |
| AG.CT       | 6 | 104229534 | 104229565 | 16      | .                   | .      | intergenic | -0.026 | rs790211676   | 2 |
| AAC.GTT     | 6 | 104286693 | 104286709 | 5.66667 | .                   | .      | intergenic | 0.17   | rs789304561   | 2 |
| ATC.GAT     | 6 | 104442774 | 104442789 | 5.33333 | .                   | .      | intergenic | -0.008 | 316728 rs7902 | 4 |
| AAAC.GTTT   | 6 | 104573351 | 104573375 | 6.25    | .                   | .      | intergenic | .      | 367276 rs7925 | 2 |
| AAC.GTT     | 6 | 104655294 | 104655310 | 5.66667 | .                   | .      | intergenic | 0.099  | .             | 3 |
| AAAC.GTTT   | 6 | 104784712 | 104784737 | 6.5     | .                   | .      | intergenic | 0.116  | rs789714791   | 2 |
| AC.GT       | 6 | 104914361 | 104914371 | 5.5     | .                   | .      | intergenic | -0.363 | .             | 2 |
| AC.GT       | 6 | 105066561 | 105066571 | 5.5     | .                   | .      | intergenic | 0.397  | rs787634463   | 2 |
| AAAAC.GTTTT | 6 | 105078096 | 105078111 | 3.2     | .                   | .      | intergenic | -0.008 | rs793345289   | 2 |
| AT.AT       | 6 | 105107875 | 105107885 | 5.5     | .                   | .      | intergenic | -0.041 | rs786325269   | 2 |
| AAC.GTT     | 6 | 105395736 | 105395748 | 4.33333 | .                   | .      | intergenic | 0.098  | rs786608093   | 2 |
| AAAAT.ATTTT | 6 | 105549021 | 105549035 | 3       | .                   | .      | intergenic | -0.128 | rs790747339   | 2 |
| AT.AT       | 6 | 105640998 | 105641008 | 5.5     | .                   | .      | intergenic | 0.301  | rs787319550   | 3 |
| AAAC.GTTT   | 6 | 105872967 | 105872989 | 5.75    | .                   | .      | intergenic | -0.061 | rs692897045   | 2 |
| AAAG.CTTT   | 6 | 105946705 | 105946725 | 5.25    | .                   | .      | intergenic | .      | rs789392710   | 2 |
| AAG.CTT     | 6 | 105960121 | 105960151 | 10.3333 | .                   | .      | intergenic | -0.243 | rs789439090   | 2 |
| AAAT.ATTT   | 6 | 106104799 | 106104823 | 6.25    | .                   | .      | intergenic | -0.03  | rs792008058   | 2 |
| AAAAC.GTTTT | 6 | 106290475 | 106290497 | 3.83333 | .                   | .      | intergenic | 0.019  | rs790070338   | 2 |
| AAAC.GTTT   | 6 | 106588586 | 106588630 | 11.25   | .                   | .      | intergenic | .      | 190448 rs7922 | 2 |
| AAAAC.GTTTT | 6 | 107171014 | 107171038 | 4.16667 | .                   | .      | intergenic | -0.195 | rs791817575   | 2 |
| AT.AT       | 6 | 107252641 | 107252653 | 6.5     | .                   | .      | intergenic | 0.007  | rs789504308   | 2 |
| AAAG.CTTT   | 6 | 107272613 | 107272638 | 6.5     | .                   | .      | intergenic | -0.043 | rs710553298   | 2 |
| AT.AT       | 6 | 107718266 | 107718285 | 10      | .                   | .      | intergenic | .      | rs789990337   | 2 |
| AAAC.GTTT   | 6 | 107789642 | 107789660 | 4.75    | .                   | .      | intergenic | .      | 373796 rs7868 | 2 |
| AAAAT.ATTTT | 6 | 107813933 | 107813950 | 3       | .                   | .      | intergenic | 0.165  | rs790107538   | 2 |
| AG.CT       | 6 | 107879950 | 107879960 | 5.5     | ENSSSCT00000022644  | DSG1   | intron     | 0.166  | rs792627134   | 2 |
| ATC.GAT     | 6 | 108069907 | 108069918 | 4       | ENSSSCT00000025628  | DSG2   | intron     | .      | rs788631469   | 2 |
| ATC.GAT     | 6 | 108069907 | 108069918 | 4       | ENSSSCT00000029235  | DSG2   | intron     | .      | rs788631469   | 2 |
| AAAG.CTTT   | 6 | 108108674 | 108108696 | 5.75    | .                   | .      | intergenic | 0.119  | .             | 2 |
| AAG.CTT     | 6 | 108329397 | 108329416 | 6.66667 | .                   | .      | intergenic | .      | rs791186539   | 2 |
| AAC.GTT     | 6 | 108677144 | 108677157 | 4.66667 | .                   | .      | intergenic | 0.457  | rs787290761   | 2 |
| AAAC.GTTT   | 6 | 108719840 | 108719864 | 6.25    | ENSSSCT00000004132  | MEP1B  | intron     | .      | rs789927364   | 2 |
| AC.GT       | 6 | 108780110 | 108780119 | 5       | ENSSSCT00000004131  | GAREM  | intron     | .      | rs792259027   | 3 |
| AC.GT       | 6 | 109271928 | 109271946 | 9.5     | ENSSSCT00000004133  | KLHL14 | intron     | 0.019  | .             | 3 |
| AG.CT       | 6 | 109313877 | 109313902 | 13      | ENSSSCT00000004133  | KLHL14 | intron     | 0.227  | rs786489059   | 4 |
| AC.GT       | 6 | 109378643 | 109378653 | 5.5     | .                   | .      | intergenic | 0.114  | rs792413376   | 2 |
| AC.GT       | 6 | 109404717 | 109404755 | 19.5    | .                   | .      | intergenic | 0.093  | 762266 rs7862 | 2 |
| AAAG.CTTT   | 6 | 109414711 | 109414728 | 4.5     | .                   | .      | intergenic | 0.037  | 799994 rs7915 | 2 |
| AT.AT       | 6 | 109490855 | 109490866 | 6       | .                   | .      | intergenic | 0.193  | rs788600737   | 2 |
| AG.CT       | 6 | 109869261 | 109869271 | 5.5     | .                   | .      | intergenic | 0.324  | rs787489345   | 2 |
| AAC.GTT     | 6 | 109891020 | 109891039 | 6.66667 | .                   | .      | intergenic | .      | rs791529422   | 2 |
| AATT.AATT   | 6 | 109969561 | 109969574 | 3.5     | .                   | .      | intergenic | .      | .             | 2 |
| AG.CT       | 6 | 110069313 | 110069324 | 6       | ENSSSCT00000004137  | NOL4   | intron     | .      | .             | 2 |
| AAAAG.CTTTT | 6 | 110161544 | 110161559 | 3.2     | ENSSSCT00000004137  | NOL4   | intron     | .      | 343877 rs7917 | 2 |
| AAAT.ATTT   | 6 | 110265457 | 110265471 | 3.75    | .                   | .      | intergenic | .      | rs787482435   | 2 |
| AC.GT       | 6 | 110379116 | 110379129 | 7       | .                   | .      | intergenic | 0.068  | 387969 rs7929 | 2 |
| AT.AT       | 6 | 110429503 | 110429526 | 12      | .                   | .      | intergenic | .      | .             | 2 |
| AGAAT.ATTCT | 6 | 110610900 | 110610926 | 4.5     | .                   | .      | intergenic | 0.078  | rs793744491   | 2 |
| AAAC.GTTT   | 6 | 110625449 | 110625468 | 5       | .                   | .      | intergenic | 0.1    | rs786973913   | 2 |
| AATG.CATT   | 6 | 110739891 | 110739912 | 5.5     | ENSSSCT00000024859  | .      | intron     | 0.073  | rs793687712   | 2 |
| AAT.ATT     | 6 | 110875153 | 110875164 | 4       | .                   | .      | intergenic | 0.156  | 333615 rs7896 | 2 |
| AT.AT       | 6 | 111343381 | 111343400 | 10      | ENSSSCT00000004139  | MAPRE2 | intron     | 0.017  | rs789311392   | 2 |
| AAAAC.GTTTT | 6 | 111373463 | 111373484 | 4.4     | ENSSSCT00000004139  | MAPRE2 | intron     | -0.131 | rs791926970   | 2 |
| AAAC.GTTT   | 6 | 111669339 | 111669358 | 5       | .                   | .      | intergenic | -0.011 | rs788097862   | 2 |
| AC.GT       | 6 | 111834913 | 111834928 | 8       | ENSSSCT00000032735  | GALNT1 | intron     | .      | 310678 rs7878 | 2 |
| AAC.GTT     | 6 | 111926286 | 111926303 | 6       | ENSSSCT00000004144  | GALNT1 | intron     | 0.192  | rs788432256   | 2 |
| AAC.GTT     | 6 | 111926286 | 111926303 | 6       | ENSSSCT00000032735  | GALNT1 | intron     | 0.192  | rs788432256   | 2 |
| AG.CT       | 6 | 112381167 | 112381178 | 6       | .                   | .      | intergenic | .      | .             | 3 |
| AC.GT       | 6 | 112672333 | 112672347 | 7.5     | .                   | .      | intergenic | .      | 275972 rs7876 | 2 |
| AAG.CTT     | 6 | 112680039 | 112680063 | 8.33333 | .                   | .      | intergenic | .      | .             | 2 |
| AAC.GTT     | 6 | 112914578 | 112914591 | 4.66667 | ENSSSCT00000025775  | FHOD3  | intron     | -0.083 | rs791525234   | 2 |
| AAC.GTT     | 6 | 112914578 | 112914591 | 4.66667 | ENSSSCT00000023176  | FHOD3  | intron     | -0.083 | rs791525234   | 2 |
| AAC.GTT     | 6 | 112914578 | 112914591 | 4.66667 | ENSSSCT00000029253  | FHOD3  | intron     | -0.083 | rs791525234   | 2 |
| AAAC.GTTT   | 6 | 112999990 | 113000008 | 4.75    | ENSSSCT00000025775  | FHOD3  | intron     | 0.288  | 242740 rs7903 | 2 |
| AAAC.GTTT   | 6 | 112999990 | 113000008 | 4.75    | ENSSSCT00000023176  | FHOD3  | intron     | 0.288  | 242740 rs7903 | 2 |
| AAAC.GTTT   | 6 | 112999990 | 113000008 | 4.75    | ENSSSCT00000029253  | FHOD3  | intron     | 0.288  | 242740 rs7903 | 2 |
| AAAAC.GTTTT | 6 | 113099188 | 113099210 | 3.83333 | ENSSSCT00000004148  | .      | intron     | .      | 191830 rs7863 | 3 |
| AAAAC.GTTTT | 6 | 113099188 | 113099210 | 3.83333 | ENSSSCT00000029253  | FHOD3  | intron     | .      | 191830 rs7863 | 3 |
| AAAAC.GTTTT | 6 | 113099188 | 113099210 | 3.83333 | ENSSSCT00000025775  | FHOD3  | intron     | .      | 191830 rs7863 | 3 |
| AAAAC.GTTTT | 6 | 113099188 | 113099210 | 3.83333 | ENSSSCT00000023176  | FHOD3  | intron     | .      | 191830 rs7863 | 3 |
| AT.AT       | 6 | 113467378 | 113467393 | 8       | .                   | .      | intergenic | .      | rs793355675   | 2 |
| AAAC.GTTT   | 6 | 113827528 | 113827543 | 4       | .                   | .      | intergenic | 0.053  | 378239 rs7923 | 2 |

|             |   |           |           |         |                    |        |            |        |             |        |   |
|-------------|---|-----------|-----------|---------|--------------------|--------|------------|--------|-------------|--------|---|
| AAG.CTT     | 6 | 114137794 | 114137817 | 8       | .                  | .      | intergenic | -0.186 | .           | .      | 2 |
| AC.GT       | 6 | 114172244 | 114172262 | 9.5     | .                  | .      | intergenic | -0.509 | 344421      | rs7932 | 3 |
| AC.GT       | 6 | 114286376 | 114286385 | 5       | .                  | .      | intergenic | .      | .           | .      | 2 |
| AAAAC.GTTTT | 6 | 114469533 | 114469561 | 4.83333 | .                  | .      | intergenic | .      | rs790592644 | .      | 2 |
| AT.AT       | 6 | 114481315 | 114481325 | 5.5     | .                  | .      | intergenic | 0.088  | rs792776424 | .      | 2 |
| AAT.ATT     | 6 | 114712169 | 114712180 | 4       | .                  | .      | intergenic | 0.045  | .           | .      | 2 |
| AG.CT       | 6 | 114995578 | 114995600 | 11.5    | .                  | .      | intergenic | -0.081 | .           | .      | 3 |
| AT.AT       | 6 | 115250733 | 115250747 | 7.5     | .                  | .      | intergenic | .      | .           | .      | 2 |
| AT.AT       | 6 | 115398630 | 115398646 | 8.5     | .                  | .      | intergenic | -0.022 | rs791048840 | .      | 2 |
| AC.GT       | 6 | 115628804 | 115628815 | 6       | .                  | .      | intergenic | -0.435 | rs790904949 | .      | 2 |
| AAAT.ATTT   | 6 | 115660113 | 115660146 | 8.5     | .                  | .      | intergenic | .      | rs792684981 | .      | 2 |
| ATC.GAT     | 6 | 116028372 | 116028411 | 13.3333 | .                  | .      | intergenic | 0.139  | .           | .      | 2 |
| AT.AT       | 6 | 116177083 | 116177102 | 10      | .                  | .      | intergenic | -0.011 | rs788985486 | .      | 2 |
| AC.GT       | 6 | 116248004 | 116248034 | 15.5    | .                  | .      | intergenic | -0.001 | .           | .      | 2 |
| ATC.GAT     | 6 | 116265924 | 116265937 | 4.66667 | .                  | .      | intergenic | .      | rs787392286 | .      | 2 |
| AT.AT       | 6 | 116272303 | 116272319 | 8.5     | .                  | .      | intergenic | -0.039 | rs793493824 | .      | 2 |
| AC.GT       | 6 | 116433204 | 116433216 | 6.5     | .                  | .      | intergenic | 0.306  | rs788011604 | .      | 3 |
| AAT.ATT     | 6 | 116561775 | 116561805 | 10.3333 | .                  | .      | intergenic | -0.066 | .           | .      | 2 |
| AG.CT       | 6 | 116668583 | 116668592 | 5       | .                  | .      | intergenic | -0.126 | rs788494159 | .      | 2 |
| AC.GT       | 6 | 116820353 | 116820365 | 6.5     | .                  | .      | intergenic | -0.016 | .           | .      | 2 |
| AAAT.ATTT   | 6 | 116853554 | 116853566 | 3.25    | .                  | .      | intergenic | .      | .           | .      | 2 |
| AC.GT       | 6 | 116963146 | 116963158 | 6.5     | .                  | .      | intergenic | -0.226 | .           | .      | 3 |
| AAAAT.ATTTT | 6 | 117148363 | 117148385 | 4.6     | .                  | .      | intergenic | -0.09  | rs787214380 | .      | 2 |
| AG.CT       | 6 | 117373637 | 117373649 | 6.5     | .                  | .      | intergenic | 0.004  | rs786703456 | .      | 2 |
| AC.GT       | 6 | 117450972 | 117450985 | 7       | .                  | .      | intergenic | .      | rs709573832 | .      | 4 |
| AG.CT       | 6 | 117565898 | 117565911 | 7       | .                  | .      | intergenic | 0.318  | rs789172462 | .      | 2 |
| AC.GT       | 6 | 117746379 | 117746393 | 7.5     | .                  | .      | intergenic | -0.089 | 305384      | rs7931 | 3 |
| AT.AT       | 6 | 117797082 | 117797093 | 6       | .                  | .      | intergenic | 0.887  | rs791722278 | .      | 2 |
| AT.AT       | 6 | 118011701 | 118011712 | 6       | ENSSSCT00000004151 | PIK3C3 | intron     | 0.515  | .           | .      | 2 |
| AC.GT       | 6 | 118109718 | 118109730 | 6.5     | .                  | .      | intergenic | .      | .           | .      | 4 |
| AAAC.GTTT   | 6 | 118311648 | 118311666 | 4.75    | .                  | .      | intergenic | .      | 265494      | rs7914 | 2 |
| AAC.GTT     | 6 | 119184353 | 119184367 | 5       | .                  | .      | intergenic | .      | rs787789676 | .      | 2 |
| AAAC.GTTT   | 6 | 119456221 | 119456254 | 8.5     | .                  | .      | intergenic | 0.115  | 103828      | rs7916 | 4 |
| AAAC.GTTT   | 6 | 119689812 | 119689845 | 8.5     | .                  | .      | intergenic | 0.258  | rs788122143 | .      | 2 |
| ATCC.GGAT   | 6 | 119697765 | 119697779 | 3.75    | .                  | .      | intergenic | -0.05  | .           | .      | 2 |
| AAC.GTT     | 6 | 119713418 | 119713431 | 4.66667 | .                  | .      | intergenic | 0.153  | 301154      | rs7867 | 2 |
| AC.GT       | 6 | 120307655 | 120307666 | 6       | .                  | .      | intergenic | 0.215  | rs788693706 | .      | 4 |
| AAAT.ATTT   | 6 | 120372156 | 120372177 | 5.5     | .                  | .      | intergenic | 0.217  | rs791866251 | .      | 2 |
| AAAT.ATTT   | 6 | 120484902 | 120484920 | 4.75    | .                  | .      | intergenic | 0.015  | 385635      | rs7930 | 2 |
| AAT.ATT     | 6 | 120695808 | 120695823 | 5.33333 | .                  | .      | intergenic | -0.046 | 775695      | rs7870 | 2 |
| AT.AT       | 6 | 120816057 | 120816081 | 12.5    | .                  | .      | intergenic | 1.66   | 719325      | rs7931 | 2 |
| AT.AT       | 6 | 120926659 | 120926670 | 6       | .                  | .      | intergenic | -0.012 | rs787173094 | .      | 2 |
| AAAC.GTTT   | 6 | 121179689 | 121179704 | 4       | .                  | .      | intergenic | -0.189 | rs789649388 | .      | 2 |
| AG.CT       | 6 | 121181736 | 121181750 | 7.5     | .                  | .      | intergenic | -0.059 | .           | .      | 2 |
| AAAGG.CCTTT | 6 | 121297370 | 121297392 | 4.6     | .                  | .      | intergenic | -0.222 | rs789253107 | .      | 2 |
| AAAT.ATTT   | 6 | 121395690 | 121395704 | 3.75    | .                  | .      | intergenic | 0.197  | .           | .      | 2 |
| AC.GT       | 6 | 121460077 | 121460087 | 5.5     | .                  | .      | intergenic | -0.075 | rs196960707 | .      | 3 |
| AAAAG.CTTTT | 6 | 121630387 | 121630404 | 3.6     | .                  | .      | intergenic | -0.006 | rs790656416 | .      | 2 |
| AG.CT       | 6 | 121936209 | 121936221 | 6.5     | .                  | .      | intergenic | -0.052 | rs786503376 | .      | 2 |
| AT.AT       | 6 | 121968084 | 121968100 | 8.5     | ENSSSCT00000004163 | LPHN2  | intron     | 0.275  | rs786596200 | .      | 2 |
| AC.GT       | 6 | 122283987 | 122283997 | 5.5     | .                  | .      | intergenic | 0.595  | rs791373771 | .      | 2 |
| AG.CT       | 6 | 122756467 | 122756477 | 5.5     | .                  | .      | intergenic | 0.394  | .           | .      | 3 |
| AAT.ATT     | 6 | 122838667 | 122838680 | 4.66667 | .                  | .      | intergenic | -0.088 | rs790214030 | .      | 2 |
| AAC.GTT     | 6 | 122847847 | 122847860 | 4.66667 | .                  | .      | intergenic | 0.53   | rs792026947 | .      | 2 |
| AC.GT       | 6 | 122925815 | 122925833 | 9.5     | .                  | .      | intergenic | -0.071 | 183029      | rs7934 | 2 |
| AAAC.GTTT   | 6 | 122928274 | 122928294 | 5.25    | .                  | .      | intergenic | -0.029 | rs787088260 | .      | 2 |
| AT.AT       | 6 | 122945893 | 122945928 | 18      | .                  | .      | intergenic | -0.276 | rs787173080 | .      | 2 |
| AT.AT       | 6 | 123162216 | 123162233 | 9       | .                  | .      | intergenic | -0.146 | rs789152730 | .      | 2 |
| AAAC.GTTT   | 6 | 123249324 | 123249347 | 6       | .                  | .      | intergenic | .      | rs787244759 | .      | 2 |
| AAAC.GTTT   | 6 | 123293068 | 123293086 | 4.75    | .                  | .      | intergenic | .      | .           | .      | 2 |
| AG.CT       | 6 | 123325638 | 123325651 | 7       | .                  | .      | intergenic | 0.017  | rs787698180 | .      | 2 |
| AACAC.GTGTT | 6 | 123563269 | 123563284 | 3.2     | .                  | .      | intergenic | .      | 362557      | rs7890 | 2 |
| AAAG.CTTT   | 6 | 123689299 | 123689321 | 5.75    | .                  | .      | intergenic | -0.09  | 367552      | rs7881 | 2 |
| ATC.GAT     | 6 | 123700242 | 123700254 | 4.33333 | .                  | .      | intergenic | 0.61   | rs786848753 | .      | 2 |
| AAAT.ATTT   | 6 | 123902674 | 123902692 | 4.75    | .                  | .      | intergenic | 0.626  | .           | .      | 2 |
| AAAT.ATTT   | 6 | 123920457 | 123920478 | 5.5     | .                  | .      | intergenic | -0.149 | rs704502297 | .      | 2 |
| AAC.GTT     | 6 | 123999531 | 123999547 | 5.66667 | .                  | .      | intergenic | .      | 371445      | rs7869 | 3 |
| AAAAT.ATTTT | 6 | 124006877 | 124006900 | 4.8     | .                  | .      | intergenic | -0.072 | 720572      | rs7902 | 2 |
| AGGG.CCCT   | 6 | 124141937 | 124141948 | 3       | .                  | .      | intergenic | -0.204 | .           | .      | 2 |
| AAGAG.CTCTT | 6 | 124247551 | 124247583 | 5.5     | .                  | .      | intergenic | -0.107 | rs789311194 | .      | 2 |
| AT.AT       | 6 | 124351908 | 124351918 | 5.5     | .                  | .      | intergenic | -0.093 | .           | .      | 4 |
| AAAC.GTTT   | 6 | 124406662 | 124406681 | 5       | .                  | .      | intergenic | 1.61   | 398734      | rs7863 | 2 |
| AAAC.GTTT   | 6 | 124633551 | 124633571 | 5.25    | .                  | .      | intergenic | .      | rs792153091 | .      | 2 |
| AAAC.GTTT   | 6 | 125136573 | 125136586 | 3.5     | .                  | .      | intergenic | 0.56   | 341467      | rs7873 | 2 |
| AAAT.ATTT   | 6 | 125176360 | 125176381 | 5.5     | .                  | .      | intergenic | 0.015  | rs786540515 | .      | 3 |
| AG.CT       | 6 | 125232775 | 125232789 | 7.5     | .                  | .      | intergenic | .      | 353163      | rs7865 | 2 |
| AAG.CTT     | 6 | 125620651 | 125620664 | 4.66667 | ENSSSCT00000029114 | NEXN   | intron     | .      | 311553      | rs7894 | 3 |
| AAG.CTT     | 6 | 125620651 | 125620664 | 4.66667 | ENSSSCT00000004170 | NEXN   | intron     | .      | 311553      | rs7894 | 3 |
| AAG.CTT     | 6 | 125620651 | 125620664 | 4.66667 | ENSSSCT00000004172 | FAM73A | intron     | .      | 311553      | rs7894 | 3 |
| AAG.CTT     | 6 | 125620651 | 125620664 | 4.66667 | ENSSSCT00000025176 | FAM73A | intron     | .      | 311553      | rs7894 | 3 |
| AT.AT       | 6 | 125648126 | 125648137 | 6       | ENSSSCT00000029114 | NEXN   | intron     | 0.173  | rs787010838 | .      | 2 |
| AT.AT       | 6 | 125648126 | 125648137 | 6       | ENSSSCT00000004170 | NEXN   | intron     | 0.173  | rs787010838 | .      | 2 |
| AT.AT       | 6 | 125648126 | 125648137 | 6       | ENSSSCT00000004172 | FAM73A | intron     | 0.173  | rs787010838 | .      | 2 |
| AT.AT       | 6 | 125648126 | 125648137 | 6       | ENSSSCT00000025176 | FAM73A | intron     | 0.173  | rs787010838 | .      | 2 |

|             |   |           |           |         |                    |          |            |        |               |   |
|-------------|---|-----------|-----------|---------|--------------------|----------|------------|--------|---------------|---|
| AG.CT       | 6 | 125833662 | 125833676 | 7.5     | .                  | .        | intergenic | .      | rs787958920   | 3 |
| AAG.CTT     | 6 | 125854388 | 125854408 | 7       | .                  | .        | intergenic | 0.078  | 784921 rs7934 | 2 |
| AC.GT       | 6 | 126219697 | 126219715 | 9.5     | ENSSSCT00000004175 | AK5      | intron     | 0.065  | rs788921795   | 4 |
| AATC.GATT   | 6 | 126507518 | 126507543 | 6.5     | .                  | .        | intergenic | 0.142  | 322667 rs7876 | 2 |
| AAG.CTT     | 6 | 126763776 | 126763790 | 5       | .                  | .        | intergenic | 0      | .             | 3 |
| AT.AT       | 6 | 126873691 | 126873701 | 5.5     | .                  | .        | intergenic | -0.016 | rs787206463   | 2 |
| AAAAC.GTTTT | 6 | 127202831 | 127202861 | 6.2     | .                  | .        | intergenic | 0.163  | 135716 rs7921 | 2 |
| AC.GT       | 6 | 127284905 | 127284917 | 6.5     | .                  | .        | intergenic | -0.091 | .             | 4 |
| AAAAG.CTTTT | 6 | 127395502 | 127395525 | 4.8     | ENSSSCT00000023892 | MSH4     | intron     | .      | 381646 rs7885 | 2 |
| AAAAG.CTTTT | 6 | 127395502 | 127395525 | 4.8     | ENSSSCT00000004176 | MSH4     | intron     | .      | 381646 rs7885 | 2 |
| AG.CT       | 6 | 127452830 | 127452841 | 6       | ENSSSCT00000023892 | MSH4     | intron     | .      | .             | 3 |
| AG.CT       | 6 | 127452830 | 127452841 | 6       | ENSSSCT00000004176 | MSH4     | intron     | .      | .             | 3 |
| AAAC.GTTT   | 6 | 127713981 | 127713993 | 3.25    | ENSSSCT00000004180 | SLC44A5  | intron     | 0.146  | rs790709400   | 2 |
| AT.AT       | 6 | 128088640 | 128088649 | 5       | .                  | .        | intergenic | 0.329  | .             | 2 |
| AG.CT       | 6 | 128244659 | 128244671 | 6.5     | .                  | .        | intergenic | 0.047  | rs789479310   | 2 |
| AT.AT       | 6 | 128306895 | 128306906 | 6       | ENSSSCT00000004183 | CRYZ     | intron     | 0.153  | 368677 rs7899 | 2 |
| AC.GT       | 6 | 128487208 | 128487229 | 11      | .                  | .        | intergenic | -0.053 | rs790104646   | 2 |
| AAAC.GTTT   | 6 | 128608064 | 128608095 | 8       | .                  | .        | intergenic | -0.006 | rs791889768   | 2 |
| AT.AT       | 6 | 128831613 | 128831624 | 6       | .                  | .        | intergenic | .      | rs791830249   | 2 |
| AC.GT       | 6 | 128902905 | 128902921 | 8.5     | .                  | .        | intergenic | .      | rs791307121   | 4 |
| AT.AT       | 6 | 129130342 | 129130353 | 6       | .                  | .        | intergenic | .      | rs792164700   | 2 |
| AT.AT       | 6 | 129141336 | 129141347 | 6       | .                  | .        | intergenic | .      | 304066 rs7919 | 2 |
| AC.GT       | 6 | 129157701 | 129157715 | 7.5     | .                  | .        | intergenic | 0.04   | .             | 2 |
| AT.AT       | 6 | 129194506 | 129194516 | 5.5     | .                  | .        | intergenic | -0.13  | rs791577059   | 2 |
| AC.GT       | 6 | 129549587 | 129549601 | 7.5     | .                  | .        | intergenic | -0.125 | rs789954303   | 2 |
| AT.AT       | 6 | 129550461 | 129550472 | 6       | .                  | .        | intergenic | 0.318  | .             | 2 |
| AC.GT       | 6 | 129582715 | 129582727 | 6.5     | .                  | .        | intergenic | -0.059 | rs693594986   | 4 |
| ACAT.ATGT   | 6 | 129790977 | 129791003 | 6.75    | .                  | .        | intergenic | 0.27   | 227482 rs7931 | 2 |
| AAAC.GTTT   | 6 | 129855302 | 129855324 | 5.75    | .                  | .        | intergenic | -0.157 | rs196948674   | 2 |
| AGAT.ATCT   | 6 | 129947662 | 129947682 | 5.25    | .                  | .        | intergenic | .      | 172668 rs7931 | 2 |
| AC.GT       | 6 | 130012569 | 130012580 | 6       | .                  | .        | intergenic | -0.093 | rs790799676   | 2 |
| AG.CT       | 6 | 130101661 | 130101672 | 6       | .                  | .        | intergenic | 0.199  | 194423 rs7919 | 2 |
| AG.CT       | 6 | 130206726 | 130206747 | 11      | .                  | .        | intergenic | .      | 326037 rs7925 | 3 |
| AAAAT.ATTTT | 6 | 130446558 | 130446577 | 4       | .                  | .        | intergenic | -0.055 | rs793147530   | 2 |
| AAAC.GTTT   | 6 | 130451897 | 130451909 | 3.25    | .                  | .        | intergenic | -0.31  | 254252 rs7870 | 2 |
| AAAAC.GTTTT | 6 | 130464637 | 130464655 | 3.8     | .                  | .        | intergenic | 0.112  | .             | 2 |
| AG.CT       | 6 | 130545694 | 130545706 | 6.5     | .                  | .        | intergenic | 0.05   | rs786335034   | 2 |
| AC.GT       | 6 | 130773803 | 130773813 | 5.5     | ENSSSCT00000031624 | NEGR1    | intron     | -0.158 | rs787914706   | 2 |
| AC.GT       | 6 | 130778001 | 130778014 | 7       | ENSSSCT00000031624 | NEGR1    | intron     | -0.086 | 219528 rs7862 | 2 |
| AC.GT       | 6 | 130785012 | 130785036 | 12.5    | ENSSSCT00000031624 | NEGR1    | intron     | 0.069  | 308948 rs7926 | 2 |
| AT.AT       | 6 | 130811514 | 130811532 | 9.5     | ENSSSCT00000031624 | NEGR1    | intron     | .      | rs792580596   | 2 |
| AAT.ATT     | 6 | 131317625 | 131317639 | 5       | .                  | .        | intergenic | 0.107  | 374244 rs7908 | 3 |
| AATG.CATT   | 6 | 131345936 | 131345958 | 5.75    | .                  | .        | intergenic | 0.059  | rs792508496   | 2 |
| AAG.CTT     | 6 | 131671832 | 131671857 | 8.66667 | .                  | .        | intergenic | -0.112 | rs786671145   | 2 |
| ATC.GAT     | 6 | 131921232 | 131921266 | 11.6667 | .                  | .        | intergenic | 0.132  | .             | 2 |
| AAAC.GTTT   | 6 | 131948668 | 131948688 | 5.25    | .                  | .        | intergenic | .      | 355485 rs7883 | 2 |
| AC.GT       | 6 | 132032014 | 132032028 | 7.5     | ENSSSCT00000004193 | CTH      | intron     | -0.018 | .             | 4 |
| AT.AT       | 6 | 132086337 | 132086352 | 8       | ENSSSCT00000004194 | ANKRD13C | intron     | 0.311  | 136296 rs7911 | 2 |
| AAAC.GTTT   | 6 | 132209283 | 132209302 | 5       | ENSSSCT00000004195 | SFRS11   | intron     | 1.993  | 146003 rs7906 | 2 |
| AAC.GTT     | 6 | 132368858 | 132368877 | 6.66667 | ENSSSCT00000004197 | LRRC7    | intron     | .      | 223086 rs7913 | 2 |
| AAAG.CTTT   | 6 | 132535235 | 132535257 | 5.75    | .                  | .        | intergenic | 0.229  | 330635 rs7921 | 2 |
| AATG.CATT   | 6 | 132613430 | 132613452 | 5.75    | ENSSSCT00000027842 | .        | promoter   | -0.053 | 338771 rs7883 | 2 |
| AC.GT       | 6 | 132619192 | 132619217 | 13      | .                  | .        | intergenic | -0.155 | 342440 rs7923 | 5 |
| AAAC.GTTT   | 6 | 132910681 | 132910705 | 6.25    | .                  | .        | intergenic | .      | rs793236703   | 3 |
| AT.AT       | 6 | 133154288 | 133154299 | 6       | .                  | .        | intergenic | .      | 353235 rs7880 | 2 |
| ACAC.GTGT   | 6 | 133185266 | 133185290 | 6.25    | .                  | .        | intergenic | 0.149  | .             | 2 |
| AC.GT       | 6 | 133200140 | 133200149 | 5       | .                  | .        | intergenic | 0.404  | rs786793343   | 2 |
| AAAAT.ATTTT | 6 | 133224407 | 133224431 | 5       | .                  | .        | intergenic | .      | rs791362212   | 2 |
| AT.AT       | 6 | 133224931 | 133224940 | 5       | .                  | .        | intergenic | .      | rs787928544   | 2 |
| AC.GT       | 6 | 133337118 | 133337138 | 10.5    | .                  | .        | intergenic | .      | rs695544273   | 3 |
| AAAT.ATTT   | 6 | 133351039 | 133351052 | 3.5     | .                  | .        | intergenic | .      | rs793836119   | 2 |
| AT.AT       | 6 | 133486113 | 133486123 | 5.5     | .                  | .        | intergenic | 0.001  | 374650 rs7891 | 2 |
| AAAG.CTTT   | 6 | 133630589 | 133630612 | 6       | .                  | .        | intergenic | 0.573  | .             | 3 |
| AAAT.ATTT   | 6 | 133728862 | 133728880 | 4.75    | .                  | .        | intergenic | 0.052  | rs791466090   | 2 |
| AC.GT       | 6 | 133809778 | 133809791 | 7       | ENSSSCT00000004200 | GPR177   | intron     | 0.229  | rs788661799   | 2 |
| AC.GT       | 6 | 133824447 | 133824456 | 5       | .                  | .        | intergenic | -0.072 | .             | 2 |
| AAAT.ATTT   | 6 | 133943197 | 133943212 | 4       | .                  | .        | intergenic | .      | rs792150133   | 2 |
| AC.GT       | 6 | 134140234 | 134140250 | 8.5     | ENSSSCT00000032706 | IL12RB2  | intron     | 0.204  | rs787793444   | 5 |
| AC.GT       | 6 | 134140234 | 134140250 | 8.5     | ENSSSCT00000004204 | IL12RB2  | intron     | 0.204  | rs787793444   | 5 |
| AC.GT       | 6 | 134140234 | 134140250 | 8.5     | ENSSSCT00000036495 | IL12RB2  | intron     | 0.204  | rs787793444   | 5 |
| AC.GT       | 6 | 134140234 | 134140250 | 8.5     | ENSSSCT00000032636 | IL12RB2  | intron     | 0.204  | rs787793444   | 5 |
| AC.GT       | 6 | 134140234 | 134140250 | 8.5     | ENSSSCT00000032700 | IL12RB2  | intron     | 0.204  | rs787793444   | 5 |
| AG.CT       | 6 | 134150180 | 134150193 | 7       | ENSSSCT00000032706 | IL12RB2  | intron     | 1.313  | 386634 rs7898 | 2 |
| AG.CT       | 6 | 134150180 | 134150193 | 7       | ENSSSCT00000004204 | IL12RB2  | intron     | 1.313  | 386634 rs7898 | 2 |
| AG.CT       | 6 | 134150180 | 134150193 | 7       | ENSSSCT00000036495 | IL12RB2  | intron     | 1.313  | 386634 rs7898 | 2 |
| AG.CT       | 6 | 134150180 | 134150193 | 7       | ENSSSCT00000032636 | IL12RB2  | intron     | 1.313  | 386634 rs7898 | 2 |
| AG.CT       | 6 | 134150180 | 134150193 | 7       | ENSSSCT00000032700 | IL12RB2  | intron     | 1.313  | 386634 rs7898 | 2 |
| AG.CT       | 6 | 134164945 | 134164954 | 5       | .                  | .        | intergenic | 0.065  | .             | 2 |
| AAAC.GTTT   | 6 | 134235667 | 134235682 | 4       | ENSSSCT00000033328 | IL23R    | intron     | 0.07   | 384541 rs7865 | 2 |
| AAAC.GTTT   | 6 | 134235667 | 134235682 | 4       | ENSSSCT00000033223 | IL23R    | intron     | 0.07   | 384541 rs7865 | 2 |
| AAAC.GTTT   | 6 | 134235667 | 134235682 | 4       | ENSSSCT00000034103 | IL23R    | intron     | 0.07   | 384541 rs7865 | 2 |
| AAAC.GTTT   | 6 | 134235667 | 134235682 | 4       | ENSSSCT00000032983 | IL23R    | intron     | 0.07   | 384541 rs7865 | 2 |
| AAAC.GTTT   | 6 | 134235667 | 134235682 | 4       | ENSSSCT00000004206 | IL23R    | intron     | 0.07   | 384541 rs7865 | 2 |
| AAAC.GTTT   | 6 | 134235667 | 134235682 | 4       | ENSSSCT00000032866 | IL23R    | intron     | 0.07   | 384541 rs7865 | 2 |

|             |   |           |           |         |                    |          |            |        |             |         |   |
|-------------|---|-----------|-----------|---------|--------------------|----------|------------|--------|-------------|---------|---|
| AAAC.GTTT   | 6 | 134235667 | 134235682 | 4       | ENSSSCT00000034401 | IL23R    | intron     | 0.07   | rs84541     | rs7865  | 2 |
| AAAC.GTTT   | 6 | 134235667 | 134235682 | 4       | ENSSSCT00000034079 | IL23R    | intron     | 0.07   | rs84541     | rs7865  | 2 |
| AAAC.GTTT   | 6 | 134235667 | 134235682 | 4       | ENSSSCT00000033490 | IL23R    | intron     | 0.07   | rs84541     | rs7865  | 2 |
| AAAC.GTTT   | 6 | 134235667 | 134235682 | 4       | ENSSSCT00000036227 | IL23R    | intron     | 0.07   | rs84541     | rs7865  | 2 |
| AAAC.GTTT   | 6 | 134235667 | 134235682 | 4       | ENSSSCT00000033623 | IL23R    | intron     | 0.07   | rs84541     | rs7865  | 2 |
| AAAT.ATTT   | 6 | 134306042 | 134306054 | 3.25    | .                  | .        | intergenic | 0.288  | .           | .       | 2 |
| AATG.CATT   | 6 | 134310908 | 134310934 | 6.75    | .                  | .        | intergenic | 0.026  | rs13993     | rs7908  | 2 |
| AAAC.GTTT   | 6 | 134389459 | 134389478 | 5       | .                  | .        | intergenic | .      | rs788894222 | .       | 3 |
| AT.AT       | 6 | 134435595 | 134435613 | 9.5     | ENSSSCT00000004208 | C1orf141 | intron     | 0.023  | .           | .       | 2 |
| AAAAT.ATTTT | 6 | 134440377 | 134440391 | 3       | ENSSSCT00000004208 | C1orf141 | intron     | 0.455  | rs78815     | rs7864  | 2 |
| AAAAC.GTTTT | 6 | 134766536 | 134766558 | 3.83333 | .                  | .        | intergenic | .      | rs789857878 | .       | 2 |
| ATC.GAT     | 6 | 134842114 | 134842128 | 5       | .                  | .        | intergenic | -0.026 | rs349583    | rs7888  | 2 |
| AC.GT       | 6 | 134850229 | 134850242 | 7       | .                  | .        | intergenic | -0.016 | .           | .       | 3 |
| AAAAC.GTTTT | 6 | 134861122 | 134861142 | 4.2     | .                  | .        | intergenic | -0.021 | rs70362     | rs7916  | 2 |
| AAC.GTT     | 6 | 134885599 | 134885617 | 6.33333 | ENSSSCT00000004211 | PDE4B    | intron     | 0.126  | rs78744     | rs1868  | 2 |
| AAAC.GTTT   | 6 | 134898718 | 134898733 | 4       | ENSSSCT00000004211 | PDE4B    | intron     | -0.021 | .           | .       | 2 |
| AC.GT       | 6 | 135120122 | 135120133 | 6       | .                  | .        | intergenic | 0.069  | rs195692    | rs7886  | 2 |
| AC.GT       | 6 | 135331792 | 135331803 | 6       | .                  | .        | intergenic | 0.244  | rs78957     | rs6686  | 2 |
| ACC.GGT     | 6 | 135393235 | 135393247 | 4.33333 | .                  | .        | intergenic | 0.087  | .           | .       | 2 |
| AG.CT       | 6 | 135442826 | 135442836 | 5.5     | ENSSSCT00000004213 | DNAJC6   | intron     | 0.059  | rs78874     | rs4574  | 2 |
| AAAC.GTTT   | 6 | 135675406 | 135675439 | 8.5     | .                  | .        | intergenic | .      | rs79135     | rs2230  | 2 |
| AAC.GTT     | 6 | 135768458 | 135768474 | 5.66667 | .                  | .        | intergenic | 0.023  | rs79153     | rs133   | 2 |
| AAAAC.GTTTT | 6 | 135886391 | 135886409 | 3.16667 | .                  | .        | intergenic | -0.036 | rs247345    | rs7924  | 2 |
| AATT.AATT   | 6 | 136154207 | 136154219 | 3.25    | ENSSSCT00000005331 | CACHD1   | intron     | 0.132  | rs79158     | rs0540  | 2 |
| AG.CT       | 6 | 136195495 | 136195505 | 5.5     | .                  | .        | intergenic | 1.01   | rs78809     | rs6544  | 4 |
| AC.GT       | 6 | 136218927 | 136218936 | 5       | .                  | .        | intergenic | 1.522  | rs78692     | rs4098  | 2 |
| AGAT.ATCT   | 6 | 136233518 | 136233555 | 9.5     | .                  | .        | intergenic | 0.093  | rs78707     | rs6610  | 2 |
| AAT.ATT     | 6 | 136327478 | 136327493 | 5.33333 | .                  | .        | intergenic | 0.006  | rs78768     | rs3874  | 2 |
| AAAAC.GTTTT | 6 | 136575569 | 136575589 | 4.2     | .                  | .        | intergenic | .      | rs79359     | rs8614  | 2 |
| AAT.ATT     | 6 | 136753075 | 136753091 | 5.66667 | ENSSSCT00000004217 | UBE2U    | intron     | .      | rs33671     | rs7905  | 2 |
| AATG.CATT   | 6 | 137037447 | 137037469 | 5.75    | .                  | .        | intergenic | -0.137 | rs79254     | rs0804  | 2 |
| AAAAC.GTTTT | 6 | 137139578 | 137139598 | 4.2     | .                  | .        | intergenic | -0.034 | rs79116     | rs6823  | 2 |
| AAAC.GTTT   | 6 | 137140255 | 137140270 | 4       | .                  | .        | intergenic | -0.097 | rs19172     | rs7870  | 2 |
| AAAAC.GTTTT | 6 | 137183923 | 137183941 | 3.8     | ENSSSCT00000004219 | PGM1     | intron     | 0.409  | rs79043     | rs3994  | 2 |
| AAAT.ATTT   | 6 | 137199645 | 137199667 | 5.75    | ENSSSCT00000004219 | PGM1     | intron     | 0.125  | rs78668     | rs0584  | 2 |
| AATC.GATT   | 6 | 137217631 | 137217655 | 6.25    | ENSSSCT00000004219 | PGM1     | intron     | 0.106  | rs78922     | rs9786  | 2 |
| AG.CT       | 6 | 137562328 | 137562337 | 5       | .                  | .        | intergenic | -0.018 | rs78626     | rs9567  | 3 |
| AAAT.ATTT   | 6 | 137586950 | 137586966 | 4.25    | .                  | .        | intergenic | 0.27   | rs79053     | rs3339  | 2 |
| AAAC.GTTT   | 6 | 137633844 | 137633862 | 4.75    | .                  | .        | intergenic | -0.236 | rs368083    | rs7903  | 2 |
| AAT.ATT     | 6 | 137637185 | 137637197 | 4.33333 | .                  | .        | intergenic | 0.155  | .           | .       | 3 |
| AC.GT       | 6 | 137676351 | 137676363 | 6.5     | .                  | .        | intergenic | -0.001 | rs78728     | rs1539  | 3 |
| AC.GT       | 6 | 138036359 | 138036369 | 5.5     | .                  | .        | intergenic | 0.284  | .           | .       | 2 |
| AT.AT       | 6 | 138390729 | 138390750 | 11      | .                  | .        | intergenic | 0.132  | rs69213     | rs3926  | 2 |
| AC.GT       | 6 | 138653593 | 138653607 | 7.5     | .                  | .        | intergenic | .      | rs78861     | rs3161  | 2 |
| AC.GT       | 6 | 138702228 | 138702243 | 8       | .                  | .        | intergenic | .      | rs79068     | rs5471  | 4 |
| AAAT.ATTT   | 6 | 138747991 | 138748009 | 4.75    | .                  | .        | intergenic | -0.094 | rs78623     | rs2921  | 2 |
| AAAAT.ATTTT | 6 | 139283186 | 139283202 | 3.4     | .                  | .        | intergenic | 0.445  | rs78648     | rs1231  | 3 |
| AT.AT       | 6 | 139492027 | 139492036 | 5       | .                  | .        | intergenic | -0.26  | .           | .       | 2 |
| AC.GT       | 6 | 139499566 | 139499576 | 5.5     | .                  | .        | intergenic | -0.006 | .           | .       | 2 |
| AT.AT       | 6 | 139532666 | 139532675 | 5       | .                  | .        | intergenic | 0.051  | rs78773     | rs39405 | 2 |
| AAAG.CTTT   | 6 | 139727183 | 139727195 | 3.25    | ENSSSCT00000004232 | C1orf87  | intron     | 0.062  | .           | .       | 2 |
| AG.CT       | 6 | 139774942 | 139774956 | 7.5     | .                  | .        | intergenic | 0.21   | rs79190     | rs7947  | 2 |
| AC.GT       | 6 | 140083539 | 140083548 | 5       | .                  | .        | intergenic | 0.166  | rs69311     | rs19419 | 3 |
| AG.CT       | 6 | 140150906 | 140150934 | 14.5    | ENSSSCT00000004235 | HOOK1    | intron     | 0.004  | rs277782    | rs7882  | 2 |
| AT.AT       | 6 | 140154043 | 140154053 | 5.5     | ENSSSCT00000004235 | HOOK1    | intron     | 0.049  | rs79323     | rs2280  | 2 |
| AAAT.ATTT   | 6 | 140378413 | 140378434 | 5.5     | ENSSSCT00000004236 | .        | intron     | -0.109 | rs132703    | rs7910  | 2 |
| AAAC.GTTT   | 6 | 140445960 | 140445978 | 4.75    | ENSSSCT00000004237 | .        | intron     | .      | rs78673     | rs0869  | 4 |
| AC.GT       | 6 | 140465145 | 140465162 | 9       | ENSSSCT00000004237 | .        | intron     | 0.859  | rs304930    | rs7880  | 2 |
| AAT.ATT     | 6 | 140581475 | 140581488 | 4.66667 | ENSSSCT00000004237 | .        | intron     | 0.12   | rs79212     | rs2379  | 2 |
| AAC.GTT     | 6 | 140581753 | 140581770 | 6       | ENSSSCT00000004237 | .        | intron     | 0.401  | rs327766    | rs7904  | 2 |
| AC.GT       | 6 | 140634331 | 140634345 | 7.5     | ENSSSCT00000004237 | .        | intron     | 0.047  | rs78699     | rs0090  | 2 |
| AAAT.ATTT   | 6 | 140668271 | 140668293 | 5.75    | ENSSSCT00000004237 | .        | intron     | 0.371  | rs23881     | rs7899  | 2 |
| AG.CT       | 6 | 140734754 | 140734764 | 5.5     | .                  | .        | intergenic | 0.077  | rs79137     | rs5823  | 2 |
| AC.GT       | 6 | 140767849 | 140767859 | 5.5     | .                  | .        | intergenic | -0.044 | rs79036     | rs4801  | 2 |
| AT.AT       | 6 | 140784833 | 140784843 | 5.5     | .                  | .        | intergenic | 0.063  | rs79140     | rs0936  | 3 |
| AG.CT       | 6 | 140954432 | 140954443 | 6       | .                  | .        | intergenic | -0.04  | rs78977     | rs148   | 3 |
| AAAT.ATTT   | 6 | 140969179 | 140969201 | 5.75    | .                  | .        | intergenic | 0.052  | rs187832    | rs7901  | 2 |
| AAAAC.GTTTT | 6 | 141030491 | 141030519 | 5.8     | .                  | .        | intergenic | -0.008 | rs79098     | rs7255  | 2 |
| AC.GT       | 6 | 141040781 | 141040804 | 12      | .                  | .        | intergenic | -0.062 | rs764959    | rs7917  | 3 |
| AT.AT       | 6 | 141047426 | 141047452 | 13.5    | .                  | .        | intergenic | -0.208 | rs177467    | rs7898  | 3 |
| AAAAC.GTTTT | 6 | 141281208 | 141281233 | 5.2     | .                  | .        | intergenic | .      | rs38307     | rs7894  | 2 |
| AC.GT       | 6 | 141402348 | 141402362 | 7.5     | .                  | .        | intergenic | -0.024 | rs142328    | rs7862  | 2 |
| AT.AT       | 6 | 141410080 | 141410089 | 5       | .                  | .        | intergenic | 0.171  | .           | .       | 2 |
| AT.AT       | 6 | 141419993 | 141420010 | 9       | .                  | .        | intergenic | 0.015  | rs136173    | rs7867  | 3 |
| AAAT.ATTT   | 6 | 141620967 | 141620978 | 3       | .                  | .        | intergenic | -0.018 | .           | .       | 2 |
| ATCC.GGAT   | 6 | 141779841 | 141779861 | 5.25    | .                  | .        | intergenic | 0.069  | rs78843     | rs35093 | 2 |
| AC.GT       | 6 | 141917400 | 141917424 | 12.5    | .                  | .        | intergenic | -0.13  | rs78996     | rs68649 | 3 |
| AAAC.GTTT   | 6 | 142008740 | 142008758 | 4.75    | .                  | .        | intergenic | -0.156 | rs384148    | rs7870  | 2 |
| AT.AT       | 6 | 142009793 | 142009802 | 5       | .                  | .        | intergenic | -0.131 | rs78999     | rs6030  | 3 |
| AAAC.GTTT   | 6 | 142035255 | 142035280 | 6.5     | .                  | .        | intergenic | .      | rs69410     | rs9612  | 2 |
| AATG.CATT   | 6 | 142144489 | 142144502 | 3.5     | .                  | .        | intergenic | .      | .           | .       | 2 |
| AAAG.CTTT   | 6 | 142341162 | 142341188 | 6.75    | .                  | .        | intergenic | 0.862  | rs304514    | rs7930  | 2 |
| AAAC.GTTT   | 6 | 142375480 | 142375498 | 4.75    | .                  | .        | intergenic | 0.053  | rs21184     | rs7912  | 2 |
| AAAG.CTTT   | 6 | 142472804 | 142472820 | 4.25    | .                  | .        | intergenic | -0.08  | rs78623     | rs1613  | 3 |



|               |   |           |           |         |                    |         |            |        |                 |   |
|---------------|---|-----------|-----------|---------|--------------------|---------|------------|--------|-----------------|---|
| AAC.GTT       | 6 | 142542993 | 142543031 | 13      | .                  | .       | intergenic | 0.071  | rs786924206     | 2 |
| AAAATT.AATTTT | 6 | 142558671 | 142558691 | 3.5     | .                  | .       | intergenic | 0.055  | rs54949 rs7898  | 2 |
| AATG.CATT     | 6 | 142583058 | 142583075 | 4.5     | .                  | .       | intergenic | -0.009 | .               | 2 |
| AG.CT         | 6 | 142626182 | 142626193 | 6       | .                  | .       | intergenic | -0.174 | rs52587 rs7892  | 2 |
| AT.AT         | 6 | 142677805 | 142677825 | 10.5    | .                  | .       | intergenic | -0.098 | rs790965648     | 2 |
| AGC.GCT       | 6 | 142945594 | 142945608 | 5       | .                  | .       | intergenic | 0.287  | rs791322105     | 2 |
| AC.GT         | 6 | 143743220 | 143743231 | 6       | .                  | .       | intergenic | 0.108  | .               | 2 |
| AAAT.ATTT     | 6 | 143916331 | 143916349 | 4.75    | .                  | .       | intergenic | 0.027  | rs788199323     | 2 |
| AG.CT         | 6 | 144391436 | 144391446 | 5.5     | .                  | .       | intergenic | .      | .               | 2 |
| AAAT.ATTT     | 6 | 144410114 | 144410128 | 3.75    | .                  | .       | intergenic | .      | rs138241 rs7902 | 3 |
| AAT.ATT       | 6 | 144807787 | 144807804 | 6       | .                  | .       | intergenic | 0.047  | rs706766647     | 2 |
| AT.AT         | 6 | 144823953 | 144823980 | 14      | .                  | .       | intergenic | .      | rs787132390     | 2 |
| AGGGG.CCCCT   | 6 | 144910090 | 144910106 | 3.4     | .                  | .       | intergenic | -0.09  | rs792128324     | 2 |
| AAAAC.GTTTT   | 6 | 144994457 | 144994485 | 5.8     | .                  | .       | intergenic | 0.089  | rs788721642     | 2 |
| AAACC.GGTTT   | 6 | 145082498 | 145082515 | 3.6     | .                  | .       | intergenic | -0.102 | rs790222114     | 2 |
| AT.AT         | 6 | 145082619 | 145082644 | 13      | .                  | .       | intergenic | -0.117 | rs789002036     | 2 |
| AAGGG.CCCTT   | 6 | 145507517 | 145507553 | 6.16667 | ENSSSCT00000027891 | TMEM61  | intron     | 0.104  | rs384087 rs7873 | 3 |
| AG.CT         | 6 | 145529899 | 145529913 | 7.5     | .                  | .       | intergenic | -0.03  | .               | 2 |
| AG.CT         | 6 | 145534905 | 145534917 | 6.5     | .                  | .       | intergenic | -0.111 | rs791012087     | 2 |
| AAAC.GTTT     | 6 | 145587237 | 145587251 | 3.75    | .                  | .       | intergenic | .      | rs334627 rs7865 | 2 |
| AC.GT         | 6 | 145864768 | 145864780 | 6.5     | ENSSSCT00000031990 | LRRC42  | intron     | 0.321  | .               | 2 |
| AG.CT         | 6 | 145906813 | 145906824 | 6       | .                  | .       | intergenic | -0.167 | rs791081278     | 2 |
| AAAC.GTTT     | 6 | 145948419 | 145948433 | 3.75    | ENSSSCT00000029087 | TCEANC2 | intron     | 0.12   | rs791679163     | 2 |
| AG.CT         | 6 | 145980546 | 145980558 | 6.5     | .                  | .       | intergenic | 0.503  | .               | 4 |
| AAAC.GTTT     | 6 | 146486778 | 146486801 | 6       | .                  | .       | intergenic | .      | .               | 2 |
| AAGT.ACTT     | 6 | 146522472 | 146522486 | 3.75    | .                  | .       | intergenic | 1.19   | rs786329981     | 2 |
| AT.AT         | 6 | 146561038 | 146561056 | 9.5     | .                  | .       | intergenic | 0.166  | rs272228 rs7868 | 3 |
| AC.GT         | 6 | 146586050 | 146586064 | 7.5     | ENSSSCT00000004260 | APOER2  | intron     | 0.439  | rs791589891     | 2 |
| AAAC.GTTT     | 6 | 146847237 | 146847259 | 5.75    | ENSSSCT00000004264 | SLC1A7  | intron     | -0.179 | rs787039018     | 2 |
| AAAT.ATTT     | 6 | 147008791 | 147008806 | 4       | ENSSSCT00000004265 | SCP2    | intron     | 0.214  | rs267042 rs7883 | 2 |
| AATG.CATT     | 6 | 147169333 | 147169355 | 5.75    | ENSSSCT00000004269 | .       | intron     | 0.277  | rs101113 rs7897 | 2 |
| AAAAG.CTTTT   | 6 | 147330356 | 147330385 | 6       | ENSSSCT00000029203 | ZCCHC11 | intron     | 0.394  | rs786962198     | 2 |
| AAAAG.CTTTT   | 6 | 147330356 | 147330385 | 6       | ENSSSCT00000004271 | ZCCHC11 | intron     | 0.394  | rs786962198     | 2 |
| AAC.GTT       | 6 | 147582148 | 147582163 | 5.33333 | ENSSSCT00000004275 | ZFYVE9  | intron     | 0.832  | rs790707238     | 2 |
| AAAG.CTTT     | 6 | 147647936 | 147647961 | 6.5     | ENSSSCT00000004275 | ZFYVE9  | intron     | 0.201  | rs792940012     | 2 |
| AAAAG.CTTTT   | 6 | 147766683 | 147766703 | 4.2     | .                  | .       | intergenic | -0.133 | rs790370417     | 2 |
| AAT.ATT       | 6 | 147775653 | 147775676 | 8       | .                  | .       | intergenic | .      | .               | 2 |
| AAAT.ATTT     | 6 | 147923005 | 147923027 | 5.75    | ENSSSCT00000028423 | RAB3B   | intron     | 0.11   | rs258526 rs7880 | 2 |
| AAAT.ATTT     | 6 | 147923005 | 147923027 | 5.75    | ENSSSCT00000026725 | RAB3B   | intron     | 0.11   | rs258526 rs7880 | 2 |
| AAAT.ATTT     | 6 | 147939775 | 147939793 | 4.75    | ENSSSCT00000028423 | RAB3B   | intron     | 1.16   | rs789947516     | 3 |
| AAAT.ATTT     | 6 | 147939775 | 147939793 | 4.75    | ENSSSCT00000026725 | RAB3B   | intron     | 1.16   | rs789947516     | 3 |
| AAAT.ATTT     | 6 | 147941896 | 147941910 | 3.75    | ENSSSCT00000028423 | RAB3B   | intron     | 0.172  | .               | 2 |
| AAAT.ATTT     | 6 | 147941896 | 147941910 | 3.75    | ENSSSCT00000026725 | RAB3B   | intron     | 0.172  | .               | 2 |
| AC.GT         | 6 | 147943562 | 147943571 | 5       | ENSSSCT00000026725 | RAB3B   | intron     | 2.521  | rs786995489     | 3 |
| AC.GT         | 6 | 147943562 | 147943571 | 5       | ENSSSCT00000028423 | RAB3B   | intron     | 2.521  | rs786995489     | 3 |
| AAC.GTT       | 6 | 148033456 | 148033477 | 7.33333 | ENSSSCT00000004282 | NRD1    | intron     | 0.259  | rs101904 rs7880 | 3 |
| AC.GT         | 6 | 148162535 | 148162565 | 15.5    | ENSSSCT00000028073 | OSBPL9  | intron     | .      | rs712608 rs7925 | 2 |
| AAAC.GTTT     | 6 | 148167922 | 148167948 | 6.75    | ENSSSCT00000028073 | OSBPL9  | intron     | .      | rs792679049     | 2 |
| AAAAC.GTTTT   | 6 | 148171730 | 148171753 | 4       | ENSSSCT00000028073 | OSBPL9  | intron     | 0.192  | rs791822984     | 2 |
| AG.CT         | 6 | 148236263 | 148236273 | 5.5     | ENSSSCT00000028073 | OSBPL9  | intron     | 0.324  | rs253158 rs7867 | 2 |
| AAAC.GTTT     | 6 | 148383981 | 148383995 | 3.75    | .                  | .       | intergenic | 0.234  | .               | 2 |
| AAAAC.GTTTT   | 6 | 148648207 | 148648221 | 3       | .                  | .       | intergenic | 0.296  | rs788994166     | 2 |
| AAC.GTT       | 6 | 148873736 | 148873752 | 5.66667 | .                  | .       | intergenic | .      | rs790340445     | 2 |
| AC.GT         | 6 | 149030963 | 149030975 | 6.5     | ENSSSCT00000004289 | FAF1    | intron     | .      | .               | 4 |
| AC.GT         | 6 | 149030963 | 149030975 | 6.5     | ENSSSCT00000036500 | FAF1    | intron     | .      | .               | 4 |
| AT.AT         | 6 | 149222188 | 149222197 | 5       | ENSSSCT00000004289 | FAF1    | intron     | .      | .               | 2 |
| AT.AT         | 6 | 149222188 | 149222197 | 5       | ENSSSCT00000036500 | FAF1    | intron     | .      | .               | 2 |
| AAAAC.GTTTT   | 6 | 149817096 | 149817120 | 5       | .                  | .       | intergenic | 0.288  | rs305106 rs7921 | 2 |
| AAAC.GTTT     | 6 | 149821961 | 149821979 | 4.75    | .                  | .       | intergenic | 0.082  | .               | 2 |
| ACC.GGT       | 6 | 150015219 | 150015235 | 5.66667 | .                  | .       | intergenic | 0.206  | .               | 2 |
| GAGGG.CCCTC   | 6 | 150275344 | 150275371 | 4.66667 | .                  | .       | intergenic | 0.08   | rs380873 rs7915 | 2 |
| AC.GT         | 6 | 150417271 | 150417283 | 6.5     | .                  | .       | intergenic | 0.199  | rs701838177     | 3 |
| AAAC.GTTT     | 6 | 150543481 | 150543500 | 5       | .                  | .       | intergenic | .      | rs788941513     | 2 |
| AG.CT         | 6 | 150794812 | 150794831 | 10      | .                  | .       | intergenic | .      | rs790797808     | 2 |
| AAT.ATT       | 6 | 150969175 | 150969196 | 7.33333 | .                  | .       | intergenic | 0.332  | rs793212250     | 2 |
| AAAT.ATTT     | 6 | 151062685 | 151062704 | 5       | .                  | .       | intergenic | .      | rs161469 rs7875 | 2 |
| AC.GT         | 6 | 151332132 | 151332147 | 8       | .                  | .       | intergenic | 0.356  | rs786472882     | 2 |
| AAC.GTT       | 6 | 151402929 | 151402941 | 4.33333 | .                  | .       | intergenic | .      | rs791986828     | 2 |
| AG.CT         | 6 | 151705282 | 151705291 | 5       | .                  | .       | intergenic | -0.054 | rs791021559     | 2 |
| AC.GT         | 6 | 151707249 | 151707259 | 5.5     | .                  | .       | intergenic | 1.257  | rs789220647     | 2 |
| AAAAC.GTTTT   | 6 | 151760713 | 151760730 | 3       | ENSSSCT00000004299 | .       | promoter   | 0.201  | rs346040 rs7889 | 2 |
| AAG.CTT       | 6 | 151854462 | 151854476 | 5       | .                  | .       | intergenic | 0.183  | rs792620983     | 2 |
| AAAG.CTTT     | 6 | 151973399 | 151973425 | 6.75    | ENSSSCT00000024887 | .       | intron     | .      | rs792834602     | 2 |
| AAAG.CTTT     | 6 | 151973399 | 151973425 | 6.75    | ENSSSCT00000022260 | CYP4X1  | intron     | .      | rs792834602     | 2 |
| AG.CT         | 6 | 152794076 | 152794085 | 5       | .                  | .       | intergenic | 0.991  | .               | 2 |
| AAAAC.GTTTT   | 6 | 152795203 | 152795232 | 5       | .                  | .       | intergenic | 1.046  | rs592279 rs7924 | 2 |
| AAC.GTT       | 6 | 153031251 | 153031264 | 4.66667 | .                  | .       | intergenic | .      | rs785058 rs7912 | 2 |
| AAAC.GTTT     | 6 | 153164183 | 153164203 | 5.25    | .                  | .       | intergenic | .      | rs786943066     | 2 |
| AAAAC.GTTTT   | 6 | 153362411 | 153362433 | 4.6     | ENSSSCT00000004332 | TESK2   | intron     | .      | rs761095 rs7876 | 2 |
| AAG.CTT       | 6 | 153532416 | 153532429 | 4.66667 | .                  | .       | intergenic | 0.288  | rs788382426     | 2 |
| AAAC.GTTT     | 6 | 153672127 | 153672145 | 4.75    | .                  | .       | intergenic | .      | rs792526266     | 2 |
| AT.AT         | 6 | 153857564 | 153857574 | 5.5     | ENSSSCT00000022870 | EIF2B3  | intron     | 0.249  | rs788134555     | 2 |
| AG.CT         | 6 | 153870834 | 153870850 | 8.5     | ENSSSCT00000022870 | EIF2B3  | intron     | 1.387  | rs709800826     | 2 |
| AAAG.CTTT     | 6 | 154002722 | 154002734 | 3.25    | ENSSSCT00000030222 | TMEM53  | intron     | 0.168  | rs791633225     | 2 |

|              |   |           |           |         |                    |         |            |        |               |   |
|--------------|---|-----------|-----------|---------|--------------------|---------|------------|--------|---------------|---|
| AAAG.CTTT    | 6 | 154002722 | 154002734 | 3.25    | ENSSSCT00000004347 | KIF2C   | intron     | 0.168  | rs791633225   | 2 |
| AC.GT        | 6 | 154248484 | 154248494 | 5.5     | .                  | .       | intergenic | 0.028  | .             | 2 |
| AT.AT        | 6 | 154338369 | 154338387 | 9.5     | .                  | .       | intergenic | -0.17  | 256890 rs7910 | 2 |
| AC.GT        | 6 | 154373225 | 154373238 | 7       | .                  | .       | intergenic | .      | rs788735344   | 4 |
| AAAC.GTTT    | 6 | 154824657 | 154824677 | 5.25    | .                  | .       | intergenic | 0.098  | rs787980239   | 2 |
| AG.CT        | 6 | 154918448 | 154918462 | 7.5     | ENSSSCT00000026482 | .       | intron     | 0.029  | rs791695123   | 2 |
| AAAC.GTTT    | 6 | 155382385 | 155382408 | 6       | .                  | .       | intergenic | .      | rs788529566   | 3 |
| AAAAG.CTTTT  | 6 | 155559175 | 155559200 | 5.2     | .                  | .       | intergenic | .      | rs789946111   | 3 |
| AAAC.GTTT    | 6 | 155891468 | 155891490 | 5.75    | .                  | .       | intergenic | -0.082 | rs793010068   | 2 |
| AAGG.CCTT    | 6 | 156052678 | 156052696 | 4.75    | ENSSSCT00000023375 | ERMAP   | intron     | .      | 364712 rs7864 | 2 |
| AAC.GTT      | 6 | 156056255 | 156056271 | 5.66667 | ENSSSCT00000023375 | ERMAP   | intron     | .      | rs791867563   | 2 |
| ACAG.CTGT    | 6 | 156110443 | 156110461 | 4.75    | ENSSSCT00000023375 | ERMAP   | intron     | 0.09   | rs786742833   | 2 |
| AAAAC.GTTTT  | 6 | 156142403 | 156142417 | 3       | .                  | .       | intergenic | 0.258  | 229423 rs7905 | 2 |
| AC.GT        | 6 | 156220284 | 156220296 | 6.5     | .                  | .       | intergenic | 0.198  | rs787485613   | 4 |
| AAAC.GTTT    | 6 | 156369860 | 156369878 | 4.75    | ENSSSCT00000004388 | ZMYND12 | intron     | 0.042  | 340968 rs7920 | 2 |
| AC.GT        | 6 | 157304284 | 157304295 | 6       | .                  | .       | intergenic | .      | .             | 2 |
| AAAC.GTTT    | 6 | 157704796 | 157704826 | 7.75    | ENSSSCT00000004405 | SMAP1L  | intron     | .      | 362918 rs7902 | 2 |
| AC.GT        | 7 | 141486    | 141495    | 5       | ENSSSCT00000001075 | EXOC2   | intron     | .      | rs786439632   | 3 |
| AC.GT        | 7 | 1333772   | 1333787   | 8       | ENSSSCT00000001084 | GMDS    | intron     | 0.55   | rs793576909   | 2 |
| AT.AT        | 7 | 1406746   | 1406755   | 5       | .                  | .       | intergenic | 0.058  | rs786481894   | 2 |
| AG.CT        | 7 | 1669546   | 1669557   | 6       | .                  | .       | intergenic | 0.014  | rs789839908   | 4 |
| AAAAAC.GTTTT | 7 | 2584410   | 2584439   | 5       | .                  | .       | intergenic | .      | rs791686994   | 2 |
| AAC.GTT      | 7 | 2745136   | 2745149   | 4.66667 | .                  | .       | intergenic | 0.59   | rs787563117   | 2 |
| AAAT.ATTT    | 7 | 3478394   | 3478409   | 4       | ENSSSCT00000001108 | .       | intron     | 0.043  | rs793115973   | 2 |
| AAC.GTT      | 7 | 4031400   | 4031421   | 7.33333 | ENSSSCT00000035671 | F13A1   | intron     | -0.207 | rs790658620   | 2 |
| AC.GT        | 7 | 4048436   | 4048470   | 17.5    | ENSSSCT00000035671 | F13A1   | intron     | -0.072 | rs787446570   | 4 |
| AAAC.GTTT    | 7 | 4091287   | 4091301   | 3.75    | ENSSSCT00000035671 | F13A1   | intron     | -0.032 | .             | 2 |
| AC.GT        | 7 | 4137935   | 4137956   | 11      | .                  | .       | intergenic | 0.616  | rs790993589   | 2 |
| AG.CT        | 7 | 4154815   | 4154838   | 12      | .                  | .       | intergenic | .      | 343425 rs7874 | 4 |
| AAACC.GGTTT  | 7 | 4506722   | 4506740   | 3.16667 | .                  | .       | intergenic | 0.39   | rs789392018   | 2 |
| AAAT.ATTT    | 7 | 4844338   | 4844354   | 4.25    | .                  | .       | intergenic | .      | .             | 3 |
| AAAC.GTTT    | 7 | 5131967   | 5131985   | 4.75    | .                  | .       | intergenic | 0.463  | 396336 rs7897 | 4 |
| AC.GT        | 7 | 5410383   | 5410393   | 5.5     | ENSSSCT00000001123 | .       | intron     | 0.124  | rs790644361   | 3 |
| AC.GT        | 7 | 5432175   | 5432185   | 5.5     | ENSSSCT00000027153 | .       | intron     | .      | rs793022513   | 3 |
| AAAAC.GTTTT  | 7 | 5452038   | 5452057   | 4       | ENSSSCT00000027153 | .       | intron     | -0.014 | rs787569966   | 2 |
| AAAT.ATTT    | 7 | 5489363   | 5489379   | 4.25    | .                  | .       | intergenic | 0.127  | 104015 rs7937 | 2 |
| AAAC.GTTT    | 7 | 5808764   | 5808782   | 4.75    | ENSSSCT00000001126 | SLC35B3 | intron     | 0.106  | rs792951049   | 2 |
| AG.CT        | 7 | 5835231   | 5835242   | 6       | .                  | .       | intergenic | -0.113 | rs788258949   | 2 |
| AG.CT        | 7 | 5857323   | 5857333   | 5.5     | .                  | .       | intergenic | -0.098 | rs786931576   | 2 |
| AAAT.ATTT    | 7 | 5980520   | 5980540   | 5.25    | .                  | .       | intergenic | .      | .             | 2 |
| AG.CT        | 7 | 6004186   | 6004198   | 6.5     | .                  | .       | intergenic | -0.218 | .             | 2 |
| AC.GT        | 7 | 6090436   | 6090450   | 7.5     | .                  | .       | intergenic | .      | rs790572046   | 2 |
| AAT.ATT      | 7 | 6150514   | 6150525   | 4       | .                  | .       | intergenic | 0.026  | rs791444549   | 2 |
| AC.GT        | 7 | 6237781   | 6237791   | 5.5     | .                  | .       | intergenic | 0.022  | .             | 4 |
| AT.AT        | 7 | 6343089   | 6343100   | 6       | .                  | .       | intergenic | 0.042  | rs788401865   | 4 |
| AC.GT        | 7 | 6497391   | 6497403   | 6.5     | .                  | .       | intergenic | 0.347  | rs690642460   | 4 |
| AC.GT        | 7 | 6559133   | 6559145   | 6.5     | .                  | .       | intergenic | -0.277 | .             | 2 |
| AAAAT.ATTTT  | 7 | 6575635   | 6575660   | 5.2     | .                  | .       | intergenic | -0.003 | 348879 rs7913 | 2 |
| AGAT.ATCT    | 7 | 6681731   | 6681748   | 4.5     | .                  | .       | intergenic | .      | 395198 rs7932 | 2 |
| AG.CT        | 7 | 6689599   | 6689611   | 6.5     | .                  | .       | intergenic | -0.24  | .             | 2 |
| AC.GT        | 7 | 6708791   | 6708809   | 9.5     | .                  | .       | intergenic | .      | 384847 rs7897 | 2 |
| AC.GT        | 7 | 6847369   | 6847403   | 17.5    | .                  | .       | intergenic | 0.341  | rs792419482   | 2 |
| AC.GT        | 7 | 6901035   | 6901045   | 5.5     | .                  | .       | intergenic | -0.011 | rs789110753   | 2 |
| AAC.GTT      | 7 | 6924080   | 6924095   | 5.33333 | .                  | .       | intergenic | 0.257  | 365975 rs7867 | 2 |
| AT.AT        | 7 | 7051357   | 7051366   | 5       | ENSSSCT00000001128 | OFCC1   | intron     | 0.194  | rs787311678   | 2 |
| AT.AT        | 7 | 7051357   | 7051366   | 5       | ENSSSCT00000022619 | OFCC1   | intron     | 0.194  | rs787311678   | 2 |
| AC.GT        | 7 | 7076877   | 7076887   | 5.5     | .                  | .       | intergenic | -0.165 | rs788230583   | 2 |
| AAAC.GTTT    | 7 | 7101060   | 7101072   | 3.25    | .                  | .       | intergenic | -0.033 | rs787209823   | 2 |
| AAAC.GTTT    | 7 | 7115576   | 7115603   | 7       | .                  | .       | intergenic | 0.497  | 144574 rs7912 | 2 |
| AAG.CTT      | 7 | 7123813   | 7123834   | 7.33333 | .                  | .       | intergenic | 2.922  | 366051 rs7898 | 2 |
| AAT.ATT      | 7 | 7143716   | 7143739   | 8       | .                  | .       | intergenic | .      | rs790908903   | 2 |
| AGG.CCT      | 7 | 7542088   | 7542109   | 7.33333 | ENSSSCT00000001129 | TFAP2A  | intron     | 0.433  | .             | 3 |
| AT.AT        | 7 | 7667644   | 7667655   | 6       | .                  | .       | intergenic | .      | rs789868933   | 2 |
| AAG.CTT      | 7 | 7703272   | 7703285   | 4.66667 | ENSSSCT00000001133 | GCNT2   | intron     | 0.09   | rs787400968   | 2 |
| AAAC.GTTT    | 7 | 7745888   | 7745902   | 3.75    | ENSSSCT00000001134 | C6orf52 | intron     | 0.056  | rs791917522   | 2 |
| AGG.CCT      | 7 | 8015620   | 8015639   | 6.66667 | ENSSSCT00000001139 | ELOVL2  | promoter   | 0.062  | rs787242743   | 2 |
| AC.GT        | 7 | 8336332   | 8336343   | 6       | .                  | .       | intergenic | -0.022 | rs788681979   | 4 |
| AC.GT        | 7 | 8376005   | 8376018   | 7       | .                  | .       | intergenic | 0.508  | rs787073395   | 4 |
| AAAAAC.GTTTT | 7 | 8608864   | 8608882   | 3.16667 | ENSSSCT00000001142 | .       | intron     | 0.27   | 737443 rs7876 | 2 |
| AC.GT        | 7 | 8622949   | 8622961   | 6.5     | ENSSSCT00000001142 | .       | intron     | -0.312 | .             | 3 |
| AGC.GCT      | 7 | 8720697   | 8720711   | 5       | ENSSSCT00000001141 | .       | intron     | .      | .             | 3 |
| AAAC.GTTT    | 7 | 8940167   | 8940179   | 3.25    | ENSSSCT00000001143 | HIVEP1  | intron     | -0.169 | .             | 2 |
| AAAAC.GTTTT  | 7 | 9043885   | 9043915   | 6.2     | ENSSSCT00000001143 | HIVEP1  | intron     | 0.059  | 387916 rs7911 | 2 |
| AAAC.GTTT    | 7 | 9318041   | 9318070   | 7.5     | .                  | .       | intergenic | 0.004  | 726966 rs7919 | 2 |
| AC.GT        | 7 | 9518712   | 9518725   | 7       | ENSSSCT00000001146 | .       | intron     | 0.266  | 181231 rs7925 | 2 |
| AAAAC.GTTTT  | 7 | 9533420   | 9533442   | 4.6     | ENSSSCT00000001146 | .       | intron     | 0.041  | rs786807563   | 2 |
| AT.AT        | 7 | 9778083   | 9778092   | 5       | ENSSSCT00000001146 | .       | intron     | 0.056  | rs788338746   | 2 |
| AC.GT        | 7 | 9799685   | 9799696   | 6       | ENSSSCT00000001146 | .       | intron     | 0.189  | rs792092349   | 2 |
| AT.AT        | 7 | 10295222  | 10295232  | 5.5     | ENSSSCT00000001150 | RANBP9  | intron     | 0.077  | rs788455633   | 3 |
| AAAAC.GTTTT  | 7 | 10508926  | 10508946  | 4.2     | .                  | .       | intergenic | 0.016  | 146755 rs7893 | 2 |
| AAAT.ATTT    | 7 | 10547710  | 10547732  | 5.75    | .                  | .       | intergenic | 0.33   | rs787864141   | 2 |
| AAAT.ATTT    | 7 | 10553874  | 10553900  | 6.75    | ENSSSCT00000001151 | MCUR1   | intron     | -0.17  | 327776 rs7909 | 2 |
| AC.GT        | 7 | 10697717  | 10697728  | 6       | ENSSSCT00000033515 | CD83    | intron     | 0.189  | .             | 2 |
| AAAAC.GTTTT  | 7 | 10739020  | 10739054  | 7       | ENSSSCT00000033515 | CD83    | intron     | 0.012  | rs788033772   | 2 |

|               |   |          |          |         |                    |         |            |        |                 |   |
|---------------|---|----------|----------|---------|--------------------|---------|------------|--------|-----------------|---|
| AC.GT         | 7 | 10786245 | 10786254 | 5       | ENSSSCT00000033515 | CD83    | intron     | -0.099 | rs789670384     | 2 |
| AAC.GTT       | 7 | 11346345 | 11346364 | 6.66667 | .                  | .       | intergenic | 0.097  | rs790192069     | 2 |
| AG.CT         | 7 | 11490878 | 11490894 | 8.5     | .                  | .       | intergenic | 0.058  | rs789136086     | 2 |
| AAAT.ATTT     | 7 | 11611882 | 11611900 | 4.75    | .                  | .       | intergenic | .      | rs66358 rs7907  | 2 |
| AAAAAG.CTTTTT | 7 | 11784381 | 11784402 | 3.66667 | .                  | .       | intergenic | .      | rs792869996     | 2 |
| AAAC.GTTT     | 7 | 11829126 | 11829140 | 3.75    | .                  | .       | intergenic | -0.02  | rs786542311     | 2 |
| AAC.GTT       | 7 | 12204856 | 12204881 | 8.66667 | ENSSSCT00000001157 | DTNBP1  | intron     | -0.531 | rs786478051     | 2 |
| AAT.ATT       | 7 | 12414854 | 12414875 | 7.33333 | .                  | .       | intergenic | 0.29   | .               | 2 |
| AAAC.GTTT     | 7 | 12416480 | 12416502 | 5.75    | .                  | .       | intergenic | 0.067  | .               | 2 |
| AAAAC.GTTTT   | 7 | 12465578 | 12465602 | 5       | .                  | .       | intergenic | -0.007 | .               | 2 |
| AAAC.GTTT     | 7 | 12591077 | 12591092 | 4       | .                  | .       | intergenic | -0.101 | rs787683444     | 2 |
| ACC.GGT       | 7 | 12637988 | 12638002 | 5       | .                  | .       | intergenic | -0.07  | .               | 2 |
| AAAG.CTTT     | 7 | 12664395 | 12664411 | 4.25    | .                  | .       | intergenic | -0.046 | rs793545452     | 3 |
| AAAAT.ATTTT   | 7 | 12685053 | 12685081 | 5.8     | .                  | .       | intergenic | -0.138 | rs789074809     | 2 |
| AC.GT         | 7 | 12766383 | 12766395 | 6.5     | .                  | .       | intergenic | -0.024 | rs788872084     | 2 |
| AACC.GGTT     | 7 | 12849643 | 12849663 | 5.25    | ENSSSCT00000001159 | GMPR    | promoter   | 0.089  | .               | 2 |
| AG.CT         | 7 | 12917192 | 12917201 | 5       | ENSSSCT00000001160 | ATXN1   | intron     | 0.383  | rs792510451     | 2 |
| AT.AT         | 7 | 13008037 | 13008048 | 6       | .                  | .       | intergenic | -0.292 | rs790438140     | 2 |
| AAAT.ATTT     | 7 | 13211651 | 13211664 | 3.5     | .                  | .       | intergenic | -0.048 | rs789514160     | 2 |
| AG.CT         | 7 | 13216669 | 13216679 | 5.5     | .                  | .       | intergenic | 0.222  | rs791619677     | 2 |
| AAAAG.CTTTT   | 7 | 13413337 | 13413359 | 4.6     | .                  | .       | intergenic | 0.236  | rs788567552     | 2 |
| AAT.ATT       | 7 | 13632626 | 13632637 | 4       | .                  | .       | intergenic | 0.048  | rs792019751     | 2 |
| AT.AT         | 7 | 13644961 | 13644973 | 6.5     | .                  | .       | intergenic | .      | rs702721440     | 2 |
| AATC.GATT     | 7 | 13713501 | 13713528 | 7       | .                  | .       | intergenic | 0.024  | .               | 2 |
| AC.GT         | 7 | 13773624 | 13773646 | 11.5    | .                  | .       | intergenic | -0.318 | rs787259881     | 4 |
| AAAC.GTTT     | 7 | 13795499 | 13795519 | 5.25    | .                  | .       | intergenic | 0.017  | rs787137628     | 2 |
| AT.AT         | 7 | 14016199 | 14016208 | 5       | ENSSSCT00000001163 | .       | intron     | -0.05  | .               | 4 |
| AAAC.GTTT     | 7 | 14028128 | 14028142 | 3.75    | ENSSSCT00000001163 | .       | intron     | -0.168 | rs790323091     | 3 |
| AC.GT         | 7 | 14033920 | 14033931 | 6       | ENSSSCT00000001163 | .       | intron     | 0.414  | .               | 2 |
| AAT.ATT       | 7 | 14060161 | 14060185 | 8.33333 | .                  | .       | intergenic | -0.19  | rs22734 rs7921  | 2 |
| AAAG.CTTT     | 7 | 14074326 | 14074341 | 4       | .                  | .       | intergenic | .      | rs786289802     | 2 |
| AAAC.GTTT     | 7 | 14084643 | 14084661 | 4.75    | ENSSSCT00000001165 | FAM8A1  | intron     | .      | rs286458 rs7883 | 2 |
| AG.CT         | 7 | 14312392 | 14312403 | 6       | .                  | .       | intergenic | 0.158  | .               | 2 |
| AT.AT         | 7 | 14312588 | 14312597 | 5       | .                  | .       | intergenic | 0.134  | .               | 3 |
| AAAAG.CTTTT   | 7 | 14448421 | 14448450 | 6       | .                  | .       | intergenic | 0.141  | rs791901855     | 2 |
| ACAG.CTGT     | 7 | 14567486 | 14567508 | 5.75    | ENSSSCT00000001168 | TPMT    | intron     | -0.177 | rs759863 rs7901 | 2 |
| AAAT.ATTT     | 7 | 14725008 | 14725026 | 4.75    | .                  | .       | intergenic | .      | rs786551428     | 2 |
| AG.CT         | 7 | 14798617 | 14798659 | 21.5    | ENSSSCT00000001171 | RNF144B | intron     | 0.278  | .               | 3 |
| AC.GT         | 7 | 14799316 | 14799325 | 5       | ENSSSCT00000001171 | RNF144B | intron     | 0.514  | rs792671403     | 2 |
| AC.GT         | 7 | 14863193 | 14863207 | 7.5     | .                  | .       | intergenic | 0.142  | rs790388552     | 2 |
| AG.CT         | 7 | 15138452 | 15138462 | 5.5     | .                  | .       | intergenic | -0.043 | rs691623607     | 2 |
| AAAAAC.GTTTTT | 7 | 15293372 | 15293394 | 3.83333 | .                  | .       | intergenic | 0.231  | rs792378113     | 2 |
| AAAT.ATTT     | 7 | 15357283 | 15357304 | 5.5     | .                  | .       | intergenic | -0.004 | .               | 4 |
| ACAG.CTGT     | 7 | 15466234 | 15466245 | 3       | .                  | .       | intergenic | -0.114 | .               | 2 |
| AT.AT         | 7 | 15524752 | 15524763 | 6       | .                  | .       | intergenic | 0.12   | rs690528146     | 4 |
| AG.CT         | 7 | 15613852 | 15613867 | 8       | .                  | .       | intergenic | .      | rs706772144     | 2 |
| ACAG.CTGT     | 7 | 15696501 | 15696523 | 5.75    | .                  | .       | intergenic | .      | rs786741496     | 2 |
| AAAT.ATTT     | 7 | 15727715 | 15727733 | 4.75    | .                  | .       | intergenic | .      | rs356415 rs7890 | 2 |
| AAAC.GTTT     | 7 | 15955463 | 15955480 | 4.5     | .                  | .       | intergenic | 0.201  | rs791464361     | 2 |
| AC.GT         | 7 | 16078644 | 16078661 | 9       | .                  | .       | intergenic | .      | .               | 2 |
| AG.CT         | 7 | 16172633 | 16172642 | 5       | .                  | .       | intergenic | 0.07   | .               | 2 |
| AAC.GTT       | 7 | 16355848 | 16355870 | 7.66667 | .                  | .       | intergenic | 3.405  | rs381033 rs7906 | 2 |
| AAAC.GTTT     | 7 | 16483057 | 16483076 | 5       | ENSSSCT00000001173 | MBOAT1  | intron     | .      | .               | 2 |
| ATCC.GGAT     | 7 | 16509195 | 16509213 | 4.75    | ENSSSCT00000001173 | MBOAT1  | intron     | .      | rs793468022     | 2 |
| AAAAT.ATTTT   | 7 | 16524476 | 16524497 | 4.4     | ENSSSCT00000001173 | MBOAT1  | intron     | -0.01  | rs789357960     | 2 |
| AAAT.ATTT     | 7 | 16672568 | 16672583 | 4       | .                  | .       | intergenic | 0.161  | rs793172800     | 2 |
| AAAT.ATTT     | 7 | 16680507 | 16680520 | 3.5     | .                  | .       | intergenic | -0.039 | rs790209621     | 2 |
| AC.GT         | 7 | 16719914 | 16719923 | 5       | .                  | .       | intergenic | -0.181 | rs29182 rs7900  | 4 |
| AAAT.ATTT     | 7 | 16760412 | 16760448 | 9.25    | .                  | .       | intergenic | 0.336  | rs793344903     | 2 |
| AC.GT         | 7 | 16830665 | 16830676 | 6       | ENSSSCT00000001175 | CDKAL1  | intron     | 0.184  | rs790353822     | 2 |
| AG.CT         | 7 | 17025319 | 17025331 | 6.5     | ENSSSCT00000001175 | CDKAL1  | intron     | -0.105 | rs788267200     | 2 |
| AAC.GTT       | 7 | 17163453 | 17163469 | 5.66667 | ENSSSCT00000001175 | CDKAL1  | intron     | 0.749  | rs340639 rs7876 | 3 |
| AAAAT.ATTTT   | 7 | 17191305 | 17191329 | 5       | ENSSSCT00000001175 | CDKAL1  | intron     | .      | rs355331 rs7890 | 2 |
| AG.CT         | 7 | 17530672 | 17530688 | 8.5     | .                  | .       | intergenic | .      | .               | 4 |
| AGG.CCT       | 7 | 17808718 | 17808736 | 6.33333 | .                  | .       | intergenic | 0.037  | rs791498373     | 2 |
| AAAAAG.CTTTTT | 7 | 17837621 | 17837642 | 3.66667 | .                  | .       | intergenic | -0.024 | rs788312506     | 2 |
| AAGG.CCTT     | 7 | 18156300 | 18156317 | 4.5     | .                  | .       | intergenic | 0.095  | rs786219103     | 2 |
| AAAC.GTTT     | 7 | 18198629 | 18198651 | 5.75    | .                  | .       | intergenic | -0.282 | rs786871935     | 2 |
| AC.GT         | 7 | 18215943 | 18215955 | 6.5     | .                  | .       | intergenic | 0.242  | rs786715761     | 2 |
| AC.GT         | 7 | 18278150 | 18278174 | 12.5    | .                  | .       | intergenic | -0.175 | rs793074234     | 3 |
| AC.GT         | 7 | 18407511 | 18407525 | 7.5     | .                  | .       | intergenic | 0.054  | rs791254620     | 2 |
| AT.AT         | 7 | 18548909 | 18548921 | 6.5     | .                  | .       | intergenic | -0.035 | rs695308618     | 4 |
| AAAC.GTTT     | 7 | 18553887 | 18553904 | 4.5     | .                  | .       | intergenic | 0.415  | rs789893385     | 2 |
| AAC.GTT       | 7 | 18588213 | 18588231 | 6.33333 | .                  | .       | intergenic | -0.127 | rs155692 rs7937 | 2 |
| AT.AT         | 7 | 18623423 | 18623439 | 8.5     | .                  | .       | intergenic | 0.076  | rs787043206     | 2 |
| AC.GT         | 7 | 18643615 | 18643624 | 5       | .                  | .       | intergenic | -0.096 | rs382976 rs7862 | 4 |
| AG.CT         | 7 | 18736467 | 18736492 | 13      | .                  | .       | intergenic | -0.006 | rs141216 rs7921 | 2 |
| AATG.CATT     | 7 | 18814139 | 18814150 | 3       | .                  | .       | intergenic | 0.111  | .               | 3 |
| ACAT.ATGT     | 7 | 18858781 | 18858802 | 5.5     | .                  | .       | intergenic | -0.19  | rs786524988     | 2 |
| AG.CT         | 7 | 18934479 | 18934507 | 14.5    | .                  | .       | intergenic | -0.106 | rs792514928     | 2 |
| AAAC.GTTT     | 7 | 19119708 | 19119723 | 4       | .                  | .       | intergenic | .      | rs791086713     | 2 |
| AG.CT         | 7 | 19252430 | 19252441 | 6       | .                  | .       | intergenic | -0.125 | rs787706122     | 2 |
| AAAC.GTTT     | 7 | 19771893 | 19771905 | 3.25    | .                  | .       | intergenic | 0.126  | rs791020210     | 2 |
| AC.GT         | 7 | 19963387 | 19963407 | 10.5    | .                  | .       | intergenic | 0.033  | rs793491993     | 2 |

|             |   |          |          |         |                    |          |            |        |                 |   |
|-------------|---|----------|----------|---------|--------------------|----------|------------|--------|-----------------|---|
| AAG.CTT     | 7 | 20028740 | 20028754 | 5       | .                  | .        | intergenic | .      | rs787559250     | 2 |
| AG.CT       | 7 | 20085383 | 20085395 | 6.5     | .                  | .        | intergenic | -0.027 | .               | 4 |
| AAAAC.GTTTT | 7 | 20179329 | 20179348 | 4       | .                  | .        | intergenic | .      | rs788934363     | 2 |
| AC.GT       | 7 | 20195229 | 20195239 | 5.5     | .                  | .        | intergenic | 0.072  | rs788112684     | 2 |
| AAAAC.GTTTT | 7 | 20333175 | 20333190 | 3.2     | ENSSSCT00000033956 | DCDC2    | intron     | -0.278 | .               | 3 |
| AAAAC.GTTTT | 7 | 20333175 | 20333190 | 3.2     | ENSSSCT00000001180 | DCDC2    | intron     | -0.278 | .               | 3 |
| AAAAC.GTTTT | 7 | 20333175 | 20333190 | 3.2     | ENSSSCT00000022214 | 5S_rRNA  | promoter   | -0.278 | .               | 3 |
| AAAAG.CTTTT | 7 | 20346143 | 20346158 | 3.2     | ENSSSCT00000033956 | DCDC2    | intron     | 0.106  | rs792205789     | 2 |
| AAAAC.CTTTT | 7 | 20346143 | 20346158 | 3.2     | ENSSSCT00000001180 | DCDC2    | intron     | 0.106  | rs792205789     | 2 |
| AC.GT       | 7 | 20353021 | 20353031 | 5.5     | ENSSSCT00000033956 | DCDC2    | intron     | 0.104  | rs702350524     | 2 |
| AC.GT       | 7 | 20353021 | 20353031 | 5.5     | ENSSSCT00000001180 | DCDC2    | intron     | 0.104  | rs702350524     | 2 |
| AC.GT       | 7 | 20398625 | 20398647 | 11.5    | ENSSSCT00000001183 | MRS2     | intron     | 0.034  | rs41571 rs7906  | 2 |
| AC.GT       | 7 | 20398625 | 20398647 | 11.5    | ENSSSCT00000019917 | SNORA11  | promoter   | 0.034  | rs41571 rs7906  | 2 |
| AC.GT       | 7 | 20413967 | 20413977 | 5.5     | ENSSSCT00000001183 | MRS2     | intron     | .      | rs793666164     | 2 |
| AT.AT       | 7 | 20484802 | 20484814 | 6.5     | ENSSSCT00000001185 | GPLD1    | intron     | -0.087 | rs793387443     | 2 |
| AAAAC.GTTTT | 7 | 20632025 | 20632049 | 5       | .                  | .        | intergenic | 0.089  | rs306321 rs7880 | 2 |
| AAAC.GTTT   | 7 | 20854796 | 20854809 | 3.5     | ENSSSCT00000001193 | FAM65B   | intron     | 0.401  | rs234407 rs7900 | 2 |
| AT.AT       | 7 | 20923331 | 20923341 | 5.5     | .                  | .        | intergenic | -0.025 | rs790602223     | 3 |
| AAAAC.GTTTT | 7 | 20928477 | 20928496 | 4       | .                  | .        | intergenic | 0.243  | rs793858319     | 3 |
| AAT.ATT     | 7 | 20963840 | 20963853 | 4.66667 | .                  | .        | intergenic | .      | .               | 2 |
| AATC.GATT   | 7 | 21135552 | 21135579 | 7       | .                  | .        | intergenic | .      | rs787593181     | 2 |
| AT.AT       | 7 | 21297140 | 21297153 | 7       | .                  | .        | intergenic | 0.068  | rs790417878     | 2 |
| AAC.GTT     | 7 | 21529494 | 21529522 | 9.66667 | ENSSSCT00000001196 | LRRC16A  | intron     | 0.131  | rs712248884     | 4 |
| AC.GT       | 7 | 21530008 | 21530019 | 6       | ENSSSCT00000001196 | LRRC16A  | intron     | 0.888  | rs754523 rs7901 | 2 |
| AAAC.GTTT   | 7 | 21958348 | 21958382 | 8.75    | .                  | .        | intergenic | -0.169 | rs168779 rs7920 | 2 |
| AAC.GTT     | 7 | 22076620 | 22076633 | 4.66667 | .                  | .        | intergenic | -0.024 | rs334780 rs7896 | 2 |
| AAAAC.GTTTT | 7 | 22406727 | 22406750 | 4.8     | .                  | .        | intergenic | .      | rs206016 rs7911 | 2 |
| AAAC.GTTT   | 7 | 22496594 | 22496616 | 5.75    | .                  | .        | intergenic | .      | rs792390872     | 2 |
| AAC.GTT     | 7 | 22497519 | 22497532 | 4.66667 | .                  | .        | intergenic | .      | rs786760082     | 2 |
| AAAC.GTTT   | 7 | 22984362 | 22984383 | 5.5     | .                  | .        | intergenic | 0.019  | rs226477 rs7914 | 2 |
| AAAC.GTTT   | 7 | 23201303 | 23201329 | 6.75    | .                  | .        | intergenic | .      | rs786313812     | 2 |
| AAAG.CTTT   | 7 | 23218063 | 23218096 | 8.5     | .                  | .        | intergenic | .      | rs786816087     | 2 |
| AGG.CCT     | 7 | 23292184 | 23292202 | 6.33333 | .                  | .        | intergenic | .      | rs392268 rs7879 | 2 |
| AG.CT       | 7 | 23328086 | 23328102 | 8.5     | .                  | .        | intergenic | .      | .               | 2 |
| AAT.ATT     | 7 | 24035365 | 24035376 | 4       | ENSSSCT00000001302 | .        | promoter   | 0.338  | .               | 2 |
| AAAG.CTTT   | 7 | 24193472 | 24193509 | 9.5     | .                  | .        | intergenic | .      | rs398431 rs7878 | 2 |
| AAAT.ATTT   | 7 | 24206070 | 24206093 | 6       | .                  | .        | intergenic | -0.194 | rs395276 rs7935 | 2 |
| AAAC.GTTT   | 7 | 24207644 | 24207657 | 3.5     | .                  | .        | intergenic | -0.129 | rs787823562     | 2 |
| AT.AT       | 7 | 24453527 | 24453537 | 5.5     | ENSSSCT00000001317 | TRIM27   | promoter   | .      | .               | 4 |
| AAAT.ATTT   | 7 | 24824478 | 24824515 | 9.5     | .                  | .        | intergenic | .      | rs704523262     | 2 |
| AC.GT       | 7 | 25386286 | 25386307 | 11      | ENSSSCT00000030258 | U6       | promoter   | .      | rs791148392     | 4 |
| AT.AT       | 7 | 26308177 | 26308189 | 6.5     | .                  | .        | intergenic | .      | rs309324 rs7915 | 2 |
| AC.GT       | 7 | 26767113 | 26767125 | 6.5     | .                  | .        | intergenic | .      | rs791851405     | 2 |
| AC.GT       | 7 | 26989700 | 26989716 | 8.5     | ENSSSCT00000034652 | IER3     | promoter   | 0.017  | rs790175622     | 2 |
| AC.GT       | 7 | 26989700 | 26989716 | 8.5     | ENSSSCT00000031071 | IER3     | promoter   | 0.017  | rs790175622     | 2 |
| AT.AT       | 7 | 27324551 | 27324562 | 6       | .                  | .        | intergenic | .      | rs793204991     | 2 |
| AAACC.GGTTT | 7 | 27330337 | 27330365 | 5.8     | .                  | .        | intergenic | .      | rs295739 rs7930 | 2 |
| AC.GT       | 7 | 27342765 | 27342784 | 10      | .                  | .        | intergenic | .      | rs144196 rs7864 | 2 |
| AAC.GTT     | 7 | 27612952 | 27612975 | 8       | ENSSSCT00000034604 | SLA-7    | promoter   | -0.874 | rs340367 rs7865 | 2 |
| AAC.GTT     | 7 | 27612952 | 27612975 | 8       | ENSSSCT00000034735 | SLA-7    | promoter   | -0.874 | rs340367 rs7865 | 2 |
| AAC.GTT     | 7 | 27612952 | 27612975 | 8       | ENSSSCT00000035823 | SLA-7    | promoter   | -0.874 | rs340367 rs7865 | 2 |
| AAC.GTT     | 7 | 27612952 | 27612975 | 8       | ENSSSCT00000001524 | SLA-7    | promoter   | -0.874 | rs340367 rs7865 | 2 |
| AAC.GTT     | 7 | 27612952 | 27612975 | 8       | ENSSSCT00000001336 | SLA-7    | promoter   | -0.874 | rs340367 rs7865 | 2 |
| AAC.GTT     | 7 | 27612952 | 27612975 | 8       | ENSSSCT00000035331 | SLA-7    | promoter   | -0.874 | rs340367 rs7865 | 2 |
| AAAG.CTTT   | 7 | 27731115 | 27731133 | 4.75    | ENSSSCT00000001570 | C4A      | intron     | -0.296 | rs378311 rs7896 | 2 |
| AC.GT       | 7 | 28033052 | 28033066 | 7.5     | ENSSSCT00000001583 | AGPAT1   | intron     | -0.001 | rs789711840     | 3 |
| AC.GT       | 7 | 28033052 | 28033066 | 7.5     | ENSSSCT00000035347 | AGPAT1   | intron     | -0.001 | rs789711840     | 3 |
| AC.GT       | 7 | 28033052 | 28033066 | 7.5     | ENSSSCT00000036330 | AGPAT1   | intron     | -0.001 | rs789711840     | 3 |
| AC.GT       | 7 | 28033052 | 28033066 | 7.5     | ENSSSCT00000033826 | AGPAT1   | intron     | -0.001 | rs789711840     | 3 |
| AC.GT       | 7 | 28033052 | 28033066 | 7.5     | ENSSSCT00000035535 | AGPAT1   | intron     | -0.001 | rs789711840     | 3 |
| AC.GT       | 7 | 28033052 | 28033066 | 7.5     | ENSSSCT00000033020 | AGPAT1   | intron     | -0.001 | rs789711840     | 3 |
| AC.GT       | 7 | 29180254 | 29180264 | 5.5     | ENSSSCT00000034363 | SLA-DQB2 | promoter   | -0.079 | rs397584 rs7936 | 2 |
| AC.GT       | 7 | 29918137 | 29918148 | 6       | ENSSSCT00000001649 | BMP5     | intron     | 0.202  | rs381700 rs7877 | 2 |
| AAG.CTT     | 7 | 30021904 | 30021917 | 4.66667 | .                  | .        | intergenic | 0.577  | rs768426 rs7871 | 2 |
| AG.CT       | 7 | 30047304 | 30047318 | 7.5     | .                  | .        | intergenic | .      | rs693921366     | 4 |
| AAAC.GTTT   | 7 | 30107579 | 30107605 | 6.75    | .                  | .        | intergenic | 0.024  | rs774541 rs7893 | 2 |
| ACT.AGT     | 7 | 30496872 | 30496913 | 14      | .                  | .        | intergenic | -0.041 | rs136151 rs7887 | 2 |
| AAAAG.CTTTT | 7 | 30611200 | 30611223 | 4       | ENSSSCT00000001655 | FAM83B   | promoter   | 0.01   | rs790534615     | 2 |
| AG.CT       | 7 | 30667308 | 30667322 | 7.5     | .                  | .        | intergenic | 0.083  | .               | 3 |
| AAAT.ATTT   | 7 | 30687473 | 30687495 | 5.75    | .                  | .        | intergenic | 0.025  | .               | 2 |
| AT.AT       | 7 | 30729590 | 30729600 | 5.5     | .                  | .        | intergenic | .      | rs788006516     | 2 |
| CACAG.CTGTG | 7 | 30815255 | 30815276 | 3.66667 | .                  | .        | intergenic | 0.036  | rs793290575     | 2 |
| AAAC.GTTT   | 7 | 30930684 | 30930712 | 7.25    | .                  | .        | intergenic | 0.063  | rs788175492     | 2 |
| AC.GT       | 7 | 31035723 | 31035732 | 5       | .                  | .        | intergenic | .      | rs691303695     | 2 |
| AT.AT       | 7 | 31178650 | 31178661 | 6       | .                  | .        | intergenic | .      | rs693563455     | 2 |
| AC.GT       | 7 | 31217113 | 31217123 | 5.5     | .                  | .        | intergenic | -0.086 | rs786307573     | 3 |
| AAG.CTT     | 7 | 31338561 | 31338574 | 4.66667 | ENSSSCT00000001658 | LRRC1    | intron     | -0.018 | rs791129679     | 2 |
| AAG.CTT     | 7 | 31338561 | 31338574 | 4.66667 | ENSSSCT00000035077 | LRRC1    | intron     | -0.018 | rs791129679     | 2 |
| AAAC.GTTT   | 7 | 31345310 | 31345324 | 3.75    | ENSSSCT00000001658 | LRRC1    | intron     | 1.204  | rs391858 rs7863 | 2 |
| AAAC.GTTT   | 7 | 31345310 | 31345324 | 3.75    | ENSSSCT00000035077 | LRRC1    | intron     | 1.204  | rs391858 rs7863 | 2 |
| AAG.CTT     | 7 | 31364950 | 31364978 | 9.66667 | ENSSSCT00000001658 | LRRC1    | intron     | 0.133  | rs787503452     | 2 |
| AT.AT       | 7 | 31475386 | 31475396 | 5.5     | .                  | .        | intergenic | .      | rs791843000     | 2 |
| AAAT.ATTT   | 7 | 31672571 | 31672588 | 4.5     | .                  | .        | intergenic | 0.197  | .               | 2 |
| AC.GT       | 7 | 31927718 | 31927729 | 6       | .                  | .        | intergenic | -0.035 | rs124323 rs7908 | 2 |

|             |   |          |          |         |                     |          |            |        |                 |   |
|-------------|---|----------|----------|---------|---------------------|----------|------------|--------|-----------------|---|
| AG.CT       | 7 | 32003793 | 32003804 | 6       | ENSSSCT00000001662  | KHDRBS2  | intron     | 0.032  | rs708215496     | 3 |
| AAAAT.ATTTT | 7 | 32251260 | 32251278 | 3.8     | ENSSSCT00000001662  | KHDRBS2  | intron     | 0.307  | rs792943635     | 2 |
| AAAG.CTTT   | 7 | 32282712 | 32282740 | 7.25    | ENSSSCT00000001662  | KHDRBS2  | intron     | 0.006  | rs793623095     | 2 |
| AAC.GTT     | 7 | 32283886 | 32283897 | 4       | ENSSSCT00000001662  | KHDRBS2  | intron     | 0.074  | .               | 2 |
| AAAAC.GTTTT | 7 | 32287437 | 32287470 | 6.8     | ENSSSCT00000001662  | KHDRBS2  | intron     | 0.024  | rs790538024     | 3 |
| AAAC.GTTT   | 7 | 32606104 | 32606129 | 6.5     | .                   | .        | intergenic | 0.036  | rs38071 rs7902  | 2 |
| AC.GT       | 7 | 32956636 | 32956647 | 6       | ENSSSCT00000001665  | .        | intron     | .      | rs790137445     | 3 |
| AAAC.GTTT   | 7 | 33085156 | 33085170 | 3.75    | .                   | .        | intergenic | 0.159  | rs789452636     | 2 |
| AT.AT       | 7 | 33152415 | 33152427 | 6.5     | ENSSSCT00000001669  | ZNF451   | intron     | .      | .               | 2 |
| AAAC.GTTT   | 7 | 33296481 | 33296493 | 3.25    | ENSSSCT00000027614  | .        | intron     | 0.042  | rs787568404     | 2 |
| AC.GT       | 7 | 33300385 | 33300397 | 6.5     | ENSSSCT00000027614  | .        | intron     | 0.272  | rs789053295     | 3 |
| AAAAT.ATTTT | 7 | 33363364 | 33363396 | 6.6     | ENSSSCT00000027614  | .        | intron     | -0.218 | rs793153182     | 2 |
| AAAT.ATTT   | 7 | 33931712 | 33931732 | 5.25    | ENSSSCT00000001673  | COL21A1  | intron     | 0.508  | rs789082287     | 2 |
| AAAGC.GCTTT | 7 | 33992799 | 33992820 | 3.66667 | ENSSSCT00000001673  | COL21A1  | intron     | 2.507  | .               | 2 |
| ATC.GAT     | 7 | 34019373 | 34019388 | 5.33333 | .                   | .        | intergenic | .      | rs788263076     | 2 |
| AC.GT       | 7 | 34162365 | 34162380 | 8       | ENSSSCT00000001679  | RGL2     | intron     | 0.698  | rs789752821     | 2 |
| AC.GT       | 7 | 34196564 | 34196580 | 8.5     | ENSSSCT00000001683  | .        | promoter   | .      | rs789752821     | 2 |
| AT.AT       | 7 | 34525207 | 34525219 | 6.5     | ENSSSCT00000030529  | UQC22    | intron     | .      | rs789596352     | 2 |
| AATG.CATT   | 7 | 34875026 | 34875053 | 7       | ENSSSCT00000001696  | GRM4     | intron     | -0.067 | rs80977 rs7905  | 2 |
| AT.AT       | 7 | 35514892 | 35514913 | 11      | ENSSSCT00000001707  | UHRF1BP1 | intron     | 0.152  | rs63152 rs7903  | 2 |
| AAAAC.GTTTT | 7 | 36150545 | 36150568 | 4.8     | ENSSSCT00000001714  | PPARD    | intron     | .      | rs792933705     | 2 |
| AAAC.GTTT   | 7 | 36307815 | 36307827 | 3.25    | .                   | .        | intergenic | .      | rs793712938     | 2 |
| AAAC.GTTT   | 7 | 36309169 | 36309185 | 4.25    | .                   | .        | intergenic | 0.042  | rs793712938     | 2 |
| AT.AT       | 7 | 36332078 | 36332087 | 5       | .                   | .        | intergenic | 0.289  | rs789234251     | 3 |
| AC.GT       | 7 | 36501047 | 36501063 | 8.5     | .                   | .        | intergenic | 0.073  | rs787270603     | 2 |
| AC.GT       | 7 | 37241843 | 37241858 | 8       | .                   | .        | intergenic | -0.314 | rs787270603     | 2 |
| AG.CT       | 7 | 37392954 | 37392963 | 5       | ENSSSCT00000001746  | CPNE5    | intron     | -0.242 | rs791538642     | 2 |
| AC.GT       | 7 | 37450177 | 37450190 | 7       | ENSSSCT00000028714  | PPIL1    | promoter   | .      | rs791513936     | 2 |
| AC.GT       | 7 | 37450177 | 37450190 | 7       | ENSSSCT00000001748  | C6orf89  | promoter   | .      | rs791513936     | 2 |
| AG.CT       | 7 | 37462933 | 37462942 | 5       | ENSSSCT00000001748  | C6orf89  | intron     | 2.163  | rs787595822     | 3 |
| AT.AT       | 7 | 37957294 | 37957303 | 5       | ENSSSCT00000001758  | .        | intron     | .      | rs791495289     | 3 |
| AAC.GTT     | 7 | 38019424 | 38019451 | 9.33333 | .                   | .        | intergenic | -0.073 | .               | 3 |
| AAAC.GTTT   | 7 | 38064266 | 38064280 | 3.75    | .                   | .        | intergenic | .      | rs694927431     | 3 |
| AAC.GTT     | 7 | 38212286 | 38212302 | 5.66667 | .                   | .        | intergenic | 0.24   | rs32366 rs7903  | 2 |
| ACAT.ATGT   | 7 | 38850068 | 38850090 | 5.75    | ENSSSCT00000001764  | .        | intron     | 0.046  | rs792516526     | 2 |
| AC.GT       | 7 | 38934485 | 38934498 | 7       | .                   | .        | intergenic | 0.075  | .               | 3 |
| AC.GT       | 7 | 38982481 | 38982493 | 6.5     | ENSSSCT00000026749  | BTBD9    | intron     | 0.131  | rs49742 rs7882  | 2 |
| AAAAC.GTTTT | 7 | 39374338 | 39374362 | 5       | ENSSSCT00000001768  | DNAH8    | intron     | 0.056  | rs217261 rs7865 | 2 |
| AT.AT       | 7 | 39448720 | 39448736 | 8.5     | ENSSSCT00000001768  | DNAH8    | intron     | -0.096 | rs792135154     | 3 |
| AAAC.GTTT   | 7 | 39466142 | 39466172 | 7.75    | ENSSSCT00000001768  | DNAH8    | intron     | 2.025  | rs91472 rs7930  | 2 |
| AAAAC.GTTTT | 7 | 39489154 | 39489173 | 4       | ENSSSCT00000001768  | DNAH8    | intron     | -0.271 | rs788186435     | 2 |
| AT.AT       | 7 | 39603051 | 39603062 | 6       | ENSSSCT00000001769  | GLP1R    | intron     | -0.157 | rs698989796     | 2 |
| AAAT.ATTT   | 7 | 39645056 | 39645074 | 4.75    | .                   | .        | intergenic | 0.129  | rs73396 rs7889  | 2 |
| AAAC.GTTT   | 7 | 39661167 | 39661181 | 3.75    | .                   | .        | intergenic | .      | rs786623952     | 2 |
| AAAAC.GTTTT | 7 | 39662418 | 39662432 | 3       | .                   | .        | intergenic | 0.148  | rs786394230     | 2 |
| AAT.ATT     | 7 | 39766859 | 39766873 | 5       | .                   | .        | intergenic | .      | rs792851490     | 2 |
| AAAC.GTTT   | 7 | 40069540 | 40069558 | 4.75    | ENSSSCT00000001774  | KIF6     | intron     | 2.713  | rs160206 rs7905 | 2 |
| AC.GT       | 7 | 40213384 | 40213396 | 6.5     | .                   | .        | intergenic | 0.042  | .               | 3 |
| AC.GT       | 7 | 40428794 | 40428812 | 9.5     | ENSSSCT00000001776  | MOCS1    | intron     | 0.301  | rs141187 rs7936 | 2 |
| AATT.AATT   | 7 | 40529395 | 40529412 | 4.5     | .                   | .        | intergenic | .      | rs39369 rs7916  | 2 |
| AAAC.GTTT   | 7 | 40532592 | 40532611 | 5       | .                   | .        | intergenic | .      | rs24363 rs7916  | 2 |
| AGG.CCT     | 7 | 40533291 | 40533305 | 5       | .                   | .        | intergenic | .      | rs72345 rs7917  | 2 |
| AAAC.GTTT   | 7 | 40552978 | 40552993 | 4       | .                   | .        | intergenic | .      | .               | 2 |
| AC.GT       | 7 | 40909564 | 40909575 | 6       | ENSSSCT00000001777  | LRFN2    | intron     | -0.334 | rs789335130     | 2 |
| AG.CT       | 7 | 40967916 | 40967929 | 7       | .                   | .        | intergenic | .      | rs793741467     | 2 |
| AAAT.ATTT   | 7 | 41524081 | 41524099 | 4.75    | .                   | .        | intergenic | -0.055 | rs788744413     | 2 |
| AAAG.CTTT   | 7 | 41708556 | 41708568 | 3.25    | ENSSSCT00000001792  | .        | intron     | -0.015 | rs793812660     | 2 |
| AAAG.CTTT   | 7 | 41708556 | 41708568 | 3.25    | ENSSSCT000000030920 | .        | intron     | -0.015 | rs793812660     | 2 |
| AAAG.CTTT   | 7 | 41708556 | 41708568 | 3.25    | ENSSSCT000000027428 | .        | intron     | -0.015 | rs793812660     | 2 |
| AC.GT       | 7 | 41717657 | 41717668 | 6       | ENSSSCT00000001792  | .        | intron     | 0.5    | rs351155 rs7914 | 2 |
| AC.GT       | 7 | 41717657 | 41717668 | 6       | ENSSSCT000000030920 | .        | intron     | 0.5    | rs351155 rs7914 | 2 |
| AC.GT       | 7 | 41717657 | 41717668 | 6       | ENSSSCT000000027428 | .        | intron     | 0.5    | rs351155 rs7914 | 2 |
| AAAGC.GCTTT | 7 | 41760464 | 41760492 | 5.8     | .                   | .        | intergenic | -0.477 | rs280355 rs7882 | 2 |
| AAAC.GTTT   | 7 | 41827962 | 41827979 | 4.5     | .                   | .        | intergenic | 0.169  | .               | 2 |
| AAAC.GTTT   | 7 | 42130525 | 42130544 | 5       | ENSSSCT00000001801  | MDF1     | intron     | -0.304 | .               | 2 |
| AT.AT       | 7 | 42852026 | 42852035 | 5       | .                   | .        | intergenic | -0.256 | rs786454887     | 2 |
| AC.GT       | 7 | 42912451 | 42912463 | 6.5     | .                   | .        | intergenic | .      | rs788967366     | 2 |
| AAAC.GTTT   | 7 | 42916402 | 42916426 | 6.25    | .                   | .        | intergenic | -0.096 | rs540068 rs7883 | 2 |
| AAAC.GTTT   | 7 | 43150396 | 43150414 | 4.75    | ENSSSCT00000001825  | .        | intron     | 0.151  | rs793128882     | 3 |
| AAAAC.GTTTT | 7 | 43549482 | 43549500 | 3.8     | ENSSSCT00000001847  | CUL7     | intron     | 1.009  | rs792043476     | 2 |
| AAAC.GTTT   | 7 | 43629247 | 43629264 | 4.5     | ENSSSCT00000001850  | KLC4     | intron     | 0.122  | rs787418887     | 2 |
| AAAC.GTTT   | 7 | 43742558 | 43742572 | 3.75    | ENSSSCT000000030706 | CUL9     | intron     | 0.293  | .               | 2 |
| AAT.ATT     | 7 | 43768435 | 43768451 | 5.66667 | ENSSSCT00000001861  | C6ORF108 | promoter   | .      | rs349946 rs7930 | 2 |
| AAT.ATT     | 7 | 43768435 | 43768451 | 5.66667 | ENSSSCT00000001854  | C6ORF108 | promoter   | .      | rs349946 rs7930 | 2 |
| AATG.CATT   | 7 | 43797160 | 43797186 | 6.75    | ENSSSCT00000001855  | TBKB1    | intron     | -0.046 | rs790322811     | 2 |
| AAC.GTT     | 7 | 44687221 | 44687242 | 7.33333 | .                   | .        | intergenic | 1.167  | rs788002630     | 2 |
| AAAC.GTTT   | 7 | 45072433 | 45072456 | 6       | .                   | .        | intergenic | 0.032  | rs791006420     | 2 |
| AATG.CATT   | 7 | 45128625 | 45128644 | 5       | ENSSSCT00000001903  | NFKBIE   | intron     | 0.932  | rs792993713     | 2 |
| AATG.CATT   | 7 | 45128625 | 45128644 | 5       | ENSSSCT000000032591 | NFKBIE   | intron     | 0.932  | rs792993713     | 2 |
| AC.GT       | 7 | 45740913 | 45740923 | 5.5     | ENSSSCT00000001909  | .        | intron     | 0.814  | rs709857311     | 2 |
| AG.CT       | 7 | 45823338 | 45823354 | 8.5     | ENSSSCT00000001909  | .        | intron     | .      | .               | 4 |
| AAAG.CTTT   | 7 | 46086137 | 46086151 | 3.75    | .                   | .        | intergenic | 0.283  | rs793115164     | 2 |
| AAAC.GTTT   | 7 | 46186415 | 46186434 | 5       | .                   | .        | intergenic | .      | .               | 2 |
| AAC.GTT     | 7 | 46365927 | 46365939 | 4.33333 | ENSSSCT00000023043  | .        | intron     | -0.02  | rs318136 rs7934 | 2 |

|             |   |          |          |         |                    |          |            |        |               |   |
|-------------|---|----------|----------|---------|--------------------|----------|------------|--------|---------------|---|
| AG.CT       | 7 | 46398814 | 46398830 | 8.5     | ENSSSCT00000023043 |          | intron     | 1.497  | rs792944058   | 3 |
| AAC.GTT     | 7 | 46892875 | 46892888 | 4.66667 | .                  | .        | intergenic | .      | 134247 rs7925 | 2 |
| AC.GT       | 7 | 47053353 | 47053369 | 8.5     | ENSSSCT00000001911 | CLIC5    | intron     | -0.037 | 239149 rs7931 | 2 |
| AAC.GTT     | 7 | 47184859 | 47184878 | 6.66667 | .                  | .        | intergenic | .      | rs790867464   | 2 |
| AAAAC.GTTTT | 7 | 47205432 | 47205447 | 3.2     | .                  | .        | intergenic | .      | rs792358850   | 2 |
| AG.CT       | 7 | 47408734 | 47408748 | 7.5     | ENSSSCT00000001918 | RCAN2    | intron     | 0.027  | rs787496928   | 2 |
| AATG.CATT   | 7 | 47440400 | 47440433 | 8.5     | ENSSSCT00000001918 | RCAN2    | intron     | 0.397  | 356613 rs7890 | 2 |
| AAAT.ATTT   | 7 | 48187218 | 48187234 | 4.25    | .                  | .        | intergenic | .      | rs792115996   | 2 |
| AAAAT.ATTTT | 7 | 48194418 | 48194444 | 5.4     | .                  | .        | intergenic | -0.051 | rs787947387   | 4 |
| AC.GT       | 7 | 48383964 | 48383982 | 9.5     | ENSSSCT00000001929 | GPR116   | intron     | -0.691 | 74880 rs7934  | 6 |
| AAAAC.GTTTT | 7 | 48397104 | 48397134 | 6.2     | ENSSSCT00000001929 | GPR116   | intron     | .      | 360378 rs6989 | 3 |
| AAC.GTT     | 7 | 48470831 | 48470851 | 7       | ENSSSCT00000001930 | GPR110   | intron     | .      | rs791196014   | 2 |
| AAC.GTT     | 7 | 48521588 | 48521613 | 8.66667 | .                  | .        | intergenic | 0.279  | rs790776240   | 2 |
| AAAC.GTTT   | 7 | 48619486 | 48619504 | 4.75    | .                  | .        | intergenic | 0.143  | rs788091187   | 2 |
| AT.AT       | 7 | 48665518 | 48665532 | 7.5     | .                  | .        | intergenic | 0.077  | .             | 4 |
| AAAAT.ATTTT | 7 | 48786826 | 48786848 | 4.6     | .                  | .        | intergenic | 0.006  | rs791275475   | 2 |
| AG.CT       | 7 | 48828044 | 48828056 | 6.5     | .                  | .        | intergenic | 0.109  | 366751 rs7907 | 2 |
| AT.AT       | 7 | 48852344 | 48852354 | 5.5     | .                  | .        | intergenic | 0.07   | 382651 rs7862 | 2 |
| AAAC.GTTT   | 7 | 48873416 | 48873437 | 5.5     | .                  | .        | intergenic | 0.123  | 360121 rs7926 | 2 |
| AAAC.GTTT   | 7 | 48945324 | 48945338 | 3.75    | ENSSSCT00000001932 | .        | intron     | 0.16   | rs786230801   | 2 |
| AAAAT.ATTTT | 7 | 49091755 | 49091779 | 5       | ENSSSCT00000001933 | .        | intron     | -0.028 | .             | 2 |
| AAAAT.ATTTT | 7 | 49100709 | 49100727 | 3.8     | ENSSSCT00000001933 | .        | intron     | -0.035 | .             | 2 |
| AATT.AATT   | 7 | 49170585 | 49170602 | 4.5     | .                  | .        | intergenic | 0.044  | 120140 rs7914 | 2 |
| AAAT.ATTT   | 7 | 49195248 | 49195270 | 5.75    | .                  | .        | intergenic | .      | 335268 rs7915 | 2 |
| AAAAC.GTTTT | 7 | 49220297 | 49220314 | 3.6     | .                  | .        | intergenic | -0.043 | 390574 rs7870 | 2 |
| AC.GT       | 7 | 49574606 | 49574620 | 7.5     | .                  | .        | intergenic | 0.033  | 715745 rs7932 | 2 |
| AG.CT       | 7 | 49625954 | 49625965 | 6       | .                  | .        | intergenic | .      | .             | 2 |
| AG.CT       | 7 | 49676584 | 49676620 | 18.5    | .                  | .        | intergenic | 0.127  | 352180 rs7895 | 4 |
| AT.AT       | 7 | 49687496 | 49687506 | 5.5     | .                  | .        | intergenic | .      | 365293 rs7920 | 2 |
| AC.GT       | 7 | 49785098 | 49785118 | 10.5    | .                  | .        | intergenic | .      | .             | 2 |
| AAAAG.CTTTT | 7 | 49988076 | 49988093 | 3.6     | .                  | .        | intergenic | 0.043  | .             | 4 |
| AAAAC.GTTTT | 7 | 50014501 | 50014515 | 3       | .                  | .        | intergenic | 0.032  | 752842 rs7881 | 2 |
| AT.AT       | 7 | 50289991 | 50290000 | 5       | ENSSSCT00000001944 | CRISP1   | intron     | -0.122 | .             | 2 |
| AAAAT.ATTTT | 7 | 50399073 | 50399096 | 4.8     | .                  | .        | intergenic | -0.077 | .             | 2 |
| AG.CT       | 7 | 50575022 | 50575034 | 6.5     | .                  | .        | intergenic | .      | rs791311865   | 2 |
| AAAAC.GTTTT | 7 | 50580836 | 50580857 | 4.4     | .                  | .        | intergenic | -0.134 | rs789993159   | 2 |
| AACC.GGTT   | 7 | 50854266 | 50854297 | 8       | .                  | .        | intergenic | -0.096 | rs788052512   | 2 |
| AAAC.GTTT   | 7 | 51011333 | 51011353 | 5.25    | ENSSSCT00000001950 | TFAP2D   | intron     | 0.113  | 182265 rs7898 | 2 |
| AG.CT       | 7 | 51013146 | 51013159 | 7       | ENSSSCT00000001950 | TFAP2D   | intron     | -0.037 | .             | 3 |
| AAAT.ATTT   | 7 | 51047596 | 51047614 | 4.75    | ENSSSCT00000001950 | TFAP2D   | intron     | 0.077  | .             | 2 |
| AG.CT       | 7 | 51078190 | 51078209 | 10      | .                  | .        | intergenic | 0.037  | rs711869631   | 2 |
| AAAAG.CTTTT | 7 | 51788391 | 51788406 | 3.2     | .                  | .        | intergenic | 0.039  | rs786562515   | 2 |
| AAAC.GTTT   | 7 | 51795401 | 51795420 | 5       | .                  | .        | intergenic | .      | rs705433247   | 2 |
| AC.GT       | 7 | 52139025 | 52139049 | 12.5    | ENSSSCT00000001952 | .        | intron     | 0.033  | rs791005458   | 4 |
| AT.AT       | 7 | 52192035 | 52192045 | 5.5     | ENSSSCT00000001952 | .        | intron     | .      | .             | 2 |
| CACAT.ATGTG | 7 | 52226615 | 52226642 | 4.66667 | ENSSSCT00000001952 | .        | intron     | 0.109  | rs788239110   | 2 |
| AT.AT       | 7 | 52285592 | 52285623 | 16      | ENSSSCT00000001952 | .        | intron     | -0.186 | rs791216632   | 2 |
| AG.CT       | 7 | 52302478 | 52302490 | 6.5     | ENSSSCT00000001952 | .        | intron     | 0.549  | .             | 2 |
| AAAC.GTTT   | 7 | 52471799 | 52471814 | 4       | .                  | .        | intergenic | 0.318  | 123835 rs7930 | 4 |
| AAT.ATT     | 7 | 52927139 | 52927163 | 8.33333 | .                  | .        | intergenic | 0.287  | 325269 rs7894 | 2 |
| AC.GT       | 7 | 52950046 | 52950056 | 5.5     | ENSSSCT00000001961 | HYKK     | intron     | 0.075  | rs791539519   | 3 |
| AT.AT       | 7 | 53382728 | 53382737 | 5       | .                  | .        | intergenic | 0.204  | rs792515055   | 2 |
| AAAC.GTTT   | 7 | 53434484 | 53434505 | 5.5     | ENSSSCT00000032525 | .        | intron     | -0.048 | 343859 rs7931 | 2 |
| AC.GT       | 7 | 53777933 | 53777944 | 6       | ENSSSCT00000001986 | RASGRF1  | intron     | -0.087 | 354953 rs7079 | 2 |
| AG.CT       | 7 | 53826747 | 53826757 | 5.5     | .                  | .        | intergenic | -0.072 | rs790142400   | 2 |
| AC.GT       | 7 | 53836002 | 53836012 | 5.5     | .                  | .        | intergenic | -0.025 | rs789314176   | 2 |
| AAAAT.ATTTT | 7 | 53859608 | 53859632 | 5       | .                  | .        | intergenic | .      | rs791153045   | 2 |
| AT.AT       | 7 | 53946103 | 53946115 | 6.5     | .                  | .        | intergenic | 0.06   | 340957 rs7937 | 3 |
| AT.AT       | 7 | 53994318 | 53994328 | 5.5     | .                  | .        | intergenic | 0.058  | rs791321750   | 2 |
| AG.CT       | 7 | 54061586 | 54061602 | 8.5     | ENSSSCT00000001990 | KIAA1024 | promoter   | 1.246  | rs788603802   | 2 |
| AT.AT       | 7 | 54076578 | 54076590 | 6.5     | .                  | .        | intergenic | 0.294  | rs789626198   | 3 |
| AC.GT       | 7 | 54429804 | 54429818 | 7.5     | .                  | .        | intergenic | .      | rs793787994   | 2 |
| AAAAC.GTTTT | 7 | 54505760 | 54505781 | 3.66667 | ENSSSCT00000001994 | ZFAND6   | intron     | .      | 137464 rs7929 | 2 |
| AAT.ATT     | 7 | 54510556 | 54510572 | 5.66667 | ENSSSCT00000001994 | ZFAND6   | intron     | 0.079  | 373213 rs7864 | 2 |
| AAAAC.GTTTT | 7 | 54599104 | 54599124 | 4.2     | .                  | .        | intergenic | -0.019 | rs792123937   | 2 |
| AGGG.CCCT   | 7 | 54695801 | 54695818 | 4.5     | .                  | .        | intergenic | -0.16  | 308225 rs7921 | 2 |
| AT.AT       | 7 | 55323126 | 55323137 | 6       | .                  | .        | intergenic | 0.091  | rs788576756   | 2 |
| AATG.CATT   | 7 | 55361376 | 55361393 | 4.5     | .                  | .        | intergenic | 1.072  | .             | 3 |
| AT.AT       | 7 | 55446112 | 55446127 | 8       | .                  | .        | intergenic | -0.04  | rs787131537   | 2 |
| AC.GT       | 7 | 55593319 | 55593329 | 5.5     | ENSSSCT00000035382 | IL-16    | intron     | -0.15  | rs708607449   | 2 |
| AC.GT       | 7 | 55593319 | 55593329 | 5.5     | ENSSSCT00000025614 | IL-16    | intron     | -0.15  | rs708607449   | 2 |
| AC.GT       | 7 | 55593319 | 55593329 | 5.5     | ENSSSCT00000034701 | IL-16    | intron     | -0.15  | rs708607449   | 2 |
| AAAC.GTTT   | 7 | 55683261 | 55683284 | 6       | ENSSSCT00000035382 | IL-16    | intron     | -0.139 | 709487 rs7900 | 2 |
| AAAC.GTTT   | 7 | 55683261 | 55683284 | 6       | ENSSSCT00000034701 | IL-16    | intron     | -0.139 | 709487 rs7900 | 2 |
| AAAC.GTTT   | 7 | 55683261 | 55683284 | 6       | ENSSSCT00000002002 | IL-16    | promoter   | -0.139 | 709487 rs7900 | 2 |
| AC.GT       | 7 | 55712852 | 55712862 | 5.5     | ENSSSCT00000002003 | STARD5   | intron     | 0.018  | rs793270793   | 2 |
| AG.CT       | 7 | 55897730 | 55897748 | 9.5     | .                  | .        | intergenic | -0.221 | 112877 rs7880 | 2 |
| AAAC.GTTT   | 7 | 56037274 | 56037294 | 5.25    | .                  | .        | intergenic | .      | 356325 rs7893 | 2 |
| AAAG.CTTT   | 7 | 56041567 | 56041578 | 3       | .                  | .        | intergenic | .      | .             | 2 |
| AAG.CTT     | 7 | 56260856 | 56260881 | 8.66667 | .                  | .        | intergenic | -0.29  | .             | 2 |
| AT.AT       | 7 | 56282282 | 56282291 | 5       | .                  | .        | intergenic | -0.011 | rs793448581   | 2 |
| AAAC.GTTT   | 7 | 56400532 | 56400548 | 4.25    | ENSSSCT00000002007 | .        | intron     | .      | rs786915599   | 2 |
| AAAC.GTTT   | 7 | 56400532 | 56400548 | 4.25    | ENSSSCT00000002008 | .        | promoter   | .      | rs786915599   | 2 |
| AAAT.ATTT   | 7 | 56496772 | 56496801 | 7.5     | .                  | .        | intergenic | .      | 388127 rs7907 | 2 |

|             |   |          |          |         |                     |          |            |        |               |   |
|-------------|---|----------|----------|---------|---------------------|----------|------------|--------|---------------|---|
| AAAC.GTTT   | 7 | 56510790 | 56510802 | 3.25    | ENSSSCT00000002009  | .        | intron     | 0.198  | rs793207873   | 2 |
| AT.AT       | 7 | 56661087 | 56661097 | 5.5     | ENSSSCT00000002009  | .        | intron     | .      | rs790264097   | 2 |
| AT.AT       | 7 | 56816073 | 56816088 | 8       | .                   | .        | intergenic | 0.242  | rs706836422   | 2 |
| AAAC.GTTT   | 7 | 56833841 | 56833859 | 4.75    | .                   | .        | intergenic | 0.182  | .             | 2 |
| AC.GT       | 7 | 56907248 | 56907259 | 6       | ENSSSCT00000002011  | SH3GL3   | intron     | -0.001 | 333064 rs7874 | 2 |
| AC.GT       | 7 | 56907248 | 56907259 | 6       | ENSSSCT00000029711  | SH3GL3   | intron     | -0.001 | 333064 rs7874 | 2 |
| AAAT.ATTT   | 7 | 57209890 | 57209908 | 4.75    | .                   | .        | intergenic | .      | rs791877637   | 2 |
| AG.CT       | 7 | 57518253 | 57518263 | 5.5     | ENSSSCT00000002020  | HOMER2   | intron     | -0.374 | 345227 rs7896 | 2 |
| AAAC.GTTT   | 7 | 57537546 | 57537568 | 5.75    | ENSSSCT00000002020  | HOMER2   | intron     | -0.09  | 196442 rs7869 | 2 |
| AAAC.GTTT   | 7 | 57556317 | 57556339 | 5.75    | ENSSSCT00000002020  | HOMER2   | intron     | .      | rs792240050   | 2 |
| AAC.GTT     | 7 | 57562119 | 57562146 | 9.33333 | ENSSSCT00000002020  | HOMER2   | intron     | 0.099  | rs786803206   | 2 |
| AAAT.ATTT   | 7 | 57619571 | 57619599 | 7.25    | ENSSSCT00000002021  | WHAMM    | intron     | .      | rs790409472   | 2 |
| AAAC.GTTT   | 7 | 57624999 | 57625017 | 4.75    | ENSSSCT00000002021  | WHAMM    | intron     | .      | rs789571532   | 2 |
| AG.CT       | 7 | 57639588 | 57639611 | 12      | .                   | .        | intergenic | 0.025  | 347094 rs7927 | 2 |
| AAAAC.GTTTT | 7 | 57650324 | 57650354 | 5.16667 | .                   | .        | intergenic | .      | 704780 rs7935 | 2 |
| AC.GT       | 7 | 57762507 | 57762520 | 7       | ENSSSCT00000002023  | .        | intron     | 1.402  | rs788368968   | 2 |
| AAAAG.CTTTT | 7 | 57884571 | 57884592 | 4.4     | .                   | .        | intergenic | .      | 293590 rs7870 | 2 |
| AAAC.GTTT   | 7 | 57971678 | 57971692 | 3.75    | ENSSSCT00000002032  | PDE8A    | intron     | 0.053  | rs787387482   | 2 |
| AT.AT       | 7 | 58211090 | 58211104 | 7.5     | .                   | .        | intergenic | .      | rs791849710   | 2 |
| AC.GT       | 7 | 58816274 | 58816286 | 6.5     | ENSSSCT00000002046  | CCDC37   | intron     | .      | rs786387265   | 2 |
| AAAC.GTTT   | 7 | 58900476 | 58900494 | 4.75    | .                   | .        | intergenic | -0.529 | 345034 rs7924 | 2 |
| AAAC.GTTT   | 7 | 59510939 | 59510953 | 3.75    | ENSSSCT00000002056  | MFGE8    | intron     | .      | rs789847352   | 2 |
| ATC.GAT     | 7 | 59835081 | 59835109 | 9.66667 | ENSSSCT00000002059  | FANCI    | intron     | 0.976  | rs791627407   | 2 |
| AAC.GTT     | 7 | 60154250 | 60154275 | 8.66667 | ENSSSCT000000022362 | PEX11A   | promoter   | .      | rs786957468   | 2 |
| AC.GT       | 7 | 60170573 | 60170583 | 5.5     | ENSSSCT00000002069  | WDR93    | intron     | .      | rs786294466   | 2 |
| AAC.GTT     | 7 | 60313453 | 60313475 | 7.66667 | ENSSSCT000000025884 | AP3S2    | intron     | 0.049  | 305364 rs7869 | 2 |
| ACAT.ATGT   | 7 | 60374230 | 60374248 | 4.75    | .                   | .        | intergenic | -0.035 | rs790159479   | 2 |
| AAAT.ATTT   | 7 | 60654649 | 60654676 | 7       | .                   | .        | intergenic | .      | 171091 rs7874 | 2 |
| AAGG.CCTT   | 7 | 60773497 | 60773515 | 4.75    | .                   | .        | intergenic | .      | .             | 2 |
| AG.CT       | 7 | 61802267 | 61802281 | 7.5     | .                   | .        | intergenic | 0.256  | rs791465817   | 2 |
| ATC.GAT     | 7 | 61829299 | 61829322 | 8       | .                   | .        | intergenic | 0.105  | .             | 2 |
| AAGT.ACTT   | 7 | 61831977 | 61831993 | 4.25    | .                   | .        | intergenic | .      | 160962 rs7890 | 2 |
| AAAT.ATTT   | 7 | 61950143 | 61950161 | 4.75    | .                   | .        | intergenic | 0.187  | .             | 2 |
| AAAC.GTTT   | 7 | 62474168 | 62474200 | 8.25    | .                   | .        | intergenic | -0.112 | 106511 rs7914 | 2 |
| AC.GT       | 7 | 62680977 | 62680997 | 10.5    | .                   | .        | intergenic | -0.06  | .             | 2 |
| AAAAG.CTTTT | 7 | 62788599 | 62788618 | 4       | ENSSSCT00000002103  | PTPN9    | intron     | 0.549  | rs788332334   | 2 |
| AAAT.ATTT   | 7 | 62985914 | 62985939 | 6.5     | .                   | .        | intergenic | .      | rs791440260   | 2 |
| AAAAC.GTTTT | 7 | 63005980 | 63006002 | 3.83333 | .                   | .        | intergenic | -0.089 | rs791749478   | 2 |
| AAAC.GTTT   | 7 | 63210351 | 63210374 | 6       | .                   | .        | intergenic | 0.333  | rs786568239   | 2 |
| AAG.CTT     | 7 | 63752936 | 63752969 | 11.3333 | .                   | .        | intergenic | 0.335  | rs791575691   | 2 |
| AC.GT       | 7 | 63934701 | 63934723 | 11.5    | .                   | .        | intergenic | -0.129 | .             | 4 |
| AAAC.GTTT   | 7 | 64054489 | 64054510 | 5.5     | ENSSSCT00000002141  | PML      | intron     | 0.093  | rs791847653   | 2 |
| AAAAC.GTTTT | 7 | 64134096 | 64134123 | 5.6     | .                   | .        | intergenic | .      | rs790274512   | 2 |
| AAAC.GTTT   | 7 | 64135423 | 64135441 | 4.75    | .                   | .        | intergenic | .      | rs790773473   | 2 |
| AG.CT       | 7 | 64159135 | 64159152 | 9       | ENSSSCT00000002144  | .        | intron     | -0.086 | .             | 3 |
| AGAT.ATCT   | 7 | 64202830 | 64202852 | 5.75    | .                   | .        | intergenic | 0.169  | rs793063296   | 2 |
| AAAAG.CTTTT | 7 | 64470478 | 64470496 | 3.8     | .                   | .        | intergenic | .      | rs788425896   | 2 |
| AAAT.ATTT   | 7 | 65191109 | 65191122 | 3.5     | ENSSSCT00000002153  | BBS4     | intron     | 0.131  | rs787521357   | 2 |
| AAAT.ATTT   | 7 | 65191109 | 65191122 | 3.5     | ENSSSCT00000002151  | ARIH1    | intron     | 0.131  | rs787521357   | 2 |
| AAAC.GTTT   | 7 | 65321659 | 65321674 | 4       | ENSSSCT000000030450 | .        | intron     | 0.033  | rs789674067   | 6 |
| ACCT.AGGT   | 7 | 65330258 | 65330283 | 6.5     | ENSSSCT000000030450 | .        | intron     | .      | rs787655448   | 2 |
| AT.AT       | 7 | 65708025 | 65708035 | 5.5     | ENSSSCT00000002166  | .        | intron     | 0.12   | rs790436710   | 2 |
| AT.AT       | 7 | 66323236 | 66323252 | 8.5     | .                   | .        | intergenic | 0.446  | 374460 rs7862 | 2 |
| AATG.CATT   | 7 | 66375733 | 66375753 | 5.25    | .                   | .        | intergenic | 0.165  | rs792341705   | 3 |
| AAAAC.GTTTT | 7 | 66614785 | 66614808 | 4.8     | .                   | .        | intergenic | 0.097  | rs791054250   | 2 |
| AAC.GTT     | 7 | 67621606 | 67621619 | 4.66667 | .                   | .        | intergenic | 0.048  | rs788636466   | 2 |
| ATCC.GGAT   | 7 | 67724684 | 67724705 | 5.5     | .                   | .        | intergenic | 0.191  | .             | 2 |
| AAAT.ATTT   | 7 | 67759605 | 67759622 | 4.5     | .                   | .        | intergenic | 0.024  | rs792389911   | 2 |
| AC.GT       | 7 | 67977578 | 67977593 | 8       | .                   | .        | intergenic | .      | rs793253034   | 6 |
| AC.GT       | 7 | 68082885 | 68082897 | 6.5     | .                   | .        | intergenic | 0.205  | 228187 rs6970 | 4 |
| AAAAT.ATTTT | 7 | 68187046 | 68187068 | 4.6     | ENSSSCT00000002174  | SLC25A21 | intron     | 0.157  | rs792460610   | 2 |
| ATATC.GATAT | 7 | 68431907 | 68431937 | 5.16667 | .                   | .        | intergenic | .      | 324816 rs7909 | 2 |
| AAAT.ATTT   | 7 | 68496545 | 68496567 | 5.75    | .                   | .        | intergenic | 0.169  | 340708 rs7911 | 2 |
| AAAT.ATTT   | 7 | 68508092 | 68508112 | 5.25    | .                   | .        | intergenic | 0.239  | rs787034732   | 2 |
| AAT.ATT     | 7 | 68541439 | 68541452 | 4.66667 | .                   | .        | intergenic | .      | 376656 rs7882 | 2 |
| ACTAT.ATAGT | 7 | 68980793 | 68980807 | 3       | .                   | .        | intergenic | .      | rs789953143   | 2 |
| AAAC.GTTT   | 7 | 69130279 | 69130302 | 6       | ENSSSCT000000029555 | .        | intron     | .      | rs788725404   | 2 |
| AT.AT       | 7 | 69157085 | 69157097 | 6.5     | ENSSSCT000000029555 | .        | intron     | .      | 300247 rs7902 | 2 |
| AT.AT       | 7 | 69347307 | 69347316 | 5       | .                   | .        | intergenic | 0.289  | .             | 2 |
| AC.GT       | 7 | 69459253 | 69459268 | 8       | .                   | .        | intergenic | -0.011 | rs790538305   | 2 |
| AATT.AATT   | 7 | 69664806 | 69664828 | 5.75    | ENSSSCT00000002187  | SRP54    | intron     | 0.228  | rs791380281   | 2 |
| AAG.CTT     | 7 | 70019404 | 70019426 | 7.66667 | ENSSSCT000000020434 | U1       | promoter   | 0.189  | rs791439142   | 2 |
| AAAC.GTTT   | 7 | 70024300 | 70024320 | 5.25    | .                   | .        | intergenic | .      | 328976 rs7933 | 2 |
| AAAT.ATTT   | 7 | 70049058 | 70049076 | 4.75    | ENSSSCT00000002193  | EAPP     | intron     | .      | rs792805545   | 2 |
| AAAG.CTTT   | 7 | 70078406 | 70078423 | 4.5     | .                   | .        | intergenic | .      | rs789542241   | 2 |
| AT.AT       | 7 | 70189860 | 70189873 | 7       | .                   | .        | intergenic | -0.066 | .             | 2 |
| AC.GT       | 7 | 70200785 | 70200795 | 5.5     | .                   | .        | intergenic | .      | rs791692940   | 2 |
| AATG.CATT   | 7 | 70469199 | 70469225 | 6.75    | .                   | .        | intergenic | 0.01   | 372634 rs7903 | 2 |
| AAAC.GTTT   | 7 | 70559440 | 70559462 | 5.75    | .                   | .        | intergenic | 0.222  | rs786803497   | 2 |
| AT.AT       | 7 | 70695653 | 70695663 | 5.5     | ENSSSCT00000002196  | EGLN3    | 3'utr      | 0.801  | rs793084999   | 2 |
| AT.AT       | 7 | 70787601 | 70787613 | 6.5     | .                   | .        | intergenic | 5.822  | rs788033164   | 4 |
| AAG.CTT     | 7 | 71048902 | 71048913 | 4       | .                   | .        | intergenic | 0.365  | 374527 rs7905 | 2 |
| AC.GT       | 7 | 71390323 | 71390333 | 5.5     | ENSSSCT000000022418 | .        | intron     | .      | .             | 3 |
| AG.CT       | 7 | 71472848 | 71472857 | 5       | ENSSSCT000000022418 | .        | intron     | 0.085  | rs793603118   | 2 |



|              |   |          |          |         |                    |           |            |        |               |   |   |
|--------------|---|----------|----------|---------|--------------------|-----------|------------|--------|---------------|---|---|
| AC.GT        | 7 | 71507826 | 71507837 | 6       | ENSSSCT00000022418 | .         | intron     | -0.077 | .             | . | 4 |
| AC.GT        | 7 | 72213885 | 72213897 | 6.5     | ENSSSCT00000002199 | .         | intron     | .      | rs790782265   | . | 2 |
| AT.AT        | 7 | 72355835 | 72355851 | 8.5     | ENSSSCT00000028957 | .         | 3'utr      | .      | rs793607184   | . | 2 |
| AC.GT        | 7 | 72369037 | 72369048 | 6       | ENSSSCT00000028957 | .         | intron     | 0.218  | .             | . | 2 |
| AAAC.GTTT    | 7 | 72487426 | 72487452 | 6.75    | .                  | .         | intergenic | -0.069 | rs788033881   | . | 3 |
| AAAG.CTTT    | 7 | 72704207 | 72704229 | 5.75    | ENSSSCT00000029319 | NUBPL     | intron     | 0.08   | rs788407071   | . | 2 |
| AAC.GTT      | 7 | 72947280 | 72947296 | 5.66667 | .                  | .         | intergenic | .      | 102806 rs7881 | . | 2 |
| AG.CT        | 7 | 72963159 | 72963173 | 7.5     | ENSSSCT00000023087 | GPR33     | promoter   | 0.306  | 266542 rs7915 | . | 3 |
| AG.CT        | 7 | 72967826 | 72967836 | 5.5     | ENSSSCT00000023087 | GPR33     | intron     | 0.166  | .             | . | 2 |
| AAAG.CTTT    | 7 | 73030946 | 73030963 | 4.5     | .                  | .         | intergenic | 0.352  | rs789752145   | . | 3 |
| AAAC.GTTT    | 7 | 73906868 | 73906903 | 9       | .                  | .         | intergenic | .      | 184575 rs7918 | . | 4 |
| AAAC.GTTT    | 7 | 74269938 | 74269960 | 5.75    | .                  | .         | intergenic | 0.36   | rs792980586   | . | 2 |
| AATC.GATT    | 7 | 75685810 | 75685833 | 6       | .                  | .         | intergenic | 0.39   | rs791010477   | . | 2 |
| AAAAC.GTTTT  | 7 | 75879025 | 75879050 | 5.2     | .                  | .         | intergenic | 0.227  | rs790286712   | . | 2 |
| AG.CT        | 7 | 75960453 | 75960462 | 5       | .                  | .         | intergenic | 0.101  | .             | . | 3 |
| AC.GT        | 7 | 76222333 | 76222348 | 8       | .                  | .         | intergenic | .      | rs793412251   | . | 3 |
| AC.GT        | 7 | 76384937 | 76384947 | 5.5     | .                  | .         | intergenic | .      | rs788091845   | . | 3 |
| AAAC.GTTT    | 7 | 76640506 | 76640519 | 3.5     | .                  | .         | intergenic | .      | rs791067850   | . | 2 |
| AT.AT        | 7 | 76919177 | 76919202 | 13      | .                  | .         | intergenic | 0.111  | rs789175644   | . | 2 |
| AAC.GTT      | 7 | 77112499 | 77112511 | 4.33333 | .                  | .         | intergenic | -0.034 | rs793540514   | . | 2 |
| AAAC.GTTT    | 7 | 77248787 | 77248822 | 9       | .                  | .         | intergenic | 0.031  | rs790415695   | . | 2 |
| AAAG.CTTT    | 7 | 77427615 | 77427636 | 5.5     | .                  | .         | intergenic | 0.066  | rs786903447   | . | 2 |
| AAC.GTT      | 7 | 77589115 | 77589139 | 8.33333 | .                  | .         | intergenic | -0.163 | rs793258576   | . | 3 |
| AT.AT        | 7 | 77734934 | 77734943 | 5       | .                  | .         | intergenic | .      | rs789128625   | . | 2 |
| AG.CT        | 7 | 77998659 | 77998682 | 12      | .                  | .         | intergenic | 0.145  | .             | . | 4 |
| AT.AT        | 7 | 78096575 | 78096591 | 8.5     | .                  | .         | intergenic | -0.026 | rs788028593   | . | 2 |
| AAAC.GTTT    | 7 | 78362079 | 78362093 | 3.75    | .                  | .         | intergenic | 0.003  | .             | . | 2 |
| AGATAT.ATATC | 7 | 78409092 | 78409120 | 4.83333 | .                  | .         | intergenic | -0.108 | rs788154095   | . | 2 |
| AAAAAT.ATTTT | 7 | 78455194 | 78455214 | 3.5     | .                  | .         | intergenic | .      | rs792566919   | . | 2 |
| AT.AT        | 7 | 78472613 | 78472627 | 7.5     | .                  | .         | intergenic | 0.008  | rs790271215   | . | 2 |
| AG.CT        | 7 | 78817411 | 78817425 | 7.5     | .                  | .         | intergenic | 0.2    | rs791770435   | . | 2 |
| AAAT.ATTT    | 7 | 78976899 | 78976918 | 5       | .                  | .         | intergenic | 0.195  | .             | . | 2 |
| AAAAC.GTTTT  | 7 | 79429993 | 79430013 | 4.2     | .                  | .         | intergenic | 0.044  | 188751 rs7905 | . | 2 |
| AC.GT        | 7 | 79660047 | 79660057 | 5.5     | ENSSSCT00000002211 | STXBP6    | intron     | 0.292  | rs788733229   | . | 2 |
| AATC.GATT    | 7 | 79844905 | 79844924 | 5       | .                  | .         | intergenic | 0.045  | rs793167922   | . | 2 |
| AG.CT        | 7 | 79874949 | 79874959 | 5.5     | .                  | .         | intergenic | 0.098  | rs707845398   | . | 4 |
| AAAT.ATTT    | 7 | 79893646 | 79893670 | 6.25    | .                  | .         | intergenic | -0.107 | rs787475155   | . | 2 |
| AT.AT        | 7 | 79896843 | 79896857 | 7.5     | .                  | .         | intergenic | -0.22  | .             | . | 4 |
| AAC.GTT      | 7 | 80673143 | 80673161 | 6.33333 | .                  | .         | intergenic | .      | 106126 rs7931 | . | 2 |
| AAAC.GTTT    | 7 | 80705247 | 80705261 | 3.75    | .                  | .         | intergenic | 0.19   | rs787298150   | . | 2 |
| CCCCC.GGGGC  | 7 | 80706963 | 80706981 | 3.16667 | .                  | .         | intergenic | -0.011 | rs693200018   | . | 2 |
| AG.CT        | 7 | 81285343 | 81285352 | 5       | ENSSSCT00000002277 | C14orf119 | promoter   | 0.301  | rs789237906   | . | 2 |
| AG.CT        | 7 | 81285343 | 81285352 | 5       | ENSSSCT00000002276 | ACIN1     | promoter   | 0.301  | rs789237906   | . | 2 |
| AT.AT        | 7 | 81662967 | 81662976 | 5       | .                  | .         | intergenic | 0.211  | rs787963477   | . | 2 |
| AG.CT        | 7 | 81698050 | 81698062 | 6.5     | .                  | .         | intergenic | -0.017 | 211181 rs7884 | . | 3 |
| AG.CT        | 7 | 82023644 | 82023659 | 8       | .                  | .         | intergenic | .      | .             | . | 2 |
| AAT.ATT      | 7 | 82030117 | 82030132 | 5.33333 | .                  | .         | intergenic | 0.222  | 353426 rs7925 | . | 2 |
| AAAAC.GTTTT  | 7 | 82045361 | 82045385 | 5       | ENSSSCT00000002299 | TRAV41    | promoter   | 0.081  | 774133 rs7899 | . | 2 |
| AGAT.ATCT    | 7 | 82132773 | 82132787 | 3.75    | .                  | .         | intergenic | -0.003 | 372094 rs7899 | . | 2 |
| AG.CT        | 7 | 82172625 | 82172634 | 5       | .                  | .         | intergenic | -0.03  | .             | . | 2 |
| AAT.ATT      | 7 | 83262971 | 83262982 | 4       | .                  | .         | intergenic | .      | 387422 rs7890 | . | 2 |
| AC.GT        | 7 | 83423601 | 83423619 | 9.5     | .                  | .         | intergenic | 0.133  | .             | . | 2 |
| AAAAT.ATTTT  | 7 | 83431198 | 83431215 | 3.6     | .                  | .         | intergenic | .      | rs788112670   | . | 2 |
| AT.AT        | 7 | 83672388 | 83672403 | 8       | .                  | .         | intergenic | .      | rs789241421   | . | 2 |
| AG.CT        | 7 | 83890276 | 83890286 | 5.5     | .                  | .         | intergenic | .      | rs793236199   | . | 2 |
| AC.GT        | 7 | 83913149 | 83913159 | 5.5     | .                  | .         | intergenic | 0.483  | rs789418865   | . | 3 |
| AAC.GTT      | 7 | 84272118 | 84272142 | 8.33333 | .                  | .         | intergenic | .      | .             | . | 3 |
| AC.GT        | 7 | 84733600 | 84733623 | 12      | .                  | .         | intergenic | .      | .             | . | 2 |
| AAC.GTT      | 7 | 85918256 | 85918270 | 5       | .                  | .         | intergenic | .      | .             | . | 2 |
| AT.AT        | 7 | 86199707 | 86199716 | 5       | ENSSSCT00000002498 | .         | intron     | 0.249  | rs793780149   | . | 2 |
| AAAC.GTTT    | 7 | 86342388 | 86342406 | 4.75    | .                  | .         | intergenic | 0.473  | rs789124154   | . | 2 |
| AAT.ATT      | 7 | 86365208 | 86365224 | 5.66667 | .                  | .         | intergenic | .      | rs792452402   | . | 3 |
| ACAT.ATGT    | 7 | 86494759 | 86494770 | 3       | .                  | .         | intergenic | 0.163  | rs787244082   | . | 2 |
| AAAAAT.ATTTT | 7 | 86542973 | 86542999 | 4.5     | .                  | .         | intergenic | .      | rs789685734   | . | 2 |
| AAAAC.GTTT   | 7 | 86591289 | 86591309 | 4.2     | .                  | .         | intergenic | -0.192 | rs788287887   | . | 2 |
| AAAAC.GTTT   | 7 | 86671304 | 86671323 | 4       | .                  | .         | intergenic | 0.162  | 28616 rs7928  | . | 2 |
| AT.AT        | 7 | 86807141 | 86807152 | 6       | .                  | .         | intergenic | 0.201  | rs792380757   | . | 3 |
| AAAC.GTTT    | 7 | 86810536 | 86810568 | 8.25    | .                  | .         | intergenic | 0.178  | 159672 rs7881 | . | 2 |
| AT.AT        | 7 | 86881672 | 86881704 | 16.5    | .                  | .         | intergenic | 0.109  | rs789125576   | . | 2 |
| AG.CT        | 7 | 86931053 | 86931063 | 5.5     | .                  | .         | intergenic | 0.248  | .             | . | 2 |
| AT.AT        | 7 | 87505431 | 87505440 | 5       | .                  | .         | intergenic | 0.081  | rs790279182   | . | 2 |
| AAAT.ATTT    | 7 | 87599969 | 87599992 | 6       | ENSSSCT00000034830 | ARRDC4    | promoter   | -0.036 | 347131 rs7897 | . | 2 |
| AAAT.ATTT    | 7 | 87599969 | 87599992 | 6       | ENSSSCT00000002508 | ARRDC4    | promoter   | -0.036 | 347131 rs7897 | . | 2 |
| AAAT.ATTT    | 7 | 87600246 | 87600257 | 3       | ENSSSCT00000034830 | ARRDC4    | promoter   | -0.209 | rs787525351   | . | 2 |
| AAAT.ATTT    | 7 | 87600246 | 87600257 | 3       | ENSSSCT00000002508 | ARRDC4    | promoter   | -0.209 | rs787525351   | . | 2 |
| AAGG.CCTT    | 7 | 87605900 | 87605923 | 6       | .                  | .         | intergenic | -0.229 | .             | . | 2 |
| AAAC.GTTT    | 7 | 87699621 | 87699643 | 5.75    | .                  | .         | intergenic | 0.073  | rs791665525   | . | 2 |
| AAAC.GTTT    | 7 | 87959821 | 87959835 | 3.75    | .                  | .         | intergenic | .      | rs791411544   | . | 2 |
| AC.GT        | 7 | 87970152 | 87970165 | 7       | .                  | .         | intergenic | 0.023  | rs790905034   | . | 7 |
| AAAAC.GTTTT  | 7 | 87995460 | 87995479 | 4       | .                  | .         | intergenic | -0.113 | rs786330166   | . | 2 |
| AATG.CATT    | 7 | 88022545 | 88022563 | 4.75    | .                  | .         | intergenic | 0.161  | rs786325158   | . | 2 |
| AAAT.ATTT    | 7 | 88120190 | 88120204 | 3.75    | .                  | .         | intergenic | -0.033 | 363195 rs7884 | . | 2 |
| AAAC.GTTT    | 7 | 88326194 | 88326208 | 3.75    | .                  | .         | intergenic | -0.045 | rs789349595   | . | 2 |
| AC.GT        | 7 | 88694305 | 88694318 | 7       | .                  | .         | intergenic | -0.107 | 279323 rs7885 | . | 2 |

|             |   |          |          |         |                     |           |            |        |                  |   |
|-------------|---|----------|----------|---------|---------------------|-----------|------------|--------|------------------|---|
| AAC.GTT     | 7 | 88869774 | 88869790 | 5.66667 | .                   | .         | intergenic | -0.272 | .                | 2 |
| AGAT.ATCT   | 7 | 89858058 | 89858073 | 4       | .                   | .         | intergenic | 0.133  | rs792864102      | 2 |
| AC.GT       | 7 | 89878637 | 89878649 | 6.5     | .                   | .         | intergenic | -0.176 | rs793184046      | 2 |
| AGG.CCT     | 7 | 89903639 | 89903650 | 4       | .                   | .         | intergenic | 2.109  | rs790908567      | 2 |
| AT.AT       | 7 | 90079044 | 90079054 | 5.5     | .                   | .         | intergenic | 0.17   | rs786473026      | 2 |
| AC.GT       | 7 | 90114647 | 90114661 | 7.5     | .                   | .         | intergenic | -0.139 | rs78953 rs7915   | 2 |
| AT.AT       | 7 | 90324501 | 90324513 | 6.5     | .                   | .         | intergenic | .      | rs799936 rs7867  | 2 |
| AT.AT       | 7 | 90516163 | 90516173 | 5.5     | .                   | .         | intergenic | 0.263  | .                | 3 |
| AG.CT       | 7 | 90565415 | 90565424 | 5       | .                   | .         | intergenic | -0.05  | .                | 4 |
| AAAT.ATTT   | 7 | 90584907 | 90584929 | 5.75    | .                   | .         | intergenic | -0.089 | rs793210470      | 2 |
| AAAAT.ATTTT | 7 | 90616372 | 90616390 | 3.8     | .                   | .         | intergenic | 0.42   | rs791003020      | 2 |
| AAAC.GTTT   | 7 | 90631011 | 90631022 | 3       | .                   | .         | intergenic | .      | rs792471214      | 2 |
| AAAT.ATTT   | 7 | 90662789 | 90662820 | 8       | ENSSSCT00000026803  | .         | intron     | .      | rs345594 rs7907  | 3 |
| AC.GT       | 7 | 90846684 | 90846702 | 9.5     | .                   | .         | intergenic | -0.192 | rs793679272      | 4 |
| AC.GT       | 7 | 90969175 | 90969185 | 5.5     | .                   | .         | intergenic | 0.188  | rs699852960      | 2 |
| AAAC.GTTT   | 7 | 91427875 | 91427897 | 5.75    | .                   | .         | intergenic | .      | rs79536 rs7893   | 2 |
| AG.CT       | 7 | 91474386 | 91474397 | 6       | .                   | .         | intergenic | -0.067 | rs790352624      | 2 |
| AC.GT       | 7 | 91667351 | 91667372 | 11      | .                   | .         | intergenic | -0.132 | rs789171 rs7886  | 2 |
| AAAC.GTTT   | 7 | 91729432 | 91729445 | 3.5     | .                   | .         | intergenic | -0.332 | rs79019 rs7900   | 2 |
| AAAG.CTTT   | 7 | 91901853 | 91901867 | 3.75    | ENSSSCT00000002524  | CHD2      | intron     | .      | rs788303780      | 2 |
| AAAG.CTTT   | 7 | 91901853 | 91901867 | 3.75    | ENSSSCT000000025402 | CHD2      | intron     | .      | rs788303780      | 2 |
| AAAC.GTTT   | 7 | 91919654 | 91919673 | 5       | ENSSSCT00000002524  | CHD2      | intron     | -0.016 | rs728887 rs7885  | 2 |
| AAAC.GTTT   | 7 | 91919654 | 91919673 | 5       | ENSSSCT000000027293 | CHD2      | intron     | -0.016 | rs728887 rs7885  | 2 |
| AAAC.GTTT   | 7 | 91919654 | 91919673 | 5       | ENSSSCT000000025402 | CHD2      | intron     | -0.016 | rs728887 rs7885  | 2 |
| AAAGC.GCTTT | 7 | 92021453 | 92021470 | 3.6     | .                   | .         | intergenic | 0.069  | rs789947457      | 2 |
| AT.AT       | 7 | 92362054 | 92362067 | 7       | .                   | .         | intergenic | 0.124  | .                | 2 |
| AC.GT       | 7 | 92683096 | 92683109 | 7       | .                   | .         | intergenic | 0.132  | rs381758 rs7899  | 2 |
| AC.GT       | 7 | 92730659 | 92730670 | 6       | ENSSSCT00000002520  | SLCO3A1   | intron     | -0.267 | rs792361778      | 3 |
| AAAT.ATTT   | 7 | 92897324 | 92897339 | 4       | ENSSSCT00000002520  | SLCO3A1   | intron     | -0.117 | rs791671898      | 2 |
| AAAC.GTTT   | 7 | 93051694 | 93051716 | 5.75    | .                   | .         | intergenic | 0.249  | rs772459 rs7893  | 2 |
| AAAG.CTTT   | 7 | 93233803 | 93233814 | 3       | .                   | .         | intergenic | 0.065  | rs707767727      | 2 |
| AT.AT       | 7 | 93400284 | 93400306 | 11.5    | .                   | .         | intergenic | 0.206  | rs766919 rs7915  | 2 |
| AT.AT       | 7 | 93884707 | 93884721 | 7.5     | .                   | .         | intergenic | 0.017  | rs740369 rs7921  | 2 |
| AATT.AATT   | 7 | 93947565 | 93947592 | 7       | .                   | .         | intergenic | 0.086  | rs705157 rs7901  | 2 |
| AG.CT       | 7 | 94180897 | 94180909 | 6.5     | .                   | .         | intergenic | -0.212 | rs742530 rs7899  | 2 |
| AG.CT       | 7 | 94687699 | 94687709 | 5.5     | .                   | .         | intergenic | .      | .                | 2 |
| AAAAC.GTTTT | 7 | 94798221 | 94798248 | 4.66667 | ENSSSCT00000002528  | .         | intron     | .      | rs788867916      | 2 |
| AGC.GCT     | 7 | 94895983 | 94895994 | 4       | .                   | .         | intergenic | 0.034  | .                | 2 |
| AAAG.CTTT   | 7 | 95078316 | 95078361 | 11.5    | .                   | .         | intergenic | 0.14   | rs786355402      | 3 |
| AAGG.CCTT   | 7 | 95079399 | 95079423 | 6.25    | .                   | .         | intergenic | 0.128  | rs786696496      | 2 |
| AAAAT.ATTTT | 7 | 95082400 | 95082426 | 5.4     | .                   | .         | intergenic | -0.032 | rs787938999      | 2 |
| AAAAC.GTTTT | 7 | 95264597 | 95264619 | 4.6     | ENSSSCT00000002535  | SPTB      | intron     | 0.168  | rs792283089      | 2 |
| ACAT.ATGT   | 7 | 95293953 | 95293975 | 5.75    | ENSSSCT00000002535  | SPTB      | intron     | -0.144 | .                | 2 |
| AC.GT       | 7 | 95502799 | 95502809 | 5.5     | ENSSSCT00000002539  | HURC1-FN' | intron     | 0.423  | .                | 3 |
| AAC.GTT     | 7 | 95625127 | 95625144 | 6       | .                   | .         | intergenic | 0.051  | rs727425 rs7925  | 2 |
| AAAC.GTTT   | 7 | 95916562 | 95916577 | 4       | ENSSSCT00000002542  | FUT8      | intron     | 0.224  | rs786505877      | 2 |
| AG.CT       | 7 | 95958167 | 95958202 | 18      | ENSSSCT00000002542  | FUT8      | intron     | .      | rs791724878      | 2 |
| AG.CT       | 7 | 96053100 | 96053121 | 11      | ENSSSCT00000002542  | FUT8      | intron     | 0.13   | rs796226 rs7911  | 4 |
| AAAAC.GTTTT | 7 | 96098557 | 96098582 | 5.2     | ENSSSCT00000002542  | FUT8      | intron     | 0.175  | rs742291 rs7886  | 2 |
| ACC.GGT     | 7 | 96206500 | 96206516 | 5.66667 | .                   | .         | intergenic | 0.55   | rs792703815      | 2 |
| AC.GT       | 7 | 96248891 | 96248901 | 5.5     | .                   | .         | intergenic | .      | rs792028598      | 2 |
| AG.CT       | 7 | 96256887 | 96256911 | 12.5    | .                   | .         | intergenic | -0.001 | .                | 2 |
| AAAAT.ATTTT | 7 | 96399563 | 96399585 | 4.6     | .                   | .         | intergenic | 0.071  | rs7068913 rs7864 | 4 |
| AG.CT       | 7 | 96447066 | 96447078 | 6.5     | .                   | .         | intergenic | 0.805  | rs786754665      | 2 |
| AAAT.ATTT   | 7 | 96508602 | 96508623 | 5.5     | .                   | .         | intergenic | -0.309 | rs7253148 rs7893 | 2 |
| AC.GT       | 7 | 96726824 | 96726833 | 5       | .                   | .         | intergenic | 0.053  | .                | 2 |
| AAAAC.GTTTT | 7 | 97109149 | 97109178 | 5       | ENSSSCT00000002545  | GPHN      | intron     | -0.078 | rs7394595 rs7932 | 2 |
| AAAT.ATTT   | 7 | 97223166 | 97223189 | 6       | .                   | .         | intergenic | 0.292  | rs7316828 rs7874 | 2 |
| AAAC.GTTT   | 7 | 97262852 | 97262872 | 5.25    | .                   | .         | intergenic | 0.147  | rs7338583 rs7877 | 3 |
| AC.GT       | 7 | 97355624 | 97355636 | 6.5     | ENSSSCT00000002548  | MPP5      | intron     | 1.804  | .                | 2 |
| AAAC.GTTT   | 7 | 97630991 | 97631016 | 6.5     | .                   | .         | intergenic | .      | rs789592157      | 2 |
| AAAC.GTTT   | 7 | 97635996 | 97636018 | 5.75    | .                   | .         | intergenic | .      | rs789097183      | 2 |
| AAAAT.ATTTT | 7 | 97685269 | 97685295 | 5.4     | ENSSSCT00000002555  | ARG2      | intron     | 0.166  | rs709773 rs7910  | 2 |
| AAAAT.ATTTT | 7 | 97685269 | 97685295 | 5.4     | ENSSSCT000000033367 | ARG2      | intron     | 0.166  | rs709773 rs7910  | 2 |
| AAAAT.ATTTT | 7 | 97685269 | 97685295 | 5.4     | ENSSSCT000000033225 | ARG2      | intron     | 0.166  | rs709773 rs7910  | 2 |
| AAAAT.ATTTT | 7 | 97685269 | 97685295 | 5.4     | ENSSSCT000000034592 | ARG2      | intron     | 0.166  | rs709773 rs7910  | 2 |
| AAAT.ATTT   | 7 | 97710292 | 97710314 | 5.75    | ENSSSCT00000002556  | VTI1B     | intron     | 0.079  | rs787945654      | 2 |
| AC.GT       | 7 | 97790835 | 97790848 | 7       | ENSSSCT00000002558  | RDH12     | intron     | 0.313  | .                | 3 |
| AAAG.CTTT   | 7 | 97829623 | 97829637 | 3.75    | ENSSSCT00000002559  | ZFYVE26   | intron     | 0.018  | rs793716689      | 2 |
| AC.GT       | 7 | 97834915 | 97834931 | 8.5     | ENSSSCT00000002559  | ZFYVE26   | intron     | 1.948  | .                | 2 |
| AC.GT       | 7 | 97889539 | 97889548 | 5       | ENSSSCT00000002559  | ZFYVE26   | intron     | 0.447  | .                | 3 |
| AAAC.GTTT   | 7 | 98024458 | 98024481 | 6       | .                   | .         | intergenic | 0.987  | rs788389995      | 2 |
| AAAC.GTTT   | 7 | 98072629 | 98072649 | 5.25    | .                   | .         | intergenic | 0.213  | rs790646837      | 2 |
| AT.AT       | 7 | 98188931 | 98188956 | 13      | .                   | .         | intergenic | 0.528  | rs735319 rs7878  | 2 |
| AAC.GTT     | 7 | 98231684 | 98231695 | 4       | .                   | .         | intergenic | .      | rs793295010      | 2 |
| AAC.GTT     | 7 | 98342075 | 98342093 | 6.33333 | ENSSSCT000000023246 | .         | intron     | 0.288  | rs793095329      | 2 |
| AAGGG.CCCTT | 7 | 98473315 | 98473338 | 4       | ENSSSCT000000023246 | .         | intron     | 0.203  | rs787685449      | 2 |
| ATC.GAT     | 7 | 98631201 | 98631225 | 8.33333 | .                   | .         | intergenic | 0.152  | rs788383406      | 4 |
| AG.CT       | 7 | 98733645 | 98733657 | 6.5     | .                   | .         | intergenic | 0.008  | rs789208301      | 2 |
| AAAC.GTTT   | 7 | 98970687 | 98970701 | 3.75    | .                   | .         | intergenic | .      | rs787440619      | 2 |
| AC.GT       | 7 | 98989708 | 98989719 | 6       | .                   | .         | intergenic | 0.277  | rs753526 rs7895  | 3 |
| AAC.GTT     | 7 | 99212175 | 99212192 | 6       | ENSSSCT00000002568  | GALNT16   | intron     | 0.121  | rs7319870 rs7898 | 2 |
| AAAC.GTTT   | 7 | 99479000 | 99479013 | 3.5     | .                   | .         | intergenic | 0.009  | rs790286551      | 2 |
| AC.GT       | 7 | 99593229 | 99593240 | 6       | ENSSSCT00000002573  | KIAA0247  | intron     | 0.109  | .                | 4 |

|             |   |           |           |         |                     |         |            |        |                 |   |
|-------------|---|-----------|-----------|---------|---------------------|---------|------------|--------|-----------------|---|
| AAAT.ATTT   | 7 | 99635434  | 99635453  | 5       | .                   | .       | intergenic | .      | rs786767165     | 2 |
| AAAAC.GTTTT | 7 | 99747883  | 99747911  | 5.8     | .                   | .       | intergenic | 0.156  | rs12799 rs7891  | 2 |
| AAAC.GTTT   | 7 | 100191557 | 100191584 | 7       | ENSSSCT00000002578  | COX16   | intron     | .      | rs786746458     | 2 |
| AAAC.GTTT   | 7 | 100581328 | 100581363 | 9       | .                   | .       | intergenic | 0.113  | rs787689704     | 2 |
| AAAAC.GTTTT | 7 | 100630475 | 100630499 | 5       | .                   | .       | intergenic | 0.161  | .               | 2 |
| AAAAG.CTTTT | 7 | 100954863 | 100954902 | 8       | .                   | .       | intergenic | .      | rs790911189     | 2 |
| AAAC.GTTT   | 7 | 100964944 | 100964958 | 3.75    | .                   | .       | intergenic | .      | rs787807528     | 2 |
| AAAC.GTTT   | 7 | 101256704 | 101256718 | 3.75    | .                   | .       | intergenic | 0.046  | rs793304430     | 2 |
| AAG.CTT     | 7 | 101565223 | 101565234 | 4       | .                   | .       | intergenic | -0.034 | rs792455858     | 2 |
| AAG.CTT     | 7 | 101614710 | 101614723 | 4.66667 | .                   | .       | intergenic | 0.098  | rs786681387     | 4 |
| AATC.GATT   | 7 | 101716793 | 101716824 | 8       | .                   | .       | intergenic | -0.07  | rs369908 rs7872 | 2 |
| AAAAC.GTTTT | 7 | 101902719 | 101902733 | 3       | ENSSSCT00000002596  | .       | intron     | -0.104 | rs787560337     | 2 |
| AC.GT       | 7 | 101959191 | 101959209 | 9.5     | ENSSSCT00000002596  | .       | intron     | 1.106  | rs788196086     | 2 |
| AG.CT       | 7 | 102006037 | 102006049 | 6.5     | ENSSSCT00000002596  | .       | intron     | 0.759  | rs793400304     | 2 |
| AAC.GTT     | 7 | 102151285 | 102151312 | 9.33333 | ENSSSCT00000002600  | ZFYVE1  | intron     | .      | .               | 2 |
| AC.GT       | 7 | 102293591 | 102293608 | 9       | ENSSSCT000000035550 | PSEN1   | intron     | .      | rs792497949     | 2 |
| AC.GT       | 7 | 102293591 | 102293608 | 9       | ENSSSCT00000002603  | PSEN1   | intron     | .      | rs792497949     | 2 |
| AG.CT       | 7 | 102376966 | 102376979 | 7       | .                   | .       | intergenic | -0.154 | .               | 2 |
| AAAC.GTTT   | 7 | 102485566 | 102485591 | 6.5     | ENSSSCT000000031856 | .       | intron     | .      | rs788546391     | 2 |
| AG.CT       | 7 | 102867208 | 102867228 | 10.5    | .                   | .       | intergenic | 0.163  | rs792814502     | 2 |
| AAAC.GTTT   | 7 | 102933307 | 102933324 | 4.5     | ENSSSCT00000002615  | .       | intron     | .      | rs789239466     | 2 |
| AAAAC.GTTTT | 7 | 103039479 | 103039507 | 5.8     | ENSSSCT00000002619  | ENTPD5  | intron     | 0.614  | .               | 2 |
| AAAT.ATTT   | 7 | 103059968 | 103059986 | 4.75    | .                   | .       | intergenic | 0.343  | rs787052657     | 2 |
| AC.GT       | 7 | 103343974 | 103343994 | 10.5    | .                   | .       | intergenic | 0.119  | .               | 4 |
| AAAT.ATTT   | 7 | 103488918 | 103488941 | 6       | .                   | .       | intergenic | .      | rs788321385     | 2 |
| ACG.CGT     | 7 | 103731283 | 103731297 | 5       | .                   | .       | intergenic | 0.412  | rs142377 rs7893 | 2 |
| AAAG.CTTT   | 7 | 103912061 | 103912081 | 5.25    | ENSSSCT00000002638  | PROX2   | intron     | .      | rs789488458     | 2 |
| AAAG.CTTT   | 7 | 103912061 | 103912081 | 5.25    | ENSSSCT00000002637  | PROX2   | intron     | .      | rs789488458     | 2 |
| AG.CT       | 7 | 104105328 | 104105344 | 8.5     | ENSSSCT00000002646  | ACYP1   | intron     | .      | rs793163244     | 2 |
| AAAC.GTTT   | 7 | 104132580 | 104132607 | 7       | ENSSSCT00000002648  | NEK9    | intron     | 0.145  | rs790794499     | 2 |
| AAT.ATT     | 7 | 104171241 | 104171260 | 6.66667 | .                   | .       | intergenic | 0.201  | rs787518222     | 2 |
| AG.CT       | 7 | 104238182 | 104238195 | 7       | .                   | .       | intergenic | 0.176  | .               | 4 |
| AAC.GTT     | 7 | 104351066 | 104351080 | 5       | .                   | .       | intergenic | .      | rs335464 rs7863 | 2 |
| AAC.GTT     | 7 | 104485589 | 104485605 | 5.66667 | .                   | .       | intergenic | .      | rs186620 rs7880 | 2 |
| AG.CT       | 7 | 104536763 | 104536777 | 7.5     | .                   | .       | intergenic | 0.336  | rs793666281     | 3 |
| AAAC.GTTT   | 7 | 105160150 | 105160161 | 3       | ENSSSCT000000024345 | TLL5    | intron     | .      | rs788196704     | 2 |
| AAAC.GTTT   | 7 | 105223764 | 105223795 | 8       | .                   | .       | intergenic | 0.24   | rs787137915     | 2 |
| AAAAC.GTTTT | 7 | 105286608 | 105286628 | 4.2     | ENSSSCT00000002653  | IFT43   | intron     | .      | rs355095 rs7872 | 2 |
| AAC.GTT     | 7 | 105438456 | 105438481 | 8.66667 | .                   | .       | intergenic | .      | rs272730 rs7878 | 3 |
| AT.AT       | 7 | 105510467 | 105510476 | 5       | .                   | .       | intergenic | 0.092  | rs753040 rs7879 | 2 |
| AG.CT       | 7 | 105921091 | 105921103 | 6.5     | .                   | .       | intergenic | 0.123  | .               | 3 |
| AT.AT       | 7 | 105927538 | 105927549 | 6       | .                   | .       | intergenic | 0.263  | rs789807677     | 2 |
| AC.GT       | 7 | 106061611 | 106061623 | 6.5     | .                   | .       | intergenic | -0.228 | rs790311342     | 2 |
| AC.GT       | 7 | 106128888 | 106128902 | 7.5     | .                   | .       | intergenic | 0.06   | rs181249 rs7918 | 2 |
| AAAC.GTTT   | 7 | 106441808 | 106441827 | 5       | ENSSSCT00000002675  | .       | intron     | -0.025 | .               | 2 |
| AAAAC.GTTTT | 7 | 106486373 | 106486400 | 5.6     | ENSSSCT000000023660 | NOXRED1 | intron     | 0.343  | rs792772094     | 2 |
| AG.CT       | 7 | 106948547 | 106948556 | 5       | .                   | .       | intergenic | 0.096  | .               | 2 |
| AT.AT       | 7 | 106966854 | 106966863 | 5       | .                   | .       | intergenic | .      | rs787796168     | 2 |
| AC.GT       | 7 | 107264924 | 107264935 | 6       | .                   | .       | intergenic | 0.061  | rs790224522     | 3 |
| AGGG.CCCT   | 7 | 107335217 | 107335235 | 4.75    | .                   | .       | intergenic | 0.575  | rs792404294     | 2 |
| ACAG.CTGT   | 7 | 107491456 | 107491472 | 4.25    | .                   | .       | intergenic | 0.044  | rs788871347     | 2 |
| ATC.GAT     | 7 | 107497310 | 107497329 | 6.66667 | .                   | .       | intergenic | 0.14   | rs351029 rs7867 | 2 |
| AG.CT       | 7 | 107524165 | 107524178 | 7       | .                   | .       | intergenic | 0.091  | rs791814613     | 2 |
| AATT.AATT   | 7 | 107648226 | 107648241 | 4       | .                   | .       | intergenic | .      | rs788839664     | 2 |
| AAC.GTT     | 7 | 107687053 | 107687074 | 7.33333 | .                   | .       | intergenic | 0.021  | rs520170 rs7873 | 2 |
| AAAAC.GTTTT | 7 | 107761411 | 107761425 | 3       | .                   | .       | intergenic | 0.825  | rs787396856     | 2 |
| AG.CT       | 7 | 107953293 | 107953305 | 6.5     | ENSSSCT000000025256 | NRXN3   | intron     | -0.027 | rs786391036     | 2 |
| AAAT.ATTT   | 7 | 107982121 | 107982141 | 5.25    | .                   | .       | intergenic | 0.304  | rs788851024     | 2 |
| AC.GT       | 7 | 108444932 | 108444951 | 10      | .                   | .       | intergenic | 1.251  | .               | 2 |
| AC.GT       | 7 | 108512335 | 108512354 | 10      | ENSSSCT000000031767 | .       | intron     | 0.354  | rs331932 rs7937 | 3 |
| AG.CT       | 7 | 108570840 | 108570851 | 6       | ENSSSCT000000031767 | .       | intron     | 0.043  | rs788032377     | 3 |
| AC.GT       | 7 | 108648435 | 108648446 | 6       | ENSSSCT000000031767 | .       | intron     | 0.051  | rs792963703     | 2 |
| AC.GT       | 7 | 109085659 | 109085671 | 6.5     | .                   | .       | intergenic | -0.097 | rs322303 rs7878 | 2 |
| AAAT.ATTT   | 7 | 109101711 | 109101726 | 4       | .                   | .       | intergenic | 0.077  | rs790636503     | 2 |
| AAAAT.ATTTT | 7 | 109126716 | 109126734 | 3.8     | .                   | .       | intergenic | .      | rs162148 rs7931 | 2 |
| AAAC.GTTT   | 7 | 109196283 | 109196305 | 5.75    | .                   | .       | intergenic | .      | rs793538058     | 2 |
| AC.GT       | 7 | 109239454 | 109239466 | 6.5     | .                   | .       | intergenic | -0.033 | rs793578924     | 3 |
| AAAAC.GTTTT | 7 | 109262633 | 109262654 | 4.4     | .                   | .       | intergenic | 0.138  | rs180063 rs7868 | 2 |
| ATC.GATT    | 7 | 109271904 | 109271915 | 4       | .                   | .       | intergenic | 0.299  | rs517632 rs7867 | 3 |
| AAAT.ATTT   | 7 | 109485184 | 109485202 | 4.75    | .                   | .       | intergenic | 0.231  | rs793658461     | 2 |
| AAAAC.GTTTT | 7 | 109648044 | 109648069 | 5.2     | .                   | .       | intergenic | 0.061  | rs194039 rs7915 | 2 |
| AAAAT.ATTTT | 7 | 109827715 | 109827738 | 4.8     | ENSSSCT000000028622 | .       | intron     | .      | rs792905672     | 2 |
| AG.CT       | 7 | 110421806 | 110421822 | 8.5     | ENSSSCT00000002683  | SEL1L   | intron     | 0.243  | .               | 4 |
| AAAG.CTTT   | 7 | 110492286 | 110492314 | 7.25    | .                   | .       | intergenic | 0.208  | rs792577578     | 2 |
| AT.AT       | 7 | 110506324 | 110506333 | 5       | .                   | .       | intergenic | 0.34   | rs787825149     | 2 |
| ATCC.GGAT   | 7 | 110527683 | 110527696 | 3.5     | .                   | .       | intergenic | 0.239  | rs789607714     | 2 |
| AAAT.ATTT   | 7 | 110552596 | 110552614 | 4.75    | .                   | .       | intergenic | 0.093  | rs789541216     | 2 |
| AT.AT       | 7 | 110670792 | 110670803 | 6       | .                   | .       | intergenic | 0.298  | rs793701691     | 2 |
| AAACC.GGTTT | 7 | 110980357 | 110980389 | 6.6     | .                   | .       | intergenic | 0.241  | rs791420423     | 2 |
| AG.CT       | 7 | 111398541 | 111398553 | 6.5     | .                   | .       | intergenic | -0.089 | .               | 3 |
| ATC.GAT     | 7 | 111413385 | 111413397 | 4.33333 | .                   | .       | intergenic | -0.053 | .               | 2 |
| AT.AT       | 7 | 111635306 | 111635318 | 6.5     | .                   | .       | intergenic | -0.168 | rs372690 rs7905 | 2 |
| AC.GT       | 7 | 111885752 | 111885761 | 5       | .                   | .       | intergenic | .      | .               | 2 |
| AG.CT       | 7 | 111983812 | 111983825 | 7       | .                   | .       | intergenic | -0.011 | .               | 3 |

|                |   |           |           |         |                    |         |            |        |        |             |   |
|----------------|---|-----------|-----------|---------|--------------------|---------|------------|--------|--------|-------------|---|
| AAAAG.CTTTT    | 7 | 112392545 | 112392563 | 3.8     | .                  | .       | intergenic | -0.102 | 336768 | rs7877      | 2 |
| AAAC.GTTT      | 7 | 112414758 | 112414784 | 6.75    | .                  | .       | intergenic | .      |        | rs791879394 | 2 |
| AAAT.ATTT      | 7 | 112490695 | 112490711 | 4.25    | .                  | .       | intergenic | -0.008 | 387364 | rs7924      | 2 |
| AC.GT          | 7 | 112779082 | 112779091 | 5       | .                  | .       | intergenic | 0.046  | .      | .           | 3 |
| AAC.GTT        | 7 | 112810611 | 112810624 | 4.66667 | .                  | .       | intergenic | 0.427  |        | rs792157222 | 4 |
| AGG.CCT        | 7 | 112896847 | 112896858 | 4       | .                  | .       | intergenic | -0.126 | 332066 | rs7938      | 2 |
| AT.AT          | 7 | 112999679 | 112999688 | 5       | .                  | .       | intergenic | 0.022  |        | rs786480695 | 2 |
| (GAGAT.ATCTC'  | 7 | 113009721 | 113009758 | 6.33333 | .                  | .       | intergenic | .      |        | rs792753953 | 2 |
| AAAC.GTTT      | 7 | 113058920 | 113058943 | 6       | .                  | .       | intergenic | -0.105 |        | rs788154398 | 2 |
| AC.GT          | 7 | 113169654 | 113169665 | 6       | .                  | .       | intergenic | -0.119 |        | rs786503151 | 2 |
| AT.AT          | 7 | 113205023 | 113205033 | 5.5     | .                  | .       | intergenic | -0.21  | 353156 | rs7910      | 2 |
| ACAT.ATGT      | 7 | 113276446 | 113276476 | 7.75    | .                  | .       | intergenic | 0.216  | 114678 | rs7889      | 2 |
| AC.GT          | 7 | 113376520 | 113376534 | 7.5     | .                  | .       | intergenic | -0.217 | 373812 | rs7900      | 2 |
| AC.GT          | 7 | 113382670 | 113382698 | 14.5    | .                  | .       | intergenic | -0.006 | 302407 | rs7869      | 2 |
| AG.CT          | 7 | 113400021 | 113400032 | 6       | .                  | .       | intergenic | -0.171 |        | rs789204045 | 2 |
| AT.AT          | 7 | 113514496 | 113514505 | 5       | .                  | .       | intergenic | 0.382  |        | rs793804263 | 2 |
| AC.GT          | 7 | 113560755 | 113560765 | 5.5     | .                  | .       | intergenic | -0.194 |        | rs792277110 | 2 |
| AC.GT          | 7 | 113593443 | 113593455 | 6.5     | .                  | .       | intergenic | -0.124 |        | .           | 5 |
| AAAC.GTTT      | 7 | 113632201 | 113632215 | 3.75    | .                  | .       | intergenic | 0.116  |        | rs786869494 | 2 |
| AAC.GTT        | 7 | 113695692 | 113695713 | 7.33333 | .                  | .       | intergenic | -0.122 |        | rs791099855 | 3 |
| ATCC.GGAT      | 7 | 113748721 | 113748741 | 5.25    | .                  | .       | intergenic | 0.299  | 190964 | rs7871      | 2 |
| AC.GT          | 7 | 113778208 | 113778230 | 11.5    | .                  | .       | intergenic | 0.012  |        | .           | 4 |
| AT.AT          | 7 | 113786683 | 113786697 | 7.5     | .                  | .       | intergenic | 0.016  | 321451 | rs7903      | 2 |
| AAAC.GTTT      | 7 | 113979561 | 113979580 | 5       | .                  | .       | intergenic | 0.719  |        | rs792907056 | 2 |
| AAAC.GTTT      | 7 | 114001440 | 114001458 | 4.75    | .                  | .       | intergenic | 0.198  |        | rs791030091 | 2 |
| ATC.GAT        | 7 | 114062616 | 114062634 | 6.33333 | .                  | .       | intergenic | 0.071  | 114053 | rs7875      | 2 |
| AAAC.GTTT      | 7 | 114144290 | 114144312 | 5.75    | .                  | .       | intergenic | -0.258 |        | rs790293758 | 2 |
| ACT.AGT        | 7 | 114390552 | 114390563 | 4       | .                  | .       | intergenic | 0.308  |        | rs791730855 | 2 |
| AAT.ATT        | 7 | 114461852 | 114461869 | 6       | .                  | .       | intergenic | -0.162 |        | rs792111292 | 2 |
| AAAC.GTTT      | 7 | 114516062 | 114516092 | 7.75    | .                  | .       | intergenic | .      |        | rs787469654 | 2 |
| AAT.ATT        | 7 | 114516217 | 114516228 | 4       | .                  | .       | intergenic | .      |        | .           | 2 |
| AT.AT          | 7 | 114626474 | 114626486 | 6.5     | .                  | .       | intergenic | 0.01   |        | rs792054778 | 2 |
| AC.GT          | 7 | 114711531 | 114711555 | 12.5    | .                  | .       | intergenic | -0.043 |        | .           | 2 |
| AT.AT          | 7 | 114822722 | 114822733 | 6       | .                  | .       | intergenic | 0.029  |        | rs698526009 | 4 |
| AG.CT          | 7 | 114863853 | 114863873 | 10.5    | .                  | .       | intergenic | -0.25  |        | rs709745074 | 2 |
| AC.GT          | 7 | 114966101 | 114966110 | 5       | .                  | .       | intergenic | -0.121 |        | rs787754338 | 2 |
| AATT.AATT      | 7 | 115123899 | 115123920 | 5.5     | .                  | .       | intergenic | -0.124 | 783162 | rs7889      | 2 |
| AC.GT          | 7 | 115142849 | 115142859 | 5.5     | .                  | .       | intergenic | -0.233 |        | rs79222358  | 2 |
| AAAC.GTTT      | 7 | 115152852 | 115152866 | 3.75    | .                  | .       | intergenic | 0.19   |        | rs787201727 | 2 |
| AC.GT          | 7 | 115263773 | 115263782 | 5       | .                  | .       | intergenic | -0.028 |        | .           | 2 |
| AAC.GTT        | 7 | 115438971 | 115438983 | 4.33333 | .                  | .       | intergenic | -0.052 | 361830 | rs7864      | 2 |
| AC.GT          | 7 | 115529049 | 115529064 | 8       | .                  | .       | intergenic | -0.189 |        | rs791098103 | 2 |
| AC.GT          | 7 | 115623626 | 115623653 | 14      | .                  | .       | intergenic | -0.004 | 304897 | rs7877      | 2 |
| AT.AT          | 7 | 115743575 | 115743586 | 6       | .                  | .       | intergenic | .      | 700884 | rs7873      | 2 |
| AAAC.GTTT      | 7 | 115791411 | 115791422 | 3       | .                  | .       | intergenic | -0.029 |        | .           | 2 |
| AAAC.GTTT      | 7 | 115833559 | 115833573 | 3.75    | .                  | .       | intergenic | 0.134  | 173780 | rs7901      | 2 |
| AG.CT          | 7 | 115878903 | 115878915 | 6.5     | .                  | .       | intergenic | -0.047 | 139396 | rs7914      | 2 |
| AG.CT          | 7 | 115993296 | 115993308 | 6.5     | .                  | .       | intergenic | 1.763  |        | rs793450837 | 2 |
| AAAC.GTTT      | 7 | 116048588 | 116048607 | 5       | .                  | .       | intergenic | 0.07   |        | rs786949644 | 2 |
| AC.GT          | 7 | 116175804 | 116175813 | 5       | .                  | .       | intergenic | -0.18  |        | rs787436239 | 3 |
| AC.GT          | 7 | 116222792 | 116222807 | 8       | .                  | .       | intergenic | 0.82   |        | rs791571865 | 2 |
| AGG.CCT        | 7 | 116226125 | 116226141 | 5.66667 | .                  | .       | intergenic | .      |        | .           | 2 |
| AAACC.GGTTT    | 7 | 116282641 | 116282664 | 4.8     | .                  | .       | intergenic | 0.413  | 709802 | rs7884      | 2 |
| AAAAC.GTTTT    | 7 | 116571023 | 116571055 | 6.6     | .                  | .       | intergenic | 0.237  | 118379 | rs7862      | 2 |
| AG.CT          | 7 | 116667021 | 116667031 | 5.5     | ENSSSCT0000002692  | KCNK10  | intron     | 0.044  | 372887 | rs7890      | 2 |
| AC.GT          | 7 | 116668501 | 116668514 | 7       | ENSSSCT0000002692  | KCNK10  | intron     | 0.158  |        | .           | 4 |
| AATG.CATT      | 7 | 116685255 | 116685279 | 6.25    | ENSSSCT0000002692  | KCNK10  | intron     | 0.096  |        | .           | 2 |
| AATC.GATT      | 7 | 116915865 | 116915877 | 3.25    | ENSSSCT0000002694  | PTPN21  | intron     | .      |        | rs789633884 | 2 |
| AAAG.CTTT      | 7 | 117244598 | 117244615 | 4.5     | ENSSSCT0000002697  | TTC8    | intron     | 0.117  |        | rs787902370 | 2 |
| AGG.CCT        | 7 | 117287343 | 117287356 | 4.66667 | .                  | .       | intergenic | -0.081 |        | .           | 2 |
| AAT.ATT        | 7 | 117336684 | 117336704 | 7       | ENSSSCT00000022230 | U6      | promoter   | .      | 171442 | rs7873      | 2 |
| AC.GT          | 7 | 117338904 | 117338920 | 8.5     | .                  | .       | intergenic | .      |        | rs791206783 | 2 |
| AG.CT          | 7 | 117719086 | 117719107 | 11      | ENSSSCT0000002698  | FOXN3   | intron     | 0.015  |        | rs793640726 | 2 |
| AAAG.CTTT      | 7 | 117755683 | 117755697 | 3.75    | ENSSSCT0000002698  | FOXN3   | intron     | .      |        | rs791884789 | 2 |
| AAAC.GTTT      | 7 | 117773459 | 117773473 | 3.75    | ENSSSCT0000002698  | FOXN3   | intron     | -0.076 | 333941 | rs7897      | 2 |
| AAC.GTT        | 7 | 117857363 | 117857384 | 7.33333 | ENSSSCT0000002698  | FOXN3   | intron     | 0.28   |        | rs789227671 | 2 |
| AC.GT          | 7 | 118201819 | 118201829 | 5.5     | ENSSSCT0000002700  | EFCAB11 | intron     | -0.184 |        | rs786623831 | 2 |
| AAAT.ATTT      | 7 | 118217558 | 118217574 | 4.25    | ENSSSCT0000002700  | EFCAB11 | intron     | .      |        | rs791390270 | 2 |
| (AAACT.AGTTT'  | 7 | 118325546 | 118325566 | 3.5     | ENSSSCT0000002700  | EFCAB11 | intron     | 0.566  |        | rs787517863 | 2 |
| AAAAT.ATTTT    | 7 | 118357534 | 118357557 | 4.8     | ENSSSCT0000002701  | .       | intron     | -0.134 |        | rs788311059 | 2 |
| AG.CT          | 7 | 118470902 | 118470911 | 5       | ENSSSCT0000002702  | KCNK13  | intron     | .      |        | .           | 2 |
| AAAC.GTTT      | 7 | 118508614 | 118508636 | 5.75    | ENSSSCT0000002702  | KCNK13  | intron     | .      |        | rs792697160 | 2 |
| AAT.ATT        | 7 | 118515285 | 118515302 | 6       | ENSSSCT0000002702  | KCNK13  | intron     | -0.089 |        | rs792715431 | 2 |
| AAT.ATT        | 7 | 118777397 | 118777416 | 6.66667 | .                  | .       | intergenic | -0.031 |        | rs789508161 | 2 |
| AAT.ATT        | 7 | 118816640 | 118816654 | 5       | .                  | .       | intergenic | -0.017 |        | rs788860747 | 2 |
| AG.CT          | 7 | 118929457 | 118929471 | 7.5     | ENSSSCT0000002706  | .       | intron     | 0.256  |        | rs790085272 | 4 |
| ATCC.GGAT      | 7 | 118934781 | 118934819 | 9.75    | ENSSSCT0000002706  | .       | intron     | -0.017 |        | rs793377269 | 2 |
| AG.CT          | 7 | 119282846 | 119282860 | 7.5     | .                  | .       | intergenic | 0.212  |        | rs786430076 | 4 |
| AC.GT          | 7 | 119338904 | 119338915 | 6       | .                  | .       | intergenic | 0.038  |        | rs791587315 | 3 |
| AG.CT          | 7 | 119350502 | 119350511 | 5       | .                  | .       | intergenic | -0.163 |        | rs789806469 | 2 |
| (AAAAAC.GTTTT' | 7 | 119386867 | 119386887 | 3.5     | .                  | .       | intergenic | .      | 371690 | rs7863      | 2 |
| AAAAT.ATTTT    | 7 | 119631316 | 119631343 | 5.6     | .                  | .       | intergenic | .      |        | rs789839651 | 2 |
| AAAGC.GCTTT    | 7 | 119858385 | 119858415 | 6.2     | .                  | .       | intergenic | .      | 182649 | rs7937      | 2 |
| AAAAC.GTTTT    | 7 | 119936516 | 119936550 | 7       | .                  | .       | intergenic | 0.194  | 134658 | rs7924      | 2 |

|             |   |           |           |         |                    |           |            |        |               |   |   |
|-------------|---|-----------|-----------|---------|--------------------|-----------|------------|--------|---------------|---|---|
| AG.CT       | 7 | 120112399 | 120112408 | 5       | ENSSSCT00000002714 | FBLN5     | intron     | 0.745  | .             | . | 2 |
| AAAT.ATTT   | 7 | 120194805 | 120194821 | 4.25    | ENSSSCT00000002715 | TRIP11    | intron     | 0.148  | rs786789505   | . | 2 |
| AAAC.GTTT   | 7 | 120209400 | 120209422 | 5.75    | ENSSSCT00000002715 | TRIP11    | promoter   | 0.126  | rs792173378   | . | 2 |
| AGC.GCT     | 7 | 120224820 | 120224840 | 7       | ENSSSCT00000002716 | ATXN3     | cds        | 0.269  | rs790699493   | . | 2 |
| AT.AT       | 7 | 120225142 | 120225158 | 8.5     | ENSSSCT00000002716 | ATXN3     | intron     | 0.191  | rs789531793   | . | 3 |
| AAAAT.ATTTT | 7 | 120284062 | 120284078 | 3.4     | .                  | .         | intergenic | 0.05   | rs792247595   | . | 2 |
| AAAC.GTTT   | 7 | 120381144 | 120381161 | 4.5     | .                  | .         | intergenic | .      | 354653 rs7872 | . | 2 |
| AC.GT       | 7 | 120490204 | 120490214 | 5.5     | ENSSSCT00000002720 | SLC24A4   | intron     | .      | rs788896225   | . | 2 |
| ATCC.GGAT   | 7 | 120649680 | 120649697 | 4.5     | .                  | .         | intergenic | -0.046 | 351673 rs7885 | . | 2 |
| AC.GT       | 7 | 120778886 | 120778903 | 9       | .                  | .         | intergenic | -0.24  | rs790480972   | . | 3 |
| AC.GT       | 7 | 120781867 | 120781878 | 6       | ENSSSCT00000002722 | .         | intron     | 0.389  | rs792259932   | . | 2 |
| AAAG.CTTT   | 7 | 120861596 | 120861614 | 4.75    | ENSSSCT00000002725 | GOLGA5    | intron     | 0.548  | 777680 rs7867 | . | 2 |
| AG.CT       | 7 | 120938954 | 120938976 | 11.5    | .                  | .         | intergenic | -0.174 | rs787053616   | . | 3 |
| AAAG.CTTT   | 7 | 121445941 | 121445953 | 3.25    | .                  | .         | intergenic | .      | 324888 rs7925 | . | 2 |
| AC.GT       | 7 | 121508309 | 121508319 | 5.5     | .                  | .         | intergenic | .      | rs707111398   | . | 2 |
| AG.CT       | 7 | 121602806 | 121602821 | 8       | .                  | .         | intergenic | .      | rs788305062   | . | 2 |
| AAAG.CTTT   | 7 | 121643942 | 121643956 | 3.75    | .                  | .         | intergenic | .      | rs792292088   | . | 2 |
| AATG.CATT   | 7 | 122917333 | 122917349 | 4.25    | ENSSSCT00000002757 | SERPINA5  | intron     | -0.354 | rs793655442   | . | 2 |
| AAAGC.GCTTT | 7 | 123009632 | 123009661 | 6       | .                  | .         | intergenic | .      | rs791438123   | . | 2 |
| AC.GT       | 7 | 123202464 | 123202482 | 9.5     | .                  | .         | intergenic | -0.035 | .             | . | 2 |
| AC.GT       | 7 | 123615942 | 123615952 | 5.5     | ENSSSCT00000022914 | DICER1    | intron     | -0.022 | .             | . | 2 |
| AAC.GTT     | 7 | 123686055 | 123686071 | 5.66667 | .                  | .         | intergenic | 0.116  | rs791349693   | . | 2 |
| AC.GT       | 7 | 123748341 | 123748353 | 6.5     | ENSSSCT00000002772 | CLMN      | intron     | -0.361 | rs790275812   | . | 3 |
| AC.GT       | 7 | 123993719 | 123993734 | 8       | .                  | .         | intergenic | -0.423 | rs793351392   | . | 2 |
| AAAG.CTTT   | 7 | 124052611 | 124052634 | 6       | .                  | .         | intergenic | .      | rs791943235   | . | 3 |
| AC.GT       | 7 | 124053705 | 124053716 | 6       | .                  | .         | intergenic | .      | rs788566625   | . | 5 |
| AT.AT       | 7 | 124063996 | 124064005 | 5       | .                  | .         | intergenic | .      | .             | . | 2 |
| AT.AT       | 7 | 124385943 | 124385952 | 5       | .                  | .         | intergenic | 0.002  | .             | . | 2 |
| AAC.GTT     | 7 | 124488720 | 124488731 | 4       | .                  | .         | intergenic | .      | rs789950489   | . | 2 |
| AAAC.GTTT   | 7 | 124796207 | 124796231 | 6.25    | ENSSSCT00000002780 | ATG2B     | intron     | 1.67   | 338726 rs7913 | . | 2 |
| AAC.GTT     | 7 | 124814030 | 124814049 | 6.66667 | ENSSSCT00000002780 | ATG2B     | intron     | 0.311  | rs792491171   | . | 2 |
| AAT.ATT     | 7 | 124938215 | 124938227 | 4.33333 | ENSSSCT00000002783 | PAPOLA    | intron     | -0.461 | rs792292858   | . | 2 |
| AAAAC.GTTTT | 7 | 125013031 | 125013051 | 4.2     | .                  | .         | intergenic | -0.176 | 133566 rs7932 | . | 2 |
| AAAAT.ATTTT | 7 | 125071859 | 125071877 | 3.8     | .                  | .         | intergenic | .      | rs786290760   | . | 2 |
| AC.GT       | 7 | 125130651 | 125130660 | 5       | .                  | .         | intergenic | -0.145 | rs789095348   | . | 2 |
| AC.GT       | 7 | 125172820 | 125172830 | 5.5     | .                  | .         | intergenic | -0.45  | rs788082700   | . | 2 |
| AC.GT       | 7 | 125647395 | 125647406 | 6       | .                  | .         | intergenic | -0.633 | .             | . | 2 |
| AC.GT       | 7 | 125670677 | 125670691 | 7.5     | .                  | .         | intergenic | .      | 195450 rs7901 | . | 2 |
| ATCC.GGAT   | 7 | 125677186 | 125677199 | 3.5     | .                  | .         | intergenic | .      | .             | . | 2 |
| AG.CT       | 7 | 126139060 | 126139084 | 12.5    | .                  | .         | intergenic | -0.277 | .             | . | 3 |
| AGAT.ATCT   | 7 | 126208243 | 126208259 | 4.25    | .                  | .         | intergenic | .      | rs792044989   | . | 2 |
| AAAT.ATTT   | 7 | 126544521 | 126544542 | 5.5     | .                  | .         | intergenic | -0.086 | 394609 rs7908 | . | 3 |
| AC.GT       | 7 | 126774510 | 126774526 | 8.5     | .                  | .         | intergenic | 0.078  | rs786974274   | . | 2 |
| AAAC.GTTT   | 7 | 127299998 | 127300012 | 3.75    | .                  | .         | intergenic | 0.072  | rs789334067   | . | 2 |
| AC.GT       | 7 | 127559636 | 127559649 | 7       | .                  | .         | intergenic | 1.584  | 799250 rs7893 | . | 2 |
| AAC.GTT     | 7 | 127741811 | 127741830 | 6.66667 | .                  | .         | intergenic | -0.215 | rs786571678   | . | 2 |
| AAGG.CCTT   | 7 | 127929222 | 127929237 | 4       | .                  | .         | intergenic | -0.188 | .             | . | 2 |
| AAAT.ATTT   | 7 | 128030543 | 128030556 | 3.5     | ENSSSCT00000002786 | SETD3     | intron     | .      | .             | . | 2 |
| AAGG.CCTT   | 7 | 128052763 | 128052782 | 5       | ENSSSCT00000002787 | CCNK      | intron     | 0.065  | rs789299568   | . | 2 |
| AG.CT       | 7 | 128272133 | 128272145 | 6.5     | ENSSSCT00000002788 | CYP46A1   | intron     | -0.237 | rs790335550   | . | 3 |
| AAAC.GTTT   | 7 | 128447835 | 128447849 | 3.75    | .                  | .         | intergenic | 0.217  | rs786889822   | . | 2 |
| AAAC.GTTT   | 7 | 128888878 | 128888900 | 5.75    | ENSSSCT00000002802 | CDC42BPE  | promoter   | -0.581 | rs791110180   | . | 2 |
| AC.GT       | 7 | 129025743 | 129025752 | 5       | .                  | .         | intergenic | -0.094 | rs790845321   | . | 2 |
| AT.AT       | 7 | 129066331 | 129066341 | 5.5     | .                  | .         | intergenic | 2.489  | .             | . | 3 |
| AC.GT       | 7 | 129072132 | 129072142 | 5.5     | ENSSSCT00000002805 | RCOR1     | intron     | 2.111  | rs792203310   | . | 2 |
| AC.GT       | 7 | 129118119 | 129118133 | 7.5     | ENSSSCT00000002805 | RCOR1     | intron     | .      | .             | . | 4 |
| AAAAT.ATTTT | 7 | 129178625 | 129178654 | 6       | ENSSSCT00000002805 | RCOR1     | intron     | .      | rs788332471   | . | 2 |
| AAAAC.GTTTT | 7 | 129368763 | 129368785 | 3.83333 | .                  | .         | intergenic | .      | rs792026412   | . | 2 |
| AAC.GTT     | 7 | 129992918 | 129992933 | 5.33333 | ENSSSCT00000002821 | PPP2R5C   | intron     | 0      | 127888 rs7873 | . | 2 |
| AC.GT       | 7 | 130495363 | 130495372 | 5       | .                  | .         | intergenic | .      | rs789054591   | . | 2 |
| AGC.GCT     | 7 | 130796553 | 130796565 | 4.33333 | .                  | .         | intergenic | .      | rs786330619   | . | 2 |
| AAAC.GTTT   | 7 | 131042022 | 131042048 | 6.75    | ENSSSCT00000002836 | TDRD9     | intron     | -0.123 | rs697285782   | . | 2 |
| AAT.ATT     | 7 | 133000423 | 133000443 | 7       | .                  | .         | intergenic | .      | rs788679408   | . | 2 |
| AG.CT       | 7 | 133514794 | 133514827 | 17      | .                  | .         | intergenic | .      | 386838 rs7937 | . | 2 |
| AAAAT.ATTTT | 7 | 133564107 | 133564132 | 5.2     | .                  | .         | intergenic | -0.003 | rs791577872   | . | 2 |
| AAAT.ATTT   | 7 | 133969000 | 133969017 | 4.5     | ENSSSCT00000002907 | EFHC1     | intron     | .      | 355506 rs7906 | . | 2 |
| AG.CT       | 7 | 134204752 | 134204766 | 7.5     | .                  | .         | intergenic | 0.165  | 320582 rs7883 | . | 2 |
| AAGG.CCTT   | 7 | 134364074 | 134364091 | 4.5     | ENSSSCT00000024099 | .         | intron     | 0.146  | .             | . | 2 |
| AC.GT       | 7 | 134431791 | 134431813 | 11.5    | ENSSSCT00000002916 | ICK       | intron     | 0.1    | rs792987054   | . | 2 |
| AAAAC.GTTTT | 8 | 103716    | 103741    | 4.33333 | ENSSSCT00000030851 | PCGF3     | intron     | .      | 301085 rs7879 | . | 2 |
| AC.GT       | 8 | 162382    | 162404    | 11.5    | ENSSSCT00000026976 | MFSD7     | intron     | 0.623  | 356902 rs7885 | . | 3 |
| AAAAT.ATTTT | 8 | 573418    | 573437    | 4       | ENSSSCT00000009498 | NELFA     | intron     | -0.126 | 378410 rs7915 | . | 2 |
| AAAAT.ATTTT | 8 | 573418    | 573437    | 4       | ENSSSCT00000009501 | POLN      | intron     | -0.126 | 378410 rs7915 | . | 2 |
| AAAC.GTTT   | 8 | 611273    | 611297    | 6.25    | ENSSSCT00000009498 | NELFA     | intron     | .      | 338194 rs7918 | . | 2 |
| AAAC.GTTT   | 8 | 611273    | 611297    | 6.25    | ENSSSCT00000009501 | POLN      | intron     | .      | 338194 rs7918 | . | 2 |
| AAAC.GTTT   | 8 | 957403    | 957423    | 5.25    | .                  | .         | intergenic | -0.047 | rs788408460   | . | 2 |
| AAAC.GTTT   | 8 | 1213801   | 1213820   | 5       | ENSSSCT00000009510 | ADD1      | intron     | .      | rs793745503   | . | 2 |
| AC.GT       | 8 | 1504872   | 1504886   | 7.5     | ENSSSCT00000009515 | IUNTINGTI | intron     | 0.937  | 325245 rs7881 | . | 2 |
| AAAG.CTTT   | 8 | 2281887   | 2281902   | 4       | .                  | .         | intergenic | -0.254 | .             | . | 2 |
| AAC.GTT     | 8 | 2552390   | 2552407   | 6       | ENSSSCT00000009528 | C4orf50   | intron     | -0.034 | rs789321351   | . | 2 |
| AAAAC.GTTTT | 8 | 2724824   | 2724847   | 4.8     | .                  | .         | intergenic | -0.21  | 335476 rs7883 | . | 4 |
| AAAC.GTTT   | 8 | 2743168   | 2743184   | 4.25    | .                  | .         | intergenic | .      | rs792868142   | . | 3 |
| AAAC.GTTT   | 8 | 4022811   | 4022829   | 4.75    | .                  | .         | intergenic | .      | .             | . | 2 |
| AAAC.GTTT   | 8 | 4097828   | 4097839   | 3       | .                  | .         | intergenic | -0.354 | rs792038696   | . | 2 |

|              |   |          |          |         |                    |        |            |        |               |   |
|--------------|---|----------|----------|---------|--------------------|--------|------------|--------|---------------|---|
| AC.GT        | 8 | 4258208  | 4258217  | 5       | ENSSSCT00000009541 | ABLIM2 | intron     | -1.261 | .             | 2 |
| AAAG.CTTT    | 8 | 4727635  | 4727670  | 9       | .                  | .      | intergenic | .      | rs792746792   | 3 |
| ACAT.ATGT    | 8 | 4821957  | 4821971  | 3.75    | .                  | .      | intergenic | 0.022  | .             | 2 |
| AATG.CATT    | 8 | 4899252  | 4899281  | 7.5     | ENSSSCT00000023202 | STK32B | intron     | -0.107 | 770211 rs7936 | 2 |
| AG.CT        | 8 | 5168439  | 5168449  | 5.5     | .                  | .      | intergenic | -0.377 | 144858 rs7878 | 2 |
| AC.GT        | 8 | 5366570  | 5366580  | 5.5     | .                  | .      | intergenic | -0.123 | .             | 2 |
| AAAC.GTTT    | 8 | 5392620  | 5392641  | 5.5     | .                  | .      | intergenic | .      | 731574 rs7900 | 2 |
| AAAC.GTTT    | 8 | 5458392  | 5458414  | 5.75    | .                  | .      | intergenic | -0.24  | rs793644552   | 2 |
| AC.GT        | 8 | 5566139  | 5566153  | 7.5     | ENSSSCT00000031128 | .      | intron     | .      | .             | 3 |
| AAC.GTT      | 8 | 5566921  | 5566937  | 5.66667 | ENSSSCT00000031128 | .      | intron     | .      | .             | 4 |
| AT.AT        | 8 | 6000740  | 6000756  | 8.5     | .                  | .      | intergenic | .      | .             | 2 |
| AAAT.ATTT    | 8 | 6011302  | 6011320  | 4.75    | .                  | .      | intergenic | .      | rs788046244   | 2 |
| AG.CT        | 8 | 6080014  | 6080023  | 5       | .                  | .      | intergenic | -0.33  | rs792649347   | 2 |
| AAAC.GTTT    | 8 | 6227302  | 6227331  | 7.5     | .                  | .      | intergenic | .      | 385884 rs7863 | 2 |
| AC.GT        | 8 | 6560000  | 6560015  | 8       | .                  | .      | intergenic | -0.012 | rs788437266   | 2 |
| AAACC.GGTTT  | 8 | 6605551  | 6605581  | 6.2     | .                  | .      | intergenic | 0.148  | rs786246493   | 2 |
| AAAAAT.ATTTT | 8 | 6627481  | 6627499  | 3.8     | .                  | .      | intergenic | -0.169 | rs790674358   | 2 |
| AC.GT        | 8 | 7073483  | 7073498  | 8       | .                  | .      | intergenic | -0.384 | rs789145751   | 5 |
| AAC.GTT      | 8 | 7330998  | 7331009  | 4       | .                  | .      | intergenic | -0.268 | .             | 2 |
| AT.AT        | 8 | 7520519  | 7520537  | 9.5     | .                  | .      | intergenic | .      | 762279 rs7890 | 2 |
| AC.GT        | 8 | 7635693  | 7635705  | 6.5     | .                  | .      | intergenic | 0.047  | rs793072992   | 2 |
| AC.GT        | 8 | 7783158  | 7783168  | 5.5     | .                  | .      | intergenic | 0.022  | .             | 2 |
| AT.AT        | 8 | 7897135  | 7897144  | 5       | .                  | .      | intergenic | .      | rs793297160   | 2 |
| AAAAC.GTTTT  | 8 | 7910390  | 7910408  | 3.8     | .                  | .      | intergenic | .      | 333686 rs7868 | 2 |
| ATC.GAT      | 8 | 7978829  | 7978843  | 5       | .                  | .      | intergenic | .      | .             | 2 |
| AAAAAT.ATTTT | 8 | 7984825  | 7984842  | 3       | .                  | .      | intergenic | -0.139 | 284011 rs7890 | 2 |
| AATG.CATT    | 8 | 8077223  | 8077245  | 5.75    | .                  | .      | intergenic | -0.06  | rs790678444   | 2 |
| ATC.GAT      | 8 | 8125259  | 8125271  | 4.33333 | .                  | .      | intergenic | -0.236 | .             | 2 |
| AC.GT        | 8 | 8131414  | 8131430  | 8.5     | .                  | .      | intergenic | 0.446  | .             | 5 |
| AATG.CATT    | 8 | 8356983  | 8357009  | 6.75    | .                  | .      | intergenic | -0.129 | 100683 rs7904 | 2 |
| AT.AT        | 8 | 8809172  | 8809184  | 6.5     | .                  | .      | intergenic | -0.001 | .             | 2 |
| AAAAT.ATTTT  | 8 | 8852903  | 8852920  | 3.6     | .                  | .      | intergenic | -0.338 | rs790981685   | 2 |
| AC.GT        | 8 | 8857301  | 8857315  | 7.5     | .                  | .      | intergenic | -0.3   | rs791776419   | 2 |
| AT.AT        | 8 | 8861207  | 8861217  | 5.5     | .                  | .      | intergenic | .      | .             | 2 |
| AC.GT        | 8 | 8901442  | 8901451  | 5       | .                  | .      | intergenic | 0.015  | rs788436326   | 2 |
| AAAC.GTTT    | 8 | 8920975  | 8920994  | 5       | .                  | .      | intergenic | .      | .             | 2 |
| AAAG.CTTT    | 8 | 8935103  | 8935120  | 4.5     | .                  | .      | intergenic | -0.085 | 312308 rs7936 | 2 |
| ATC.GAT      | 8 | 8962885  | 8962896  | 4       | .                  | .      | intergenic | -0.067 | .             | 3 |
| AAAC.GTTT    | 8 | 9257368  | 9257389  | 5.5     | .                  | .      | intergenic | -0.187 | rs786243889   | 2 |
| AG.CT        | 8 | 9278730  | 9278751  | 11      | .                  | .      | intergenic | -0.121 | rs790807686   | 2 |
| AAAT.ATTT    | 8 | 9285613  | 9285632  | 5       | .                  | .      | intergenic | 0.128  | rs790897552   | 2 |
| AT.AT        | 8 | 9469125  | 9469138  | 7       | .                  | .      | intergenic | 0.081  | rs786481795   | 2 |
| AC.GT        | 8 | 9640439  | 9640448  | 5       | .                  | .      | intergenic | -0.155 | rs790195973   | 2 |
| ATCC.GGAT    | 8 | 9786566  | 9786583  | 4.5     | .                  | .      | intergenic | -0.021 | .             | 2 |
| AT.AT        | 8 | 9867748  | 9867757  | 5       | ENSSSCT00000009556 | CPEB2  | intron     | -0.04  | rs789586651   | 2 |
| AAC.GTT      | 8 | 10538117 | 10538141 | 8.33333 | ENSSSCT00000009559 | CC2D2A | intron     | -0.038 | 376686 rs7908 | 2 |
| AAAC.GTTT    | 8 | 10548554 | 10548576 | 5.75    | .                  | .      | intergenic | .      | rs789722395   | 2 |
| AG.CT        | 8 | 10574320 | 10574333 | 7       | ENSSSCT00000009562 | FBXL5  | intron     | .      | rs788624803   | 2 |
| AAAC.GTTT    | 8 | 10616020 | 10616033 | 3.5     | .                  | .      | intergenic | 0.352  | rs791014019   | 2 |
| AG.CT        | 8 | 10657081 | 10657095 | 7.5     | .                  | .      | intergenic | .      | rs789562259   | 3 |
| AGAGG.CCTCT  | 8 | 10739734 | 10739760 | 5.4     | ENSSSCT00000009565 | CD38   | intron     | -0.115 | rs787578552   | 2 |
| AC.GT        | 8 | 10959894 | 10959910 | 8.5     | ENSSSCT00000009568 | PROM1  | intron     | -0.069 | rs791637446   | 3 |
| AAAT.ATTT    | 8 | 11142113 | 11142131 | 4.75    | .                  | .      | intergenic | .      | rs788538426   | 2 |
| AAAAT.ATTTT  | 8 | 11242101 | 11242125 | 5       | .                  | .      | intergenic | -0.403 | rs793725577   | 2 |
| AAAC.GTTT    | 8 | 11279596 | 11279610 | 3.75    | .                  | .      | intergenic | .      | rs793720867   | 2 |
| AAAC.GTTT    | 8 | 11477368 | 11477386 | 4.75    | ENSSSCT00000025105 | LDB2   | intron     | -0.16  | 162292 rs7869 | 3 |
| AATG.CATT    | 8 | 11519134 | 11519151 | 4.5     | ENSSSCT00000025105 | LDB2   | intron     | -0.038 | .             | 4 |
| AAAC.GTTT    | 8 | 11520864 | 11520886 | 5.75    | ENSSSCT00000025105 | LDB2   | intron     | 0.155  | rs792508393   | 2 |
| AAG.CTT      | 8 | 11819573 | 11819584 | 4       | .                  | .      | intergenic | -0.24  | 377247 rs7913 | 2 |
| AT.AT        | 8 | 12278627 | 12278636 | 5       | .                  | .      | intergenic | .      | .             | 2 |
| AG.CT        | 8 | 12365825 | 12365856 | 16      | ENSSSCT00000024457 | CLRN2  | intron     | 0.062  | rs788705339   | 2 |
| AC.GT        | 8 | 12548122 | 12548133 | 6       | .                  | .      | intergenic | 0.794  | .             | 3 |
| AT.AT        | 8 | 12568096 | 12568106 | 5.5     | ENSSSCT00000009570 | NCAPG  | intron     | 0.083  | rs791056354   | 3 |
| AAAG.CTTT    | 8 | 12777855 | 12777879 | 6.25    | .                  | .      | intergenic | -0.14  | 394587 rs7926 | 2 |
| AG.CT        | 8 | 13073070 | 13073082 | 6.5     | .                  | .      | intergenic | -0.033 | rs792158817   | 3 |
| AG.CT        | 8 | 13136208 | 13136234 | 13.5    | .                  | .      | intergenic | 0.223  | rs792267914   | 2 |
| AT.AT        | 8 | 13300914 | 13300924 | 5.5     | .                  | .      | intergenic | -0.084 | rs790869032   | 2 |
| AC.GT        | 8 | 13418911 | 13418923 | 6.5     | .                  | .      | intergenic | 0.096  | rs790111261   | 2 |
| AAAG.CTTT    | 8 | 13435501 | 13435517 | 4.25    | .                  | .      | intergenic | .      | 290605 rs7901 | 2 |
| AG.CT        | 8 | 13559638 | 13559673 | 18      | .                  | .      | intergenic | 0.304  | rs791942511   | 2 |
| AAG.CTT      | 8 | 14112921 | 14112935 | 5       | .                  | .      | intergenic | -0.27  | .             | 2 |
| AAAAC.GTTTT  | 8 | 14125969 | 14125999 | 6.2     | .                  | .      | intergenic | .      | rs792783936   | 2 |
| AATG.CATT    | 8 | 14286018 | 14286044 | 6.75    | .                  | .      | intergenic | -0.281 | rs788597653   | 2 |
| AT.AT        | 8 | 14332046 | 14332055 | 5       | .                  | .      | intergenic | -0.153 | rs788325070   | 3 |
| AT.AT        | 8 | 14412006 | 14412022 | 8.5     | .                  | .      | intergenic | -0.002 | .             | 2 |
| AAT.ATT      | 8 | 14549699 | 14549717 | 6.33333 | .                  | .      | intergenic | -0.049 | rs791147045   | 2 |
| AC.GT        | 8 | 14662630 | 14662640 | 5.5     | .                  | .      | intergenic | 0.035  | 370377 rs7932 | 2 |
| AC.GT        | 8 | 14792846 | 14792862 | 8.5     | .                  | .      | intergenic | 0.215  | .             | 2 |
| AAC.GTT      | 8 | 14894805 | 14894818 | 4.66667 | .                  | .      | intergenic | -0.008 | rs787181271   | 3 |
| AAAT.ATTT    | 8 | 14980246 | 14980260 | 3.75    | .                  | .      | intergenic | .      | rs787451274   | 2 |
| AAAG.CTTT    | 8 | 15018840 | 15018863 | 6       | .                  | .      | intergenic | 1.185  | rs789204400   | 2 |
| AAAC.GTTT    | 8 | 15194638 | 15194655 | 4.5     | .                  | .      | intergenic | 0.861  | 336823 rs7925 | 2 |
| AG.CT        | 8 | 15407248 | 15407260 | 6.5     | ENSSSCT00000009572 | SLIT2  | intron     | -0.212 | 286562 rs7867 | 2 |
| AG.CT        | 8 | 15481343 | 15481352 | 5       | ENSSSCT00000030135 | KCNIP4 | intron     | .      | .             | 2 |

|              |   |          |          |         |                    |        |            |        |                    |   |
|--------------|---|----------|----------|---------|--------------------|--------|------------|--------|--------------------|---|
| AG.CT        | 8 | 15481343 | 15481352 | 5       | ENSSSCT00000031079 | KCNIP4 | intron     | .      | .                  | 2 |
| AAAC.GTTT    | 8 | 15495103 | 15495117 | 3.75    | ENSSSCT00000030135 | KCNIP4 | intron     | .      | rs787261368        | 2 |
| AAAC.GTTT    | 8 | 15495103 | 15495117 | 3.75    | ENSSSCT00000031079 | KCNIP4 | intron     | .      | rs787261368        | 2 |
| AG.CT        | 8 | 15512533 | 15512544 | 6       | ENSSSCT00000030135 | KCNIP4 | intron     | 0.015  | rs793019907        | 3 |
| AAAAC.GTTTT  | 8 | 15515348 | 15515366 | 3.8     | ENSSSCT00000030135 | KCNIP4 | intron     | -0.17  | rs786981797        | 2 |
| AAAT.ATTT    | 8 | 15569492 | 15569510 | 4.75    | ENSSSCT00000030135 | KCNIP4 | intron     | .      | .                  | 2 |
| \AAAAC.GTTTT | 8 | 15744933 | 15744954 | 3.66667 | .                  | .      | intergenic | -0.045 | .                  | 2 |
| AAC.GTT      | 8 | 16007359 | 16007373 | 5       | .                  | .      | intergenic | .      | .                  | 4 |
| AT.AT        | 8 | 16009913 | 16009926 | 7       | .                  | .      | intergenic | -0.191 | rs791720466        | 2 |
| AAT.ATT      | 8 | 16152778 | 16152790 | 4.33333 | .                  | .      | intergenic | -0.149 | rs791720466        | 2 |
| AAAAC.GTTTT  | 8 | 16448889 | 16448914 | 5.2     | .                  | .      | intergenic | 0.044  | rs788953206        | 2 |
| \AAAAC.GTTTT | 8 | 16486685 | 16486707 | 3.83333 | .                  | .      | intergenic | -0.255 | rs790223651        | 2 |
| AC.GT        | 8 | 16576985 | 16576999 | 7.5     | .                  | .      | intergenic | .      | .                  | 3 |
| AC.GT        | 8 | 16664700 | 16664715 | 8       | .                  | .      | intergenic | -0.165 | .                  | 3 |
| AAAT.ATTT    | 8 | 16751030 | 16751045 | 4       | .                  | .      | intergenic | -0.009 | rs791634499        | 3 |
| AAAT.ATTT    | 8 | 16817119 | 16817139 | 5.25    | .                  | .      | intergenic | 0.274  | rs789639713        | 2 |
| AT.AT        | 8 | 17014834 | 17014845 | 6       | .                  | .      | intergenic | .      | rs792813563        | 2 |
| AC.GT        | 8 | 17068274 | 17068300 | 13.5    | .                  | .      | intergenic | -0.064 | rs691364496        | 3 |
| AG.CT        | 8 | 17324914 | 17324928 | 7.5     | .                  | .      | intergenic | 1.491  | rs793174631        | 3 |
| AC.GT        | 8 | 17364014 | 17364028 | 7.5     | .                  | .      | intergenic | 0.148  | rs79288 rs7869     | 2 |
| AC.GT        | 8 | 17390595 | 17390613 | 9.5     | .                  | .      | intergenic | -0.012 | .                  | 4 |
| AAC.GTT      | 8 | 17391399 | 17391414 | 5.33333 | .                  | .      | intergenic | 0.53   | rs791426 rs7907    | 2 |
| AT.AT        | 8 | 17481785 | 17481800 | 8       | .                  | .      | intergenic | 0.107  | rs788694877        | 2 |
| \GATAT.ATATC | 8 | 17505744 | 17505776 | 5.5     | .                  | .      | intergenic | -0.08  | .                  | 2 |
| ATC.GAT      | 8 | 17578811 | 17578825 | 5       | .                  | .      | intergenic | -0.071 | .                  | 2 |
| AAT.ATT      | 8 | 17578906 | 17578918 | 4.33333 | .                  | .      | intergenic | -0.165 | .                  | 2 |
| AAC.GTT      | 8 | 17626645 | 17626658 | 4.66667 | .                  | .      | intergenic | -0.243 | rs7905918 rs7866   | 2 |
| AT.AT        | 8 | 17664634 | 17664643 | 5       | .                  | .      | intergenic | -0.072 | .                  | 2 |
| ATC.GAT      | 8 | 17806984 | 17807009 | 8.66667 | .                  | .      | intergenic | -0.046 | .                  | 2 |
| AAAC.GTTT    | 8 | 17817029 | 17817043 | 3.75    | .                  | .      | intergenic | -0.148 | rs7909814 rs7912   | 2 |
| AAAT.ATTT    | 8 | 17832309 | 17832323 | 3.75    | .                  | .      | intergenic | 0.134  | rs79241872 rs7886  | 2 |
| AC.GT        | 8 | 17959664 | 17959676 | 6.5     | .                  | .      | intergenic | 0.674  | rs79116669 rs7898  | 3 |
| AC.GT        | 8 | 18160846 | 18160864 | 9.5     | .                  | .      | intergenic | 0.729  | rs789859480        | 2 |
| AC.GT        | 8 | 18237884 | 18237895 | 6       | .                  | .      | intergenic | 1.872  | rs792177477        | 2 |
| AAC.GTT      | 8 | 18258098 | 18258110 | 4.33333 | .                  | .      | intergenic | 0.045  | rs787417637        | 2 |
| AT.AT        | 8 | 18307235 | 18307250 | 8       | .                  | .      | intergenic | -0.184 | .                  | 3 |
| ACC.GGT      | 8 | 18396171 | 18396186 | 5.33333 | .                  | .      | intergenic | -0.087 | rs790702842129     | 2 |
| AAT.ATT      | 8 | 18580959 | 18580983 | 8.33333 | .                  | .      | intergenic | 0.091  | rs790156901        | 2 |
| AT.AT        | 8 | 18732503 | 18732519 | 8.5     | .                  | .      | intergenic | -0.043 | .                  | 2 |
| AAAC.GTTT    | 8 | 18901808 | 18901822 | 3.75    | ENSSSCT00000009580 | DHX15  | intron     | -0.271 | rs793479569        | 2 |
| AGG.CCT      | 8 | 18978151 | 18978165 | 5       | .                  | .      | intergenic | 1.254  | .                  | 2 |
| AAG.CTT      | 8 | 19008672 | 19008696 | 8.33333 | .                  | .      | intergenic | 0.805  | rs791012265        | 2 |
| AG.CT        | 8 | 19323602 | 19323614 | 6.5     | .                  | .      | intergenic | -0.269 | rs791129488        | 3 |
| AC.GT        | 8 | 19349382 | 19349396 | 7.5     | ENSSSCT00000029731 | .      | intron     | 0.095  | rs786377930        | 2 |
| \AAAAC.GTTTT | 8 | 19392159 | 19392196 | 6.33333 | .                  | .      | intergenic | .      | rs792756504        | 3 |
| AG.CT        | 8 | 19513361 | 19513370 | 5       | .                  | .      | intergenic | .      | rs790471182        | 2 |
| AAAAC.GTTTT  | 8 | 20004343 | 20004366 | 4.8     | .                  | .      | intergenic | .      | rs788829420        | 2 |
| AAT.ATT      | 8 | 20237194 | 20237210 | 5.66667 | .                  | .      | intergenic | .      | rs790676517        | 2 |
| AT.AT        | 8 | 20296437 | 20296448 | 6       | .                  | .      | intergenic | -0.024 | rs786713885        | 2 |
| AAGG.CCTT    | 8 | 20321129 | 20321154 | 6.5     | .                  | .      | intergenic | .      | .                  | 2 |
| ACC.GGT      | 8 | 20347052 | 20347065 | 4.66667 | .                  | .      | intergenic | 0.046  | rs792307824        | 2 |
| AAAC.GTTT    | 8 | 20429002 | 20429020 | 4.75    | .                  | .      | intergenic | 0.171  | rs79098077 rs7889  | 2 |
| AAT.ATT      | 8 | 20469968 | 20469980 | 4.33333 | ENSSSCT00000023054 | RBPJ   | intron     | 0.129  | rs79150810 rs6904  | 3 |
| AAC.GTT      | 8 | 20761461 | 20761474 | 4.66667 | .                  | .      | intergenic | 0.077  | rs791846051        | 2 |
| AT.AT        | 8 | 20780429 | 20780440 | 6       | .                  | .      | intergenic | 0.107  | rs787684610        | 2 |
| AAAC.GTTT    | 8 | 20813320 | 20813342 | 5.75    | .                  | .      | intergenic | 0.219  | rs791568598        | 2 |
| AT.AT        | 8 | 20905891 | 20905901 | 5.5     | .                  | .      | intergenic | .      | .                  | 4 |
| AT.AT        | 8 | 21071268 | 21071278 | 5.5     | .                  | .      | intergenic | -0.058 | rs789821039        | 2 |
| AGGG.CCCT    | 8 | 21189686 | 21189711 | 6.5     | .                  | .      | intergenic | -0.155 | rs790353653 rs7881 | 2 |
| AAC.GTT      | 8 | 21539138 | 21539156 | 6.33333 | .                  | .      | intergenic | -0.097 | rs79040445 rs7870  | 2 |
| AAAAC.GTTTT  | 8 | 21656833 | 21656854 | 4.4     | .                  | .      | intergenic | -0.228 | rs790917211        | 2 |
| ACAT.ATGT    | 8 | 21754505 | 21754517 | 3.25    | .                  | .      | intergenic | 0.099  | rs789773229        | 2 |
| AAAC.GTTT    | 8 | 21894215 | 21894227 | 3.25    | .                  | .      | intergenic | -0.114 | rs786890984        | 4 |
| AC.GT        | 8 | 22079162 | 22079203 | 21      | .                  | .      | intergenic | -0.091 | rs790370618 rs7927 | 3 |
| AT.AT        | 8 | 22133785 | 22133794 | 5       | .                  | .      | intergenic | .      | .                  | 3 |
| AAT.ATT      | 8 | 22188500 | 22188515 | 5.33333 | .                  | .      | intergenic | 0.068  | .                  | 2 |
| AT.AT        | 8 | 22337656 | 22337665 | 5       | .                  | .      | intergenic | 0.015  | .                  | 2 |
| AC.GT        | 8 | 22379794 | 22379803 | 5       | .                  | .      | intergenic | 0.043  | rs793753928        | 2 |
| AAAC.GTTT    | 8 | 22399964 | 22399985 | 5.5     | .                  | .      | intergenic | -0.31  | rs792277616        | 3 |
| AAAT.ATTT    | 8 | 22674705 | 22674727 | 5.75    | .                  | .      | intergenic | -0.139 | rs79113493605      | 4 |
| AAAC.GTTT    | 8 | 22955070 | 22955094 | 6.25    | .                  | .      | intergenic | .      | rs79143056 rs7883  | 2 |
| AAAC.GTTT    | 8 | 23063662 | 23063678 | 4.25    | .                  | .      | intergenic | 0.074  | rs79093149 rs7916  | 2 |
| AC.GT        | 8 | 23082991 | 23083007 | 8.5     | .                  | .      | intergenic | 0.301  | .                  | 3 |
| AG.CT        | 8 | 23083688 | 23083698 | 5.5     | .                  | .      | intergenic | -0.199 | rs790708205747     | 2 |
| AAAT.ATTT    | 8 | 23104894 | 23104916 | 5.75    | .                  | .      | intergenic | -0.066 | rs790396527 rs7882 | 2 |
| AAG.CTT      | 8 | 23161014 | 23161030 | 5.66667 | .                  | .      | intergenic | .      | rs790355530 rs7927 | 2 |
| AC.GT        | 8 | 23270478 | 23270488 | 5.5     | .                  | .      | intergenic | 0.02   | .                  | 2 |
| AG.CT        | 8 | 23272861 | 23272873 | 6.5     | .                  | .      | intergenic | .      | rs79159799 rs7893  | 3 |
| AGAT.ATCT    | 8 | 23301252 | 23301278 | 6.75    | .                  | .      | intergenic | -0.223 | rs790309091 rs7899 | 2 |
| AG.CT        | 8 | 23303803 | 23303817 | 7.5     | .                  | .      | intergenic | -0.004 | rs790793085390     | 2 |
| AAAC.GTTT    | 8 | 23311129 | 23311152 | 6       | .                  | .      | intergenic | 0.301  | rs79095233 rs7909  | 2 |
| AAC.GTT      | 8 | 23338330 | 23338346 | 5.66667 | .                  | .      | intergenic | -0.212 | rs790353831 rs7930 | 2 |
| AAAAC.GTTTT  | 8 | 23342321 | 23342339 | 3.8     | .                  | .      | intergenic | 0.025  | rs790327873 rs7926 | 2 |
| AC.GT        | 8 | 23485109 | 23485125 | 8.5     | .                  | .      | intergenic | .      | rs79150187 rs7891  | 2 |



|             |   |          |          |         |                    |            |            |        |               |   |
|-------------|---|----------|----------|---------|--------------------|------------|------------|--------|---------------|---|
| AAAC.GTTT   | 8 | 23530389 | 23530419 | 7.75    | .                  | .          | intergenic | -0.262 | rs788232629   | 5 |
| AAAT.ATTT   | 8 | 23531315 | 23531330 | 4       | .                  | .          | intergenic | 0.729  | 157759 rs7900 | 2 |
| AC.GT       | 8 | 23533563 | 23533575 | 6.5     | .                  | .          | intergenic | .      | rs790756805   | 2 |
| AC.GT       | 8 | 23721038 | 23721051 | 7       | .                  | .          | intergenic | -0.22  | rs786453055   | 2 |
| AAAAC.GTTTT | 8 | 23728779 | 23728816 | 7.6     | .                  | .          | intergenic | -0.002 | rs788537010   | 2 |
| AAAT.ATTT   | 8 | 23836080 | 23836098 | 4.75    | .                  | .          | intergenic | 0.026  | 382235 rs7881 | 2 |
| AT.AT       | 8 | 24284282 | 24284292 | 5.5     | .                  | .          | intergenic | -0.141 | 156301 rs7893 | 3 |
| AAAT.ATTT   | 8 | 24285174 | 24285198 | 6.25    | .                  | .          | intergenic | 0.045  | 200550 rs7876 | 2 |
| AG.CT       | 8 | 24309288 | 24309297 | 5       | .                  | .          | intergenic | -0.053 | .             | 2 |
| AG.CT       | 8 | 24397961 | 24397973 | 6.5     | .                  | .          | intergenic | -0.057 | 346995 rs7886 | 4 |
| AAAC.GTTT   | 8 | 24423738 | 24423760 | 5.75    | .                  | .          | intergenic | 0.472  | rs792785548   | 2 |
| AAT.ATT     | 8 | 24434067 | 24434084 | 6       | .                  | .          | intergenic | -0.106 | 347135 rs7932 | 2 |
| AT.AT       | 8 | 24458867 | 24458876 | 5       | .                  | .          | intergenic | 0.064  | .             | 2 |
| AAAC.GTTT   | 8 | 24460720 | 24460737 | 4.5     | .                  | .          | intergenic | -0.088 | 331541 rs7936 | 2 |
| AC.GT       | 8 | 24614928 | 24614959 | 16      | .                  | .          | intergenic | 0.281  | 314137 rs7870 | 2 |
| AC.GT       | 8 | 24660213 | 24660222 | 5       | .                  | .          | intergenic | 0.72   | rs787476598   | 2 |
| AC.GT       | 8 | 25037044 | 25037058 | 7.5     | .                  | .          | intergenic | 0.557  | 356209 rs7872 | 2 |
| AT.AT       | 8 | 25201314 | 25201331 | 9       | .                  | .          | intergenic | -0.08  | rs790811561   | 2 |
| AC.GT       | 8 | 25226314 | 25226323 | 5       | .                  | .          | intergenic | -0.07  | rs788683554   | 2 |
| AAT.ATT     | 8 | 25284207 | 25284235 | 9.66667 | .                  | .          | intergenic | 0.036  | 385941 rs7881 | 2 |
| AAG.CTT     | 8 | 25308246 | 25308262 | 5.66667 | .                  | .          | intergenic | 0.426  | rs788333189   | 2 |
| AT.AT       | 8 | 25377397 | 25377406 | 5       | .                  | .          | intergenic | 0.161  | rs793755109   | 4 |
| AC.GT       | 8 | 26081711 | 26081723 | 6.5     | .                  | .          | intergenic | .      | rs792789401   | 2 |
| AAAG.CTTT   | 8 | 26252523 | 26252536 | 3.5     | .                  | .          | intergenic | 0.035  | 754489 rs7894 | 2 |
| AC.GT       | 8 | 26283491 | 26283505 | 7.5     | .                  | .          | intergenic | -0.27  | .             | 3 |
| AT.AT       | 8 | 26512327 | 26512336 | 5       | .                  | .          | intergenic | -0.072 | rs701813559   | 2 |
| AAAC.GTTT   | 8 | 26516911 | 26516942 | 8       | .                  | .          | intergenic | .      | rs793586506   | 2 |
| AG.CT       | 8 | 26532775 | 26532789 | 7.5     | .                  | .          | intergenic | -0.016 | rs789979221   | 2 |
| AC.GT       | 8 | 26579419 | 26579435 | 8.5     | .                  | .          | intergenic | -0.156 | .             | 2 |
| AAAC.GTTT   | 8 | 26617082 | 26617111 | 7.5     | .                  | .          | intergenic | -0.126 | 170801 rs7906 | 3 |
| AAAC.GTTT   | 8 | 26630224 | 26630250 | 6.75    | .                  | .          | intergenic | .      | rs786725408   | 2 |
| AAC.GTT     | 8 | 26631069 | 26631082 | 4.66667 | .                  | .          | intergenic | .      | rs792214389   | 2 |
| AATG.CATT   | 8 | 26819972 | 26819983 | 3       | .                  | .          | intergenic | .      | rs793597849   | 3 |
| AAAAC.GTTTT | 8 | 26982051 | 26982074 | 4.8     | .                  | .          | intergenic | -0.054 | 303331 rs7875 | 2 |
| AG.CT       | 8 | 26987922 | 26987932 | 5.5     | .                  | .          | intergenic | -0.035 | .             | 3 |
| AAAAC.GTTTT | 8 | 26991507 | 26991535 | 5.8     | .                  | .          | intergenic | -0.051 | rs786595901   | 2 |
| AAT.ATT     | 8 | 27059365 | 27059378 | 4.66667 | .                  | .          | intergenic | -0.124 | rs792864442   | 3 |
| AT.AT       | 8 | 27086197 | 27086206 | 5       | .                  | .          | intergenic | -0.162 | 399843 rs7887 | 2 |
| AAC.GTT     | 8 | 27101102 | 27101124 | 7.66667 | .                  | .          | intergenic | -0.039 | 395958 rs7894 | 4 |
| AAAT.ATTT   | 8 | 27140914 | 27140927 | 3.5     | .                  | .          | intergenic | 0.047  | rs789346556   | 2 |
| AAAC.GTTT   | 8 | 27305404 | 27305423 | 5       | .                  | .          | intergenic | .      | rs790881240   | 2 |
| AAAT.ATTT   | 8 | 27421998 | 27422011 | 3.5     | .                  | .          | intergenic | -0.219 | rs788753815   | 2 |
| AG.CT       | 8 | 27425782 | 27425792 | 5.5     | .                  | .          | intergenic | .      | 106438 rs7921 | 2 |
| AAAT.ATTT   | 8 | 27497564 | 27497577 | 3.5     | .                  | .          | intergenic | -0.012 | 724855 rs7864 | 2 |
| AAC.GTT     | 8 | 27714066 | 27714083 | 6       | .                  | .          | intergenic | .      | rs786228671   | 2 |
| AC.GT       | 8 | 27897672 | 27897684 | 6.5     | .                  | .          | intergenic | .      | 389677 rs7921 | 2 |
| AAAT.ATTT   | 8 | 28030790 | 28030811 | 5.5     | .                  | .          | intergenic | .      | rs791065062   | 2 |
| AC.GT       | 8 | 28032165 | 28032174 | 5       | .                  | .          | intergenic | .      | rs790670413   | 4 |
| AT.AT       | 8 | 28074785 | 28074800 | 8       | .                  | .          | intergenic | .      | rs789546675   | 2 |
| AAC.GTT     | 8 | 28104872 | 28104895 | 8       | .                  | .          | intergenic | .      | 368925 rs7903 | 2 |
| AC.GT       | 8 | 28189373 | 28189387 | 7.5     | .                  | .          | intergenic | 0.045  | 371928 rs7903 | 2 |
| AT.AT       | 8 | 28220015 | 28220026 | 6       | .                  | .          | intergenic | .      | rs790355837   | 2 |
| AAAC.GTTT   | 8 | 28287514 | 28287531 | 4.5     | .                  | .          | intergenic | 0.176  | rs792119380   | 2 |
| AC.GT       | 8 | 28670727 | 28670741 | 7.5     | .                  | .          | intergenic | -0.098 | .             | 2 |
| AT.AT       | 8 | 28735653 | 28735662 | 5       | .                  | .          | intergenic | .      | 317601 rs7886 | 2 |
| AAAAC.GTTTT | 8 | 28815887 | 28815910 | 4.8     | .                  | .          | intergenic | -0.006 | rs790311431   | 2 |
| AC.GT       | 8 | 28989998 | 28990009 | 6       | .                  | .          | intergenic | .      | rs787911091   | 2 |
| AG.CT       | 8 | 29262424 | 29262433 | 5       | ENSSSCT0000009593  | ARAP2      | intron     | -0.026 | rs790734834   | 2 |
| AATG.CATT   | 8 | 29458152 | 29458169 | 4.5     | .                  | .          | intergenic | 0.05   | .             | 2 |
| AC.GT       | 8 | 29670551 | 29670565 | 7.5     | ENSSSCT0000009594  | 1242-305H1 | promoter   | -0.058 | 314255 rs7930 | 2 |
| AC.GT       | 8 | 29670551 | 29670565 | 7.5     | ENSSSCT00000035368 | 1242-305H1 | promoter   | -0.058 | 314255 rs7930 | 2 |
| AC.GT       | 8 | 29670551 | 29670565 | 7.5     | ENSSSCT00000034516 | 1242-305H1 | promoter   | -0.058 | 314255 rs7930 | 2 |
| AC.GT       | 8 | 29670551 | 29670565 | 7.5     | ENSSSCT00000034680 | 1242-305H1 | promoter   | -0.058 | 314255 rs7930 | 2 |
| AAAC.GTTT   | 8 | 29859855 | 29859875 | 5.25    | .                  | .          | intergenic | 0.077  | 105527 rs7896 | 2 |
| AAG.CTT     | 8 | 29904521 | 29904534 | 4.66667 | .                  | .          | intergenic | 0.133  | rs792788226   | 2 |
| AC.GT       | 8 | 30137629 | 30137642 | 7       | .                  | .          | intergenic | 0.213  | rs787466548   | 3 |
| AG.CT       | 8 | 30404161 | 30404171 | 5.5     | ENSSSCT0000009595  | KIAA1239   | intron     | 3.067  | 391296 rs7906 | 2 |
| AAT.ATT     | 8 | 30425136 | 30425170 | 11.6667 | .                  | .          | intergenic | 1.816  | rs787320774   | 2 |
| AC.GT       | 8 | 30513717 | 30513730 | 7       | ENSSSCT0000009596  | C4orf19    | intron     | -0.036 | rs788478452   | 3 |
| AATG.CATT   | 8 | 30616182 | 30616193 | 3       | .                  | .          | intergenic | .      | .             | 2 |
| AAC.GTT     | 8 | 30621743 | 30621756 | 4.66667 | .                  | .          | intergenic | 0.165  | 228804 rs7912 | 2 |
| AT.AT       | 8 | 30645871 | 30645882 | 6       | .                  | .          | intergenic | 0.066  | rs787801308   | 2 |
| AC.GT       | 8 | 30690255 | 30690265 | 5.5     | .                  | .          | intergenic | 0.228  | rs791042953   | 2 |
| AG.CT       | 8 | 30719326 | 30719338 | 6.5     | ENSSSCT0000009598  | PGM2       | intron     | -0.232 | rs789935046   | 3 |
| AAC.GTT     | 8 | 30797202 | 30797219 | 6       | .                  | .          | intergenic | 0.214  | 384179 rs7907 | 2 |
| AC.GT       | 8 | 31048391 | 31048404 | 7       | ENSSSCT0000009599  | TBC1D1     | intron     | -0.01  | .             | 3 |
| AGAGG.CCTCT | 8 | 31099761 | 31099778 | 3       | .                  | .          | intergenic | -0.335 | rs787542011   | 2 |
| AG.CT       | 8 | 31348231 | 31348243 | 6.5     | .                  | .          | intergenic | 0.117  | 148382 rs7900 | 3 |
| AAGG.CCTT   | 8 | 31370576 | 31370610 | 8.75    | .                  | .          | intergenic | 0.499  | 363162 rs7879 | 2 |
| ACAT.ATGT   | 8 | 31426974 | 31427002 | 7.25    | .                  | .          | intergenic | 0.235  | 311836 rs7868 | 2 |
| AAG.CTT     | 8 | 31437919 | 31437938 | 6.66667 | .                  | .          | intergenic | 0.035  | rs791713743   | 2 |
| AC.GT       | 8 | 31477779 | 31477794 | 8       | .                  | .          | intergenic | -0.007 | rs788426590   | 4 |
| AAC.GTT     | 8 | 31477904 | 31477917 | 4.66667 | .                  | .          | intergenic | -0.125 | rs793507078   | 2 |
| AAC.GTT     | 8 | 31487971 | 31487984 | 4.66667 | .                  | .          | intergenic | 0.037  | rs692826570   | 4 |

|              |   |          |          |         |                    |          |            |        |                 |   |
|--------------|---|----------|----------|---------|--------------------|----------|------------|--------|-----------------|---|
| AGG.CCT      | 8 | 31554934 | 31554946 | 4.33333 | .                  | .        | intergenic | 0.102  | rs791090893     | 2 |
| AT.AT        | 8 | 31715709 | 31715734 | 13      | ENSSSCT00000009611 | FAM114A1 | intron     | .      | rs793154833     | 4 |
| AC.GT        | 8 | 31870106 | 31870118 | 6.5     | ENSSSCT00000009613 | .        | intron     | 0.174  | rs42117 rs7932  | 2 |
| AATAT.ATATT  | 8 | 31995419 | 31995443 | 5       | .                  | .        | intergenic | .      | rs793298239     | 2 |
| AC.GT        | 8 | 32082099 | 32082110 | 6       | ENSSSCT00000009615 | WDR19    | intron     | 0.189  | rs792250336     | 2 |
| AC.GT        | 8 | 32082099 | 32082110 | 6       | ENSSSCT00000027462 | WDR19    | intron     | 0.189  | rs792250336     | 2 |
| AC.GT        | 8 | 32212752 | 32212761 | 5       | ENSSSCT00000009614 | .        | intron     | 0.255  | .               | 2 |
| AAT.ATT      | 8 | 32320975 | 32320991 | 5.66667 | ENSSSCT00000022874 | LIAS     | intron     | 0.125  | rs36555 rs7908  | 2 |
| AAAC.GTTT    | 8 | 32526231 | 32526245 | 3.75    | .                  | .        | intergenic | .      | rs787952444     | 2 |
| AT.AT        | 8 | 32638552 | 32638569 | 9       | ENSSSCT00000030457 | UBE2K    | intron     | 0.15   | rs788084415     | 4 |
| AC.GT        | 8 | 32646037 | 32646051 | 7.5     | ENSSSCT00000030457 | UBE2K    | intron     | 0.159  | rs724990 rs7891 | 2 |
| AAAC.GTTT    | 8 | 33002359 | 33002379 | 5.25    | ENSSSCT00000009621 | RHOH     | intron     | .      | rs291455 rs7862 | 2 |
| AC.GT        | 8 | 33046700 | 33046717 | 9       | .                  | .        | intergenic | 0.113  | rs176750 rs7894 | 3 |
| AG.CT        | 8 | 33101632 | 33101641 | 5       | .                  | .        | intergenic | -0.12  | rs786651508     | 3 |
| AGG.CCT      | 8 | 33129610 | 33129629 | 6.66667 | .                  | .        | intergenic | 0.05   | rs787275632     | 2 |
| AC.GT        | 8 | 33165232 | 33165270 | 19.5    | .                  | .        | intergenic | -0.005 | rs791542617     | 4 |
| AAAC.GTTT    | 8 | 33209987 | 33210016 | 7.5     | .                  | .        | intergenic | .      | .               | 2 |
| AC.GT        | 8 | 33247471 | 33247482 | 6       | ENSSSCT00000029046 | APBB2    | intron     | .      | .               | 4 |
| AG.CT        | 8 | 33291939 | 33291951 | 6.5     | ENSSSCT00000029046 | APBB2    | intron     | 0.128  | rs151716 rs7907 | 2 |
| AG.CT        | 8 | 33291939 | 33291951 | 6.5     | ENSSSCT00000021654 | SNORD113 | promoter   | 0.128  | rs151716 rs7907 | 2 |
| AT.AT        | 8 | 33454763 | 33454782 | 10      | ENSSSCT00000027797 | NSUN7    | intron     | .      | rs790423517     | 2 |
| AT.AT        | 8 | 33717305 | 33717314 | 5       | .                  | .        | intergenic | -0.176 | .               | 2 |
| AAAC.GTTT    | 8 | 33743781 | 33743808 | 7       | .                  | .        | intergenic | -0.106 | rs790306378     | 2 |
| AAAC.GTTT    | 8 | 33824272 | 33824291 | 5       | .                  | .        | intergenic | 0.086  | rs792663288     | 2 |
| AAAAG.CTTTT  | 8 | 33966283 | 33966303 | 4.2     | .                  | .        | intergenic | 0.085  | .               | 2 |
| AG.CT        | 8 | 33967611 | 33967622 | 6       | .                  | .        | intergenic | 0.118  | rs790574690     | 2 |
| AT.AT        | 8 | 34043070 | 34043094 | 12.5    | .                  | .        | intergenic | 0.2    | rs788111804     | 3 |
| AAG.CTT      | 8 | 34136062 | 34136075 | 4.66667 | ENSSSCT00000009626 | .        | intron     | -0.092 | rs791656724     | 2 |
| AC.GT        | 8 | 34166939 | 34166951 | 6.5     | ENSSSCT00000009626 | .        | intron     | 0.105  | rs728622 rs7877 | 2 |
| ACAT.ATGT    | 8 | 34198554 | 34198575 | 5.5     | ENSSSCT00000009626 | .        | intron     | -0.156 | rs788626397     | 2 |
| AG.CT        | 8 | 34262260 | 34262273 | 7       | ENSSSCT00000009626 | .        | intron     | 0.017  | rs791132607     | 2 |
| AAC.GTT      | 8 | 34263337 | 34263351 | 5       | ENSSSCT00000009626 | .        | intron     | -0.141 | rs269980 rs7875 | 2 |
| AAAC.GTTT    | 8 | 34352923 | 34352946 | 6       | ENSSSCT00000009626 | .        | intron     | -0.065 | rs366624 rs7928 | 2 |
| AT.AT        | 8 | 34647687 | 34647696 | 5       | .                  | .        | intergenic | .      | rs792295059     | 2 |
| AAAC.GTTT    | 8 | 34731390 | 34731416 | 6.75    | ENSSSCT00000009628 | SLC30A9  | intron     | .      | rs787596028     | 2 |
| AG.CT        | 8 | 34908915 | 34908924 | 5       | .                  | .        | intergenic | 0.067  | rs392400 rs7935 | 4 |
| AAAAC.GTTTT  | 8 | 34966860 | 34966881 | 4.4     | .                  | .        | intergenic | 0.214  | rs792201830     | 2 |
| AC.GT        | 8 | 35394263 | 35394275 | 6.5     | .                  | .        | intergenic | -0.107 | rs774794 rs7909 | 2 |
| AAAAC.GTTTT  | 8 | 35533861 | 35533876 | 3.2     | .                  | .        | intergenic | 0.451  | rs695568172     | 2 |
| AAGG.CCTT    | 8 | 35778458 | 35778482 | 6.25    | .                  | .        | intergenic | 0.077  | rs786693670     | 2 |
| AAAAT.ATTTT  | 8 | 36297265 | 36297294 | 6       | .                  | .        | intergenic | -0.191 | rs786491275     | 2 |
| AT.AT        | 8 | 36833344 | 36833370 | 13.5    | .                  | .        | intergenic | 0.004  | rs788479877     | 2 |
| AT.AT        | 8 | 36993685 | 36993700 | 8       | .                  | .        | intergenic | .      | .               | 2 |
| AG.CT        | 8 | 37010054 | 37010066 | 6.5     | .                  | .        | intergenic | .      | rs792293909     | 2 |
| AAAC.GTTT    | 8 | 37187549 | 37187560 | 3       | .                  | .        | intergenic | .      | rs786590782     | 2 |
| AC.GT        | 8 | 37318846 | 37318857 | 6       | .                  | .        | intergenic | -0.363 | .               | 3 |
| AC.GT        | 8 | 37358312 | 37358324 | 6.5     | .                  | .        | intergenic | 0.095  | rs787948698     | 2 |
| AG.CT        | 8 | 37405184 | 37405194 | 5.5     | .                  | .        | intergenic | 0.034  | rs792420495     | 2 |
| AT.AT        | 8 | 37422209 | 37422220 | 6       | .                  | .        | intergenic | 0.356  | rs786874686     | 2 |
| AAAAC.GTTTT  | 8 | 37569781 | 37569800 | 4       | .                  | .        | intergenic | .      | rs786645821     | 3 |
| AAAC.GTTT    | 8 | 37727424 | 37727450 | 6.75    | .                  | .        | intergenic | -0.074 | rs373158 rs7862 | 3 |
| AG.CT        | 8 | 37757196 | 37757205 | 5       | .                  | .        | intergenic | -0.066 | rs792407059     | 4 |
| AAAAT.ATTTT  | 8 | 37844429 | 37844452 | 4.8     | .                  | .        | intergenic | -0.131 | rs345338 rs7897 | 2 |
| AC.GT        | 8 | 37874496 | 37874518 | 11.5    | .                  | .        | intergenic | -0.097 | rs788459224     | 5 |
| AT.AT        | 8 | 37875857 | 37875868 | 6       | .                  | .        | intergenic | 0.13   | .               | 2 |
| AT.AT        | 8 | 37999636 | 37999647 | 6       | .                  | .        | intergenic | -0.262 | rs788905739     | 2 |
| AC.GT        | 8 | 38003387 | 38003405 | 9.5     | .                  | .        | intergenic | 0.078  | rs791120518     | 2 |
| AAC.GTT      | 8 | 38025001 | 38025020 | 6.66667 | ENSSSCT00000009639 | GABRG1   | intron     | 0.053  | rs790037569     | 2 |
| AG.CT        | 8 | 38259958 | 38259969 | 6       | ENSSSCT00000023000 | GABRA2   | intron     | -0.161 | .               | 2 |
| AT.AT        | 8 | 38274854 | 38274877 | 12      | ENSSSCT00000023000 | GABRA2   | intron     | 0.062  | .               | 2 |
| ATC.GAT      | 8 | 38313655 | 38313673 | 6.33333 | ENSSSCT00000023000 | GABRA2   | intron     | 0.058  | .               | 2 |
| AATC.GATT    | 8 | 38325328 | 38325358 | 7.75    | ENSSSCT00000023000 | GABRA2   | intron     | -0.017 | rs140557 rs7927 | 2 |
| AAAAC.GTTTT  | 8 | 38432853 | 38432882 | 5       | .                  | .        | intergenic | .      | rs787864 rs7924 | 2 |
| AT.AT        | 8 | 38440884 | 38440894 | 5.5     | .                  | .        | intergenic | 0.415  | rs790913325     | 4 |
| AT.AT        | 8 | 38545155 | 38545171 | 8.5     | .                  | .        | intergenic | -0.135 | rs786790150     | 2 |
| AC.GT        | 8 | 38635356 | 38635383 | 14      | .                  | .        | intergenic | 0.098  | rs786450046     | 2 |
| AAAC.GTTT    | 8 | 38659226 | 38659245 | 5       | .                  | .        | intergenic | .      | rs247513 rs7901 | 2 |
| AT.AT        | 8 | 38801343 | 38801357 | 7.5     | ENSSSCT00000031430 | GABRA4   | intron     | 0.179  | rs381030 rs7927 | 2 |
| AC.GT        | 8 | 38941150 | 38941160 | 5.5     | .                  | .        | intergenic | 0.055  | rs16983 rs7867  | 2 |
| AAAG.CTTT    | 8 | 38953467 | 38953483 | 4.25    | .                  | .        | intergenic | 0.226  | rs793401290     | 2 |
| AAAG.CTTT    | 8 | 39007346 | 39007360 | 3.75    | .                  | .        | intergenic | .      | rs788869750     | 2 |
| AAC.GTT      | 8 | 39213325 | 39213342 | 6       | .                  | .        | intergenic | 0.092  | rs392486 rs7919 | 4 |
| AAAT.ATTT    | 8 | 39331878 | 39331895 | 4.5     | .                  | .        | intergenic | 0.123  | rs787926822     | 4 |
| AT.AT        | 8 | 39522402 | 39522413 | 6       | ENSSSCT00000009643 | CORIN    | intron     | .      | rs378038 rs7929 | 2 |
| AAG.CTT      | 8 | 39566798 | 39566817 | 6.66667 | ENSSSCT00000009643 | CORIN    | intron     | .      | rs368262 rs7928 | 2 |
| AC.GT        | 8 | 39571500 | 39571538 | 19.5    | ENSSSCT00000009643 | CORIN    | intron     | 0.564  | rs107595 rs7912 | 3 |
| AAAC.GTTT    | 8 | 39650077 | 39650091 | 3.75    | ENSSSCT00000009643 | CORIN    | intron     | .      | .               | 2 |
| AG.CT        | 8 | 39667037 | 39667047 | 5.5     | ENSSSCT00000009643 | CORIN    | intron     | 0.215  | rs793042598     | 2 |
| AAAAAT.ATTTT | 8 | 39711032 | 39711050 | 3.16667 | ENSSSCT00000009643 | CORIN    | intron     | .      | rs788764519     | 2 |
| AC.GT        | 8 | 40004049 | 40004063 | 7.5     | ENSSSCT00000009647 | .        | 5'utr      | .      | rs787891231     | 2 |
| AAAC.GTTT    | 8 | 40113837 | 40113851 | 3.75    | ENSSSCT00000009650 | TEC      | intron     | .      | rs787738707     | 2 |
| AAAC.GTTT    | 8 | 40113837 | 40113851 | 3.75    | ENSSSCT00000034638 | TEC      | intron     | .      | rs787738707     | 2 |
| AAAC.GTTT    | 8 | 40113837 | 40113851 | 3.75    | ENSSSCT00000032911 | TEC      | intron     | .      | rs787738707     | 2 |
| AC.GT        | 8 | 40299614 | 40299630 | 8.5     | ENSSSCT00000009651 | SLAIN2   | intron     | 0.169  | rs313417 rs7898 | 4 |

|              |   |          |          |         |                     |         |            |        |                 |   |
|--------------|---|----------|----------|---------|---------------------|---------|------------|--------|-----------------|---|
| AAAG.CTTT    | 8 | 40304801 | 40304821 | 5.25    | ENSSSCT00000009651  | SLAIN2  | intron     | 0.22   | rs789645700     | 2 |
| AAAG.CTTT    | 8 | 40377412 | 40377434 | 5.75    | .                   | .       | intergenic | 0.284  | rs792034078     | 2 |
| AATT.AATT    | 8 | 40664143 | 40664166 | 6       | ENSSSCT00000009661  | .       | intron     | 0.073  | rs53409 rs7862  | 2 |
| AATT.AATT    | 8 | 40664143 | 40664166 | 6       | ENSSSCT000000031947 | .       | intron     | 0.073  | rs53409 rs7862  | 2 |
| AATT.AATT    | 8 | 40664143 | 40664166 | 6       | ENSSSCT00000009658  | .       | intron     | 0.073  | rs53409 rs7862  | 2 |
| AAAAT.ATTTT  | 8 | 40817679 | 40817698 | 4       | .                   | .       | intergenic | .      | rs793779590     | 2 |
| AC.GT        | 8 | 41078009 | 41078021 | 6.5     | ENSSSCT00000009664  | CWH43   | intron     | 0.293  | .               | 3 |
| ACCT.AGGT    | 8 | 41142287 | 41142317 | 7.75    | .                   | .       | intergenic | .      | rs793454760     | 2 |
| AAT.ATT      | 8 | 41209492 | 41209505 | 4.66667 | ENSSSCT00000009666  | DCUN1D4 | intron     | 0.035  | rs786252079     | 3 |
| AAAC.GTTT    | 8 | 41313461 | 41313477 | 4.25    | ENSSSCT00000009669  | SGCB    | intron     | .      | rs792319300     | 2 |
| AG.CT        | 8 | 41478949 | 41478965 | 8.5     | .                   | .       | intergenic | -0.086 | .               | 2 |
| AC.GT        | 8 | 41479686 | 41479707 | 11      | .                   | .       | intergenic | 0.31   | rs788884059     | 3 |
| AAAC.GTTT    | 8 | 41507953 | 41507979 | 6.75    | .                   | .       | intergenic | .      | rs722525 rs7913 | 2 |
| AAAAC.GTTTT  | 8 | 41571645 | 41571672 | 5.6     | .                   | .       | intergenic | .      | rs786425298     | 2 |
| AC.GT        | 8 | 41711513 | 41711526 | 7       | .                   | .       | intergenic | 0.119  | .               | 4 |
| AAAC.GTTT    | 8 | 41779688 | 41779703 | 4       | .                   | .       | intergenic | .      | rs787332826     | 2 |
| AGAT.ATCT    | 8 | 41997816 | 41997830 | 3.75    | .                   | .       | intergenic | 0.397  | rs786238981     | 2 |
| AAAC.GTTT    | 8 | 42005708 | 42005726 | 4.75    | .                   | .       | intergenic | 0.151  | rs791676588     | 2 |
| AG.CT        | 8 | 42254432 | 42254442 | 5.5     | ENSSSCT00000009672  | .       | intron     | .      | rs787270967     | 3 |
| AG.CT        | 8 | 42283657 | 42283673 | 8.5     | .                   | .       | intergenic | 0.513  | rs790591198     | 2 |
| AC.GT        | 8 | 42347517 | 42347527 | 5.5     | .                   | .       | intergenic | 0.141  | .               | 3 |
| AAAAAG.CTTTT | 8 | 42567825 | 42567849 | 4.16667 | .                   | .       | intergenic | .      | rs791931395     | 2 |
| AC.GT        | 8 | 42606499 | 42606508 | 5       | .                   | .       | intergenic | .      | rs788590117     | 2 |
| AAC.GTT      | 8 | 42758195 | 42758211 | 5.66667 | .                   | .       | intergenic | 0.112  | rs786339186     | 3 |
| AT.AT        | 8 | 42797523 | 42797546 | 12      | .                   | .       | intergenic | .      | rs791913163     | 2 |
| AAAT.ATTT    | 8 | 42821463 | 42821477 | 3.75    | .                   | .       | intergenic | 0.38   | .               | 2 |
| AC.GT        | 8 | 42936250 | 42936263 | 7       | .                   | .       | intergenic | 0.215  | rs789387043     | 2 |
| AGC.GCT      | 8 | 43184403 | 43184419 | 5.66667 | .                   | .       | intergenic | 0.004  | rs325193 rs7911 | 2 |
| AGAT.ATCT    | 8 | 43359612 | 43359627 | 4       | .                   | .       | intergenic | 0.124  | rs786297559     | 2 |
| AC.GT        | 8 | 43456336 | 43456350 | 7.5     | .                   | .       | intergenic | 0.157  | .               | 4 |
| AC.GT        | 8 | 43571669 | 43571683 | 7.5     | ENSSSCT00000009679  | KIT     | intron     | 0.311  | rs291962 rs7925 | 2 |
| ATC.GAT      | 8 | 43600998 | 43601015 | 6       | ENSSSCT00000009679  | KIT     | 3'utr      | 0.284  | rs788115809     | 2 |
| ACAT.ATGT    | 8 | 43751297 | 43751319 | 5.75    | .                   | .       | intergenic | -0.037 | rs790076446     | 2 |
| AAAT.ATTT    | 8 | 43756893 | 43756913 | 5.25    | .                   | .       | intergenic | -0.071 | rs361952 rs7870 | 2 |
| AG.CT        | 8 | 43861747 | 43861776 | 15      | .                   | .       | intergenic | -0.077 | .               | 2 |
| AC.GT        | 8 | 44173301 | 44173315 | 7.5     | .                   | .       | intergenic | .      | rs106291 rs7885 | 2 |
| ACAG.CTGT    | 8 | 44415305 | 44415319 | 3.75    | .                   | .       | intergenic | .      | rs193438 rs7897 | 2 |
| AT.AT        | 8 | 44583718 | 44583728 | 5.5     | .                   | .       | intergenic | .      | rs786674947     | 2 |
| AAAG.CTTT    | 8 | 44711347 | 44711365 | 4.75    | .                   | .       | intergenic | .      | rs787124809     | 2 |
| AC.GT        | 8 | 44790654 | 44790673 | 10      | .                   | .       | intergenic | .      | rs791837194     | 2 |
| AG.CT        | 8 | 44810410 | 44810420 | 5.5     | .                   | .       | intergenic | .      | .               | 2 |
| AC.GT        | 8 | 45195809 | 45195823 | 7.5     | .                   | .       | intergenic | .      | rs300950 rs7921 | 4 |
| AAAAAT.ATTTT | 8 | 45233188 | 45233206 | 3.16667 | .                   | .       | intergenic | -0.003 | .               | 2 |
| AAAC.GTTT    | 8 | 45245155 | 45245171 | 4.25    | .                   | .       | intergenic | -0.062 | rs347394 rs7898 | 2 |
| AT.AT        | 8 | 45323120 | 45323147 | 14      | .                   | .       | intergenic | 0.094  | rs793874905     | 2 |
| AAAAC.GTTTT  | 8 | 45879863 | 45879892 | 6       | .                   | .       | intergenic | .      | rs791407686     | 2 |
| AAAAG.CTTTT  | 8 | 45879966 | 45879984 | 3.8     | .                   | .       | intergenic | .      | rs789636985     | 2 |
| AAAG.CTTT    | 8 | 46033898 | 46033925 | 7       | .                   | .       | intergenic | .      | rs395770 rs7923 | 2 |
| AAG.CTT      | 8 | 46185199 | 46185218 | 6.66667 | .                   | .       | intergenic | .      | .               | 4 |
| AT.AT        | 8 | 46326414 | 46326423 | 5       | .                   | .       | intergenic | -0.274 | .               | 3 |
| AAT.ATT      | 8 | 46679337 | 46679355 | 6.33333 | .                   | .       | intergenic | .      | rs792287461     | 3 |
| AT.AT        | 8 | 46698160 | 46698172 | 6.5     | .                   | .       | intergenic | .      | rs378636 rs7888 | 2 |
| AT.AT        | 8 | 46714320 | 46714344 | 12.5    | ENSSSCT00000009708  | TDO2    | intron     | -0.068 | .               | 2 |
| AT.AT        | 8 | 47108919 | 47108930 | 6       | .                   | .       | intergenic | .      | rs168555 rs7891 | 2 |
| AG.CT        | 8 | 47607888 | 47607912 | 12.5    | .                   | .       | intergenic | -0.308 | rs791882825     | 2 |
| AAAC.GTTT    | 8 | 47696141 | 47696168 | 7       | ENSSSCT00000024403  | PDGFC   | intron     | 0.032  | rs788914386     | 2 |
| AG.CT        | 8 | 47747886 | 47747922 | 18.5    | ENSSSCT00000024403  | PDGFC   | intron     | 0.044  | rs793636139     | 2 |
| ACAG.CTGT    | 8 | 47990166 | 47990184 | 4.75    | .                   | .       | intergenic | -0.052 | rs786950441     | 2 |
| AG.CT        | 8 | 48036276 | 48036285 | 5       | .                   | .       | intergenic | 0.064  | rs392168 rs7914 | 2 |
| AC.GT        | 8 | 48269967 | 48269976 | 5       | ENSSSCT00000022356  | GRIA2   | intron     | .      | .               | 4 |
| AAC.GTT      | 8 | 48283207 | 48283223 | 5.66667 | .                   | .       | intergenic | 0.064  | rs179032 rs7931 | 2 |
| AT.AT        | 8 | 48324057 | 48324067 | 5.5     | .                   | .       | intergenic | .      | rs118410 rs7921 | 4 |
| AG.CT        | 8 | 48410232 | 48410248 | 8.5     | .                   | .       | intergenic | .      | rs383417 rs7912 | 2 |
| AC.GT        | 8 | 48793442 | 48793461 | 10      | .                   | .       | intergenic | 0.138  | rs791550964     | 3 |
| AC.GT        | 8 | 48802149 | 48802159 | 5.5     | .                   | .       | intergenic | -0.149 | rs786395102     | 2 |
| AAC.GTT      | 8 | 48978726 | 48978741 | 5.33333 | .                   | .       | intergenic | -0.186 | rs786282356     | 3 |
| AAAC.GTTT    | 8 | 49038798 | 49038813 | 4       | .                   | .       | intergenic | .      | rs786835263     | 2 |
| AAAC.GTTT    | 8 | 49199019 | 49199043 | 6.25    | .                   | .       | intergenic | 0.211  | rs790737468     | 2 |
| AAAG.CTTT    | 8 | 49201555 | 49201567 | 3.25    | .                   | .       | intergenic | 0.191  | rs790049598     | 2 |
| AAAC.GTTT    | 8 | 49289902 | 49289925 | 6       | ENSSSCT00000009714  | FAM198B | intron     | .      | rs791258912     | 2 |
| AAAC.GTTT    | 8 | 49296999 | 49297037 | 9.75    | ENSSSCT00000009714  | FAM198B | intron     | 0.07   | rs793214506     | 2 |
| AC.GT        | 8 | 49368631 | 49368647 | 8.5     | ENSSSCT00000009715  | TMEM144 | intron     | .      | rs719365 rs7870 | 2 |
| AAAC.GTTT    | 8 | 49405200 | 49405225 | 6.5     | ENSSSCT00000009715  | TMEM144 | intron     | 0.268  | rs180486 rs7874 | 2 |
| AC.GT        | 8 | 49491226 | 49491240 | 7.5     | .                   | .       | intergenic | -0.08  | rs317473 rs7932 | 5 |
| AG.CT        | 8 | 49940941 | 49940952 | 6       | ENSSSCT00000009716  | RXFP1   | intron     | -0.008 | .               | 2 |
| AATG.CATT    | 8 | 49942920 | 49942949 | 7.5     | ENSSSCT00000009716  | RXFP1   | intron     | 0.159  | rs384637 rs7910 | 2 |
| AAAC.GTTT    | 8 | 50415079 | 50415103 | 6.25    | ENSSSCT00000009724  | RAPGEF2 | intron     | 0.211  | .               | 2 |
| AAC.GTT      | 8 | 50433122 | 50433147 | 8.66667 | ENSSSCT00000009724  | RAPGEF2 | intron     | 0.244  | rs789906347     | 2 |
| AC.GT        | 8 | 50441924 | 50441933 | 5       | ENSSSCT00000009724  | RAPGEF2 | intron     | -0.021 | rs791499977     | 2 |
| AAG.CTT      | 8 | 50448077 | 50448094 | 6       | ENSSSCT00000009724  | RAPGEF2 | intron     | 0.109  | rs787601230     | 2 |
| AT.AT        | 8 | 50497456 | 50497466 | 5.5     | ENSSSCT00000009724  | RAPGEF2 | intron     | -0.145 | .               | 2 |
| AG.CT        | 8 | 50602985 | 50602999 | 7.5     | ENSSSCT00000009724  | RAPGEF2 | intron     | 0.052  | rs328640 rs7884 | 2 |
| AAAC.GTTT    | 8 | 50776954 | 50776968 | 3.75    | .                   | .       | intergenic | 0.108  | rs791148525     | 2 |
| AAG.CTT      | 8 | 50846585 | 50846604 | 6.66667 | .                   | .       | intergenic | -0.035 | rs692361014     | 2 |

|              |   |          |          |         |                    |         |            |        |               |        |   |
|--------------|---|----------|----------|---------|--------------------|---------|------------|--------|---------------|--------|---|
| AAAG.CTTT    | 8 | 51045015 | 51045033 | 4.75    | .                  | .       | intergenic | .      | 316166        | rs7934 | 3 |
| AT.AT        | 8 | 51476416 | 51476426 | 5.5     | .                  | .       | intergenic | -0.255 | .             | .      | 2 |
| AT.AT        | 8 | 51582470 | 51582479 | 5       | .                  | .       | intergenic | .      | rs786400394   | .      | 2 |
| AT.AT        | 8 | 51754664 | 51754674 | 5.5     | .                  | .       | intergenic | .      | rs789838316   | .      | 2 |
| AC.GT        | 8 | 52270189 | 52270199 | 5.5     | .                  | .       | intergenic | .      | .             | .      | 3 |
| ACAT.ATGT    | 8 | 52663055 | 52663091 | 9.25    | .                  | .       | intergenic | -0.196 | rs787339990   | .      | 2 |
| AAAAAT.ATTTT | 8 | 52911237 | 52911259 | 3.83333 | .                  | .       | intergenic | .      | rs791299875   | .      | 2 |
| AG.CT        | 8 | 53036524 | 53036535 | 6       | .                  | .       | intergenic | -0.007 | rs791123957   | .      | 2 |
| AAAC.GTTT    | 8 | 53471457 | 53471488 | 8       | .                  | .       | intergenic | -0.16  | rs765810      | rs7900 | 2 |
| AAAC.GTTT    | 8 | 53592692 | 53592711 | 5       | .                  | .       | intergenic | -0.059 | rs788981500   | .      | 2 |
| AAAT.ATTT    | 8 | 53854051 | 53854069 | 4.75    | ENSSSCT00000031578 | .       | intron     | -0.008 | rs789656641   | .      | 2 |
| AT.AT        | 8 | 53905830 | 53905843 | 7       | ENSSSCT00000031578 | .       | intron     | -0.067 | rs772649      | rs7929 | 3 |
| AT.AT        | 8 | 54107095 | 54107118 | 12      | .                  | .       | intergenic | -0.021 | .             | .      | 2 |
| AT.AT        | 8 | 54196180 | 54196189 | 5       | .                  | .       | intergenic | .      | rs793236790   | .      | 2 |
| AT.AT        | 8 | 54239430 | 54239450 | 10.5    | .                  | .       | intergenic | .      | .             | .      | 3 |
| AT.AT        | 8 | 54253165 | 54253174 | 5       | .                  | .       | intergenic | .      | rs793389893   | .      | 2 |
| AT.AT        | 8 | 54445307 | 54445320 | 7       | .                  | .       | intergenic | .      | rs7913267     | rs7878 | 2 |
| AAG.CTT      | 8 | 54494987 | 54495001 | 5       | .                  | .       | intergenic | .      | rs712339377   | .      | 3 |
| AG.CT        | 8 | 54751514 | 54751530 | 8.5     | .                  | .       | intergenic | -0.017 | .             | .      | 3 |
| AAAC.GTTT    | 8 | 55129746 | 55129772 | 6.75    | ENSSSCT00000009730 | NAF1    | intron     | .      | rs797464      | rs7887 | 2 |
| AC.GT        | 8 | 55443037 | 55443049 | 6.5     | .                  | .       | intergenic | 0.331  | rs791863805   | .      | 3 |
| AAAG.CTTT    | 8 | 55487644 | 55487662 | 4.75    | ENSSSCT00000009733 | TMA16   | intron     | 0.057  | rs794924      | rs7863 | 2 |
| AAT.ATT      | 8 | 55707762 | 55707784 | 7.66667 | .                  | .       | intergenic | .      | rs749853      | rs7888 | 2 |
| AC.GT        | 8 | 55806884 | 55806894 | 5.5     | .                  | .       | intergenic | -0.025 | rs789365908   | .      | 2 |
| AAT.ATT      | 8 | 55938873 | 55938884 | 4       | .                  | .       | intergenic | .      | rs790993968   | .      | 2 |
| AAAC.GTTT    | 8 | 57478310 | 57478324 | 3.75    | .                  | .       | intergenic | .      | rs791713968   | .      | 2 |
| AAAAT.ATTTT  | 8 | 58250231 | 58250248 | 3.6     | ENSSSCT00000031478 | CEP135  | intron     | 0.213  | .             | .      | 2 |
| AAAC.GTTT    | 8 | 58364598 | 58364618 | 5.25    | ENSSSCT00000024124 | EXOC1   | intron     | .      | rs789916947   | .      | 2 |
| AAAC.GTTT    | 8 | 58364598 | 58364618 | 5.25    | ENSSSCT00000031053 | EXOC1   | intron     | .      | rs789916947   | .      | 2 |
| AG.CT        | 8 | 58384838 | 58384848 | 5.5     | .                  | .       | intergenic | .      | .             | .      | 3 |
| AAAAC.GTTTT  | 8 | 59417862 | 59417882 | 4.2     | .                  | .       | intergenic | .      | rs795923      | rs7895 | 2 |
| AAAT.ATTT    | 8 | 59554623 | 59554643 | 5.25    | .                  | .       | intergenic | -0.146 | rs790788215   | .      | 2 |
| AAT.ATT      | 8 | 59557202 | 59557218 | 5.66667 | .                  | .       | intergenic | 0.046  | rs790304180   | .      | 2 |
| AGG.CCT      | 8 | 59827401 | 59827417 | 5.66667 | .                  | .       | intergenic | .      | rs793360760   | .      | 2 |
| AG.CT        | 8 | 60008113 | 60008123 | 5.5     | .                  | .       | intergenic | -0.155 | rs788836008   | .      | 2 |
| AAAAC.GTTTT  | 8 | 60040514 | 60040545 | 6.4     | .                  | .       | intergenic | -0.062 | rs791506      | rs7893 | 2 |
| AC.GT        | 8 | 60041947 | 60041957 | 5.5     | .                  | .       | intergenic | .      | rs790964506   | .      | 2 |
| AG.CT        | 8 | 60280893 | 60280903 | 5.5     | .                  | .       | intergenic | 0.061  | rs786739170   | .      | 2 |
| AT.AT        | 8 | 60447576 | 60447586 | 5.5     | .                  | .       | intergenic | 0.046  | rs786908465   | .      | 2 |
| AC.GT        | 8 | 61028293 | 61028314 | 11      | .                  | .       | intergenic | -0.024 | rs792438350   | .      | 2 |
| AATAT.ATATT  | 8 | 61036649 | 61036668 | 4       | .                  | .       | intergenic | -0.073 | rs7933785     | rs7910 | 2 |
| AC.GT        | 8 | 61078556 | 61078567 | 6       | .                  | .       | intergenic | .      | .             | .      | 2 |
| AG.CT        | 8 | 61154656 | 61154678 | 11.5    | .                  | .       | intergenic | -0.03  | rs79176603    | rs7915 | 2 |
| AC.GT        | 8 | 61180483 | 61180504 | 11      | .                  | .       | intergenic | -0.053 | rs79331109    | rs7887 | 3 |
| AC.GT        | 8 | 61224449 | 61224459 | 5.5     | .                  | .       | intergenic | 0.076  | .             | .      | 2 |
| AAAAG.CTTTT  | 8 | 61267183 | 61267217 | 7       | .                  | .       | intergenic | .      | rs79210466    | rs7865 | 2 |
| AC.GT        | 8 | 61804676 | 61804688 | 6.5     | .                  | .       | intergenic | -0.021 | rs789556391   | .      | 2 |
| AAG.CTT      | 8 | 62910737 | 62910752 | 5.33333 | .                  | .       | intergenic | .      | rs7949029     | rs7869 | 4 |
| AT.AT        | 8 | 62915264 | 62915278 | 7.5     | .                  | .       | intergenic | -0.062 | rs7925458     | rs7877 | 2 |
| AC.GT        | 8 | 63452870 | 63452882 | 6.5     | .                  | .       | intergenic | 0.023  | rs79693017382 | .      | 3 |
| AC.GT        | 8 | 63569659 | 63569675 | 8.5     | .                  | .       | intergenic | .      | rs791043259   | .      | 4 |
| AAAC.GTTT    | 8 | 63945963 | 63945993 | 7.75    | .                  | .       | intergenic | .      | rs789917065   | .      | 2 |
| AAT.ATT      | 8 | 64732492 | 64732505 | 4.66667 | .                  | .       | intergenic | .      | rs792571248   | .      | 2 |
| AT.AT        | 8 | 64790943 | 64790953 | 5.5     | .                  | .       | intergenic | .      | .             | .      | 2 |
| AT.AT        | 8 | 65113003 | 65113014 | 6       | .                  | .       | intergenic | -0.008 | rs792448791   | .      | 2 |
| AC.GT        | 8 | 65575336 | 65575345 | 5       | .                  | .       | intergenic | 0.042  | .             | .      | 4 |
| AC.GT        | 8 | 66068232 | 66068250 | 9.5     | .                  | .       | intergenic | .      | rs789776985   | .      | 2 |
| AAAAC.GTTTT  | 8 | 66128879 | 66128899 | 4.2     | .                  | .       | intergenic | .      | rs792031846   | .      | 2 |
| AAC.GTT      | 8 | 66689283 | 66689294 | 4       | .                  | .       | intergenic | 0.105  | rs7984391     | rs7885 | 3 |
| AT.AT        | 8 | 66695811 | 66695822 | 6       | .                  | .       | intergenic | -0.251 | rs793584436   | .      | 2 |
| AT.AT        | 8 | 66894734 | 66894744 | 5.5     | .                  | .       | intergenic | -0.08  | .             | .      | 2 |
| AAAT.ATTT    | 8 | 67082956 | 67082976 | 5.25    | .                  | .       | intergenic | 0.032  | rs793809298   | .      | 2 |
| AAAC.GTTT    | 8 | 67308353 | 67308366 | 3.5     | ENSSSCT00000009766 | EPHA5   | intron     | -0.058 | rs79303250    | rs7925 | 2 |
| AC.GT        | 8 | 67570966 | 67570979 | 7       | .                  | .       | intergenic | 0.009  | .             | .      | 4 |
| AAG.CTT      | 8 | 68164132 | 68164147 | 5.33333 | .                  | .       | intergenic | 0.352  | rs79356026    | rs7885 | 2 |
| AG.CT        | 8 | 68635294 | 68635314 | 10.5    | .                  | .       | intergenic | -0.2   | .             | .      | 3 |
| AC.GT        | 8 | 68691734 | 68691744 | 5.5     | .                  | .       | intergenic | .      | rs79229607    | rs7885 | 2 |
| AAAT.ATTT    | 8 | 68726332 | 68726346 | 3.75    | .                  | .       | intergenic | .      | rs79367193    | rs7897 | 2 |
| AT.AT        | 8 | 68729987 | 68729998 | 6       | .                  | .       | intergenic | .      | rs78787458737 | .      | 3 |
| AAAAG.CTTTT  | 8 | 68731269 | 68731286 | 3.6     | .                  | .       | intergenic | .      | rs78787254727 | .      | 2 |
| AT.AT        | 8 | 68751812 | 68751826 | 7.5     | .                  | .       | intergenic | -0.042 | rs79393659346 | .      | 2 |
| AT.AT        | 8 | 68797185 | 68797198 | 7       | .                  | .       | intergenic | 0.167  | rs79364349    | rs7898 | 2 |
| AAAC.GTTT    | 8 | 68878094 | 68878124 | 7.75    | .                  | .       | intergenic | 0.071  | rs79260381    | rs7890 | 2 |
| AAAC.GTTT    | 8 | 68879923 | 68879938 | 4       | .                  | .       | intergenic | 0.164  | rs789471982   | .      | 2 |
| AAGAG.CTCTT  | 8 | 68906245 | 68906270 | 5.2     | .                  | .       | intergenic | 0.054  | rs787470268   | .      | 2 |
| AAAC.GTTT    | 8 | 69050660 | 69050683 | 6       | .                  | .       | intergenic | 0.243  | rs79384085    | rs7938 | 2 |
| AT.AT        | 8 | 69110618 | 69110628 | 5.5     | .                  | .       | intergenic | 0.339  | rs791033739   | .      | 2 |
| AAAT.ATTT    | 8 | 69171697 | 69171715 | 4.75    | .                  | .       | intergenic | 0.041  | rs79358726    | rs7881 | 2 |
| AATAT.ATATT  | 8 | 69176466 | 69176480 | 3       | .                  | .       | intergenic | 0.125  | rs787802345   | .      | 2 |
| AAAT.ATTT    | 8 | 69570670 | 69570685 | 4       | .                  | .       | intergenic | .      | rs786259550   | .      | 2 |
| AAAC.GTTT    | 8 | 69608389 | 69608418 | 7.5     | .                  | .       | intergenic | -0.142 | rs79117922    | rs7897 | 3 |
| AAAC.GTTT    | 8 | 69826818 | 69826840 | 5.75    | ENSSSCT00000009772 | UBA6    | intron     | .      | .             | .      | 2 |
| AC.GT        | 8 | 70011717 | 70011728 | 6       | ENSSSCT00000009774 | MPRSS11 | intron     | 0.123  | rs79336963    | rs7907 | 2 |
| AC.GT        | 8 | 70042508 | 70042523 | 8       | .                  | .       | intergenic | 0.073  | .             | .      | 4 |

|             |   |          |          |         |                     |          |            |        |               |   |
|-------------|---|----------|----------|---------|---------------------|----------|------------|--------|---------------|---|
| AT.AT       | 8 | 70082277 | 70082287 | 5.5     | ENSSSCT00000009775  | MPRSS11, | intron     | -0.073 | rs793760924   | 2 |
| AATG.CATT   | 8 | 70217402 | 70217426 | 6.25    | ENSSSCT00000009778  | MPRSS11  | intron     | -0.106 | 570820 rs7916 | 3 |
| AAAC.GTTT   | 8 | 70333636 | 70333650 | 3.75    | .                   | .        | intergenic | .      | rs789811992   | 2 |
| AAAT.ATTT   | 8 | 71010004 | 71010030 | 6.75    | .                   | .        | intergenic | -0.202 | rs792021702   | 2 |
| AC.GT       | 8 | 71066821 | 71066834 | 7       | ENSSSCT00000022622  | SULT1B1  | intron     | -0.033 | .             | 4 |
| AAAC.GTTT   | 8 | 71435419 | 71435452 | 8.5     | ENSSSCT00000028087  | RUFY3    | intron     | 0.11   | 303582 rs7868 | 2 |
| AC.GT       | 8 | 71465489 | 71465507 | 9.5     | ENSSSCT00000028087  | RUFY3    | intron     | 0.209  | rs790160040   | 2 |
| AT.AT       | 8 | 71479301 | 71479312 | 6       | .                   | .        | intergenic | 0.472  | 370210 rs7879 | 2 |
| AAAC.GTTT   | 8 | 71626546 | 71626576 | 7.75    | ENSSSCT00000009795  | DCK      | intron     | .      | rs697598100   | 2 |
| AG.CT       | 8 | 71675210 | 71675226 | 8.5     | .                   | .        | intergenic | 0.005  | rs709910177   | 4 |
| ACC.GGT     | 8 | 71756942 | 71756960 | 6.33333 | .                   | .        | intergenic | 0.006  | .             | 2 |
| AGG.CCT     | 8 | 71932406 | 71932421 | 5.33333 | ENSSSCT00000009797  | SLC4A4   | intron     | -0.094 | 376467 rs7928 | 2 |
| AAC.GTT     | 8 | 72175901 | 72175912 | 4       | .                   | .        | intergenic | 0.303  | rs791723288   | 2 |
| AAAAC.GTTTT | 8 | 72198053 | 72198087 | 7       | .                   | .        | intergenic | -0.011 | 783658 rs7915 | 2 |
| AAAC.GTTT   | 8 | 72547496 | 72547516 | 5.25    | ENSSSCT00000009798  | NPFFR2   | intron     | -0.05  | rs792840995   | 2 |
| AAAC.GTTT   | 8 | 72615482 | 72615501 | 5       | .                   | .        | intergenic | 0.001  | rs790118981   | 2 |
| AG.CT       | 8 | 73349289 | 73349301 | 6.5     | ENSSSCT00000009801  | COX18    | intron     | .      | .             | 2 |
| AT.AT       | 8 | 73401800 | 73401810 | 5.5     | ENSSSCT00000028188  | ANKRD17  | intron     | 0.089  | 117081 rs7916 | 2 |
| AAAC.GTTT   | 8 | 73645333 | 73645350 | 4.5     | .                   | .        | intergenic | .      | rs789950904   | 2 |
| AT.AT       | 8 | 73665856 | 73665866 | 5.5     | .                   | .        | intergenic | 0.232  | rs786622707   | 2 |
| AAC.GTT     | 8 | 73856440 | 73856469 | 10      | ENSSSCT00000026155  | .        | intron     | .      | rs789418853   | 2 |
| AAAC.GTTT   | 8 | 74085318 | 74085332 | 3.75    | ENSSSCT00000034805  | IL8      | exon       | 0.196  | rs787169444   | 2 |
| AAAC.GTTT   | 8 | 74085318 | 74085332 | 3.75    | ENSSSCT00000009807  | IL8      | intron     | 0.196  | rs787169444   | 2 |
| AC.GT       | 8 | 74287530 | 74287549 | 10      | ENSSSCT00000009813  | CXCL2    | intron     | .      | rs788330415   | 2 |
| AC.GT       | 8 | 74345732 | 74345744 | 6.5     | ENSSSCT00000009815  | MTHFD2L  | intron     | 0.069  | 346913 rs7869 | 3 |
| AG.CT       | 8 | 74669315 | 74669325 | 5.5     | .                   | .        | intergenic | .      | .             | 4 |
| AATG.CATT   | 8 | 75003925 | 75003953 | 7.25    | .                   | .        | intergenic | 0.07   | rs787853987   | 2 |
| AATG.CATT   | 8 | 75067531 | 75067552 | 5.5     | .                   | .        | intergenic | -0.058 | rs787880101   | 2 |
| AT.AT       | 8 | 75117399 | 75117414 | 8       | .                   | .        | intergenic | 0.173  | rs790883650   | 2 |
| AC.GT       | 8 | 75176789 | 75176818 | 15      | .                   | .        | intergenic | 0.112  | 388673 rs7869 | 4 |
| AT.AT       | 8 | 75402189 | 75402206 | 9       | .                   | .        | intergenic | 0.141  | 341467 rs7931 | 2 |
| AAAT.ATTT   | 8 | 75633243 | 75633264 | 5.5     | .                   | .        | intergenic | .      | rs703889887   | 2 |
| AC.GT       | 8 | 75685581 | 75685595 | 7.5     | ENSSSCT00000009827  | PPEF2    | intron     | -0.141 | 273105 rs7937 | 3 |
| AAC.GTT     | 8 | 75807173 | 75807186 | 4.66667 | ENSSSCT00000023437  | CXCL9    | promoter   | 0.252  | 274640 rs7898 | 2 |
| AT.AT       | 8 | 75999719 | 75999730 | 6       | ENSSSCT00000009834  | .        | intron     | 0.277  | rs792507106   | 2 |
| AAG.CTT     | 8 | 76038457 | 76038469 | 4.33333 | ENSSSCT00000009835  | SCARB2   | intron     | 0.148  | rs791490063   | 2 |
| AAAC.GTTT   | 8 | 76271101 | 76271115 | 3.75    | ENSSSCT00000009840  | CCDC158  | intron     | 0.178  | 354887 rs7882 | 2 |
| AAC.GTT     | 8 | 76283154 | 76283175 | 7.33333 | ENSSSCT00000009840  | CCDC158  | intron     | 0.433  | rs789528174   | 2 |
| AC.GT       | 8 | 76552878 | 76552889 | 6       | ENSSSCT00000009841  | SHROOM3  | intron     | 0.235  | rs786629207   | 4 |
| AAAT.ATTT   | 8 | 76622407 | 76622424 | 4.5     | ENSSSCT00000009841  | SHROOM3  | intron     | -0.158 | rs790495872   | 2 |
| AAAC.GTTT   | 8 | 76760036 | 76760055 | 5       | .                   | .        | intergenic | 0.108  | .             | 2 |
| AGC.GCT     | 8 | 76760479 | 76760497 | 6.33333 | .                   | .        | intergenic | 0.141  | rs787744147   | 2 |
| AAC.GTT     | 8 | 76799178 | 76799189 | 4       | .                   | .        | intergenic | 0.208  | 344578 rs7898 | 2 |
| AAAC.GTTT   | 8 | 76841025 | 76841042 | 4.5     | ENSSSCT00000009843  | 11-Sep   | intron     | 0.034  | 351911 rs7878 | 2 |
| AAAAC.GTTTT | 8 | 76886631 | 76886649 | 3.8     | .                   | .        | intergenic | -0.13  | rs789016495   | 2 |
| AAAAC.GTTTT | 8 | 76940293 | 76940325 | 6.6     | .                   | .        | intergenic | 0.207  | 376518 rs7872 | 2 |
| AC.GT       | 8 | 76976357 | 76976367 | 5.5     | .                   | .        | intergenic | .      | .             | 2 |
| AAAC.GTTT   | 8 | 76978499 | 76978522 | 6       | .                   | .        | intergenic | 0.355  | 309497 rs7867 | 2 |
| AAAC.GTTT   | 8 | 77208423 | 77208460 | 9.5     | .                   | .        | intergenic | 0.11   | rs792264292   | 2 |
| AT.AT       | 8 | 77281229 | 77281239 | 5.5     | .                   | .        | intergenic | .      | .             | 2 |
| AT.AT       | 8 | 77475392 | 77475403 | 6       | .                   | .        | intergenic | .      | rs792092433   | 2 |
| AAT.ATT     | 8 | 77575350 | 77575362 | 4.33333 | .                   | .        | intergenic | 0.237  | .             | 2 |
| AGAT.ATCT   | 8 | 77936537 | 77936553 | 4.25    | ENSSSCT00000009848  | FRAS1    | intron     | 0.102  | rs792177883   | 2 |
| AATG.CATT   | 8 | 77945365 | 77945379 | 3.75    | ENSSSCT00000009848  | FRAS1    | intron     | 0.155  | rs793504321   | 2 |
| AC.GT       | 8 | 78013339 | 78013355 | 8.5     | ENSSSCT00000009848  | FRAS1    | intron     | 0.274  | rs793672627   | 2 |
| AG.CT       | 8 | 78177671 | 78177680 | 5       | ENSSSCT00000009848  | FRAS1    | intron     | 0.158  | .             | 2 |
| AG.CT       | 8 | 78177671 | 78177680 | 5       | ENSSSCT000000033980 | FRAS1    | intron     | 0.158  | .             | 2 |
| AGC.GCT     | 8 | 78192532 | 78192546 | 5       | ENSSSCT00000009848  | FRAS1    | intron     | -0.104 | rs793025269   | 2 |
| AGC.GCT     | 8 | 78192532 | 78192546 | 5       | ENSSSCT000000033980 | FRAS1    | intron     | -0.104 | rs793025269   | 2 |
| AAAT.ATTT   | 8 | 78417267 | 78417288 | 5.5     | .                   | .        | intergenic | -0.149 | rs791711702   | 2 |
| AAAC.GTTT   | 8 | 78675449 | 78675471 | 5.75    | .                   | .        | intergenic | 0.266  | rs789644404   | 2 |
| AAAT.ATTT   | 8 | 78744053 | 78744088 | 9       | .                   | .        | intergenic | .      | 391749 rs7880 | 2 |
| AAAAC.GTTTT | 8 | 78786674 | 78786703 | 6       | .                   | .        | intergenic | -0.085 | rs790191916   | 2 |
| AAAAG.CTTTT | 8 | 78817776 | 78817793 | 3.6     | .                   | .        | intergenic | 0.038  | rs787947846   | 2 |
| AC.GT       | 8 | 78823662 | 78823672 | 5.5     | .                   | .        | intergenic | .      | 167672 rs7928 | 4 |
| ACAT.ATGT   | 8 | 79250477 | 79250492 | 4       | .                   | .        | intergenic | .      | rs792215963   | 2 |
| AC.GT       | 8 | 79294724 | 79294744 | 10.5    | ENSSSCT00000009857  | DCHS2    | intron     | .      | .             | 2 |
| AT.AT       | 8 | 79500546 | 79500567 | 11      | .                   | .        | intergenic | 0.107  | .             | 2 |
| AAC.GTT     | 8 | 79570134 | 79570150 | 5.66667 | .                   | .        | intergenic | 0.215  | rs791836760   | 2 |
| AC.GT       | 8 | 79869007 | 79869019 | 6.5     | .                   | .        | intergenic | 0.086  | 350484 rs7929 | 2 |
| AC.GT       | 8 | 80272492 | 80272507 | 8       | ENSSSCT00000026657  | .        | intron     | 0.266  | rs787826674   | 2 |
| AC.GT       | 8 | 80595649 | 80595666 | 9       | .                   | .        | intergenic | -0.235 | rs792390679   | 2 |
| AAAC.GTTT   | 8 | 80937423 | 80937441 | 4.75    | .                   | .        | intergenic | .      | rs789524571   | 4 |
| AC.GT       | 8 | 80993290 | 80993300 | 5.5     | .                   | .        | intergenic | 0.199  | rs789829086   | 3 |
| AAAC.GTTT   | 8 | 81072583 | 81072601 | 4.75    | .                   | .        | intergenic | 0.25   | .             | 2 |
| AAAAC.GTTTT | 8 | 81429119 | 81429138 | 4       | .                   | .        | intergenic | -0.299 | rs792236132   | 3 |
| AAAC.GTTT   | 8 | 81582691 | 81582708 | 4.5     | .                   | .        | intergenic | -0.038 | rs788773572   | 2 |
| AAAAT.ATTTT | 8 | 81730123 | 81730149 | 5.4     | .                   | .        | intergenic | 0.18   | rs788081839   | 2 |
| AC.GT       | 8 | 81864449 | 81864461 | 6.5     | ENSSSCT00000009874  | .        | intron     | -0.238 | rs786425197   | 2 |
| AT.AT       | 8 | 81885890 | 81885903 | 7       | ENSSSCT00000009874  | .        | intron     | .      | 327299 rs7869 | 2 |
| AG.CT       | 8 | 81968730 | 81968740 | 5.5     | ENSSSCT00000025424  | .        | intron     | 0.004  | 197022 rs7862 | 3 |
| AG.CT       | 8 | 81968730 | 81968740 | 5.5     | ENSSSCT00000026948  | .        | intron     | 0.004  | 197022 rs7862 | 3 |
| AAAAC.GTTTT | 8 | 82013506 | 82013524 | 3.8     | .                   | .        | intergenic | 0.165  | rs790437713   | 2 |
| AG.CT       | 8 | 82631867 | 82631882 | 8       | .                   | .        | intergenic | .      | .             | 4 |

|             |   |          |          |         |                    |          |            |        |                |   |
|-------------|---|----------|----------|---------|--------------------|----------|------------|--------|----------------|---|
| AG.CT       | 8 | 83276796 | 83276818 | 11.5    | ENSSSCT00000009880 | .        | intron     | 0.592  | 170724 rs7912  | 2 |
| AC.GT       | 8 | 83310175 | 83310189 | 7.5     | ENSSSCT00000009880 | .        | intron     | 0.103  | rs793851378    | 2 |
| AC.GT       | 8 | 83716839 | 83716853 | 7.5     | ENSSSCT00000009882 | DCLK2    | intron     | -0.035 | rs787433440    | 2 |
| AAC.GTT     | 8 | 83779582 | 83779594 | 4.33333 | .                  | .        | intergenic | 0.131  | 126075 rs7931  | 2 |
| AAAAC.GTTTT | 8 | 83842194 | 83842213 | 4       | .                  | .        | intergenic | 0.094  | 177513 rs7931  | 2 |
| AC.GT       | 8 | 83934926 | 83934936 | 5.5     | .                  | .        | intergenic | .      | .              | 2 |
| AT.AT       | 8 | 84187809 | 84187819 | 5.5     | .                  | .        | intergenic | 0.056  | rs793253003    | 2 |
| AAG.CTT     | 8 | 84277153 | 84277167 | 5       | .                  | .        | intergenic | 0.208  | 131580 rs7885  | 2 |
| AAAT.ATTT   | 8 | 84305658 | 84305676 | 4.75    | .                  | .        | intergenic | 0.129  | 127282 rs7920  | 2 |
| AAAT.ATTT   | 8 | 84527843 | 84527865 | 5.75    | .                  | .        | intergenic | 0.068  | rs793842754    | 2 |
| AT.AT       | 8 | 84722179 | 84722193 | 7.5     | .                  | .        | intergenic | .      | rs793070837    | 2 |
| AC.GT       | 8 | 84918852 | 84918864 | 6.5     | .                  | .        | intergenic | -0.021 | .              | 5 |
| AAAC.GTTT   | 8 | 84945004 | 84945018 | 3.75    | .                  | .        | intergenic | .      | rs788246631    | 2 |
| AAC.GTT     | 8 | 85269813 | 85269839 | 9       | .                  | .        | intergenic | 0.199  | rs791800333    | 2 |
| AAC.GTT     | 8 | 85414360 | 85414391 | 10.6667 | .                  | .        | intergenic | 0.153  | 1789549 rs7895 | 2 |
| AAAG.CTTT   | 8 | 85711930 | 85711954 | 6.25    | ENSSSCT00000009887 | .        | intron     | 0.045  | .              | 2 |
| AAAAG.CTTTT | 8 | 85865503 | 85865520 | 3.6     | .                  | .        | intergenic | -0.086 | rs788365714    | 2 |
| AAC.GTT     | 8 | 85950160 | 85950173 | 4.66667 | ENSSSCT00000009888 | ARHGAP1C | intron     | -0.246 | rs791978842    | 2 |
| ATC.GAT     | 8 | 86234778 | 86234805 | 9.33333 | ENSSSCT00000024567 | TMEM184C | intron     | 0.348  | rs788579003    | 2 |
| AC.GT       | 8 | 86390457 | 86390469 | 6.5     | .                  | .        | intergenic | .      | rs789663181    | 2 |
| AAG.CTT     | 8 | 86510398 | 86510411 | 4.66667 | .                  | .        | intergenic | -0.119 | 125773 rs7876  | 2 |
| AAAAT.ATTTT | 8 | 86541751 | 86541765 | 3       | .                  | .        | intergenic | 0.048  | 1391942 rs7887 | 2 |
| AAGG.CCTT   | 8 | 86846923 | 86846941 | 4.75    | .                  | .        | intergenic | 0.111  | rs793300148    | 2 |
| AG.CT       | 8 | 87116246 | 87116256 | 5.5     | .                  | .        | intergenic | .      | 181012 rs7896  | 2 |
| AAAC.GTTT   | 8 | 87291578 | 87291599 | 5.5     | ENSSSCT00000009895 | SLC10A7  | intron     | .      | rs691279881    | 3 |
| AAAG.CTTT   | 8 | 87522887 | 87522928 | 10.5    | ENSSSCT00000009895 | SLC10A7  | intron     | 0.138  | 152842 rs7935  | 2 |
| AG.CT       | 8 | 87720708 | 87720718 | 5.5     | ENSSSCT00000009896 | LSM6     | intron     | 0.096  | rs792747840    | 2 |
| AC.GT       | 8 | 87939074 | 87939086 | 6.5     | ENSSSCT00000009897 | ZNF827   | intron     | 0.236  | rs711022675    | 2 |
| AC.GT       | 8 | 88065599 | 88065612 | 7       | ENSSSCT00000009897 | ZNF827   | intron     | -0.126 | rs789759401    | 2 |
| ACACT.AGTGT | 8 | 88165874 | 88165904 | 6.2     | ENSSSCT00000009899 | MMAA     | intron     | -0.095 | rs786278734    | 2 |
| AAT.ATT     | 8 | 88184186 | 88184200 | 5       | .                  | .        | intergenic | 0.031  | rs791654811    | 2 |
| ATC.GAT     | 8 | 88322671 | 88322691 | 7       | .                  | .        | intergenic | 0.148  | .              | 2 |
| AT.AT       | 8 | 88546363 | 88546375 | 6.5     | ENSSSCT00000009902 | OTUD4    | intron     | 0.019  | .              | 4 |
| AT.AT       | 8 | 88621518 | 88621534 | 8.5     | ENSSSCT00000009903 | ABCE1    | intron     | 0.196  | rs790966375    | 2 |
| AAAAC.GTTTT | 8 | 88739397 | 88739417 | 4.2     | .                  | .        | intergenic | .      | rs793582133    | 2 |
| AT.AT       | 8 | 88996470 | 88996489 | 10      | .                  | .        | intergenic | 0.328  | 127356 rs7869  | 3 |
| AAAAT.ATTTT | 8 | 89125837 | 89125854 | 3.6     | .                  | .        | intergenic | 0.134  | rs792161080    | 2 |
| AG.CT       | 8 | 89284309 | 89284319 | 5.5     | .                  | .        | intergenic | 0.059  | rs706713104    | 2 |
| AC.GT       | 8 | 89296098 | 89296120 | 11.5    | .                  | .        | intergenic | -0.048 | rs698405364    | 2 |
| AAC.GTT     | 8 | 89415374 | 89415390 | 5.66667 | ENSSSCT00000035764 | GAB1     | intron     | -0.011 | rs788670556    | 2 |
| AAC.GTT     | 8 | 89415374 | 89415390 | 5.66667 | ENSSSCT00000032897 | GAB1     | intron     | -0.011 | rs788670556    | 2 |
| AAC.GTT     | 8 | 89415374 | 89415390 | 5.66667 | ENSSSCT00000009909 | GAB1     | intron     | -0.011 | rs788670556    | 2 |
| AAC.GTT     | 8 | 89415374 | 89415390 | 5.66667 | ENSSSCT00000034785 | GAB1     | intron     | -0.011 | rs788670556    | 2 |
| ACAT.ATGT   | 8 | 89442988 | 89443003 | 4       | ENSSSCT00000035764 | GAB1     | intron     | -0.058 | rs792609848    | 2 |
| ACAT.ATGT   | 8 | 89442988 | 89443003 | 4       | ENSSSCT00000032897 | GAB1     | intron     | -0.058 | rs792609848    | 2 |
| ACAT.ATGT   | 8 | 89442988 | 89443003 | 4       | ENSSSCT00000009909 | GAB1     | intron     | -0.058 | rs792609848    | 2 |
| ACAT.ATGT   | 8 | 89442988 | 89443003 | 4       | ENSSSCT00000034785 | GAB1     | intron     | -0.058 | rs792609848    | 2 |
| AC.GT       | 8 | 89698438 | 89698455 | 9       | .                  | .        | intergenic | .      | .              | 4 |
| AAAAC.GTTTT | 8 | 89809327 | 89809350 | 4       | .                  | .        | intergenic | .      | rs786532742    | 2 |
| AT.AT       | 8 | 89828034 | 89828043 | 5       | .                  | .        | intergenic | .      | rs791236800    | 2 |
| AT.AT       | 8 | 89970000 | 89970011 | 6       | .                  | .        | intergenic | .      | rs791283052    | 2 |
| AC.GT       | 8 | 90061360 | 90061372 | 6.5     | .                  | .        | intergenic | .      | .              | 3 |
| AAAAG.CTTTT | 8 | 90163843 | 90163870 | 5.6     | .                  | .        | intergenic | -0.319 | .              | 2 |
| ACAT.ATGT   | 8 | 90200161 | 90200184 | 6       | .                  | .        | intergenic | 0.086  | rs701251270    | 2 |
| AAAC.GTTT   | 8 | 90475084 | 90475104 | 5.25    | .                  | .        | intergenic | 0.02   | rs789986005    | 2 |
| AAAAG.CTTTT | 8 | 90568094 | 90568121 | 4.66667 | .                  | .        | intergenic | -0.027 | rs788664084    | 2 |
| AT.AT       | 8 | 91041190 | 91041200 | 5.5     | .                  | .        | intergenic | -0.21  | .              | 3 |
| AT.AT       | 8 | 91047381 | 91047390 | 5       | .                  | .        | intergenic | 0.162  | .              | 2 |
| AAAG.CTTT   | 8 | 91159653 | 91159676 | 6       | .                  | .        | intergenic | 0.223  | 1582107 rs7935 | 2 |
| AC.GT       | 8 | 91406975 | 91406985 | 5.5     | .                  | .        | intergenic | .      | rs704900651    | 2 |
| AAT.ATT     | 8 | 91429833 | 91429859 | 9       | .                  | .        | intergenic | .      | .              | 2 |
| AT.AT       | 8 | 91673450 | 91673461 | 6       | ENSSSCT00000009917 | RNF150   | intron     | 0.082  | rs793444097    | 2 |
| AAAC.GTTT   | 8 | 91820233 | 91820254 | 5.5     | .                  | .        | intergenic | 0.005  | 133014 rs7881  | 2 |
| AG.CT       | 8 | 91929226 | 91929239 | 7       | .                  | .        | intergenic | 0.909  | rs788170884    | 2 |
| AAAAC.GTTTT | 8 | 91942921 | 91942946 | 4.33333 | .                  | .        | intergenic | 4.676  | 1394968 rs7932 | 2 |
| AT.AT       | 8 | 92117882 | 92117898 | 8.5     | ENSSSCT00000025519 | CLGN     | intron     | .      | 145227 rs7912  | 2 |
| AAAC.GTTT   | 8 | 92349182 | 92349209 | 7       | .                  | .        | intergenic | .      | rs692904740    | 3 |
| AC.GT       | 8 | 92360455 | 92360469 | 7.5     | .                  | .        | intergenic | -0.108 | rs792902566    | 2 |
| AAAG.CTTT   | 8 | 92412029 | 92412060 | 8       | .                  | .        | intergenic | 0.13   | 110659 rs7913  | 2 |
| AAAAG.CTTTT | 8 | 92413018 | 92413036 | 3.8     | .                  | .        | intergenic | -0.118 | 1303559 rs7921 | 2 |
| AG.CT       | 8 | 92443487 | 92443503 | 8.5     | .                  | .        | intergenic | 1.363  | .              | 2 |
| AAAC.GTTT   | 8 | 92471131 | 92471154 | 6       | .                  | .        | intergenic | 0.05   | rs793575196    | 2 |
| AG.CT       | 8 | 92776289 | 92776313 | 12.5    | ENSSSCT00000009924 | MAML3    | intron     | 0.234  | 124362 rs7894  | 2 |
| AAAT.ATTT   | 8 | 92794722 | 92794742 | 5.25    | ENSSSCT00000009924 | MAML3    | intron     | 0.014  | rs789976924    | 2 |
| AC.GT       | 8 | 92844092 | 92844103 | 6       | ENSSSCT00000009924 | MAML3    | intron     | -0.016 | rs790696088    | 2 |
| AAAT.ATTT   | 8 | 93171338 | 93171359 | 5.5     | ENSSSCT00000023019 | SETD7    | promoter   | -0.012 | rs793676997    | 2 |
| AAAC.GTTT   | 8 | 93273732 | 93273743 | 3       | ENSSSCT00000009925 | NAA15    | intron     | 0.302  | .              | 2 |
| AGG.CCT     | 8 | 93637680 | 93637711 | 10.6667 | .                  | .        | intergenic | -0.015 | rs789146764    | 4 |
| GAGGG.CCCTC | 8 | 93655286 | 93655304 | 3.16667 | .                  | .        | intergenic | 0.312  | 1302878 rs7891 | 2 |
| AC.GT       | 8 | 93683940 | 93683958 | 9.5     | .                  | .        | intergenic | 0.125  | 1244728 rs7921 | 2 |
| AAT.ATT     | 8 | 93700622 | 93700641 | 6.66667 | .                  | .        | intergenic | -0.114 | rs793011633    | 2 |
| AAAC.GTTT   | 8 | 93789494 | 93789509 | 4       | .                  | .        | intergenic | 0.89   | rs788256051    | 4 |
| AG.CT       | 8 | 93832230 | 93832246 | 8.5     | .                  | .        | intergenic | 0.32   | rs792370359    | 2 |
| AAAAC.GTTTT | 8 | 93915894 | 93915921 | 4.66667 | .                  | .        | intergenic | .      | 120826 rs7882  | 2 |

|               |   |           |           |         |                   |       |            |        |                  |   |
|---------------|---|-----------|-----------|---------|-------------------|-------|------------|--------|------------------|---|
| AAAAT.ATTTT   | 8 | 93933067  | 93933093  | 5.4     | .                 | .     | intergenic | 0.031  | rs791942175      | 2 |
| AC.GT         | 8 | 94000650  | 94000673  | 12      | .                 | .     | intergenic | 0.199  | rs706451 rs7917  | 2 |
| AT.AT         | 8 | 94721307  | 94721322  | 8       | .                 | .     | intergenic | .      | rs788303461      | 2 |
| AAAAT.ATTTT   | 8 | 94742901  | 94742934  | 6.8     | .                 | .     | intergenic | 0.072  | rs71436 rs7895   | 2 |
| AC.GT         | 8 | 94977359  | 94977369  | 5.5     | .                 | .     | intergenic | -0.1   | .                | 4 |
| AT.AT         | 8 | 95017884  | 95017894  | 5.5     | .                 | .     | intergenic | 0.068  | .                | 3 |
| AC.GT         | 8 | 95067400  | 95067413  | 7       | .                 | .     | intergenic | -0.069 | .                | 3 |
| AAAT.ATTT     | 8 | 95614715  | 95614727  | 3.25    | .                 | .     | intergenic | -0.37  | rs792132135      | 2 |
| AT.AT         | 8 | 95621757  | 95621768  | 6       | .                 | .     | intergenic | .      | rs789346333      | 2 |
| AAAT.ATTT     | 8 | 95952526  | 95952544  | 4.75    | .                 | .     | intergenic | -0.218 | rs793514596      | 2 |
| AC.GT         | 8 | 96173489  | 96173508  | 10      | .                 | .     | intergenic | 0.026  | .                | 4 |
| AC.GT         | 8 | 96650931  | 96650956  | 13      | .                 | .     | intergenic | -0.14  | rs702409172      | 2 |
| AC.GT         | 8 | 96744815  | 96744827  | 6.5     | .                 | .     | intergenic | .      | .                | 3 |
| AT.AT         | 8 | 96756116  | 96756127  | 6       | .                 | .     | intergenic | .      | rs793734143      | 2 |
| AAC.GTT       | 8 | 96864549  | 96864575  | 9       | .                 | .     | intergenic | 0.11   | rs76630 rs7880   | 2 |
| AAT.ATT       | 8 | 97207244  | 97207266  | 7.66667 | .                 | .     | intergenic | .      | .                | 2 |
| AAT.ATT       | 8 | 97450882  | 97450893  | 4       | .                 | .     | intergenic | -0.077 | rs722870 rs7910  | 2 |
| AT.AT         | 8 | 97593048  | 97593059  | 6       | .                 | .     | intergenic | -0.039 | rs793203853      | 2 |
| AAT.ATT       | 8 | 97594584  | 97594596  | 4.33333 | .                 | .     | intergenic | 0.034  | rs712499 rs7871  | 2 |
| ACAT.ATGT     | 8 | 97960232  | 97960256  | 6.25    | .                 | .     | intergenic | -0.136 | rs793563877      | 2 |
| AAAAC.GTTTT   | 8 | 98473310  | 98473330  | 4.2     | .                 | .     | intergenic | 0.136  | rs762525 rs7928  | 2 |
| AT.AT         | 8 | 98667735  | 98667744  | 5       | .                 | .     | intergenic | -0.073 | rs790893134      | 2 |
| AAAC.GTTT     | 8 | 99048097  | 99048122  | 6.5     | .                 | .     | intergenic | -0.133 | rs789978003      | 2 |
| AC.GT         | 8 | 99729898  | 99729910  | 6.5     | .                 | .     | intergenic | -0.11  | rs792405928      | 2 |
| AC.GT         | 8 | 99817925  | 99817949  | 12.5    | .                 | .     | intergenic | .      | .                | 2 |
| AAG.CTT       | 8 | 99846058  | 99846075  | 6       | .                 | .     | intergenic | 0.356  | rs751730 rs6964  | 2 |
| AAT.ATT       | 8 | 99918683  | 99918695  | 4.33333 | .                 | .     | intergenic | -0.101 | rs767361 rs7894  | 2 |
| AAAATT.AATTTT | 8 | 100234007 | 100234034 | 4.66667 | .                 | .     | intergenic | .      | .                | 2 |
| AT.AT         | 8 | 100275194 | 100275204 | 5.5     | .                 | .     | intergenic | 0.443  | .                | 2 |
| AAC.GTT       | 8 | 100401074 | 100401086 | 4.33333 | .                 | .     | intergenic | 0.057  | .                | 2 |
| AC.GT         | 8 | 100444141 | 100444167 | 13.5    | .                 | .     | intergenic | 0.094  | rs749730 rs7866  | 3 |
| AAAC.GTTT     | 8 | 100645317 | 100645344 | 7       | .                 | .     | intergenic | .      | rs791913849      | 2 |
| AT.AT         | 8 | 100836210 | 100836220 | 5.5     | .                 | .     | intergenic | 0.095  | rs748702 rs7932  | 2 |
| AAAC.GTTT     | 8 | 100837552 | 100837569 | 4.5     | .                 | .     | intergenic | .      | rs787056481      | 2 |
| AT.AT         | 8 | 100856552 | 100856579 | 14      | .                 | .     | intergenic | -0.158 | .                | 2 |
| AG.CT         | 8 | 101080528 | 101080540 | 6.5     | .                 | .     | intergenic | 0.347  | rs789979081      | 2 |
| AC.GT         | 8 | 101333963 | 101333978 | 8       | .                 | .     | intergenic | -0.051 | rs768895 rs7881  | 2 |
| AAG.CTT       | 8 | 101415998 | 101416010 | 4.33333 | .                 | .     | intergenic | -0.271 | rs7524760 rs7938 | 2 |
| AG.CT         | 8 | 101495129 | 101495141 | 6.5     | .                 | .     | intergenic | 0.143  | rs742192 rs7873  | 2 |
| AAG.CTT       | 8 | 101700130 | 101700145 | 5.33333 | .                 | .     | intergenic | .      | rs786424775      | 2 |
| AAT.ATT       | 8 | 101701559 | 101701573 | 5       | .                 | .     | intergenic | -0.044 | rs747959 rs7911  | 2 |
| AAC.GTT       | 8 | 101746947 | 101746958 | 4       | .                 | .     | intergenic | 0.09   | rs791926486      | 4 |
| AAATT.AATTT   | 8 | 101834134 | 101834148 | 3       | .                 | .     | intergenic | -0.089 | rs791137508      | 2 |
| AAAG.CTTT     | 8 | 102181908 | 102181932 | 6.25    | .                 | .     | intergenic | 0.631  | .                | 2 |
| AT.AT         | 8 | 102185659 | 102185674 | 8       | .                 | .     | intergenic | -0.024 | rs710100018      | 4 |
| AT.AT         | 8 | 102285986 | 102285995 | 5       | .                 | .     | intergenic | .      | rs787640464      | 3 |
| AG.CT         | 8 | 102347106 | 102347122 | 8.5     | .                 | .     | intergenic | 0.86   | rs769401 rs7863  | 2 |
| AT.AT         | 8 | 102521872 | 102521881 | 5       | .                 | .     | intergenic | .      | rs790207742      | 2 |
| AT.AT         | 8 | 102970805 | 102970821 | 8.5     | .                 | .     | intergenic | 0.31   | rs790056631      | 2 |
| AG.CT         | 8 | 103259266 | 103259282 | 8.5     | .                 | .     | intergenic | -0.072 | rs786630660      | 4 |
| AT.AT         | 8 | 103326644 | 103326657 | 7       | .                 | .     | intergenic | .      | rs7547645 rs7926 | 4 |
| ACAT.ATGT     | 8 | 103452423 | 103452442 | 5       | .                 | .     | intergenic | 0.08   | rs787222517      | 2 |
| AAAT.ATTT     | 8 | 103551882 | 103551908 | 6.75    | .                 | .     | intergenic | .      | .                | 3 |
| AAC.GTT       | 8 | 103588600 | 103588613 | 4.66667 | .                 | .     | intergenic | 0.267  | rs786235878      | 2 |
| AG.CT         | 8 | 104156558 | 104156570 | 6.5     | .                 | .     | intergenic | 0.117  | rs791212598      | 2 |
| AC.GT         | 8 | 104174261 | 104174273 | 6.5     | .                 | .     | intergenic | 0.267  | rs759430 rs7864  | 2 |
| AT.AT         | 8 | 104487782 | 104487812 | 15.5    | .                 | .     | intergenic | 0.117  | rs791965747      | 2 |
| AC.GT         | 8 | 104614747 | 104614760 | 7       | .                 | .     | intergenic | 0.173  | rs738966 rs7870  | 4 |
| AAAT.ATTT     | 8 | 104830684 | 104830700 | 4.25    | .                 | .     | intergenic | .      | rs789251433      | 2 |
| AT.AT         | 8 | 104873226 | 104873236 | 5.5     | .                 | .     | intergenic | 0.031  | rs787418768      | 3 |
| AT.AT         | 8 | 104892053 | 104892067 | 7.5     | .                 | .     | intergenic | 0.075  | rs748484 rs7890  | 2 |
| AT.AT         | 8 | 104982112 | 104982122 | 5.5     | .                 | .     | intergenic | 0.115  | rs792059120      | 4 |
| AC.GT         | 8 | 104995039 | 104995059 | 10.5    | .                 | .     | intergenic | -0.088 | rs792114878      | 4 |
| AAT.ATT       | 8 | 105201215 | 105201228 | 4.66667 | .                 | .     | intergenic | 0.06   | rs787373892      | 2 |
| AT.AT         | 8 | 105208019 | 105208030 | 6       | .                 | .     | intergenic | 0.173  | rs786486203      | 2 |
| AAAC.GTTT     | 8 | 105296521 | 105296535 | 3.75    | .                 | .     | intergenic | 0.164  | rs793715082      | 2 |
| AAAC.GTTT     | 8 | 105302566 | 105302594 | 7.25    | .                 | .     | intergenic | 0.138  | rs754657 rs7863  | 2 |
| AAT.ATT       | 8 | 105382277 | 105382302 | 8.66667 | .                 | .     | intergenic | 0.09   | rs789047280      | 2 |
| AC.GT         | 8 | 105801999 | 105802016 | 9       | .                 | .     | intergenic | -0.097 | rs794229 rs7912  | 2 |
| AAC.GTT       | 8 | 106293540 | 106293555 | 5.33333 | .                 | .     | intergenic | 0.145  | rs788424993      | 2 |
| AAC.GTT       | 8 | 106575308 | 106575320 | 4.33333 | .                 | .     | intergenic | .      | rs76083 rs7928   | 2 |
| AAAC.GTTT     | 8 | 106678236 | 106678262 | 6.75    | .                 | .     | intergenic | 0.064  | rs793088360      | 2 |
| AT.AT         | 8 | 106853438 | 106853457 | 10      | .                 | .     | intergenic | 0.118  | rs789312532      | 2 |
| AG.CT         | 8 | 107110857 | 107110869 | 6.5     | .                 | .     | intergenic | -0.051 | rs706728 rs7938  | 2 |
| AC.GT         | 8 | 107256051 | 107256071 | 10.5    | .                 | .     | intergenic | .      | .                | 2 |
| AAC.GTT       | 8 | 107263218 | 107263232 | 5       | .                 | .     | intergenic | .      | .                | 2 |
| AAC.GTT       | 8 | 107439524 | 107439537 | 4.66667 | .                 | .     | intergenic | 0.834  | rs7272483 rs7932 | 2 |
| CACAG.CTGTG   | 8 | 107541120 | 107541143 | 4       | .                 | .     | intergenic | 0.705  | rs702978370      | 2 |
| AAAC.GTTT     | 8 | 107545062 | 107545084 | 5.75    | .                 | .     | intergenic | 0.252  | rs793206206      | 2 |
| AAAAC.GTTTT   | 8 | 107760093 | 107760111 | 3.8     | .                 | .     | intergenic | 0.026  | rs789072172      | 2 |
| AAT.ATT       | 8 | 107951135 | 107951156 | 7.33333 | .                 | .     | intergenic | 0.287  | .                | 2 |
| AC.GT         | 8 | 108092922 | 108092945 | 12      | ENSSSCT0000009949 | SPRY1 | intron     | .      | .                | 4 |
| AAAC.GTTT     | 8 | 108143946 | 108143968 | 5.75    | ENSSSCT0000009949 | SPRY1 | intron     | 0.061  | rs791728360      | 2 |
| AT.AT         | 8 | 108262947 | 108262956 | 5       | .                 | .     | intergenic | 0.312  | rs788404786      | 2 |



|             |   |           |           |         |                    |          |            |        |             |        |   |
|-------------|---|-----------|-----------|---------|--------------------|----------|------------|--------|-------------|--------|---|
| AAAG.CTTT   | 8 | 108381713 | 108381753 | 10.25   | ENSSSCT0000009950  | SPATA5   | intron     | 0.232  | rs210723    | rs7903 | 3 |
| AG.CT       | 8 | 108388784 | 108388798 | 7.5     | ENSSSCT0000009950  | SPATA5   | intron     | .      | rs214349    | rs7880 | 2 |
| AT.AT       | 8 | 108485432 | 108485444 | 6.5     | ENSSSCT0000009951  | NUDT6    | intron     | 0.167  | .           | .      | 2 |
| AAAT.ATTT   | 8 | 108495015 | 108495027 | 3.25    | ENSSSCT0000009952  | FGF2     | intron     | 0.157  | .           | .      | 2 |
| AG.CT       | 8 | 108609204 | 108609214 | 5.5     | .                  | .        | intergenic | 0.972  | .           | .      | 4 |
| AAAC.GTTT   | 8 | 108995826 | 108995840 | 3.75    | ENSSSCT0000009956  | KIAA1109 | intron     | .      | rs792396051 | .      | 2 |
| AT.AT       | 8 | 108999661 | 108999678 | 9       | ENSSSCT0000009956  | KIAA1109 | intron     | .      | .           | .      | 2 |
| AAG.CTT     | 8 | 109681454 | 109681466 | 4.33333 | .                  | .        | intergenic | .      | rs788384789 | .      | 2 |
| AC.GT       | 8 | 110097270 | 110097284 | 7.5     | .                  | .        | intergenic | 0.121  | .           | .      | 2 |
| GAGAT.ATCTC | 8 | 110513523 | 110513541 | 3.16667 | ENSSSCT00000030696 | .        | intron     | -0.002 | rs792516854 | .      | 2 |
| AAAC.GTTT   | 8 | 110558082 | 110558104 | 5.75    | .                  | .        | intergenic | 0.14   | rs786901201 | .      | 2 |
| AT.AT       | 8 | 110765689 | 110765698 | 5       | ENSSSCT0000009967  | PRDM5    | intron     | -0.002 | rs78097     | rs7929 | 2 |
| AT.AT       | 8 | 110765689 | 110765698 | 5       | ENSSSCT00000021244 | U6       | promoter   | -0.002 | rs78097     | rs7929 | 2 |
| AAAC.GTTT   | 8 | 111071878 | 111071904 | 6.75    | .                  | .        | intergenic | 0.084  | rs111202    | rs7902 | 2 |
| AC.GT       | 8 | 111106857 | 111106868 | 6       | .                  | .        | intergenic | .      | rs308491    | rs7884 | 2 |
| AAT.ATT     | 8 | 111195550 | 111195563 | 4.66667 | .                  | .        | intergenic | 0.128  | rs786430177 | .      | 2 |
| AG.CT       | 8 | 111288955 | 111288967 | 6.5     | .                  | .        | intergenic | -0.146 | rs327598    | rs7881 | 2 |
| AC.GT       | 8 | 111303333 | 111303345 | 6.5     | .                  | .        | intergenic | -0.098 | rs790480222 | .      | 2 |
| AAAT.ATTT   | 8 | 111378902 | 111378919 | 4.5     | .                  | .        | intergenic | .      | rs15065     | rs7885 | 2 |
| AAAG.CTTT   | 8 | 111403123 | 111403141 | 4.75    | .                  | .        | intergenic | 0.166  | rs169556    | rs7907 | 2 |
| AC.GT       | 8 | 111495352 | 111495363 | 6       | ENSSSCT0000009971  | MAD2L1   | promoter   | 0.018  | .           | .      | 2 |
| AG.CT       | 8 | 111591447 | 111591456 | 5       | .                  | .        | intergenic | .      | rs690841189 | .      | 4 |
| AAAG.CTTT   | 8 | 111636268 | 111636291 | 6       | .                  | .        | intergenic | 0.144  | rs389676    | rs7863 | 2 |
| AAAT.ATTT   | 8 | 111994856 | 111994871 | 4       | ENSSSCT0000009973  | PDE5A    | intron     | .      | .           | .      | 2 |
| AAAAG.CTTTT | 8 | 112041190 | 112041211 | 3.66667 | ENSSSCT0000009973  | PDE5A    | intron     | 0.095  | rs788113733 | .      | 2 |
| AAAAG.CTTTT | 8 | 112122113 | 112122129 | 3.4     | ENSSSCT00000035856 | FABP2    | intron     | 0.128  | rs394632    | rs7876 | 2 |
| AAAAG.CTTTT | 8 | 112122113 | 112122129 | 3.4     | ENSSSCT00000030658 | FABP2    | intron     | 0.128  | rs394632    | rs7876 | 2 |
| AAAC.GTTT   | 8 | 112135087 | 112135100 | 3.5     | .                  | .        | intergenic | .      | rs790237937 | .      | 2 |
| AAAC.GTTT   | 8 | 112603697 | 112603719 | 5.75    | ENSSSCT0000009979  | .        | intron     | -0.041 | rs789549504 | .      | 2 |
| AAAC.GTTT   | 8 | 112809590 | 112809617 | 7       | .                  | .        | intergenic | .      | rs791407909 | .      | 2 |
| AT.AT       | 8 | 112820185 | 112820199 | 7.5     | .                  | .        | intergenic | 0.047  | .           | .      | 2 |
| ACACT.AGTGT | 8 | 112900431 | 112900445 | 3       | ENSSSCT0000009981  | PRSS12   | intron     | 0.108  | rs786771795 | .      | 2 |
| AAAC.GTTT   | 8 | 112903285 | 112903310 | 6.5     | ENSSSCT0000009981  | PRSS12   | intron     | 0.087  | rs373533    | rs7880 | 2 |
| AT.AT       | 8 | 112996784 | 112996794 | 5.5     | ENSSSCT0000009982  | NDST3    | intron     | .      | .           | .      | 4 |
| AC.GT       | 8 | 113257079 | 113257094 | 8       | .                  | .        | intergenic | 0.042  | rs791835984 | .      | 2 |
| AAAAT.ATTTT | 8 | 113270875 | 113270892 | 3.6     | .                  | .        | intergenic | 0.38   | rs787778535 | .      | 2 |
| AGC.GCT     | 8 | 113289327 | 113289342 | 5.33333 | .                  | .        | intergenic | 0.163  | rs787003031 | .      | 2 |
| AAC.GTT     | 8 | 113318763 | 113318776 | 4.66667 | .                  | .        | intergenic | -0.019 | rs786861597 | .      | 2 |
| AAAT.ATTT   | 8 | 113606573 | 113606597 | 6.25    | .                  | .        | intergenic | .      | rs788957871 | .      | 2 |
| AC.GT       | 8 | 113688705 | 113688720 | 8       | .                  | .        | intergenic | -0.015 | rs373231    | rs7925 | 2 |
| AAGG.CCTT   | 8 | 113699388 | 113699407 | 5       | .                  | .        | intergenic | .      | .           | .      | 2 |
| AC.GT       | 8 | 114045852 | 114045862 | 5.5     | .                  | .        | intergenic | .      | rs792796016 | .      | 3 |
| AT.AT       | 8 | 114292780 | 114292789 | 5       | .                  | .        | intergenic | -0.158 | rs786224148 | .      | 2 |
| AC.GT       | 8 | 114553226 | 114553237 | 6       | .                  | .        | intergenic | -0.077 | rs786765022 | .      | 2 |
| AC.GT       | 8 | 114973363 | 114973377 | 7.5     | .                  | .        | intergenic | .      | rs793548375 | .      | 2 |
| AC.GT       | 8 | 115438765 | 115438776 | 6       | .                  | .        | intergenic | .      | .           | .      | 2 |
| AC.GT       | 8 | 115442798 | 115442824 | 13.5    | .                  | .        | intergenic | .      | rs788483292 | .      | 3 |
| AG.CT       | 8 | 115597542 | 115597552 | 5.5     | .                  | .        | intergenic | 0.033  | rs790638724 | .      | 2 |
| AG.CT       | 8 | 115645949 | 115645959 | 5.5     | .                  | .        | intergenic | -0.225 | .           | .      | 4 |
| AG.CT       | 8 | 115845728 | 115845748 | 10.5    | .                  | .        | intergenic | -0.037 | rs183552    | rs7874 | 2 |
| AG.CT       | 8 | 115880801 | 115880815 | 7.5     | .                  | .        | intergenic | .      | rs343722    | rs7920 | 2 |
| AC.GT       | 8 | 115972875 | 115972921 | 23.5    | ENSSSCT00000029398 | UGT8     | 3'utr      | 1.228  | rs389545    | rs7882 | 2 |
| AG.CT       | 8 | 116233051 | 116233064 | 7       | ENSSSCT00000024625 | .        | intron     | -0.172 | .           | .      | 2 |
| AG.CT       | 8 | 116368299 | 116368312 | 7       | .                  | .        | intergenic | 0.14   | .           | .      | 3 |
| AATG.CATT   | 8 | 116830221 | 116830234 | 3.5     | .                  | .        | intergenic | 0.048  | .           | .      | 2 |
| AAAAC.GTTTT | 8 | 116948960 | 116948979 | 4       | .                  | .        | intergenic | 0.145  | rs787665149 | .      | 2 |
| AC.GT       | 8 | 116956673 | 116956688 | 8       | ENSSSCT0000009990  | CAMK2D   | intron     | 0.854  | rs355099    | rs7891 | 2 |
| AAAC.GTTT   | 8 | 116976907 | 116976924 | 4.5     | ENSSSCT0000009990  | CAMK2D   | intron     | 0.134  | rs789776342 | .      | 2 |
| AAAAC.GTTTT | 8 | 117095484 | 117095514 | 6.2     | ENSSSCT0000009990  | CAMK2D   | intron     | 0.022  | rs788878118 | .      | 2 |
| AAG.CTT     | 8 | 117167096 | 117167107 | 4       | ENSSSCT0000009990  | CAMK2D   | intron     | .      | rs389042    | rs7923 | 2 |
| AAAAT.ATTTT | 8 | 117451972 | 117451994 | 4.6     | ENSSSCT0000009992  | ANK2     | intron     | 0.1    | rs791707787 | .      | 2 |
| AAAG.CTTT   | 8 | 117541785 | 117541803 | 4.75    | ENSSSCT0000009992  | ANK2     | intron     | 0.095  | rs180799    | rs7928 | 2 |
| AAC.GTT     | 8 | 117778506 | 117778517 | 4       | .                  | .        | intergenic | .      | rs791705206 | .      | 2 |
| AAAT.ATTT   | 8 | 117911169 | 117911196 | 7       | .                  | .        | intergenic | .      | .           | .      | 2 |
| AG.CT       | 8 | 117969106 | 117969120 | 7.5     | .                  | .        | intergenic | 0.135  | rs19882     | rs7923 | 2 |
| AAAT.ATTT   | 8 | 118281050 | 118281071 | 5.5     | .                  | .        | intergenic | 0.015  | rs138271    | rs7932 | 3 |
| AAT.ATT     | 8 | 118376886 | 118376906 | 7       | ENSSSCT0000009996  | AP1AR    | intron     | 0.268  | rs340800    | rs7862 | 4 |
| AC.GT       | 8 | 118414878 | 118414894 | 8.5     | .                  | .        | intergenic | .      | .           | .      | 2 |
| AT.AT       | 8 | 118517659 | 118517684 | 13      | .                  | .        | intergenic | 0.328  | rs701802493 | .      | 2 |
| AAAT.ATTT   | 8 | 118709493 | 118709510 | 4.5     | .                  | .        | intergenic | 0.019  | .           | .      | 2 |
| AAAC.GTTT   | 8 | 118846705 | 118846723 | 4.75    | .                  | .        | intergenic | .      | rs311913    | rs7928 | 2 |
| AG.CT       | 8 | 118914274 | 118914289 | 8       | .                  | .        | intergenic | 0.07   | rs340658    | rs7071 | 2 |
| AAAAC.GTTTT | 8 | 118937719 | 118937758 | 6.66667 | .                  | .        | intergenic | -0.065 | rs792488552 | .      | 3 |
| ATC.GAT     | 8 | 119088909 | 119088933 | 8.33333 | .                  | .        | intergenic | .      | rs793541332 | .      | 3 |
| AAAC.GTTT   | 8 | 119274291 | 119274322 | 8       | .                  | .        | intergenic | 0.049  | rs363414    | rs7918 | 2 |
| AT.AT       | 8 | 119277574 | 119277608 | 17.5    | .                  | .        | intergenic | .      | rs786908678 | .      | 2 |
| AAAG.CTTT   | 8 | 119376537 | 119376561 | 6.25    | .                  | .        | intergenic | 0.585  | rs151872    | rs7919 | 2 |
| AAC.GTT     | 8 | 119497860 | 119497873 | 4.66667 | .                  | .        | intergenic | 1.4    | rs151216    | rs7887 | 2 |
| AC.GT       | 8 | 119715124 | 119715145 | 11      | .                  | .        | intergenic | 0.444  | rs378112    | rs7919 | 3 |
| AAT.ATT     | 8 | 119753001 | 119753017 | 5.66667 | .                  | .        | intergenic | 0.046  | rs793214643 | .      | 2 |
| AAAT.ATTT   | 8 | 119841495 | 119841526 | 8       | .                  | .        | intergenic | 0.113  | rs367433    | rs7922 | 2 |
| AAAG.CTTT   | 8 | 119842718 | 119842735 | 4.5     | .                  | .        | intergenic | 0.076  | rs792461767 | .      | 2 |
| AAAC.GTTT   | 8 | 119939656 | 119939667 | 3       | .                  | .        | intergenic | -0.247 | rs788918506 | .      | 2 |
| ACT.AGT     | 8 | 119981230 | 119981241 | 4       | ENSSSCT00000036057 | ENPEP    | intron     | 0.154  | rs308348    | rs7935 | 2 |

|              |   |           |           |         |                    |         |            |        |               |   |
|--------------|---|-----------|-----------|---------|--------------------|---------|------------|--------|---------------|---|
| ACT.AGT      | 8 | 119981230 | 119981241 | 4       | ENSSSCT00000010000 | ENPEP   | intron     | 0.154  | 308348 rs7935 | 2 |
| AAAAG.CTTTT  | 8 | 119992546 | 119992562 | 3.4     | ENSSSCT00000010000 | ENPEP   | intron     | 1.055  | rs786399137   | 2 |
| AGGG.CCCT    | 8 | 120160210 | 120160221 | 3       | ENSSSCT00000024189 | ELOVL6  | intron     | 0.023  | .             | 2 |
| ACATAT.ATATG | 8 | 120174113 | 120174131 | 3.16667 | ENSSSCT00000024189 | ELOVL6  | intron     | .      | .             | 2 |
| AT.AT        | 8 | 120202080 | 120202090 | 5.5     | ENSSSCT00000024189 | ELOVL6  | intron     | -0.058 | .             | 4 |
| AAAAC.GTTTT  | 8 | 120227275 | 120227303 | 5.8     | .                  | .       | intergenic | .      | rs792340338   | 2 |
| AAAG.CTTT    | 8 | 120483186 | 120483200 | 3.75    | ENSSSCT00000010004 | RRH     | promoter   | 0.124  | rs792431228   | 2 |
| AT.AT        | 8 | 120607456 | 120607466 | 5.5     | .                  | .       | intergenic | .      | .             | 4 |
| AAAAT.ATTTT  | 8 | 121247229 | 121247245 | 3.4     | .                  | .       | intergenic | 0.127  | rs790804683   | 2 |
| AGG.CCT      | 8 | 121335063 | 121335080 | 6       | .                  | .       | intergenic | .      | rs787964174   | 2 |
| AC.GT        | 8 | 121411454 | 121411466 | 6.5     | ENSSSCT00000010011 | .       | intron     | 0.031  | 399918 rs7914 | 2 |
| AAAC.GTTT    | 8 | 121434172 | 121434200 | 7.25    | ENSSSCT00000010011 | .       | intron     | .      | 144518 rs7881 | 2 |
| AAC.GTT      | 8 | 121637989 | 121638011 | 7.66667 | .                  | .       | intergenic | 0.002  | rs787441065   | 3 |
| AAAAC.GTTTT  | 8 | 121782039 | 121782057 | 3.8     | .                  | .       | intergenic | 0.012  | 302571 rs7920 | 2 |
| AAAC.GTTT    | 8 | 121957122 | 121957150 | 7.25    | .                  | .       | intergenic | .      | rs789408800   | 2 |
| AC.GT        | 8 | 121988548 | 121988558 | 5.5     | .                  | .       | intergenic | -0.032 | rs793128255   | 2 |
| AAAAC.GTTTT  | 8 | 122207416 | 122207443 | 5.6     | .                  | .       | intergenic | 0.128  | rs791222352   | 2 |
| AAC.GTT      | 8 | 122312364 | 122312376 | 4.33333 | .                  | .       | intergenic | 0.202  | rs787719870   | 2 |
| AC.GT        | 8 | 122318003 | 122318014 | 6       | ENSSSCT00000010022 | SGMS2   | 3'utr      | -0.038 | .             | 4 |
| AT.AT        | 8 | 122552445 | 122552454 | 5       | .                  | .       | intergenic | -0.043 | .             | 3 |
| ACAT.ATGT    | 8 | 122560314 | 122560335 | 5.5     | .                  | .       | intergenic | -0.107 | .             | 2 |
| AC.GT        | 8 | 122570514 | 122570540 | 13.5    | .                  | .       | intergenic | .      | rs690951549   | 2 |
| AG.CT        | 8 | 122665874 | 122665885 | 6       | .                  | .       | intergenic | 0.02   | .             | 4 |
| AAT.ATT      | 8 | 122872638 | 122872651 | 4.66667 | .                  | .       | intergenic | .      | rs788426830   | 2 |
| AAAGG.CCTTT  | 8 | 122876328 | 122876352 | 5       | .                  | .       | intergenic | .      | 307228 rs7897 | 2 |
| AT.AT        | 8 | 122950347 | 122950358 | 6       | .                  | .       | intergenic | .      | rs789594708   | 2 |
| AG.CT        | 8 | 123029424 | 123029433 | 5       | .                  | .       | intergenic | -0.007 | 323753 rs7928 | 2 |
| AC.GT        | 8 | 123219759 | 123219783 | 12.5    | .                  | .       | intergenic | 0.449  | rs791708142   | 2 |
| AAAC.GTTT    | 8 | 123263287 | 123263305 | 4.75    | .                  | .       | intergenic | -0.091 | rs786213351   | 2 |
| AAAC.GTTT    | 8 | 123291652 | 123291670 | 4.75    | .                  | .       | intergenic | 0.152  | 397161 rs7881 | 2 |
| AAAAC.GTTTT  | 8 | 123343616 | 123343634 | 3.8     | .                  | .       | intergenic | .      | rs790067518   | 3 |
| AAAAT.ATTTT  | 8 | 123347577 | 123347595 | 3.8     | .                  | .       | intergenic | 1.074  | rs792545743   | 2 |
| AAAC.GTTT    | 8 | 123475093 | 123475111 | 4.75    | .                  | .       | intergenic | 0.141  | rs787481693   | 2 |
| AT.AT        | 8 | 123528400 | 123528442 | 21.5    | .                  | .       | intergenic | 0.102  | .             | 4 |
| AAAC.GTTT    | 8 | 123551452 | 123551474 | 5.75    | .                  | .       | intergenic | -0.258 | rs788928491   | 2 |
| AG.CT        | 8 | 124052203 | 124052223 | 10.5    | ENSSSCT00000031175 | .       | intron     | .      | rs789490245   | 4 |
| AAAT.ATTT    | 8 | 124070011 | 124070022 | 3       | .                  | .       | intergenic | 0.266  | 377350 rs7884 | 2 |
| ATC.GAT      | 8 | 124120722 | 124120740 | 6.33333 | .                  | .       | intergenic | -0.28  | rs787939190   | 3 |
| AAAAT.ATTTT  | 8 | 124124156 | 124124172 | 3.4     | .                  | .       | intergenic | 0.225  | rs792455631   | 2 |
| AATG.CATT    | 8 | 124217764 | 124217782 | 4.75    | ENSSSCT00000030690 | .       | intron     | .      | rs791886914   | 2 |
| AAAC.GTTT    | 8 | 124345399 | 124345413 | 3.75    | ENSSSCT00000010025 | .       | intron     | 0.148  | 354906 rs7896 | 2 |
| AG.CT        | 8 | 124666422 | 124666434 | 6.5     | ENSSSCT00000010027 | .       | intron     | -0.1   | 321245 rs7907 | 2 |
| AG.CT        | 8 | 124730194 | 124730208 | 7.5     | .                  | .       | intergenic | 0.38   | 377409 rs7921 | 3 |
| AAAC.GTTT    | 8 | 124837581 | 124837604 | 6       | ENSSSCT00000030394 | PPA2    | intron     | -0.139 | rs791613162   | 2 |
| AC.GT        | 8 | 124903322 | 124903335 | 7       | ENSSSCT00000030394 | PPA2    | intron     | 0.167  | .             | 4 |
| AACCC.GGGTT  | 8 | 125134892 | 125134911 | 4       | ENSSSCT00000010028 | TET2    | intron     | 0.643  | rs792362005   | 2 |
| AAAC.GTTT    | 8 | 125280352 | 125280372 | 5.25    | .                  | .       | intergenic | -0.096 | rs791018284   | 3 |
| AAC.GTT      | 8 | 125503668 | 125503681 | 4.66667 | .                  | .       | intergenic | 0.016  | 770982 rs7902 | 4 |
| AAAT.ATTT    | 8 | 125846327 | 125846349 | 5.75    | .                  | .       | intergenic | .      | rs702742457   | 2 |
| AG.CT        | 8 | 126121715 | 126121725 | 5.5     | .                  | .       | intergenic | .      | rs787024596   | 2 |
| AT.AT        | 8 | 126147658 | 126147667 | 5       | .                  | .       | intergenic | .      | 746590 rs7882 | 2 |
| AAAT.ATTT    | 8 | 126212862 | 126212885 | 6       | .                  | .       | intergenic | .      | 183644 rs7900 | 2 |
| AC.GT        | 8 | 126246707 | 126246717 | 5.5     | .                  | .       | intergenic | -0.11  | .             | 2 |
| AC.GT        | 8 | 126310070 | 126310083 | 7       | .                  | .       | intergenic | 0.251  | 360950 rs7905 | 2 |
| AT.AT        | 8 | 126348520 | 126348531 | 6       | .                  | .       | intergenic | -0.062 | rs793680475   | 2 |
| AAT.ATT      | 8 | 126570966 | 126570979 | 4.66667 | .                  | .       | intergenic | 0.068  | rs792888887   | 2 |
| AAAT.ATTT    | 8 | 126681476 | 126681492 | 4.25    | .                  | .       | intergenic | .      | 732695 rs7905 | 2 |
| AAC.GTT      | 8 | 126705162 | 126705180 | 6.33333 | .                  | .       | intergenic | -0.09  | rs788751601   | 2 |
| AC.GT        | 8 | 126715239 | 126715264 | 13      | .                  | .       | intergenic | 0.245  | rs789896356   | 4 |
| AC.GT        | 8 | 126718451 | 126718462 | 6       | .                  | .       | intergenic | .      | rs790338014   | 4 |
| AAAC.GTTT    | 8 | 126731489 | 126731508 | 5       | .                  | .       | intergenic | 0.075  | rs789518099   | 2 |
| AAAC.GTTT    | 8 | 126734829 | 126734849 | 5.25    | .                  | .       | intergenic | 0.197  | 702238 rs7869 | 2 |
| AAC.GTT      | 8 | 127083514 | 127083525 | 4       | ENSSSCT00000010034 | .       | intron     | .      | .             | 2 |
| AG.CT        | 8 | 127366041 | 127366051 | 5.5     | ENSSSCT00000033438 | NFKB1   | intron     | .      | rs788752996   | 2 |
| AC.GT        | 8 | 127810579 | 127810595 | 8.5     | ENSSSCT00000010041 | SLC39A8 | intron     | -0.005 | rs792371269   | 2 |
| AAAG.CTTT    | 8 | 127815781 | 127815798 | 4.5     | ENSSSCT00000010041 | SLC39A8 | intron     | 0.35   | 307703 rs7911 | 2 |
| AC.GT        | 8 | 127838830 | 127838841 | 6       | .                  | .       | intergenic | 0.027  | rs697337693   | 2 |
| AG.CT        | 8 | 127843084 | 127843100 | 8.5     | .                  | .       | intergenic | 0.053  | rs788271575   | 2 |
| AC.GT        | 8 | 127897823 | 127897835 | 6.5     | .                  | .       | intergenic | .      | rs786365754   | 3 |
| AAAC.GTTT    | 8 | 128259871 | 128259900 | 7.5     | ENSSSCT00000010043 | .       | intron     | 0.129  | 788974 rs7924 | 2 |
| AAAAG.CTTTT  | 8 | 128275866 | 128275887 | 4.4     | ENSSSCT00000010043 | .       | intron     | 0.331  | rs789185882   | 2 |
| AC.GT        | 8 | 128313523 | 128313533 | 5.5     | ENSSSCT00000010043 | .       | intron     | .      | rs786460499   | 2 |
| AG.CT        | 8 | 128524306 | 128524321 | 8       | ENSSSCT00000010044 | PPP3CA  | intron     | 0.051  | .             | 4 |
| AAAAT.ATTTT  | 8 | 128598311 | 128598325 | 3       | ENSSSCT00000010044 | PPP3CA  | intron     | 0.2    | rs792197841   | 2 |
| AG.CT        | 8 | 128607977 | 128607987 | 5.5     | ENSSSCT00000010044 | PPP3CA  | intron     | -0.083 | .             | 4 |
| AAAAC.GTTTT  | 8 | 128638575 | 128638597 | 3.83333 | ENSSSCT00000010044 | PPP3CA  | intron     | -0.275 | rs789124095   | 2 |
| AAAAC.GTTTT  | 8 | 128842147 | 128842172 | 5.2     | .                  | .       | intergenic | .      | rs793412063   | 2 |
| AC.GT        | 8 | 128982957 | 128982969 | 6.5     | .                  | .       | intergenic | -0.044 | rs787556310   | 4 |
| AG.CT        | 8 | 129054173 | 129054185 | 6.5     | .                  | .       | intergenic | .      | 318737 rs7910 | 4 |
| AAAAC.GTTTT  | 8 | 129138121 | 129138139 | 3.8     | .                  | .       | intergenic | .      | rs792745686   | 2 |
| AT.AT        | 8 | 129213263 | 129213274 | 6       | .                  | .       | intergenic | -0.186 | rs792896547   | 3 |
| AG.CT        | 8 | 129223724 | 129223736 | 6.5     | .                  | .       | intergenic | -0.069 | 309494 rs7911 | 4 |
| AT.AT        | 8 | 129300405 | 129300414 | 5       | .                  | .       | intergenic | .      | rs791111340   | 2 |
| AAAC.GTTT    | 8 | 129501186 | 129501204 | 4.75    | .                  | .       | intergenic | 0.098  | rs791977224   | 2 |

|             |   |           |           |         |                    |        |            |        |               |   |
|-------------|---|-----------|-----------|---------|--------------------|--------|------------|--------|---------------|---|
| AAAAT.ATTTT | 8 | 129573492 | 129573514 | 4.6     | .                  | .      | intergenic | 0.243  | 784192 rs7903 | 2 |
| AAAAG.CTTTT | 8 | 129728627 | 129728647 | 4.2     | .                  | .      | intergenic | .      | rs786226896   | 3 |
| AATC.GATT   | 8 | 129742305 | 129742325 | 5.25    | ENSSSCT00000010051 | H2AFZ  | promoter   | 0.163  | rs786565737   | 2 |
| AAAG.CTTT   | 8 | 130071388 | 130071400 | 3.25    | ENSSSCT00000010052 | .      | intron     | 0.128  | .             | 2 |
| AAAG.CTTT   | 8 | 130122592 | 130122618 | 6.75    | ENSSSCT00000010053 | .      | intron     | .      | 590964 rs7911 | 2 |
| AG.CT       | 8 | 130425448 | 130425467 | 10      | ENSSSCT00000027188 | ADH4   | intron     | .      | rs792145086   | 2 |
| AG.CT       | 8 | 130425448 | 130425467 | 10      | ENSSSCT00000010057 | ADH4   | intron     | .      | rs792145086   | 2 |
| AAAG.CTTT   | 8 | 130481122 | 130481144 | 5.75    | ENSSSCT00000010059 | METAP1 | intron     | 2.43   | rs791881328   | 2 |
| AC.GT       | 8 | 130598786 | 130598798 | 6.5     | ENSSSCT00000032198 | EIF4E  | intron     | 0.241  | rs790624688   | 2 |
| AAAC.GTTT   | 8 | 130661440 | 130661481 | 10.5    | .                  | .      | intergenic | 0.111  | 539036 rs7869 | 2 |
| AAAC.GTTT   | 8 | 130713399 | 130713417 | 4.75    | .                  | .      | intergenic | .      | .             | 2 |
| AAAC.GTTT   | 8 | 130796855 | 130796875 | 5.25    | .                  | .      | intergenic | .      | 200065 rs7882 | 2 |
| AT.AT       | 8 | 130811814 | 130811831 | 9       | .                  | .      | intergenic | -0.056 | 522110 rs7887 | 2 |
| AAC.GTT     | 8 | 131119582 | 131119598 | 5.66667 | .                  | .      | intergenic | .      | rs786900454   | 3 |
| AC.GT       | 8 | 131229768 | 131229793 | 13      | .                  | .      | intergenic | .      | rs693393275   | 2 |
| AAAC.GTTT   | 8 | 131246100 | 131246127 | 7       | .                  | .      | intergenic | 0.234  | rs793021392   | 2 |
| AAAAC.GTTTT | 8 | 131319057 | 131319080 | 4       | .                  | .      | intergenic | 0.396  | rs789776801   | 2 |
| AC.GT       | 8 | 131453819 | 131453829 | 5.5     | .                  | .      | intergenic | 0.205  | .             | 2 |
| AAAC.GTTT   | 8 | 131545816 | 131545834 | 4.75    | .                  | .      | intergenic | 0.125  | 357029 rs7876 | 2 |
| AC.GT       | 8 | 131632835 | 131632847 | 6.5     | .                  | .      | intergenic | .      | rs791754492   | 2 |
| AAAAC.GTTTT | 8 | 131677428 | 131677448 | 4.2     | .                  | .      | intergenic | 0.345  | 562512 rs7894 | 2 |
| AT.AT       | 8 | 131782234 | 131782243 | 5       | .                  | .      | intergenic | 0.073  | rs791079084   | 2 |
| AT.AT       | 8 | 131868194 | 131868217 | 12      | .                  | .      | intergenic | 0.388  | 108596 rs7879 | 2 |
| AAAAC.GTTTT | 8 | 131874434 | 131874459 | 4.33333 | .                  | .      | intergenic | -0.214 | rs788152396   | 2 |
| AAAT.ATTT   | 8 | 132070588 | 132070602 | 3.75    | .                  | .      | intergenic | .      | 52424 rs7879  | 2 |
| AG.CT       | 8 | 132110619 | 132110641 | 11.5    | .                  | .      | intergenic | -0.045 | 353624 rs7043 | 2 |
| AT.AT       | 8 | 132432111 | 132432121 | 5.5     | .                  | .      | intergenic | 0.004  | .             | 3 |
| AG.CT       | 8 | 132446599 | 132446609 | 5.5     | .                  | .      | intergenic | -0.023 | .             | 3 |
| AC.GT       | 8 | 132450737 | 132450756 | 10      | .                  | .      | intergenic | 0.074  | rs792078813   | 2 |
| AC.GT       | 8 | 132456993 | 132457031 | 19.5    | .                  | .      | intergenic | -0.11  | rs789089957   | 4 |
| AG.CT       | 8 | 132470931 | 132470944 | 7       | .                  | .      | intergenic | 0.039  | rs792143943   | 2 |
| AG.CT       | 8 | 132500016 | 132500025 | 5       | .                  | .      | intergenic | -0.045 | .             | 2 |
| AAAAG.CTTTT | 8 | 132617127 | 132617155 | 4.83333 | .                  | .      | intergenic | -0.131 | rs791688841   | 2 |
| AAAAT.ATTTT | 8 | 132688251 | 132688279 | 4.83333 | .                  | .      | intergenic | -0.128 | rs789382846   | 2 |
| AT.AT       | 8 | 132714990 | 132714999 | 5       | .                  | .      | intergenic | 0.281  | rs791751981   | 2 |
| AAAAC.GTTTT | 8 | 132760578 | 132760601 | 4.8     | .                  | .      | intergenic | 0.149  | rs791804922   | 2 |
| AAAAC.GTTTT | 8 | 132764073 | 132764100 | 4.66667 | .                  | .      | intergenic | 0.091  | 172418 rs7869 | 2 |
| AC.GT       | 8 | 132792621 | 132792634 | 7       | .                  | .      | intergenic | -0.064 | rs787898179   | 2 |
| AAC.GTT     | 8 | 132962596 | 132962619 | 8       | .                  | .      | intergenic | 0.167  | rs792150334   | 2 |
| AG.CT       | 8 | 133076000 | 133076009 | 5       | .                  | .      | intergenic | -0.235 | rs787275305   | 2 |
| AC.GT       | 8 | 133162502 | 133162525 | 12      | .                  | .      | intergenic | -0.1   | rs790660216   | 2 |
| AAAAC.GTTTT | 8 | 133354566 | 133354584 | 3.8     | .                  | .      | intergenic | 0.753  | rs788876985   | 2 |
| AG.CT       | 8 | 133391378 | 133391388 | 5.5     | .                  | .      | intergenic | 0.156  | rs786740838   | 3 |
| AAAT.ATTT   | 8 | 133441078 | 133441100 | 5.75    | .                  | .      | intergenic | 0.02   | rs786254344   | 2 |
| AC.GT       | 8 | 133584492 | 133584504 | 6.5     | .                  | .      | intergenic | -0.034 | rs789863045   | 3 |
| AAATT.AATTT | 8 | 133691017 | 133691031 | 3       | .                  | .      | intergenic | 0.054  | rs790101000   | 2 |
| AAAC.GTTT   | 8 | 133758675 | 133758693 | 4.75    | ENSSSCT00000028459 | BMPR1B | intron     | .      | rs793860508   | 2 |
| AAC.GTT     | 8 | 133903189 | 133903205 | 5.66667 | ENSSSCT00000034827 | BMPR1B | intron     | 0.145  | 310831 rs7884 | 2 |
| AC.GT       | 8 | 133931299 | 133931311 | 6.5     | ENSSSCT00000034827 | BMPR1B | intron     | 0.213  | rs788421242   | 2 |
| AAAC.GTTT   | 8 | 133939986 | 133940000 | 3.75    | ENSSSCT00000034827 | BMPR1B | intron     | 0.044  | 101528 rs7871 | 2 |
| AC.GT       | 8 | 133954187 | 133954196 | 5       | ENSSSCT00000034827 | BMPR1B | intron     | .      | rs792437659   | 3 |
| AAAAC.GTTTT | 8 | 134018015 | 134018034 | 4       | ENSSSCT00000034827 | BMPR1B | intron     | .      | 126428 rs7913 | 2 |
| AT.AT       | 8 | 134067146 | 134067157 | 6       | .                  | .      | intergenic | .      | rs790106764   | 2 |
| AT.AT       | 8 | 134207714 | 134207728 | 7.5     | .                  | .      | intergenic | -0.092 | .             | 2 |
| AATC.GATT   | 8 | 134217312 | 134217336 | 6.25    | .                  | .      | intergenic | .      | rs790442598   | 2 |
| AC.GT       | 8 | 134247603 | 134247621 | 9.5     | .                  | .      | intergenic | 0.085  | .             | 2 |
| AAAG.CTTT   | 8 | 134276075 | 134276094 | 5       | .                  | .      | intergenic | 0.227  | rs790543115   | 2 |
| AAT.ATT     | 8 | 134292660 | 134292676 | 5.66667 | .                  | .      | intergenic | 0.133  | rs787929999   | 2 |
| AG.CT       | 8 | 134303322 | 134303334 | 6.5     | .                  | .      | intergenic | 0.224  | .             | 2 |
| AT.AT       | 8 | 134538343 | 134538357 | 7.5     | ENSSSCT00000010065 | PDLIM5 | intron     | 0.239  | .             | 2 |
| AG.CT       | 8 | 134620761 | 134620773 | 6.5     | .                  | .      | intergenic | 0.111  | 582613 rs7917 | 2 |
| AAAAT.ATTTT | 8 | 134630687 | 134630716 | 6       | .                  | .      | intergenic | -0.002 | 379802 rs7875 | 2 |
| AAAAC.GTTTT | 8 | 134818232 | 134818288 | 11.4    | .                  | .      | intergenic | .      | rs790587863   | 2 |
| AT.AT       | 8 | 134890000 | 134890019 | 10      | .                  | .      | intergenic | .      | rs792751099   | 2 |
| AAAC.GTTT   | 8 | 134947581 | 134947600 | 5       | .                  | .      | intergenic | .      | 521052 rs7872 | 2 |
| AAACC.GGTTT | 8 | 134973938 | 134973966 | 5.8     | .                  | .      | intergenic | .      | rs789009715   | 2 |
| AGATG.CATCT | 8 | 135091352 | 135091373 | 4.4     | .                  | .      | intergenic | 0.101  | 710285 rs7870 | 2 |
| AAAT.ATTT   | 8 | 135117191 | 135117212 | 5.5     | .                  | .      | intergenic | .      | 551254 rs7924 | 2 |
| AAC.GTT     | 8 | 135335551 | 135335564 | 4.66667 | .                  | .      | intergenic | -0.288 | rs789754043   | 2 |
| AAC.GTT     | 8 | 135360267 | 135360282 | 5.33333 | .                  | .      | intergenic | 0.157  | rs790472910   | 2 |
| AAC.GTT     | 8 | 135448936 | 135448955 | 6.66667 | ENSSSCT00000026735 | .      | intron     | 0.152  | rs790778411   | 2 |
| AAAC.GTTT   | 8 | 135494828 | 135494842 | 3.75    | ENSSSCT00000026735 | .      | intron     | 0.13   | rs791663669   | 2 |
| ACC.GGT     | 8 | 135506899 | 135506912 | 4.66667 | ENSSSCT00000026735 | .      | intron     | -0.158 | rs789642818   | 2 |
| AAAC.GTTT   | 8 | 135523424 | 135523449 | 6.5     | ENSSSCT00000026735 | .      | intron     | .      | rs792473506   | 2 |
| AAAAC.GTTTT | 8 | 135526749 | 135526768 | 4       | ENSSSCT00000026735 | .      | intron     | 0.452  | 318035 rs7890 | 2 |
| AAAT.ATTT   | 8 | 135620968 | 135620984 | 4.25    | .                  | .      | intergenic | 0.25   | rs787594597   | 3 |
| AAAT.ATTT   | 8 | 135639602 | 135639623 | 5.5     | .                  | .      | intergenic | -0.113 | rs788492847   | 2 |
| AAAT.ATTT   | 8 | 135732106 | 135732119 | 3.5     | .                  | .      | intergenic | -0.005 | rs787347740   | 2 |
| AAAT.ATTT   | 8 | 136000258 | 136000271 | 3.5     | .                  | .      | intergenic | -0.062 | 527060 rs7867 | 2 |
| AAAC.GTTT   | 8 | 136079092 | 136079107 | 4       | .                  | .      | intergenic | .      | rs790191226   | 2 |
| ACAT.ATGT   | 8 | 136143443 | 136143461 | 4.75    | .                  | .      | intergenic | -0.128 | rs788406326   | 2 |
| AC.GT       | 8 | 136145749 | 136145761 | 6.5     | .                  | .      | intergenic | .      | .             | 2 |
| AAAT.ATTT   | 8 | 136232640 | 136232663 | 6       | .                  | .      | intergenic | .      | .             | 2 |
| AT.AT       | 8 | 136247433 | 136247443 | 5.5     | .                  | .      | intergenic | -0.02  | .             | 2 |

|             |   |           |           |         |                    |          |            |        |        |                |   |
|-------------|---|-----------|-----------|---------|--------------------|----------|------------|--------|--------|----------------|---|
| AAG.CTT     | 8 | 136326450 | 136326464 | 5       | .                  | .        | intergenic | 0.013  | 736773 | rs7867         | 2 |
| AAAC.GTTT   | 8 | 136401759 | 136401779 | 5.25    | .                  | .        | intergenic | 0.389  |        | rs789874095    | 2 |
| AT.AT       | 8 | 136880133 | 136880143 | 5.5     | .                  | .        | intergenic | .      | 761360 | rs7886         | 2 |
| AAAG.CTTT   | 8 | 136987542 | 136987555 | 3.5     | .                  | .        | intergenic | .      | 330422 | rs7059         | 2 |
| AAAT.ATTT   | 8 | 137040327 | 137040341 | 3.75    | .                  | .        | intergenic | -0.052 | 272497 | rs7890         | 2 |
| AAAC.GTTT   | 8 | 137278190 | 137278208 | 4.75    | .                  | .        | intergenic | 0.447  | 319299 | rs7899         | 2 |
| AC.GT       | 8 | 137450795 | 137450811 | 8.5     | .                  | .        | intergenic | -0.107 | .      | .              | 2 |
| ATC.GAT     | 8 | 137468176 | 137468193 | 6       | .                  | .        | intergenic | .      |        | rs787774716    | 2 |
| AAAAC.GTTTT | 8 | 137479958 | 137479980 | 4.6     | .                  | .        | intergenic | -0.017 | 315499 | rs7899         | 2 |
| AC.GT       | 8 | 137480758 | 137480768 | 5.5     | .                  | .        | intergenic | 0.027  | .      | .              | 2 |
| AAAT.ATTT   | 8 | 137666567 | 137666593 | 6.75    | ENSSSCT00000031781 | .        | intron     | -0.111 |        | rs790156220    | 2 |
| AC.GT       | 8 | 137667262 | 137667272 | 5.5     | ENSSSCT00000031781 | .        | intron     | 0.6    |        | rs788353302    | 3 |
| AAAC.GTTT   | 8 | 137723194 | 137723212 | 4.75    | ENSSSCT00000031781 | .        | intron     | 0.075  |        | rs696068555    | 2 |
| AG.CT       | 8 | 137759491 | 137759504 | 7       | .                  | .        | intergenic | 0.218  | 190472 | rs7927         | 2 |
| AC.GT       | 8 | 137840938 | 137840949 | 6       | .                  | .        | intergenic | 0.106  |        | rs792867535    | 4 |
| AAAC.GTTT   | 8 | 137856724 | 137856748 | 6.25    | .                  | .        | intergenic | 0.448  | 700994 | rs7886         | 2 |
| AAAT.ATTT   | 8 | 138227573 | 138227594 | 5.5     | .                  | .        | intergenic | .      |        | rs791692403    | 2 |
| AAAC.GTTT   | 8 | 138263949 | 138263966 | 4.5     | .                  | .        | intergenic | -0.129 | 384602 | rs7893         | 2 |
| ACAG.CTGT   | 8 | 138528956 | 138528970 | 3.75    | ENSSSCT00000010075 | MMRN1    | intron     | -0.011 | 302477 | rs7897         | 2 |
| AAT.ATT     | 8 | 138688062 | 138688077 | 5.33333 | ENSSSCT00000010077 | SNCA     | intron     | .      | 311642 | rs7926         | 2 |
| AG.CT       | 8 | 138862754 | 138862765 | 6       | .                  | .        | intergenic | 0.046  | .      | .              | 4 |
| AAAAT.ATTTT | 8 | 138926985 | 138927001 | 3.4     | .                  | .        | intergenic | 0.032  | 339728 | rs7869         | 2 |
| AAAGG.CCTTT | 8 | 139039117 | 139039133 | 3.4     | .                  | .        | intergenic | 0.084  |        | rs790292379    | 3 |
| AAAAC.GTTTT | 8 | 139070763 | 139070797 | 7       | ENSSSCT00000010079 | .        | promoter   | 0.209  |        | rs786915821    | 2 |
| AAAAC.GTTTT | 8 | 139091756 | 139091795 | 8       | .                  | .        | intergenic | .      |        | rs787720917    | 2 |
| AAAC.GTTT   | 8 | 139097517 | 139097538 | 5.5     | .                  | .        | intergenic | 0.083  |        | rs787445639    | 2 |
| AG.CT       | 8 | 139299019 | 139299028 | 5       | .                  | .        | intergenic | 0.115  | .      | .              | 2 |
| AC.GT       | 8 | 139322497 | 139322508 | 6       | .                  | .        | intergenic | 0.024  | 101563 | rs7904         | 3 |
| AC.GT       | 8 | 139488712 | 139488724 | 6.5     | .                  | .        | intergenic | -0.002 | 226237 | rs7896         | 2 |
| AC.GT       | 8 | 139494901 | 139494919 | 9.5     | .                  | .        | intergenic | 0.169  |        | rs793765403    | 3 |
| AAT.ATT     | 8 | 139551433 | 139551446 | 4.66667 | .                  | .        | intergenic | 0.054  | 341429 | rs7864         | 2 |
| AC.GT       | 8 | 139590204 | 139590215 | 6       | .                  | .        | intergenic | .      | 304352 | rs7923         | 2 |
| AAAAC.GTTTT | 8 | 139591565 | 139591592 | 5.6     | .                  | .        | intergenic | 0.05   | 329806 | rs7862         | 3 |
| AAT.ATT     | 8 | 139701408 | 139701430 | 7.66667 | ENSSSCT00000022397 | .        | intron     | 0.075  | 557547 | rs7904         | 2 |
| AAAC.GTTT   | 8 | 139851574 | 139851586 | 3.25    | ENSSSCT00000010082 | HERC3    | intron     | .      | 332493 | rs7892         | 2 |
| AAC.GTT     | 8 | 139900485 | 139900498 | 4.66667 | .                  | .        | intergenic | 0.212  |        | rs790109048    | 2 |
| AAC.GTT     | 8 | 140100877 | 140100903 | 9       | ENSSSCT00000036615 | ABCG2    | promoter   | .      | 375612 | rs7865         | 2 |
| AAC.GTT     | 8 | 140100877 | 140100903 | 9       | ENSSSCT00000036669 | ABCG2    | promoter   | .      | 375612 | rs7865         | 2 |
| AAG.CTT     | 8 | 140305320 | 140305333 | 4.66667 | .                  | .        | intergenic | 0.129  |        | rs786771185    | 2 |
| AACC.GGTT   | 8 | 140377642 | 140377653 | 3       | .                  | .        | intergenic | 0.324  |        | rs791114600    | 2 |
| AG.CT       | 8 | 140537628 | 140537639 | 6       | ENSSSCT00000010099 | DSPP     | intron     | -0.024 |        | rs790583342    | 2 |
| AG.CT       | 8 | 140547591 | 140547602 | 6       | .                  | .        | intergenic | .      | .      | .              | 2 |
| AAAC.GTTT   | 8 | 140607149 | 140607170 | 5.5     | ENSSSCT00000010101 | SPARCL1  | intron     | 0.231  |        | .              | 2 |
| AAC.GTT     | 8 | 140768798 | 140768825 | 9.33333 | ENSSSCT00000010104 | HSD17B13 | intron     | 0.491  |        | rs792080054    | 2 |
| AAAT.ATTT   | 8 | 141247647 | 141247665 | 4.75    | .                  | .        | intergenic | .      | .      | .              | 2 |
| AAAT.ATTT   | 8 | 141461072 | 141461097 | 6.5     | ENSSSCT00000029989 | PTPN13   | intron     | 0.221  |        | rs793781640    | 2 |
| AC.GT       | 8 | 141942458 | 141942467 | 5       | .                  | .        | intergenic | -0.014 |        | rs788147165    | 3 |
| AAC.GTT     | 8 | 142076573 | 142076597 | 8.33333 | ENSSSCT00000036195 | MAPK10   | intron     | 0.037  |        | rs789549521    | 4 |
| AAC.GTT     | 8 | 142076573 | 142076597 | 8.33333 | ENSSSCT00000033080 | MAPK10   | intron     | 0.037  |        | rs789549521    | 4 |
| AAC.GTT     | 8 | 142076573 | 142076597 | 8.33333 | ENSSSCT00000010107 | MAPK10   | intron     | 0.037  |        | rs789549521    | 4 |
| AAGG.CCTT   | 8 | 142167628 | 142167644 | 4.25    | ENSSSCT00000010108 | ARHGAP24 | intron     | -0.068 |        | rs787763054    | 2 |
| AC.GT       | 8 | 142235119 | 142235131 | 6.5     | ENSSSCT00000010108 | ARHGAP24 | intron     | -0.009 |        | rs75468 rs7925 | 2 |
| AAAT.ATTT   | 8 | 142476329 | 142476346 | 4.5     | ENSSSCT00000010108 | ARHGAP24 | intron     | .      |        | rs787028153    | 3 |
| AT.AT       | 8 | 142836952 | 142836961 | 5       | .                  | .        | intergenic | .      |        | rs791855715    | 2 |
| AAAAT.ATTTT | 8 | 142846620 | 142846638 | 3.8     | .                  | .        | intergenic | 0.158  |        | rs786365970    | 2 |
| AAG.CTT     | 8 | 143117909 | 143117924 | 5.33333 | .                  | .        | intergenic | .      | .      | .              | 3 |
| AAAT.ATTT   | 8 | 143173278 | 143173298 | 5.25    | .                  | .        | intergenic | 0.286  | .      | .              | 2 |
| AAC.GTT     | 8 | 143428066 | 143428083 | 6       | .                  | .        | intergenic | .      |        | rs788495553    | 2 |
| AC.GT       | 8 | 143498788 | 143498806 | 9.5     | ENSSSCT00000010110 | CDS1     | intron     | 0.059  |        | rs789107945    | 2 |
| AATG.CATT   | 8 | 143723466 | 143723491 | 6.5     | .                  | .        | intergenic | 0.25   |        | rs790159325    | 2 |
| AAAC.GTTT   | 8 | 143856601 | 143856619 | 4.75    | .                  | .        | intergenic | 0.555  | 322500 | rs7885         | 2 |
| AAAAC.GTTTT | 8 | 144045929 | 144045952 | 4.8     | .                  | .        | intergenic | 0.094  |        | rs793297366    | 2 |
| AAT.ATT     | 8 | 144051603 | 144051618 | 5.33333 | .                  | .        | intergenic | 0.015  |        | rs790785691    | 2 |
| AC.GT       | 8 | 144098427 | 144098437 | 5.5     | .                  | .        | intergenic | 0.647  | .      | .              | 2 |
| AAC.GTT     | 8 | 144144579 | 144144592 | 4.66667 | .                  | .        | intergenic | .      | 341935 | rs7889         | 2 |
| AAAT.ATTT   | 8 | 144182011 | 144182024 | 3.5     | .                  | .        | intergenic | 0.111  |        | rs704868975    | 2 |
| AT.AT       | 8 | 144591216 | 144591227 | 6       | ENSSSCT00000010121 | COPS4    | intron     | 0.321  | 774307 | rs7908         | 2 |
| ACAT.ATGT   | 8 | 144777080 | 144777093 | 3.5     | ENSSSCT00000010124 | SEC31A   | intron     | 0.25   |        | rs793165680    | 2 |
| AG.CT       | 8 | 145011346 | 145011358 | 6.5     | .                  | .        | intergenic | 0.065  |        | rs791082126    | 2 |
| AAAC.GTTT   | 8 | 145099808 | 145099830 | 5.75    | .                  | .        | intergenic | .      | 303142 | rs7883         | 2 |
| AAT.ATT     | 8 | 145142060 | 145142073 | 4.66667 | .                  | .        | intergenic | 0.057  | .      | .              | 2 |
| AC.GT       | 8 | 145182291 | 145182303 | 6.5     | .                  | .        | intergenic | .      | 781747 | rs7899         | 2 |
| AAAAT.ATTTT | 8 | 145482655 | 145482675 | 4.2     | .                  | .        | intergenic | 0.088  |        | rs788453808    | 2 |
| AAAC.GTTT   | 8 | 145484539 | 145484562 | 6       | .                  | .        | intergenic | 0.531  | 349092 | rs7891         | 2 |
| AT.AT       | 8 | 145794180 | 145794199 | 10      | .                  | .        | intergenic | 0.189  | 361014 | rs7926         | 2 |
| AG.CT       | 8 | 145928478 | 145928491 | 7       | .                  | .        | intergenic | 1.837  | .      | .              | 2 |
| AAAC.GTTT   | 8 | 145990266 | 145990284 | 4.75    | .                  | .        | intergenic | 0.13   |        | rs787390905    | 2 |
| AC.GT       | 8 | 146396283 | 146396299 | 8.5     | .                  | .        | intergenic | .      |        | rs786988531    | 4 |
| AAC.GTT     | 8 | 146426484 | 146426496 | 4.33333 | .                  | .        | intergenic | -0.16  | .      | .              | 2 |
| AAT.ATT     | 8 | 146732490 | 146732510 | 7       | .                  | .        | intergenic | 0.002  |        | rs789683448    | 3 |
| AT.AT       | 8 | 146817392 | 146817406 | 7.5     | ENSSSCT00000022547 | PRDM8    | intron     | .      | 324627 | rs7896         | 2 |
| AT.AT       | 8 | 146817392 | 146817406 | 7.5     | ENSSSCT00000010135 | PRDM8    | intron     | .      | 324627 | rs7896         | 2 |
| AAAT.ATTT   | 8 | 147023103 | 147023133 | 7.75    | .                  | .        | intergenic | 0.113  | 374334 | rs7906         | 2 |
| AC.GT       | 8 | 147306470 | 147306486 | 8.5     | .                  | .        | intergenic | 0.153  |        | rs787242962    | 2 |

|             |   |           |           |         |                    |         |            |        |                 |   |
|-------------|---|-----------|-----------|---------|--------------------|---------|------------|--------|-----------------|---|
| AC.GT       | 8 | 147371100 | 147371113 | 7       | .                  | .       | intergenic | 0.034  | rs791028159     | 5 |
| AT.AT       | 8 | 147395068 | 147395078 | 5.5     | .                  | .       | intergenic | .      | rs342026 rs7878 | 2 |
| AAC.GTT     | 8 | 147486895 | 147486914 | 6.66667 | .                  | .       | intergenic | .      | rs165691 rs7870 | 2 |
| AAAC.GTTT   | 8 | 147682821 | 147682845 | 6.25    | .                  | .       | intergenic | 0.216  | rs317046 rs7870 | 2 |
| AT.AT       | 8 | 147787496 | 147787514 | 9.5     | .                  | .       | intergenic | 0.138  | .               | 4 |
| AAAC.GTTT   | 8 | 147957689 | 147957704 | 4       | .                  | .       | intergenic | 0.266  | rs788337022     | 2 |
| AAAC.GTTT   | 8 | 148213382 | 148213400 | 4.75    | ENSSSCT00000010143 | CSN1S1  | intron     | -0.07  | rs790219149     | 2 |
| AAAAC.GTTTT | 9 | 300698    | 300716    | 3.8     | .                  | .       | intergenic | 0.32   | rs791291749     | 2 |
| AAAAG.CTTTT | 9 | 2317987   | 2318002   | 3.2     | ENSSSCT00000032189 | OVCH2   | intron     | 0.135  | rs791651133     | 2 |
| AC.GT       | 9 | 2547460   | 2547473   | 7       | .                  | .       | intergenic | -0.059 | rs158489 rs7866 | 2 |
| AAAC.GTTT   | 9 | 2740055   | 2740073   | 4.75    | ENSSSCT00000015949 | SYT9    | intron     | .      | rs791337645     | 2 |
| AC.GT       | 9 | 2809285   | 2809301   | 8.5     | ENSSSCT00000015949 | SYT9    | intron     | 0.282  | rs320079 rs6961 | 7 |
| AAAT.ATTT   | 9 | 2914966   | 2914980   | 3.75    | .                  | .       | intergenic | 0.13   | rs791215351     | 2 |
| AT.AT       | 9 | 2923026   | 2923041   | 8       | .                  | .       | intergenic | .      | rs789350881     | 3 |
| AC.GT       | 9 | 2933906   | 2933932   | 13.5    | .                  | .       | intergenic | 0.312  | rs33295 rs7871  | 2 |
| AAAT.ATTT   | 9 | 2954688   | 2954701   | 3.5     | .                  | .       | intergenic | .      | .               | 2 |
| AAAC.GTTT   | 9 | 3043984   | 3044001   | 4.5     | .                  | .       | intergenic | 0.376  | rs286201 rs7866 | 2 |
| AAC.GTT     | 9 | 3348271   | 3348282   | 4       | .                  | .       | intergenic | .      | rs392543 rs7922 | 2 |
| AC.GT       | 9 | 3453243   | 3453253   | 5.5     | .                  | .       | intergenic | .      | .               | 2 |
| AC.GT       | 9 | 4286814   | 4286823   | 5       | .                  | .       | intergenic | .      | .               | 3 |
| AAAC.GTTT   | 9 | 5344642   | 5344656   | 3.75    | .                  | .       | intergenic | .      | rs790277652     | 4 |
| AT.AT       | 9 | 5657795   | 5657805   | 5.5     | .                  | .       | intergenic | 0.007  | rs789974413     | 3 |
| AAAAC.GTTTT | 9 | 5674091   | 5674113   | 4.6     | .                  | .       | intergenic | -0.099 | rs317684 rs7892 | 2 |
| AATT.AATT   | 9 | 5921161   | 5921179   | 4.75    | .                  | .       | intergenic | .      | .               | 2 |
| AT.AT       | 9 | 5972417   | 5972427   | 5.5     | .                  | .       | intergenic | -0.009 | .               | 5 |
| ACAT.ATGT   | 9 | 6042573   | 6042595   | 5.75    | .                  | .       | intergenic | -0.074 | rs767949 rs7904 | 2 |
| AC.GT       | 9 | 6141694   | 6141706   | 6.5     | ENSSSCT00000016119 | TRIM68  | intron     | 0.391  | rs331730 rs7876 | 2 |
| AAAC.GTTT   | 9 | 6249758   | 6249774   | 4.25    | .                  | .       | intergenic | 0.049  | rs791993539     | 2 |
| AT.AT       | 9 | 6561161   | 6561174   | 7       | .                  | .       | intergenic | -0.519 | rs786726445     | 2 |
| AC.GT       | 9 | 6575896   | 6575914   | 9.5     | .                  | .       | intergenic | .      | .               | 2 |
| AG.CT       | 9 | 6795076   | 6795089   | 7       | .                  | .       | intergenic | .      | rs694452350     | 2 |
| AC.GT       | 9 | 6818212   | 6818221   | 5       | ENSSSCT00000016142 | .       | 3'utr      | 0.207  | rs788449837     | 3 |
| AAAAT.ATTTT | 9 | 6915060   | 6915081   | 4.4     | ENSSSCT00000016143 | STIM1   | intron     | 0.481  | rs787365479     | 2 |
| AC.GT       | 9 | 7053879   | 7053890   | 6       | ENSSSCT00000016143 | STIM1   | intron     | 0.243  | rs793816607     | 2 |
| AC.GT       | 9 | 7065708   | 7065722   | 7.5     | .                  | .       | intergenic | 0.284  | rs793148982     | 2 |
| AC.GT       | 9 | 7124760   | 7124770   | 5.5     | ENSSSCT00000016145 | NUP98   | intron     | .      | rs791067197     | 2 |
| AT.AT       | 9 | 7144142   | 7144152   | 5.5     | ENSSSCT00000016145 | NUP98   | intron     | .      | rs788731116     | 3 |
| AAAGC.GCTTT | 9 | 7153308   | 7153323   | 3.2     | ENSSSCT00000016145 | NUP98   | intron     | -0.047 | rs789190428     | 2 |
| AAAT.ATTT   | 9 | 7157918   | 7157938   | 5.25    | ENSSSCT00000016145 | NUP98   | intron     | 0.3    | rs791994375     | 2 |
| AAAAC.GTTTT | 9 | 7269515   | 7269540   | 5.2     | .                  | .       | intergenic | .      | rs792111651     | 3 |
| AAGG.CCTT   | 9 | 8085892   | 8085922   | 7.75    | ENSSSCT00000016169 | STARD10 | intron     | 0.164  | rs791761170     | 2 |
| AAAC.GTTT   | 9 | 8264503   | 8264514   | 3       | ENSSSCT00000016171 | FCHSD2  | intron     | 0.345  | rs787321263     | 2 |
| AAAC.GTTT   | 9 | 8264503   | 8264514   | 3       | ENSSSCT00000016172 | FCHSD2  | intron     | 0.345  | rs787321263     | 2 |
| ACC.GGT     | 9 | 8308020   | 8308036   | 5.66667 | ENSSSCT00000016171 | FCHSD2  | intron     | .      | rs790120607     | 2 |
| ACC.GGT     | 9 | 8308020   | 8308036   | 5.66667 | ENSSSCT00000016172 | FCHSD2  | intron     | .      | rs790120607     | 2 |
| ACC.GGT     | 9 | 8308020   | 8308036   | 5.66667 | ENSSSCT00000020569 | U6      | promoter   | .      | rs790120607     | 2 |
| AT.AT       | 9 | 8655157   | 8655168   | 6       | ENSSSCT00000016174 | .       | intron     | 0.196  | rs789342938     | 2 |
| AC.GT       | 9 | 8743881   | 8743891   | 5.5     | .                  | .       | intergenic | 0.708  | .               | 2 |
| AAAC.GTTT   | 9 | 8774688   | 8774710   | 5.75    | .                  | .       | intergenic | 0.382  | rs787227863     | 2 |
| AAAAC.GTTTT | 9 | 8813701   | 8813716   | 3.2     | .                  | .       | intergenic | 0.262  | rs787154286     | 2 |
| AC.GT       | 9 | 9129489   | 9129505   | 8.5     | .                  | .       | intergenic | 0.129  | rs710761134     | 4 |
| AC.GT       | 9 | 9156131   | 9156143   | 6.5     | ENSSSCT00000016185 | UCP2    | promoter   | .      | rs380769 rs7912 | 4 |
| AAC.GTT     | 9 | 9514098   | 9514109   | 4       | .                  | .       | intergenic | .      | rs787153031     | 2 |
| AAAC.GTTT   | 9 | 9607579   | 9607597   | 4.75    | .                  | .       | intergenic | .      | rs787677659     | 2 |
| AAAAT.ATTTT | 9 | 9641780   | 9641803   | 4.8     | .                  | .       | intergenic | .      | rs234679 rs7891 | 2 |
| AC.GT       | 9 | 10777516  | 10777525  | 5       | .                  | .       | intergenic | -0.358 | rs789445648     | 2 |
| AC.GT       | 9 | 11086909  | 11086922  | 7       | ENSSSCT00000016213 | MAP6    | intron     | 0.097  | .               | 4 |
| AAC.GTT     | 9 | 11379554  | 11379567  | 4.66667 | ENSSSCT00000025652 | UVRAG   | intron     | -0.104 | rs789732243     | 4 |
| AAAGC.GCTTT | 9 | 11411967  | 11411992  | 5.2     | ENSSSCT00000025652 | UVRAG   | intron     | .      | rs788546334     | 2 |
| AG.CT       | 9 | 11656368  | 11656382  | 7.5     | ENSSSCT00000016218 | PRKRIR  | intron     | 0.142  | rs786947500     | 2 |
| AAAAC.GTTTT | 9 | 11845595  | 11845613  | 3.16667 | .                  | .       | intergenic | .      | rs393696 rs7925 | 2 |
| AC.GT       | 9 | 12248858  | 12248872  | 7.5     | ENSSSCT00000023312 | .       | intron     | .      | .               | 2 |
| AGAT.ATCT   | 9 | 12382919  | 12382951  | 8.25    | ENSSSCT00000016229 | MYO7A   | intron     | 0.046  | rs791257542     | 2 |
| AAAAT.ATTTT | 9 | 12624520  | 12624543  | 4       | ENSSSCT00000016230 | .       | intron     | .      | rs787307793     | 2 |
| AAT.ATT     | 9 | 12731506  | 12731533  | 9.33333 | ENSSSCT00000016231 | .       | intron     | .      | rs787882344     | 2 |
| AT.AT       | 9 | 12848247  | 12848256  | 5       | .                  | .       | intergenic | .      | rs691967153     | 2 |
| AAAC.GTTT   | 9 | 12963737  | 12963762  | 6.5     | .                  | .       | intergenic | .      | rs792029980     | 2 |
| AAC.GTT     | 9 | 13394131  | 13394145  | 5       | .                  | .       | intergenic | 0.127  | .               | 2 |
| ACT.AGT     | 9 | 13846859  | 13846872  | 4.66667 | .                  | .       | intergenic | 0.217  | .               | 2 |
| AAAG.CTTT   | 9 | 14039798  | 14039824  | 6.75    | ENSSSCT00000016246 | GAB2    | intron     | .      | rs787535301     | 2 |
| AC.GT       | 9 | 14074989  | 14075000  | 6       | ENSSSCT00000016246 | GAB2    | intron     | 0.14   | rs792638897     | 3 |
| AAC.GTT     | 9 | 14106368  | 14106381  | 4.66667 | ENSSSCT00000016246 | GAB2    | intron     | .      | rs375109 rs7880 | 2 |
| AT.AT       | 9 | 14109433  | 14109461  | 14.5    | ENSSSCT00000016246 | GAB2    | intron     | .      | rs303613 rs7892 | 2 |
| AT.AT       | 9 | 14167652  | 14167662  | 5.5     | ENSSSCT00000016248 | NARS2   | intron     | .      | rs792842559     | 2 |
| AC.GT       | 9 | 14462973  | 14462986  | 7       | ENSSSCT00000016249 | .       | intron     | 0.093  | rs790457535     | 2 |
| AAAC.GTTT   | 9 | 14476013  | 14476027  | 3.75    | ENSSSCT00000016249 | .       | intron     | .      | rs738849 rs7908 | 2 |
| AC.GT       | 9 | 14910807  | 14910817  | 5.5     | .                  | .       | intergenic | 0.094  | rs708830826     | 2 |
| AG.CT       | 9 | 15054050  | 15054063  | 7       | .                  | .       | intergenic | 0.347  | rs137703 rs7900 | 2 |
| AG.CT       | 9 | 15367511  | 15367524  | 7       | .                  | .       | intergenic | -0.001 | rs362535 rs7903 | 2 |
| AAAC.GTTT   | 9 | 15372465  | 15372479  | 3.75    | .                  | .       | intergenic | -0.097 | .               | 2 |
| AC.GT       | 9 | 15645702  | 15645722  | 10.5    | .                  | .       | intergenic | -0.1   | rs793264184     | 2 |
| AAAG.CTTT   | 9 | 15679706  | 15679719  | 3.5     | .                  | .       | intergenic | -0.104 | .               | 2 |
| AAC.GTT     | 9 | 15897197  | 15897213  | 5.66667 | .                  | .       | intergenic | .      | rs326474 rs7877 | 4 |
| AC.GT       | 9 | 15942921  | 15942941  | 10.5    | .                  | .       | intergenic | -0.046 | rs789973187     | 3 |

|               |   |          |          |         |                    |          |            |        |               |   |
|---------------|---|----------|----------|---------|--------------------|----------|------------|--------|---------------|---|
| AAC.GTT       | 9 | 16100769 | 16100790 | 7.33333 | .                  | .        | intergenic | -0.145 | rs791597400   | 2 |
| AAAAC.GTTTT   | 9 | 16179071 | 16179094 | 4.8     | .                  | .        | intergenic | 0.574  | rs788872213   | 2 |
| AAAAT.ATTTT   | 9 | 16414481 | 16414500 | 4       | .                  | .        | intergenic | .      | rs791366873   | 2 |
| AAAC.GTTT     | 9 | 16519206 | 16519233 | 7       | .                  | .        | intergenic | 0.323  | 360124 rs6907 | 2 |
| AAAC.GTTT     | 9 | 16581117 | 16581140 | 6       | .                  | .        | intergenic | 0.514  | rs793321828   | 2 |
| AAAC.GTTT     | 9 | 16774642 | 16774654 | 3.25    | .                  | .        | intergenic | -0.005 | 353973 rs7927 | 2 |
| AAAC.GTTT     | 9 | 16841095 | 16841121 | 6.75    | .                  | .        | intergenic | 0.031  | rs790897883   | 2 |
| AATT.AATT     | 9 | 16871993 | 16872009 | 4.25    | .                  | .        | intergenic | -0.114 | rs791299309   | 2 |
| AT.AT         | 9 | 16891732 | 16891743 | 6       | .                  | .        | intergenic | -0.148 | rs793745863   | 3 |
| AG.CT         | 9 | 16965862 | 16965887 | 13      | .                  | .        | intergenic | -0.343 | rs789033905   | 4 |
| AAAT.ATTT     | 9 | 16977593 | 16977611 | 4.75    | .                  | .        | intergenic | .      | .             | 3 |
| AAAAT.ATTTT   | 9 | 17041154 | 17041184 | 6.2     | .                  | .        | intergenic | .      | 326955 rs7922 | 2 |
| AC.GT         | 9 | 17197722 | 17197740 | 9.5     | .                  | .        | intergenic | -0.078 | 130228 rs7936 | 2 |
| AAAC.GTTT     | 9 | 17224074 | 17224097 | 6       | .                  | .        | intergenic | 0.137  | rs788934179   | 2 |
| AC.GT         | 9 | 17233545 | 17233572 | 14      | .                  | .        | intergenic | -0.077 | rs789321240   | 2 |
| AT.AT         | 9 | 17254194 | 17254204 | 5.5     | .                  | .        | intergenic | -0.105 | 368790 rs7892 | 2 |
| AAAAC.GTTTT   | 9 | 17317134 | 17317151 | 3.6     | .                  | .        | intergenic | .      | rs788861149   | 2 |
| AC.GT         | 9 | 17345180 | 17345191 | 6       | .                  | .        | intergenic | .      | 366574 rs7937 | 2 |
| AAAAAC.GTTTTT | 9 | 17420122 | 17420143 | 3.66667 | .                  | .        | intergenic | .      | rs791810169   | 2 |
| AAG.CTT       | 9 | 17442721 | 17442748 | 9.33333 | .                  | .        | intergenic | 1.001  | rs791360309   | 2 |
| AAT.ATT       | 9 | 17453106 | 17453125 | 6.66667 | .                  | .        | intergenic | 0.731  | rs792876857   | 2 |
| AT.AT         | 9 | 17760784 | 17760794 | 5.5     | .                  | .        | intergenic | 0.058  | rs787117180   | 3 |
| AC.GT         | 9 | 17800933 | 17800964 | 16      | .                  | .        | intergenic | 0.085  | rs789412245   | 2 |
| AT.AT         | 9 | 17912458 | 17912471 | 7       | .                  | .        | intergenic | .      | rs792196535   | 2 |
| AAT.ATT       | 9 | 17974204 | 17974215 | 4       | .                  | .        | intergenic | 0.106  | .             | 2 |
| AT.AT         | 9 | 18053116 | 18053131 | 8       | .                  | .        | intergenic | 0.013  | .             | 2 |
| AGAT.ATCT     | 9 | 18071795 | 18071806 | 3       | .                  | .        | intergenic | 0.08   | rs787075615   | 2 |
| AAT.ATT       | 9 | 18086626 | 18086655 | 10      | .                  | .        | intergenic | 0.101  | 774988 rs7902 | 2 |
| ACAG.CTGT     | 9 | 18535514 | 18535527 | 3.5     | .                  | .        | intergenic | 0.078  | rs786603253   | 3 |
| AC.GT         | 9 | 18652858 | 18652867 | 5       | .                  | .        | intergenic | 0.081  | .             | 2 |
| AAAT.ATTT     | 9 | 18794021 | 18794043 | 5.75    | .                  | .        | intergenic | .      | rs793788192   | 2 |
| AG.CT         | 9 | 18891430 | 18891440 | 5.5     | ENSSSCT00000016253 | C11orf82 | intron     | 0.223  | 313607 rs7900 | 2 |
| AC.GT         | 9 | 19055311 | 19055325 | 7.5     | .                  | .        | intergenic | 0.202  | 130434 rs7902 | 2 |
| AAATAT.ATATTI | 9 | 19173757 | 19173775 | 3.16667 | .                  | .        | intergenic | 0.446  | rs789925290   | 2 |
| AC.GT         | 9 | 19352645 | 19352655 | 5.5     | ENSSSCT00000016258 | CCDC90B  | intron     | .      | .             | 2 |
| AAT.ATT       | 9 | 19353649 | 19353663 | 5       | ENSSSCT00000016258 | CCDC90B  | intron     | .      | rs787176367   | 2 |
| AAAT.ATTT     | 9 | 19987927 | 19987947 | 5.25    | .                  | .        | intergenic | .      | rs792095226   | 2 |
| AC.GT         | 9 | 20004158 | 20004177 | 10      | .                  | .        | intergenic | 0.083  | rs788213430   | 3 |
| AC.GT         | 9 | 20385667 | 20385676 | 5       | .                  | .        | intergenic | 0.056  | .             | 3 |
| AAT.ATT       | 9 | 20497885 | 20497896 | 4       | .                  | .        | intergenic | 0.014  | rs787111691   | 2 |
| AT.AT         | 9 | 20578802 | 20578814 | 6.5     | .                  | .        | intergenic | .      | 369630 rs7885 | 2 |
| AC.GT         | 9 | 20598449 | 20598464 | 8       | .                  | .        | intergenic | .      | .             | 3 |
| AGG.CCT       | 9 | 20616601 | 20616619 | 6.33333 | .                  | .        | intergenic | 0.041  | rs791435816   | 2 |
| AT.AT         | 9 | 20790986 | 20790995 | 5       | .                  | .        | intergenic | .      | rs787576344   | 2 |
| AAAG.CTTT     | 9 | 20794357 | 20794370 | 3.5     | .                  | .        | intergenic | -0.053 | .             | 2 |
| AG.CT         | 9 | 20957929 | 20957940 | 6       | .                  | .        | intergenic | -0.013 | .             | 2 |
| AAAC.GTTT     | 9 | 20972178 | 20972196 | 4.75    | .                  | .        | intergenic | 0.304  | rs789229351   | 2 |
| AG.CT         | 9 | 21062424 | 21062434 | 5.5     | .                  | .        | intergenic | 0.627  | .             | 4 |
| AC.GT         | 9 | 21311578 | 21311588 | 5.5     | .                  | .        | intergenic | 0.272  | rs786683405   | 2 |
| AG.CT         | 9 | 21554830 | 21554839 | 5       | .                  | .        | intergenic | .      | .             | 2 |
| AAAC.GTTT     | 9 | 21811940 | 21811953 | 3.5     | .                  | .        | intergenic | 0.387  | 398396 rs7875 | 2 |
| AAC.GTT       | 9 | 21879793 | 21879807 | 5       | ENSSSCT00000016264 | CCDC89   | promoter   | 0.192  | rs792012926   | 2 |
| AAAC.GTTT     | 9 | 21975380 | 21975406 | 6.75    | ENSSSCT00000016265 | SYTL2    | intron     | -0.01  | rs787418326   | 2 |
| AAC.GTT       | 9 | 22117538 | 22117554 | 5.66667 | ENSSSCT00000016269 | .        | intron     | 0.6    | .             | 2 |
| AT.AT         | 9 | 22204434 | 22204443 | 5       | .                  | .        | intergenic | 0.027  | .             | 2 |
| AAAC.GTTT     | 9 | 22314175 | 22314200 | 6.5     | .                  | .        | intergenic | 0.114  | rs786210390   | 2 |
| AAAT.ATTT     | 9 | 22358142 | 22358163 | 5.5     | ENSSSCT00000030954 | .        | intron     | 0.369  | rs788355596   | 2 |
| AATG.CATT     | 9 | 22708034 | 22708054 | 5.25    | .                  | .        | intergenic | 0.071  | rs791267428   | 2 |
| AC.GT         | 9 | 23121517 | 23121529 | 6.5     | ENSSSCT00000028393 | .        | intron     | .      | rs789296000   | 2 |
| AC.GT         | 9 | 23315753 | 23315773 | 10.5    | .                  | .        | intergenic | 0.336  | 390084 rs7898 | 2 |
| AAAT.ATTT     | 9 | 23584999 | 23585025 | 6.75    | .                  | .        | intergenic | .      | rs789112954   | 2 |
| AAAAG.CTTTT   | 9 | 23829317 | 23829341 | 5       | ENSSSCT00000016279 | RAB38    | intron     | 0.072  | 334696 rs7863 | 2 |
| AGC.GCT       | 9 | 23924122 | 23924138 | 5.66667 | .                  | .        | intergenic | -0.009 | 303036 rs7902 | 2 |
| AAAC.GTTT     | 9 | 24194356 | 24194378 | 5.75    | .                  | .        | intergenic | -0.002 | rs793871109   | 2 |
| AG.CT         | 9 | 24332048 | 24332062 | 7.5     | ENSSSCT00000027396 | .        | intron     | 0.049  | rs793727508   | 2 |
| AAAAC.GTTTT   | 9 | 24470844 | 24470873 | 6       | ENSSSCT00000016281 | .        | intron     | .      | 394195 rs7889 | 2 |
| AAAT.ATTT     | 9 | 24494387 | 24494402 | 4       | ENSSSCT00000016281 | .        | intron     | .      | 112578 rs7937 | 2 |
| AT.AT         | 9 | 24856785 | 24856806 | 11      | .                  | .        | intergenic | 0.97   | 388239 rs7868 | 2 |
| AAT.ATT       | 9 | 25242353 | 25242367 | 5       | ENSSSCT00000016284 | NOX4     | intron     | .      | rs789364117   | 2 |
| AT.AT         | 9 | 25508087 | 25508098 | 6       | .                  | .        | intergenic | 0.139  | rs788043567   | 3 |
| AAT.ATT       | 9 | 25684852 | 25684871 | 6.66667 | ENSSSCT00000024828 | FOLH1    | intron     | -0.178 | rs792162580   | 2 |
| AAC.GTT       | 9 | 25967453 | 25967469 | 5.66667 | .                  | .        | intergenic | 1.391  | rs787361056   | 2 |
| AAAAAC.GTTTTT | 9 | 26013910 | 26013932 | 3.83333 | .                  | .        | intergenic | .      | rs793144136   | 2 |
| AAAC.GTTT     | 9 | 26037758 | 26037781 | 6       | .                  | .        | intergenic | .      | 381703 rs7920 | 3 |
| AAAC.GTTT     | 9 | 26074035 | 26074056 | 5.5     | .                  | .        | intergenic | 0.243  | 373725 rs7922 | 2 |
| AAG.CTT       | 9 | 26139168 | 26139190 | 7.66667 | .                  | .        | intergenic | 0.142  | rs791226822   | 2 |
| AG.CT         | 9 | 26144544 | 26144555 | 6       | .                  | .        | intergenic | .      | rs791723340   | 2 |
| AAAC.GTTT     | 9 | 26179547 | 26179563 | 4.25    | .                  | .        | intergenic | 0.14   | 160744 rs7874 | 2 |
| AAGAG.CTCTT   | 9 | 26210481 | 26210510 | 6       | .                  | .        | intergenic | 0.021  | 300759 rs7879 | 2 |
| AC.GT         | 9 | 26449223 | 26449257 | 17.5    | .                  | .        | intergenic | -0.071 | 111179 rs7005 | 2 |
| AAT.ATT       | 9 | 26917237 | 26917250 | 4.66667 | .                  | .        | intergenic | 0.033  | 710599 rs7924 | 2 |
| AC.GT         | 9 | 26954556 | 26954566 | 5.5     | .                  | .        | intergenic | .      | .             | 2 |
| AT.AT         | 9 | 26960612 | 26960623 | 6       | .                  | .        | intergenic | -0.172 | rs793287660   | 3 |
| AT.AT         | 9 | 27446775 | 27446784 | 5       | .                  | .        | intergenic | 0.127  | rs787330328   | 2 |

|              |   |          |          |         |                    |          |            |        |                 |   |
|--------------|---|----------|----------|---------|--------------------|----------|------------|--------|-----------------|---|
| AAAT.ATTT    | 9 | 27600543 | 27600564 | 5.5     | .                  | .        | intergenic | 0.348  | rs788232719     | 4 |
| AAAC.GTTT    | 9 | 28081753 | 28081777 | 6.25    | .                  | .        | intergenic | 0.194  | rs787032 rs7876 | 2 |
| AAAG.CTTT    | 9 | 28126273 | 28126289 | 4.25    | .                  | .        | intergenic | -0.037 | rs791504563     | 2 |
| AAAT.ATTT    | 9 | 28173043 | 28173059 | 4.25    | ENSSSCT00000016292 | FAT3     | intron     | .      | .               | 2 |
| AT.AT        | 9 | 28231737 | 28231769 | 16.5    | ENSSSCT00000016292 | FAT3     | intron     | 0.47   | rs697186427     | 2 |
| AG.CT        | 9 | 28287939 | 28287948 | 5       | ENSSSCT00000016292 | FAT3     | intron     | 0.265  | rs787201920     | 2 |
| AAAG.CTTT    | 9 | 28543496 | 28543511 | 4       | ENSSSCT00000016292 | FAT3     | intron     | 0.07   | rs791046313     | 2 |
| AC.GT        | 9 | 28589697 | 28589726 | 15      | ENSSSCT00000016292 | FAT3     | intron     | 0.037  | .               | 2 |
| AT.AT        | 9 | 28621062 | 28621073 | 6       | ENSSSCT00000016292 | FAT3     | intron     | 0.375  | rs787508368     | 4 |
| AAT.ATT      | 9 | 28691376 | 28691395 | 6.66667 | ENSSSCT00000016292 | FAT3     | intron     | -0.185 | 150614 rs7903   | 2 |
| AAC.GTT      | 9 | 28835976 | 28835999 | 8       | .                  | .        | intergenic | -0.2   | 356697 rs7900   | 2 |
| AC.GT        | 9 | 29516294 | 29516306 | 6.5     | .                  | .        | intergenic | 0.281  | 361977 rs7934   | 4 |
| AT.AT        | 9 | 29748599 | 29748609 | 5.5     | ENSSSCT00000016304 | KIAA1731 | intron     | .      | rs791659121     | 2 |
| AAT.ATT      | 9 | 29814619 | 29814642 | 8       | ENSSSCT00000016307 | C11orf54 | intron     | .      | rs787040952     | 2 |
| AG.CT        | 9 | 30573920 | 30573929 | 5       | .                  | .        | intergenic | 0.139  | 395434 rs7932   | 2 |
| AG.CT        | 9 | 30578801 | 30578812 | 6       | .                  | .        | intergenic | -0.125 | 147264 rs7921   | 2 |
| AAAC.GTTT    | 9 | 30788859 | 30788880 | 5.5     | ENSSSCT00000016322 | CWC15    | 3'utr      | -0.053 | rs792682550     | 2 |
| AT.AT        | 9 | 31132775 | 31132789 | 7.5     | .                  | .        | intergenic | 0.064  | 393613 rs7864   | 2 |
| AAAT.ATTT    | 9 | 31315984 | 31316007 | 6       | .                  | .        | intergenic | 0.621  | rs793308749     | 4 |
| AAAG.CTTT    | 9 | 31326747 | 31326758 | 3       | .                  | .        | intergenic | -0.056 | rs789915844     | 2 |
| AAAAAT.ATTTT | 9 | 31418484 | 31418501 | 3       | .                  | .        | intergenic | 0.11   | .               | 2 |
| AAAC.GTTT    | 9 | 31464012 | 31464030 | 4.75    | .                  | .        | intergenic | 0.267  | 378310 rs7938   | 2 |
| AT.AT        | 9 | 31684352 | 31684362 | 5.5     | .                  | .        | intergenic | -0.024 | .               | 3 |
| AAACC.GGTTT  | 9 | 31713641 | 31713671 | 6.2     | ENSSSCT00000016328 | FAM76B   | intron     | 0.046  | rs793452394     | 2 |
| AC.GT        | 9 | 31733711 | 31733725 | 7.5     | .                  | .        | intergenic | 0.152  | .               | 2 |
| AC.GT        | 9 | 31832001 | 31832011 | 5.5     | .                  | .        | intergenic | 0.111  | .               | 2 |
| AC.GT        | 9 | 31897034 | 31897044 | 5.5     | ENSSSCT00000016332 | MTMR2    | intron     | .      | .               | 3 |
| AGC.GCT      | 9 | 31932707 | 31932723 | 5.66667 | .                  | .        | intergenic | 0.067  | .               | 2 |
| AG.CT        | 9 | 32110505 | 32110517 | 6.5     | .                  | .        | intergenic | 0.311  | rs786831315     | 2 |
| AG.CT        | 9 | 32204333 | 32204342 | 5       | .                  | .        | intergenic | 0.745  | rs793874719     | 2 |
| AAAC.GTTT    | 9 | 32304442 | 32304465 | 6       | .                  | .        | intergenic | 0.123  | rs790671634     | 2 |
| AAAAC.GTTTT  | 9 | 32415772 | 32415794 | 4.6     | ENSSSCT00000016334 | CCDC82   | intron     | 0.077  | rs789526368     | 2 |
| AAC.GTT      | 9 | 32784395 | 32784411 | 5.66667 | .                  | .        | intergenic | .      | rs786381086     | 4 |
| AAGG.CCTT    | 9 | 32812607 | 32812630 | 6       | .                  | .        | intergenic | -0.159 | 397729 rs6973   | 2 |
| AC.GT        | 9 | 32893375 | 32893388 | 7       | .                  | .        | intergenic | -0.108 | rs791212794     | 2 |
| AC.GT        | 9 | 32918657 | 32918669 | 6.5     | .                  | .        | intergenic | -0.215 | 166524 rs7906   | 2 |
| AAAC.GTTT    | 9 | 32932318 | 32932339 | 5.5     | .                  | .        | intergenic | 0.119  | rs790349412     | 4 |
| AAAC.GTTT    | 9 | 32934107 | 32934126 | 5       | .                  | .        | intergenic | -0.042 | 359049 rs7133   | 4 |
| AT.AT        | 9 | 32982753 | 32982775 | 11.5    | .                  | .        | intergenic | .      | .               | 3 |
| AT.AT        | 9 | 32986429 | 32986439 | 5.5     | .                  | .        | intergenic | .      | .               | 3 |
| AAAC.GTTT    | 9 | 32990760 | 32990787 | 7       | .                  | .        | intergenic | -0.089 | 381455 rs7876   | 2 |
| AAAT.ATTT    | 9 | 33127317 | 33127332 | 4       | .                  | .        | intergenic | -0.039 | rs788109172     | 2 |
| AAAC.GTTT    | 9 | 33268160 | 33268171 | 3       | .                  | .        | intergenic | .      | rs792710642     | 2 |
| AAC.GTT      | 9 | 33711766 | 33711779 | 4.66667 | .                  | .        | intergenic | 0.376  | 381099 rs7879   | 2 |
| AAAC.GTTT    | 9 | 33765602 | 33765616 | 3.75    | .                  | .        | intergenic | -0.121 | rs786390217     | 2 |
| ACAT.ATGT    | 9 | 33851682 | 33851711 | 7.5     | .                  | .        | intergenic | .      | rs787797767     | 2 |
| AAAAG.CTTTT  | 9 | 33914344 | 33914360 | 3.4     | .                  | .        | intergenic | .      | .               | 2 |
| AC.GT        | 9 | 33946095 | 33946107 | 6.5     | .                  | .        | intergenic | .      | rs789751856     | 2 |
| AAAC.GTTT    | 9 | 33996883 | 33996905 | 5.75    | .                  | .        | intergenic | .      | rs787562307     | 2 |
| AAAAG.CTTTT  | 9 | 34206128 | 34206147 | 4       | .                  | .        | intergenic | .      | 773905 rs7872   | 2 |
| AAC.GTT      | 9 | 34364052 | 34364074 | 7.66667 | .                  | .        | intergenic | -0.008 | 354386 rs7919   | 2 |
| AC.GT        | 9 | 34448076 | 34448096 | 10.5    | .                  | .        | intergenic | -0.165 | .               | 3 |
| AAAC.GTTT    | 9 | 34691063 | 34691089 | 6.75    | .                  | .        | intergenic | 0.098  | rs787825136     | 2 |
| AT.AT        | 9 | 34863998 | 34864011 | 7       | .                  | .        | intergenic | -0.048 | rs789885388     | 2 |
| AT.AT        | 9 | 34941134 | 34941147 | 7       | .                  | .        | intergenic | -0.135 | 323452 rs7894   | 2 |
| AC.GT        | 9 | 34973412 | 34973455 | 22      | .                  | .        | intergenic | -0.008 | rs699194832     | 2 |
| AAAT.ATTT    | 9 | 35042103 | 35042124 | 5.5     | .                  | .        | intergenic | 0.067  | rs789567435     | 2 |
| AT.AT        | 9 | 35188415 | 35188426 | 6       | ENSSSCT00000016337 | CNTN5    | intron     | 0.076  | rs793477795     | 2 |
| AAAG.CTTT    | 9 | 35232074 | 35232093 | 5       | ENSSSCT00000016337 | CNTN5    | intron     | 0.075  | rs793121449     | 3 |
| AAT.ATT      | 9 | 35395557 | 35395581 | 8.33333 | ENSSSCT00000016337 | CNTN5    | intron     | -0.212 | rs791596313     | 2 |
| AC.GT        | 9 | 35686227 | 35686243 | 8.5     | .                  | .        | intergenic | -0.035 | .               | 2 |
| AGAT.ATCT    | 9 | 35833309 | 35833334 | 6.5     | .                  | .        | intergenic | 0.021  | rs789023534     | 2 |
| AAC.GTT      | 9 | 35948596 | 35948613 | 6       | ENSSSCT00000016338 | ARHGAP42 | intron     | 1.886  | 175691 rs7930   | 2 |
| AAC.GTT      | 9 | 36191021 | 36191056 | 12      | .                  | .        | intergenic | 0.101  | 139444 rs7899   | 4 |
| AAT.ATT      | 9 | 36335030 | 36335054 | 8.33333 | ENSSSCT00000024893 | TRPC6    | intron     | 0.286  | rs788330488     | 2 |
| AAAC.GTTT    | 9 | 36364895 | 36364909 | 3.75    | ENSSSCT00000024893 | TRPC6    | promoter   | 0.077  | 705019 rs7883   | 2 |
| AAT.ATT      | 9 | 37063588 | 37063610 | 7.66667 | .                  | .        | intergenic | .      | rs787411411     | 2 |
| AG.CT        | 9 | 37313644 | 37313654 | 5.5     | ENSSSCT00000022911 | MMP27    | intron     | 0.874  | rs791186095     | 3 |
| AG.CT        | 9 | 37313644 | 37313654 | 5.5     | ENSSSCT00000016346 | MMP27    | intron     | 0.874  | rs791186095     | 3 |
| AAAT.ATTT    | 9 | 37348659 | 37348675 | 4.25    | .                  | .        | intergenic | -0.095 | rs786279170     | 2 |
| ATCC.GGAT    | 9 | 37587476 | 37587498 | 5.75    | .                  | .        | intergenic | 0.186  | 348471 rs7901   | 3 |
| AAG.CTT      | 9 | 37946907 | 37946920 | 4.66667 | ENSSSCT00000016356 | .        | intron     | 0.118  | rs789903919     | 2 |
| AAAG.CTTT    | 9 | 38007898 | 38007910 | 3.25    | .                  | .        | intergenic | .      | 379518 rs7889   | 2 |
| AATT.AATT    | 9 | 38165449 | 38165473 | 6.25    | .                  | .        | intergenic | 0.381  | rs791868284     | 2 |
| AT.AT        | 9 | 38171419 | 38171428 | 5       | .                  | .        | intergenic | .      | rs790725554     | 2 |
| AATG.CATT    | 9 | 38237962 | 38237983 | 5.5     | .                  | .        | intergenic | -0.103 | rs786465387     | 3 |
| AC.GT        | 9 | 38334488 | 38334497 | 5       | .                  | .        | intergenic | .      | rs788778050     | 2 |
| AC.GT        | 9 | 38439746 | 38439755 | 5       | .                  | .        | intergenic | -0.006 | 274802 rs7898   | 2 |
| AT.AT        | 9 | 38470468 | 38470481 | 7       | ENSSSCT00000016357 | PDGFD    | intron     | 0.151  | rs788353894     | 2 |
| AG.CT        | 9 | 38525151 | 38525188 | 19      | ENSSSCT00000016357 | PDGFD    | intron     | -0.123 | 338827 rs7864   | 2 |
| AAAC.GTTT    | 9 | 38645506 | 38645521 | 4       | .                  | .        | intergenic | 0.25   | rs790709616     | 2 |
| AAAAC.GTTTT  | 9 | 38675975 | 38676008 | 6.8     | .                  | .        | intergenic | 0.3    | .               | 2 |
| AAAAAT.ATTTT | 9 | 38678323 | 38678344 | 3.66667 | .                  | .        | intergenic | -0.13  | rs789112714     | 2 |
| AT.AT        | 9 | 38696614 | 38696623 | 5       | .                  | .        | intergenic | .      | rs786900713     | 2 |



|               |   |          |          |         |                    |        |            |        |                 |   |
|---------------|---|----------|----------|---------|--------------------|--------|------------|--------|-----------------|---|
| AC.GT         | 9 | 38716101 | 38716111 | 5.5     | .                  | .      | intergenic | .      | rs791478261     | 2 |
| AG.CT         | 9 | 38830290 | 38830299 | 5       | .                  | .      | intergenic | 0.141  | rs394301 rs7904 | 4 |
| AC.GT         | 9 | 38835362 | 38835397 | 18      | .                  | .      | intergenic | -0.212 | rs355807 rs7878 | 4 |
| AT.AT         | 9 | 39103255 | 39103265 | 5.5     | .                  | .      | intergenic | .      | rs789143987     | 2 |
| AAC.GTT       | 9 | 39518012 | 39518025 | 4.66667 | ENSSSCT00000027751 | GRIA4  | intron     | .      | rs283823 rs7915 | 2 |
| AAAATT.AATTTT | 9 | 39596985 | 39597017 | 5.5     | ENSSSCT00000027751 | GRIA4  | intron     | .      | rs789205783     | 2 |
| AC.GT         | 9 | 39677192 | 39677227 | 18      | ENSSSCT00000027751 | GRIA4  | intron     | .      | rs791829801     | 3 |
| AT.AT         | 9 | 39792654 | 39792664 | 5.5     | ENSSSCT00000027751 | GRIA4  | intron     | 0.012  | rs155645 rs7936 | 2 |
| AAAC.GTTT     | 9 | 40206974 | 40207000 | 6.75    | ENSSSCT00000016366 | ELMOD1 | intron     | .      | rs213442 rs7876 | 2 |
| AAAG.CTTT     | 9 | 40999085 | 40999111 | 6.75    | .                  | .      | intergenic | .      | rs707461527     | 3 |
| AT.AT         | 9 | 41060062 | 41060078 | 8.5     | ENSSSCT00000016373 | KDEL2  | intron     | 0.511  | rs790261646     | 4 |
| AGAT.ATCT     | 9 | 41092555 | 41092582 | 7       | ENSSSCT00000016374 | EXPH5  | intron     | -0.095 | rs789193247     | 2 |
| AAAAC.GTTTT   | 9 | 41259476 | 41259492 | 3.4     | .                  | .      | intergenic | 0.31   | rs791931794     | 2 |
| AT.AT         | 9 | 41264211 | 41264222 | 6       | .                  | .      | intergenic | 0.396  | .               | 2 |
| AAAAG.CTTTT   | 9 | 41345409 | 41345427 | 3.8     | .                  | .      | intergenic | -0.036 | rs787204774     | 2 |
| AAAAAC.GTTTTT | 9 | 41889937 | 41889963 | 4.5     | .                  | .      | intergenic | 0.131  | rs791388179     | 2 |
| AAC.GTT       | 9 | 41939585 | 41939606 | 7.33333 | .                  | .      | intergenic | .      | rs201437 rs7897 | 2 |
| AAAC.GTTT     | 9 | 42020323 | 42020345 | 5.75    | .                  | .      | intergenic | 0.346  | rs345121 rs7873 | 2 |
| AT.AT         | 9 | 42065186 | 42065195 | 5       | .                  | .      | intergenic | .      | rs790334887     | 2 |
| AG.CT         | 9 | 42068985 | 42068998 | 7       | .                  | .      | intergenic | 0.098  | .               | 2 |
| AG.CT         | 9 | 42278783 | 42278794 | 6       | .                  | .      | intergenic | .      | rs792992348     | 2 |
| AT.AT         | 9 | 42720761 | 42720793 | 16.5    | .                  | .      | intergenic | 0.039  | rs786873057     | 2 |
| AAAG.CTTT     | 9 | 42931395 | 42931413 | 4.75    | .                  | .      | intergenic | 0.14   | rs198833 rs7929 | 2 |
| AG.CT         | 9 | 43201317 | 43201328 | 6       | ENSSSCT00000029186 | .      | intron     | .      | .               | 2 |
| AG.CT         | 9 | 43201317 | 43201328 | 6       | ENSSSCT00000016379 | .      | intron     | .      | .               | 2 |
| AAAAC.GTTTT   | 9 | 43419295 | 43419313 | 3.8     | .                  | .      | intergenic | 0.213  | rs790498450     | 2 |
| AC.GT         | 9 | 43513844 | 43513879 | 18      | .                  | .      | intergenic | .      | rs787061253     | 4 |
| AG.CT         | 9 | 43701735 | 43701744 | 5       | .                  | .      | intergenic | -0.01  | .               | 2 |
| AT.AT         | 9 | 43719487 | 43719497 | 5.5     | .                  | .      | intergenic | 0.204  | rs693095242     | 4 |
| AG.CT         | 9 | 43739553 | 43739575 | 11.5    | .                  | .      | intergenic | -0.022 | rs311601 rs7897 | 2 |
| AAAAT.ATTTT   | 9 | 43897016 | 43897042 | 5.4     | .                  | .      | intergenic | .      | rs704986473     | 2 |
| AC.GT         | 9 | 44722375 | 44722384 | 5       | .                  | .      | intergenic | 0.261  | rs791106788     | 4 |
| AT.AT         | 9 | 44850667 | 44850695 | 14.5    | .                  | .      | intergenic | .      | .               | 2 |
| AAATT.AATTT   | 9 | 45059706 | 45059723 | 3.6     | .                  | .      | intergenic | 0.274  | rs790464637     | 2 |
| AAG.CTT       | 9 | 45181283 | 45181309 | 9       | .                  | .      | intergenic | 0.029  | rs331386 rs7870 | 2 |
| AC.GT         | 9 | 45496104 | 45496122 | 9.5     | .                  | .      | intergenic | .      | rs708122071     | 3 |
| AG.CT         | 9 | 45558262 | 45558273 | 6       | .                  | .      | intergenic | 0.152  | rs786589383     | 2 |
| AC.GT         | 9 | 45582812 | 45582823 | 6       | .                  | .      | intergenic | 0.671  | rs786746114     | 2 |
| AAAC.GTTT     | 9 | 45634803 | 45634823 | 5.25    | .                  | .      | intergenic | .      | rs398560 rs7909 | 2 |
| AAC.GTT       | 9 | 45660504 | 45660521 | 6       | .                  | .      | intergenic | 0.25   | rs790449678     | 2 |
| AC.GT         | 9 | 45661402 | 45661415 | 7       | .                  | .      | intergenic | 0.165  | rs791450812     | 4 |
| AT.AT         | 9 | 45711050 | 45711060 | 5.5     | .                  | .      | intergenic | -0.145 | rs789990948     | 2 |
| AATC.GATT     | 9 | 45737446 | 45737462 | 4.25    | ENSSSCT00000034031 | NCAM1  | intron     | 0.861  | rs788095779     | 2 |
| AATC.GATT     | 9 | 45737446 | 45737462 | 4.25    | ENSSSCT00000036483 | NCAM1  | intron     | 0.861  | rs788095779     | 2 |
| AATC.GATT     | 9 | 45737446 | 45737462 | 4.25    | ENSSSCT00000032935 | NCAM1  | intron     | 0.861  | rs788095779     | 2 |
| AATC.GATT     | 9 | 45737446 | 45737462 | 4.25    | ENSSSCT00000016411 | NCAM1  | intron     | 0.861  | rs788095779     | 2 |
| AAAC.GTTT     | 9 | 45762119 | 45762133 | 3.75    | ENSSSCT00000016411 | NCAM1  | intron     | 0.201  | rs362320 rs7904 | 2 |
| AAAC.GTTT     | 9 | 45762119 | 45762133 | 3.75    | ENSSSCT00000034031 | NCAM1  | intron     | 0.201  | rs362320 rs7904 | 2 |
| AAAC.GTTT     | 9 | 45762119 | 45762133 | 3.75    | ENSSSCT00000036483 | NCAM1  | intron     | 0.201  | rs362320 rs7904 | 2 |
| AAAC.GTTT     | 9 | 45762119 | 45762133 | 3.75    | ENSSSCT00000032935 | NCAM1  | intron     | 0.201  | rs362320 rs7904 | 2 |
| AC.GT         | 9 | 45835273 | 45835283 | 5.5     | ENSSSCT00000016413 | TTC12  | intron     | 0.202  | .               | 2 |
| AT.AT         | 9 | 45844491 | 45844505 | 7.5     | ENSSSCT00000016413 | TTC12  | intron     | -0.044 | rs730478 rs7917 | 3 |
| AAG.CTT       | 9 | 45927228 | 45927240 | 4.33333 | .                  | .      | intergenic | .      | rs786990267     | 2 |
| AAG.CTT       | 9 | 45948403 | 45948420 | 6       | .                  | .      | intergenic | -0.104 | rs789892565     | 2 |
| AGGG.CCCT     | 9 | 45962279 | 45962297 | 4.75    | .                  | .      | intergenic | -0.058 | rs790440019     | 2 |
| AC.GT         | 9 | 46096770 | 46096782 | 6.5     | .                  | .      | intergenic | 0.183  | .               | 5 |
| AT.AT         | 9 | 46162039 | 46162050 | 6       | .                  | .      | intergenic | 0.042  | rs704739 rs7893 | 2 |
| AAAAC.GTTTT   | 9 | 46221331 | 46221351 | 4.2     | .                  | .      | intergenic | .      | rs703922132     | 2 |
| AAAAAC.GTTTTT | 9 | 46222566 | 46222588 | 3.83333 | .                  | .      | intergenic | 0.238  | rs786886021     | 2 |
| AG.CT         | 9 | 46326058 | 46326068 | 5.5     | .                  | .      | intergenic | 2.652  | .               | 3 |
| AAAC.GTTT     | 9 | 46661067 | 46661086 | 5       | .                  | .      | intergenic | -0.234 | rs791491049     | 2 |
| AAG.CTT       | 9 | 46663174 | 46663185 | 4       | .                  | .      | intergenic | -0.099 | .               | 2 |
| AAAGC.GCTTT   | 9 | 46703314 | 46703331 | 3.6     | .                  | .      | intergenic | 0.135  | rs793194223     | 2 |
| AAC.GTT       | 9 | 46847196 | 46847218 | 7.66667 | .                  | .      | intergenic | 0.157  | rs705520 rs7903 | 2 |
| AC.GT         | 9 | 46851575 | 46851587 | 6.5     | .                  | .      | intergenic | .      | .               | 4 |
| AAC.GTT       | 9 | 46912979 | 46912997 | 6.33333 | .                  | .      | intergenic | 0.006  | rs787721099     | 2 |
| AG.CT         | 9 | 46958237 | 46958246 | 5       | .                  | .      | intergenic | 0.139  | .               | 4 |
| AAAAAC.GTTTTT | 9 | 47825145 | 47825164 | 3.33333 | .                  | .      | intergenic | 0.594  | rs788848389     | 2 |
| AAAAG.CTTTT   | 9 | 48336468 | 48336497 | 6       | .                  | .      | intergenic | -0.022 | rs791392401     | 2 |
| AAC.GTT       | 9 | 48479279 | 48479292 | 4.66667 | .                  | .      | intergenic | 0.355  | rs137452 rs7890 | 2 |
| AAAT.ATTT     | 9 | 48482670 | 48482686 | 4.25    | .                  | .      | intergenic | -0.383 | rs356211 rs7920 | 2 |
| AC.GT         | 9 | 48750827 | 48750847 | 10.5    | .                  | .      | intergenic | 0.008  | .               | 3 |
| AG.CT         | 9 | 48773253 | 48773263 | 5.5     | .                  | .      | intergenic | -0.123 | rs789192530     | 2 |
| AAAC.GTTT     | 9 | 48864350 | 48864388 | 9.75    | .                  | .      | intergenic | 0.087  | rs789547256     | 4 |
| AAG.CTT       | 9 | 48880189 | 48880200 | 4       | .                  | .      | intergenic | .      | rs786878253     | 2 |
| AC.GT         | 9 | 49103047 | 49103059 | 6.5     | .                  | .      | intergenic | 0.267  | .               | 2 |
| AAAAC.GTTTT   | 9 | 49360027 | 49360065 | 7.8     | ENSSSCT00000016437 | SIK3   | intron     | .      | rs789012235     | 2 |
| AAAAC.GTTTT   | 9 | 49360027 | 49360065 | 7.8     | ENSSSCT00000025641 | SIK3   | intron     | .      | rs789012235     | 2 |
| AAAAT.ATTTT   | 9 | 49362663 | 49362700 | 7.6     | ENSSSCT00000016437 | SIK3   | intron     | .      | rs790846894     | 2 |
| AAAAT.ATTTT   | 9 | 49362663 | 49362700 | 7.6     | ENSSSCT00000025641 | SIK3   | intron     | .      | rs790846894     | 2 |
| AAAAAT.ATTTTT | 9 | 49438394 | 49438421 | 4.66667 | .                  | .      | intergenic | 0.254  | rs208691 rs7889 | 2 |
| AAAC.GTTT     | 9 | 49464458 | 49464481 | 6       | .                  | .      | intergenic | 0.12   | rs309462 rs7932 | 2 |
| AAAC.GTTT     | 9 | 49690922 | 49690944 | 5.75    | ENSSSCT00000016443 | RNF214 | intron     | 0.282  | rs791410222     | 2 |
| AAAT.ATTT     | 9 | 49696807 | 49696822 | 4       | ENSSSCT00000016443 | RNF214 | intron     | .      | rs791005933     | 2 |

|             |   |          |          |         |                    |          |            |        |               |   |
|-------------|---|----------|----------|---------|--------------------|----------|------------|--------|---------------|---|
| AAAT.ATTT   | 9 | 49766942 | 49766964 | 5.75    | ENSSSCT00000016446 | CEP164   | intron     | .      | rs789563997   | 2 |
| AAC.GTT     | 9 | 49784683 | 49784708 | 8.66667 | ENSSSCT00000016446 | CEP164   | intron     | .      | 313853 rs7882 | 2 |
| ATC.GAT     | 9 | 49833527 | 49833546 | 6.66667 | .                  | .        | intergenic | .      | 390937 rs7912 | 2 |
| AG.CT       | 9 | 50169268 | 50169278 | 5.5     | ENSSSCT00000016448 | .        | intron     | -0.009 | 390363 rs7125 | 3 |
| AG.CT       | 9 | 50200979 | 50200989 | 5.5     | ENSSSCT00000016448 | .        | intron     | -0.113 | .             | 4 |
| AC.GT       | 9 | 50238178 | 50238188 | 5.5     | .                  | .        | intergenic | -0.161 | .             | 2 |
| AAG.CTT     | 9 | 50282548 | 50282559 | 4       | .                  | .        | intergenic | 0.129  | rs786614785   | 2 |
| AC.GT       | 9 | 50448221 | 50448245 | 12.5    | ENSSSCT00000016452 | TMPRSS4  | intron     | 0.006  | .             | 2 |
| AC.GT       | 9 | 50579539 | 50579552 | 7       | ENSSSCT00000016456 | MPZL3    | 3'utr      | 0.333  | 770427 rs7875 | 3 |
| AAAAC.GTTTT | 9 | 50582976 | 50582994 | 3.8     | ENSSSCT00000016456 | MPZL3    | intron     | -0.053 | rs787700216   | 2 |
| AT.AT       | 9 | 50613624 | 50613635 | 6       | ENSSSCT00000016457 | MPZL2    | intron     | 0.247  | rs788906408   | 2 |
| AAAT.ATTT   | 9 | 50843964 | 50843981 | 4.5     | ENSSSCT00000027542 | IFT46    | 5'utr      | 0.519  | rs787906375   | 2 |
| AAAT.ATTT   | 9 | 50843964 | 50843981 | 4.5     | ENSSSCT00000028599 | ARCN1    | promoter   | 0.519  | rs787906375   | 2 |
| AAAAT.ATTTT | 9 | 51148386 | 51148402 | 3.4     | .                  | .        | intergenic | .      | rs791592504   | 2 |
| AG.CT       | 9 | 51220153 | 51220163 | 5.5     | .                  | .        | intergenic | -0.189 | rs792336978   | 2 |
| AT.AT       | 9 | 51293974 | 51293986 | 6.5     | .                  | .        | intergenic | .      | rs788704293   | 2 |
| AAAC.GTTT   | 9 | 51348882 | 51348899 | 4.5     | ENSSSCT00000016476 | DPAGT1   | intron     | -0.044 | rs787777958   | 2 |
| AG.CT       | 9 | 51381860 | 51381871 | 6       | ENSSSCT00000016478 | HINFP    | intron     | -0.084 | .             | 4 |
| AC.GT       | 9 | 51476962 | 51476974 | 6.5     | ENSSSCT00000016481 | CBL      | intron     | 0.197  | rs789765203   | 2 |
| AAAC.GTTT   | 9 | 51564569 | 51564587 | 4.75    | .                  | .        | intergenic | .      | rs789157038   | 2 |
| AT.AT       | 9 | 52944347 | 52944359 | 6.5     | .                  | .        | intergenic | -0.532 | .             | 2 |
| AC.GT       | 9 | 53117633 | 53117644 | 6       | ENSSSCT00000016497 | GRIK4    | intron     | 0.59   | rs788885120   | 2 |
| AG.CT       | 9 | 53218433 | 53218444 | 6       | ENSSSCT00000016497 | GRIK4    | intron     | -0.156 | rs789939211   | 2 |
| AG.CT       | 9 | 53222065 | 53222078 | 7       | ENSSSCT00000016497 | GRIK4    | intron     | 1.747  | rs786290893   | 2 |
| AAAC.GTTT   | 9 | 53421117 | 53421132 | 4       | ENSSSCT00000032235 | TECTA    | intron     | 0.048  | rs789070806   | 4 |
| ACAG.CTGT   | 9 | 53500489 | 53500508 | 5       | .                  | .        | intergenic | 0.157  | 11506 rs7902  | 2 |
| AACC.GTTT   | 9 | 53566884 | 53566905 | 5.5     | ENSSSCT00000026020 | SC5D     | intron     | 0.025  | 734646 rs7923 | 4 |
| AAAAT.ATTTT | 9 | 53807280 | 53807294 | 3       | ENSSSCT00000031058 | SORL1    | intron     | .      | rs790693585   | 2 |
| AT.AT       | 9 | 53821920 | 53821929 | 5       | ENSSSCT00000031058 | SORL1    | intron     | -0.434 | rs787021042   | 2 |
| AAGC.GCTT   | 9 | 53975964 | 53975976 | 3.25    | .                  | .        | intergenic | 0.558  | 105074 rs7892 | 2 |
| ACAT.ATGT   | 9 | 54147210 | 54147229 | 5       | .                  | .        | intergenic | .      | 345688 rs7864 | 2 |
| AC.GT       | 9 | 54174818 | 54174830 | 6.5     | .                  | .        | intergenic | -0.04  | .             | 3 |
| AAAC.GTTT   | 9 | 54218127 | 54218143 | 4.25    | .                  | .        | intergenic | .      | rs788743789   | 2 |
| AC.GT       | 9 | 54222989 | 54223003 | 7.5     | .                  | .        | intergenic | .      | rs793223508   | 2 |
| AAAC.GTTT   | 9 | 54366033 | 54366056 | 6       | .                  | .        | intergenic | .      | rs788379187   | 2 |
| AG.CT       | 9 | 54507041 | 54507052 | 6       | .                  | .        | intergenic | 0.142  | rs791322766   | 2 |
| AC.GT       | 9 | 54775255 | 54775264 | 5       | .                  | .        | intergenic | -0.051 | 366350 rs7876 | 3 |
| AAAT.ATTT   | 9 | 54812485 | 54812500 | 4       | .                  | .        | intergenic | 0.253  | rs792949313   | 2 |
| AT.AT       | 9 | 55146003 | 55146016 | 7       | ENSSSCT00000016503 | CRTAM    | intron     | 0.023  | 358272 rs7935 | 2 |
| AC.GT       | 9 | 55187281 | 55187291 | 5.5     | ENSSSCT00000016504 | C11orf63 | intron     | 0.128  | rs787511183   | 2 |
| AC.GT       | 9 | 55187281 | 55187291 | 5.5     | ENSSSCT00000025784 | C11orf63 | intron     | 0.128  | rs787511183   | 2 |
| AAAT.ATTT   | 9 | 55229087 | 55229104 | 4.5     | ENSSSCT00000016504 | C11orf63 | intron     | 0.6    | rs788704935   | 2 |
| AC.GT       | 9 | 55251648 | 55251659 | 6       | ENSSSCT00000016505 | BSX      | intron     | -0.286 | rs793258178   | 3 |
| AAAAC.GTTTT | 9 | 55608923 | 55608940 | 3.6     | .                  | .        | intergenic | 0.132  | rs787703101   | 2 |
| AAG.CTT     | 9 | 55720796 | 55720818 | 7.66667 | .                  | .        | intergenic | -0.177 | 312635 rs7891 | 2 |
| AAAAT.ATTTT | 9 | 56000211 | 56000228 | 3.6     | .                  | .        | intergenic | .      | rs791019650   | 2 |
| AAAG.CTTT   | 9 | 56541567 | 56541581 | 3.75    | ENSSSCT00000016541 | VWA5A    | intron     | 0.098  | rs793408245   | 2 |
| AAAG.CTTT   | 9 | 56541567 | 56541581 | 3.75    | ENSSSCT00000026868 | VWA5A    | intron     | 0.098  | rs793408245   | 2 |
| AAAT.ATTT   | 9 | 56595214 | 56595234 | 5.25    | .                  | .        | intergenic | 0.136  | 346402 rs7871 | 2 |
| AAAAC.GTTTT | 9 | 56725368 | 56725391 | 4.8     | .                  | .        | intergenic | .      | rs787448823   | 2 |
| AAAC.GTTT   | 9 | 56746945 | 56746967 | 5.75    | .                  | .        | intergenic | .      | rs787917629   | 2 |
| AAAAC.GTTTT | 9 | 56780575 | 56780596 | 4.4     | .                  | .        | intergenic | .      | 764760 rs7936 | 2 |
| AT.AT       | 9 | 57340640 | 57340650 | 5.5     | .                  | .        | intergenic | .      | .             | 3 |
| AT.AT       | 9 | 57418027 | 57418036 | 5       | ENSSSCT00000016562 | .        | intron     | .      | rs786429265   | 2 |
| AGG.CCT     | 9 | 57422502 | 57422520 | 6.33333 | ENSSSCT00000016562 | .        | intron     | 1.439  | 395489 rs7886 | 2 |
| AC.GT       | 9 | 57582193 | 57582208 | 8       | ENSSSCT00000016568 | ROBO3    | intron     | 0.435  | rs787830558   | 2 |
| AG.CT       | 9 | 58171085 | 58171099 | 7.5     | ENSSSCT00000016577 | .        | intron     | 0.054  | .             | 2 |
| AT.AT       | 9 | 58400778 | 58400790 | 6.5     | ENSSSCT00000016580 | STT3A    | intron     | .      | 128896 rs7864 | 2 |
| AAAAG.CTTTT | 9 | 58445916 | 58445938 | 4.6     | .                  | .        | intergenic | .      | 369280 rs7911 | 2 |
| AC.GT       | 9 | 59043411 | 59043425 | 7.5     | .                  | .        | intergenic | .      | 307064 rs7877 | 2 |
| AC.GT       | 9 | 59348239 | 59348249 | 5.5     | ENSSSCT00000016600 | KIRREL3  | intron     | .      | rs790437107   | 2 |
| AC.GT       | 9 | 59389040 | 59389056 | 8.5     | ENSSSCT00000016600 | KIRREL3  | intron     | .      | rs792300133   | 3 |
| AG.CT       | 9 | 59489872 | 59489891 | 10      | .                  | .        | intergenic | .      | rs792969792   | 2 |
| AAAAC.GTTTT | 9 | 59537127 | 59537155 | 4.83333 | .                  | .        | intergenic | .      | 334788 rs7930 | 2 |
| AG.CT       | 9 | 60281212 | 60281229 | 9       | .                  | .        | intergenic | .      | 307621 rs7876 | 2 |
| AAAC.GTTT   | 9 | 60368557 | 60368572 | 4       | .                  | .        | intergenic | .      | rs791817934   | 2 |
| AT.AT       | 9 | 60463731 | 60463743 | 6.5     | .                  | .        | intergenic | .      | 159688 rs7868 | 2 |
| AC.GT       | 9 | 60760909 | 60760950 | 21      | .                  | .        | intergenic | .      | .             | 2 |
| AC.GT       | 9 | 60846338 | 60846348 | 5.5     | .                  | .        | intergenic | .      | 375319 rs7905 | 3 |
| AC.GT       | 9 | 60894424 | 60894435 | 6       | .                  | .        | intergenic | .      | rs697083775   | 2 |
| AGAT.ATCT   | 9 | 61067534 | 61067557 | 6       | .                  | .        | intergenic | .      | rs793482509   | 2 |
| AC.GT       | 9 | 61104905 | 61104916 | 6       | .                  | .        | intergenic | .      | .             | 4 |
| ACC.GGT     | 9 | 61399865 | 61399883 | 6.33333 | .                  | .        | intergenic | .      | 352817 rs7926 | 2 |
| AC.GT       | 9 | 61401601 | 61401618 | 9       | .                  | .        | intergenic | .      | 349152 rs7867 | 2 |
| AC.GT       | 9 | 61656518 | 61656532 | 7.5     | .                  | .        | intergenic | .      | .             | 2 |
| AC.GT       | 9 | 61983824 | 61983836 | 6.5     | .                  | .        | intergenic | .      | .             | 2 |
| AC.GT       | 9 | 62800493 | 62800520 | 14      | ENSSSCT00000016610 | TMEM45B  | intron     | .      | 301449 rs7935 | 2 |
| AAAAC.GTTTT | 9 | 62981165 | 62981182 | 3.6     | ENSSSCT00000016613 | APLP2    | intron     | .      | 357305 rs7928 | 2 |
| AAAG.CTTT   | 9 | 63122406 | 63122438 | 8.25    | ENSSSCT00000016616 | ZBTB44   | intron     | .      | 331602 rs7865 | 2 |
| AAAG.CTTT   | 9 | 63122406 | 63122438 | 8.25    | ENSSSCT00000032122 | ZBTB44   | intron     | .      | 331602 rs7865 | 2 |
| AC.GT       | 9 | 63403179 | 63403190 | 6       | ENSSSCT00000016619 | ADAMTS15 | intron     | .      | .             | 3 |
| AC.GT       | 9 | 63907896 | 63907908 | 6.5     | .                  | .        | intergenic | .      | rs788166839   | 2 |
| AAAAT.ATTTT | 9 | 63920770 | 63920789 | 4       | .                  | .        | intergenic | .      | rs787244717   | 2 |
| AAAC.GTTT   | 9 | 64121538 | 64121565 | 7       | .                  | .        | intergenic | .      | rs789888398   | 2 |

|             |   |          |          |         |                    |          |            |        |               |   |
|-------------|---|----------|----------|---------|--------------------|----------|------------|--------|---------------|---|
| AAAC.GTTT   | 9 | 64580888 | 64580902 | 3.75    | .                  | .        | intergenic | .      | rs789974133   | 2 |
| AC.GT       | 9 | 64637071 | 64637099 | 14.5    | .                  | .        | intergenic | .      | rs791013889   | 2 |
| AGAT.ATCT   | 9 | 64782457 | 64782488 | 8       | .                  | .        | intergenic | .      | 248176 rs7919 | 3 |
| AAAAC.GTTTT | 9 | 64843884 | 64843906 | 4.6     | .                  | .        | intergenic | .      | 187378 rs7872 | 2 |
| AG.CT       | 9 | 64987068 | 64987080 | 6.5     | .                  | .        | intergenic | .      | rs793509422   | 2 |
| AAAAC.GTTTT | 9 | 65027858 | 65027883 | 4.33333 | .                  | .        | intergenic | .      | 336364 rs7894 | 2 |
| AAAT.ATTT   | 9 | 65034095 | 65034108 | 3.5     | .                  | .        | intergenic | .      | rs792129112   | 2 |
| AC.GT       | 9 | 65111126 | 65111137 | 6       | .                  | .        | intergenic | .      | .             | 2 |
| AT.AT       | 9 | 65237942 | 65237958 | 8.5     | ENSSSCT00000016622 | NTM      | intron     | .      | .             | 2 |
| AGAGG.CCTCT | 9 | 65263431 | 65263473 | 7.16667 | ENSSSCT00000016622 | NTM      | intron     | .      | rs698251682   | 2 |
| AAAC.GTTT   | 9 | 65278476 | 65278500 | 6.25    | ENSSSCT00000016622 | NTM      | intron     | .      | rs787033686   | 2 |
| AC.GT       | 9 | 65743975 | 65743988 | 7       | .                  | .        | intergenic | .      | rs789651972   | 2 |
| AATC.GATT   | 9 | 65822788 | 65822811 | 6       | .                  | .        | intergenic | .      | rs789367313   | 3 |
| AAAAT.ATTTT | 9 | 66213047 | 66213067 | 4.2     | .                  | .        | intergenic | .      | .             | 2 |
| AAAT.ATTT   | 9 | 66328561 | 66328582 | 5.5     | .                  | .        | intergenic | .      | 264193 rs7908 | 3 |
| AAAT.ATTT   | 9 | 66552413 | 66552425 | 3.25    | .                  | .        | intergenic | .      | rs793546199   | 2 |
| AAAT.ATTT   | 9 | 66584420 | 66584434 | 3.75    | .                  | .        | intergenic | .      | rs792632602   | 2 |
| AC.GT       | 9 | 66654231 | 66654243 | 6.5     | .                  | .        | intergenic | .      | .             | 4 |
| AC.GT       | 9 | 66925457 | 66925469 | 6.5     | .                  | .        | intergenic | .      | rs706312379   | 2 |
| AATG.CATT   | 9 | 67139833 | 67139858 | 6.5     | .                  | .        | intergenic | .      | rs792083896   | 2 |
| AG.CT       | 9 | 67457220 | 67457230 | 5.5     | ENSSSCT00000022758 | .        | intron     | .      | .             | 2 |
| AAAAT.ATTTT | 9 | 67607549 | 67607566 | 3.6     | ENSSSCT00000016627 | GLB1L2   | intron     | .      | rs793804745   | 2 |
| AC.GT       | 9 | 67826857 | 67826872 | 8       | .                  | .        | intergenic | .      | .             | 2 |
| AAAC.GTTT   | 9 | 67982422 | 67982438 | 4.25    | .                  | .        | intergenic | .      | rs787747200   | 2 |
| AAAC.GTTT   | 9 | 68038737 | 68038757 | 5.25    | .                  | .        | intergenic | .      | rs790975004   | 2 |
| AAAAC.GTTTT | 9 | 68765147 | 68765162 | 3.2     | .                  | .        | intergenic | .      | rs788994551   | 2 |
| AAAT.ATTT   | 9 | 69093670 | 69093692 | 5.75    | ENSSSCT00000024361 | GUCY1A2  | intron     | 0.279  | 301254 rs7901 | 2 |
| AAAT.ATTT   | 9 | 69093670 | 69093692 | 5.75    | ENSSSCT00000025938 | GUCY1A2  | intron     | 0.279  | 301254 rs7901 | 2 |
| AC.GT       | 9 | 69969041 | 69969076 | 18      | .                  | .        | intergenic | .      | .             | 3 |
| AT.AT       | 9 | 70405802 | 70405815 | 7       | .                  | .        | intergenic | 0.196  | rs791525943   | 2 |
| AAC.GTT     | 9 | 70436021 | 70436036 | 5.33333 | .                  | .        | intergenic | .      | rs788953329   | 2 |
| ATC.GAT     | 9 | 70470600 | 70470630 | 10.3333 | .                  | .        | intergenic | 0.164  | rs790068581   | 2 |
| AAAT.ATTT   | 9 | 70908143 | 70908161 | 4.75    | ENSSSCT00000023057 | SNRPE    | promoter   | 0.178  | rs789287067   | 2 |
| AG.CT       | 9 | 70966784 | 70966797 | 7       | .                  | .        | intergenic | .      | rs789012955   | 2 |
| AG.CT       | 9 | 70993879 | 70993889 | 5.5     | .                  | .        | intergenic | .      | .             | 3 |
| AAAC.GTTT   | 9 | 71149242 | 71149260 | 4.75    | .                  | .        | intergenic | .      | rs793212952   | 2 |
| AC.GT       | 9 | 71472095 | 71472107 | 6.5     | ENSSSCT00000016654 | PIK3C2B  | intron     | 0.031  | rs788259913   | 2 |
| AC.GT       | 9 | 71489065 | 71489100 | 18      | ENSSSCT00000016654 | PIK3C2B  | intron     | 0.615  | rs786754553   | 3 |
| AAAAC.GTTTT | 9 | 71709416 | 71709443 | 5.6     | .                  | .        | intergenic | -0.01  | .             | 2 |
| AAAAC.GTTTT | 9 | 71778670 | 71778693 | 4       | .                  | .        | intergenic | -0.427 | 243548 rs7873 | 2 |
| AC.GT       | 9 | 72281071 | 72281084 | 7       | ENSSSCT00000016662 | LEMD1    | intron     | -0.067 | rs793853417   | 2 |
| AG.CT       | 9 | 72410270 | 72410282 | 6.5     | .                  | .        | intergenic | -0.28  | rs692243873   | 3 |
| AAAAT.ATTTT | 9 | 72574540 | 72574567 | 5.6     | ENSSSCT00000028838 | ELK4     | intron     | 0.187  | rs792854051   | 2 |
| AC.GT       | 9 | 72665304 | 72665317 | 7       | .                  | .        | intergenic | 0.266  | .             | 3 |
| AC.GT       | 9 | 72875995 | 72876012 | 9       | .                  | .        | intergenic | -0.093 | rs790371111   | 2 |
| AT.AT       | 9 | 72902796 | 72902805 | 5       | .                  | .        | intergenic | .      | .             | 2 |
| AC.GT       | 9 | 73000639 | 73000661 | 11.5    | ENSSSCT00000017034 | C1orf186 | intron     | .      | rs791086610   | 2 |
| AAAC.GTTT   | 9 | 73005367 | 73005389 | 5.75    | ENSSSCT00000017034 | C1orf186 | intron     | -0.076 | rs791251087   | 2 |
| AAC.GTT     | 9 | 73068705 | 73068737 | 11      | .                  | .        | intergenic | .      | 111236 rs7867 | 2 |
| AT.AT       | 9 | 73073030 | 73073039 | 5       | .                  | .        | intergenic | -0.393 | rs793592742   | 2 |
| AAAT.ATTT   | 9 | 73078420 | 73078434 | 3.75    | .                  | .        | intergenic | 0.488  | rs793260342   | 2 |
| AC.GT       | 9 | 73228050 | 73228078 | 14.5    | ENSSSCT00000017041 | SRGAP2   | intron     | 0.076  | 290770 rs7890 | 2 |
| AAG.CTT     | 9 | 73288306 | 73288325 | 6.66667 | ENSSSCT00000017041 | SRGAP2   | intron     | -0.192 | rs790275853   | 2 |
| AAAC.GTTT   | 9 | 73305861 | 73305879 | 4.75    | ENSSSCT00000017041 | SRGAP2   | intron     | 0.16   | rs788241238   | 2 |
| AAAC.GTTT   | 9 | 73637225 | 73637246 | 5.5     | .                  | .        | intergenic | -0.053 | rs788550820   | 2 |
| AATC.GATT   | 9 | 74112158 | 74112188 | 7.75    | ENSSSCT00000017060 | C4BPA    | intron     | 0.115  | 142188 rs7901 | 2 |
| AC.GT       | 9 | 74464037 | 74464047 | 5.5     | ENSSSCT00000028859 | CR2      | intron     | 0.156  | rs787583275   | 3 |
| AAAC.GTTT   | 9 | 74488139 | 74488161 | 5.75    | ENSSSCT00000028859 | CR2      | intron     | 0.326  | 337833 rs7896 | 3 |
| AC.GT       | 9 | 74523899 | 74523913 | 7.5     | ENSSSCT00000033340 | CR1      | intron     | -0.14  | rs786767276   | 4 |
| AG.CT       | 9 | 75038982 | 75038998 | 8.5     | .                  | .        | intergenic | 0.048  | rs791050818   | 2 |
| AT.AT       | 9 | 75051972 | 75051984 | 6.5     | .                  | .        | intergenic | 0.624  | rs788021079   | 3 |
| AC.GT       | 9 | 75230830 | 75230849 | 10      | .                  | .        | intergenic | 0.556  | .             | 2 |
| AT.AT       | 9 | 75258997 | 75259006 | 5       | .                  | .        | intergenic | -0.042 | .             | 2 |
| AC.GT       | 9 | 75274162 | 75274179 | 9       | .                  | .        | intergenic | .      | rs708587834   | 5 |
| AAAC.GTTT   | 9 | 75310954 | 75310968 | 3.75    | .                  | .        | intergenic | 0.016  | rs793052814   | 2 |
| AAC.GTT     | 9 | 75484992 | 75485005 | 4.66667 | .                  | .        | intergenic | -0.092 | rs789661865   | 2 |
| AAAC.GTTT   | 9 | 75546068 | 75546092 | 6.25    | .                  | .        | intergenic | -0.045 | rs791048013   | 2 |
| AC.GT       | 9 | 75607624 | 75607639 | 8       | .                  | .        | intergenic | .      | .             | 2 |
| ATC.GAT     | 9 | 75639123 | 75639139 | 5.66667 | .                  | .        | intergenic | 0.023  | rs793517484   | 2 |
| AC.GT       | 9 | 75710416 | 75710426 | 5.5     | .                  | .        | intergenic | -0.13  | rs787156089   | 2 |
| AAAAG.CTTTT | 9 | 75853493 | 75853512 | 4       | .                  | .        | intergenic | 0.004  | rs790689585   | 2 |
| AG.CT       | 9 | 75978205 | 75978219 | 7.5     | .                  | .        | intergenic | .      | rs792697806   | 2 |
| AAAC.GTTT   | 9 | 76008247 | 76008267 | 5.25    | .                  | .        | intergenic | -0.067 | 245423 rs7892 | 3 |
| AG.CT       | 9 | 76091413 | 76091435 | 11.5    | .                  | .        | intergenic | -0.347 | rs789926364   | 2 |
| AAAT.ATTT   | 9 | 76170537 | 76170560 | 6       | .                  | .        | intergenic | .      | 364816 rs7864 | 2 |
| AAACT.AGTTT | 9 | 76261173 | 76261190 | 3       | .                  | .        | intergenic | .      | rs787310633   | 2 |
| AAC.GTT     | 9 | 76464348 | 76464359 | 4       | .                  | .        | intergenic | 0.371  | rs694693675   | 3 |
| AAAG.CTTT   | 9 | 76574170 | 76574184 | 3.75    | .                  | .        | intergenic | .      | rs690021944   | 2 |
| AC.GT       | 9 | 76682149 | 76682163 | 7.5     | .                  | .        | intergenic | 0.298  | rs790581964   | 2 |
| AAAC.GTTT   | 9 | 76742405 | 76742429 | 6.25    | .                  | .        | intergenic | 0.215  | rs793315469   | 2 |
| AAT.ATT     | 9 | 77273241 | 77273257 | 5.66667 | .                  | .        | intergenic | 0.04   | rs787119386   | 2 |
| AAT.ATT     | 9 | 77341068 | 77341097 | 10      | ENSSSCT00000016680 | CDK14    | intron     | 0.246  | 717069 rs7868 | 2 |
| AG.CT       | 9 | 77368798 | 77368807 | 5       | ENSSSCT00000016680 | CDK14    | intron     | .      | .             | 4 |
| AC.GT       | 9 | 77771683 | 77771692 | 5       | ENSSSCT00000016680 | CDK14    | intron     | .      | rs791743949   | 3 |

|             |   |          |          |         |                    |          |            |        |               |   |
|-------------|---|----------|----------|---------|--------------------|----------|------------|--------|---------------|---|
| AAAC.GTTT   | 9 | 77867483 | 77867501 | 4.75    | .                  | .        | intergenic | 0.216  | rs789469730   | 2 |
| AT.AT       | 9 | 77931326 | 77931349 | 12      | .                  | .        | intergenic | 0.575  | rs789188889   | 2 |
| AAGG.CCTT   | 9 | 77944518 | 77944539 | 5.5     | .                  | .        | intergenic | 0.212  | 745637 rs7938 | 2 |
| AT.AT       | 9 | 78374389 | 78374399 | 5.5     | .                  | .        | intergenic | .      | .             | 2 |
| AAG.CTT     | 9 | 78443272 | 78443284 | 4.33333 | .                  | .        | intergenic | 0.249  | rs788404199   | 2 |
| AT.AT       | 9 | 78539522 | 78539532 | 5.5     | .                  | .        | intergenic | 0.316  | 355769 rs7868 | 2 |
| AT.AT       | 9 | 78559071 | 78559085 | 7.5     | .                  | .        | intergenic | 0.256  | 236153 rs7909 | 4 |
| AG.CT       | 9 | 78863569 | 78863579 | 5.5     | .                  | .        | intergenic | .      | rs787751365   | 2 |
| AAGG.CCTT   | 9 | 79211519 | 79211537 | 4.75    | ENSSSCT00000016690 | FAM133B  | intron     | .      | rs789513491   | 2 |
| AC.GT       | 9 | 79297795 | 79297822 | 14      | ENSSSCT00000036613 | CDK6     | intron     | 0.054  | 202735 rs7863 | 3 |
| AAAAG.CTTTT | 9 | 79300105 | 79300133 | 5.8     | ENSSSCT00000036613 | CDK6     | intron     | 0.908  | rs792838967   | 2 |
| AAAAC.GTTTT | 9 | 79303425 | 79303452 | 5.6     | ENSSSCT00000036613 | CDK6     | intron     | 0.181  | rs789694558   | 2 |
| AAAC.GTTT   | 9 | 79702735 | 79702757 | 5.75    | .                  | .        | intergenic | .      | 202827 rs7919 | 2 |
| AGAT.ATCT   | 9 | 79813542 | 79813560 | 4.75    | ENSSSCT00000024549 | HEPACAM2 | intron     | 0.303  | rs791948749   | 2 |
| AGAT.ATCT   | 9 | 79813542 | 79813560 | 4.75    | ENSSSCT00000028375 | HEPACAM2 | intron     | 0.303  | rs791948749   | 2 |
| AAAAT.ATTTT | 9 | 80079885 | 80079903 | 3.8     | .                  | .        | intergenic | .      | rs790622197   | 2 |
| AAAT.ATTT   | 9 | 80084488 | 80084508 | 5.25    | ENSSSCT00000032573 | .        | promoter   | 2.021  | .             | 2 |
| AAT.ATT     | 9 | 80084747 | 80084766 | 6.66667 | ENSSSCT00000032573 | .        | intron     | 2.077  | .             | 3 |
| AG.CT       | 9 | 80532456 | 80532470 | 7.5     | .                  | .        | intergenic | 0.298  | rs789878003   | 2 |
| AAC.GTT     | 9 | 81514023 | 81514042 | 6.66667 | ENSSSCT00000016700 | CASD1    | intron     | .      | rs789961539   | 2 |
| AAAC.GTTT   | 9 | 81537783 | 81537801 | 4.75    | ENSSSCT00000016700 | CASD1    | intron     | 0.267  | rs790141777   | 2 |
| AAAAC.GTTTT | 9 | 81719290 | 81719317 | 5.6     | .                  | .        | intergenic | .      | 377614 rs7868 | 3 |
| AAC.GTT     | 9 | 82277488 | 82277502 | 5       | .                  | .        | intergenic | 0.211  | rs791170207   | 2 |
| ATC.GAT     | 9 | 82558243 | 82558262 | 6.66667 | ENSSSCT00000016706 | ASB4     | intron     | 0.345  | rs702251457   | 2 |
| ACAT.ATGT   | 9 | 82588465 | 82588485 | 5.25    | .                  | .        | intergenic | 0.029  | rs710374313   | 2 |
| AAAAC.GTTTT | 9 | 82752115 | 82752145 | 6.2     | .                  | .        | intergenic | .      | rs789624486   | 2 |
| AAC.GTT     | 9 | 83113286 | 83113299 | 4.66667 | ENSSSCT00000016708 | DYNC111  | intron     | .      | 189078 rs7912 | 2 |
| AG.CT       | 9 | 83139318 | 83139330 | 6.5     | ENSSSCT00000016708 | DYNC111  | intron     | 0.19   | .             | 4 |
| AT.AT       | 9 | 83367427 | 83367443 | 8.5     | .                  | .        | intergenic | 0.238  | rs790572509   | 2 |
| AC.GT       | 9 | 84022824 | 84022839 | 8       | .                  | .        | intergenic | -0.003 | .             | 2 |
| AC.GT       | 9 | 84133248 | 84133258 | 5.5     | .                  | .        | intergenic | 1.385  | .             | 2 |
| AAC.GTT     | 9 | 84317213 | 84317229 | 5.66667 | .                  | .        | intergenic | .      | rs792677837   | 2 |
| ACAT.ATGT   | 9 | 84387259 | 84387277 | 4.75    | .                  | .        | intergenic | 0.06   | rs790464505   | 2 |
| AC.GT       | 9 | 84671054 | 84671069 | 8       | .                  | .        | intergenic | 0.05   | .             | 2 |
| AAAAC.GTTTT | 9 | 84787117 | 84787140 | 4.8     | .                  | .        | intergenic | 0.287  | 734990 rs7933 | 2 |
| AT.AT       | 9 | 84822643 | 84822653 | 5.5     | .                  | .        | intergenic | .      | rs789026999   | 2 |
| AAAC.GTTT   | 9 | 84872138 | 84872157 | 5       | .                  | .        | intergenic | .      | 323984 rs7937 | 2 |
| AAC.GTT     | 9 | 84879293 | 84879304 | 4       | .                  | .        | intergenic | -0.501 | .             | 2 |
| AAAC.GTTT   | 9 | 85053689 | 85053708 | 5       | .                  | .        | intergenic | 0.28   | rs789673825   | 2 |
| AAC.GTT     | 9 | 85269497 | 85269515 | 6.33333 | ENSSSCT00000016715 | COL28A1  | intron     | 0.059  | .             | 2 |
| ACAT.ATGT   | 9 | 85471167 | 85471181 | 3.75    | ENSSSCT00000016715 | COL28A1  | intron     | .      | rs791493941   | 2 |
| AAC.GTT     | 9 | 85513076 | 85513091 | 5.33333 | .                  | .        | intergenic | 0.186  | rs694846967   | 2 |
| AGAT.ATCT   | 9 | 86176104 | 86176136 | 8.25    | .                  | .        | intergenic | 0.14   | 353238 rs7930 | 2 |
| AAC.GTT     | 9 | 86178709 | 86178722 | 4.66667 | .                  | .        | intergenic | 0.069  | rs792571638   | 2 |
| AC.GT       | 9 | 86454420 | 86454432 | 6.5     | .                  | .        | intergenic | 0.032  | rs788667026   | 2 |
| AT.AT       | 9 | 86672864 | 86672874 | 5.5     | .                  | .        | intergenic | 0.02   | rs789178435   | 2 |
| AC.GT       | 9 | 86674713 | 86674722 | 5       | .                  | .        | intergenic | .      | rs790870834   | 3 |
| AGAT.ATCT   | 9 | 86974699 | 86974713 | 3.75    | .                  | .        | intergenic | .      | 363992 rs7938 | 2 |
| AC.GT       | 9 | 87184700 | 87184710 | 5.5     | .                  | .        | intergenic | .      | rs786706727   | 2 |
| AAAAC.GTTTT | 9 | 87228031 | 87228053 | 4.6     | .                  | .        | intergenic | 0.379  | rs790154592   | 2 |
| AT.AT       | 9 | 87257167 | 87257177 | 5.5     | .                  | .        | intergenic | 0.185  | 762759 rs7883 | 2 |
| AG.CT       | 9 | 87763573 | 87763587 | 7.5     | .                  | .        | intergenic | 0.742  | rs791066314   | 2 |
| AC.GT       | 9 | 87825501 | 87825515 | 7.5     | .                  | .        | intergenic | -0.079 | .             | 2 |
| AAAC.GTTT   | 9 | 87855027 | 87855046 | 5       | .                  | .        | intergenic | .      | rs790894964   | 2 |
| AAAG.CTTT   | 9 | 87974855 | 87974866 | 3       | .                  | .        | intergenic | .      | rs787297553   | 2 |
| AT.AT       | 9 | 87979180 | 87979189 | 5       | .                  | .        | intergenic | 0.092  | .             | 2 |
| AC.GT       | 9 | 88159941 | 88159958 | 9       | .                  | .        | intergenic | 0.101  | 275569 rs7929 | 2 |
| AAC.GTT     | 9 | 88479607 | 88479626 | 6.66667 | .                  | .        | intergenic | .      | rs789119057   | 2 |
| AG.CT       | 9 | 88479869 | 88479880 | 6       | .                  | .        | intergenic | .      | rs788446265   | 2 |
| AT.AT       | 9 | 88544553 | 88544563 | 5.5     | .                  | .        | intergenic | 0.227  | rs787581329   | 2 |
| AG.CT       | 9 | 88580265 | 88580277 | 6.5     | .                  | .        | intergenic | .      | .             | 2 |
| AG.CT       | 9 | 88642602 | 88642612 | 5.5     | ENSSSCT00000030889 | PHF14    | cds        | 2.309  | .             | 2 |
| AG.CT       | 9 | 88642602 | 88642612 | 5.5     | ENSSSCT00000031171 | PHF14    | cds        | 2.309  | .             | 2 |
| AG.CT       | 9 | 88642602 | 88642612 | 5.5     | ENSSSCT00000032105 | PHF14    | cds        | 2.309  | .             | 2 |
| AAG.CTT     | 9 | 88843124 | 88843139 | 5.33333 | .                  | .        | intergenic | .      | rs791915238   | 2 |
| ATCC.GGAT   | 9 | 88940294 | 88940335 | 10.5    | ENSSSCT00000024928 | THSD7A   | intron     | 0.121  | .             | 2 |
| ATCC.GGAT   | 9 | 88940294 | 88940335 | 10.5    | ENSSSCT00000025355 | THSD7A   | intron     | 0.121  | .             | 2 |
| ATCC.GGAT   | 9 | 88940294 | 88940335 | 10.5    | ENSSSCT00000016724 | THSD7A   | intron     | 0.121  | .             | 2 |
| AAAT.ATTT   | 9 | 89107787 | 89107804 | 4.5     | ENSSSCT00000024928 | THSD7A   | intron     | 0.008  | rs786284705   | 2 |
| AAAT.ATTT   | 9 | 89107787 | 89107804 | 4.5     | ENSSSCT00000025355 | THSD7A   | intron     | 0.008  | rs786284705   | 2 |
| AAAT.ATTT   | 9 | 89107787 | 89107804 | 4.5     | ENSSSCT00000016724 | THSD7A   | intron     | 0.008  | rs786284705   | 2 |
| AC.GT       | 9 | 89579605 | 89579615 | 5.5     | .                  | .        | intergenic | 0.076  | .             | 2 |
| AAT.ATT     | 9 | 90032373 | 90032387 | 5       | .                  | .        | intergenic | 0.006  | rs792405219   | 2 |
| AAAC.GTTT   | 9 | 90197333 | 90197365 | 8.25    | .                  | .        | intergenic | 0.146  | rs787398444   | 3 |
| AAAAC.GTTTT | 9 | 90333750 | 90333771 | 4.4     | ENSSSCT00000016727 | SCIN     | intron     | .      | rs791288304   | 3 |
| AT.AT       | 9 | 90408763 | 90408774 | 6       | .                  | .        | intergenic | 0.267  | rs786498153   | 2 |
| AG.CT       | 9 | 90471190 | 90471201 | 6       | .                  | .        | intergenic | 0.406  | rs790059667   | 2 |
| AAC.GTT     | 9 | 91103378 | 91103397 | 6.66667 | .                  | .        | intergenic | -0.094 | rs789121382   | 2 |
| AAAAT.ATTTT | 9 | 91174317 | 91174336 | 4       | .                  | .        | intergenic | 0.096  | rs790488362   | 2 |
| AC.GT       | 9 | 91418828 | 91418839 | 6       | .                  | .        | intergenic | .      | rs791779119   | 2 |
| AC.GT       | 9 | 91492431 | 91492441 | 5.5     | .                  | .        | intergenic | -0.225 | rs790945136   | 2 |
| AAAC.GTTT   | 9 | 91539836 | 91539862 | 6.75    | ENSSSCT00000029225 | ETV1     | intron     | 0.087  | 240149 rs7927 | 2 |
| AAAAC.GTTTT | 9 | 92220533 | 92220566 | 5.66667 | .                  | .        | intergenic | .      | 169294 rs7916 | 2 |
| AATT.AATT   | 9 | 92297509 | 92297526 | 4.5     | .                  | .        | intergenic | -0.121 | 799856 rs7905 | 2 |

|             |   |           |           |         |                    |         |            |        |               |   |
|-------------|---|-----------|-----------|---------|--------------------|---------|------------|--------|---------------|---|
| AAAC.GTTT   | 9 | 92491725  | 92491745  | 5.25    | .                  | .       | intergenic | .      | rs787689991   | 2 |
| AT.AT       | 9 | 92551911  | 92551920  | 5       | .                  | .       | intergenic | -0.172 | rs789683011   | 3 |
| AAT.ATT     | 9 | 93223373  | 93223386  | 4.66667 | .                  | .       | intergenic | -0.019 | rs788235429   | 2 |
| ATC.GAT     | 9 | 93249427  | 93249438  | 4       | ENSSSCT00000016731 | .       | intron     | 1.27   | .             | 2 |
| AAAC.GTTT   | 9 | 93376045  | 93376065  | 5.25    | .                  | .       | intergenic | .      | 386044 rs7922 | 2 |
| AAAG.CTTT   | 9 | 93868217  | 93868243  | 6.75    | .                  | .       | intergenic | -0.017 | 503720 rs7930 | 2 |
| AAAC.GTTT   | 9 | 94127974  | 94127992  | 4.75    | .                  | .       | intergenic | -0.04  | rs789282185   | 2 |
| AT.AT       | 9 | 94153285  | 94153294  | 5       | .                  | .       | intergenic | 0.059  | rs790581864   | 3 |
| AT.AT       | 9 | 94238610  | 94238622  | 6.5     | .                  | .       | intergenic | -0.04  | .             | 2 |
| AT.AT       | 9 | 94239421  | 94239445  | 12.5    | .                  | .       | intergenic | 0.217  | rs790377964   | 5 |
| AAAAC.GTTTT | 9 | 94334745  | 94334767  | 4.6     | ENSSSCT00000029064 | .       | intron     | .      | rs789611584   | 2 |
| AAAT.ATTT   | 9 | 94389448  | 94389469  | 5.5     | ENSSSCT00000029064 | .       | intron     | 0.026  | 555767 rs7873 | 2 |
| AAAT.ATTT   | 9 | 94576270  | 94576296  | 6.75    | .                  | .       | intergenic | .      | .             | 2 |
| AAAT.ATTT   | 9 | 94858252  | 94858265  | 3.5     | .                  | .       | intergenic | -0.191 | rs792051717   | 2 |
| AAAAC.GTTTT | 9 | 95141258  | 95141277  | 4       | .                  | .       | intergenic | .      | rs793549523   | 2 |
| AT.AT       | 9 | 95172700  | 95172709  | 5       | .                  | .       | intergenic | 0.086  | rs790689400   | 2 |
| AT.AT       | 9 | 95311912  | 95311926  | 7.5     | .                  | .       | intergenic | .      | rs792993351   | 2 |
| AG.CT       | 9 | 95392308  | 95392318  | 5.5     | ENSSSCT00000027011 | .       | promoter   | .      | .             | 2 |
| AG.CT       | 9 | 95392308  | 95392318  | 5.5     | ENSSSCT00000016739 | .       | promoter   | .      | .             | 2 |
| AT.AT       | 9 | 95744616  | 95744626  | 5.5     | .                  | .       | intergenic | 0.02   | 733443 rs7899 | 3 |
| AAAAG.CTTTT | 9 | 95807836  | 95807878  | 7.16667 | .                  | .       | intergenic | 0.01   | 145759 rs7934 | 2 |
| AT.AT       | 9 | 95876529  | 95876544  | 8       | .                  | .       | intergenic | 0.052  | rs790042417   | 2 |
| AC.GT       | 9 | 95939519  | 95939532  | 7       | .                  | .       | intergenic | .      | .             | 2 |
| AAT.ATT     | 9 | 95972995  | 95973007  | 4.33333 | .                  | .       | intergenic | 0.029  | rs704451919   | 2 |
| AG.CT       | 9 | 96012796  | 96012806  | 5.5     | ENSSSCT00000029645 | SNX13   | intron     | .      | .             | 2 |
| AAAC.GTTT   | 9 | 96018738  | 96018765  | 7       | ENSSSCT00000029645 | SNX13   | intron     | 0.32   | 504535 rs7899 | 2 |
| AAAAC.GTTTT | 9 | 96100711  | 96100733  | 3.83333 | ENSSSCT00000029645 | SNX13   | intron     | .      | 346110 rs7920 | 2 |
| AC.GT       | 9 | 96202468  | 96202478  | 5.5     | .                  | .       | intergenic | 0.426  | rs793395249   | 2 |
| AC.GT       | 9 | 96236296  | 96236310  | 7.5     | .                  | .       | intergenic | .      | 371429 rs7916 | 3 |
| AG.CT       | 9 | 96520749  | 96520763  | 7.5     | .                  | .       | intergenic | 0.136  | rs788396659   | 2 |
| AAAC.GTTT   | 9 | 96561370  | 96561384  | 3.75    | .                  | .       | intergenic | 0.373  | 748442 rs7887 | 2 |
| AG.CT       | 9 | 96584640  | 96584657  | 9       | .                  | .       | intergenic | -0.113 | rs788747541   | 2 |
| AAT.ATT     | 9 | 96616191  | 96616214  | 8       | .                  | .       | intergenic | .      | 599828 rs7936 | 2 |
| AGG.CCT     | 9 | 97075027  | 97075042  | 5.33333 | .                  | .       | intergenic | 1.745  | rs792427080   | 2 |
| AT.AT       | 9 | 97093126  | 97093137  | 6       | .                  | .       | intergenic | .      | .             | 2 |
| AT.AT       | 9 | 97152962  | 97152973  | 6       | .                  | .       | intergenic | .      | rs789288586   | 2 |
| AAAT.ATTT   | 9 | 97292876  | 97292894  | 4.75    | .                  | .       | intergenic | 0.066  | .             | 2 |
| AT.AT       | 9 | 97471253  | 97471265  | 6.5     | .                  | .       | intergenic | 0.185  | rs790788601   | 2 |
| AAAG.CTTT   | 9 | 97564524  | 97564543  | 5       | .                  | .       | intergenic | -0.273 | rs787339683   | 2 |
| AC.GT       | 9 | 97798367  | 97798379  | 6.5     | .                  | .       | intergenic | .      | rs786771774   | 4 |
| AC.GT       | 9 | 98069557  | 98069571  | 7.5     | .                  | .       | intergenic | 0.26   | rs790106814   | 2 |
| AAT.ATT     | 9 | 98116403  | 98116419  | 5.66667 | .                  | .       | intergenic | .      | rs793044333   | 2 |
| AAAT.ATTT   | 9 | 98177440  | 98177455  | 4       | .                  | .       | intergenic | 0.059  | rs787218709   | 2 |
| AAAAT.ATTTT | 9 | 98190141  | 98190158  | 3.6     | .                  | .       | intergenic | -0.037 | rs788688215   | 2 |
| AG.CT       | 9 | 98229597  | 98229633  | 18.5    | .                  | .       | intergenic | 0.031  | rs789373164   | 2 |
| AC.GT       | 9 | 98314832  | 98314845  | 7       | .                  | .       | intergenic | 0.051  | rs787733015   | 2 |
| AT.AT       | 9 | 98328636  | 98328646  | 5.5     | ENSSSCT00000025990 | MACC1   | intron     | 0.01   | rs789932055   | 2 |
| AT.AT       | 9 | 98335899  | 98335915  | 8.5     | ENSSSCT00000025990 | MACC1   | intron     | 0.252  | rs788330170   | 3 |
| AAAC.GTTT   | 9 | 98456486  | 98456505  | 5       | .                  | .       | intergenic | 0.16   | 114895 rs7873 | 2 |
| AAAC.GTTT   | 9 | 98925980  | 98925999  | 5       | ENSSSCT00000016752 | ABC5    | intron     | 0.123  | rs789121637   | 2 |
| AC.GT       | 9 | 99190973  | 99191006  | 17      | .                  | .       | intergenic | 0.183  | 303552 rs7915 | 2 |
| AAAAT.ATTTT | 9 | 99234924  | 99234948  | 5       | .                  | .       | intergenic | 0.274  | 766312 rs7863 | 2 |
| AAAC.GTTT   | 9 | 99625954  | 99625975  | 5.5     | .                  | .       | intergenic | 0.026  | rs787704710   | 2 |
| AAAC.GTTT   | 9 | 99843986  | 99844002  | 4.25    | ENSSSCT00000016754 | DNAH11  | intron     | .      | rs790662068   | 2 |
| AT.AT       | 9 | 99880678  | 99880692  | 7.5     | ENSSSCT00000016754 | DNAH11  | intron     | .      | rs788166128   | 2 |
| AC.GT       | 9 | 99905290  | 99905301  | 6       | ENSSSCT00000016754 | DNAH11  | intron     | .      | rs707623446   | 3 |
| AAAC.GTTT   | 9 | 99915095  | 99915106  | 3       | ENSSSCT00000016754 | DNAH11  | intron     | 1.63   | rs787981669   | 2 |
| AAT.ATT     | 9 | 100003894 | 100003916 | 7.66667 | ENSSSCT00000016754 | DNAH11  | intron     | -0.024 | rs787827182   | 2 |
| AC.GT       | 9 | 100052895 | 100052906 | 6       | ENSSSCT00000016754 | DNAH11  | intron     | .      | rs788598533   | 2 |
| AAAAC.GTTTT | 9 | 100058648 | 100058666 | 3.8     | ENSSSCT00000016754 | DNAH11  | intron     | -0.321 | rs787320055   | 2 |
| AAAAG.CTTTT | 9 | 100059656 | 100059671 | 3.2     | ENSSSCT00000016754 | DNAH11  | intron     | -0.149 | rs790415367   | 2 |
| AAAAC.GTTTT | 9 | 100154382 | 100154397 | 3.2     | ENSSSCT00000016754 | DNAH11  | intron     | 0.163  | rs791760435   | 2 |
| AAAAG.CTTTT | 9 | 100238989 | 100239015 | 5.4     | .                  | .       | intergenic | .      | rs792009992   | 2 |
| AAC.GTT     | 9 | 100280230 | 100280244 | 5       | .                  | .       | intergenic | 0.121  | rs793683589   | 4 |
| AAC.GTT     | 9 | 100399291 | 100399307 | 5.66667 | .                  | .       | intergenic | -0.221 | 247264 rs7923 | 2 |
| AAAC.GTTT   | 9 | 100419459 | 100419486 | 7       | ENSSSCT00000016758 | RAPGEF5 | intron     | 0.571  | rs789154067   | 2 |
| AC.GT       | 9 | 100434024 | 100434042 | 9.5     | ENSSSCT00000016758 | RAPGEF5 | intron     | -0.003 | 164050 rs7926 | 2 |
| AAAC.GTTT   | 9 | 100461838 | 100461862 | 6.25    | ENSSSCT00000016758 | RAPGEF5 | intron     | -0.044 | rs788295783   | 2 |
| AAAAC.GTTTT | 9 | 100651812 | 100651840 | 5.8     | .                  | .       | intergenic | 0.079  | rs704208738   | 2 |
| AC.GT       | 9 | 100859740 | 100859771 | 16      | .                  | .       | intergenic | .      | rs792884417   | 2 |
| ATC.GAT     | 9 | 101192322 | 101192339 | 6       | .                  | .       | intergenic | 0.241  | rs712173891   | 2 |
| AAC.GTT     | 9 | 101254353 | 101254366 | 4.66667 | ENSSSCT00000022993 | FAM126A | intron     | 0.253  | rs788169672   | 2 |
| AAC.GTT     | 9 | 101254353 | 101254366 | 4.66667 | ENSSSCT00000016761 | FAM126A | intron     | 0.253  | rs788169672   | 2 |
| AAAAT.ATTTT | 9 | 101500607 | 101500628 | 4.4     | .                  | .       | intergenic | -0.039 | rs793106616   | 2 |
| AC.GT       | 9 | 101555684 | 101555698 | 7.5     | ENSSSCT00000030773 | .       | intron     | 1.359  | rs789712567   | 2 |
| AC.GT       | 9 | 101717328 | 101717340 | 6.5     | ENSSSCT00000029993 | IGF2BP3 | intron     | .      | rs788299579   | 2 |
| AT.AT       | 9 | 102088039 | 102088050 | 6       | ENSSSCT00000026738 | RUND3B  | intron     | .      | rs788349748   | 2 |
| AT.AT       | 9 | 102088039 | 102088050 | 6       | ENSSSCT00000030941 | RUND3B  | intron     | .      | rs788349748   | 2 |
| AAAC.GTTT   | 9 | 102170202 | 102170216 | 3.75    | .                  | .       | intergenic | .      | rs788164439   | 2 |
| AAAAC.GTTTT | 9 | 102405959 | 102405986 | 5.6     | .                  | .       | intergenic | .      | rs786208115   | 2 |
| AAAG.CTTT   | 9 | 102513674 | 102513697 | 6       | .                  | .       | intergenic | 0.053  | rs791834419   | 2 |
| AAC.GTT     | 9 | 102618958 | 102618977 | 6.66667 | ENSSSCT00000016765 | PGP1A   | intron     | 0.153  | 333088 rs7872 | 2 |
| AAC.GTT     | 9 | 102618958 | 102618977 | 6.66667 | ENSSSCT00000034567 | PGP1A   | intron     | 0.153  | 333088 rs7872 | 2 |
| AAAAG.CTTTT | 9 | 102749507 | 102749526 | 4       | ENSSSCT00000016766 | CROT    | intron     | 0.001  | rs787977186   | 2 |

|               |   |           |           |         |                    |           |            |        |               |   |
|---------------|---|-----------|-----------|---------|--------------------|-----------|------------|--------|---------------|---|
| AG.CT         | 9 | 102776582 | 102776596 | 7.5     | ENSSSCT00000016766 | CROT      | intron     | .      | rs787370890   | 2 |
| AAC.GTT       | 9 | 102807311 | 102807328 | 6       | .                  | .         | intergenic | .      | 300988 rs7898 | 3 |
| AG.CT         | 9 | 102840401 | 102840410 | 5       | .                  | .         | intergenic | .      | rs793603397   | 2 |
| AAAT.ATTT     | 9 | 102872469 | 102872493 | 6.25    | ENSSSCT00000026505 | TMEM243   | promoter   | -0.005 | rs787331612   | 2 |
| AAAC.GTTT     | 9 | 103136055 | 103136078 | 6       | ENSSSCT00000016769 | KIAA1324L | intron     | 0.044  | rs790783040   | 2 |
| AT.AT         | 9 | 103162818 | 103162827 | 5       | ENSSSCT00000016769 | KIAA1324L | intron     | 0.042  | .             | 3 |
| AAAC.GTTT     | 9 | 103240726 | 103240744 | 4.75    | .                  | .         | intergenic | .      | rs789227469   | 2 |
| AT.AT         | 9 | 103322866 | 103322884 | 9.5     | .                  | .         | intergenic | 0.163  | 348654 rs7890 | 2 |
| AAAT.ATTT     | 9 | 103339650 | 103339665 | 4       | .                  | .         | intergenic | 0.147  | .             | 2 |
| AC.GT         | 9 | 104239688 | 104239707 | 10      | .                  | .         | intergenic | .      | 377315 rs7883 | 4 |
| AAAC.GTTT     | 9 | 104270351 | 104270370 | 5       | .                  | .         | intergenic | -0.079 | rs792914742   | 2 |
| AAAATT.AATTTT | 9 | 104724340 | 104724366 | 4.5     | .                  | .         | intergenic | .      | rs789990591   | 2 |
| ACAGC.GCTGT   | 9 | 104776819 | 104776836 | 3.6     | .                  | .         | intergenic | 0.613  | rs791546139   | 2 |
| AT.AT         | 9 | 104787195 | 104787204 | 5       | .                  | .         | intergenic | .      | .             | 2 |
| AAAC.GTTT     | 9 | 104973039 | 104973061 | 5.75    | .                  | .         | intergenic | -0.118 | rs788568658   | 2 |
| AAAAT.ATTTT   | 9 | 105174814 | 105174831 | 3.6     | .                  | .         | intergenic | -0.1   | rs793687633   | 2 |
| AT.AT         | 9 | 105249180 | 105249190 | 5.5     | .                  | .         | intergenic | 0.046  | rs793270941   | 2 |
| AAAC.GTTT     | 9 | 105414842 | 105414865 | 6       | .                  | .         | intergenic | .      | rs792718110   | 2 |
| AAAC.GTTT     | 9 | 105415109 | 105415129 | 5.25    | .                  | .         | intergenic | .      | 360358 rs7907 | 2 |
| AAAT.ATTT     | 9 | 105476909 | 105476930 | 5.5     | ENSSSCT00000016771 | SEMA3D    | intron     | 0.071  | rs792718382   | 2 |
| AC.GT         | 9 | 105519023 | 105519041 | 9.5     | ENSSSCT00000016771 | SEMA3D    | intron     | 0.556  | rs786705328   | 2 |
| AAAT.ATTT     | 9 | 105948548 | 105948562 | 3.75    | .                  | .         | intergenic | .      | .             | 2 |
| AAAG.CTTT     | 9 | 105961919 | 105961936 | 4.5     | .                  | .         | intergenic | -0.198 | rs789802130   | 2 |
| AAAT.ATTT     | 9 | 105964122 | 105964154 | 8.25    | .                  | .         | intergenic | -0.01  | 349601 rs7882 | 2 |
| AAAAC.GTTTT   | 9 | 106104161 | 106104198 | 7.6     | .                  | .         | intergenic | 0.183  | rs789247435   | 2 |
| AAAAC.GTTTT   | 9 | 106345615 | 106345630 | 3.2     | .                  | .         | intergenic | 0.051  | rs788809051   | 2 |
| AC.GT         | 9 | 106787296 | 106787310 | 7.5     | .                  | .         | intergenic | 0.103  | .             | 3 |
| AAAT.ATTT     | 9 | 106848109 | 106848128 | 5       | .                  | .         | intergenic | 0.22   | rs787448756   | 2 |
| AAAAC.GTTTT   | 9 | 106862128 | 106862145 | 3.6     | .                  | .         | intergenic | -0.16  | 253291 rs7884 | 2 |
| AAAAC.GTTTT   | 9 | 107026829 | 107026854 | 5.2     | ENSSSCT00000016774 | SEMA3E    | intron     | 0.161  | rs792290526   | 2 |
| AT.AT         | 9 | 107105502 | 107105528 | 13.5    | ENSSSCT00000016774 | SEMA3E    | intron     | -0.049 | rs789085396   | 2 |
| AGAT.ATCT     | 9 | 107149659 | 107149690 | 8       | .                  | .         | intergenic | .      | 351065 rs7880 | 2 |
| AT.AT         | 9 | 107214626 | 107214635 | 5       | .                  | .         | intergenic | -0.078 | rs790558264   | 4 |
| AC.GT         | 9 | 107295342 | 107295351 | 5       | .                  | .         | intergenic | -0.061 | rs712127363   | 3 |
| AAAC.GTTT     | 9 | 107378876 | 107378893 | 4.5     | ENSSSCT00000016776 | PCLO      | intron     | -0.026 | rs787365383   | 2 |
| AAAC.GTTT     | 9 | 107378876 | 107378893 | 4.5     | ENSSSCT00000025400 | PCLO      | intron     | -0.026 | rs787365383   | 2 |
| AAAC.GTTT     | 9 | 107378876 | 107378893 | 4.5     | ENSSSCT00000027728 | PCLO      | intron     | -0.026 | rs787365383   | 2 |
| AATG.CATT     | 9 | 107466687 | 107466727 | 10.25   | ENSSSCT00000016776 | PCLO      | intron     | 0.112  | 775943 rs7907 | 3 |
| AATG.CATT     | 9 | 107466687 | 107466727 | 10.25   | ENSSSCT00000025400 | PCLO      | intron     | 0.112  | 775943 rs7907 | 3 |
| AATG.CATT     | 9 | 107466687 | 107466727 | 10.25   | ENSSSCT00000027728 | PCLO      | intron     | 0.112  | 775943 rs7907 | 3 |
| AATC.GATT     | 9 | 107478072 | 107478090 | 4.75    | ENSSSCT00000025400 | PCLO      | intron     | -0.077 | rs791461415   | 2 |
| AATC.GATT     | 9 | 107478072 | 107478090 | 4.75    | ENSSSCT00000027728 | PCLO      | intron     | -0.077 | rs791461415   | 2 |
| AATC.GATT     | 9 | 107478072 | 107478090 | 4.75    | ENSSSCT00000016776 | PCLO      | intron     | -0.077 | rs791461415   | 2 |
| AAAT.ATTT     | 9 | 107638010 | 107638024 | 3.75    | ENSSSCT00000016776 | PCLO      | intron     | 0.984  | rs790945519   | 2 |
| AAAT.ATTT     | 9 | 107638010 | 107638024 | 3.75    | ENSSSCT00000025400 | PCLO      | intron     | 0.984  | rs790945519   | 2 |
| AAAT.ATTT     | 9 | 107638010 | 107638024 | 3.75    | ENSSSCT00000027728 | PCLO      | intron     | 0.984  | rs790945519   | 2 |
| AG.CT         | 9 | 107724555 | 107724565 | 5.5     | ENSSSCT00000016776 | PCLO      | intron     | -0.189 | .             | 2 |
| AG.CT         | 9 | 107724555 | 107724565 | 5.5     | ENSSSCT00000025400 | PCLO      | intron     | -0.189 | .             | 2 |
| AG.CT         | 9 | 107724555 | 107724565 | 5.5     | ENSSSCT00000027728 | PCLO      | intron     | -0.189 | .             | 2 |
| AAAC.GTTT     | 9 | 108001608 | 108001626 | 4.75    | .                  | .         | intergenic | .      | 182214 rs7898 | 2 |
| AC.GT         | 9 | 108121058 | 108121070 | 6.5     | ENSSSCT00000016777 | CACNA2D1  | intron     | -0.136 | rs789478293   | 2 |
| AT.AT         | 9 | 108348579 | 108348602 | 12      | ENSSSCT00000016777 | CACNA2D1  | intron     | 0.178  | 371146 rs7889 | 2 |
| AG.CT         | 9 | 108355561 | 108355577 | 8.5     | ENSSSCT00000016777 | CACNA2D1  | intron     | -0.117 | 111204 rs7906 | 2 |
| AC.GT         | 9 | 108461001 | 108461017 | 8.5     | ENSSSCT00000016777 | CACNA2D1  | intron     | -0.057 | rs793693753   | 2 |
| AG.CT         | 9 | 108465182 | 108465203 | 11      | ENSSSCT00000016777 | CACNA2D1  | intron     | 0.031  | .             | 5 |
| AAAC.GTTT     | 9 | 108634993 | 108635012 | 5       | .                  | .         | intergenic | -0.12  | rs786668922   | 2 |
| AAT.ATT       | 9 | 108671795 | 108671811 | 5.66667 | .                  | .         | intergenic | 0.036  | rs792301533   | 2 |
| AAC.GTT       | 9 | 108675004 | 108675029 | 8.66667 | .                  | .         | intergenic | 0.062  | 188294 rs7877 | 2 |
| AG.CT         | 9 | 108753304 | 108753317 | 7       | .                  | .         | intergenic | -0.249 | rs793533320   | 2 |
| AAC.GTT       | 9 | 109037436 | 109037447 | 4       | .                  | .         | intergenic | 0.089  | rs792993297   | 2 |
| AAAG.CTTT     | 9 | 109244937 | 109244949 | 3.25    | .                  | .         | intergenic | .      | .             | 2 |
| AC.GT         | 9 | 109248571 | 109248582 | 6       | .                  | .         | intergenic | 0.081  | .             | 2 |
| AAC.GTT       | 9 | 109320519 | 109320532 | 4.66667 | .                  | .         | intergenic | .      | rs793511566   | 3 |
| ACAT.ATGT     | 9 | 109496277 | 109496316 | 10      | .                  | .         | intergenic | -0.141 | .             | 2 |
| AAAT.ATTT     | 9 | 109554243 | 109554259 | 4.25    | .                  | .         | intergenic | .      | rs792335298   | 2 |
| AAT.ATT       | 9 | 109556989 | 109557004 | 5.33333 | .                  | .         | intergenic | 0.266  | rs787494556   | 2 |
| AT.AT         | 9 | 109574148 | 109574157 | 5       | .                  | .         | intergenic | 0.046  | .             | 2 |
| AAAAT.ATTTT   | 9 | 109606739 | 109606768 | 6       | ENSSSCT00000016779 | .         | intron     | .      | .             | 2 |
| AAAC.GTTT     | 9 | 109674557 | 109674583 | 6.75    | ENSSSCT00000016779 | .         | intron     | -0.304 | rs787188557   | 2 |
| AAATC.GATTT   | 9 | 109768642 | 109768664 | 4.6     | .                  | .         | intergenic | -0.107 | rs792113163   | 2 |
| AT.AT         | 9 | 109808279 | 109808291 | 6.5     | .                  | .         | intergenic | 0.021  | rs791161182   | 2 |
| AC.GT         | 9 | 109872889 | 109872907 | 9.5     | .                  | .         | intergenic | .      | rs788057266   | 3 |
| AT.AT         | 9 | 110022962 | 110022979 | 9       | .                  | .         | intergenic | .      | rs789036241   | 2 |
| AGAT.ATCT     | 9 | 110280360 | 110280383 | 6       | ENSSSCT00000016781 | GNAT3     | promoter   | 0.178  | 394677 rs7872 | 5 |
| AAC.GTT       | 9 | 110317908 | 110317924 | 5.66667 | ENSSSCT00000016781 | GNAT3     | intron     | 1.482  | rs790361978   | 4 |
| AAAT.ATTT     | 9 | 110391209 | 110391228 | 5       | .                  | .         | intergenic | 0.141  | 751955 rs7913 | 2 |
| AC.GT         | 9 | 110461441 | 110461461 | 10.5    | .                  | .         | intergenic | 0.034  | .             | 2 |
| AAAG.CTTT     | 9 | 110805712 | 110805732 | 5.25    | .                  | .         | intergenic | .      | rs789836680   | 2 |
| AG.CT         | 9 | 110829433 | 110829454 | 11      | .                  | .         | intergenic | .      | rs791054338   | 2 |
| AC.GT         | 9 | 111029645 | 111029676 | 16      | .                  | .         | intergenic | .      | rs695270297   | 4 |
| AT.AT         | 9 | 111056016 | 111056026 | 5.5     | .                  | .         | intergenic | -0.129 | rs788158050   | 4 |
| AAC.GTT       | 9 | 111081517 | 111081535 | 6.33333 | .                  | .         | intergenic | .      | rs792045822   | 2 |
| AC.GT         | 9 | 111196147 | 111196157 | 5.5     | .                  | .         | intergenic | 0.116  | rs790128306   | 2 |
| AAAT.ATTT     | 9 | 111366217 | 111366240 | 6       | .                  | .         | intergenic | -0.057 | .             | 2 |

|             |   |           |           |         |                    |          |            |        |               |   |
|-------------|---|-----------|-----------|---------|--------------------|----------|------------|--------|---------------|---|
| AT.AT       | 9 | 111551267 | 111551284 | 9       | .                  | .        | intergenic | 0.029  | rs788081815   | 2 |
| AAAAC.GTTTT | 9 | 111603527 | 111603543 | 3.4     | .                  | .        | intergenic | 0.134  | rs789760632   | 2 |
| AT.AT       | 9 | 111852487 | 111852502 | 8       | .                  | .        | intergenic | 0.037  | .             | 3 |
| AC.GT       | 9 | 111993712 | 111993737 | 13      | .                  | .        | intergenic | 0.012  | rs790843149   | 3 |
| AT.AT       | 9 | 112139058 | 112139069 | 6       | .                  | .        | intergenic | .      | rs789095120   | 2 |
| AC.GT       | 9 | 112331898 | 112331910 | 6.5     | .                  | .        | intergenic | 0.035  | 370691 rs7880 | 2 |
| AAAC.GTTT   | 9 | 112527926 | 112527949 | 6       | .                  | .        | intergenic | 0.33   | 374366 rs7930 | 2 |
| AT.AT       | 9 | 112618603 | 112618625 | 11.5    | ENSSSCT00000023465 | .        | intron     | -0.048 | rs789069308   | 2 |
| ATCC.GGAT   | 9 | 112629570 | 112629587 | 4.5     | ENSSSCT00000023465 | .        | intron     | 0.026  | 391722 rs7913 | 2 |
| AT.AT       | 9 | 112800453 | 112800472 | 10      | ENSSSCT00000016785 | PHTF2    | intron     | 0.232  | rs787593832   | 2 |
| AT.AT       | 9 | 112934143 | 112934158 | 8       | ENSSSCT00000016786 | PTPN12   | intron     | .      | .             | 2 |
| AC.GT       | 9 | 112948564 | 112948578 | 7.5     | ENSSSCT00000016786 | PTPN12   | intron     | 0.259  | rs788364518   | 2 |
| AAAAC.GTTTT | 9 | 112984556 | 112984584 | 5.8     | .                  | .        | intergenic | .      | rs793686386   | 2 |
| ATC.GAT     | 9 | 113254398 | 113254409 | 4       | ENSSSCT00000021410 | U6       | promoter   | 0.168  | rs789410460   | 2 |
| AAAAT.ATTTT | 9 | 113279212 | 113279230 | 3.8     | ENSSSCT00000016789 | FAM185A  | intron     | 0.796  | rs790606571   | 2 |
| AGG.CCT     | 9 | 113963908 | 113963919 | 4       | ENSSSCT00000016801 | DNAJC2   | intron     | -0.024 | .             | 3 |
| AAAAC.GTTTT | 9 | 114042552 | 114042579 | 4.66667 | .                  | .        | intergenic | 0.145  | rs790447274   | 2 |
| AT.AT       | 9 | 114139764 | 114139774 | 5.5     | ENSSSCT00000016805 | RELN     | intron     | 0.55   | .             | 3 |
| AAAT.ATTT   | 9 | 114475763 | 114475777 | 3.75    | .                  | .        | intergenic | 0.213  | .             | 4 |
| AAAAT.ATTTT | 9 | 114484669 | 114484684 | 3.2     | .                  | .        | intergenic | 0.201  | rs786256585   | 2 |
| AC.GT       | 9 | 114652719 | 114652731 | 6.5     | .                  | .        | intergenic | -0.022 | rs709426894   | 2 |
| AAC.GTT     | 9 | 114737886 | 114737919 | 11.3333 | .                  | .        | intergenic | .      | rs788333118   | 2 |
| AATG.CATT   | 9 | 114793222 | 114793251 | 7.5     | .                  | .        | intergenic | 0.177  | .             | 2 |
| AACAC.GTGT  | 9 | 114870383 | 114870398 | 3.2     | ENSSSCT00000016806 | ORC5     | intron     | -0.124 | .             | 2 |
| AT.AT       | 9 | 115084766 | 115084775 | 5       | .                  | .        | intergenic | 0.234  | 182433 rs7887 | 3 |
| AAAAC.GTTTT | 9 | 115130564 | 115130592 | 4.83333 | .                  | .        | intergenic | 0.261  | rs788514809   | 2 |
| AAC.GTT     | 9 | 115213371 | 115213386 | 5.33333 | .                  | .        | intergenic | 0.18   | rs788985894   | 2 |
| AAAAT.ATTTT | 9 | 115360703 | 115360720 | 3.6     | .                  | .        | intergenic | -0.009 | 307382 rs7931 | 2 |
| AAC.GTT     | 9 | 115738369 | 115738396 | 9.33333 | ENSSSCT00000032237 | SRPK2    | intron     | .      | rs788424450   | 2 |
| AC.GT       | 9 | 115939535 | 115939548 | 7       | .                  | .        | intergenic | 0.146  | rs787128875   | 4 |
| AT.AT       | 9 | 115954396 | 115954407 | 6       | .                  | .        | intergenic | .      | .             | 4 |
| AAAT.ATTT   | 9 | 116382157 | 116382174 | 4.5     | ENSSSCT00000016812 | ATXN7L1  | intron     | .      | 780155 rs7907 | 2 |
| AGGG.CCCT   | 9 | 116611000 | 116611014 | 3.75    | .                  | .        | intergenic | -0.206 | rs792500736   | 2 |
| AC.GT       | 9 | 116627938 | 116627949 | 6       | ENSSSCT00000022799 | .        | intron     | -0.298 | 160218 rs7935 | 2 |
| AC.GT       | 9 | 116731437 | 116731446 | 5       | ENSSSCT00000016813 | .        | intron     | -0.053 | rs788102530   | 2 |
| AAAAC.GTTTT | 9 | 116761275 | 116761300 | 5.2     | .                  | .        | intergenic | -0.175 | 179530 rs7911 | 2 |
| AAAT.ATTT   | 9 | 116785251 | 116785286 | 9       | .                  | .        | intergenic | .      | rs788385082   | 2 |
| ATCTC.GAGAT | 9 | 116966742 | 116966763 | 3.66667 | .                  | .        | intergenic | .      | 223735 rs7894 | 2 |
| AATT.AATT   | 9 | 117049078 | 117049101 | 6       | .                  | .        | intergenic | 0.03   | 787444 rs7927 | 2 |
| AAC.GTT     | 9 | 117065911 | 117065933 | 7.66667 | .                  | .        | intergenic | 0.034  | rs793702489   | 3 |
| AC.GT       | 9 | 117075630 | 117075639 | 5       | .                  | .        | intergenic | -0.064 | .             | 4 |
| AAC.GTT     | 9 | 117280958 | 117280971 | 4.66667 | .                  | .        | intergenic | 0.202  | rs790192950   | 2 |
| AG.CT       | 9 | 117293469 | 117293484 | 8       | .                  | .        | intergenic | -0.056 | rs787374223   | 2 |
| AC.GT       | 9 | 117361566 | 117361578 | 6.5     | .                  | .        | intergenic | 0.156  | rs793589464   | 4 |
| AC.GT       | 9 | 117446409 | 117446419 | 5.5     | .                  | .        | intergenic | 0.174  | .             | 4 |
| AAG.CTT     | 9 | 117761212 | 117761225 | 4.66667 | .                  | .        | intergenic | -0.077 | .             | 3 |
| AAG.CTT     | 9 | 118184124 | 118184135 | 4       | .                  | .        | intergenic | 0.186  | 700367 rs7887 | 2 |
| AC.GT       | 9 | 118273475 | 118273489 | 7.5     | ENSSSCT00000031097 | .        | intron     | 0.116  | rs790559662   | 2 |
| ACAT.ATGT   | 9 | 118587904 | 118587918 | 3.75    | .                  | .        | intergenic | 0.197  | .             | 2 |
| AAAAG.CTTTT | 9 | 118639713 | 118639736 | 4       | .                  | .        | intergenic | 0.039  | rs791529141   | 2 |
| AAAT.ATTT   | 9 | 118671864 | 118671881 | 4.5     | .                  | .        | intergenic | 0.046  | rs790752147   | 2 |
| AG.CT       | 9 | 118672390 | 118672404 | 7.5     | .                  | .        | intergenic | 0.07   | .             | 2 |
| AAC.GTT     | 9 | 118698801 | 118698824 | 8       | .                  | .        | intergenic | -0.114 | rs790392335   | 5 |
| AC.GT       | 9 | 118711950 | 118711963 | 7       | .                  | .        | intergenic | 0.012  | 374415 rs7920 | 3 |
| AAC.GTT     | 9 | 119125717 | 119125730 | 4.66667 | ENSSSCT00000016830 | NME8     | intron     | .      | rs789641623   | 2 |
| AC.GT       | 9 | 119399924 | 119399940 | 8.5     | .                  | .        | intergenic | 0.123  | .             | 3 |
| AG.CT       | 9 | 119560200 | 119560217 | 9       | ENSSSCT00000029694 | .        | intron     | 0.687  | 363699 rs7919 | 2 |
| AG.CT       | 9 | 119560200 | 119560217 | 9       | ENSSSCT00000029130 | STARD3NL | intron     | 0.687  | 363699 rs7919 | 2 |
| AAAC.GTTT   | 9 | 119756493 | 119756504 | 3       | .                  | .        | intergenic | -0.007 | rs789934354   | 2 |
| AAAG.CTTT   | 9 | 119931116 | 119931128 | 3.25    | .                  | .        | intergenic | .      | rs789802949   | 2 |
| AAAAC.GTTTT | 9 | 120148551 | 120148573 | 3.83333 | .                  | .        | intergenic | .      | 148403 rs7919 | 2 |
| AAAT.ATTT   | 9 | 120161309 | 120161325 | 4.25    | ENSSSCT00000031790 | ZNF425   | intron     | 0.207  | rs792769207   | 2 |
| AAC.GTT     | 9 | 120188788 | 120188801 | 4.66667 | .                  | .        | intergenic | .      | 374570 rs7877 | 2 |
| ACGC.GCGT   | 9 | 120210117 | 120210134 | 4.5     | ENSSSCT00000016835 | PDIA4    | intron     | -0.307 | rs792631106   | 2 |
| AT.AT       | 9 | 120362600 | 120362611 | 6       | ENSSSCT00000023706 | EZH2     | intron     | 0.175  | 319465 rs7893 | 2 |
| AAAAC.GTTTT | 9 | 120428972 | 120429004 | 6.6     | ENSSSCT00000016837 | CUL1     | intron     | 0.009  | rs790429663   | 2 |
| AT.AT       | 9 | 120482483 | 120482495 | 6.5     | ENSSSCT00000031913 | .        | promoter   | -0.073 | rs788074391   | 3 |
| AT.AT       | 9 | 120891798 | 120891808 | 5.5     | ENSSSCT00000026150 | CNTNAP2  | intron     | -0.124 | rs793714400   | 2 |
| AC.GT       | 9 | 120915591 | 120915615 | 12.5    | .                  | .        | intergenic | -0.087 | rs793388199   | 2 |
| AT.AT       | 9 | 120925061 | 120925085 | 12.5    | .                  | .        | intergenic | -0.031 | .             | 2 |
| AG.CT       | 9 | 120975017 | 120975030 | 7       | .                  | .        | intergenic | 0.214  | .             | 4 |
| AC.GT       | 9 | 121114399 | 121114411 | 6.5     | ENSSSCT00000016840 | .        | intron     | 0.019  | rs788682422   | 2 |
| AAAC.GTTT   | 9 | 121317206 | 121317226 | 5.25    | .                  | .        | intergenic | .      | 387137 rs7909 | 2 |
| AG.CT       | 9 | 121337217 | 121337229 | 6.5     | .                  | .        | intergenic | 0.611  | 326691 rs7894 | 2 |
| AAAC.GTTT   | 9 | 121369068 | 121369095 | 7       | .                  | .        | intergenic | -0.068 | rs793876919   | 2 |
| AC.GT       | 9 | 121499774 | 121499792 | 9.5     | .                  | .        | intergenic | 0.061  | rs791322188   | 6 |
| AAAT.ATTT   | 9 | 121519107 | 121519130 | 6       | .                  | .        | intergenic | -0.136 | 120364 rs7930 | 2 |
| AC.GT       | 9 | 121533703 | 121533715 | 6.5     | .                  | .        | intergenic | -0.15  | .             | 4 |
| AAAC.GTTT   | 9 | 121713227 | 121713245 | 4.75    | .                  | .        | intergenic | -0.126 | rs792803802   | 2 |
| AAAG.CTTT   | 9 | 121756397 | 121756420 | 6       | .                  | .        | intergenic | -0.162 | rs791985956   | 2 |
| AT.AT       | 9 | 121785918 | 121785929 | 6       | ENSSSCT00000024740 | .        | promoter   | -0.102 | rs788530476   | 2 |
| AG.CT       | 9 | 121828819 | 121828837 | 9.5     | .                  | .        | intergenic | -0.131 | rs787115525   | 3 |
| AAG.CTT     | 9 | 121879046 | 121879077 | 10.6667 | .                  | .        | intergenic | .      | rs788480384   | 2 |
| AAAG.CTTT   | 9 | 121894402 | 121894425 | 6       | .                  | .        | intergenic | .      | rs789279615   | 2 |



|             |   |           |           |         |                    |        |            |        |               |   |
|-------------|---|-----------|-----------|---------|--------------------|--------|------------|--------|---------------|---|
| AC.GT       | 9 | 121898766 | 121898777 | 6       | .                  | .      | intergenic | 0.015  | 306042 rs7899 | 4 |
| AC.GT       | 9 | 121954245 | 121954261 | 8.5     | ENSSSCT00000016843 | .      | promoter   | -0.062 | rs790176232   | 2 |
| AAAC.GTTT   | 9 | 122169500 | 122169535 | 9       | .                  | .      | intergenic | -0.327 | rs705930507   | 3 |
| AG.CT       | 9 | 122191020 | 122191044 | 12.5    | .                  | .      | intergenic | -0.141 | 103164 rs7868 | 2 |
| AG.CT       | 9 | 122282415 | 122282425 | 5.5     | .                  | .      | intergenic | 0.119  | .             | 3 |
| AAAC.GTTT   | 9 | 122373987 | 122374006 | 5       | .                  | .      | intergenic | -0.293 | rs789505205   | 2 |
| AT.AT       | 9 | 122552454 | 122552467 | 7       | .                  | .      | intergenic | -0.403 | 355443 rs7911 | 3 |
| AAAC.GTTT   | 9 | 122652997 | 122653018 | 5.5     | .                  | .      | intergenic | .      | rs790526818   | 4 |
| AG.CT       | 9 | 122676302 | 122676312 | 5.5     | .                  | .      | intergenic | -0.103 | rs787609783   | 2 |
| AG.CT       | 9 | 122834528 | 122834550 | 11.5    | .                  | .      | intergenic | -0.122 | .             | 4 |
| AG.CT       | 9 | 123050339 | 123050349 | 5.5     | .                  | .      | intergenic | -0.046 | rs790663179   | 2 |
| AAAG.CTTT   | 9 | 123073209 | 123073227 | 4.75    | .                  | .      | intergenic | .      | rs788642985   | 2 |
| AAAC.GTTT   | 9 | 123117940 | 123117982 | 10.75   | .                  | .      | intergenic | 0      | rs792722862   | 2 |
| AG.CT       | 9 | 123279709 | 123279728 | 10      | .                  | .      | intergenic | -0.287 | 389647 rs7917 | 2 |
| AAGG.CCTT   | 9 | 123298824 | 123298868 | 11.25   | .                  | .      | intergenic | -0.265 | rs789178775   | 2 |
| AAAC.GTTT   | 9 | 123517703 | 123517724 | 5.5     | .                  | .      | intergenic | 0.291  | rs789920018   | 2 |
| AAAT.ATTT   | 9 | 123542879 | 123542904 | 6.5     | .                  | .      | intergenic | 0.189  | rs791610430   | 2 |
| AT.AT       | 9 | 123553718 | 123553730 | 6.5     | .                  | .      | intergenic | 0.174  | 337701 rs7928 | 2 |
| AC.GT       | 9 | 123602640 | 123602650 | 5.5     | .                  | .      | intergenic | .      | rs792840363   | 2 |
| AAAC.GTTT   | 9 | 123695790 | 123695816 | 6.75    | .                  | .      | intergenic | -0.185 | rs788386582   | 2 |
| AT.AT       | 9 | 123746826 | 123746836 | 5.5     | .                  | .      | intergenic | -0.051 | .             | 4 |
| AC.GT       | 9 | 123971705 | 123971715 | 5.5     | .                  | .      | intergenic | -0.085 | .             | 2 |
| AAAC.GTTT   | 9 | 124222416 | 124222432 | 4.25    | .                  | .      | intergenic | 0.285  | rs790764761   | 2 |
| AAAG.CTTT   | 9 | 124229324 | 124229340 | 4.25    | .                  | .      | intergenic | 0.247  | .             | 2 |
| AT.AT       | 9 | 124248102 | 124248119 | 9       | .                  | .      | intergenic | 0.1    | rs790253409   | 2 |
| AAC.GTT     | 9 | 124594839 | 124594852 | 4.66667 | ENSSSCT00000016844 | TPK1   | intron     | -0.119 | 783643 rs7922 | 2 |
| AGG.CCT     | 9 | 124640323 | 124640334 | 4       | .                  | .      | intergenic | .      | rs792939018   | 2 |
| AC.GT       | 9 | 124823055 | 124823071 | 8.5     | ENSSSCT00000022548 | .      | promoter   | .      | .             | 3 |
| AAAAC.GTTTT | 9 | 124872607 | 124872635 | 4.83333 | .                  | .      | intergenic | .      | .             | 3 |
| AAG.CTT     | 9 | 124876347 | 124876360 | 4.66667 | .                  | .      | intergenic | -0.564 | rs789303023   | 2 |
| AT.AT       | 9 | 124922610 | 124922619 | 5       | .                  | .      | intergenic | .      | rs787799576   | 2 |
| AAAG.CTTT   | 9 | 125043128 | 125043147 | 5       | .                  | .      | intergenic | .      | rs790042659   | 2 |
| AAAAC.GTTTT | 9 | 125059094 | 125059118 | 5       | .                  | .      | intergenic | .      | rs791523956   | 2 |
| AG.CT       | 9 | 125100348 | 125100357 | 5       | ENSSSCT00000016855 | .      | intron     | .      | rs792708238   | 2 |
| AG.CT       | 9 | 125100348 | 125100357 | 5       | ENSSSCT00000016854 | .      | intron     | .      | rs792708238   | 2 |
| AAAC.GTTT   | 9 | 125346699 | 125346725 | 6.75    | ENSSSCT00000016859 | CHI3L1 | intron     | .      | 120699 rs7896 | 2 |
| AAAC.GTTT   | 9 | 125346699 | 125346725 | 6.75    | ENSSSCT00000036518 | CHI3L1 | intron     | .      | 120699 rs7896 | 2 |
| ATC.GAT     | 9 | 125365020 | 125365035 | 5.33333 | .                  | .      | intergenic | -0.003 | rs791324870   | 2 |
| AAAC.GTTT   | 9 | 125594569 | 125594585 | 4.25    | .                  | .      | intergenic | .      | rs789946925   | 2 |
| AAG.CTT     | 9 | 125623365 | 125623381 | 5.66667 | ENSSSCT00000016865 | VAMP4  | intron     | 0.5    | 722354 rs7865 | 2 |
| AAAC.GTTT   | 9 | 125688493 | 125688515 | 5.75    | .                  | .      | intergenic | -0.143 | rs787056589   | 3 |
| AG.CT       | 9 | 125849176 | 125849188 | 6.5     | .                  | .      | intergenic | -0.206 | rs790623506   | 4 |
| AC.GT       | 9 | 126082907 | 126082919 | 6.5     | .                  | .      | intergenic | .      | rs791095952   | 2 |
| AAAC.GTTT   | 9 | 126088146 | 126088167 | 5.5     | .                  | .      | intergenic | 0.17   | rs791585137   | 2 |
| AAC.GTT     | 9 | 126209748 | 126209765 | 6       | .                  | .      | intergenic | 0.885  | rs694781134   | 3 |
| AAAAC.GTTTT | 9 | 126270451 | 126270479 | 5.8     | ENSSSCT00000028491 | .      | intron     | -0.028 | rs788801237   | 2 |
| AATG.CATT   | 9 | 126455471 | 126455489 | 4.75    | .                  | .      | intergenic | 0.116  | .             | 2 |
| AAAC.GTTT   | 9 | 126581533 | 126581561 | 7.25    | ENSSSCT00000016869 | .      | intron     | 0.153  | 387172 rs7907 | 2 |
| AC.GT       | 9 | 126672946 | 126672956 | 5.5     | .                  | .      | intergenic | 0.196  | .             | 2 |
| AAAT.ATTT   | 9 | 127104925 | 127104943 | 4.75    | .                  | .      | intergenic | .      | rs792316973   | 2 |
| AAAT.ATTT   | 9 | 127136038 | 127136052 | 3.75    | .                  | .      | intergenic | -0.23  | rs787048313   | 2 |
| AC.GT       | 9 | 127426556 | 127426581 | 13      | .                  | .      | intergenic | 0.008  | 343482 rs7880 | 4 |
| AAATT.AATTT | 9 | 127480995 | 127481010 | 3.2     | .                  | .      | intergenic | .      | rs789967989   | 3 |
| AAAG.CTTT   | 9 | 127495618 | 127495629 | 3       | ENSSSCT00000028213 | PRDX6  | intron     | 1.855  | rs793088164   | 2 |
| AAAC.GTTT   | 9 | 127517766 | 127517780 | 3.75    | ENSSSCT00000016873 | SLC9C2 | intron     | 0.176  | rs787564387   | 2 |
| AG.CT       | 9 | 127624077 | 127624086 | 5       | .                  | .      | intergenic | 0.18   | .             | 2 |
| AAAT.ATTT   | 9 | 127700478 | 127700501 | 6       | ENSSSCT00000016882 | KLHL20 | intron     | 0.294  | rs788240629   | 2 |
| AG.CT       | 9 | 127757181 | 127757190 | 5       | ENSSSCT00000016876 | DARS2  | intron     | 0.049  | .             | 4 |
| AAGT.ACTT   | 9 | 127895282 | 127895312 | 7.75    | ENSSSCT00000016884 | RC3H1  | intron     | .      | 339617 rs7922 | 2 |
| AAAAG.CTTTT | 9 | 127965187 | 127965210 | 4.8     | .                  | .      | intergenic | 0.193  | rs793540457   | 2 |
| ACAG.CTGT   | 9 | 128032636 | 128032666 | 7.75    | .                  | .      | intergenic | 0.055  | .             | 4 |
| ATCG.CGAT   | 9 | 128128125 | 128128145 | 5.25    | ENSSSCT00000016886 | .      | intron     | 0.196  | rs792938907   | 2 |
| AAAAC.GTTTT | 9 | 128406912 | 128406938 | 5.4     | .                  | .      | intergenic | 0.095  | rs790212073   | 2 |
| AC.GT       | 9 | 128413324 | 128413342 | 9.5     | .                  | .      | intergenic | .      | rs786432582   | 3 |
| ACAT.ATGT   | 9 | 129172131 | 129172151 | 5.25    | ENSSSCT00000016895 | TNR    | intron     | 0.059  | .             | 2 |
| AATAT.ATATT | 9 | 129263767 | 129263783 | 3.4     | .                  | .      | intergenic | 0.113  | rs787490616   | 2 |
| AAAC.GTTT   | 9 | 129406015 | 129406033 | 4.75    | .                  | .      | intergenic | -0.303 | rs793558438   | 2 |
| AAAAC.GTTTT | 9 | 129533020 | 129533041 | 3.66667 | .                  | .      | intergenic | .      | 382912 rs7916 | 2 |
| AATG.CATT   | 9 | 129589500 | 129589524 | 6.25    | .                  | .      | intergenic | 0.08   | 338454 rs7912 | 3 |
| AC.GT       | 9 | 129692484 | 129692508 | 12.5    | ENSSSCT00000016896 | .      | intron     | 0.129  | 327965 rs7906 | 4 |
| AAAC.GTTT   | 9 | 129761018 | 129761038 | 5.25    | ENSSSCT00000016896 | .      | intron     | 0.252  | rs788606098   | 2 |
| AAAAG.CTTTT | 9 | 129971946 | 129971969 | 4.8     | .                  | .      | intergenic | .      | rs793507808   | 2 |
| AC.GT       | 9 | 130141729 | 130141744 | 8       | ENSSSCT00000016899 | PAPPA2 | intron     | 0.101  | rs789643509   | 2 |
| AT.AT       | 9 | 130214418 | 130214430 | 6.5     | ENSSSCT00000016899 | PAPPA2 | intron     | 0.09   | rs710085081   | 4 |
| AT.AT       | 9 | 130569982 | 130570001 | 10      | ENSSSCT00000026733 | ASTN1  | intron     | -0.031 | rs792936491   | 2 |
| AT.AT       | 9 | 130594623 | 130594645 | 11.5    | ENSSSCT00000026733 | ASTN1  | intron     | -0.044 | rs790363249   | 2 |
| ATC.GAT     | 9 | 130618018 | 130618035 | 6       | ENSSSCT00000026733 | ASTN1  | intron     | 0.01   | rs791320565   | 2 |
| AGG.CCT     | 9 | 130721585 | 130721601 | 5.66667 | .                  | .      | intergenic | -0.18  | .             | 2 |
| AG.CT       | 9 | 130787839 | 130787848 | 5       | ENSSSCT00000016902 | BRINP2 | intron     | .      | rs788410792   | 2 |
| AAAAT.ATTTT | 9 | 130892330 | 130892346 | 3.4     | .                  | .      | intergenic | 0.379  | rs791896726   | 2 |
| AAC.GTT     | 9 | 131092030 | 131092051 | 7.33333 | .                  | .      | intergenic | .      | rs791290753   | 4 |
| AAC.GTT     | 9 | 131390568 | 131390583 | 5.33333 | .                  | .      | intergenic | 0.569  | 317671 rs7912 | 2 |
| AGG.CCT     | 9 | 131503482 | 131503495 | 4.66667 | ENSSSCT00000031105 | .      | intron     | 0.273  | rs790986375   | 2 |
| AC.GT       | 9 | 131662068 | 131662082 | 7.5     | .                  | .      | intergenic | .      | rs793777266   | 2 |

|             |   |           |           |         |                    |          |            |        |             |   |
|-------------|---|-----------|-----------|---------|--------------------|----------|------------|--------|-------------|---|
| AC.GT       | 9 | 131710606 | 131710617 | 6       | ENSSSCT00000016906 | RASAL2   | intron     | .      | rs792433811 | 3 |
| AC.GT       | 9 | 131710606 | 131710617 | 6       | ENSSSCT00000032575 | RASAL2   | intron     | .      | rs792433811 | 3 |
| AGGG.CCCT   | 9 | 131888400 | 131888413 | 3.5     | ENSSSCT00000016906 | RASAL2   | intron     | .      | .           | 2 |
| AGGG.CCCT   | 9 | 131888400 | 131888413 | 3.5     | ENSSSCT00000032575 | RASAL2   | intron     | .      | .           | 2 |
| AAAAT.ATTTT | 9 | 131993180 | 131993200 | 4.2     | ENSSSCT00000016906 | RASAL2   | intron     | 0.293  | rs792281163 | 2 |
| AAAAT.ATTTT | 9 | 131993180 | 131993200 | 4.2     | ENSSSCT00000032575 | RASAL2   | intron     | 0.293  | rs792281163 | 2 |
| AG.CT       | 9 | 132269341 | 132269357 | 8.5     | ENSSSCT00000026955 | RALGPS2  | intron     | .      | rs694828370 | 5 |
| AAAAT.ATTTT | 9 | 132341503 | 132341528 | 5.2     | ENSSSCT00000016910 | .        | intron     | .      | .           | 2 |
| AAAC.GTTT   | 9 | 132376655 | 132376692 | 9.5     | ENSSSCT00000016910 | .        | intron     | .      | rs787546904 | 2 |
| AC.GT       | 9 | 132655792 | 132655804 | 6.5     | ENSSSCT00000016913 | TOR3A    | intron     | -0.296 | rs793602355 | 2 |
| AAAC.GTTT   | 9 | 132742961 | 132742972 | 3       | ENSSSCT00000027500 | ABL2     | intron     | 0.064  | rs788220721 | 2 |
| AAAAC.GTTT  | 9 | 132860030 | 132860049 | 4       | ENSSSCT00000016916 | AXDND1   | intron     | 0.178  | rs78777     | 2 |
| AG.CT       | 9 | 132950975 | 132950984 | 5       | ENSSSCT00000023854 | SOAT1    | intron     | 0.248  | .           | 2 |
| AAG.CTT     | 9 | 133134405 | 133134417 | 4.33333 | ENSSSCT00000016915 | TDRD5    | intron     | .      | rs7928      | 3 |
| AAG.CTT     | 9 | 133134405 | 133134417 | 4.33333 | ENSSSCT00000028228 | TDRD5    | intron     | .      | rs7928      | 3 |
| AC.GT       | 9 | 133171397 | 133171410 | 7       | .                  | .        | intergenic | 0.508  | .           | 2 |
| AAAAC.GTTT  | 9 | 133311571 | 133311591 | 3.5     | ENSSSCT00000030836 | .        | intron     | 0.412  | rs788544348 | 2 |
| AC.GT       | 9 | 133388792 | 133388801 | 5       | ENSSSCT00000023749 | .        | intron     | 0.259  | rs790727157 | 2 |
| AAAC.GTTT   | 9 | 133493299 | 133493321 | 5.75    | .                  | .        | intergenic | .      | rs7903      | 2 |
| AAAC.GTTT   | 9 | 133894693 | 133894716 | 6       | ENSSSCT00000016923 | ACBD6    | intron     | 0.103  | rs7927      | 2 |
| AC.GT       | 9 | 133911722 | 133911733 | 6       | ENSSSCT00000016923 | ACBD6    | intron     | 0.445  | rs791759072 | 4 |
| AT.AT       | 9 | 134030527 | 134030538 | 6       | .                  | .        | intergenic | .      | .           | 3 |
| AAAT.ATTT   | 9 | 134062558 | 134062578 | 5.25    | .                  | .        | intergenic | 0.095  | rs789011461 | 2 |
| AC.GT       | 9 | 134122745 | 134122757 | 6.5     | .                  | .        | intergenic | .      | .           | 3 |
| AAAAC.GTTT  | 9 | 134321229 | 134321252 | 4.8     | ENSSSCT00000016926 | XPR1     | intron     | .      | rs7938      | 2 |
| AAAC.GTTT   | 9 | 134667117 | 134667135 | 4.75    | .                  | .        | intergenic | 0.128  | rs791720802 | 2 |
| AAAC.GTTT   | 9 | 134809426 | 134809440 | 3.75    | .                  | .        | intergenic | 0.034  | rs7873      | 2 |
| AC.GT       | 9 | 134826512 | 134826522 | 5.5     | .                  | .        | intergenic | 0.131  | rs693101499 | 2 |
| AAC.GTT     | 9 | 134918748 | 134918763 | 5.33333 | .                  | .        | intergenic | 0.159  | rs791230030 | 2 |
| AG.CT       | 9 | 135129001 | 135129014 | 7       | ENSSSCT00000016932 | CACNA1E  | intron     | -0.06  | rs789282233 | 2 |
| AG.CT       | 9 | 135157218 | 135157233 | 8       | ENSSSCT00000016932 | CACNA1E  | intron     | 0.06   | rs704600815 | 2 |
| AAAAC.GTTT  | 9 | 135168156 | 135168180 | 5       | ENSSSCT00000016932 | CACNA1E  | intron     | .      | rs705395785 | 2 |
| AC.GT       | 9 | 135202849 | 135202885 | 18.5    | ENSSSCT00000016932 | CACNA1E  | intron     | 0.274  | rs788260281 | 3 |
| AC.GT       | 9 | 135301342 | 135301354 | 6.5     | ENSSSCT00000016932 | CACNA1E  | intron     | 0.004  | rs789862207 | 2 |
| AC.GT       | 9 | 135325888 | 135325900 | 6.5     | ENSSSCT00000016932 | CACNA1E  | intron     | 0.074  | rs7937      | 3 |
| AAAAC.GTTT  | 9 | 135467507 | 135467524 | 3.6     | ENSSSCT00000016932 | CACNA1E  | intron     | -0.199 | rs790689267 | 2 |
| ACACT.AGTGT | 9 | 135590696 | 135590713 | 3.6     | .                  | .        | intergenic | -0.095 | rs7073      | 2 |
| AAAT.ATTT   | 9 | 135650736 | 135650758 | 5.75    | .                  | .        | intergenic | -0.155 | rs789863966 | 2 |
| AAAT.ATTT   | 9 | 135662500 | 135662522 | 5.75    | .                  | .        | intergenic | 0.225  | rs7874      | 2 |
| AAG.CTT     | 9 | 135727976 | 135727989 | 4.66667 | .                  | .        | intergenic | 0.181  | rs790799410 | 2 |
| AT.AT       | 9 | 135744386 | 135744400 | 7.5     | .                  | .        | intergenic | 0.024  | rs792866142 | 2 |
| AG.CT       | 9 | 135789979 | 135789990 | 6       | .                  | .        | intergenic | -0.016 | rs787274031 | 3 |
| AAAAC.GTTT  | 9 | 136644996 | 136645022 | 4.5     | ENSSSCT00000016945 | LAMC1    | intron     | 0.449  | rs790902219 | 2 |
| AG.CT       | 9 | 136761963 | 136761978 | 8       | .                  | .        | intergenic | 0.025  | .           | 2 |
| AC.GT       | 9 | 136868007 | 136868017 | 5.5     | ENSSSCT00000016947 | NMNAT2   | intron     | 0.013  | .           | 5 |
| AAC.GTT     | 9 | 136876862 | 136876874 | 4.33333 | ENSSSCT00000016947 | NMNAT2   | intron     | -0.104 | rs793473525 | 2 |
| AG.CT       | 9 | 136928987 | 136928998 | 6       | ENSSSCT00000016947 | NMNAT2   | intron     | 0.06   | .           | 3 |
| AC.GT       | 9 | 136970300 | 136970312 | 6.5     | .                  | .        | intergenic | 0.439  | rs787185843 | 3 |
| AAAC.GTTT   | 9 | 137390700 | 137390714 | 3.75    | ENSSSCT00000016953 | RGL1     | intron     | .      | rs7915      | 2 |
| AG.CT       | 9 | 137545115 | 137545127 | 6.5     | ENSSSCT00000030440 | COLGALT2 | intron     | -0.006 | rs7917      | 2 |
| AT.AT       | 9 | 137591967 | 137591978 | 6       | ENSSSCT00000030440 | COLGALT2 | intron     | 0.193  | rs786864030 | 2 |
| ATCC.GGAT   | 9 | 137665189 | 137665204 | 4       | .                  | .        | intergenic | 0.045  | rs787112246 | 2 |
| AG.CT       | 9 | 137709043 | 137709057 | 7.5     | .                  | .        | intergenic | -0.056 | rs7920      | 2 |
| AG.CT       | 9 | 137796877 | 137796887 | 5.5     | .                  | .        | intergenic | 0.074  | rs793692290 | 2 |
| AAC.GTT     | 9 | 138086258 | 138086272 | 5       | ENSSSCT00000016955 | C1orf21  | intron     | 0.062  | rs791442412 | 3 |
| AGGC.CCCCT  | 9 | 138150918 | 138150932 | 3       | ENSSSCT00000016955 | C1orf21  | intron     | 0.133  | .           | 2 |
| AC.GT       | 9 | 138178014 | 138178024 | 5.5     | ENSSSCT00000016955 | C1orf21  | intron     | 0.036  | rs790664818 | 2 |
| AC.GT       | 9 | 138433510 | 138433531 | 11      | .                  | .        | intergenic | 0.077  | .           | 2 |
| AAAC.GTTT   | 9 | 138594675 | 138594694 | 5       | ENSSSCT00000035845 | FAM129A  | intron     | 0.045  | rs789732288 | 2 |
| AAAC.GTTT   | 9 | 138594675 | 138594694 | 5       | ENSSSCT00000032989 | FAM129A  | intron     | 0.045  | rs789732288 | 2 |
| AAAC.GTTT   | 9 | 138594675 | 138594694 | 5       | ENSSSCT00000016958 | FAM129A  | intron     | 0.045  | rs789732288 | 2 |
| AAAC.GTTT   | 9 | 138594675 | 138594694 | 5       | ENSSSCT00000036674 | FAM129A  | intron     | 0.045  | rs789732288 | 2 |
| AAAC.GTTT   | 9 | 138594675 | 138594694 | 5       | ENSSSCT00000034931 | FAM129A  | intron     | 0.045  | rs789732288 | 2 |
| AT.AT       | 9 | 138598829 | 138598840 | 6       | ENSSSCT00000035845 | FAM129A  | intron     | 0.407  | .           | 2 |
| AT.AT       | 9 | 138598829 | 138598840 | 6       | ENSSSCT00000032989 | FAM129A  | intron     | 0.407  | .           | 2 |
| AT.AT       | 9 | 138598829 | 138598840 | 6       | ENSSSCT00000016958 | FAM129A  | intron     | 0.407  | .           | 2 |
| AT.AT       | 9 | 138598829 | 138598840 | 6       | ENSSSCT00000036674 | FAM129A  | intron     | 0.407  | .           | 2 |
| AT.AT       | 9 | 138598829 | 138598840 | 6       | ENSSSCT00000034931 | FAM129A  | intron     | 0.407  | .           | 2 |
| AAT.ATT     | 9 | 138606455 | 138606471 | 5.66667 | ENSSSCT00000035845 | FAM129A  | intron     | 0.346  | .           | 2 |
| AAT.ATT     | 9 | 138606455 | 138606471 | 5.66667 | ENSSSCT00000032989 | FAM129A  | intron     | 0.346  | .           | 2 |
| AAT.ATT     | 9 | 138606455 | 138606471 | 5.66667 | ENSSSCT00000016958 | FAM129A  | intron     | 0.346  | .           | 2 |
| AAT.ATT     | 9 | 138606455 | 138606471 | 5.66667 | ENSSSCT00000036674 | FAM129A  | intron     | 0.346  | .           | 2 |
| AAT.ATT     | 9 | 138606455 | 138606471 | 5.66667 | ENSSSCT00000034931 | FAM129A  | intron     | 0.346  | .           | 2 |
| AAAC.GTTT   | 9 | 138623533 | 138623556 | 6       | .                  | .        | intergenic | .      | rs786768326 | 2 |
| AAT.ATT     | 9 | 139089627 | 139089638 | 4       | .                  | .        | intergenic | .      | .           | 2 |
| AG.CT       | 9 | 139139633 | 139139653 | 10.5    | .                  | .        | intergenic | 0.022  | rs7887      | 2 |
| AG.CT       | 9 | 139186960 | 139186977 | 9       | .                  | .        | intergenic | .      | rs791180569 | 2 |
| AAAT.ATTT   | 9 | 139304512 | 139304534 | 5.75    | .                  | .        | intergenic | 0.041  | rs7894      | 2 |
| AAAT.ATTT   | 9 | 139379329 | 139379343 | 3.75    | .                  | .        | intergenic | 0.091  | rs788526101 | 2 |
| AT.AT       | 9 | 139738315 | 139738334 | 10      | .                  | .        | intergenic | 0.032  | .           | 2 |
| AAC.GTT     | 9 | 139834025 | 139834041 | 5.66667 | .                  | .        | intergenic | 0.022  | rs792592227 | 3 |
| AAT.ATT     | 9 | 139964785 | 139964800 | 5.33333 | ENSSSCT00000016969 | TPR      | intron     | -0.003 | rs791991735 | 2 |
| AAG.CTT     | 9 | 139975191 | 139975203 | 4.33333 | ENSSSCT00000016969 | TPR      | intron     | -0.128 | rs7892      | 2 |
| AC.GT       | 9 | 139977728 | 139977741 | 7       | ENSSSCT00000016969 | TPR      | intron     | -0.293 | .           | 2 |

|               |   |           |           |         |                    |             |          |            |        |               |   |
|---------------|---|-----------|-----------|---------|--------------------|-------------|----------|------------|--------|---------------|---|
| AT.AT         | 9 | 140078471 | 140078483 | 6.5     | .                  | .           | .        | intergenic | .      | rs792594960   | 4 |
| AAAT.ATTT     | 9 | 140136456 | 140136475 | 5       | .                  | .           | .        | intergenic | .      | rs791443033   | 2 |
| AAAAG.CTTTT   | 9 | 140416032 | 140416050 | 3.8     | .                  | .           | .        | intergenic | -0.029 | 342485 rs7907 | 2 |
| AC.GT         | 9 | 140484248 | 140484257 | 5       | ENSSSCT00000022784 | PLA2G4A     | intron   | .          | .      | rs789244680   | 3 |
| AAAT.ATTT     | 9 | 140487104 | 140487119 | 4       | ENSSSCT00000022784 | PLA2G4A     | intron   | -0.082     | .      | rs788301503   | 2 |
| AAAAC.GTTTT   | 9 | 140551232 | 140551255 | 4.8     | ENSSSCT00000022784 | PLA2G4A     | intron   | -0.342     | .      | rs786208974   | 2 |
| AAT.ATT       | 9 | 140559997 | 140560010 | 4.66667 | ENSSSCT00000022784 | PLA2G4A     | intron   | 0.003      | .      | rs792570717   | 2 |
| AAAAC.GTTTT   | 9 | 140642771 | 140642793 | 3.83333 | .                  | .           | .        | intergenic | -0.178 | .             | 2 |
| AAAC.GTTT     | 9 | 140786929 | 140786951 | 5.75    | .                  | .           | .        | intergenic | .      | rs787325721   | 3 |
| AC.GT         | 9 | 141140559 | 141140585 | 13.5    | ENSSSCT00000031583 | KCNK2       | intron   | -0.015     | .      | rs705423429   | 5 |
| AAAC.GTTT     | 9 | 141140706 | 141140719 | 3.5     | ENSSSCT00000031583 | KCNK2       | intron   | -0.024     | .      | rs787446109   | 2 |
| AT.AT         | 9 | 141434236 | 141434245 | 5       | .                  | .           | .        | intergenic | .      | rs786589715   | 2 |
| AAAAAT.ATTTTT | 9 | 141478335 | 141478356 | 3.66667 | .                  | .           | .        | intergenic | -0.12  | rs788929234   | 2 |
| AAAT.ATTT     | 9 | 141497858 | 141497870 | 3.25    | .                  | .           | .        | intergenic | 0.159  | .             | 2 |
| AAAT.ATTT     | 9 | 141607835 | 141607852 | 4.5     | .                  | .           | .        | intergenic | -0.098 | rs793537795   | 2 |
| AAAT.ATTT     | 9 | 141614355 | 141614377 | 5.75    | .                  | .           | .        | intergenic | .      | 116220 rs7898 | 2 |
| AAG.CTT       | 9 | 141626848 | 141626862 | 5       | .                  | .           | .        | intergenic | -0.016 | .             | 2 |
| AAGAG.CTCTT   | 9 | 141761125 | 141761141 | 3.4     | .                  | .           | .        | intergenic | 0.033  | .             | 2 |
| AC.GT         | 9 | 141788155 | 141788175 | 10.5    | .                  | .           | .        | intergenic | -0.022 | rs790578766   | 2 |
| AAC.GTT       | 9 | 141869029 | 141869044 | 5.33333 | .                  | .           | .        | intergenic | -0.075 | rs791060592   | 2 |
| AAC.GTT       | 9 | 142185454 | 142185477 | 8       | ENSSSCT00000016976 | SMYD2       | intron   | -0.14      | .      | 709583 rs7900 | 2 |
| AAC.GTT       | 9 | 142292276 | 142292294 | 6.33333 | .                  | .           | .        | intergenic | -0.008 | rs787171927   | 2 |
| GAGGG.CCCTC   | 9 | 142539244 | 142539268 | 4.16667 | .                  | .           | .        | intergenic | .      | rs791639471   | 2 |
| AC.GT         | 9 | 143080322 | 143080338 | 8.5     | ENSSSCT00000016978 | .           | promoter | 0.385      | .      | .             | 2 |
| AAC.GTT       | 9 | 143144279 | 143144293 | 5       | .                  | .           | .        | intergenic | 0.445  | rs787383243   | 2 |
| AT.AT         | 9 | 143327715 | 143327728 | 7       | ENSSSCT00000016980 | .           | intron   | 0.401      | .      | rs792811327   | 2 |
| AAAT.ATTT     | 9 | 143396161 | 143396174 | 3.5     | ENSSSCT00000016981 | ANGEL2      | intron   | 1.513      | .      | rs786882826   | 2 |
| AG.CT         | 9 | 143551153 | 143551165 | 6.5     | ENSSSCT00000016986 | NSL1        | intron   | 0.163      | .      | .             | 3 |
| AG.CT         | 9 | 143551153 | 143551165 | 6.5     | ENSSSCT00000016985 | TATDN3      | promoter | 0.163      | .      | .             | 3 |
| AAAC.GTTT     | 9 | 143566189 | 143566220 | 8       | ENSSSCT00000016986 | NSL1        | intron   | 0.275      | .      | 379706 rs7925 | 2 |
| AAAAC.GTTTT   | 9 | 143756750 | 143756772 | 3.83333 | .                  | .           | .        | intergenic | -0.182 | rs788744350   | 2 |
| AC.GT         | 9 | 143776206 | 143776215 | 5       | .                  | .           | .        | intergenic | .      | rs786796886   | 2 |
| AC.GT         | 9 | 143881885 | 143881903 | 9.5     | .                  | .           | .        | intergenic | -0.012 | .             | 2 |
| AG.CT         | 9 | 143991835 | 143991849 | 7.5     | .                  | .           | .        | intergenic | -0.07  | 392084 rs7901 | 2 |
| AAC.GTT       | 9 | 144008082 | 144008094 | 4.33333 | ENSSSCT00000016990 | NENF        | promoter | -0.033     | .      | rs791697404   | 2 |
| AAC.GTT       | 9 | 144008082 | 144008094 | 4.33333 | ENSSSCT00000024915 | NENF        | promoter | -0.033     | .      | rs791697404   | 2 |
| AC.GT         | 9 | 144019920 | 144019935 | 8       | ENSSSCT00000016991 | TMEM206     | intron   | 0.443      | .      | rs786631961   | 4 |
| AAAC.GTTT     | 9 | 144074551 | 144074574 | 6       | ENSSSCT00000016992 | PPP2R5A     | intron   | 0.254      | .      | 394943 rs7889 | 2 |
| AAT.ATT       | 9 | 144101349 | 144101362 | 4.66667 | ENSSSCT00000016992 | PPP2R5A     | intron   | .          | .      | rs793203983   | 2 |
| AAGG.CCTT     | 9 | 144243921 | 144243935 | 3.75    | .                  | .           | .        | intergenic | -0.072 | rs792749633   | 2 |
| AC.GT         | 9 | 144300481 | 144300490 | 5       | ENSSSCT00000016993 | DTL         | intron   | 0.732      | .      | rs793467476   | 3 |
| AC.GT         | 9 | 144436451 | 144436465 | 7.5     | .                  | .           | .        | intergenic | 0.129  | rs791491585   | 6 |
| AAAG.CTTT     | 9 | 144454541 | 144454552 | 3       | .                  | .           | .        | intergenic | 0.047  | .             | 2 |
| AAAC.GTTT     | 9 | 144479645 | 144479659 | 3.75    | ENSSSCT00000016996 | LPGAT1      | intron   | .          | .      | 235677 rs7877 | 2 |
| AT.AT         | 9 | 144496102 | 144496113 | 6       | ENSSSCT00000016996 | LPGAT1      | intron   | 0.315      | .      | 112013 rs7912 | 2 |
| AAAC.GTTT     | 9 | 144596844 | 144596858 | 3.75    | ENSSSCT00000016997 | NEK2        | intron   | -0.097     | .      | 337492 rs7905 | 2 |
| AAAC.GTTT     | 9 | 144723285 | 144723309 | 6.25    | .                  | .           | .        | intergenic | 0.138  | rs791698863   | 2 |
| AAAG.CTTT     | 9 | 144795588 | 144795607 | 5       | .                  | .           | .        | intergenic | 0.184  | rs792512992   | 2 |
| AAAAC.GTTTT   | 9 | 144993132 | 144993146 | 3       | .                  | .           | .        | intergenic | 0.21   | 386668 rs7885 | 2 |
| AAC.GTT       | 9 | 145018231 | 145018246 | 5.33333 | .                  | .           | .        | intergenic | 0.042  | 343808 rs7871 | 2 |
| AAAC.GTTT     | 9 | 145188651 | 145188672 | 5.5     | .                  | .           | .        | intergenic | .      | rs791276127   | 2 |
| AAGG.CCTT     | 9 | 145210878 | 145210893 | 4       | .                  | .           | .        | intergenic | 0.082  | 367600 rs7937 | 2 |
| AG.CT         | 9 | 145313395 | 145313407 | 6.5     | .                  | .           | .        | intergenic | 0.248  | 300509 rs7920 | 2 |
| AATT.AATT     | 9 | 145350562 | 145350578 | 4.25    | .                  | .           | .        | intergenic | .      | 329704 rs7912 | 2 |
| AG.CT         | 9 | 145389748 | 145389758 | 5.5     | ENSSSCT00000017001 | HHAT        | intron   | -0.355     | .      | .             | 2 |
| AC.GT         | 9 | 145456134 | 145456148 | 7.5     | ENSSSCT00000017001 | HHAT        | intron   | 0.066      | .      | 339024 rs7910 | 4 |
| AT.AT         | 9 | 145584547 | 145584560 | 7       | ENSSSCT00000017001 | HHAT        | intron   | -0.322     | .      | rs789032404   | 2 |
| AAAT.ATTT     | 9 | 145728870 | 145728884 | 3.75    | .                  | .           | .        | intergenic | .      | 317791 rs7935 | 2 |
| AAC.GTT       | 9 | 145820187 | 145820203 | 5.66667 | .                  | .           | .        | intergenic | .      | rs788209539   | 3 |
| AAC.GTT       | 9 | 145836630 | 145836642 | 4.33333 | .                  | .           | .        | intergenic | .      | rs789585165   | 4 |
| AAT.ATT       | 9 | 145858452 | 145858466 | 5       | ENSSSCT00000017004 | SYT14       | intron   | 1.179      | .      | rs793383000   | 2 |
| AAAAC.GTTTT   | 9 | 145982081 | 145982098 | 3.6     | ENSSSCT00000017004 | SYT14       | intron   | .          | .      | rs791800001   | 2 |
| AAC.TAGTT     | 9 | 146224869 | 146224886 | 4.5     | .                  | .           | .        | intergenic | 0.057  | 314875 rs7918 | 2 |
| AAGG.CCTT     | 9 | 146230832 | 146230857 | 6.5     | .                  | .           | .        | intergenic | 0.102  | rs788503885   | 2 |
| AC.GT         | 9 | 146287564 | 146287583 | 10      | .                  | .           | .        | intergenic | .      | rs792309976   | 2 |
| AAC.GTT       | 9 | 146496495 | 146496513 | 6.33333 | .                  | .           | .        | intergenic | 0.04   | rs786521685   | 2 |
| AC.GT         | 9 | 146496901 | 146496913 | 6.5     | .                  | .           | .        | intergenic | 0.014  | rs791432331   | 2 |
| AAAT.ATTT     | 9 | 146743122 | 146743136 | 3.75    | .                  | .           | .        | intergenic | -0.011 | .             | 3 |
| AC.GT         | 9 | 146947497 | 146947515 | 9.5     | .                  | .           | .        | intergenic | 0.023  | 722556 rs7890 | 2 |
| AC.GT         | 9 | 147020795 | 147020807 | 6.5     | .                  | .           | .        | intergenic | .      | rs792578160   | 2 |
| AAAAC.GTTTT   | 9 | 147076990 | 147077018 | 4.83333 | .                  | .           | .        | intergenic | -0.058 | 311048 rs7878 | 2 |
| AG.CT         | 9 | 147093646 | 147093673 | 14      | .                  | .           | .        | intergenic | .      | .             | 2 |
| AT.AT         | 9 | 147123143 | 147123154 | 6       | .                  | .           | .        | intergenic | .      | 396089 rs7885 | 2 |
| AAAC.GTTT     | 9 | 147132552 | 147132584 | 8.25    | .                  | .           | .        | intergenic | -0.075 | 373832 rs7893 | 2 |
| AC.GT         | 9 | 147142866 | 147142880 | 7.5     | .                  | .           | .        | intergenic | -0.022 | rs787458208   | 2 |
| AC.GT         | 9 | 147407154 | 147407163 | 5       | .                  | .           | .        | intergenic | .      | rs791367130   | 2 |
| AAAAC.GTTTT   | 9 | 147428765 | 147428782 | 3.6     | .                  | .           | .        | intergenic | .      | 348635 rs7893 | 2 |
| AC.GT         | 9 | 147581472 | 147581483 | 6       | .                  | .           | .        | intergenic | -0.072 | 719520 rs7906 | 2 |
| AT.AT         | 9 | 148364489 | 148364499 | 5.5     | .                  | .           | .        | intergenic | -0.218 | rs792443462   | 2 |
| AG.CT         | 9 | 148412162 | 148412172 | 5.5     | .                  | .           | .        | intergenic | .      | rs787523203   | 2 |
| AC.GT         | 9 | 148551534 | 148551548 | 7.5     | ENSSSCT00000020629 | sc-mir-29b- | promoter | 0.01       | .      | .             | 2 |
| AC.GT         | 9 | 148551534 | 148551548 | 7.5     | ENSSSCT00000021258 | ssc-mir-29c | promoter | 0.01       | .      | .             | 2 |
| AAAC.GTTT     | 9 | 148858681 | 148858703 | 5.75    | ENSSSCT00000031404 | ABCA13      | intron   | .          | .      | rs793245285   | 2 |
| AAAAAT.ATTTTT | 9 | 148863486 | 148863507 | 3.66667 | ENSSSCT00000031404 | ABCA13      | intron   | -0.318     | .      | .             | 2 |

|             |   |           |           |         |                    |              |            |        |                 |   |
|-------------|---|-----------|-----------|---------|--------------------|--------------|------------|--------|-----------------|---|
| AC.GT       | 9 | 148897728 | 148897738 | 5.5     | ENSSSCT00000031404 | ABCA13       | intron     | -0.303 | rs787117636     | 2 |
| AT.AT       | 9 | 148900571 | 148900580 | 5       | ENSSSCT00000031404 | ABCA13       | intron     | 0.419  | rs788650583     | 2 |
| AAAAC.GTTTT | 9 | 148967931 | 148967954 | 4.8     | .                  | .            | intergenic | 0.035  | rs792411458     | 2 |
| AG.CT       | 9 | 148992024 | 148992050 | 13.5    | .                  | .            | intergenic | -0.305 | rs786535082     | 2 |
| AAC.GTT     | 9 | 149022438 | 149022454 | 5.66667 | .                  | .            | intergenic | -0.244 | rs788033088     | 3 |
| AT.AT       | 9 | 149062857 | 149062866 | 5       | .                  | .            | intergenic | 0.022  | .               | 2 |
| AT.AT       | 9 | 149216873 | 149216884 | 6       | .                  | .            | intergenic | .      | .               | 3 |
| AAC.GTT     | 9 | 149313360 | 149313371 | 4       | .                  | .            | intergenic | .      | rs789046986     | 2 |
| AAAC.GTTT   | 9 | 149480497 | 149480516 | 5       | .                  | .            | intergenic | .      | rs787686379     | 2 |
| AAAT.ATTT   | 9 | 149879385 | 149879402 | 4.5     | .                  | .            | intergenic | .      | rs788095348     | 2 |
| AC.GT       | 9 | 150286532 | 150286541 | 5       | ENSSSCT00000031836 | GRB10        | intron     | -0.026 | rs791775782     | 2 |
| AC.GT       | 9 | 150286532 | 150286541 | 5       | ENSSSCT00000017025 | GRB10        | intron     | -0.026 | rs791775782     | 2 |
| AC.GT       | 9 | 150766463 | 150766473 | 5.5     | .                  | .            | intergenic | .      | rs786567765     | 2 |
| ATAT.ATAT   | 9 | 151014667 | 151014697 | 7.75    | .                  | .            | intergenic | .      | rs24701 rs7884  | 4 |
| AAAC.GTTT   | 9 | 151367447 | 151367467 | 5.25    | .                  | .            | intergenic | .      | .               | 2 |
| AC.GT       | 9 | 151418328 | 151418344 | 8.5     | .                  | .            | intergenic | -0.178 | rs788934233     | 3 |
| AT.AT       | 9 | 151428155 | 151428166 | 6       | .                  | .            | intergenic | -0.283 | rs314226 rs7872 | 2 |
| AAAG.CTTT   | 9 | 151699754 | 151699768 | 3.75    | .                  | .            | intergenic | -0.295 | rs392608 rs7881 | 2 |
| AC.GT       | 9 | 151756977 | 151756992 | 8       | .                  | .            | intergenic | .      | .               | 2 |
| AG.CT       | 9 | 151886869 | 151886878 | 5       | .                  | .            | intergenic | -0.144 | rs793196 rs7064 | 3 |
| AC.GT       | 9 | 151914967 | 151914978 | 6       | .                  | .            | intergenic | .      | rs323057 rs7015 | 2 |
| AAAC.GTTT   | 9 | 151926566 | 151926583 | 4.5     | .                  | .            | intergenic | -0.113 | rs788495217     | 2 |
| AC.GT       | 9 | 152161133 | 152161157 | 12.5    | .                  | .            | intergenic | .      | rs786980826     | 2 |
| AAAC.GTTT   | 9 | 152161969 | 152161984 | 4       | .                  | .            | intergenic | .      | .               | 3 |
| AC.GT       | 9 | 152235226 | 152235238 | 6.5     | .                  | .            | intergenic | .      | .               | 2 |
| AAAAG.CTTTT | 9 | 152281102 | 152281123 | 4.4     | .                  | .            | intergenic | -0.066 | rs208330 rs7937 | 2 |
| AAAC.GTTT   | 9 | 152429412 | 152429426 | 3.75    | .                  | .            | intergenic | .      | rs398566 rs7906 | 4 |
| AG.CT       | 9 | 152434883 | 152434906 | 12      | .                  | .            | intergenic | -0.307 | rs384027 rs7936 | 2 |
| AAT.ATT     | 9 | 152561961 | 152561986 | 8.66667 | .                  | .            | intergenic | -0.434 | rs789942763     | 2 |
| AT.AT       | 9 | 152614199 | 152614210 | 6       | .                  | .            | intergenic | .      | .               | 2 |
| AAAC.GTTT   | 9 | 152834598 | 152834616 | 4.75    | .                  | .            | intergenic | -0.057 | rs789968655     | 2 |
| AC.GT       | 9 | 152990072 | 152990084 | 6.5     | .                  | .            | intergenic | 0.183  | rs333918 rs7896 | 2 |
| AC.GT       | 9 | 152997985 | 152997997 | 6.5     | .                  | .            | intergenic | 0.108  | rs793708017     | 2 |
| AG.CT       | 9 | 153063490 | 153063505 | 8       | .                  | .            | intergenic | .      | rs789055778     | 2 |
| AC.GT       | X | 444037    | 444070    | 17      | .                  | .            | intergenic | -0.46  | rs329075 rs7914 | 4 |
| AC.GT       | X | 819613    | 819625    | 6.5     | .                  | .            | intergenic | -0.066 | rs108129 rs7917 | 2 |
| AC.GT       | X | 1129513   | 1129525   | 6.5     | .                  | .            | intergenic | .      | rs789524002     | 3 |
| AAAC.GTTT   | X | 1289334   | 1289350   | 4.25    | .                  | .            | intergenic | -0.169 | rs341192 rs7936 | 2 |
| AAG.CTT     | X | 1467641   | 1467652   | 4       | .                  | .            | intergenic | .      | rs787427320     | 3 |
| AAAAT.ATTTT | X | 1522406   | 1522424   | 3.8     | .                  | .            | intergenic | .      | rs787500245     | 2 |
| AAT.ATT     | X | 1541856   | 1541879   | 8       | .                  | .            | intergenic | -0.421 | rs793083766     | 2 |
| ACCT.AGGT   | X | 1639259   | 1639281   | 5.75    | .                  | .            | intergenic | .      | rs786272548     | 2 |
| AAAG.CCTTT  | X | 1685405   | 1685428   | 4.8     | .                  | .            | intergenic | -0.534 | rs786842340     | 3 |
| AT.AT       | X | 1704171   | 1704180   | 5       | .                  | .            | intergenic | .      | rs7909120291    | 2 |
| AAAT.ATTT   | X | 1876058   | 1876086   | 7.25    | .                  | .            | intergenic | .      | rs790687663     | 2 |
| AAAG.CTTT   | X | 2210963   | 2210983   | 5.25    | .                  | .            | intergenic | 0.09   | rs791672665     | 2 |
| AC.GT       | X | 2257515   | 2257525   | 5.5     | .                  | .            | intergenic | -0.002 | rs786587327     | 2 |
| AG.CT       | X | 2351534   | 2351546   | 6.5     | .                  | .            | intergenic | .      | rs786812803     | 2 |
| AC.GT       | X | 2362792   | 2362801   | 5       | .                  | .            | intergenic | .      | rs790758536     | 2 |
| AAAC.GTTT   | X | 2736242   | 2736269   | 7       | .                  | .            | intergenic | .      | .               | 2 |
| AT.AT       | X | 2796922   | 2796942   | 10.5    | ENSSSCT00000013231 | NLGN4X       | intron     | -0.292 | rs788940848     | 2 |
| AACCC.GGGTT | X | 2802844   | 2802859   | 3.2     | ENSSSCT00000013231 | NLGN4X       | intron     | .      | rs790303695     | 2 |
| AT.AT       | X | 2826775   | 2826784   | 5       | ENSSSCT00000013231 | NLGN4X       | intron     | -0.282 | rs786925596     | 3 |
| AAC.GTT     | X | 2912015   | 2912027   | 4.33333 | ENSSSCT00000013231 | NLGN4X       | intron     | .      | rs791744762     | 2 |
| AAAAC.GTTTT | X | 3058293   | 3058315   | 3.83333 | ENSSSCT00000013231 | NLGN4X       | intron     | .      | rs790392878     | 2 |
| AAAC.GTTT   | X | 3164803   | 3164821   | 4.75    | ENSSSCT00000013231 | NLGN4X       | intron     | .      | rs791208215     | 2 |
| AT.AT       | X | 3386575   | 3386585   | 5.5     | .                  | .            | intergenic | -0.113 | rs703409209     | 3 |
| AC.GT       | X | 3463312   | 3463326   | 7.5     | .                  | .            | intergenic | .      | rs790478183     | 7 |
| AAAT.ATTT   | X | 3512867   | 3512881   | 3.75    | .                  | .            | intergenic | .      | rs727427 rs7896 | 2 |
| AC.GT       | X | 3747742   | 3747752   | 5.5     | .                  | .            | intergenic | 0.07   | .               | 3 |
| AACC.GGTT   | X | 4116492   | 4116506   | 3.75    | ENSSSCT00000032160 | STS          | intron     | .      | rs792136715     | 2 |
| AC.GT       | X | 4202205   | 4202219   | 7.5     | ENSSSCT00000035627 | STS          | intron     | .      | rs786933849     | 2 |
| AC.GT       | X | 4202205   | 4202219   | 7.5     | ENSSSCT00000032160 | STS          | intron     | .      | rs786933849     | 2 |
| AT.AT       | X | 4231696   | 4231705   | 5       | ENSSSCT00000035627 | STS          | intron     | .      | rs366110 rs7898 | 2 |
| AT.AT       | X | 4231696   | 4231705   | 5       | ENSSSCT00000032160 | STS          | intron     | .      | rs366110 rs7898 | 2 |
| AAAT.ATTT   | X | 4445274   | 4445288   | 3.75    | .                  | .            | intergenic | .      | rs789908377     | 2 |
| AAC.GTT     | X | 4447363   | 4447385   | 7.66667 | .                  | .            | intergenic | -0.291 | rs788770945     | 2 |
| AAAC.GTTT   | X | 4487649   | 4487664   | 4       | .                  | .            | intergenic | -0.526 | rs340671 rs7933 | 2 |
| AC.GT       | X | 4704811   | 4704822   | 6       | .                  | .            | intergenic | -0.256 | rs789499434     | 2 |
| AG.CT       | X | 4770462   | 4770478   | 8.5     | .                  | .            | intergenic | -0.214 | rs709407472     | 2 |
| AC.GT       | X | 4929889   | 4929900   | 6       | ENSSSCT00000034295 | rs1242-236E1 | intron     | -0.111 | rs789409316     | 3 |
| AC.GT       | X | 4929889   | 4929900   | 6       | ENSSSCT00000035815 | rs1242-236E1 | intron     | -0.111 | rs789409316     | 3 |
| AT.AT       | X | 5244346   | 5244361   | 8       | ENSSSCT00000035815 | rs1242-236E1 | intron     | 0.084  | rs390917 rs6974 | 4 |
| AC.GT       | X | 5470234   | 5470248   | 7.5     | ENSSSCT00000035619 | KAL1         | intron     | 0.052  | rs792609471     | 3 |
| AC.GT       | X | 5470234   | 5470248   | 7.5     | ENSSSCT00000013235 | KAL1         | intron     | 0.052  | rs792609471     | 3 |
| AG.CT       | X | 5534751   | 5534762   | 6       | ENSSSCT00000035619 | KAL1         | intron     | .      | rs136011 rs7882 | 2 |
| AG.CT       | X | 5534751   | 5534762   | 6       | ENSSSCT00000013235 | KAL1         | intron     | .      | rs136011 rs7882 | 2 |
| ACAG.CTGT   | X | 5552046   | 5552061   | 4       | ENSSSCT00000035619 | KAL1         | intron     | -0.256 | rs791173408     | 2 |
| ACAG.CTGT   | X | 5552046   | 5552061   | 4       | ENSSSCT00000013235 | KAL1         | intron     | -0.256 | rs791173408     | 2 |
| AAAC.GTTT   | X | 5624170   | 5624191   | 5.5     | .                  | .            | intergenic | -0.117 | rs786376842     | 2 |
| AC.GT       | X | 5716801   | 5716815   | 7.5     | .                  | .            | intergenic | -0.018 | .               | 2 |
| AAAT.ATTT   | X | 5839225   | 5839247   | 5.75    | .                  | .            | intergenic | .      | rs789577959     | 4 |
| AAAAC.GTTTT | X | 5868146   | 5868174   | 5.8     | .                  | .            | intergenic | 0.065  | rs313969 rs7922 | 2 |
| AAAC.GTTT   | X | 5873883   | 5873905   | 5.75    | .                  | .            | intergenic | 0.095  | rs384605 rs7921 | 2 |

|               |   |          |          |         |                    |         |            |        |                  |   |
|---------------|---|----------|----------|---------|--------------------|---------|------------|--------|------------------|---|
| AC.GT         | X | 6413272  | 6413283  | 6       | .                  | .       | intergenic | -0.135 | rs786732548      | 2 |
| AC.GT         | X | 7054349  | 7054359  | 5.5     | .                  | .       | intergenic | .      | rs787964763      | 2 |
| AC.GT         | X | 7351388  | 7351402  | 7.5     | ENSSSCT00000033365 | CLCN4   | intron     | -0.058 | rs791752577      | 2 |
| AC.GT         | X | 7351388  | 7351402  | 7.5     | ENSSSCT00000035935 | CLCN4   | intron     | -0.058 | rs791752577      | 2 |
| AAC.GTT       | X | 7413661  | 7413676  | 5.33333 | ENSSSCT00000022263 | CLCN4   | intron     | -0.229 | rs787765686      | 2 |
| AAC.GTT       | X | 7413661  | 7413676  | 5.33333 | ENSSSCT00000035935 | CLCN4   | intron     | -0.229 | rs787765686      | 2 |
| AAAC.GTTT     | X | 8312285  | 8312312  | 7       | .                  | .       | intergenic | 0.07   | rs789020935      | 2 |
| ACAT.ATGT     | X | 8434275  | 8434291  | 4.25    | .                  | .       | intergenic | .      | .                | 2 |
| AAG.CTT       | X | 8473400  | 8473411  | 4       | ENSSSCT00000035835 | ARHGAP6 | 3'utr      | 1.552  | rs791195052      | 2 |
| AAG.CTT       | X | 8473400  | 8473411  | 4       | ENSSSCT00000013247 | ARHGAP6 | 3'utr      | 1.552  | rs791195052      | 2 |
| AAAAT.ATTTT   | X | 8867390  | 8867409  | 4       | ENSSSCT00000033647 | ARHGAP6 | intron     | .      | rs786820460      | 2 |
| AT.AT         | X | 8882856  | 8882867  | 6       | ENSSSCT00000033647 | ARHGAP6 | intron     | 0.19   | .                | 2 |
| AC.GT         | X | 9272068  | 9272080  | 6.5     | .                  | .       | intergenic | .      | rs786647653      | 2 |
| AAC.GTT       | X | 9470380  | 9470396  | 5.66667 | .                  | .       | intergenic | 0.243  | rs7865           | 2 |
| AAAG.CTTT     | X | 9996528  | 9996544  | 4.25    | .                  | .       | intergenic | -0.349 | rs786301018      | 2 |
| AAAC.GTTT     | X | 10064586 | 10064600 | 3.75    | .                  | .       | intergenic | 0.174  | rs793795236      | 2 |
| AG.CT         | X | 10158556 | 10158577 | 11      | .                  | .       | intergenic | .      | rs732419 rs7922  | 3 |
| AAC.GTT       | X | 10219237 | 10219259 | 7.66667 | .                  | .       | intergenic | 0.086  | rs789657942      | 2 |
| AT.AT         | X | 10331375 | 10331392 | 9       | ENSSSCT00000034697 | FRMPD4  | intron     | 0.076  | rs791476539      | 2 |
| AAAAC.GTTTT   | X | 10538650 | 10538668 | 3.8     | .                  | .       | intergenic | 0.094  | rs789328627      | 2 |
| AAAAAC.GTTTTT | X | 10718558 | 10718581 | 4       | .                  | .       | intergenic | -0.021 | rs786546504      | 2 |
| AAT.ATT       | X | 10998450 | 10998469 | 6.66667 | ENSSSCT00000035913 | EGFL6   | intron     | 0.117  | rs791838738      | 2 |
| AAAAC.GTTTT   | X | 11168688 | 11168717 | 6       | ENSSSCT00000035913 | EGFL6   | intron     | 0.129  | rs788768559      | 2 |
| AAAC.GTTT     | X | 11609926 | 11609949 | 6       | ENSSSCT00000013266 | GEMIN8  | intron     | 0.199  | rs790522 rs7893  | 2 |
| AAAC.GTTT     | X | 11609926 | 11609949 | 6       | ENSSSCT00000033507 | GEMIN8  | intron     | 0.199  | rs790522 rs7893  | 2 |
| AG.CT         | X | 11635521 | 11635533 | 6.5     | .                  | .       | intergenic | 0.486  | rs788300475      | 2 |
| AT.AT         | X | 11715821 | 11715831 | 5.5     | .                  | .       | intergenic | -0.021 | rs793590804      | 2 |
| AAAAAC.GTTTTT | X | 11803988 | 11804013 | 4.33333 | .                  | .       | intergenic | 0.4    | rs786546504      | 2 |
| AAAC.GTTT     | X | 11826470 | 11826489 | 5       | .                  | .       | intergenic | 0.421  | rs786596315      | 2 |
| AG.CT         | X | 11888005 | 11888015 | 5.5     | .                  | .       | intergenic | 0.14   | .                | 3 |
| AAAC.GTTT     | X | 12069720 | 12069740 | 5.25    | .                  | .       | intergenic | .      | rs786507618      | 2 |
| AAAC.GTTT     | X | 12154582 | 12154594 | 3.25    | ENSSSCT00000033189 | GLRA2   | intron     | 0.134  | rs788252665      | 2 |
| AAAC.GTTT     | X | 12154582 | 12154594 | 3.25    | ENSSSCT00000013268 | GLRA2   | intron     | 0.134  | rs788252665      | 2 |
| AAAT.ATTT     | X | 12294886 | 12294905 | 5       | .                  | .       | intergenic | 0.236  | rs786600 rs7888  | 2 |
| AAAAT.ATTTT   | X | 12332588 | 12332610 | 4.6     | .                  | .       | intergenic | .      | rs789322 rs7893  | 2 |
| AAAC.GTTT     | X | 12369150 | 12369165 | 4       | ENSSSCT00000036081 | MOSPD2  | intron     | 0.317  | rs7863822 rs7909 | 2 |
| AAAC.GTTT     | X | 12369150 | 12369165 | 4       | ENSSSCT00000013270 | MOSPD2  | intron     | 0.317  | rs7863822 rs7909 | 2 |
| AAAC.GTTT     | X | 12369150 | 12369165 | 4       | ENSSSCT00000033995 | MOSPD2  | intron     | 0.317  | rs7863822 rs7909 | 2 |
| AAAC.GTTT     | X | 13009154 | 13009174 | 5.25    | ENSSSCT00000032788 | BMX     | intron     | 0.152  | rs787247646      | 2 |
| AAAC.GTTT     | X | 13009154 | 13009174 | 5.25    | ENSSSCT00000013276 | BMX     | intron     | 0.152  | rs787247646      | 2 |
| AAAC.GTTT     | X | 13009154 | 13009174 | 5.25    | ENSSSCT00000032899 | BMX     | promoter   | 0.152  | rs787247646      | 2 |
| AC.GT         | X | 13067229 | 13067239 | 5.5     | ENSSSCT00000013277 | ACE2    | intron     | 0.13   | rs788810847      | 2 |
| AC.GT         | X | 13067229 | 13067239 | 5.5     | ENSSSCT00000034032 | ACE2    | intron     | 0.13   | rs788810847      | 2 |
| AC.GT         | X | 13067229 | 13067239 | 5.5     | ENSSSCT00000034745 | ACE2    | promoter   | 0.13   | rs788810847      | 2 |
| AC.GT         | X | 13088154 | 13088169 | 8       | ENSSSCT00000013277 | ACE2    | intron     | .      | rs792419619      | 3 |
| AAAAG.CTTT    | X | 13705813 | 13705833 | 4.2     | .                  | .       | intergenic | 0.369  | rs788335952      | 2 |
| AC.GT         | X | 13847579 | 13847598 | 10      | .                  | .       | intergenic | .      | rs789287321      | 2 |
| AAG.CTT       | X | 14019281 | 14019294 | 4.66667 | ENSSSCT00000013285 | CTPS2   | intron     | 0.21   | rs790732654      | 2 |
| AG.CT         | X | 14391053 | 14391067 | 7.5     | ENSSSCT00000033396 | REPS2   | intron     | .      | .                | 4 |
| AG.CT         | X | 14391053 | 14391067 | 7.5     | ENSSSCT00000026314 | REPS2   | intron     | .      | .                | 4 |
| AG.CT         | X | 14391053 | 14391067 | 7.5     | ENSSSCT00000034223 | REPS2   | intron     | .      | .                | 4 |
| AG.CT         | X | 14391053 | 14391067 | 7.5     | ENSSSCT00000013289 | REPS2   | intron     | .      | .                | 4 |
| AG.CT         | X | 14765960 | 14765971 | 6       | .                  | .       | intergenic | 0.503  | rs793769259      | 2 |
| AC.GT         | X | 14873910 | 14873929 | 10      | .                  | .       | intergenic | 0.269  | rs792226537      | 5 |
| AATG.CATT     | X | 15225740 | 15225764 | 6.25    | ENSSSCT00000033095 | NHS     | intron     | 0.195  | rs788102735      | 2 |
| AATG.CATT     | X | 15225740 | 15225764 | 6.25    | ENSSSCT00000032786 | NHS     | intron     | 0.195  | rs788102735      | 2 |
| AAAAAC.GTTTTT | X | 15438238 | 15438260 | 3.83333 | .                  | .       | intergenic | .      | rs791443818      | 2 |
| AAT.ATT       | X | 16000228 | 16000258 | 10.3333 | .                  | .       | intergenic | .      | rs791824693      | 3 |
| AAAC.GTTT     | X | 16231586 | 16231606 | 5.25    | ENSSSCT00000032659 | CDKL5   | intron     | 0.358  | rs792529452      | 2 |
| AAAC.GTTT     | X | 16231586 | 16231606 | 5.25    | ENSSSCT00000033642 | CDKL5   | intron     | 0.358  | rs792529452      | 2 |
| AAAC.GTTT     | X | 16231586 | 16231606 | 5.25    | ENSSSCT00000013297 | CDKL5   | intron     | 0.358  | rs792529452      | 2 |
| AAAC.GTTT     | X | 16350441 | 16350459 | 4.75    | ENSSSCT00000032792 | PPEF1   | intron     | 0.39   | rs791763448      | 2 |
| AAAC.GTTT     | X | 16350441 | 16350459 | 4.75    | ENSSSCT00000035020 | PPEF1   | intron     | 0.39   | rs791763448      | 2 |
| AAAC.GTTT     | X | 16350441 | 16350459 | 4.75    | ENSSSCT00000034554 | PPEF1   | intron     | 0.39   | rs791763448      | 2 |
| AAG.CTT       | X | 16400734 | 16400750 | 5.66667 | ENSSSCT00000031758 | PPEF1   | intron     | 0.31   | rs792324460      | 2 |
| AAG.CTT       | X | 16400734 | 16400750 | 5.66667 | ENSSSCT00000035020 | PPEF1   | intron     | 0.31   | rs792324460      | 2 |
| AAG.CTT       | X | 16400734 | 16400750 | 5.66667 | ENSSSCT00000034554 | PPEF1   | intron     | 0.31   | rs792324460      | 2 |
| AC.GT         | X | 16692006 | 16692016 | 5.5     | .                  | .       | intergenic | .      | .                | 2 |
| AAAT.ATTT     | X | 17038275 | 17038292 | 4.5     | ENSSSCT00000036543 | MAP3K15 | intron     | .      | rs790081070      | 2 |
| AAAT.ATTT     | X | 17038275 | 17038292 | 4.5     | ENSSSCT00000024706 | MAP3K15 | intron     | .      | rs790081070      | 2 |
| ACC.GGT       | X | 17100361 | 17100380 | 6.66667 | ENSSSCT00000036543 | MAP3K15 | intron     | 0.548  | rs793334333      | 2 |
| ACC.GGT       | X | 17100361 | 17100380 | 6.66667 | ENSSSCT00000024706 | MAP3K15 | intron     | 0.548  | rs793334333      | 2 |
| AT.AT         | X | 17911140 | 17911149 | 5       | .                  | .       | intergenic | .      | rs793560852      | 2 |
| AC.GT         | X | 17962087 | 17962099 | 6.5     | .                  | .       | intergenic | 0.324  | .                | 2 |
| AAAC.GTTT     | X | 19408511 | 19408531 | 5.25    | ENSSSCT00000034419 | PHEX    | intron     | 0.23   | rs793838836      | 2 |
| AAAC.GTTT     | X | 19408511 | 19408531 | 5.25    | ENSSSCT00000013308 | PHEX    | intron     | 0.23   | rs793838836      | 2 |
| AG.CT         | X | 19546508 | 19546519 | 6       | ENSSSCT00000034419 | PHEX    | intron     | 0.17   | rs787540011      | 2 |
| AG.CT         | X | 19546508 | 19546519 | 6       | ENSSSCT00000013308 | PHEX    | intron     | 0.17   | rs787540011      | 2 |
| AC.GT         | X | 20130106 | 20130120 | 7.5     | .                  | .       | intergenic | .      | rs787187 rs7909  | 2 |
| AT.AT         | X | 20447048 | 20447068 | 10.5    | .                  | .       | intergenic | -0.031 | rs792383454      | 2 |
| AAAC.GTTT     | X | 20769242 | 20769263 | 5.5     | .                  | .       | intergenic | 0.228  | rs789589154      | 2 |
| AAAAG.CTTT    | X | 20891858 | 20891881 | 4.8     | ENSSSCT00000034582 | PTCHD1  | intron     | 0.517  | rs791382418      | 2 |
| AAAAG.CTTT    | X | 20891858 | 20891881 | 4.8     | ENSSSCT00000013312 | PTCHD1  | intron     | 0.517  | rs791382418      | 2 |
| AT.AT         | X | 20915904 | 20915915 | 6       | .                  | .       | intergenic | 1.015  | rs789568474      | 2 |

|              |   |          |          |         |                    |         |            |        |             |   |
|--------------|---|----------|----------|---------|--------------------|---------|------------|--------|-------------|---|
| AG.CT        | X | 21157234 | 21157250 | 8.5     | .                  | .       | intergenic | -0.23  | rs789902622 | 2 |
| AAAC.GTTT    | X | 22331548 | 22331574 | 6.75    | .                  | .       | intergenic | 0.596  | rs788801306 | 4 |
| AAT.ATT      | X | 22351133 | 22351144 | 4       | .                  | .       | intergenic | 0.2    | rs789490613 | 2 |
| AAAG.CTTT    | X | 22395699 | 22395718 | 5       | ENSSSCT00000033790 | POLA1   | intron     | 0.518  | rs786684734 | 2 |
| AAACC.GGTTT  | X | 22426208 | 22426235 | 5.6     | ENSSSCT00000033790 | POLA1   | intron     | 0.438  | .           | 2 |
| AAAT.ATTT    | X | 22488261 | 22488279 | 4.75    | .                  | .       | intergenic | .      | .           | 2 |
| AAAT.ATTT    | X | 22539939 | 22539966 | 7       | .                  | .       | intergenic | .      | rs793757045 | 2 |
| AC.GT        | X | 22677879 | 22677889 | 5.5     | .                  | .       | intergenic | .      | .           | 2 |
| AAAC.GTTT    | X | 22811269 | 22811283 | 3.75    | .                  | .       | intergenic | 0.32   | rs793339842 | 2 |
| AAAG.CTTT    | X | 22895788 | 22895812 | 6.25    | .                  | .       | intergenic | 0.202  | rs790168826 | 2 |
| AAAT.ATTT    | X | 23009506 | 23009518 | 3.25    | .                  | .       | intergenic | .      | rs791935652 | 2 |
| AAATT.AATTT  | X | 23234475 | 23234500 | 5.2     | .                  | .       | intergenic | 0.234  | rs788739561 | 2 |
| AAAAC.GTTTT  | X | 23299237 | 23299255 | 3.8     | .                  | .       | intergenic | .      | .           | 3 |
| AAT.ATT      | X | 23303109 | 23303135 | 9       | .                  | .       | intergenic | 0.165  | rs788784682 | 2 |
| AAT.ATT      | X | 23401877 | 23401890 | 4.66667 | .                  | .       | intergenic | 0.265  | rs791622522 | 2 |
| AAAAG.CTTTT  | X | 23822154 | 23822184 | 6.2     | .                  | .       | intergenic | .      | rs793482822 | 2 |
| AAAT.ATTT    | X | 24305338 | 24305355 | 4.5     | .                  | .       | intergenic | 0.145  | rs787083544 | 2 |
| AT.AT        | X | 24487702 | 24487712 | 5.5     | .                  | .       | intergenic | 0.53   | rs789895739 | 3 |
| AAAAC.GTTTT  | X | 24563571 | 24563589 | 3.8     | .                  | .       | intergenic | 0.137  | rs790636137 | 2 |
| AG.CT        | X | 24571632 | 24571643 | 6       | .                  | .       | intergenic | 0.225  | .           | 2 |
| AC.GT        | X | 24664275 | 24664284 | 5       | .                  | .       | intergenic | .      | .           | 2 |
| AT.AT        | X | 24768644 | 24768661 | 9       | .                  | .       | intergenic | .      | rs788583599 | 2 |
| AT.AT        | X | 25151129 | 25151156 | 14      | .                  | .       | intergenic | 0.247  | rs79158160  | 2 |
| AAAC.GTTT    | X | 25269977 | 25270002 | 6.5     | .                  | .       | intergenic | .      | rs792342108 | 2 |
| AATATG.CATAT | X | 25592448 | 25592469 | 3.66667 | .                  | .       | intergenic | 0.256  | rs791283087 | 2 |
| AC.GT        | X | 26001291 | 26001303 | 6.5     | .                  | .       | intergenic | .      | rs792970151 | 2 |
| AAAC.GTTT    | X | 26148597 | 26148612 | 4       | .                  | .       | intergenic | 0.298  | rs791909843 | 2 |
| AAAC.GTTT    | X | 26221486 | 26221506 | 5.25    | .                  | .       | intergenic | .      | rs791306507 | 2 |
| AC.GT        | X | 26295726 | 26295750 | 12.5    | .                  | .       | intergenic | 0.267  | rs791354083 | 2 |
| AC.GT        | X | 26300140 | 26300150 | 5.5     | .                  | .       | intergenic | 0.386  | .           | 2 |
| AAAT.ATTT    | X | 26319267 | 26319287 | 5.25    | .                  | .       | intergenic | 0.599  | rs791281781 | 2 |
| AAC.GTT      | X | 26726654 | 26726680 | 9       | .                  | .       | intergenic | 0.021  | rs792264873 | 3 |
| AATC.GATT    | X | 26754543 | 26754570 | 7       | .                  | .       | intergenic | .      | rs790036968 | 2 |
| AT.AT        | X | 26831808 | 26831826 | 9.5     | .                  | .       | intergenic | 0.206  | rs789252749 | 2 |
| AC.GT        | X | 26957814 | 26957829 | 8       | .                  | .       | intergenic | -0.045 | .           | 2 |
| AC.GT        | X | 27672549 | 27672570 | 11      | .                  | .       | intergenic | -0.054 | rs788284359 | 3 |
| ACAT.ATGT    | X | 27677955 | 27677970 | 4       | .                  | .       | intergenic | 0.024  | rs787777193 | 2 |
| AATG.CATT    | X | 27874529 | 27874557 | 7.25    | .                  | .       | intergenic | 0.196  | rs789921955 | 2 |
| AAAT.ATTT    | X | 27932768 | 27932792 | 6.25    | .                  | .       | intergenic | 0.012  | rs788999321 | 2 |
| AATAC.GTATT  | X | 27962946 | 27962966 | 3.5     | .                  | .       | intergenic | 0.501  | rs788096655 | 2 |
| AG.CT        | X | 27969973 | 27969983 | 5.5     | .                  | .       | intergenic | 0.03   | rs791206836 | 2 |
| AAAC.GTTT    | X | 27980554 | 27980568 | 3.75    | .                  | .       | intergenic | 0.473  | rs792488458 | 2 |
| AC.GT        | X | 28193683 | 28193705 | 11.5    | ENSSSCT00000026433 | .       | exon       | 0.729  | .           | 2 |
| AC.GT        | X | 28668684 | 28668694 | 5.5     | .                  | .       | intergenic | .      | .           | 4 |
| AAAT.ATTT    | X | 28931920 | 28931935 | 4       | .                  | .       | intergenic | .      | rs786311944 | 2 |
| AC.GT        | X | 28938922 | 28938932 | 5.5     | .                  | .       | intergenic | .      | .           | 2 |
| AC.GT        | X | 29484329 | 29484340 | 6       | ENSSSCT00000029079 | DMD     | intron     | -0.027 | rs786867395 | 2 |
| AC.GT        | X | 29484329 | 29484340 | 6       | ENSSSCT00000013350 | DMD     | intron     | -0.027 | rs786867395 | 2 |
| AC.GT        | X | 29505452 | 29505462 | 5.5     | ENSSSCT00000029079 | DMD     | intron     | .      | rs786592457 | 2 |
| AC.GT        | X | 29505452 | 29505462 | 5.5     | ENSSSCT00000013350 | DMD     | intron     | .      | rs786592457 | 2 |
| AAAC.GTTT    | X | 29594018 | 29594053 | 9       | .                  | .       | intergenic | 0.092  | .           | 2 |
| AC.GT        | X | 29683392 | 29683413 | 11      | .                  | .       | intergenic | 0.264  | .           | 2 |
| AAAT.ATTT    | X | 29783843 | 29783862 | 5       | .                  | .       | intergenic | 0.389  | rs792058914 | 2 |
| AAAAC.GTTTT  | X | 31002914 | 31002943 | 5       | .                  | .       | intergenic | 0.107  | rs793277652 | 2 |
| AAAC.GTTT    | X | 31322893 | 31322904 | 3       | ENSSSCT00000034304 | DMD     | intron     | 0.016  | .           | 2 |
| AAAC.GTTT    | X | 31322893 | 31322904 | 3       | ENSSSCT00000026041 | DMD     | intron     | 0.016  | .           | 2 |
| AG.CT        | X | 31362918 | 31362929 | 6       | ENSSSCT00000034304 | DMD     | intron     | -0.183 | .           | 3 |
| AG.CT        | X | 31362918 | 31362929 | 6       | ENSSSCT00000026041 | DMD     | intron     | -0.183 | .           | 3 |
| AT.AT        | X | 31764118 | 31764127 | 5       | ENSSSCT00000034304 | DMD     | intron     | 0.067  | rs790032476 | 2 |
| AT.AT        | X | 31764118 | 31764127 | 5       | ENSSSCT00000026041 | DMD     | intron     | 0.067  | rs790032476 | 2 |
| AAAC.GTTT    | X | 31809224 | 31809267 | 11      | ENSSSCT00000026041 | DMD     | intron     | .      | rs786660655 | 2 |
| AAAC.GTTT    | X | 31809224 | 31809267 | 11      | ENSSSCT00000034304 | DMD     | intron     | .      | rs786660655 | 2 |
| AT.AT        | X | 31825580 | 31825589 | 5       | ENSSSCT00000026041 | DMD     | intron     | 0.089  | rs792469622 | 2 |
| AT.AT        | X | 31825580 | 31825589 | 5       | ENSSSCT00000034304 | DMD     | intron     | 0.089  | rs792469622 | 2 |
| AAAC.GTTT    | X | 31875864 | 31875888 | 6.25    | ENSSSCT00000034304 | DMD     | intron     | 0.773  | .           | 2 |
| AAAC.GTTT    | X | 31875864 | 31875888 | 6.25    | ENSSSCT00000026041 | DMD     | promoter   | 0.773  | .           | 2 |
| AC.GT        | X | 32057928 | 32057968 | 20.5    | .                  | .       | intergenic | 0.127  | rs791238    | 3 |
| AAT.ATT      | X | 32321319 | 32321336 | 6       | .                  | .       | intergenic | 0.074  | rs790635253 | 2 |
| AAT.ATT      | X | 32686731 | 32686744 | 4.66667 | .                  | .       | intergenic | .      | rs787979627 | 2 |
| AC.GT        | X | 34092317 | 34092346 | 15      | .                  | .       | intergenic | 0.131  | rs790831853 | 3 |
| AT.AT        | X | 34146088 | 34146098 | 5.5     | .                  | .       | intergenic | .      | .           | 2 |
| ACAT.ATGT    | X | 34582621 | 34582646 | 6.5     | .                  | .       | intergenic | 0.319  | rs787650765 | 3 |
| AC.GT        | X | 34748953 | 34748977 | 12.5    | .                  | .       | intergenic | .      | .           | 4 |
| AAAC.GTTT    | X | 34973092 | 34973119 | 7       | .                  | .       | intergenic | .      | rs793339151 | 3 |
| AAAT.ATTT    | X | 34980131 | 34980151 | 5.25    | .                  | .       | intergenic | 0.072  | .           | 2 |
| AAT.ATT      | X | 35210614 | 35210635 | 7.33333 | .                  | .       | intergenic | .      | rs788500941 | 2 |
| AAC.GTT      | X | 35563234 | 35563251 | 6       | .                  | .       | intergenic | .      | rs791334297 | 2 |
| AT.AT        | X | 35639983 | 35639995 | 6.5     | ENSSSCT00000034859 | CXorf30 | intron     | 0.258  | rs787862    | 3 |
| AG.CT        | X | 35701844 | 35701858 | 7.5     | ENSSSCT00000023277 | CXorf30 | intron     | .      | .           | 2 |
| AAAC.GTTT    | X | 35821033 | 35821047 | 3.75    | .                  | .       | intergenic | .      | rs790780328 | 2 |
| AC.GT        | X | 35833975 | 35833990 | 8       | .                  | .       | intergenic | 0.055  | .           | 3 |
| AC.GT        | X | 36411268 | 36411299 | 16      | .                  | .       | intergenic | 0.144  | rs786376478 | 3 |
| AC.GT        | X | 36842334 | 36842345 | 6       | ENSSSCT00000028670 | PRRG1   | intron     | .      | rs791307532 | 3 |
| AC.GT        | X | 36842334 | 36842345 | 6       | ENSSSCT00000036005 | PRRG1   | intron     | .      | rs791307532 | 3 |

|             |   |          |          |         |                    |           |            |        |               |   |   |
|-------------|---|----------|----------|---------|--------------------|-----------|------------|--------|---------------|---|---|
| AC.GT       | X | 37274150 | 37274159 | 5       | .                  | .         | intergenic | -0.037 | .             | . | 2 |
| AC.GT       | X | 37882455 | 37882470 | 8       | .                  | .         | intergenic | 0.123  | .             | . | 4 |
| AAC.GTT     | X | 37905681 | 37905692 | 4       | ENSSSCT00000034622 | SRPX      | intron     | .      | rs792105344   | . | 2 |
| AAC.GTT     | X | 37905681 | 37905692 | 4       | ENSSSCT00000013380 | SRPX      | intron     | .      | rs792105344   | . | 2 |
| AAC.GTT     | X | 37905681 | 37905692 | 4       | ENSSSCT00000036512 | SRPX      | intron     | .      | rs792105344   | . | 2 |
| AAC.GTT     | X | 37905681 | 37905692 | 4       | ENSSSCT00000034428 | SRPX      | intron     | .      | rs792105344   | . | 2 |
| AT.AT       | X | 38273741 | 38273750 | 5       | .                  | .         | intergenic | 0.361  | 364543 rs7917 | . | 2 |
| AGC.GCT     | X | 38280232 | 38280245 | 4.66667 | .                  | .         | intergenic | 0.236  | .             | . | 2 |
| AAAC.GTTT   | X | 39415385 | 39415399 | 3.75    | .                  | .         | intergenic | -0.134 | rs788832010   | . | 2 |
| AAAT.ATTT   | X | 39541295 | 39541309 | 3.75    | .                  | .         | intergenic | 0.544  | rs78887296    | . | 2 |
| ACG.CGT     | X | 39904595 | 39904611 | 5.66667 | ENSSSCT00000035677 | BCOR      | intron     | 0.146  | rs790956970   | . | 2 |
| ACG.CGT     | X | 39904595 | 39904611 | 5.66667 | ENSSSCT00000034818 | BCOR      | intron     | 0.146  | rs790956970   | . | 2 |
| ACG.CGT     | X | 39904595 | 39904611 | 5.66667 | ENSSSCT00000035361 | BCOR      | intron     | 0.146  | rs790956970   | . | 2 |
| AG.CT       | X | 40059612 | 40059625 | 7       | .                  | .         | intergenic | 0.021  | .             | . | 2 |
| AT.AT       | X | 40362325 | 40362336 | 6       | .                  | .         | intergenic | 0.252  | rs791381713   | . | 2 |
| AT.AT       | X | 40433357 | 40433367 | 5.5     | ENSSSCT00000013395 | CXorf38   | intron     | -0.156 | .             | . | 3 |
| AT.AT       | X | 40433357 | 40433367 | 5.5     | ENSSSCT00000035325 | CXorf38   | intron     | -0.156 | .             | . | 3 |
| AT.AT       | X | 40433357 | 40433367 | 5.5     | ENSSSCT00000036189 | CXorf38   | intron     | -0.156 | .             | . | 3 |
| AAC.GTT     | X | 40662973 | 40662998 | 8.66667 | .                  | .         | intergenic | .      | rs790460649   | . | 2 |
| AAAC.GTTT   | X | 41061754 | 41061766 | 3.25    | ENSSSCT00000033052 | H242-15C8 | exon       | 1.399  | 339780 rs7869 | . | 2 |
| AAG.CTT     | X | 41097333 | 41097348 | 5.33333 | .                  | .         | intergenic | .      | rs789109384   | . | 2 |
| AG.CT       | X | 41263607 | 41263620 | 7       | .                  | .         | intergenic | 0.177  | rs793312528   | . | 2 |
| AAAAC.GTTTT | X | 41267907 | 41267924 | 3.6     | .                  | .         | intergenic | -0.115 | rs790424528   | . | 2 |
| AAAC.GTTT   | X | 41628962 | 41628981 | 5       | ENSSSCT00000035253 | CASK      | intron     | 0.235  | rs789268222   | . | 2 |
| AAAC.GTTT   | X | 41628962 | 41628981 | 5       | ENSSSCT00000013399 | CASK      | intron     | 0.235  | rs789268222   | . | 2 |
| AC.GT       | X | 42212688 | 42212698 | 5.5     | .                  | .         | intergenic | 0.134  | rs793542398   | . | 2 |
| AAC.GTT     | X | 42339329 | 42339340 | 4       | .                  | .         | intergenic | 0.217  | rs788173813   | . | 2 |
| AAT.ATT     | X | 42672018 | 42672038 | 7       | .                  | .         | intergenic | 0.284  | rs788902643   | . | 2 |
| AT.AT       | X | 42817787 | 42817800 | 7       | .                  | .         | intergenic | 0.25   | 76322 rs7866  | . | 2 |
| AC.GT       | X | 43105036 | 43105049 | 7       | .                  | .         | intergenic | 0.112  | rs787821952   | . | 2 |
| AC.GT       | X | 43180788 | 43180801 | 7       | ENSSSCT00000033354 | MAOA      | intron     | 0.306  | rs789525502   | . | 2 |
| AC.GT       | X | 43180788 | 43180801 | 7       | ENSSSCT00000013404 | MAOA      | intron     | 0.306  | rs789525502   | . | 2 |
| AC.GT       | X | 43180788 | 43180801 | 7       | ENSSSCT00000032764 | MAOA      | intron     | 0.306  | rs789525502   | . | 2 |
| AAAG.CTTT   | X | 43182887 | 43182900 | 3.5     | ENSSSCT00000033354 | MAOA      | intron     | .      | rs788131584   | . | 2 |
| AAAG.CTTT   | X | 43182887 | 43182900 | 3.5     | ENSSSCT00000013404 | MAOA      | intron     | .      | rs788131584   | . | 2 |
| AAAG.CTTT   | X | 43182887 | 43182900 | 3.5     | ENSSSCT00000032764 | MAOA      | intron     | .      | rs788131584   | . | 2 |
| AAAC.GTTT   | X | 43688332 | 43688354 | 5.75    | .                  | .         | intergenic | 0.166  | rs787330094   | . | 2 |
| AT.AT       | X | 43794506 | 43794517 | 6       | ENSSSCT00000029739 | EFHC2     | intron     | .      | rs790624497   | . | 2 |
| AT.AT       | X | 43794506 | 43794517 | 6       | ENSSSCT00000035249 | EFHC2     | intron     | .      | rs790624497   | . | 2 |
| AATT.AATT   | X | 44651634 | 44651651 | 4.5     | ENSSSCT00000034832 | KDM6A     | intron     | 0.305  | rs791262832   | . | 2 |
| AATT.AATT   | X | 44651634 | 44651651 | 4.5     | ENSSSCT00000034861 | KDM6A     | intron     | 0.305  | rs791262832   | . | 2 |
| AATT.AATT   | X | 44651634 | 44651651 | 4.5     | ENSSSCT00000035071 | KDM6A     | intron     | 0.305  | rs791262832   | . | 2 |
| AATT.AATT   | X | 44651634 | 44651651 | 4.5     | ENSSSCT00000035936 | KDM6A     | intron     | 0.305  | rs791262832   | . | 2 |
| AATT.AATT   | X | 44651634 | 44651651 | 4.5     | ENSSSCT00000013409 | KDM6A     | intron     | 0.305  | rs791262832   | . | 2 |
| AATT.AATT   | X | 44651634 | 44651651 | 4.5     | ENSSSCT00000034919 | KDM6A     | intron     | 0.305  | rs791262832   | . | 2 |
| AATT.AATT   | X | 44651634 | 44651651 | 4.5     | ENSSSCT00000033770 | KDM6A     | intron     | 0.305  | rs791262832   | . | 2 |
| AATT.AATT   | X | 44651634 | 44651651 | 4.5     | ENSSSCT00000033265 | KDM6A     | intron     | 0.305  | rs791262832   | . | 2 |
| AATT.AATT   | X | 44651634 | 44651651 | 4.5     | ENSSSCT00000035863 | KDM6A     | intron     | 0.305  | rs791262832   | . | 2 |
| AATT.AATT   | X | 44651634 | 44651651 | 4.5     | ENSSSCT00000036305 | KDM6A     | intron     | 0.305  | rs791262832   | . | 2 |
| AAC.GTT     | X | 44822239 | 44822250 | 4       | .                  | .         | intergenic | .      | .             | . | 2 |
| AC.GT       | X | 44958444 | 44958456 | 6.5     | .                  | .         | intergenic | 0.19   | 314497 rs7930 | . | 2 |
| AC.GT       | X | 45156176 | 45156194 | 9.5     | .                  | .         | intergenic | 0.202  | rs792973283   | . | 2 |
| AT.AT       | X | 45168144 | 45168154 | 5.5     | .                  | .         | intergenic | -0.028 | .             | . | 3 |
| AAAT.ATTT   | X | 45272186 | 45272208 | 5.75    | .                  | .         | intergenic | 0.071  | rs793305311   | . | 2 |
| AAAG.CTTT   | X | 45342534 | 45342548 | 3.75    | .                  | .         | intergenic | 0.458  | rs790881103   | . | 2 |
| AG.CT       | X | 45393260 | 45393270 | 5.5     | .                  | .         | intergenic | 0.281  | rs787783842   | . | 2 |
| AAAAC.GTTTT | X | 45542374 | 45542392 | 3.8     | .                  | .         | intergenic | .      | 204260 rs7871 | . | 2 |
| AC.GT       | X | 46315059 | 46315069 | 5.5     | .                  | .         | intergenic | 0.357  | rs792373853   | . | 4 |
| AAAC.GTTT   | X | 46427287 | 46427314 | 7       | ENSSSCT00000013414 | JADE3     | intron     | .      | 129070 rs7921 | . | 2 |
| AAAC.GTTT   | X | 46427287 | 46427314 | 7       | ENSSSCT00000033102 | JADE3     | intron     | .      | 129070 rs7921 | . | 2 |
| AC.GT       | X | 47111007 | 47111016 | 5       | .                  | .         | intergenic | .      | 383659 rs7937 | . | 4 |
| AAAC.GTTT   | X | 47345819 | 47345834 | 4       | ENSSSCT00000033024 | SYN1      | intron     | 0.182  | rs793225989   | . | 2 |
| AAAC.GTTT   | X | 47345819 | 47345834 | 4       | ENSSSCT00000013425 | SYN1      | intron     | 0.182  | rs793225989   | . | 2 |
| AAAT.ATTT   | X | 48214404 | 48214418 | 3.75    | ENSSSCT00000029010 | .         | intron     | -0.672 | rs791215178   | . | 2 |
| AC.GT       | X | 48460740 | 48460756 | 8.5     | .                  | .         | intergenic | 0.207  | rs792956381   | . | 2 |
| AAAC.GTTT   | X | 48517075 | 48517098 | 6       | .                  | .         | intergenic | .      | rs792616012   | . | 2 |
| AC.GT       | X | 48537959 | 48537971 | 6.5     | .                  | .         | intergenic | .      | rs787260020   | . | 2 |
| AAAAT.ATTTT | X | 48624892 | 48624910 | 3.8     | .                  | .         | intergenic | 0.385  | rs789937779   | . | 2 |
| AAT.ATT     | X | 48740717 | 48740737 | 7       | .                  | .         | intergenic | 0.165  | rs786988680   | . | 2 |
| AAAAT.ATTTT | X | 48799129 | 48799145 | 3.4     | .                  | .         | intergenic | 0.16   | rs792340013   | . | 2 |
| AG.CT       | X | 48801987 | 48802000 | 7       | .                  | .         | intergenic | 0.184  | rs786224782   | . | 2 |
| AAAAC.GTTTT | X | 48889720 | 48889743 | 4       | ENSSSCT00000013457 | CCNB3     | intron     | .      | rs786973839   | . | 2 |
| AAAAC.GTTTT | X | 48889720 | 48889743 | 4       | ENSSSCT00000035730 | CCNB3     | intron     | .      | rs786973839   | . | 2 |
| AAAAG.CTTT  | X | 48920252 | 48920270 | 3.8     | .                  | .         | intergenic | .      | rs788661283   | . | 2 |
| AAC.GTT     | X | 48957362 | 48957375 | 4.66667 | ENSSSCT00000013458 | .         | intron     | .      | rs786784976   | . | 4 |
| AT.AT       | X | 48994774 | 48994786 | 6.5     | ENSSSCT00000013458 | .         | intron     | .      | 282497 rs7872 | . | 2 |
| AT.AT       | X | 49054855 | 49054874 | 10      | ENSSSCT00000013458 | .         | intron     | 0.978  | rs788960456   | . | 3 |
| AG.CT       | X | 49127104 | 49127128 | 12.5    | .                  | .         | intergenic | 0.134  | 305087 rs7921 | . | 4 |
| AATG.CATT   | X | 49214980 | 49215000 | 5.25    | .                  | .         | intergenic | 0.183  | rs790786205   | . | 2 |
| AT.AT       | X | 49353169 | 49353198 | 15      | .                  | .         | intergenic | 0.239  | rs791524335   | . | 2 |
| AAT.ATT     | X | 49597802 | 49597820 | 6.33333 | .                  | .         | intergenic | 0.161  | rs792412282   | . | 2 |
| AAG.CTT     | X | 49653988 | 49654003 | 5.33333 | .                  | .         | intergenic | .      | rs789461783   | . | 2 |
| AC.GT       | X | 50006282 | 50006294 | 6.5     | .                  | .         | intergenic | 0.296  | rs786760175   | . | 3 |
| AG.CT       | X | 50389150 | 50389170 | 10.5    | .                  | .         | intergenic | .      | rs788426983   | . | 2 |



|              |   |          |          |         |                    |         |          |            |        |                  |   |
|--------------|---|----------|----------|---------|--------------------|---------|----------|------------|--------|------------------|---|
| AAAAT.ATTTT  | X | 50515676 | 50515697 | 4.4     | .                  | .       | .        | intergenic | .      | rs790591914      | 2 |
| AT.AT        | X | 50550137 | 50550152 | 8       | .                  | .       | .        | intergenic | .      | rs792178346      | 2 |
| AT.AT        | X | 50555730 | 50555739 | 5       | .                  | .       | .        | intergenic | 0.094  | rs786766926      | 3 |
| AAAAC.GTTTT  | X | 50709174 | 50709203 | 6       | .                  | .       | .        | intergenic | 0.176  | rs787692147      | 2 |
| AT.AT        | X | 50723851 | 50723869 | 9.5     | .                  | .       | .        | intergenic | .      | .                | 2 |
| ACC.GGT      | X | 50894362 | 50894375 | 4.66667 | .                  | .       | .        | intergenic | 0.057  | rs788184220      | 2 |
| AT.AT        | X | 50980195 | 50980210 | 8       | .                  | .       | .        | intergenic | .      | rs786964156      | 2 |
| AT.AT        | X | 51001066 | 51001075 | 5       | .                  | .       | .        | intergenic | .      | rs793641251      | 2 |
| AAAC.GTTT    | X | 51218405 | 51218431 | 6.75    | .                  | .       | .        | intergenic | 0.088  | rs787635637      | 3 |
| AC.GT        | X | 51340559 | 51340574 | 8       | .                  | .       | .        | intergenic | 0.337  | rs788498102      | 6 |
| AC.GT        | X | 51390452 | 51390465 | 7       | ENSSSCT00000033938 | GPR173  | intron   |            | 0.184  | rs791598326      | 2 |
| AAAAT.ATTTT  | X | 51703606 | 51703637 | 6.4     | ENSSSCT00000034912 | SMC1A   | intron   |            | 0.415  | rs792206716      | 2 |
| AAAAT.ATTTT  | X | 51703606 | 51703637 | 6.4     | ENSSSCT00000033805 | RIBC1   | intron   |            | 0.415  | rs792206716      | 2 |
| AAAAT.ATTTT  | X | 51703606 | 51703637 | 6.4     | ENSSSCT00000033717 | .       | promoter |            | 0.415  | rs792206716      | 2 |
| AAAAT.ATTTT  | X | 51703606 | 51703637 | 6.4     | ENSSSCT00000033262 | .       | promoter |            | 0.415  | rs792206716      | 2 |
| AAAAT.ATTTT  | X | 51703606 | 51703637 | 6.4     | ENSSSCT00000035966 | .       | promoter |            | 0.415  | rs792206716      | 2 |
| AAAAT.ATTTT  | X | 51703606 | 51703637 | 6.4     | ENSSSCT00000028659 | .       | promoter |            | 0.415  | rs792206716      | 2 |
| AAAAT.ATTTT  | X | 51703606 | 51703637 | 6.4     | ENSSSCT00000013478 | .       | promoter |            | 0.415  | rs792206716      | 2 |
| AAC.GTT      | X | 51885038 | 51885060 | 7.66667 | ENSSSCT00000034630 | HUWE1   | intron   |            | 0.782  | rs790406966      | 2 |
| AAC.GTT      | X | 51885038 | 51885060 | 7.66667 | ENSSSCT00000035055 | HUWE1   | intron   |            | 0.782  | rs790406966      | 2 |
| AAC.GTT      | X | 51885038 | 51885060 | 7.66667 | ENSSSCT00000013481 | HUWE1   | intron   |            | 0.782  | rs790406966      | 2 |
| AAC.GTT      | X | 51885038 | 51885060 | 7.66667 | ENSSSCT00000032330 | HUWE1   | intron   |            | 0.782  | rs790406966      | 2 |
| ACC.GGT      | X | 51992675 | 51992686 | 4       | .                  | .       | .        | intergenic | .      | rs792431099      | 2 |
| AC.GT        | X | 52896611 | 52896626 | 8       | ENSSSCT00000013486 | WNK3    | intron   |            | .      | rs790756884      | 2 |
| AC.GT        | X | 52896611 | 52896626 | 8       | ENSSSCT00000034044 | WNK3    | intron   |            | .      | rs790756884      | 2 |
| AG.CT        | X | 52981915 | 52981933 | 9.5     | .                  | .       | .        | intergenic | 0.236  | rs786958891      | 4 |
| AT.AT        | X | 53110969 | 53110980 | 6       | .                  | .       | .        | intergenic | .      | rs790055442      | 2 |
| AC.GT        | X | 53243802 | 53243816 | 7.5     | .                  | .       | .        | intergenic | .      | rs788642381      | 2 |
| AAAT.ATTT    | X | 54077231 | 54077251 | 5.25    | .                  | .       | .        | intergenic | .      | rs787588125      | 2 |
| AG.CT        | X | 55283934 | 55283948 | 7.5     | .                  | .       | .        | intergenic | .      | rs793506657      | 2 |
| AAAAC.GTTTT  | X | 55912666 | 55912687 | 4.4     | .                  | .       | .        | intergenic | .      | rs788733873      | 2 |
| AAC.GTT      | X | 56012734 | 56012753 | 6.66667 | .                  | .       | .        | intergenic | .      | rs787687596      | 2 |
| AAAC.GTTT    | X | 56160831 | 56160853 | 5.75    | .                  | .       | .        | intergenic | .      | rs791048923      | 2 |
| AAC.GTT      | X | 56270907 | 56270934 | 9.33333 | .                  | .       | .        | intergenic | .      | rs789499714      | 2 |
| AAC.GTT      | X | 56617365 | 56617387 | 7.66667 | ENSSSCT00000033812 | ARHGEF9 | intron   |            | .      | rs789732194      | 2 |
| AAC.GTT      | X | 56617365 | 56617387 | 7.66667 | ENSSSCT00000033580 | ARHGEF9 | intron   |            | .      | rs789732194      | 2 |
| AAC.GTT      | X | 56617365 | 56617387 | 7.66667 | ENSSSCT00000013519 | ARHGEF9 | intron   |            | .      | rs789732194      | 2 |
| AAC.GTT      | X | 56617365 | 56617387 | 7.66667 | ENSSSCT00000033226 | ARHGEF9 | intron   |            | .      | rs789732194      | 2 |
| AAC.GTT      | X | 56617365 | 56617387 | 7.66667 | ENSSSCT00000035007 | ARHGEF9 | intron   |            | .      | rs789732194      | 2 |
| AG.CT        | X | 56825471 | 56825511 | 20.5    | .                  | .       | .        | intergenic | 0.212  | rs787666160      | 3 |
| AAT.ATT      | X | 56852785 | 56852802 | 6       | .                  | .       | .        | intergenic | .      | rs791749371      | 2 |
| AT.AT        | X | 57006481 | 57006494 | 7       | .                  | .       | .        | intergenic | .      | rs792233 rs7911  | 2 |
| AG.CT        | X | 57183539 | 57183551 | 6.5     | .                  | .       | .        | intergenic | .      | .                | 2 |
| AC.GT        | X | 57683687 | 57683705 | 9.5     | ENSSSCT00000032193 | ZC4H2   | intron   |            | 0.214  | rs790965704      | 2 |
| AC.GT        | X | 57989487 | 57989499 | 6.5     | .                  | .       | .        | intergenic | .      | rs787253601      | 2 |
| AT.AT        | X | 58180293 | 58180321 | 14.5    | ENSSSCT00000013524 | ZC3H12B | intron   |            | 0.192  | rs789544291      | 2 |
| AG.CT        | X | 58198170 | 58198184 | 7.5     | ENSSSCT00000013524 | ZC3H12B | intron   |            | .      | rs793608651      | 2 |
| AC.GT        | X | 58409470 | 58409483 | 7       | .                  | .       | .        | intergenic | .      | .                | 2 |
| AAAAAT.ATTTT | X | 58441694 | 58441715 | 3.66667 | .                  | .       | .        | intergenic | 0.193  | rs790820786      | 2 |
| AC.GT        | X | 58455381 | 58455403 | 11.5    | .                  | .       | .        | intergenic | .      | rs792384781      | 2 |
| AC.GT        | X | 58486018 | 58486051 | 17      | ENSSSCT00000034603 | MSN     | intron   |            | 0.355  | rs792100215      | 2 |
| AAGC.CCTT    | X | 58743506 | 58743524 | 4.75    | .                  | .       | .        | intergenic | 0.321  | rs787944163      | 2 |
| AG.CT        | X | 58783062 | 58783075 | 7       | .                  | .       | .        | intergenic | 0.059  | rs788616054      | 3 |
| AAAT.ATTT    | X | 58893252 | 58893263 | 3       | ENSSSCT00000013520 | HEPH    | promoter |            | -0.042 | rs78780          | 2 |
| AAAT.ATTT    | X | 58893252 | 58893263 | 3       | ENSSSCT00000034250 | HEPH    | promoter |            | -0.042 | rs78780          | 2 |
| AAAAT.ATTTT  | X | 59060033 | 59060052 | 4       | .                  | .       | .        | intergenic | .      | .                | 2 |
| AT.AT        | X | 59113771 | 59113783 | 6.5     | .                  | .       | .        | intergenic | .      | rs789239446      | 2 |
| AAC.GTT      | X | 59412727 | 59412743 | 5.66667 | .                  | .       | .        | intergenic | .      | .                | 2 |
| AAG.CTT      | X | 60399370 | 60399384 | 5       | ENSSSCT00000013528 | AR      | intron   |            | .      | rs793429697      | 2 |
| AG.CT        | X | 60630427 | 60630443 | 8.5     | .                  | .       | .        | intergenic | .      | rs788226555      | 2 |
| AAT.ATT      | X | 60931187 | 60931200 | 4.66667 | .                  | .       | .        | intergenic | .      | rs791884275      | 2 |
| AAAC.GTTT    | X | 61376249 | 61376264 | 4       | .                  | .       | .        | intergenic | .      | rs787399676      | 2 |
| ACC.GGT      | X | 61431865 | 61431878 | 4.66667 | .                  | .       | .        | intergenic | .      | rs790126169      | 2 |
| AG.CT        | X | 61446124 | 61446135 | 6       | .                  | .       | .        | intergenic | 0.16   | rs791300667      | 3 |
| AAAC.GTTT    | X | 62094883 | 62094902 | 5       | .                  | .       | .        | intergenic | 0.105  | rs787242792      | 2 |
| AG.CT        | X | 62436155 | 62436184 | 15      | .                  | .       | .        | intergenic | .      | rs787968075      | 2 |
| AAAC.GTTT    | X | 62470960 | 62470996 | 9.25    | .                  | .       | .        | intergenic | 0.158  | rs7915378 rs7916 | 3 |
| AG.CT        | X | 62614845 | 62614855 | 5.5     | .                  | .       | .        | intergenic | 0.095  | rs787319455      | 2 |
| AATG.CATT    | X | 63127059 | 63127076 | 4.5     | ENSSSCT00000034708 | EDA     | intron   |            | 0.091  | rs788582524      | 2 |
| AATG.CATT    | X | 63127059 | 63127076 | 4.5     | ENSSSCT00000033545 | EDA     | intron   |            | 0.091  | rs788582524      | 2 |
| AG.CT        | X | 63485430 | 63485444 | 7.5     | .                  | .       | .        | intergenic | 0.167  | .                | 2 |
| AT.AT        | X | 63682597 | 63682608 | 6       | ENSSSCT00000013532 | DLG3    | intron   |            | 0.365  | rs791792379      | 2 |
| AC.GT        | X | 63686551 | 63686564 | 7       | ENSSSCT00000013532 | DLG3    | intron   |            | 0.48   | rs792217786      | 3 |
| AAAC.GTTT    | X | 64462753 | 64462772 | 5       | .                  | .       | .        | intergenic | 0.332  | rs791644106      | 2 |
| AAAAC.GTTTT  | X | 64484995 | 64485014 | 4       | .                  | .       | .        | intergenic | .      | rs789214604      | 2 |
| AC.GT        | X | 64629900 | 64629910 | 5.5     | .                  | .       | .        | intergenic | 0.539  | rs790505038      | 2 |
| AAAG.CTTT    | X | 64836696 | 64836709 | 3.5     | .                  | .       | .        | intergenic | 0.139  | .                | 2 |
| AAAC.GTTT    | X | 64955365 | 64955386 | 5.5     | .                  | .       | .        | intergenic | 0.432  | rs7888           | 2 |
| AAAC.GTTT    | X | 64982299 | 64982317 | 4.75    | ENSSSCT00000013561 | OGT     | intron   |            | 3.039  | rs792757274      | 2 |
| AAAC.GTTT    | X | 64982299 | 64982317 | 4.75    | ENSSSCT00000035659 | OGT     | intron   |            | 3.039  | rs792757274      | 2 |
| AAAC.GTTT    | X | 64982299 | 64982317 | 4.75    | ENSSSCT00000032783 | OGT     | intron   |            | 3.039  | rs792757274      | 2 |
| ATC.GAT      | X | 65020663 | 65020681 | 6.33333 | ENSSSCT00000034006 | ACRC    | promoter |            | -0.072 | rs7914314 rs7910 | 2 |
| AAC.GTT      | X | 65025130 | 65025142 | 4.33333 | ENSSSCT00000034006 | ACRC    | intron   |            | 0.266  | rs789634854      | 3 |
| AAC.GTT      | X | 65025130 | 65025142 | 4.33333 | ENSSSCT00000013559 | ACRC    | promoter |            | 0.266  | rs789634854      | 3 |

|             |   |          |          |         |                    |              |            |        |                 |   |   |
|-------------|---|----------|----------|---------|--------------------|--------------|------------|--------|-----------------|---|---|
| ACAT.ATGT   | X | 65389689 | 65389704 | 4       | .                  | .            | intergenic | 0.208  | .               | . | 2 |
| AAAC.GTTT   | X | 65400053 | 65400074 | 5.5     | .                  | .            | intergenic | .      | rs791620242     | . | 2 |
| ATCC.GGAT   | X | 65566986 | 65567021 | 9       | .                  | .            | intergenic | 0.207  | rs793148681     | . | 2 |
| AAAAC.GTTTT | X | 65941713 | 65941736 | 4.8     | .                  | .            | intergenic | 0.431  | rs791773164     | . | 2 |
| AATG.CATT   | X | 66091912 | 66091933 | 5.5     | ENSSSCT00000013570 | .            | intron     | 0.988  | rs788916292     | . | 2 |
| AAAAC.GTTTT | X | 66445214 | 66445232 | 3.8     | .                  | .            | intergenic | 0.274  | rs792978486     | . | 2 |
| AG.CT       | X | 66541199 | 66541214 | 8       | .                  | .            | intergenic | .      | rs787998638     | . | 2 |
| AAC.GTT     | X | 66562845 | 66562858 | 4.66667 | .                  | .            | intergenic | .      | rs787662462     | . | 3 |
| AC.GT       | X | 66699179 | 66699191 | 6.5     | .                  | .            | intergenic | .      | rs787300540     | . | 2 |
| AAAC.GTTT   | X | 66952756 | 66952777 | 5.5     | .                  | .            | intergenic | .      | rs793349905     | . | 2 |
| AT.AT       | X | 66972899 | 66972909 | 5.5     | ENSSSCT00000030959 | CDX4         | intron     | 0.243  | rs789920426     | . | 2 |
| AT.AT       | X | 66972899 | 66972909 | 5.5     | ENSSSCT00000034899 | CDX4         | intron     | 0.243  | rs789920426     | . | 2 |
| AT.AT       | X | 67054811 | 67054824 | 7       | ENSSSCT00000013576 | CHIC1        | intron     | 0.388  | rs791738866     | . | 3 |
| AT.AT       | X | 67054811 | 67054824 | 7       | ENSSSCT00000034312 | CHIC1        | intron     | 0.388  | rs791738866     | . | 3 |
| AT.AT       | X | 67054811 | 67054824 | 7       | ENSSSCT00000033759 | CHIC1        | intron     | 0.388  | rs791738866     | . | 3 |
| AAAAC.GTTTT | X | 67370573 | 67370591 | 3.8     | .                  | .            | intergenic | .      | rs787565489     | . | 2 |
| AAAT.ATTT   | X | 67391494 | 67391508 | 3.75    | ENSSSCT00000020222 | .            | promoter   | .      | rs788278582     | . | 2 |
| AAAT.ATTT   | X | 67545239 | 67545253 | 3.75    | .                  | .            | intergenic | .      | rs793600060     | . | 2 |
| AT.AT       | X | 67639602 | 67639629 | 14      | .                  | .            | intergenic | .      | rs792412868     | . | 5 |
| AAT.ATT     | X | 67655991 | 67656017 | 9       | .                  | .            | intergenic | .      | rs787611239     | . | 3 |
| AAAT.ATTT   | X | 68280378 | 68280407 | 7.5     | .                  | .            | intergenic | 0.278  | rs790307588     | . | 2 |
| AAAAC.GTTT  | X | 68384436 | 68384452 | 3.4     | .                  | .            | intergenic | 0.335  | .               | . | 2 |
| ACC.GGT     | X | 68392676 | 68392691 | 5.33333 | .                  | .            | intergenic | 0.098  | .               | . | 2 |
| AAAT.ATTT   | X | 68445285 | 68445300 | 4       | ENSSSCT00000036440 | ABC7         | intron     | 0.475  | rs786326208     | . | 2 |
| AAAT.ATTT   | X | 68445285 | 68445300 | 4       | ENSSSCT00000036358 | ABC7         | intron     | 0.475  | rs786326208     | . | 2 |
| AAAT.ATTT   | X | 68445285 | 68445300 | 4       | ENSSSCT00000032985 | ABC7         | intron     | 0.475  | rs786326208     | . | 2 |
| AAAT.ATTT   | X | 68445285 | 68445300 | 4       | ENSSSCT00000013585 | ABC7         | intron     | 0.475  | rs786326208     | . | 2 |
| AAAT.ATTT   | X | 68445285 | 68445300 | 4       | ENSSSCT00000033898 | ABC7         | intron     | 0.475  | rs786326208     | . | 2 |
| AAAAC.GTTT  | X | 68687380 | 68687397 | 3.6     | ENSSSCT00000013586 | UPRT         | promoter   | 0.236  | rs789434264     | . | 2 |
| AAAAC.GTTT  | X | 68687380 | 68687397 | 3.6     | ENSSSCT00000035125 | UPRT         | promoter   | 0.236  | rs789434264     | . | 2 |
| AAAAC.GTTT  | X | 68687380 | 68687397 | 3.6     | ENSSSCT00000033503 | UPRT         | promoter   | 0.236  | rs789434264     | . | 2 |
| AT.AT       | X | 69256911 | 69256929 | 9.5     | .                  | .            | intergenic | -0.044 | rs788079280     | . | 2 |
| AAAT.ATTT   | X | 70246369 | 70246387 | 4.75    | .                  | .            | intergenic | .      | rs723895 rs7901 | . | 2 |
| ACAT.ATGT   | X | 70430505 | 70430521 | 4.25    | ENSSSCT00000035999 | rs1242-77E2' | intron     | 0.275  | rs788575186     | . | 2 |
| ACAT.ATGT   | X | 70430505 | 70430521 | 4.25    | ENSSSCT00000036604 | ATRX         | intron     | 0.275  | rs788575186     | . | 2 |
| ACAT.ATGT   | X | 70430505 | 70430521 | 4.25    | ENSSSCT00000013595 | ATRX         | intron     | 0.275  | rs788575186     | . | 2 |
| AC.GT       | X | 70665103 | 70665119 | 8.5     | ENSSSCT00000036604 | ATRX         | intron     | 0.261  | rs788883380     | . | 2 |
| AC.GT       | X | 70665103 | 70665119 | 8.5     | ENSSSCT00000034791 | ATRX         | intron     | 0.261  | rs788883380     | . | 2 |
| AC.GT       | X | 70665103 | 70665119 | 8.5     | ENSSSCT00000013595 | ATRX         | intron     | 0.261  | rs788883380     | . | 2 |
| AC.GT       | X | 70681287 | 70681296 | 5       | ENSSSCT00000034747 | ATRX         | intron     | 0.454  | .               | . | 2 |
| AC.GT       | X | 70681287 | 70681296 | 5       | ENSSSCT00000036604 | ATRX         | intron     | 0.454  | .               | . | 2 |
| AC.GT       | X | 70681287 | 70681296 | 5       | ENSSSCT00000036526 | ATRX         | intron     | 0.454  | .               | . | 2 |
| AC.GT       | X | 70681287 | 70681296 | 5       | ENSSSCT00000013596 | ATRX         | intron     | 0.454  | .               | . | 2 |
| AC.GT       | X | 70681287 | 70681296 | 5       | ENSSSCT00000013595 | ATRX         | promoter   | 0.454  | .               | . | 2 |
| AAAAC.GTTTT | X | 70813006 | 70813031 | 4.33333 | ENSSSCT00000035022 | MAGT1        | 3'utr      | 0.564  | rs791347800     | . | 2 |
| AG.CT       | X | 71079040 | 71079064 | 12.5    | .                  | .            | intergenic | .      | rs792850813     | . | 4 |
| AC.GT       | X | 71252168 | 71252177 | 5       | .                  | .            | intergenic | .      | .               | . | 2 |
| AAAT.ATTT   | X | 71327075 | 71327103 | 7.25    | ENSSSCT00000029310 | TAF9B        | intron     | .      | rs347660 rs7886 | . | 2 |
| AAAT.ATTT   | X | 71327075 | 71327103 | 7.25    | ENSSSCT00000033907 | TAF9B        | intron     | .      | rs347660 rs7886 | . | 2 |
| AAAT.ATTT   | X | 71327075 | 71327103 | 7.25    | ENSSSCT00000023290 | TAF9B        | intron     | .      | rs347660 rs7886 | . | 2 |
| AC.GT       | X | 71734736 | 71734753 | 9       | .                  | .            | intergenic | .      | rs791218449     | . | 2 |
| AAT.ATT     | X | 71746209 | 71746223 | 5       | .                  | .            | intergenic | 0.17   | rs792701856     | . | 2 |
| AT.AT       | X | 71769157 | 71769168 | 6       | .                  | .            | intergenic | .      | rs788532882     | . | 2 |
| AT.AT       | X | 71842458 | 71842469 | 6       | .                  | .            | intergenic | .      | rs792985978     | . | 2 |
| AAC.GTT     | X | 72337387 | 72337399 | 4.33333 | .                  | .            | intergenic | .      | rs787111826     | . | 2 |
| AAAC.GTTT   | X | 72338356 | 72338370 | 3.75    | .                  | .            | intergenic | .      | rs790706996     | . | 2 |
| AAAAT.ATTTT | X | 72376884 | 72376898 | 3       | .                  | .            | intergenic | .      | rs789557316     | . | 2 |
| AAT.ATT     | X | 72387554 | 72387566 | 4.33333 | .                  | .            | intergenic | .      | rs791364033     | . | 2 |
| AAATG.CATTT | X | 72433095 | 72433122 | 5.6     | .                  | .            | intergenic | .      | rs787617817     | . | 2 |
| AAAC.GTTT   | X | 72451133 | 72451147 | 3.75    | .                  | .            | intergenic | .      | .               | . | 2 |
| AAT.ATT     | X | 72477193 | 72477211 | 6.33333 | .                  | .            | intergenic | 0.025  | rs790657483     | . | 2 |
| AAAC.GTTT   | X | 72611180 | 72611204 | 6.25    | .                  | .            | intergenic | .      | rs787830843     | . | 2 |
| AT.AT       | X | 72729237 | 72729246 | 5       | .                  | .            | intergenic | .      | rs790516349     | . | 2 |
| AC.GT       | X | 72809015 | 72809024 | 5       | .                  | .            | intergenic | -0.229 | rs786603809     | . | 2 |
| AAC.GTT     | X | 72827991 | 72828011 | 7       | .                  | .            | intergenic | .      | rs789357093     | . | 2 |
| AC.GT       | X | 73528807 | 73528825 | 9.5     | .                  | .            | intergenic | .      | .               | . | 4 |
| AC.GT       | X | 73723153 | 73723163 | 5.5     | .                  | .            | intergenic | .      | .               | . | 2 |
| AG.CT       | X | 73770849 | 73770865 | 8.5     | .                  | .            | intergenic | .      | rs789773029     | . | 2 |
| AT.AT       | X | 73886236 | 73886245 | 5       | ENSSSCT00000033871 | rs1242-123K1 | intron     | 0.138  | .               | . | 2 |
| AT.AT       | X | 73886236 | 73886245 | 5       | ENSSSCT00000033174 | rs1242-123K1 | intron     | 0.138  | .               | . | 2 |
| AT.AT       | X | 73886236 | 73886245 | 5       | ENSSSCT00000031239 | rs1242-123K1 | intron     | 0.138  | .               | . | 2 |
| AAT.ATT     | X | 73972617 | 73972630 | 4.66667 | ENSSSCT00000033174 | rs1242-123K1 | intron     | 0.142  | .               | . | 2 |
| AAT.ATT     | X | 73972617 | 73972630 | 4.66667 | ENSSSCT00000031239 | rs1242-123K1 | intron     | 0.142  | .               | . | 2 |
| AAAC.GTTT   | X | 74247486 | 74247500 | 3.75    | .                  | .            | intergenic | 0.27   | rs302431 rs7932 | . | 2 |
| AAAAT.ATTTT | X | 74377712 | 74377728 | 3.4     | .                  | .            | intergenic | .      | rs793428251     | . | 2 |
| AAT.ATT     | X | 74423790 | 74423809 | 6.66667 | .                  | .            | intergenic | .      | rs793010287     | . | 2 |
| AC.GT       | X | 74797907 | 74797923 | 8.5     | .                  | .            | intergenic | .      | rs787158234     | . | 4 |
| AG.CT       | X | 74810517 | 74810529 | 6.5     | .                  | .            | intergenic | .      | .               | . | 2 |
| AAC.GTT     | X | 75033179 | 75033196 | 6       | .                  | .            | intergenic | .      | rs789327056     | . | 2 |
| AAC.GTT     | X | 75048010 | 75048040 | 10.3333 | .                  | .            | intergenic | .      | rs792288922     | . | 2 |
| AAAAC.GTTTT | X | 75110632 | 75110660 | 5.8     | .                  | .            | intergenic | .      | rs789323168     | . | 2 |
| AT.AT       | X | 75541614 | 75541627 | 7       | .                  | .            | intergenic | .      | rs792090473     | . | 2 |
| AT.AT       | X | 75551020 | 75551031 | 6       | .                  | .            | intergenic | .      | rs790752513     | . | 2 |
| AAAT.ATTT   | X | 75575793 | 75575811 | 4.75    | .                  | .            | intergenic | .      | .               | . | 2 |

|               |   |          |          |         |                    |         |            |        |                 |   |
|---------------|---|----------|----------|---------|--------------------|---------|------------|--------|-----------------|---|
| AAT.ATT       | X | 76258124 | 76258141 | 6       | .                  | .       | intergenic | .      | rs788566218     | 4 |
| AAAAT.ATTTT   | X | 76453880 | 76453903 | 4.8     | .                  | .       | intergenic | .      | rs793462338     | 2 |
| AG.CT         | X | 76578223 | 76578243 | 10.5    | .                  | .       | intergenic | .      | rs793429248     | 3 |
| AAAC.GTTT     | X | 76721441 | 76721471 | 7.75    | .                  | .       | intergenic | -0.036 | rs73506 rs7898  | 2 |
| AG.CT         | X | 76778848 | 76778858 | 5.5     | .                  | .       | intergenic | .      | rs792010964     | 2 |
| AT.AT         | X | 77182594 | 77182605 | 6       | ENSSSCT00000032934 | RPS6KA6 | intron     | .      | rs793318647     | 2 |
| AT.AT         | X | 77182594 | 77182605 | 6       | ENSSSCT00000013622 | RPS6KA6 | intron     | .      | rs793318647     | 2 |
| AAAC.GTTT     | X | 77252488 | 77252514 | 6.75    | ENSSSCT00000013622 | RPS6KA6 | intron     | .      | rs791505897     | 2 |
| AAAC.GTTT     | X | 77252488 | 77252514 | 6.75    | ENSSSCT00000032934 | RPS6KA6 | intron     | .      | rs791505897     | 2 |
| AG.CT         | X | 77302879 | 77302899 | 10.5    | .                  | .       | intergenic | .      | .               | 2 |
| AT.AT         | X | 77409737 | 77409752 | 8       | .                  | .       | intergenic | 0.15   | rs793559558     | 2 |
| AAAAC.GTTTT   | X | 77426728 | 77426760 | 6.6     | .                  | .       | intergenic | 0.876  | .               | 2 |
| AAAG.CTTT     | X | 77469995 | 77470021 | 6.75    | .                  | .       | intergenic | -0.029 | .               | 2 |
| AT.AT         | X | 77674789 | 77674808 | 10      | .                  | .       | intergenic | .      | rs791966059     | 2 |
| AGAT.ATCT     | X | 77850649 | 77850668 | 5       | .                  | .       | intergenic | .      | rs789515026     | 2 |
| AG.CT         | X | 77883085 | 77883104 | 10      | .                  | .       | intergenic | .      | rs786742640     | 2 |
| AT.AT         | X | 77886868 | 77886877 | 5       | .                  | .       | intergenic | .      | rs789033272     | 2 |
| AAAT.ATTT     | X | 77917804 | 77917819 | 4       | .                  | .       | intergenic | 0.373  | rs791299010     | 2 |
| AG.CT         | X | 77970396 | 77970408 | 6.5     | .                  | .       | intergenic | .      | rs791279021     | 2 |
| AAAT.ATTT     | X | 78198920 | 78198937 | 4.5     | ENSSSCT00000029661 | .       | intron     | .      | .               | 2 |
| AT.AT         | X | 78271280 | 78271301 | 11      | .                  | .       | intergenic | .      | rs786582178     | 2 |
| AT.AT         | X | 78417726 | 78417737 | 6       | .                  | .       | intergenic | .      | rs790941312     | 2 |
| AG.CT         | X | 78471671 | 78471693 | 11.5    | .                  | .       | intergenic | 0.24   | rs692863645     | 2 |
| AC.GT         | X | 78613889 | 78613898 | 5       | .                  | .       | intergenic | .      | rs791690546     | 2 |
| AAG.CTT       | X | 78640813 | 78640824 | 4       | .                  | .       | intergenic | -0.031 | .               | 2 |
| AT.AT         | X | 78714289 | 78714301 | 6.5     | .                  | .       | intergenic | 0.259  | rs787555762     | 2 |
| AAT.ATT       | X | 79790981 | 79791006 | 8.66667 | .                  | .       | intergenic | -0.012 | rs793417337     | 2 |
| AG.CT         | X | 80433727 | 80433741 | 7.5     | .                  | .       | intergenic | .      | .               | 3 |
| AGAT.ATCT     | X | 80752189 | 80752222 | 8.5     | .                  | .       | intergenic | .      | rs735620 rs7937 | 2 |
| AATG.CATT     | X | 80770513 | 80770539 | 6.75    | .                  | .       | intergenic | .      | rs787993169     | 2 |
| AT.AT         | X | 80871968 | 80871978 | 5.5     | .                  | .       | intergenic | .      | .               | 2 |
| AAAT.ATTT     | X | 80877211 | 80877232 | 5.5     | .                  | .       | intergenic | .      | rs789982113     | 2 |
| AAC.GTT       | X | 80945255 | 80945270 | 5.33333 | ENSSSCT00000013634 | KLHL4   | intron     | .      | rs792596337     | 2 |
| AC.GT         | X | 80971422 | 80971432 | 5.5     | ENSSSCT00000013634 | KLHL4   | intron     | 3.287  | rs793375645     | 2 |
| AAC.GTT       | X | 81037779 | 81037790 | 4       | .                  | .       | intergenic | .      | .               | 2 |
| AT.AT         | X | 81075568 | 81075578 | 5.5     | .                  | .       | intergenic | .      | rs789055204     | 4 |
| AAAT.ATTT     | X | 81219804 | 81219824 | 5.25    | .                  | .       | intergenic | .      | rs791822041     | 2 |
| AAC.GTT       | X | 81297953 | 81297969 | 5.66667 | .                  | .       | intergenic | .      | rs791214461     | 2 |
| AC.GT         | X | 81423436 | 81423457 | 11      | .                  | .       | intergenic | .      | .               | 5 |
| AT.AT         | X | 81640264 | 81640284 | 10.5    | .                  | .       | intergenic | .      | rs791138283     | 2 |
| AC.GT         | X | 82201715 | 82201725 | 5.5     | .                  | .       | intergenic | .      | rs789087231     | 2 |
| AC.GT         | X | 82646963 | 82646977 | 7.5     | .                  | .       | intergenic | .      | rs786596897     | 2 |
| AT.AT         | X | 82661958 | 82661968 | 5.5     | .                  | .       | intergenic | .      | rs792221130     | 2 |
| AT.AT         | X | 82701367 | 82701376 | 5       | .                  | .       | intergenic | .      | rs788521438     | 2 |
| AAAT.ATTT     | X | 83109358 | 83109377 | 5       | .                  | .       | intergenic | .      | rs788760320     | 2 |
| AAAT.ATTT     | X | 84691923 | 84691938 | 4       | .                  | .       | intergenic | .      | rs792454875     | 2 |
| AAAT.ATTT     | X | 84751574 | 84751597 | 6       | .                  | .       | intergenic | 0.217  | rs792293298     | 2 |
| AAAC.GTTT     | X | 84890326 | 84890358 | 8.25    | .                  | .       | intergenic | 0.152  | rs791625988     | 2 |
| AC.GT         | X | 84962729 | 84962741 | 6.5     | .                  | .       | intergenic | 0.179  | .               | 2 |
| AC.GT         | X | 85196155 | 85196168 | 7       | .                  | .       | intergenic | 0.361  | .               | 2 |
| AAAAAC.GTTTTT | X | 85232036 | 85232060 | 4.16667 | .                  | .       | intergenic | .      | rs788091451     | 2 |
| AAAAAC.GTTTTT | X | 85251358 | 85251375 | 3.6     | .                  | .       | intergenic | .      | rs788832750     | 2 |
| AC.GT         | X | 85263535 | 85263561 | 13.5    | .                  | .       | intergenic | .      | rs788312270     | 4 |
| AATC.GATT     | X | 85587348 | 85587371 | 6       | .                  | .       | intergenic | 0.052  | rs787067504     | 2 |
| AG.CT         | X | 85638738 | 85638749 | 6       | .                  | .       | intergenic | 0.388  | rs787667382     | 3 |
| AAAT.ATTT     | X | 85681234 | 85681248 | 3.75    | .                  | .       | intergenic | 0.271  | rs793746266     | 2 |
| AAAC.GTTT     | X | 85767148 | 85767179 | 8       | .                  | .       | intergenic | 0.239  | rs788303683     | 2 |
| AC.GT         | X | 85785075 | 85785084 | 5       | .                  | .       | intergenic | 0.005  | .               | 2 |
| AT.AT         | X | 85884987 | 85884998 | 6       | .                  | .       | intergenic | .      | rs787903219     | 2 |
| AG.CT         | X | 85996454 | 85996463 | 5       | ENSSSCT00000013641 | DIAPH2  | intron     | 0.045  | rs788735007     | 2 |
| AC.GT         | X | 86072902 | 86072923 | 11      | ENSSSCT00000013641 | DIAPH2  | intron     | 0.103  | rs791976114     | 2 |
| AAAC.GTTT     | X | 86084158 | 86084178 | 5.25    | ENSSSCT00000013641 | DIAPH2  | intron     | 0.065  | .               | 2 |
| AC.GT         | X | 86424582 | 86424594 | 6.5     | ENSSSCT00000028335 | .       | intron     | 0.176  | rs793010480     | 2 |
| ACT.AGT       | X | 86462304 | 86462325 | 7.33333 | ENSSSCT00000028335 | .       | intron     | 0.313  | .               | 2 |
| AGAT.ATCT     | X | 86497780 | 86497806 | 6.75    | ENSSSCT00000028335 | .       | intron     | 0.356  | .               | 3 |
| AC.GT         | X | 86678395 | 86678409 | 7.5     | ENSSSCT00000028335 | .       | intron     | 0.267  | rs792746525     | 2 |
| AC.GT         | X | 86914676 | 86914688 | 6.5     | .                  | .       | intergenic | 0.189  | rs790822403     | 2 |
| AAAC.GTTT     | X | 86994934 | 86994948 | 3.75    | .                  | .       | intergenic | 0.082  | .               | 2 |
| AT.AT         | X | 87171089 | 87171102 | 7       | .                  | .       | intergenic | 0.112  | .               | 2 |
| AC.GT         | X | 87346134 | 87346145 | 6       | .                  | .       | intergenic | .      | rs787904480     | 3 |
| AAAAC.GTTTTT  | X | 87704040 | 87704073 | 6.8     | .                  | .       | intergenic | 0.046  | rs758841 rs7902 | 2 |
| AT.AT         | X | 87763440 | 87763458 | 9.5     | .                  | .       | intergenic | 0.051  | rs789563160     | 2 |
| AAAC.GTTT     | X | 87804721 | 87804734 | 3.5     | .                  | .       | intergenic | -0.081 | rs705683 rs7935 | 2 |
| AAAT.ATTT     | X | 87827744 | 87827759 | 4       | .                  | .       | intergenic | .      | rs793566937     | 2 |
| AGAT.ATCT     | X | 87849896 | 87849914 | 4.75    | .                  | .       | intergenic | .      | rs791133929     | 2 |
| AAAG.CTTT     | X | 87924537 | 87924549 | 3.25    | .                  | .       | intergenic | 0.212  | .               | 2 |
| AAAT.ATTT     | X | 88091977 | 88091997 | 5.25    | .                  | .       | intergenic | 0.152  | .               | 3 |
| AAAT.ATTT     | X | 88178346 | 88178360 | 3.75    | .                  | .       | intergenic | -0.256 | rs786433735     | 2 |
| AAAC.GTTT     | X | 88357937 | 88357952 | 4       | .                  | .       | intergenic | 0.197  | rs792416875     | 2 |
| AT.AT         | X | 88366850 | 88366860 | 5.5     | .                  | .       | intergenic | .      | rs789203542     | 2 |
| AAG.CTT       | X | 88417897 | 88417912 | 5.33333 | .                  | .       | intergenic | 0.059  | .               | 2 |
| AT.AT         | X | 88537354 | 88537365 | 6       | .                  | .       | intergenic | -0.071 | rs791451474     | 2 |
| AT.AT         | X | 88546575 | 88546587 | 6.5     | .                  | .       | intergenic | 0.068  | rs758104 rs7872 | 2 |
| AT.AT         | X | 88591540 | 88591552 | 6.5     | .                  | .       | intergenic | 0.057  | .               | 2 |

|             |   |          |          |         |                    |       |            |        |                 |   |
|-------------|---|----------|----------|---------|--------------------|-------|------------|--------|-----------------|---|
| AAAC.GTTT   | X | 88621593 | 88621608 | 4       | .                  | .     | intergenic | 0.12   | rs787942322     | 2 |
| AAT.ATT     | X | 88626441 | 88626462 | 7.33333 | .                  | .     | intergenic | 0.192  | .               | 2 |
| AC.GT       | X | 88944350 | 88944366 | 8.5     | .                  | .     | intergenic | .      | rs789789067     | 2 |
| AAAAT.ATTTT | X | 88968854 | 88968871 | 3.6     | .                  | .     | intergenic | 0.365  | rs791565972     | 2 |
| AT.AT       | X | 89040476 | 89040487 | 6       | .                  | .     | intergenic | 0.221  | rs793399678     | 2 |
| AG.CT       | X | 89083959 | 89083979 | 10.5    | .                  | .     | intergenic | -0.04  | rs792963307     | 2 |
| AAC.GTT     | X | 89159435 | 89159463 | 9.66667 | .                  | .     | intergenic | -0.062 | rs787206193     | 4 |
| AAAT.ATTT   | X | 89273313 | 89273331 | 4.75    | .                  | .     | intergenic | 0.044  | rs791160654     | 2 |
| AGAT.ATCT   | X | 89286220 | 89286243 | 6       | .                  | .     | intergenic | 0.074  | rs788742084     | 2 |
| ATC.GAT     | X | 89941478 | 89941494 | 5.66667 | ENSSSCT00000013646 | .     | intron     | 0.37   | rs792077542     | 2 |
| AAAC.GTTT   | X | 90140448 | 90140474 | 6.75    | .                  | .     | intergenic | 0.458  | rs787833304     | 4 |
| AC.GT       | X | 90210338 | 90210367 | 15      | .                  | .     | intergenic | 1.668  | rs792946364     | 4 |
| AC.GT       | X | 90321507 | 90321518 | 6       | .                  | .     | intergenic | 0.465  | rs66178 rs7913  | 2 |
| AAAT.ATTT   | X | 90351663 | 90351683 | 5.25    | .                  | .     | intergenic | .      | rs786779991     | 2 |
| AAAT.ATTT   | X | 90370413 | 90370431 | 4.75    | .                  | .     | intergenic | .      | rs792093689     | 2 |
| AAACC.GGTTT | X | 90399818 | 90399837 | 4       | ENSSSCT00000034722 | CSTF2 | intron     | 0.238  | rs789305427     | 2 |
| AAACC.GGTTT | X | 90399818 | 90399837 | 4       | ENSSSCT00000034276 | CSTF2 | intron     | 0.238  | rs789305427     | 2 |
| AAACC.GGTTT | X | 90399818 | 90399837 | 4       | ENSSSCT00000034376 | CSTF2 | intron     | 0.238  | rs789305427     | 2 |
| AAACC.GGTTT | X | 90399818 | 90399837 | 4       | ENSSSCT00000027214 | CSTF2 | intron     | 0.238  | rs789305427     | 2 |
| AAACC.GGTTT | X | 90399818 | 90399837 | 4       | ENSSSCT00000013653 | CSTF2 | intron     | 0.238  | rs789305427     | 2 |
| AAACC.GGTTT | X | 90399818 | 90399837 | 4       | ENSSSCT00000033718 | CSTF2 | intron     | 0.238  | rs789305427     | 2 |
| AAACC.GGTTT | X | 90399818 | 90399837 | 4       | ENSSSCT00000035264 | CSTF2 | intron     | 0.238  | rs789305427     | 2 |
| AAAC.GTTT   | X | 90705802 | 90705825 | 6       | ENSSSCT00000013658 | CENPI | intron     | .      | .               | 2 |
| AAAC.GTTT   | X | 90705802 | 90705825 | 6       | ENSSSCT00000032805 | CENPI | intron     | .      | .               | 2 |
| AAAC.GTTT   | X | 90705802 | 90705825 | 6       | ENSSSCT00000035785 | CENPI | promoter   | .      | .               | 2 |
| AAT.ATT     | X | 90771894 | 90771912 | 6.33333 | .                  | .     | intergenic | .      | rs791382239     | 2 |
| AAAT.ATTT   | X | 90774615 | 90774638 | 6       | .                  | .     | intergenic | 0.205  | rs789060664     | 2 |
| AAC.GTT     | X | 90903174 | 90903188 | 5       | ENSSSCT00000032924 | DRP2  | promoter   | 0.341  | rs786762987     | 2 |
| AAC.GTT     | X | 90903174 | 90903188 | 5       | ENSSSCT00000033286 | DRP2  | promoter   | 0.341  | rs786762987     | 2 |
| AAC.GTT     | X | 90903174 | 90903188 | 5       | ENSSSCT00000034812 | DRP2  | promoter   | 0.341  | rs786762987     | 2 |
| AAC.GTT     | X | 90903174 | 90903188 | 5       | ENSSSCT00000033320 | DRP2  | promoter   | 0.341  | rs786762987     | 2 |
| AAC.GTT     | X | 90903174 | 90903188 | 5       | ENSSSCT00000036590 | DRP2  | promoter   | 0.341  | rs786762987     | 2 |
| AAAAC.GTTTT | X | 90978438 | 90978459 | 3.66667 | ENSSSCT00000013660 | TAF7L | intron     | 0.341  | rs790382962     | 2 |
| AAAAC.GTTTT | X | 90978438 | 90978459 | 3.66667 | ENSSSCT00000032946 | TAF7L | intron     | 0.341  | rs790382962     | 2 |
| AC.GT       | X | 91039664 | 91039696 | 16.5    | .                  | .     | intergenic | 0.406  | rs786583234     | 2 |
| AATT.AATT   | X | 91104403 | 91104428 | 6.5     | .                  | .     | intergenic | .      | rs792729921     | 2 |
| AT.AT       | X | 91166172 | 91166183 | 6       | .                  | .     | intergenic | 0.146  | rs789592035     | 2 |
| AC.GT       | X | 91361386 | 91361408 | 11.5    | .                  | .     | intergenic | .      | rs789888369     | 3 |
| AC.GT       | X | 91452428 | 91452447 | 10      | .                  | .     | intergenic | .      | .               | 2 |
| ACAT.ATGT   | X | 91468249 | 91468274 | 6.5     | .                  | .     | intergenic | .      | rs351302 rs7921 | 2 |
| AT.AT       | X | 91540863 | 91540874 | 6       | .                  | .     | intergenic | 0.217  | rs792753400     | 3 |
| AAT.ATT     | X | 91670013 | 91670027 | 5       | .                  | .     | intergenic | 0.123  | rs792253691     | 2 |
| AT.AT       | X | 91690894 | 91690909 | 8       | .                  | .     | intergenic | .      | .               | 2 |
| AAAAG.CTTTT | X | 91820080 | 91820097 | 3.6     | .                  | .     | intergenic | .      | rs790651578     | 2 |
| AG.CT       | X | 91834159 | 91834173 | 7.5     | .                  | .     | intergenic | .      | rs789875055     | 2 |
| AC.GT       | X | 91842449 | 91842458 | 5       | .                  | .     | intergenic | .      | rs786681627     | 3 |
| AT.AT       | X | 91893787 | 91893798 | 6       | .                  | .     | intergenic | 0.087  | rs793104776     | 2 |
| AT.AT       | X | 91899312 | 91899322 | 5.5     | .                  | .     | intergenic | -0.024 | rs792358222     | 3 |
| AC.GT       | X | 91904327 | 91904337 | 5.5     | .                  | .     | intergenic | .      | .               | 4 |
| AT.AT       | X | 92163159 | 92163180 | 11      | .                  | .     | intergenic | 0.086  | rs787267750     | 2 |
| AAATT.AATTT | X | 92380684 | 92380700 | 3.4     | .                  | .     | intergenic | 0.253  | rs787459905     | 2 |
| AT.AT       | X | 92691872 | 92691881 | 5       | .                  | .     | intergenic | 0.067  | .               | 3 |
| AT.AT       | X | 93038534 | 93038544 | 5.5     | .                  | .     | intergenic | 0.119  | .               | 2 |
| AT.AT       | X | 93138674 | 93138690 | 8.5     | .                  | .     | intergenic | .      | rs788205007     | 2 |
| AT.AT       | X | 93307451 | 93307461 | 5.5     | .                  | .     | intergenic | 0.927  | rs789926969     | 3 |
| AT.AT       | X | 93447199 | 93447222 | 12      | .                  | .     | intergenic | .      | rs792490935     | 2 |
| AAAT.ATTT   | X | 93588385 | 93588399 | 3.75    | .                  | .     | intergenic | 0.034  | .               | 2 |
| AC.GT       | X | 93650191 | 93650204 | 7       | .                  | .     | intergenic | .      | rs791536584     | 2 |
| AAAAC.GTTTT | X | 93665578 | 93665596 | 3.8     | .                  | .     | intergenic | .      | rs792177801     | 2 |
| AAAAT.ATTTT | X | 93746242 | 93746261 | 4       | .                  | .     | intergenic | 0.761  | rs787602762     | 2 |
| AGAGG.CCTCT | X | 93862216 | 93862230 | 3       | .                  | .     | intergenic | .      | rs793057812     | 2 |
| AAAAG.CTTTT | X | 93930709 | 93930737 | 4.83333 | .                  | .     | intergenic | .      | rs787574849     | 2 |
| AT.AT       | X | 93973448 | 93973461 | 7       | .                  | .     | intergenic | .      | rs790490206     | 2 |
| AAAT.ATTT   | X | 93982840 | 93982861 | 5.5     | .                  | .     | intergenic | 0.021  | rs793794887     | 2 |
| AC.GT       | X | 94014315 | 94014327 | 6.5     | .                  | .     | intergenic | -0.132 | .               | 2 |
| AAAAT.ATTTT | X | 94174496 | 94174518 | 4.6     | .                  | .     | intergenic | 0.294  | rs790791827     | 2 |
| AAC.GTT     | X | 94283897 | 94283910 | 4.66667 | .                  | .     | intergenic | 0.09   | .               | 2 |
| AT.AT       | X | 94285592 | 94285602 | 5.5     | .                  | .     | intergenic | -1.291 | rs788547646     | 2 |
| AAG.CTT     | X | 94394594 | 94394621 | 9.33333 | ENSSSCT00000023372 | .     | cds        | .      | rs788365930     | 2 |
| AAAC.GTTT   | X | 95122360 | 95122387 | 7       | .                  | .     | intergenic | .      | rs790934583     | 2 |
| AATT.AATT   | X | 95123003 | 95123024 | 5.5     | .                  | .     | intergenic | .      | rs793100888     | 2 |
| AAAAC.GTTTT | X | 95209585 | 95209603 | 3.8     | .                  | .     | intergenic | 0.188  | rs787109511     | 2 |
| AT.AT       | X | 95367674 | 95367687 | 7       | .                  | .     | intergenic | -0.223 | .               | 2 |
| AGAT.ATCT   | X | 95669006 | 95669044 | 9.75    | .                  | .     | intergenic | .      | rs788569040     | 2 |
| AC.GT       | X | 96397935 | 96397947 | 6.5     | .                  | .     | intergenic | .      | rs790419754     | 2 |
| AT.AT       | X | 96478413 | 96478436 | 12      | .                  | .     | intergenic | .      | rs793256035     | 2 |
| AT.AT       | X | 96506326 | 96506336 | 5.5     | .                  | .     | intergenic | -0.226 | rs165407 rs7927 | 2 |
| AG.CT       | X | 96517114 | 96517138 | 12.5    | .                  | .     | intergenic | .      | rs787902160     | 2 |
| AG.CT       | X | 96531396 | 96531407 | 6       | .                  | .     | intergenic | .      | rs790360831     | 2 |
| AAAT.ATTT   | X | 96562034 | 96562052 | 4.75    | .                  | .     | intergenic | 0.169  | rs788339648     | 2 |
| AC.GT       | X | 96633657 | 96633689 | 16.5    | .                  | .     | intergenic | .      | rs787575456     | 3 |
| AT.AT       | X | 96637405 | 96637416 | 6       | .                  | .     | intergenic | -0.018 | rs788056355     | 2 |
| AAAC.GTTT   | X | 96665561 | 96665584 | 6       | .                  | .     | intergenic | .      | .               | 2 |
| ACT.AGT     | X | 96722582 | 96722594 | 4.33333 | .                  | .     | intergenic | .      | rs790308767     | 2 |

|             |   |           |           |         |                    |          |            |        |               |   |
|-------------|---|-----------|-----------|---------|--------------------|----------|------------|--------|---------------|---|
| AAAC.GTTT   | X | 96794662  | 96794680  | 4.75    | .                  | .        | intergenic | .      | rs789225210   | 2 |
| AC.GT       | X | 96823495  | 96823507  | 6.5     | .                  | .        | intergenic | .      | rs789560253   | 2 |
| AT.AT       | X | 97011874  | 97011885  | 6       | .                  | .        | intergenic | .      | rs793772649   | 2 |
| AT.AT       | X | 97131339  | 97131351  | 6.5     | .                  | .        | intergenic | .      | rs786571001   | 2 |
| AC.GT       | X | 97383980  | 97383989  | 5       | .                  | .        | intergenic | .      | rs790892118   | 2 |
| AATC.GATT   | X | 97437677  | 97437703  | 6.75    | .                  | .        | intergenic | .      | 356813 rs7885 | 2 |
| AAAAC.GTTTT | X | 97483740  | 97483765  | 5.2     | .                  | .        | intergenic | .      | rs788715285   | 2 |
| ACC.GGT     | X | 97660007  | 97660020  | 4.66667 | .                  | .        | intergenic | -0.148 | .             | 2 |
| AAAAC.GTTTT | X | 97702243  | 97702262  | 4       | .                  | .        | intergenic | .      | .             | 2 |
| AT.AT       | X | 97734981  | 97734992  | 6       | .                  | .        | intergenic | .      | rs793022127   | 2 |
| AATT.AATT   | X | 97782979  | 97783000  | 5.5     | .                  | .        | intergenic | .      | rs786422323   | 2 |
| AC.GT       | X | 98013674  | 98013689  | 8       | ENSSSCT00000013694 | .        | promoter   | 0.185  | rs791511199   | 2 |
| AAAC.GTTT   | X | 98116852  | 98116876  | 6.25    | .                  | .        | intergenic | 0.139  | rs789459856   | 2 |
| AAAAC.GTTTT | X | 98201560  | 98201585  | 5.2     | .                  | .        | intergenic | -0.145 | rs791101592   | 2 |
| AAC.GTT     | X | 98217160  | 98217175  | 5.33333 | .                  | .        | intergenic | -0.081 | rs793797775   | 2 |
| AC.GT       | X | 98236628  | 98236638  | 5.5     | .                  | .        | intergenic | 0.111  | rs789663279   | 2 |
| AG.CT       | X | 98319098  | 98319108  | 5.5     | .                  | .        | intergenic | .      | rs789652629   | 3 |
| AG.CT       | X | 98373789  | 98373803  | 7.5     | .                  | .        | intergenic | 0.461  | rs786459861   | 2 |
| AAC.GTT     | X | 98485944  | 98485957  | 4.66667 | .                  | .        | intergenic | 0.229  | rs791036096   | 2 |
| AC.GT       | X | 98653083  | 98653111  | 14.5    | ENSSSCT00000033539 | PLP1     | intron     | 1.589  | .             | 3 |
| AC.GT       | X | 98653083  | 98653111  | 14.5    | ENSSSCT00000035182 | PLP1     | intron     | 1.589  | .             | 3 |
| AC.GT       | X | 98653083  | 98653111  | 14.5    | ENSSSCT00000035493 | PLP1     | intron     | 1.589  | .             | 3 |
| AC.GT       | X | 98653083  | 98653111  | 14.5    | ENSSSCT00000034814 | PLP1     | intron     | 1.589  | .             | 3 |
| AC.GT       | X | 98653083  | 98653111  | 14.5    | ENSSSCT00000013705 | PLP1     | intron     | 1.589  | .             | 3 |
| AC.GT       | X | 98653083  | 98653111  | 14.5    | ENSSSCT00000033433 | PLP1     | intron     | 1.589  | .             | 3 |
| AC.GT       | X | 99003665  | 99003676  | 6       | .                  | .        | intergenic | 0.189  | rs792976538   | 2 |
| AG.CT       | X | 99278225  | 99278237  | 6.5     | .                  | .        | intergenic | 0.327  | rs786525179   | 2 |
| AT.AT       | X | 99554770  | 99554779  | 5       | ENSSSCT00000034930 | IL1RAPL2 | intron     | .      | .             | 4 |
| AAAAT.ATTTT | X | 99620011  | 99620032  | 4.4     | ENSSSCT00000034930 | IL1RAPL2 | intron     | 0.025  | rs790231431   | 2 |
| AC.GT       | X | 99666562  | 99666573  | 6       | ENSSSCT00000034930 | IL1RAPL2 | intron     | 0.103  | rs789982958   | 2 |
| AC.GT       | X | 99835071  | 99835081  | 5.5     | ENSSSCT00000034930 | IL1RAPL2 | intron     | 0.215  | rs788891399   | 3 |
| AT.AT       | X | 99840623  | 99840645  | 11.5    | ENSSSCT00000034930 | IL1RAPL2 | intron     | .      | rs787663403   | 2 |
| AAATT.AATTT | X | 99859168  | 99859188  | 4.2     | ENSSSCT00000034930 | IL1RAPL2 | intron     | 0.071  | .             | 2 |
| AT.AT       | X | 99883292  | 99883305  | 7       | ENSSSCT00000034930 | IL1RAPL2 | intron     | 0.214  | rs790555507   | 2 |
| AT.AT       | X | 99900764  | 99900775  | 6       | ENSSSCT00000034930 | IL1RAPL2 | intron     | 0.393  | rs791052868   | 2 |
| AAC.GTT     | X | 100093204 | 100093224 | 7       | ENSSSCT00000034930 | IL1RAPL2 | intron     | .      | rs793662628   | 2 |
| AT.AT       | X | 100493244 | 100493265 | 11      | ENSSSCT00000034930 | IL1RAPL2 | intron     | 0.18   | rs789628846   | 2 |
| AAAAC.GTTTT | X | 100502265 | 100502296 | 5.33333 | ENSSSCT00000034930 | IL1RAPL2 | intron     | 0.232  | .             | 2 |
| AC.GT       | X | 100510477 | 100510487 | 5.5     | ENSSSCT00000034930 | IL1RAPL2 | intron     | 0.358  | .             | 4 |
| AG.CT       | X | 100519919 | 100519937 | 9.5     | ENSSSCT00000034930 | IL1RAPL2 | intron     | 0.18   | .             | 2 |
| AAAAC.GTTTT | X | 100753257 | 100753276 | 4       | ENSSSCT00000034930 | IL1RAPL2 | intron     | 0.618  | rs786915026   | 2 |
| AC.GT       | X | 100885724 | 100885734 | 5.5     | .                  | .        | intergenic | .      | rs787786823   | 3 |
| AT.AT       | X | 100908660 | 100908671 | 6       | ENSSSCT00000035651 | NRK      | intron     | 0.19   | rs788173567   | 3 |
| AAAAT.ATTTT | X | 100982772 | 100982789 | 3.6     | ENSSSCT00000013716 | .        | intron     | 0.299  | rs790355688   | 2 |
| AC.GT       | X | 101041997 | 101042006 | 5       | .                  | .        | intergenic | 0.148  | rs788474466   | 2 |
| AT.AT       | X | 101124118 | 101124129 | 6       | .                  | .        | intergenic | .      | rs789218015   | 2 |
| AG.CT       | X | 101191660 | 101191669 | 5       | .                  | .        | intergenic | 0.186  | rs793413130   | 2 |
| AAAC.GTTT   | X | 101397263 | 101397281 | 4.75    | ENSSSCT00000013721 | .        | intron     | 0.329  | rs786890164   | 2 |
| AAC.GTT     | X | 101664158 | 101664171 | 4.66667 | ENSSSCT00000013724 | TBC1D8B  | intron     | .      | rs789047898   | 2 |
| AAC.GTT     | X | 101664158 | 101664171 | 4.66667 | ENSSSCT00000035728 | TBC1D8B  | intron     | .      | rs789047898   | 2 |
| AC.GT       | X | 101933014 | 101933027 | 7       | ENSSSCT00000013728 | RBM41    | intron     | .      | rs787824541   | 3 |
| AAAC.GTTT   | X | 102222083 | 102222105 | 5.75    | .                  | .        | intergenic | 0.308  | rs789788039   | 2 |
| AAAC.GTTT   | X | 102497447 | 102497484 | 9.5     | ENSSSCT00000013734 | FRMPD3   | intron     | 0.28   | 302214 rs7922 | 4 |
| AAAG.CTTT   | X | 102545747 | 102545767 | 5.25    | .                  | .        | intergenic | 0.214  | rs792386451   | 2 |
| AG.CT       | X | 102766750 | 102766764 | 7.5     | ENSSSCT00000013739 | MID2     | intron     | 0.219  | rs789004582   | 2 |
| AAAC.GTTT   | X | 102900122 | 102900139 | 4.5     | .                  | .        | intergenic | 0.231  | rs789469796   | 2 |
| AC.GT       | X | 103654797 | 103654815 | 9.5     | .                  | .        | intergenic | 0.086  | .             | 2 |
| AC.GT       | X | 103808191 | 103808205 | 7.5     | .                  | .        | intergenic | 0.283  | 389872 rs7897 | 2 |
| AT.AT       | X | 103961009 | 103961024 | 8       | ENSSSCT00000013749 | AMMECR1  | intron     | 0.468  | rs791113642   | 2 |
| AT.AT       | X | 104660299 | 104660309 | 5.5     | .                  | .        | intergenic | .      | rs787730772   | 2 |
| AAAC.GTTT   | X | 104718083 | 104718106 | 6       | .                  | .        | intergenic | 0.282  | rs791114678   | 2 |
| AG.CT       | X | 105890024 | 105890035 | 6       | .                  | .        | intergenic | 0.155  | .             | 2 |
| AT.AT       | X | 106594064 | 106594074 | 5.5     | .                  | .        | intergenic | 0.235  | rs787139034   | 2 |
| AG.CT       | X | 106833430 | 106833442 | 6.5     | ENSSSCT00000033227 | LHFPL1   | intron     | -0.041 | .             | 3 |
| AG.CT       | X | 106833430 | 106833442 | 6.5     | ENSSSCT00000036569 | LHFPL1   | intron     | -0.041 | .             | 3 |
| AG.CT       | X | 106833430 | 106833442 | 6.5     | ENSSSCT00000013769 | LHFPL1   | intron     | -0.041 | .             | 3 |
| AG.CT       | X | 106882727 | 106882738 | 6       | .                  | .        | intergenic | .      | rs790053740   | 2 |
| AC.GT       | X | 106894298 | 106894309 | 6       | .                  | .        | intergenic | .      | rs789236363   | 2 |
| AAC.GTT     | X | 107146200 | 107146213 | 4.66667 | .                  | .        | intergenic | .      | rs791741145   | 2 |
| AT.AT       | X | 107222785 | 107222796 | 6       | .                  | .        | intergenic | .      | rs787145282   | 2 |
| AG.CT       | X | 107289908 | 107289920 | 6.5     | .                  | .        | intergenic | .      | .             | 2 |
| CCAGG.CCTGG | X | 107433427 | 107433446 | 3.33333 | .                  | .        | intergenic | 0.023  | .             | 2 |
| AGG.CCT     | X | 107482105 | 107482119 | 5       | .                  | .        | intergenic | 0.559  | rs793428613   | 2 |
| AT.AT       | X | 107889912 | 107889931 | 10      | .                  | .        | intergenic | .      | rs790872554   | 2 |
| AG.CT       | X | 108735351 | 108735364 | 7       | ENSSSCT00000035084 | HTR2C    | intron     | 0.107  | .             | 4 |
| AG.CT       | X | 109462755 | 109462765 | 5.5     | ENSSSCT00000013776 | PLS3     | intron     | 0.088  | rs790817181   | 2 |
| GGGC.GCCCC  | X | 109464104 | 109464123 | 3.33333 | ENSSSCT00000013776 | PLS3     | intron     | 0.273  | rs793030958   | 2 |
| AC.GT       | X | 110035250 | 110035262 | 6.5     | .                  | .        | intergenic | 0.038  | rs789990293   | 2 |
| AAAC.GTTT   | X | 110480278 | 110480299 | 5.5     | .                  | .        | intergenic | 0.192  | rs788368961   | 2 |
| AAT.ATT     | X | 110551295 | 110551313 | 6.33333 | .                  | .        | intergenic | 0.157  | rs792732897   | 2 |
| AC.GT       | X | 110555969 | 110555989 | 10.5    | .                  | .        | intergenic | -0.053 | rs788988815   | 2 |
| GATAT.ATATC | X | 110826918 | 110826948 | 5.16667 | .                  | .        | intergenic | 0.337  | rs793494037   | 2 |
| AT.AT       | X | 110878079 | 110878089 | 5.5     | .                  | .        | intergenic | 0.245  | .             | 2 |
| AC.GT       | X | 111083579 | 111083588 | 5       | .                  | .        | intergenic | .      | .             | 4 |

|             |   |           |           |         |                    |         |            |        |               |   |
|-------------|---|-----------|-----------|---------|--------------------|---------|------------|--------|---------------|---|
| AT.AT       | X | 111157127 | 111157139 | 6.5     | .                  | .       | intergenic | 0.132  | 338402 rs7873 | 2 |
| AT.AT       | X | 111217765 | 111217779 | 7.5     | .                  | .       | intergenic | 0.137  | rs788589024   | 2 |
| AT.AT       | X | 111388646 | 111388664 | 9.5     | .                  | .       | intergenic | .      | rs788868843   | 2 |
| AAAAC.GTTTT | X | 111816511 | 111816529 | 3.8     | .                  | .       | intergenic | 0.05   | 303347 rs7862 | 3 |
| AAAT.ATTT   | X | 113122832 | 113122845 | 3.5     | .                  | .       | intergenic | -0.546 | rs792888886   | 2 |
| AAAT.ATTT   | X | 113610965 | 113610981 | 4.25    | ENSSSCT00000013798 | 6-Sep   | intron     | -0.335 | 712620 rs7881 | 2 |
| AAAT.ATTT   | X | 113610965 | 113610981 | 4.25    | ENSSSCT00000035968 | 6-Sep   | intron     | -0.335 | 712620 rs7881 | 2 |
| AAAT.ATTT   | X | 113610965 | 113610981 | 4.25    | ENSSSCT00000035573 | 6-Sep   | intron     | -0.335 | 712620 rs7881 | 2 |
| AAAT.ATTT   | X | 113610965 | 113610981 | 4.25    | ENSSSCT00000035644 | 6-Sep   | intron     | -0.335 | 712620 rs7881 | 2 |
| AAAT.ATTT   | X | 113610965 | 113610981 | 4.25    | ENSSSCT00000034429 | 6-Sep   | intron     | -0.335 | 712620 rs7881 | 2 |
| AAAT.ATTT   | X | 113610965 | 113610981 | 4.25    | ENSSSCT00000034508 | 6-Sep   | intron     | -0.335 | 712620 rs7881 | 2 |
| AAAT.ATTT   | X | 113610965 | 113610981 | 4.25    | ENSSSCT00000033202 | 6-Sep   | intron     | -0.335 | 712620 rs7881 | 2 |
| AAAT.ATTT   | X | 113610965 | 113610981 | 4.25    | ENSSSCT00000036221 | 6-Sep   | intron     | -0.335 | 712620 rs7881 | 2 |
| AAAT.ATTT   | X | 113610965 | 113610981 | 4.25    | ENSSSCT00000034740 | 6-Sep   | intron     | -0.335 | 712620 rs7881 | 2 |
| AAAC.GTTT   | X | 113648716 | 113648745 | 7.5     | ENSSSCT00000013799 | NKRF    | intron     | .      | .             | 2 |
| AAAC.GTTT   | X | 113648716 | 113648745 | 7.5     | ENSSSCT00000036344 | NKRF    | intron     | .      | .             | 2 |
| AAAC.GTTT   | X | 113648716 | 113648745 | 7.5     | ENSSSCT00000034398 | NKRF    | promoter   | .      | .             | 2 |
| AAAAC.GTTTT | X | 113720695 | 113720713 | 3.8     | .                  | .       | intergenic | .      | rs792382169   | 2 |
| AAAT.ATTT   | X | 114461047 | 114461062 | 4       | ENSSSCT00000013815 | .       | intron     | -0.063 | 328734 rs7887 | 2 |
| AAAT.ATTT   | X | 114461047 | 114461062 | 4       | ENSSSCT00000035722 | DOCK11  | intron     | -0.063 | 328734 rs7887 | 2 |
| AAAAC.GTTTT | X | 114485716 | 114485738 | 3.83333 | ENSSSCT00000013815 | .       | cds        | 0.434  | rs792712529   | 2 |
| AAAAC.GTTTT | X | 114485716 | 114485738 | 3.83333 | ENSSSCT00000013815 | .       | intron     | 0.434  | rs792712529   | 2 |
| AAAAC.GTTTT | X | 114485716 | 114485738 | 3.83333 | ENSSSCT00000035005 | DOCK11  | intron     | 0.434  | rs792712529   | 2 |
| AAAAC.GTTTT | X | 114485716 | 114485738 | 3.83333 | ENSSSCT00000035722 | DOCK11  | intron     | 0.434  | rs792712529   | 2 |
| AT.AT       | X | 114498608 | 114498618 | 5.5     | ENSSSCT00000013815 | .       | intron     | 0.145  | .             | 2 |
| AT.AT       | X | 114498608 | 114498618 | 5.5     | ENSSSCT00000035722 | DOCK11  | intron     | 0.145  | .             | 2 |
| AAAC.GTTT   | X | 114547891 | 114547918 | 7       | ENSSSCT00000013815 | .       | intron     | 0.297  | rs792302123   | 2 |
| AAAC.GTTT   | X | 114547891 | 114547918 | 7       | ENSSSCT00000035722 | DOCK11  | intron     | 0.297  | rs792302123   | 2 |
| ATCC.GGAT   | X | 115024835 | 115024864 | 7.5     | .                  | .       | intergenic | 0.068  | rs787283372   | 2 |
| AT.AT       | X | 115718167 | 115718177 | 5.5     | ENSSSCT00000013819 | GRIA3   | intron     | .      | rs789414883   | 2 |
| AT.AT       | X | 115718167 | 115718177 | 5.5     | ENSSSCT00000032933 | GRIA3   | intron     | .      | rs789414883   | 2 |
| AT.AT       | X | 115718167 | 115718177 | 5.5     | ENSSSCT00000036560 | GRIA3   | intron     | .      | rs789414883   | 2 |
| AAAC.GTTT   | X | 116374435 | 116374455 | 5.25    | ENSSSCT00000013823 | STAG2   | intron     | 0.229  | rs792581610   | 2 |
| AAG.CTT     | X | 116489113 | 116489129 | 5.66667 | .                  | .       | intergenic | 0.359  | rs787664252   | 2 |
| AG.CT       | X | 116534044 | 116534056 | 6.5     | .                  | .       | intergenic | 0.161  | rs790791408   | 2 |
| AAC.GTT     | X | 116723274 | 116723291 | 6       | .                  | .       | intergenic | 1.23   | rs786593162   | 2 |
| AG.CT       | X | 117092101 | 117092117 | 8.5     | ENSSSCT00000033370 | TENM1   | intron     | 0.084  | .             | 4 |
| AC.GT       | X | 117116792 | 117116809 | 9       | ENSSSCT00000033370 | TENM1   | intron     | 1.655  | .             | 3 |
| AAAC.GTTT   | X | 117258195 | 117258222 | 7       | ENSSSCT00000033370 | TENM1   | intron     | .      | .             | 2 |
| AAAC.GTTT   | X | 117258195 | 117258222 | 7       | ENSSSCT00000030109 | U2      | promoter   | .      | .             | 2 |
| AT.AT       | X | 117579380 | 117579389 | 5       | .                  | .       | intergenic | 0.219  | rs792056007   | 2 |
| AT.AT       | X | 117581945 | 117581957 | 6.5     | .                  | .       | intergenic | 0.282  | .             | 2 |
| AAAT.ATT    | X | 117611033 | 117611054 | 7.33333 | .                  | .       | intergenic | 0.513  | rs791836397   | 2 |
| AAAAC.GTTTT | X | 117687477 | 117687505 | 5.8     | .                  | .       | intergenic | 0.437  | rs789538764   | 2 |
| AAT.ATT     | X | 117719241 | 117719255 | 5       | .                  | .       | intergenic | 0.496  | rs789519529   | 2 |
| AC.GT       | X | 118109367 | 118109378 | 6       | .                  | .       | intergenic | 0.063  | 375609 rs6920 | 4 |
| AAAAC.GTTTT | X | 118163715 | 118163743 | 5.8     | .                  | .       | intergenic | 0.477  | rs792046128   | 2 |
| AT.AT       | X | 118662866 | 118662878 | 6.5     | .                  | .       | intergenic | 0.218  | rs788554439   | 2 |
| AC.GT       | X | 118702361 | 118702371 | 5.5     | .                  | .       | intergenic | 0.006  | .             | 4 |
| AG.CT       | X | 118911571 | 118911603 | 16.5    | .                  | .       | intergenic | 0.083  | rs789546047   | 2 |
| AAC.GTT     | X | 118914116 | 118914135 | 6.66667 | .                  | .       | intergenic | 0.171  | rs793621895   | 2 |
| AC.GT       | X | 118968737 | 118968748 | 6       | .                  | .       | intergenic | -0.067 | rs792468071   | 2 |
| AG.CT       | X | 119390409 | 119390419 | 5.5     | .                  | .       | intergenic | -0.144 | .             | 2 |
| AT.AT       | X | 119473622 | 119473637 | 8       | .                  | .       | intergenic | .      | rs792127392   | 2 |
| AT.AT       | X | 119652451 | 119652462 | 6       | .                  | .       | intergenic | .      | rs791754764   | 2 |
| AG.CT       | X | 120886661 | 120886670 | 5       | .                  | .       | intergenic | 0.469  | rs790407818   | 2 |
| AAC.GTT     | X | 120939955 | 120939970 | 5.33333 | .                  | .       | intergenic | .      | rs793605184   | 2 |
| AAAAC.GTTTT | X | 121311469 | 121311483 | 3       | .                  | .       | intergenic | 0.353  | rs793469258   | 2 |
| AG.CT       | X | 121324586 | 121324596 | 5.5     | .                  | .       | intergenic | 0.582  | rs786227941   | 3 |
| AAAT.ATTT   | X | 121935312 | 121935325 | 3.5     | ENSSSCT00000013831 | OCRL    | intron     | 0.171  | 375467 rs7905 | 2 |
| AAAT.ATTT   | X | 121935312 | 121935325 | 3.5     | ENSSSCT00000035468 | OCRL    | intron     | 0.171  | 375467 rs7905 | 2 |
| AAAT.ATTT   | X | 121935312 | 121935325 | 3.5     | ENSSSCT00000036143 | OCRL    | intron     | 0.171  | 375467 rs7905 | 2 |
| AAAC.GTTT   | X | 121998310 | 121998328 | 4.75    | .                  | .       | intergenic | 0.303  | rs792123574   | 2 |
| AAAC.GTTT   | X | 122133590 | 122133606 | 4.25    | .                  | .       | intergenic | 0.087  | rs790202669   | 2 |
| AAAC.GTTT   | X | 122217874 | 122217892 | 4.75    | .                  | .       | intergenic | 0.097  | rs786317082   | 2 |
| AAAT.ATTT   | X | 122286230 | 122286252 | 5.75    | .                  | .       | intergenic | .      | rs787625612   | 2 |
| AAAC.GTTT   | X | 122561557 | 122561573 | 4.25    | ENSSSCT00000013840 | ZNF280C | intron     | 0.18   | rs790173553   | 2 |
| AAAC.GTTT   | X | 122561557 | 122561573 | 4.25    | ENSSSCT00000033263 | ZNF280C | intron     | 0.18   | rs790173553   | 2 |
| AG.CT       | X | 122940691 | 122940705 | 7.5     | ENSSSCT00000034092 | ENOX2   | intron     | -1.025 | .             | 2 |
| AG.CT       | X | 122940691 | 122940705 | 7.5     | ENSSSCT00000026646 | ENOX2   | intron     | -1.025 | .             | 2 |
| AG.CT       | X | 122940691 | 122940705 | 7.5     | ENSSSCT00000035630 | ENOX2   | intron     | -1.025 | .             | 2 |
| AG.CT       | X | 123652038 | 123652048 | 5.5     | .                  | .       | intergenic | 0.262  | rs790137626   | 2 |
| AC.GT       | X | 123868435 | 123868445 | 5.5     | .                  | .       | intergenic | 0.108  | rs698983496   | 3 |
| AAC.GTT     | X | 124018096 | 124018111 | 5.33333 | .                  | .       | intergenic | .      | 323309 rs7926 | 2 |
| AG.CT       | X | 124033403 | 124033413 | 5.5     | .                  | .       | intergenic | .      | .             | 4 |
| AAAC.GTTT   | X | 124033820 | 124033834 | 3.75    | .                  | .       | intergenic | .      | rs786808447   | 2 |
| AAC.GTT     | X | 124134751 | 124134763 | 4.33333 | .                  | .       | intergenic | 0.056  | rs792426782   | 3 |
| AGGGC.GCCCT | X | 124407155 | 124407178 | 4.8     | .                  | .       | intergenic | 0.159  | rs793177907   | 2 |
| AC.GT       | X | 124413324 | 124413341 | 9       | .                  | .       | intergenic | .      | .             | 2 |
| AAC.GTT     | X | 124466449 | 124466469 | 7       | .                  | .       | intergenic | .      | 726606 rs7896 | 2 |
| AT.AT       | X | 124474936 | 124474945 | 5       | .                  | .       | intergenic | 0.237  | .             | 2 |
| AC.GT       | X | 124558135 | 124558145 | 5.5     | .                  | .       | intergenic | .      | rs789920078   | 2 |
| AAC.GTT     | X | 124998276 | 124998289 | 4.66667 | .                  | .       | intergenic | 0.01   | rs787409280   | 2 |
| ATTAG.CTAAT | X | 125201122 | 125201143 | 3.66667 | .                  | .       | intergenic | 0.034  | rs792079171   | 2 |

|             |   |           |           |         |                    |              |            |        |               |   |
|-------------|---|-----------|-----------|---------|--------------------|--------------|------------|--------|---------------|---|
| AC.GT       | X | 125308237 | 125308249 | 6.5     | .                  | .            | intergenic | 0.031  | rs789089510   | 2 |
| AC.GT       | X | 125404334 | 125404346 | 6.5     | .                  | .            | intergenic | 1.11   | rs792394828   | 2 |
| AG.CT       | X | 125429690 | 125429700 | 5.5     | .                  | .            | intergenic | 0.05   | rs792101626   | 2 |
| AC.GT       | X | 125829394 | 125829403 | 5       | ENSSSCT00000013862 | GPC3         | intron     | 0.746  | rs787985736   | 2 |
| AAAT.ATTT   | X | 126099425 | 126099440 | 4       | .                  | .            | intergenic | 0.5    | rs790147175   | 2 |
| AC.GT       | X | 126130088 | 126130106 | 9.5     | .                  | .            | intergenic | 0.244  | .             | 2 |
| AAAC.GTTT   | X | 126302697 | 126302714 | 4.5     | .                  | .            | intergenic | .      | rs792630423   | 2 |
| AAAC.GTTT   | X | 126508867 | 126508895 | 7.25    | ENSSSCT00000034119 | FAM122C      | intron     | 0.056  | rs793343825   | 2 |
| AAAC.GTTT   | X | 126508867 | 126508895 | 7.25    | ENSSSCT00000033658 | FAM122C      | intron     | 0.056  | rs793343825   | 2 |
| AAAC.GTTT   | X | 126508867 | 126508895 | 7.25    | ENSSSCT00000034247 | FAM122C      | intron     | 0.056  | rs793343825   | 2 |
| AAAC.GTTT   | X | 126508867 | 126508895 | 7.25    | ENSSSCT00000035919 | FAM122C      | intron     | 0.056  | rs793343825   | 2 |
| AAAC.GTTT   | X | 126508867 | 126508895 | 7.25    | ENSSSCT00000034857 | FAM122C      | intron     | 0.056  | rs793343825   | 2 |
| AAAC.GTTT   | X | 126508867 | 126508895 | 7.25    | ENSSSCT00000034621 | FAM122C      | intron     | 0.056  | rs793343825   | 2 |
| AG.CT       | X | 126634361 | 126634382 | 11      | .                  | .            | intergenic | 0.032  | rs7929346866  | 4 |
| AC.GT       | X | 126988477 | 126988486 | 5       | ENSSSCT00000033983 | DDX26B       | intron     | 0.022  | rs786669414   | 3 |
| AC.GT       | X | 126988477 | 126988486 | 5       | ENSSSCT00000033063 | DDX26B       | intron     | 0.022  | rs786669414   | 3 |
| AC.GT       | X | 126988477 | 126988486 | 5       | ENSSSCT00000013878 | DDX26B       | intron     | 0.022  | rs786669414   | 3 |
| AC.GT       | X | 126988477 | 126988486 | 5       | ENSSSCT00000033505 | DDX26B       | promoter   | 0.022  | rs786669414   | 3 |
| AG.CT       | X | 127621880 | 127621890 | 5.5     | .                  | .            | intergenic | 0.939  | rs701993104   | 2 |
| AAC.GTT     | X | 128277283 | 128277295 | 4.33333 | .                  | .            | intergenic | .      | rs7891355725  | 2 |
| AG.CT       | X | 128342746 | 128342763 | 9       | .                  | .            | intergenic | .      | rs789573567   | 3 |
| AT.AT       | X | 128408989 | 128408999 | 5.5     | .                  | .            | intergenic | .      | rs789833648   | 2 |
| AAAC.GTTT   | X | 128476471 | 128476489 | 4.75    | .                  | .            | intergenic | 0.279  | rs790344260   | 2 |
| AAAAC.GTTTT | X | 128591545 | 128591568 | 4.8     | .                  | .            | intergenic | .      | rs790788706   | 2 |
| AC.GT       | X | 128665953 | 128665987 | 17.5    | .                  | .            | intergenic | 0.255  | .             | 2 |
| AT.AT       | X | 128717118 | 128717129 | 6       | .                  | .            | intergenic | .      | rs788806337   | 2 |
| AC.GT       | X | 129507081 | 129507107 | 13.5    | .                  | .            | intergenic | .      | rs788354141   | 5 |
| AG.CT       | X | 129652604 | 129652614 | 5.5     | ENSSSCT00000029012 | FGF13        | intron     | 0.195  | rs788796963   | 2 |
| AG.CT       | X | 129652604 | 129652614 | 5.5     | ENSSSCT00000021518 | ssc-mir-504  | promoter   | 0.195  | rs788796963   | 2 |
| AAC.GTT     | X | 129762391 | 129762409 | 6.33333 | .                  | .            | intergenic | -0.004 | rs792550389   | 2 |
| AAAC.GTTT   | X | 129863552 | 129863578 | 6.75    | .                  | .            | intergenic | -0.314 | rs789351317   | 2 |
| AT.AT       | X | 129975811 | 129975822 | 6       | .                  | .            | intergenic | 0.134  | rs78972396972 | 2 |
| ATCC.GGAT   | X | 130056644 | 130056665 | 5.5     | .                  | .            | intergenic | .      | rs790413356   | 2 |
| AT.AT       | X | 130472870 | 130472879 | 5       | ENSSSCT00000013898 | MCF2         | intron     | 0.207  | rs792392851   | 2 |
| AG.CT       | X | 130713960 | 130713971 | 6       | ENSSSCT00000013899 | ATP11C       | intron     | 0.184  | rs791997431   | 2 |
| AAAAC.GTTTT | X | 130738543 | 130738562 | 4       | ENSSSCT00000013899 | ATP11C       | intron     | 0.191  | rs792307460   | 2 |
| ACAT.ATGT   | X | 130912916 | 130912934 | 4.75    | .                  | .            | intergenic | 0.392  | rs789742404   | 2 |
| AAAAT.ATTTT | X | 130924703 | 130924719 | 3.4     | .                  | .            | intergenic | 0.167  | rs792711403   | 2 |
| AAAT.ATTT   | X | 131047687 | 131047709 | 5.75    | .                  | .            | intergenic | 0.547  | rs790750720   | 2 |
| AAC.GTT     | X | 131276456 | 131276471 | 5.33333 | .                  | .            | intergenic | .      | rs788948555   | 2 |
| AT.AT       | X | 131347239 | 131347276 | 19      | .                  | .            | intergenic | 0.19   | rs7870362047  | 2 |
| AC.GT       | X | 131483414 | 131483425 | 6       | ENSSSCT00000034891 | rs1242-17611 | promoter   | 0.115  | rs7927180564  | 2 |
| AAT.ATT     | X | 131541219 | 131541232 | 4.66667 | .                  | .            | intergenic | 0.623  | rs788520075   | 3 |
| AAAC.GTTT   | X | 132049655 | 132049679 | 6.25    | .                  | .            | intergenic | 0.083  | .             | 2 |
| AT.AT       | X | 132323268 | 132323280 | 6.5     | .                  | .            | intergenic | 0.01   | rs788774980   | 2 |
| ACC.GGT     | X | 132407414 | 132407428 | 5       | .                  | .            | intergenic | .      | rs792678511   | 2 |
| AAAC.GTTT   | X | 132431782 | 132431797 | 4       | .                  | .            | intergenic | 0.056  | rs7929300381  | 4 |
| AC.GT       | X | 132537838 | 132537855 | 9       | .                  | .            | intergenic | 0.088  | .             | 2 |
| AAC.GTT     | X | 132808238 | 132808255 | 6       | .                  | .            | intergenic | .      | .             | 2 |
| AC.GT       | X | 132885164 | 132885176 | 6.5     | .                  | .            | intergenic | 0.009  | rs790421315   | 3 |
| AG.CT       | X | 132982207 | 132982217 | 5.5     | .                  | .            | intergenic | .      | .             | 2 |
| AC.GT       | X | 133160879 | 133160898 | 10      | .                  | .            | intergenic | .      | .             | 2 |
| AAGG.CCTT   | X | 133750323 | 133750344 | 5.5     | ENSSSCT00000036202 | rs1242-52212 | intron     | -0.179 | rs792572226   | 2 |
| AAAG.CTTT   | X | 133903733 | 133903746 | 3.5     | ENSSSCT00000036202 | rs1242-52212 | intron     | 0.005  | rs787221756   | 2 |
| AC.GT       | X | 134242320 | 134242330 | 5.5     | ENSSSCT00000036202 | rs1242-52212 | intron     | 0.003  | rs789134361   | 3 |
| AT.AT       | X | 134244773 | 134244782 | 5       | ENSSSCT00000036202 | rs1242-52212 | intron     | 0.275  | rs786890758   | 3 |
| AC.GT       | X | 134476434 | 134476446 | 6.5     | .                  | .            | intergenic | -0.413 | .             | 2 |
| AAC.GTT     | X | 134883691 | 134883704 | 4.66667 | .                  | .            | intergenic | -0.151 | .             | 2 |
| AC.GT       | X | 135281010 | 135281024 | 7.5     | .                  | .            | intergenic | .      | rs706115978   | 2 |
| AAAC.GTTT   | X | 135410416 | 135410434 | 4.75    | .                  | .            | intergenic | .      | rs790308569   | 2 |
| AT.AT       | X | 135461249 | 135461260 | 6       | .                  | .            | intergenic | .      | rs78869685    | 2 |
| AAT.ATT     | X | 135461707 | 135461723 | 5.66667 | .                  | .            | intergenic | .      | rs786560260   | 2 |
| AAAT.ATTT   | X | 135686088 | 135686101 | 3.5     | .                  | .            | intergenic | .      | rs787431963   | 2 |
| AG.CT       | X | 135867673 | 135867691 | 9.5     | .                  | .            | intergenic | -0.004 | rs786728112   | 2 |
| AC.GT       | X | 136010747 | 136010773 | 13.5    | .                  | .            | intergenic | .      | rs790614937   | 3 |
| AT.AT       | X | 136027366 | 136027379 | 7       | .                  | .            | intergenic | .      | .             | 2 |
| AG.CT       | X | 136045151 | 136045162 | 6       | .                  | .            | intergenic | 0.042  | .             | 2 |
| AC.GT       | X | 136196560 | 136196587 | 14      | .                  | .            | intergenic | -0.195 | rs792657051   | 2 |
| AG.CT       | X | 136210862 | 136210871 | 5       | .                  | .            | intergenic | 0.148  | .             | 2 |
| AAAG.CTTT   | X | 136387615 | 136387645 | 7.75    | .                  | .            | intergenic | 0.076  | rs787025725   | 2 |
| AC.GT       | X | 136421407 | 136421419 | 6.5     | .                  | .            | intergenic | 0.101  | rs790521711   | 2 |
| AT.AT       | X | 136631517 | 136631534 | 9       | .                  | .            | intergenic | .      | rs792199874   | 2 |
| AAAT.ATTT   | X | 136841904 | 136841925 | 5.5     | .                  | .            | intergenic | 0.274  | rs792133606   | 2 |
| AAAG.CTTT   | X | 136856894 | 136856913 | 5       | .                  | .            | intergenic | .      | rs786662800   | 2 |
| AT.AT       | X | 137102925 | 137102936 | 6       | .                  | .            | intergenic | .      | rs786215988   | 3 |
| AAAT.ATTT   | X | 137484926 | 137484938 | 3.25    | .                  | .            | intergenic | 0.098  | rs793724611   | 2 |
| AGGG.CCCT   | X | 137719051 | 137719063 | 3.25    | .                  | .            | intergenic | -0.013 | .             | 2 |
| AAAAC.GTTTT | X | 137842009 | 137842032 | 4.8     | .                  | .            | intergenic | 0.23   | rs786841233   | 3 |
| AACC.GGTT   | X | 137994785 | 137994813 | 7.25    | .                  | .            | intergenic | 0.084  | rs792402999   | 3 |
| AG.CT       | X | 138148198 | 138148213 | 8       | .                  | .            | intergenic | 0.083  | rs787828470   | 2 |
| AAC.GTT     | X | 138236855 | 138236883 | 9.66667 | .                  | .            | intergenic | 0.309  | rs790347507   | 2 |
| AAG.CTT     | X | 138442987 | 138443001 | 5       | ENSSSCT00000013917 | AFF2         | intron     | 0.462  | rs786421766   | 2 |
| AC.GT       | X | 138474113 | 138474123 | 5.5     | ENSSSCT00000013917 | AFF2         | intron     | 0.197  | rs790316203   | 2 |
| AG.CT       | X | 138576943 | 138576952 | 5       | ENSSSCT00000013917 | AFF2         | intron     | 0.31   | rs790137645   | 2 |



|             |   |           |           |         |                    |       |            |        |               |   |
|-------------|---|-----------|-----------|---------|--------------------|-------|------------|--------|---------------|---|
| AATG.CATT   | X | 138785931 | 138785962 | 8       | .                  | .     | intergenic | 0.047  | 376563 rs7930 | 2 |
| AC.GT       | X | 139627871 | 139627881 | 5.5     | .                  | .     | intergenic | -0.185 | rs788333674   | 2 |
| AGAT.ATCT   | X | 140346886 | 140346901 | 4       | .                  | .     | intergenic | 0.184  | rs787934905   | 2 |
| ACAT.ATGT   | X | 140382144 | 140382166 | 5.75    | .                  | .     | intergenic | 0.219  | 305994 rs7870 | 2 |
| AAC.GTT     | X | 140543095 | 140543114 | 6.66667 | .                  | .     | intergenic | .      | rs788245836   | 2 |
| AT.AT       | X | 140595675 | 140595685 | 5.5     | .                  | .     | intergenic | 0.099  | rs793819929   | 2 |
| AAAT.ATTT   | X | 140808537 | 140808563 | 6.75    | .                  | .     | intergenic | 0.278  | rs790901175   | 2 |
| AC.GT       | X | 141373574 | 141373588 | 7.5     | ENSSSCT00000034124 | CETN2 | intron     | 1.202  | rs788472291   | 2 |
| AC.GT       | X | 141373574 | 141373588 | 7.5     | ENSSSCT00000032639 | CETN2 | intron     | 1.202  | rs788472291   | 2 |
| AC.GT       | X | 141373574 | 141373588 | 7.5     | ENSSSCT00000013947 | CETN2 | intron     | 1.202  | rs788472291   | 2 |
| AC.GT       | X | 141373574 | 141373588 | 7.5     | ENSSSCT00000033471 | CETN2 | intron     | 1.202  | rs788472291   | 2 |
| AT.AT       | X | 141407326 | 141407342 | 8.5     | .                  | .     | intergenic | -0.039 | rs793491580   | 4 |
| AC.GT       | X | 142191018 | 142191030 | 6.5     | .                  | .     | intergenic | .      | rs791729025   | 3 |
| AAAAC.GTTTT | X | 143222896 | 143222916 | 4.2     | .                  | .     | intergenic | -0.098 | rs790268045   | 2 |
| AATT.AATT   | X | 143853116 | 143853129 | 3.5     | .                  | .     | intergenic | .      | .             | 2 |
| AC.GT       | X | 143857650 | 143857662 | 6.5     | .                  | .     | intergenic | .      | 383018 rs7911 | 2 |
| AAG.CTT     | X | 144153854 | 144153865 | 4       | ENSSSCT00000014028 | PRKX  | intron     | .      | .             | 5 |
| ATCC.GGAT   | X | 144159488 | 144159506 | 4.75    | ENSSSCT00000014028 | PRKX  | intron     | .      | .             | 2 |

### Supplementary Figure S1.

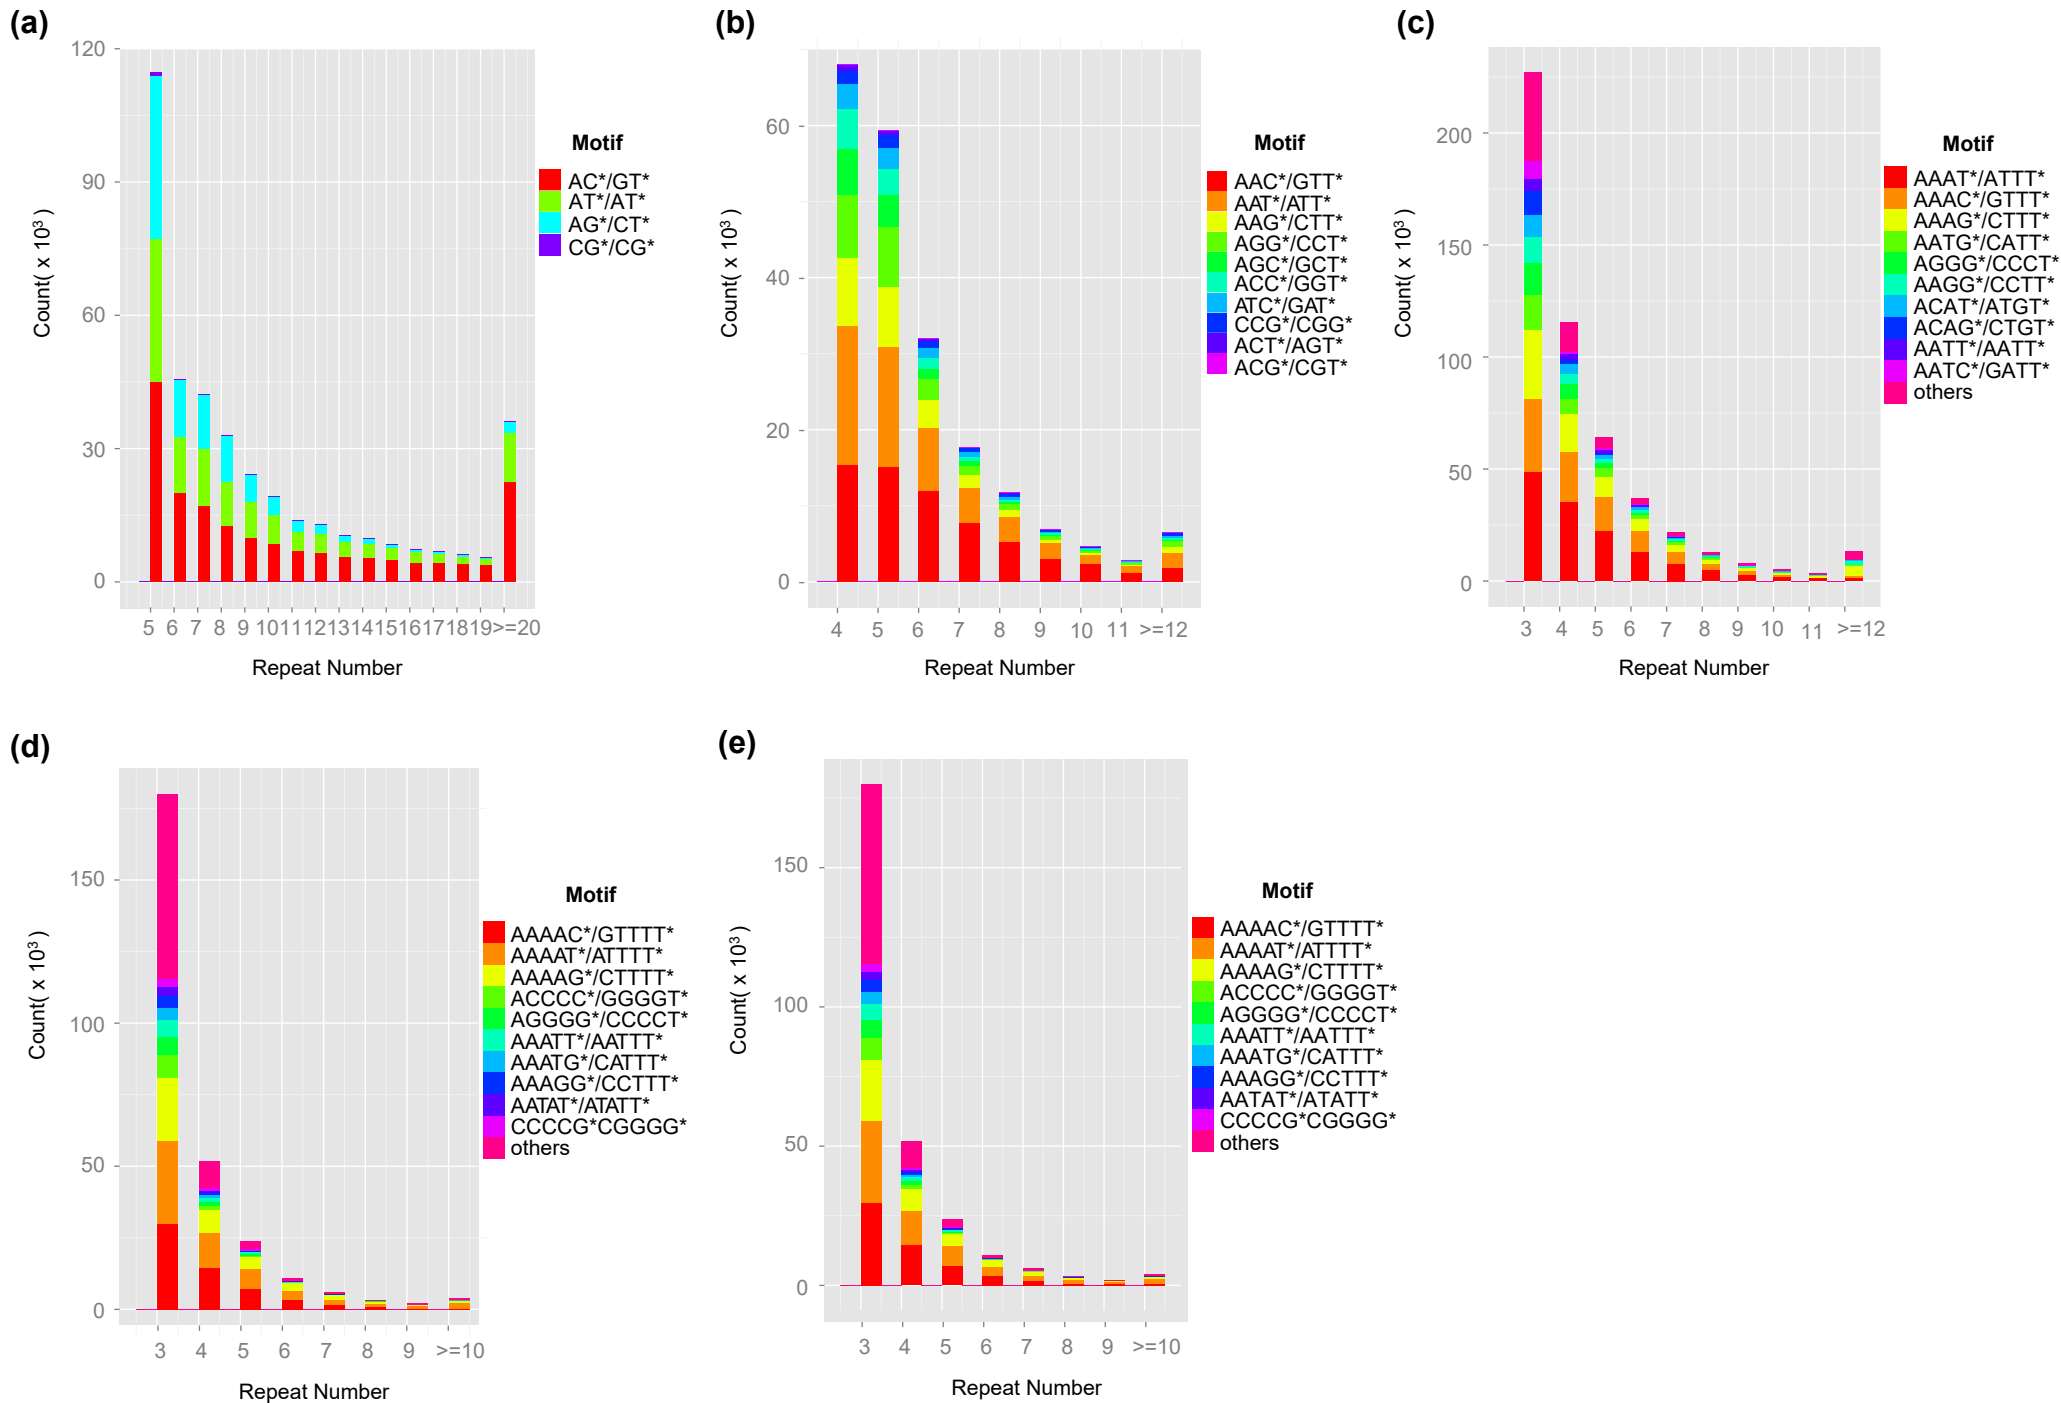

**Frequency distribution of overall SSRs in reference genome.** (a) Dinucleotide, (b) Trinucleotide, (c) Tetranucleotide, (d) Pentanucleotide, (e) Hexanucleotide. The count distribution of different SSRs is classified according to the repeat number of the motif.

Supplementary Figure S2.

(a)

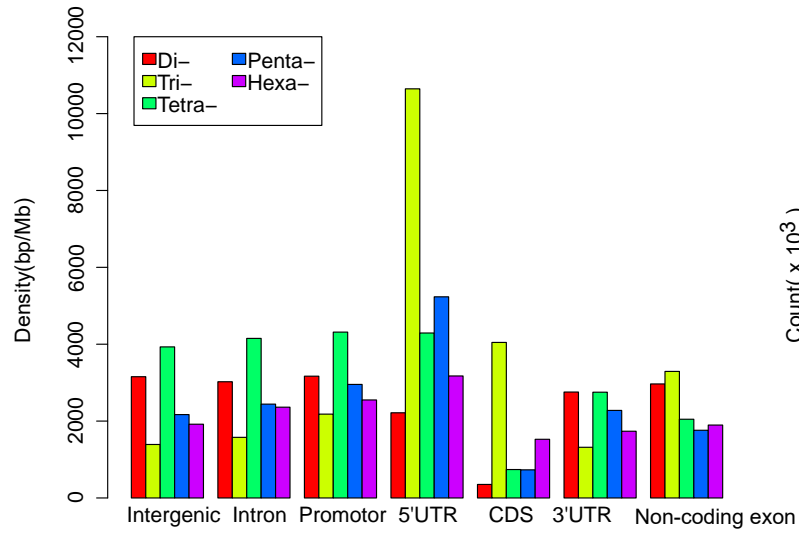

(b)

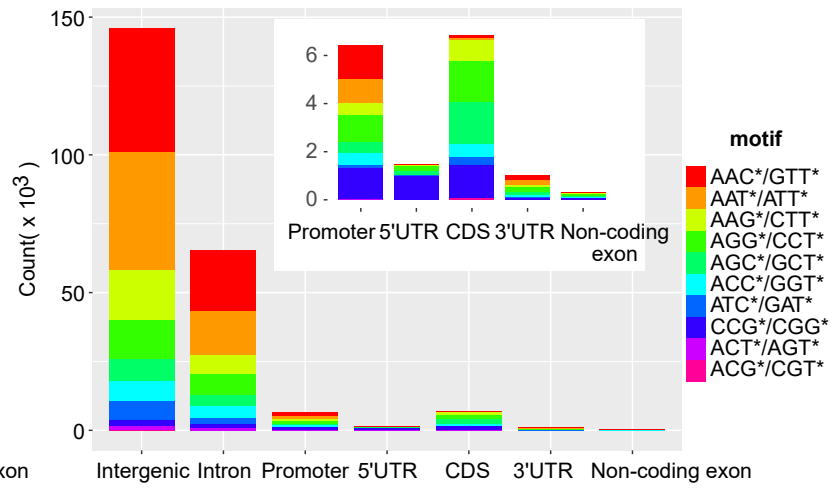

**Overall SSRs distribution in different genomic region.** (a) The distribution of each kind of SSR in different genomic regions. (b) The distribution of trinucleotide SSRs in different genomic regions.

### Supplementary Figure S3.

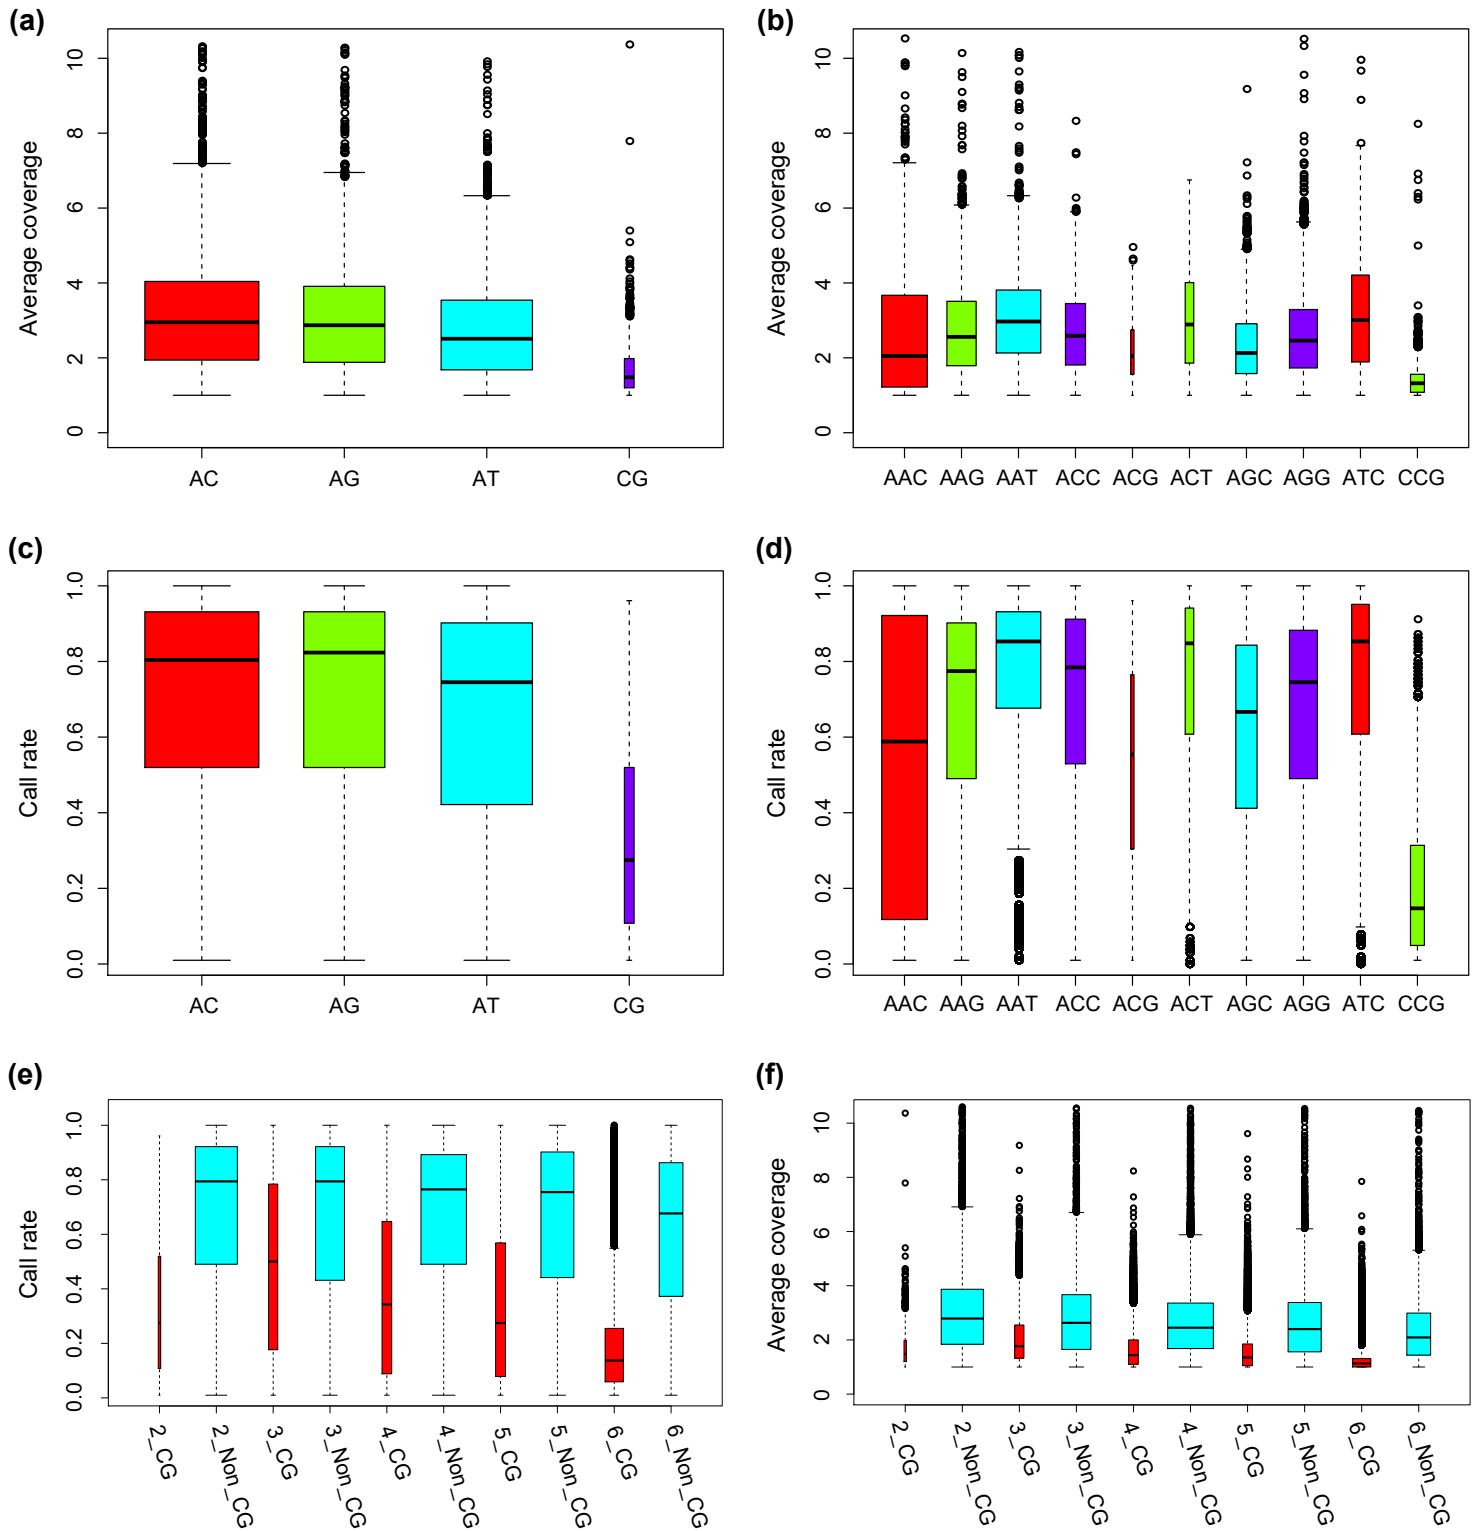

**Motif type effect to Call rate and sequence coverage.** (a) The average coverage of different motifs in dinucleotide SSRs. (b) The average coverage of different motifs in trinucleotide SSRs. (c) The call rate of different motifs in dinucleotide SSRs. (d) The call rate of different motifs in trinucleotide SSRs. (e) Comparison of the call rate between CG-containing motifs and non-CG containing motifs. (f) Comparison of the average coverage between CG-containing motifs and non-CG containing motifs. The numbers in (e) and (f) represent different SSR type.

# Supplementary Figure S4.

(a)

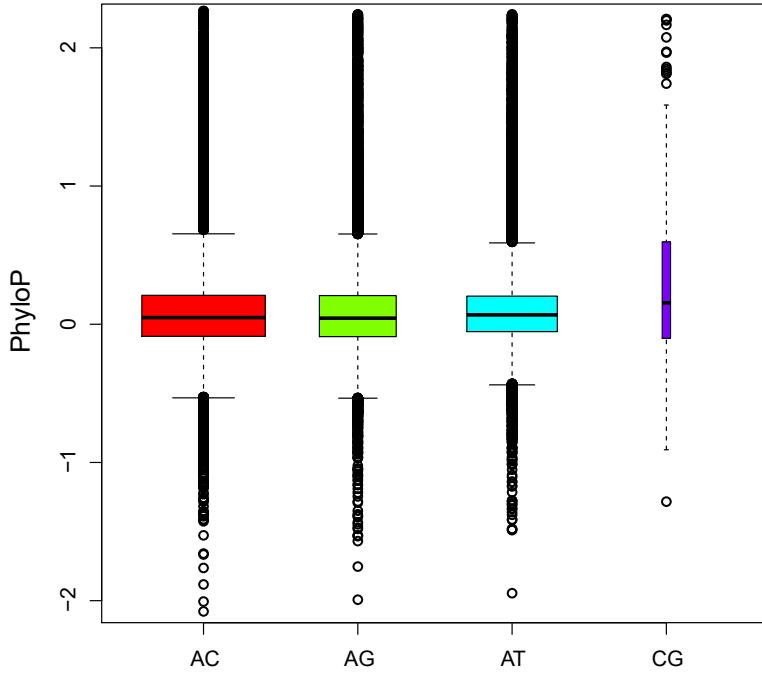

(b)

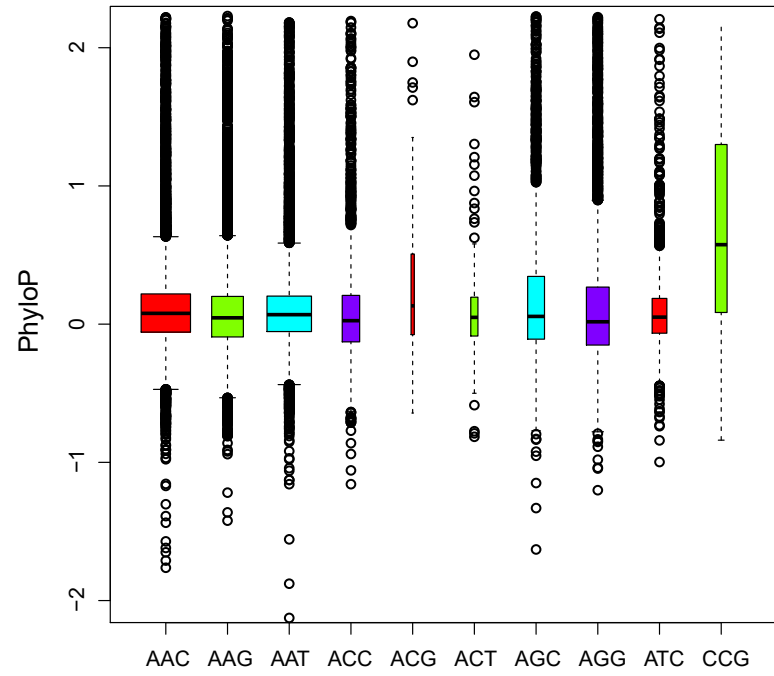

**The PhyloP score comparisons among different motifs.** (a) Comparison of the PhyloP score in all identified dinucleotide polymorphic SSRs. (b) Comparison of the PhyloP score in all identified trinucleotide polymorphic SSRs.
